# Supplementary material for: A Au(i)-catalyzed hydrogen bond-directed tandem strategy to synthesize indeno-chromen-4-one and indeno-quinolin-4-one derivatives
Source: Royal Society of Chemistry journal article supplement (doi:10.1039/c6cc05391b), 2016-01-01

## Supporting Information

### **Au(I)-Catalyzed Hydrogen Bond-Directed Tandem Strategy to Indeno-chromen-4-one and Indeno-quinolin-4-one Derivatives**

*Chongguo Jiang,<sup>[a,b]</sup> Zhiling Xiong,<sup>[a,b]</sup> Shengfei Jin,<sup>[a,b]</sup> Peng Gao,<sup>[a,b]</sup> Yingzhan Tang,<sup>[a,b]</sup> Yanshi Wang,<sup>[a,b]</sup> Chuan Du,<sup>[a,b]</sup> Xiaoyu Wang,<sup>[a,b]</sup> Yang Liu,<sup>[a]</sup> Bin Lin,<sup>[a,b]</sup> and Yongxiang Liu,<sup>\*[a,b]</sup> Maosheng Cheng<sup>\*[a,b]</sup>*

[a] Key Laboratory of Structure-Based Drug Design and Discovery (Shenyang Pharmaceutical University), Ministry of Education Shenyang 110016, P. R. China

[b] Institute of Drug Research in Medicine Capital of China Benxi, 117000, P. R. China

Email: yongxiang.liu@sypu.edu.cn; mscheng@sypu.edu.cn.

## Contents

|                                                                                                               |      |
|---------------------------------------------------------------------------------------------------------------|------|
| 1. General Information.....                                                                                   | S2   |
| 2. General Procedures for the Preparation of Substrates 1a-1y, 3a-3m<br>and Characterization Data.....        | S2   |
| 3. Screening of the Reaction Conditions.....                                                                  | S24  |
| 4. Procedures for the Preparation of 1a-4, 4a-int and Characterization<br>Data.....                           | S24  |
| 5. General Procedures for the Preparation of Indeno-chromen-4-ones<br>(2a-2y) and Characterization Data.....  | S25  |
| 6. General Procedures for the Preparation of Indeno-quinolin-4-ones<br>(4a-4l) and Characterization Data..... | S36  |
| 7. The Reaction Time Determination.....                                                                       | S42  |
| 8. The Proposed Mechanism for <i>p</i> -Methoxylbenzyl Ether-type<br>Substrates.....                          | S43  |
| 9. References.....                                                                                            | S43  |
| 10. NMR Spectra.....                                                                                          | S43  |
| 11. X-Ray Crystal Structure Analysis.....                                                                     | S199 |

## 1. General Information

Unless otherwise noted, reagents were obtained commercially and used without further purification. Tetrahydrofuran (THF) was distilled from sodium under a nitrogen atmosphere. Dichloromethane (DCM) was distilled from calcium hydride under a nitrogen atmosphere. TLC analysis of reaction mixtures was performed on Dynamicadsorbents silica gel F-254 TLC plates. Flash chromatography was carried out on Zeoprep 60 (200-300 mesh) silica gel.  $^1\text{H}$  and  $^{13}\text{C}$  NMR spectra were recorded with Bruker Avance-III 600 spectrometers and referenced to  $\text{CDCl}_3$  and  $\text{DMSO-}d_6$ . HR-ESI-MS was recorded on a Bruker micro-TOFQ-Q instrument. IR spectra were recorded on a Bruker IFS 55 spectrometer. Melting points (Mp) were tested on Thomas Hoover capillary melting point apparatus.

## 2. General Procedures for the Preparation of Substrates 1a-1y, 3a-3m and Characterization Data

### 2.1 General Procedures for the Preparation of 2-Alkynyl Benzaldehydes 6a-6f

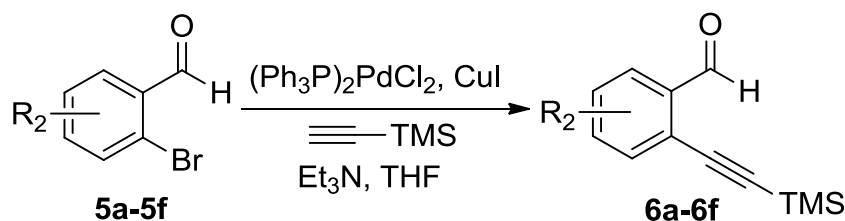

To a mixture of 2-bromobenzaldehyde **5a-5f** (10.0 mmol),  $(\text{Ph}_3\text{P})_2\text{PdCl}_2$  (0.2 mmol, 140 mg) and  $\text{CuI}$  (0.1 mmol, 19 mg) was added degassed THF (50 mL) under nitrogen atmosphere. Then ethynyl trimethylsilane (20.0 mmol, 2.8 mL) and  $\text{Et}_3\text{N}$  (20.0 mmol, 2.8 mL) were added by syringe under nitrogen atmosphere. The solution was stirred at 50 °C for 12 hours till the consumption of the starting material. The reaction mixture was filtrated through Celite after cooling to room temperature. The crude materials were purified by a flash column chromatography on silica gel to afford the products **6a-6f**.<sup>[S1, S2]</sup>

### 2.2 General Procedures for the Preparation of Acetals 7a-7j and Characterization Data

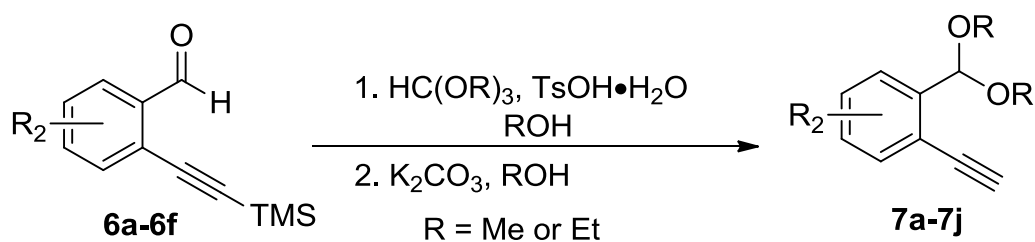

The substrates **6a-6f** (1 mmol) were dissolved in MeOH or EtOH (5 mL) before HC(OMe)<sub>3</sub> (2 mmol, 212 mg) or HC(OEt)<sub>3</sub> (2 mmol, 296 mg) and TsOH H<sub>2</sub>O (0.01 mmol, 2 mg) were added. The mixture was stirred at room temperature for 5 hours till TLC showed the consumption of the starting material. K<sub>2</sub>CO<sub>3</sub> (5 mmol, 691 mg) was added to the solution and the resulting mixture was stirred at room temperature for 5 hours till TLC showed the starting materials were completely consumed. The reaction mixture was filtrated through Celite. The filtrate was concentrated and purified by a flash column chromatography on silica gel to afford the products **7a-7j**.<sup>[S1, S2]</sup>

#### 4-Chloro-2-(diethoxymethyl)-1-ethynylbenzene (**7g**)

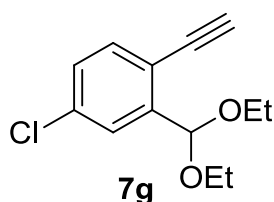

Yellow oil in 90% yield (EtOAc/petroleum ether = 1:100): <sup>1</sup>H NMR (600 MHz, CDCl<sub>3</sub>) δ 7.63 (d, *J* = 2.2 Hz, 1H), 7.40 (d, *J* = 8.2 Hz, 1H), 7.23 (dd, *J* = 8.2, 2.2 Hz, 1H), 5.75 (s, 1H), 3.66 (dq, *J* = 9.4, 7.1 Hz, 2H), 3.56 (dq, *J* = 9.4, 7.1 Hz, 2H), 3.34 (s, 1H), 1.23 (t, *J* = 7.1 Hz, 6H); <sup>13</sup>C NMR (150 MHz, CDCl<sub>3</sub>) δ 143.21, 135.15, 134.11, 128.50, 126.78, 119.35, 99.67, 82.67, 80.33, 62.52, 15.22; IR (thin film, cm<sup>-1</sup>) 3425, 3299, 2977, 2922, 2107, 1737, 1593, 1474, 1402, 1384, 1371, 1259, 1108, 1060, 897, 825, 655, 619, 561; HRMS (ESI): *m/z* Calcd. for C<sub>13</sub>H<sub>15</sub>ClO<sub>2</sub>Na [M+Na]<sup>+</sup> 261.0653, Found 261.0633.

#### 2-(Diethoxymethyl)-1-ethynyl-4-fluorobenzene (**7h**)

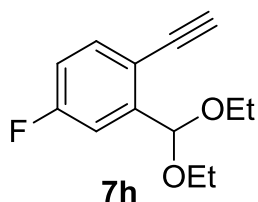

Yellow oil in 89% yield (EtOAc/petroleum ether = 1:100): <sup>1</sup>H NMR (600 MHz, CDCl<sub>3</sub>) δ 7.46 (dd, *J* = 8.5, 5.5 Hz, 1H), 7.35 (dd, *J* = 9.5, 2.7 Hz, 1H), 6.95 (td, *J* = 8.3, 2.7 Hz, 1H), 5.76 (s, 1H), 3.67 (dq, *J* = 9.2, 7.1 Hz, 2H), 3.57 (dq, *J* = 9.3, 7.1 Hz, 2H), 3.27 (s, 1H), 1.23 (t, *J* = 7.1 Hz, 6H); <sup>13</sup>C NMR (150 MHz, CDCl<sub>3</sub>) δ 162.87 (d, *J* = 249.0 Hz), 144.35 (d, *J* = 7.5 Hz), 134.83 (d, *J* = 9.0 Hz), 116.89 (d, *J* = 4.5 Hz), 115.55 (d, *J* = 22.5 Hz), 113.78 (d, *J* = 24.0 Hz), 99.70 (d, *J* = 1.5 Hz), 81.48 (d, *J* = 1.5 Hz), 80.38, 62.56, 15.20; IR (thin film, cm<sup>-1</sup>) 3432, 3304, 2978, 2929, 2881, 2108, 1607, 1488, 1270, 1156, 1061, 893, 826, 704, 655, 618, 426; HRMS (ESI): *m/z* Calcd. for C<sub>13</sub>H<sub>15</sub>FO<sub>2</sub>Na [M+Na]<sup>+</sup> 245.0948, Found 245.0948.

#### 2-(Diethoxymethyl)-1-ethynyl-4-methoxybenzene (**7i**)



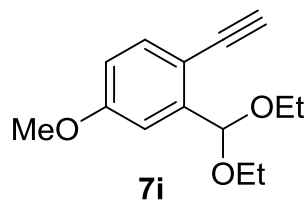

Yellow oil in 90% yield (EtOAc/petroleum ether = 1:100);  $^1\text{H}$  NMR (600 MHz,  $\text{CDCl}_3$ )  $\delta$  7.41 (d,  $J = 8.5$  Hz, 1H), 7.18 (d,  $J = 2.7$  Hz, 1H), 6.80 (dd,  $J = 8.5, 2.7$  Hz, 1H), 5.78 (s, 1H), 3.82 (s, 3H), 3.70 (dq,  $J = 9.4, 7.1$  Hz, 2H), 3.58 (dq,  $J = 9.4, 7.1$  Hz, 2H), 3.22 (s, 1H), 1.24 (t,  $J = 7.1$  Hz, 6H);  $^{13}\text{C}$  NMR (150 MHz,  $\text{CDCl}_3$ )  $\delta$  160.21, 143.28, 134.35, 114.66, 113.07, 111.21, 100.39, 81.42, 80.27, 62.75, 55.47, 15.30; IR (thin film,  $\text{cm}^{-1}$ ) 3432, 3284, 2976, 2929, 2103, 1609, 1493, 1465, 1372, 1296, 1236, 1165, 1061, 894, 824, 691, 648; HRMS (ESI):  $m/z$  Calcd. for  $\text{C}_{14}\text{H}_{18}\text{O}_3\text{Na}$   $[\text{M}+\text{Na}]^+$  257.1148, Found 257.1150.

### 2.3 General Procedures for the Preparation of 8h-8i and Characterization Data

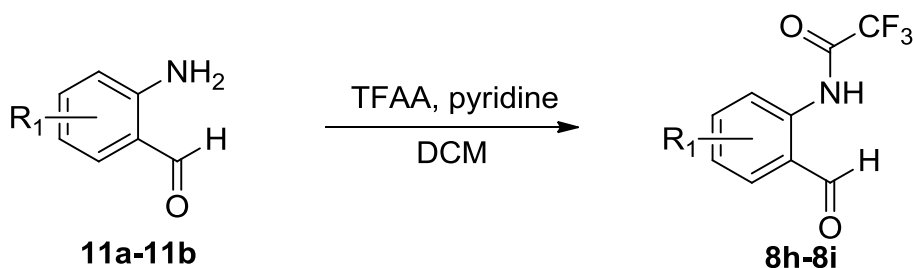

To a solution of *o*-aminobenzaldehyde (1.0 mmol) in anhydrous  $\text{CH}_2\text{Cl}_2$  (5 mL) was added TFAA (0.2 mL, 1.4 mmol), followed by dropwise addition of anhydrous pyridine (0.16 mL, 2 mmol) at 0  $^\circ\text{C}$ . The reaction mixture was warmed to rt and stirred for 5 hours. 1 M HCl (5 mL) was added to the reaction mixture, the aqueous phase was extracted with  $\text{CH}_2\text{Cl}_2$  (10 mL). The combined organic layer was washed with 1 M HCl (10 mL) and brine (10 mL), dried over anhydrous  $\text{Na}_2\text{SO}_4$ , filtered through Celite. The filtrate was concentrated and purified by a flash column chromatography on silica gel to afford the products **8h** and **8i**<sup>[S3]</sup>.

#### *N*-(4-Chloro-2-formylphenyl)-2,2,2-trifluoroacetamide (**8h**)

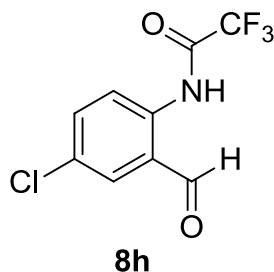

White solid in 86% yield (EtOAc/petroleum ether = 1:20): Mp 63.5–64.6  $^\circ\text{C}$ ;  $^1\text{H}$  NMR (600 MHz,  $\text{CDCl}_3$ )  $\delta$  12.05 (s, 1H), 9.92 (s, 1H), 8.66 (d,  $J = 8.9$  Hz, 1H), 7.75 (d,  $J = 2.5$  Hz, 1H), 7.66 (dd,  $J = 8.9, 2.5$  Hz, 1H);  $^{13}\text{C}$  NMR (150 MHz,  $\text{CDCl}_3$ )  $\delta$  194.51, 155.91 (q,  $J = 37.5$  Hz), 136.72, 136.29, 135.40, 130.82, 123.74, 122.14, 115.55 (q,  $J = 286.5$  Hz); IR (thin film,  $\text{cm}^{-1}$ ) 3432, 2923, 2853, 1731, 1674, 1611, 1535, 1384, 1280, 1191, 1154, 913, 887, 729, 517; HRMS (ESI):  $m/z$  Calcd. for

C<sub>9</sub>H<sub>6</sub>ClF<sub>3</sub>NO<sub>2</sub> [M+H]<sup>+</sup> 252.0034, Found 252.0033.

## 2.4 General Procedure for the Preparation of 1a-1m, 3a-3m and Characterization Data

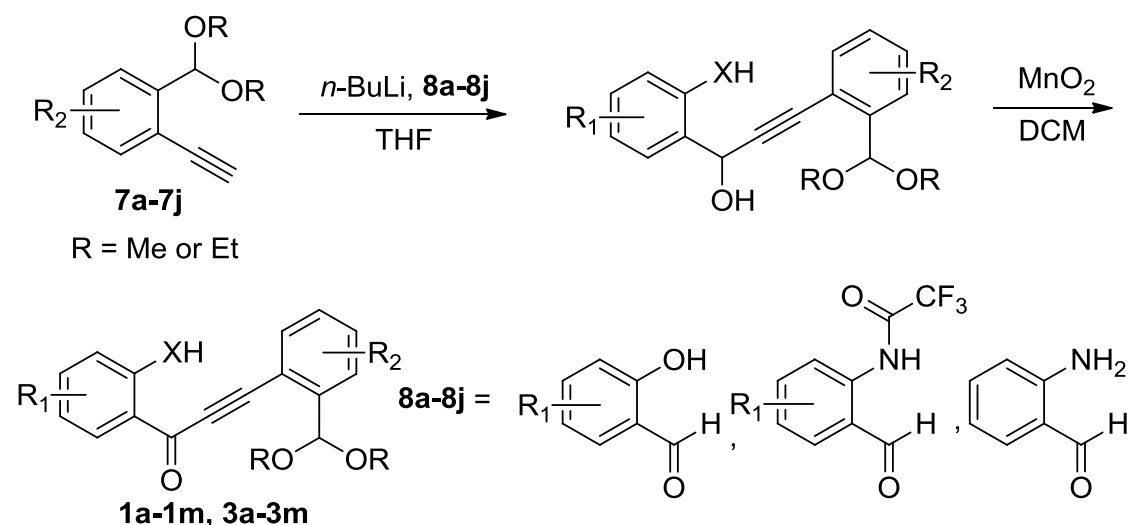

To a stirring solution of **7a-7j** (2.1 mmol) in THF (11 mL) was added a solution of *n*-BuLi (1.0 M in THF, 2.1 mL) dropwise at  $-78\text{ }^{\circ}\text{C}$  under nitrogen atmosphere. The reaction was stirred for 1 hour at  $-78\text{ }^{\circ}\text{C}$  followed by the addition of **8a-8j** (1 mmol) dropwise. After stirring at  $-78\text{ }^{\circ}\text{C}$  for 1 hour, the solution was warmed to  $0\text{ }^{\circ}\text{C}$  for another 1 hour. The reaction mixture was quenched by the addition of a saturated aqueous solution of NH<sub>4</sub>Cl. The aqueous phase was extracted with ethyl acetate. The combined organic portions were washed with H<sub>2</sub>O, saturated aqueous solution of NaCl, dried over anhydrous Na<sub>2</sub>SO<sub>4</sub>, filtered and reduced *in vacuo*.

To a solution of the residue obtained above in DCM (11 mL) was added activated MnO<sub>2</sub> (5.0 mmol, 434 mg). The mixture was stirred at room temperature overnight. The reaction mixture was filtrated through Celite. The filtrate was concentrated and purified by a flash column chromatography on silica gel to afford the products **1a-1m, 3a-3m**.

### 3-(2-(Dimethoxymethyl)phenyl)-1-(2-hydroxyphenyl)prop-2-yn-1-one (**1a**)

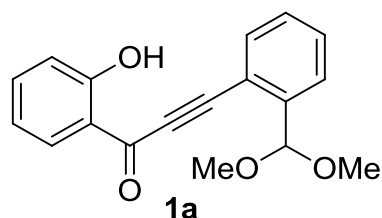

Yellow solid in 60% yield (EtOAc/petroleum ether = 1:80): Mp  $32.1\text{--}34.1\text{ }^{\circ}\text{C}$ ; <sup>1</sup>H NMR (600 MHz, CDCl<sub>3</sub>)  $\delta$  11.74 (s, 1H), 8.25 (dd,  $J = 8.1, 1.5\text{ Hz}$ , 1H), 7.74 – 7.68 (m, 2H), 7.56 – 7.50 (m, 2H), 7.41 (td,  $J = 7.6, 1.2\text{ Hz}$ , 1H), 7.00 (t,  $J = 7.7\text{ Hz}$ , 2H), 5.73 (s, 1H), 3.43 (s, 6H); <sup>13</sup>C NMR (150 MHz, CDCl<sub>3</sub>)  $\delta$  182.36, 162.92, 141.77, 137.28, 134.23, 133.37, 131.08, 128.84, 127.05, 121.11, 119.56, 118.64, 118.19, 102.05, 93.50, 90.01, 54.01; IR (thin film, cm<sup>-1</sup>) 3427, 3064, 2930, 2830, 2202, 1622, 1481, 1448, 1356, 1339, 1308, 1251, 1203, 1153, 1112, 1085, 1049, 1012, 984, 759,

690, 628; HRMS (ESI):  $m/z$  Calcd. for  $C_{18}H_{16}O_4Na$   $[M+Na]^+$  319.0941, Found 319.0937.

**3-(2-(Dimethoxymethyl)phenyl)-1-(2-hydroxy-5-methoxyphenyl)prop-2-yn-1-one (1b)**

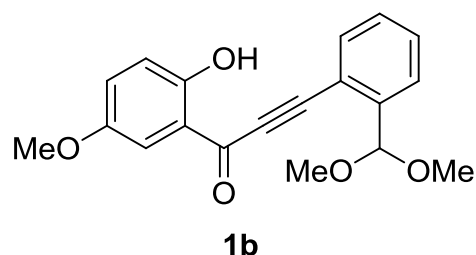

Yellow oil in 68% yield (EtOAc/petroleum ether = 1:80);  $^1H$  NMR (600 MHz,  $CDCl_3$ )  $\delta$  11.47 (s, 1H), 7.72 (dd,  $J = 9.9, 3.6$  Hz, 2H), 7.70 (d,  $J = 3.1$  Hz, 1H), 7.53 (td,  $J = 7.6, 1.1$  Hz, 1H), 7.41 (td,  $J = 7.6, 1.2$  Hz, 1H), 7.17 (dd,  $J = 9.1, 3.1$  Hz, 1H), 6.95 (d,  $J = 9.1$  Hz, 1H), 5.79 (s, 1H), 3.88 (s, 3H), 3.37 (s, 6H);  $^{13}C$  NMR (150 MHz,  $CDCl_3$ )  $\delta$  181.94, 157.74, 152.46, 141.54, 134.57, 131.06, 128.88, 127.21, 126.28, 120.53, 119.28, 118.62, 114.44, 101.36, 93.42, 90.17, 56.13, 53.34; IR (thin film,  $cm^{-1}$ ) 3427, 2929, 2199, 1592, 1484, 1358, 1253, 1173, 1053, 984, 832, 772; HRMS (ESI):  $m/z$  Calcd. for  $C_{19}H_{18}O_5Na$   $[M+Na]^+$  349.1046, Found 349.1036.

**3-(2-(Dimethoxymethyl)phenyl)-1-(5-fluoro-2-hydroxyphenyl)prop-2-yn-1-one (1c)**

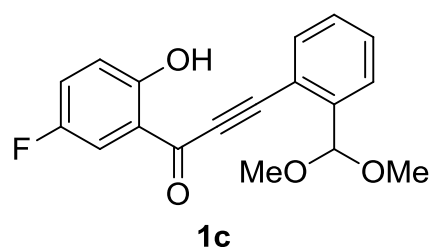

Yellow oil in 61% yield (EtOAc/petroleum ether = 1:80);  $^1H$  NMR (600 MHz,  $CDCl_3$ )  $\delta$  11.49 (s, 1H), 8.02 (dd,  $J = 8.7, 3.1$  Hz, 1H), 7.73 (d,  $J = 7.6$  Hz, 1H), 7.70 (d,  $J = 7.8$  Hz, 1H), 7.54 (td,  $J = 7.7, 0.9$  Hz, 1H), 7.42 (td,  $J = 7.6, 1.0$  Hz, 1H), 7.29 – 7.25 (m, 1H), 6.97 (dd,  $J = 9.1, 4.3$  Hz, 1H), 5.72 (s, 1H), 3.42 (s, 6H);  $^{13}C$  NMR (150 MHz,  $CDCl_3$ )  $\delta$  181.46 (d,  $J = 3.0$  Hz), 159.08, 155.38 (d,  $J = 238.5$  Hz), 141.91, 134.56, 131.28, 128.89, 127.32, 124.93 (d,  $J = 22.5$  Hz), 120.78 (d,  $J = 6.0$  Hz), 119.54 (d,  $J = 4.5$  Hz), 118.22, 117.96 (d,  $J = 24.0$  Hz), 101.93, 94.27, 89.72, 77.37, 77.16, 76.95, 53.72.; IR (thin film,  $cm^{-1}$ ) 3439, 2925, 2200, 1602, 1482, 1349, 1249, 1199, 1164, 1085, 1049, 985, 830, 790, 775, 762, 734, 692, 637, 542; HRMS (ESI):  $m/z$  Calcd. for  $C_{18}H_{15}FO_4Na$   $[M+Na]^+$  337.0847, Found 337.0853.

### 3-(2-(Dimethoxymethyl)phenyl)-1-(2-hydroxy-5-nitrophenyl)prop-2-yn-1-one (1d)

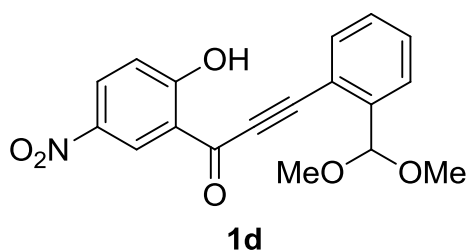

Yellow solid in 69% yield (EtOAc/petroleum ether = 1:80): Mp 85.1-87.2 °C; <sup>1</sup>H NMR (600 MHz, CDCl<sub>3</sub>) δ 12.39 (s, 1H), 9.20 (d, *J* = 2.7 Hz, 1H), 8.39 (dd, *J* = 9.2, 2.7 Hz, 1H), 7.78 (d, *J* = 7.6 Hz, 1H), 7.75 (d, *J* = 7.8 Hz, 1H), 7.57 (t, *J* = 7.5 Hz, 1H), 7.44 (t, *J* = 7.5 Hz, 1H), 7.12 (d, *J* = 9.2 Hz, 1H), 5.83 (s, 1H), 3.42 (s, 6H); <sup>13</sup>C NMR (150 MHz, CDCl<sub>3</sub>) δ 181.38, 167.29, 142.44, 140.39, 135.01, 131.78, 131.60, 129.63, 128.94, 127.47, 120.02, 119.43, 117.67, 101.30, 96.50, 89.30, 53.39; IR (thin film, cm<sup>-1</sup>) 3437, 2938, 2197, 1627, 1608, 1475, 1359, 1344, 1329, 1179, 1052, 1012, 984, 910, 857, 800, 760, 636; HRMS (ESI): *m/z* Calcd. for C<sub>18</sub>H<sub>15</sub>NO<sub>6</sub>Na [M+Na]<sup>+</sup> 364.0792, Found 364.0789.

### 3-(2-(Dimethoxymethyl)-5-methylphenyl)-1-(2-hydroxyphenyl)prop-2-yn-1-one (1e)

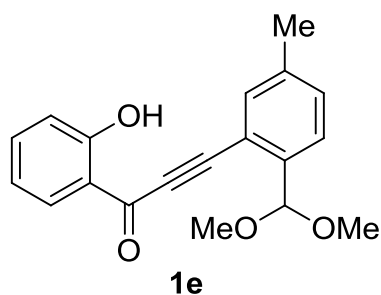

Yellow solid in 58% yield (EtOAc/petroleum ether = 1:80): Mp 71.8-73.5 °C; <sup>1</sup>H NMR (600 MHz, CDCl<sub>3</sub>) δ 11.75 (s, 1H), 8.24 (dd, *J* = 8.1, 1.3 Hz, 1H), 7.57 (d, *J* = 8.0 Hz, 1H), 7.55 - 7.51 (m, 2H), 7.33 (d, *J* = 7.9 Hz, 1H), 7.00 (t, *J* = 7.7 Hz, 2H), 5.70 (s, 1H), 3.41 (s, 6H), 2.39 (s, 3H); <sup>13</sup>C NMR (150 MHz, CDCl<sub>3</sub>) δ 182.42, 162.93, 139.00, 138.87, 137.24, 134.65, 133.40, 132.04, 127.02, 121.16, 119.56, 118.44, 118.19, 102.08, 93.93, 89.73, 53.96, 21.05; IR (thin film, cm<sup>-1</sup>) 3444, 2928, 2853, 2831, 2200, 1621, 1595, 1484, 1384, 1364, 1337, 1239, 1211, 1192, 1147, 1094, 1053, 1029, 821, 764, 739, 688; HRMS (ESI): *m/z* Calcd. for C<sub>19</sub>H<sub>18</sub>O<sub>4</sub>Na [M+Na]<sup>+</sup> 333.1097, Found 333.1103.

### 3-(2-(Dimethoxymethyl)-5-fluorophenyl)-1-(2-hydroxyphenyl)prop-2-yn-1-one (1f)

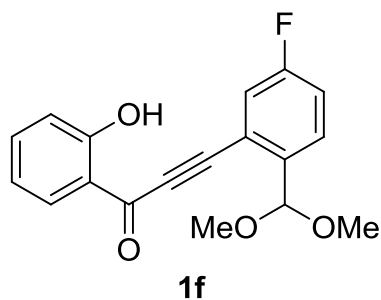

Yellow solid in 54% yield (EtOAc/petroleum ether = 1:80): Mp 59.6-60.5 °C; <sup>1</sup>H NMR (600 MHz, CDCl<sub>3</sub>) δ 11.64 (s, 1H), 8.20 (d, *J* = 8.2 Hz, 1H), 7.68 (dd, *J* = 8.6, 5.7 Hz, 1H), 7.54 (t, *J* = 7.7 Hz, 1H), 7.39 (dd, *J* = 8.5, 2.5 Hz, 1H), 7.22 (td, *J* = 8.4, 2.5 Hz, 1H), 7.05 – 6.96 (m, 2H), 5.69 (s, 1H), 3.41 (s, 6H); <sup>13</sup>C NMR (150 MHz, CDCl<sub>3</sub>) δ 182.01, 162.95, 162.11 (d, *J* = 247.5 Hz), 137.92 (d, *J* = 3.0 Hz), 137.50, 133.28, 129.18 (d, *J* = 7.5 Hz), 120.98, 120.58, 120.39 (d, *J* = 12.0 Hz), 119.65, 118.40 (d, *J* = 12.0 Hz), 118.24 (d, *J* = 4.5 Hz), 101.45, 91.44 (d, *J* = 3.0 Hz), 90.18, 53.92; IR (thin film, cm<sup>-1</sup>) 3445, 2920, 2206, 1625, 1596, 1481, 1339, 1241, 1201, 1152, 1050, 877, 827, 733, 686, 631, 529; HRMS (ESI): *m/z* Calcd. for C<sub>18</sub>H<sub>15</sub>FO<sub>4</sub>Na [M+Na]<sup>+</sup> 337.0847, Found 337.0856.

**1-(5-Chloro-2-hydroxyphenyl)-3-(2-(dimethoxymethyl)-5-methylphenyl)prop-2-yn-1-one (1g)**

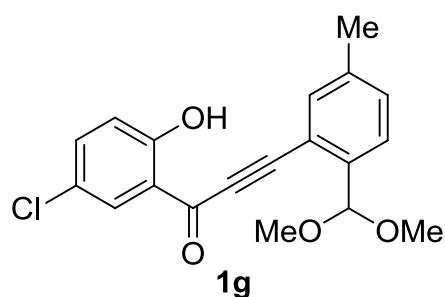

Yellow solid in 53% yield (EtOAc/petroleum ether = 1:80): Mp 129.4–130.7 °C; <sup>1</sup>H NMR (600 MHz, CDCl<sub>3</sub>) δ 11.68 (s, 1H), 8.32 (d, *J* = 2.6 Hz, 1H), 7.58 (d, *J* = 8.0 Hz, 1H), 7.54 (s, 1H), 7.47 (dd, *J* = 8.9, 2.6 Hz, 1H), 7.34 (d, *J* = 7.3 Hz, 1H), 6.96 (d, *J* = 8.9 Hz, 1H), 5.71 (s, 1H), 3.41 (s, 6H), 2.39 (s, 3H); <sup>13</sup>C NMR (150 MHz, CDCl<sub>3</sub>) δ 181.49, 161.34, 139.21, 138.93, 137.08, 135.01, 132.40, 132.26, 127.28, 124.42, 121.81, 119.83, 117.98, 101.71, 95.00, 89.44, 53.52, 21.04; IR (thin film, cm<sup>-1</sup>) 3427, 2958, 2936, 2899, 2837, 2206, 1629, 1593, 1474, 1403, 1362, 1333, 1201, 1096, 1053, 1030, 981, 906, 842, 819, 783, 741, 646, 531; HRMS (ESI): *m/z* Calcd. for C<sub>19</sub>H<sub>17</sub>ClO<sub>4</sub>Na [M+Na]<sup>+</sup> 367.0708, Found 367.0709.

**3-(2-(Dimethoxymethyl)-4-methoxyphenyl)-1-(2-hydroxyphenyl)prop-2-yn-1-one (1h)**

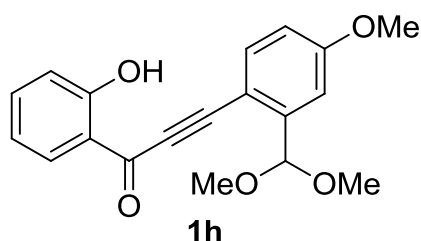

Yellow solid in 64% yield (EtOAc/petroleum ether = 1:80): Mp 71.1–73.2 °C; <sup>1</sup>H NMR (600 MHz, CDCl<sub>3</sub>) δ 11.82 (s, 1H), 8.23 (dd, *J* = 8.0, 1.4 Hz, 1H), 7.66 (d, *J* = 8.5 Hz, 1H), 7.54–7.50 (m, 1H), 7.23 (d, *J* = 2.6 Hz, 1H), 6.99 (t, *J* = 7.8 Hz, 2H), 6.92 (dd, *J* = 8.5, 2.7 Hz, 1H), 5.71 (s, 1H), 3.89 (s, 3H), 3.44 (s, 6H); <sup>13</sup>C NMR (150 MHz, CDCl<sub>3</sub>) δ 182.45, 162.89, 162.17, 144.32, 137.05, 136.25, 133.30, 121.18, 119.48, 118.19, 115.09, 112.41, 110.43, 101.99, 94.81, 89.94, 55.77, 54.23; IR (thin film, cm<sup>-1</sup>) 3060, 2985, 2941, 2838, 2580, 2183, 1590, 1560, 1481, 1447, 1429, 1358, 1337, 1301, 1277, 1235, 1196, 1050, 1007, 885, 811, 756, 612, 526; HRMS (ESI): *m/z* Calcd. for C<sub>19</sub>H<sub>18</sub>O<sub>5</sub>Na [M+Na]<sup>+</sup> 349.1046, Found 349.1050.

**3-(4-Chloro-2-(dimethoxymethyl)phenyl)-1-(2-hydroxyphenyl)prop-2-yn-1-one**  
**(1i)**

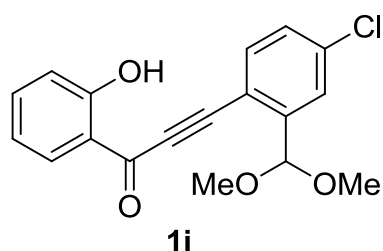

Yellow solid in 56% yield (EtOAc/petroleum ether = 1:80): Mp 68.6–70.1 °C; <sup>1</sup>H NMR (600 MHz, CDCl<sub>3</sub>) δ 11.68 (s, 1H), 8.21 (dd, *J* = 7.9, 1.6 Hz, 1H), 7.71 (d, *J* = 2.1 Hz, 1H), 7.64 (d, *J* = 8.2 Hz, 1H), 7.56–7.51 (m, 1H), 7.39 (dd, *J* = 8.2, 2.2 Hz, 1H), 7.04–6.96 (m, 2H), 5.69 (s, 1H), 3.42 (s, 6H); <sup>13</sup>C NMR (150 MHz, CDCl<sub>3</sub>) δ 182.16, 162.98, 143.58, 137.73, 137.45, 135.32, 133.31, 129.22, 127.77, 121.06, 119.64, 118.28, 117.08, 101.21, 92.17, 90.64, 53.95; IR (thin film, cm<sup>-1</sup>) 3443, 2925, 2853, 2202, 1619, 1588, 1479, 1452, 1384, 1355, 1339, 1206, 1189, 1105, 1053, 1012, 880, 818, 800, 758; HRMS (ESI): *m/z* Calcd. for C<sub>18</sub>H<sub>15</sub>ClO<sub>4</sub> [M+H]<sup>+</sup> 331.0732, Found 331.0732.

**3-(2-(Dimethoxymethyl)-4-fluorophenyl)-1-(2-hydroxyphenyl)prop-2-yn-1-one**  
**(1j)**

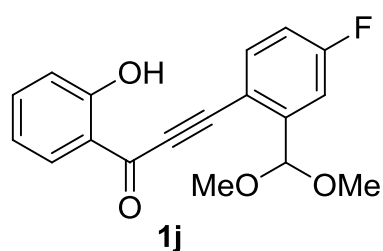

Yellow solid in 65% yield (EtOAc/petroleum ether = 1:80): Mp 133.3–134.7 °C; <sup>1</sup>H NMR (600 MHz, CDCl<sub>3</sub>) δ 11.70 (s, 1H), 8.22 (dd, *J* = 8.0, 1.5 Hz, 1H), 7.71 (dd, *J* = 8.5, 5.4 Hz, 1H), 7.55–7.51 (m, 1H), 7.43 (dd, *J* = 9.4, 2.7 Hz, 1H), 7.10 (td, *J* = 8.2, 2.7 Hz, 1H), 7.02–6.96 (m, 2H), 5.71 (s, 1H), 3.42 (s, 6H); <sup>13</sup>C NMR (150 MHz, CDCl<sub>3</sub>) δ 182.22, 164.19 (d, *J* = 164.2 Hz), 162.93, 145.13 (d, *J* = 7.5 Hz), 137.34, 136.43 (d, *J* = 9.0 Hz), 133.27, 121.04, 119.58, 118.23, 116.31 (d, *J* = 22.5 Hz), 114.99 (d, *J* = 24.0 Hz), 114.64 (d, *J* = 3.0 Hz), 101.09 (d, *J* = 12.0 Hz), 92.44, 89.90 (d, *J* = 1.5 Hz), 53.91; IR (thin film, cm<sup>-1</sup>) 3443, 2922, 2852, 2201, 1649, 1621, 1594, 1478, 1384, 1259, 1183, 1150, 1112, 1048, 1011, 875, 761, 726, 614, 527; HRMS (ESI): *m/z* Calcd. for C<sub>17</sub>H<sub>12</sub>FO<sub>3</sub> [M+H]<sup>+</sup> 315.1027, Found 315.1036.

**3-(2-(Dimethoxymethyl)phenyl)-1-(2-hydroxy-4-methoxyphenyl)prop-2-yn-1-one (1k)**

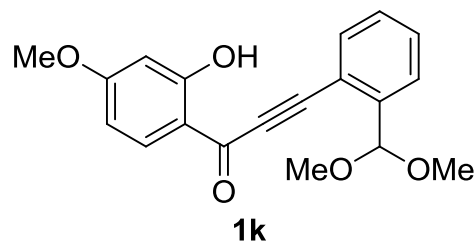

Yellow solid in 62% yield (EtOAc/petroleum ether = 1:80): Mp 75.8–77.1 °C; <sup>1</sup>H NMR (600 MHz, CDCl<sub>3</sub>) δ 12.22 (s, 1H), 8.12 (d, *J* = 8.9 Hz, 1H), 7.71 – 7.67 (m, 2H), 7.51 (t, *J* = 7.6 Hz, 1H), 7.40 (td, *J* = 7.6, 0.9 Hz, 1H), 6.53 (dd, *J* = 8.9, 2.4 Hz, 1H), 6.44 (d, *J* = 2.4 Hz, 1H), 5.72 (s, 1H), 3.87 (s, 3H), 3.42 (s, 6H); <sup>13</sup>C NMR (150 MHz, CDCl<sub>3</sub>) δ 180.42, 167.18, 165.89, 141.59, 135.05, 134.07, 130.86, 128.83, 126.99, 118.96, 115.66, 108.65, 102.13, 100.70, 92.66, 90.01, 55.90, 54.09; IR (thin film, cm<sup>-1</sup>) 3441, 2922, 2852, 2202, 1632, 1588, 1507, 1448, 1384, 1354, 1269, 1126, 1114, 1052, 763, 683, 611; HRMS (ESI): *m/z* Calcd. for C<sub>19</sub>H<sub>18</sub>O<sub>5</sub>Na [M+Na]<sup>+</sup> 349.1046, Found 349.1038.

**3-(2-(Dimethoxymethyl)phenyl)-1-(2-hydroxy-3,5-dimethylphenyl)prop-2-yn-1-one (1l)**

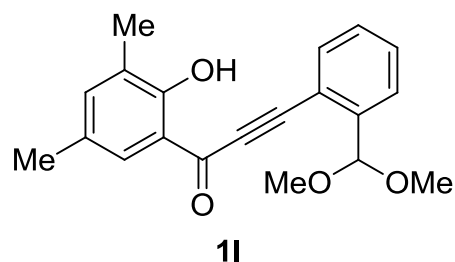

Yellow solid in 61% yield (EtOAc/petroleum ether = 1:80): Mp 59.3–61.3 °C; <sup>1</sup>H NMR (600 MHz, CDCl<sub>3</sub>) δ 11.85 (s, 1H), 7.93 (d, *J* = 0.7 Hz, 1H), 7.72 (dd, *J* = 2.5, 0.8 Hz, 1H), 7.70 (dd, *J* = 2.8, 0.8 Hz, 1H), 7.52 (td, *J* = 7.7, 1.1 Hz, 1H), 7.41 (td, *J* = 7.6, 1.2 Hz, 1H), 7.23 (d, *J* = 0.5 Hz, 1H), 5.79 (s, 1H), 3.41 (s, 6H), 2.33 (s, 3H), 2.26 (s, 3H); <sup>13</sup>C NMR (150 MHz, CDCl<sub>3</sub>) δ 182.46, 159.43, 141.65, 139.45, 134.25, 130.92, 130.56, 128.84, 128.11, 127.07, 126.95, 120.22, 118.90, 101.71, 92.86, 90.43, 53.68, 20.43, 15.39; IR (thin film, cm<sup>-1</sup>) 3427, 2956, 2921, 2854, 2203, 1622, 1588, 1469, 1383, 1356, 1294, 1253, 1221, 1095, 1051, 976, 783, 752, 612; HRMS (ESI): *m/z* Calcd. for C<sub>20</sub>H<sub>20</sub>O<sub>4</sub>Na [M+Na]<sup>+</sup> 347.1254, Found 347.1253.

**3-(2-(Diethoxymethyl)phenyl)-1-(2-hydroxyphenyl)prop-2-yn-1-one (1m)**

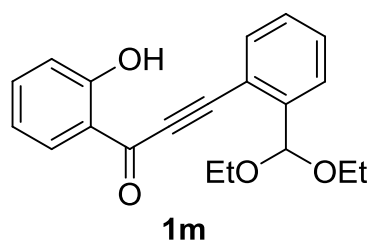

Yellow solid in 55% yield (EtOAc/petroleum ether = 1:80): Mp 59.3–61.5 °C; <sup>1</sup>H NMR (600 MHz, CDCl<sub>3</sub>) δ 11.74 (s, 1H), 8.28 (dd, *J* = 8.0, 1.6 Hz, 1H), 7.77 – 7.67 (m, 2H), 7.56 – 7.50 (m, 2H), 7.39 (td, *J* = 7.6, 1.1 Hz, 1H), 7.03 – 6.96 (m, 2H), 5.84 (s, 1H), 3.72 (dq, *J* = 9.3, 7.1 Hz, 2H), 3.62 (dq, *J* = 9.3, 7.0 Hz, 2H), 1.26 (t, *J* = 7.1 Hz, 6H); <sup>13</sup>C NMR (150 MHz, CDCl<sub>3</sub>) δ 182.42, 162.92, 142.90, 137.30, 134.14, 133.51, 131.23, 128.69, 126.97, 121.14, 119.52, 118.59, 118.20, 100.31, 93.75, 89.98, 62.57, 15.34; IR (thin film, cm<sup>-1</sup>) 3406, 3070, 3051, 2971, 2928, 2891, 2202, 1624, 1592, 1487, 1443, 1360, 1341, 1309, 1249, 1155, 1058, 1012, 799, 764, 748, 689, 630, 528; HRMS (ESI): *m/z* Calcd. for C<sub>20</sub>H<sub>20</sub>O<sub>4</sub>Na [M+Na]<sup>+</sup> 347.1254, Found 347.1264.

***N*-(2-(3-(2-(Dimethoxymethyl)phenyl)propioloyl)phenyl)-2,2,2-trifluoroacetamide (3a)**

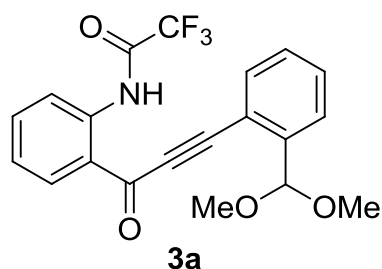

Yellow solid in 52% yield (EtOAc/petroleum ether = 1:70): Mp 83.6–84.6 °C; <sup>1</sup>H NMR (600 MHz, CDCl<sub>3</sub>) δ 12.68 (s, 1H), 8.72 (dd, *J* = 8.4, 0.6 Hz, 1H), 8.62 (dd, *J* = 7.9, 1.5 Hz, 1H), 7.71 (tdd, *J* = 6.3, 5.3, 1.3 Hz, 3H), 7.54 (td, *J* = 7.7, 1.2 Hz, 1H), 7.42 (td, *J* = 7.6, 1.2 Hz, 1H), 7.39 – 7.36 (m, 1H), 5.72 (s, 1H), 3.42 (s, 6H); <sup>13</sup>C NMR (150 MHz, CDCl<sub>3</sub>) δ 181.23, 155.88 (q, *J* = 37.5 Hz), 141.96, 139.25, 136.36, 135.21, 134.45, 131.35, 128.93, 127.27, 124.99, 123.39, 120.82, 118.34, 115.76 (d, *J* = 286.5 Hz), 101.93, 93.79, 90.90, 53.87; IR (thin film, cm<sup>-1</sup>) 3440, 3120, 2919, 2850, 2198, 1741, 1616, 1597, 1530, 1451, 1322, 1273, 1198, 1155, 1116, 1056, 1013, 903, 758, 634, 511; HRMS (ESI): *m/z* Calcd. for C<sub>20</sub>H<sub>16</sub>F<sub>3</sub>NO<sub>4</sub>Na [M+Na]<sup>+</sup> 414.0924, Found 414.0920.

***N*-(2-(3-(2-(Dimethoxymethyl)-5-methylphenyl)propioloyl)phenyl)-2,2,2-trifluoroacetamide (3b)**

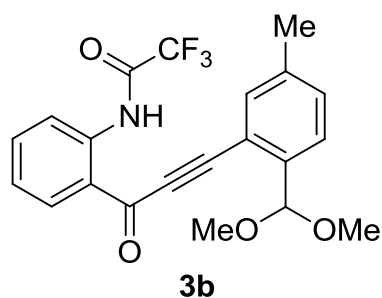

Yellow solid in 56% yield (EtOAc/petroleum ether = 1:70): Mp 121.4–123.1 °C; <sup>1</sup>H NMR (600 MHz, CDCl<sub>3</sub>) δ 12.70 (s, 1H), 8.72 (d, *J* = 7.9 Hz, 1H), 8.61 (dd, *J* = 7.9, 1.5 Hz, 1H), 7.73 – 7.68 (m, 1H), 7.58 (d, *J* = 8.0 Hz, 1H), 7.54 (s, 1H), 7.40 – 7.36 (m, 1H), 7.35 (d, *J* = 8.0 Hz, 1H), 5.69 (s, 1H), 3.40 (s, 6H), 2.40 (s, 3H); <sup>13</sup>C NMR (150 MHz, CDCl<sub>3</sub>) δ 181.25, 155.89 (q, *J* = 37.5 Hz), 139.25, 139.17, 138.97, 136.30, 135.21, 134.85, 132.28, 127.22, 124.99, 123.43, 120.82, 118.13, 115.77 (d, *J* = 286.5 Hz), 101.95, 94.21, 90.62, 53.80, 21.06; IR (thin film, cm<sup>-1</sup>) 3434, 3113, 2920,



2851, 2197, 1739, 1618, 1599, 1534, 1453, 1324, 1278, 1239, 1192, 1157, 1117, 1093, 1054, HRMS (ESI):  $m/z$  Calcd. for  $C_{21}H_{18}F_3NO_4Na$   $[M+Na]^+$  428.1080, Found 428.1098.

***N*-2-(3-(2-(Dimethoxymethyl)-4-methoxyphenyl)propioloyl)phenyl)-2,2,2-trifluoroacetamide (3c)**

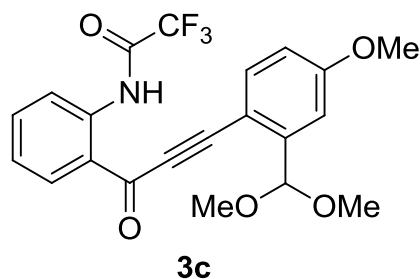

Yellow solid in 54% yield (EtOAc/petroleum ether = 1:70): Mp 116.4–117.9 °C;  $^1H$  NMR (600 MHz,  $CDCl_3$ )  $\delta$  12.76 (s, 1H), 8.70 (d,  $J = 7.9$  Hz, 1H), 8.60 (dd,  $J = 7.9, 1.5$  Hz, 1H), 7.73 – 7.63 (m, 2H), 7.39 – 7.33 (m, 1H), 7.23 (d,  $J = 2.6$  Hz, 1H), 6.92 (dd,  $J = 8.5, 2.7$  Hz, 1H), 5.70 (s, 1H), 3.89 (s, 3H), 3.43 (s, 6H);  $^{13}C$  NMR (150 MHz,  $CDCl_3$ )  $\delta$  181.16, 162.34, 155.78 (q,  $J = 37.5$  Hz), 144.50, 139.13, 136.49, 136.01, 135.01, 124.89, 123.45, 120.71, 115.76 (d,  $J = 286.5$  Hz), 114.98, 112.71, 109.97, 101.71, 95.21, 90.97, 55.73, 53.92; IR (thin film,  $cm^{-1}$ ) 3429, 2920, 2850, 2192, 1729, 1592, 1534, 1452, 1384, 1279, 1236, 1168, 1118, 1062, 1012, 903, 872, 781, 760, 619, 531; HRMS (ESI):  $m/z$  Calcd. for  $C_{21}H_{18}F_3NO_5Na$   $[M+Na]^+$  444.1029, Found 444.1025.

***N*-2-(3-(2-(Dimethoxymethyl)-4-fluorophenyl)propioloyl)phenyl)-2,2,2-trifluoroacetamide (3d)**

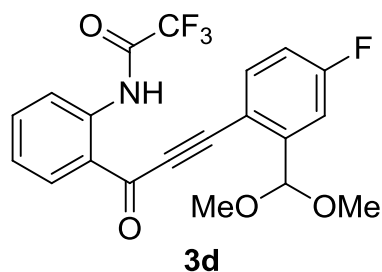

Yellow solid in 57% yield (EtOAc/petroleum ether = 1:70): Mp 126.1–127.2 °C;  $^1H$  NMR (600 MHz,  $CDCl_3$ )  $\delta$  12.65 (s, 1H), 8.74 – 8.70 (m, 1H), 8.58 (dd,  $J = 7.9, 1.5$  Hz, 1H), 7.71 (td,  $J = 8.5, 3.4$  Hz, 2H), 7.44 (dd,  $J = 9.4, 2.7$  Hz, 1H), 7.39 – 7.35 (m, 1H), 7.12 (td,  $J = 8.2, 2.7$  Hz, 1H), 5.70 (s, 1H), 3.41 (s, 6H);  $^{13}C$  NMR (150 MHz,  $CDCl_3$ )  $\delta$  181.10, 164.36 (d,  $J = 254.0$  Hz), 155.89 (dd,  $J = 37.5$  Hz, 75.2 Hz), 145.36 (d,  $J = 7.5$  Hz), 139.28, 136.67 (d,  $J = 8.9$  Hz), 136.42, 135.12, 124.99, 123.32, 120.87, 116.42 (d,  $J = 22.5$  Hz), 115.75 (d,  $J = 288.0$  Hz), 115.24 (d,  $J = 23.9$  Hz), 114.36 (d,  $J = 3.5$  Hz), 100.95 (d,  $J = 0.9$  Hz), 92.74, 90.8 (d,  $J = 1.2$  Hz), 53.77; IR (thin film,  $cm^{-1}$ ) 3429, 2919, 2851, 2196, 1741, 1617, 1597, 1534, 1452, 1384, 1275, 1224, 1154, 1118, 1056, 1015, 882, 758, 618, 515; HRMS (ESI):  $m/z$  Calcd. for  $C_{20}H_{15}F_4NO_4Na$   $[M+Na]^+$  432.0829, Found 432.0828.

***N*-2-(3-(4-Chloro-2-(dimethoxymethyl)phenyl)propioloyl)phenyl)-2,2,2-trifluoroacetamide (3e)**

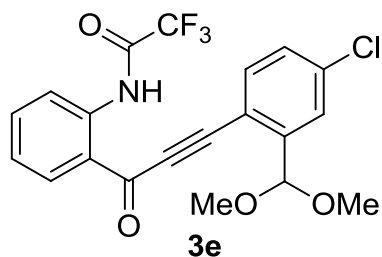

Yellow solid in 59% yield (EtOAc/petroleum ether = 1:70): Mp 149.3– 150.1 °C; <sup>1</sup>H NMR (600 MHz, CDCl<sub>3</sub>) δ 12.62 (s, 1H), 8.74 – 8.70 (m, 1H), 8.57 (dd, *J* = 7.9, 1.5 Hz, 1H), 7.74 – 7.69 (m, 2H), 7.65 (d, *J* = 8.2 Hz, 1H), 7.42 – 7.35 (m, 2H), 5.68 (s, 1H), 3.41 (s, 6H); <sup>13</sup>C NMR (150 MHz, CDCl<sub>3</sub>) δ 181.02, 155.89 (q, *J* = 37.5 Hz), 143.74, 139.28, 138.01, 136.49, 135.49, 135.14, 129.27, 127.95, 125.01, 123.29, 120.87, 116.75, 115.74 (d, *J* = 286.5 Hz), 101.04, 92.41, 91.49, 53.77; IR (thin film, cm<sup>-1</sup>) 3430, 2920, 2851, 2204, 1734, 1630, 1597, 1525, 1465, 1323, 1280, 1191, 1158, 1132, 1117, 1055, 1018, 906, 761, 618, 516; HRMS (ESI): *m/z* Calcd. for C<sub>20</sub>H<sub>15</sub>ClF<sub>3</sub>NO<sub>4</sub>Na [M+Na]<sup>+</sup> 448.0534, Found 448.0527.

***N*-(4-Chloro-2-(3-(2-(dimethoxymethyl)phenyl)propioloyl)phenyl)-2,2,2-trifluoroacetamide (3f)**

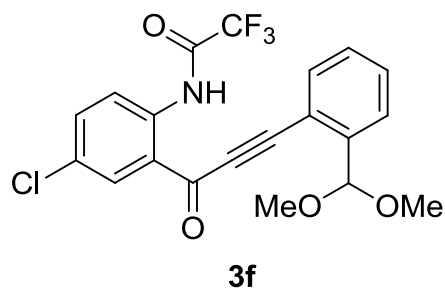

Yellow solid in 53% yield (EtOAc/petroleum ether = 1:70): Mp 126.6–127.9 °C; <sup>1</sup>H NMR (600 MHz, CDCl<sub>3</sub>) δ 12.57 (s, 1H), 8.68 (dd, *J* = 5.7, 3.1 Hz, 2H), 7.72 (t, *J* = 6.9 Hz, 2H), 7.64 (dd, *J* = 9.0, 2.4 Hz, 1H), 7.57 – 7.53 (m, 1H), 7.45 – 7.40 (m, 1H), 5.73 (s, 1H), 3.41 (s, 6H); <sup>13</sup>C NMR (150 MHz, CDCl<sub>3</sub>) δ 180.14, 155.84 (q, *J* = 37.5 Hz), 142.15, 137.62, 136.00, 134.88, 134.60, 131.58, 130.51, 128.97, 127.52, 124.63, 122.21, 117.88, 115.66 (d, *J* = 288.0 Hz), 101.46, 94.76, 90.64, 53.34; IR (thin film, cm<sup>-1</sup>) 3422, 2910, 2861, 1621, 1581, 1526, 1465, 1382, 1339, 1278, 1121, 881, 769, 620, 518; HRMS (ESI): *m/z* Calcd. for C<sub>20</sub>H<sub>15</sub>ClF<sub>3</sub>NO<sub>4</sub>Na [M+Na]<sup>+</sup> 448.0534, Found 448.0537.

***N*-(4-Chloro-2-(3-(2-(dimethoxymethyl)-4-methoxyphenyl)propioloyl)phenyl)-2,2,2-trifluoroacetamide (3g)**

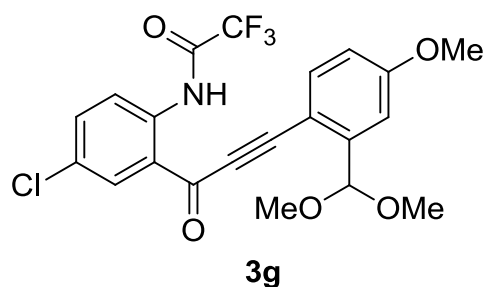

Yellow solid in 56% yield (EtOAc/petroleum ether = 1:70): Mp 152.9–153.8 °C; <sup>1</sup>H NMR (600 MHz, CDCl<sub>3</sub>) δ 12.67 (s, 1H), 8.68 (t, *J* = 5.3 Hz, 2H), 7.68 (d, *J* = 8.5 Hz, 1H), 7.63 (dd, *J* = 8.9, 2.5 Hz, 1H), 7.25 (d, *J* = 2.6 Hz, 1H), 6.93 (dd, *J* = 8.5, 2.7 Hz, 1H), 5.72 (s, 1H), 3.90 (s, 3H), 3.42 (s, 6H); <sup>13</sup>C NMR (150 MHz, CDCl<sub>3</sub>) δ 180.06, 162.56, 155.84 (q, *J* = 37.5 Hz), 144.75, 137.56, 136.99, 135.70, 134.46, 130.42, 124.77, 122.18, 115.69 (d, *J* = 288.0 Hz), 114.96, 113.12, 109.56, 101.22, 96.34, 90.88, 55.81, 53.44; IR (thin film, cm<sup>-1</sup>) 3434, 3081, 2959, 2920, 2851, 2180, 1730, 1594, 1526, 1435, 1384, 1280, 1230, 1193, 1157, 1091, 1062, 1013, 989, 884, 848, 738, 617; HRMS (ESI): *m/z* Calcd. for C<sub>21</sub>H<sub>17</sub>ClF<sub>3</sub>NO<sub>5</sub>Na [M+Na]<sup>+</sup> 478.0640, Found 478.0641.

***N*-(2-(3-(2-(Diethoxymethyl)-4-methoxyphenyl)propioloyl)phenyl)-2,2,2-trifluoroacetamide (3h)**

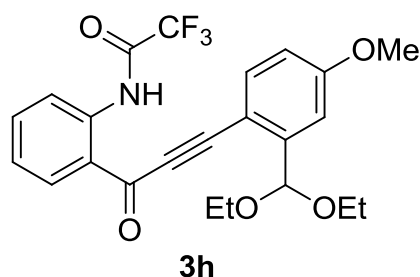

Yellow solid in 58% yield (EtOAc/petroleum ether = 1:70): Mp 96.8–97.7 °C; <sup>1</sup>H NMR (600 MHz, CDCl<sub>3</sub>) δ 12.78 (s, 1H), 8.70 (d, *J* = 8.3 Hz, 1H), 8.64 (dd, *J* = 7.9, 1.5 Hz, 1H), 7.71 – 7.67 (m, 1H), 7.65 (d, *J* = 8.5 Hz, 1H), 7.37 – 7.33 (m, 1H), 7.28 (d, *J* = 2.6 Hz, 1H), 6.91 (dd, *J* = 8.5, 2.7 Hz, 1H), 5.80 (s, 1H), 3.89 (s, 3H), 3.76 – 3.68 (m, 2H), 3.67 – 3.59 (m, 2H), 1.26 (t, *J* = 7.0 Hz, 6H); <sup>13</sup>C NMR (150 MHz, CDCl<sub>3</sub>) δ 181.21, 162.46, 155.85 (q, *J* = 37.5 Hz), 145.63, 139.16, 136.45, 136.05, 135.16, 124.85, 123.51, 120.76, 115.82 (d, *J* = 274.5 Hz), 114.80, 112.67, 110.00, 100.05, 95.41, 90.98, 62.54, 55.75, 15.35; IR (thin film, cm<sup>-1</sup>) 3424, 3087, 2974, 2920, 2850, 2190, 1734, 1596, 1534, 1455, 1384, 1303, 1280, 1230, 1195, 1164, 1120, 1054, 1030, 1010, 890, 808, 761, 617; HRMS (ESI): *m/z* Calcd. for C<sub>23</sub>H<sub>22</sub>F<sub>3</sub>NO<sub>5</sub>Na [M+Na]<sup>+</sup> 427.1342, Found 427.1346.

***N*-(2-(3-(2-(Diethoxymethyl)phenyl)propioloyl)phenyl)-2,2,2-trifluoroacetamide (3i)**

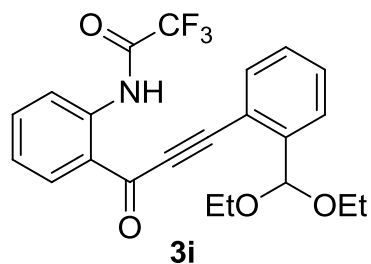

Yellow solid in 56% yield (EtOAc/petroleum ether = 1:70): Mp 104.1–105.4 °C; <sup>1</sup>H NMR (600 MHz, CDCl<sub>3</sub>) δ 12.69 (s, 1H), 8.72 (d, *J* = 8.4 Hz, 1H), 8.67 (dd, *J* = 7.9, 1.4 Hz, 1H), 7.75 (d, *J* = 7.8 Hz, 1H), 7.73 – 7.68 (m, 2H), 7.54 (td, *J* = 7.7, 0.8 Hz, 1H), 7.40 (t, *J* = 7.5 Hz, 1H), 7.36 (t, *J* = 7.6 Hz, 1H), 5.83 (s, 1H), 3.75 – 3.66 (m, 2H), 3.65 – 3.57 (m, 2H), 1.25 (t, *J* = 7.1 Hz, 6H); <sup>13</sup>C NMR (150 MHz, CDCl<sub>3</sub>) δ 181.26, 155.89 (q, *J* = 37.5 Hz), 143.05, 139.25, 136.34, 135.36, 134.38, 131.44, 128.75, 127.18, 124.93, 123.42, 120.81, 118.29, 115.77 (d, *J* = 286.5 Hz), 100.18, 94.00, 90.88, 62.33, 15.35; IR (thin film, cm<sup>-1</sup>) 3435, 2920, 2851, 2199, 1736, 1623, 1597, 1534, 1453, 1384,

1278, 1160, 1120, 1056, 764, 619; HRMS (ESI):  $m/z$  Calcd. for  $C_{22}H_{20}F_3NO_4Na$   $[M+Na]^+$  442.1237, Found 442.1253.

***N*-(2-(3-(2-(Diethoxymethyl)-4-fluorophenyl)propioloyl)phenyl)-2,2,2-trifluoroacetamide (3j)**

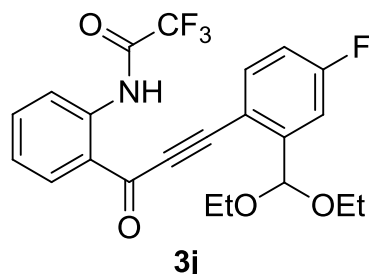

Yellow solid in 59% yield (EtOAc/petroleum ether = 1:70): Mp 141.7–143.2 °C;  $^1H$  NMR (600 MHz,  $CDCl_3$ )  $\delta$  12.66 (s, 1H), 8.71 (d,  $J = 8.4$  Hz, 1H), 8.64 (dd,  $J = 7.9, 1.5$  Hz, 1H), 7.71 (dd,  $J = 8.4, 5.7$  Hz, 2H), 7.48 (dd,  $J = 9.4, 2.6$  Hz, 1H), 7.38 – 7.34 (m, 1H), 7.10 (td,  $J = 8.2, 2.7$  Hz, 1H), 5.81 (s, 1H), 3.72 – 3.59 (m, 4H), 1.26 (t,  $J = 7.0$  Hz, 6H);  $^{13}C$  NMR (150 MHz,  $CDCl_3$ )  $\delta$  181.11, 164.5 (d,  $J = 255.0$  Hz), 155.86 (dd,  $J = 37.5, 75.0$  Hz), 146.45 (d,  $J = 7.5$  Hz), 139.24, 136.60 (d,  $J = 7.5$  Hz), 136.38, 135.25, 124.93, 123.33, 120.81, 116.22 (d,  $J = 22.5$  Hz), 115.75 (d,  $J = 286.5$  Hz), 115.07 (d,  $J = 24.0$  Hz), 114.27 (d,  $J = 1.5$  Hz), 99.26 (d,  $J = 0.75$  Hz), 92.93, 90.78 (d,  $J = 1.2$  Hz), 62.29, 15.30; IR (thin film,  $cm^{-1}$ ) 3432, 3081, 2979, 2920, 2200, 1731, 1599, 1535, 1453, 1277, 1219, 1158, 1053, 1012, 892, 838, 761, 619; HRMS (ESI):  $m/z$  Calcd. for  $C_{22}H_{19}F_4NO_4Na$   $[M+Na]^+$  460.1142, Found 460.1141.

***N*-(4-Chloro-2-(3-(4-chloro-2-(diethoxymethyl)phenyl)propioloyl)phenyl)-2,2,2-trifluoroacetamide (3k)**

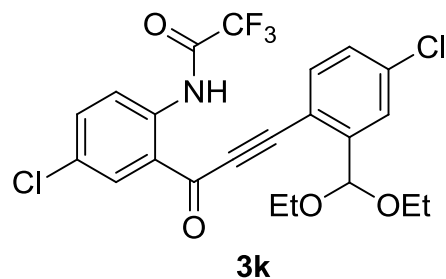

Yellow solid in 57% yield (EtOAc/petroleum ether = 1:70): Mp 102.7–104.4 °C;  $^1H$  NMR (600 MHz,  $CDCl_3$ )  $\delta$  12.55 (s, 1H), 8.69 (t,  $J = 5.6$  Hz, 2H), 7.76 (d,  $J = 2.2$  Hz, 1H), 7.66 (d,  $J = 2.5$  Hz, 1H), 7.65 (d,  $J = 1.9$  Hz, 1H), 7.40 (dd,  $J = 8.2, 2.2$  Hz, 1H), 5.82 (s, 1H), 3.71 – 3.60 (m, 4H), 1.26 (t,  $J = 7.1$  Hz, 6H);  $^{13}C$  NMR (150 MHz,  $CDCl_3$ )  $\delta$  179.95, 155.85 (q,  $J = 37.5$  Hz), 145.15, 138.44, 137.67, 136.15, 135.96, 134.45, 130.56, 129.15, 128.06, 124.53, 122.27, 116.26, 115.66 (d,  $J = 286.5$  Hz), 98.94, 93.64, 91.28, 61.91, 15.30; IR (thin film,  $cm^{-1}$ ) 3435, 3078, 2978, 2920, 2851, 2199, 1735, 1622, 1597, 1532, 1452, 1277, 1209, 1159, 1120, 1056, 1015, 904, 765, 731, 683, 633; HRMS (ESI):  $m/z$  Calcd. for  $C_{22}H_{18}Cl_2F_3NO_4Na$   $[M+Na]^+$  510.0457, Found 510.0462.

***N*-(4-Chloro-2-(3-(2-(diethoxymethyl)-4-methoxyphenyl)propioloyl)phenyl)-2,2,2-trifluoroacetamide (3l)**

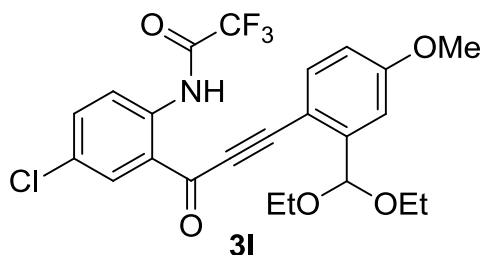

Yellow solid in 52% yield (EtOAc/petroleum ether = 1:70): Mp 118.7–119.5 °C; <sup>1</sup>H NMR (600 MHz, CDCl<sub>3</sub>) δ 12.70 (s, 1H), 8.69 (dd, *J* = 7.5, 5.7 Hz, 2H), 7.68 (d, *J* = 8.5 Hz, 1H), 7.63 (dd, *J* = 8.9, 2.5 Hz, 1H), 7.29 (d, *J* = 2.6 Hz, 1H), 6.92 (dd, *J* = 8.5, 2.7 Hz, 1H), 5.83 (s, 1H), 3.90 (s, 3H), 3.75 – 3.61 (m, 4H), 1.25 (t, *J* = 7.1 Hz, 6H); <sup>13</sup>C NMR (150 MHz, CDCl<sub>3</sub>) δ 180.04, 162.70, 155.83 (q, *J* = 37.5 Hz), 145.98, 137.57, 137.05, 135.71, 134.36, 130.43, 124.75, 122.20, 115.70 (d, *J* = 286.5 Hz), 114.71, 113.07, 109.53, 99.63, 96.68, 90.98, 62.14, 55.79, 15.34; IR (thin film, cm<sup>-1</sup>) 3428, 2920, 2851, 2191, 1723, 1619, 1593, 1524, 1460, 1433, 1384, 1303, 1280, 1227, 1191, 1159, 1128, 1057, 618; HRMS (ESI): *m/z* Calcd. for C<sub>23</sub>H<sub>21</sub>ClF<sub>3</sub>NO<sub>5</sub>Na [M+Na]<sup>+</sup> 506.0953, Found 506.0942.

### 1-(2-Aminophenyl)-3-(2-(dimethoxymethyl)phenyl)prop-2-yn-1-one (3m)

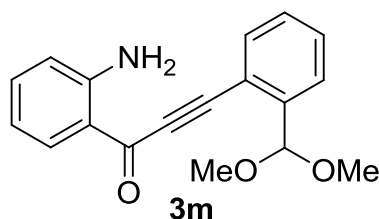

Yellow oil in 78% yield (EtOAc/petroleum ether = 1:10); <sup>1</sup>H NMR (600 MHz, CDCl<sub>3</sub>) δ 8.27 (dd, *J* = 8.1, 1.5 Hz, 1H), 7.68 (dd, *J* = 3.2, 0.7 Hz, 1H), 7.67 (dd, *J* = 3.4, 0.8 Hz, 1H), 7.48 (td, *J* = 7.7, 1.1 Hz, 1H), 7.38 (td, *J* = 7.6, 1.2 Hz, 1H), 7.34 – 7.30 (m, 1H), 6.75 – 6.70 (m, 1H), 6.67 (d, *J* = 8.3 Hz, 1H), 6.39 (s, 2H), 5.74 (s, 1H), 3.43 (s, 6H); <sup>13</sup>C NMR (150 MHz, CDCl<sub>3</sub>) δ 179.51, 151.23, 141.37, 135.47, 134.75, 133.78, 130.40, 128.74, 126.70, 119.58, 119.15, 116.86, 116.27, 102.40, 91.53, 89.74, 54.34; IR (thin film, cm<sup>-1</sup>) 3448, 3344, 2932, 2830, 2199, 1620, 1582, 1541, 1478, 1447, 1303, 1256, 1213, 1159, 1115, 1052, 1003, 750, 691, 626, 525; HRMS (ESI): *m/z* Calcd. for C<sub>18</sub>H<sub>17</sub>NO<sub>3</sub>Na [M+Na]<sup>+</sup> 318.1101, Found 318.1096.

## 2.5 General Procedure for the Preparation of 10a-10d and Characterization Data

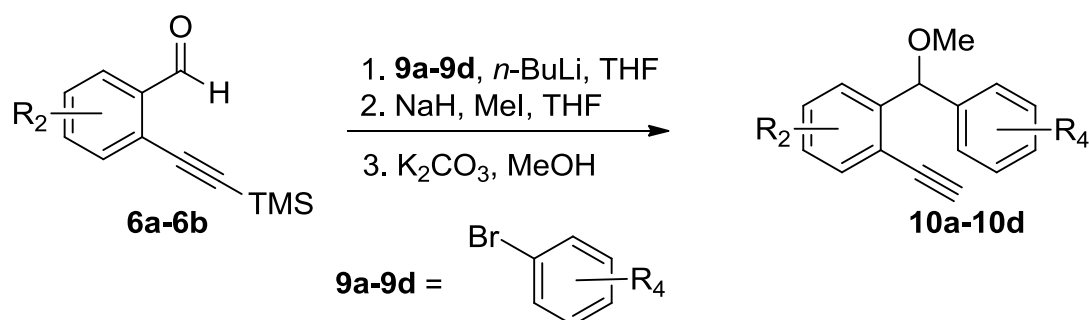

To a stirring solution of **9a-9d** (1 mmol) in THF (5 mL) was added a solution of *n*-BuLi

(1.0 M in THF, 1.0 mL) dropwise at  $-78\text{ }^{\circ}\text{C}$  under nitrogen atmosphere. After stirring for 1 hour, the solution was added **6a-6b** (1.0 mmol) dropwise at  $-78\text{ }^{\circ}\text{C}$ . After stirring at  $-78\text{ }^{\circ}\text{C}$  for another 1 hour, the solution was warmed to  $0\text{ }^{\circ}\text{C}$  for 1 hour. The reaction mixture was quenched by addition of a saturated aqueous solution of  $\text{NH}_4\text{Cl}$ . The aqueous phase was extracted with ethyl acetate. The combined organic portions were washed with  $\text{H}_2\text{O}$ , saturated aqueous solution of  $\text{NaCl}$ , dried over anhydrous  $\text{Na}_2\text{SO}_4$ , filtered and reduced *in vacuo*.

To a solution of the residue obtained above in THF (5 mL) was added  $\text{NaH}$  (60% dispersion in mineral oil, 1.2 mmol, 48 mg) at  $0\text{ }^{\circ}\text{C}$  and the resulting mixture was stirred for 1 hour at room temperature before  $\text{MeI}$  (2.0 mmol, 284 mg) was added. After TLC showed the starting material was completely consumed, the reaction mixture was filtrated through Celite and the filtrate was concentrated *in vacuo*.

The residue obtained above was resolved in  $\text{MeOH}$  (5 mL) and anhydrous  $\text{K}_2\text{CO}_3$  (5 mmol, 691 mg) was added to the solution. Desilylation was conducted at room temperature for 5 hours till TLC showed the starting material was completely consumed. The reaction mixture was filtrated through Celite. The filtrate was concentrated and purified by a flash column chromatography on silica gel to afford the products **10a-10d**.  
[S4]

### 1-Ethynyl-4-methoxy-2-(methoxy(4-methoxyphenyl)methyl)benzene (**10b**)

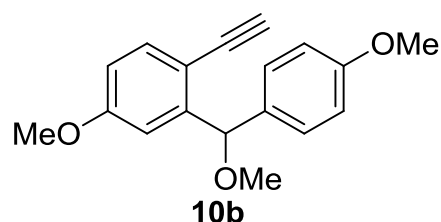

White solid in 48% yield (EtOAc/petroleum ether = 1:50): Mp  $94.8\text{--}95.6\text{ }^{\circ}\text{C}$ ;  $^1\text{H NMR}$  (600 MHz,  $\text{CDCl}_3$ )  $\delta$  7.43 (d,  $J = 8.5\text{ Hz}$ , 1H), 7.36 (d,  $J = 8.5\text{ Hz}$ , 2H), 7.11 (d,  $J = 2.7\text{ Hz}$ , 1H), 6.86 (d,  $J = 8.8\text{ Hz}$ , 2H), 6.76 (dd,  $J = 8.5, 2.7\text{ Hz}$ , 1H), 5.74 (s, 1H), 3.81 (s, 3H), 3.78 (s, 3H), 3.40 (s, 3H), 3.27 (s, 1H);  $^{13}\text{C NMR}$  (150 MHz,  $\text{CDCl}_3$ )  $\delta$  160.49, 159.04, 146.77, 134.42, 133.55, 128.33, 113.74, 113.27, 113.03, 111.23, 82.09, 81.98, 80.86, 57.09, 55.40, 55.27; IR (thin film,  $\text{cm}^{-1}$ ) 3443, 3262, 2931, 2837, 2819, 2100, 2033, 1607, 1512, 1486, 1293, 1232, 1105, 1077, 1033, 969, 861, 832, 792, 680, 567, 541; HRMS (ESI):  $m/z$  Calcd. for  $\text{C}_{18}\text{H}_{19}\text{O}_3$   $[\text{M}+\text{H}]^+$  283.1329, Found 283.1374.

### 2-((2,4-Dimethoxyphenyl)(methoxy)methyl)-1-ethynyl-4-methoxybenzene (**10c**)

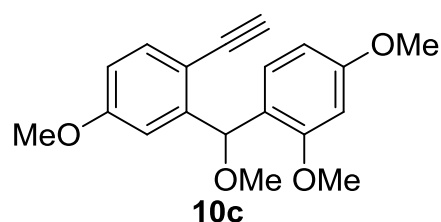

Colorless oil in 40% yield (EtOAc/petroleum ether = 1:50);  $^1\text{H NMR}$  (600 MHz,  $\text{CDCl}_3$ )  $\delta$  7.41 (d,

$J = 8.5$  Hz, 1H), 7.15 (d,  $J = 8.2$  Hz, 1H), 6.98 (d,  $J = 2.7$  Hz, 1H), 6.74 (dd,  $J = 8.5, 2.7$  Hz, 1H), 6.47 – 6.42 (m, 2H), 6.01 (s, 1H), 3.79 (s, 3H), 3.79 (s, 3H), 3.78 (s, 3H), 3.41 (s, 3H), 3.15 (s, 1H);  $^{13}\text{C}$  NMR (150 MHz,  $\text{CDCl}_3$ )  $\delta$  160.48, 160.15, 158.60, 146.38, 134.37, 128.58, 122.01, 113.93, 112.86, 112.60, 104.23, 98.61, 81.98, 80.03, 76.75, 57.51, 55.61, 55.45, 55.43; IR (thin film,  $\text{cm}^{-1}$ ) 3436, 3281, 2999, 2932, 2836, 2101, 1609, 1504, 1464, 1296, 1208, 1158, 1117, 1081, 1036, 966, 826, 640, 617; HRMS (ESI):  $m/z$  Calcd. for  $\text{C}_{19}\text{H}_{20}\text{O}_4\text{Na}$   $[\text{M}+\text{Na}]^+$  335.1254, Found 335.1254.

### 1-Ethynyl-4-methoxy-2-(methoxy(4-phenoxyphenyl)methyl)benzene (10d)

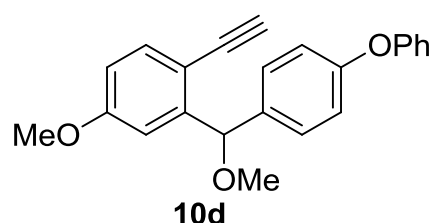

Colorless oil in 41% yield (EtOAc/petroleum ether = 1:50);  $^1\text{H}$  NMR (600 MHz,  $\text{CDCl}_3$ )  $\delta$  7.43 (d,  $J = 8.5$  Hz, 1H), 7.38 (d,  $J = 8.7$  Hz, 2H), 7.33 – 7.29 (m, 2H), 7.11 – 7.07 (m, 2H), 6.99 (d,  $J = 8.0$  Hz, 2H), 6.94 (d,  $J = 8.6$  Hz, 2H), 6.77 (dd,  $J = 8.5, 2.7$  Hz, 1H), 5.77 (s, 1H), 3.82 (s, 3H), 3.41 (s, 3H), 3.26 (s, 1H);  $^{13}\text{C}$  NMR (150 MHz,  $\text{CDCl}_3$ )  $\delta$  160.60, 157.26, 156.72, 146.50, 136.34, 134.52, 129.83, 128.51, 123.38, 119.09, 118.68, 113.46, 113.19, 111.35, 82.09, 81.93, 80.96, 57.26, 55.51; IR (thin film,  $\text{cm}^{-1}$ ) 3429, 3283, 2921, 2823, 2184, 2101, 1664, 1606, 1589, 1487, 1296, 1232, 1164, 1099, 1036, 871, 752, 692, 618, 531; HRMS (ESI):  $m/z$  Calcd. for  $\text{C}_{23}\text{H}_{21}\text{O}_3$   $[\text{M}+\text{H}]^+$  345.1485, Found 345.1490.

## 2.6 General Procedures for the Preparation of 1n-1y and Characterization Data

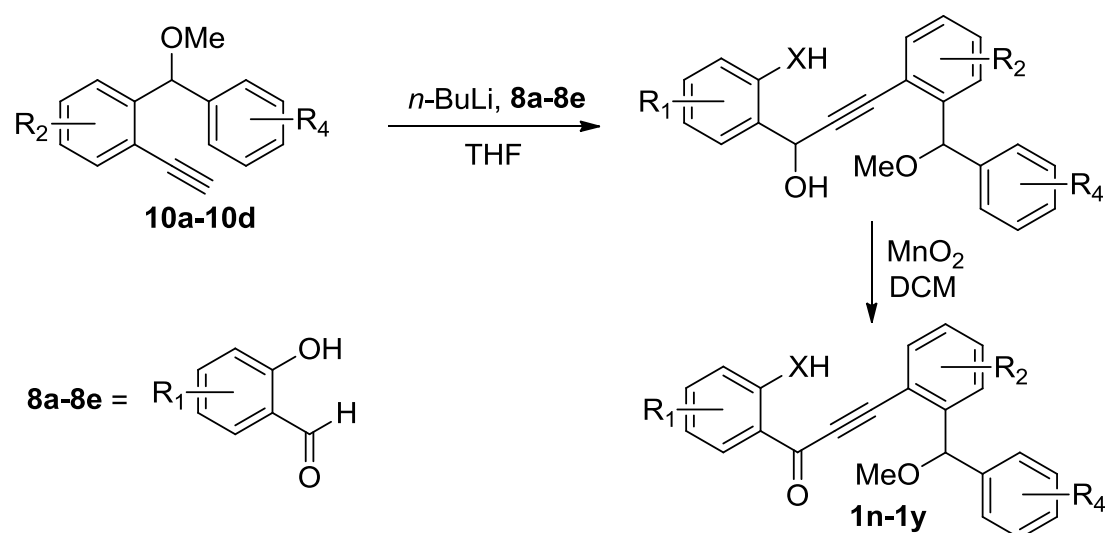

The experiment procedures for the preparation of **1n-1y** were the same with those of **3a-3m**.

### 1-(2-Hydroxyphenyl)-3-(2-(methoxy(4-methoxyphenyl)methyl)phenyl)prop-2-yn-1-one (1n)

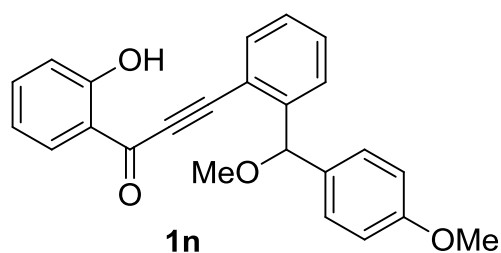

Yellow solid in 54% yield (EtOAc/petroleum ether = 1:70): Mp 86.5–88.6 °C;  $^1\text{H NMR}$  (600 MHz,  $\text{CDCl}_3$ )  $\delta$  11.76 (s, 1H), 7.97 (dd,  $J = 7.9, 1.4$  Hz, 1H), 7.67 (d,  $J = 8.0$  Hz, 2H), 7.56–7.50 (m, 2H), 7.36–7.31 (m, 3H), 7.01 (d,  $J = 8.4$  Hz, 1H), 6.93 (t,  $J = 7.5$  Hz, 1H), 6.85 (d,  $J = 8.7$  Hz, 2H), 5.75 (s, 1H), 3.77 (s, 3H), 3.42 (s, 3H);  $^{13}\text{C NMR}$  (150 MHz,  $\text{CDCl}_3$ )  $\delta$  182.22, 162.96, 159.34, 146.44, 137.30, 134.01, 133.15, 132.81, 131.69, 128.83, 127.64, 126.67, 120.92, 119.53, 118.47, 118.27, 114.00, 94.24, 90.50, 82.56, 57.30, 55.36; IR (thin film,  $\text{cm}^{-1}$ ) 3424, 2922, 2850, 2186, 1623, 1589, 1511, 1479, 1347, 1303, 1232, 1174, 1152, 1101, 1083, 1035, 1013, 842, 800, 760, 620; HRMS (ESI):  $m/z$  Calcd. for  $\text{C}_{24}\text{H}_{20}\text{O}_4\text{Na}$   $[\text{M}+\text{Na}]^+$  395.1254, Found 395.1257.

**1-(2-Hydroxy-5-methylphenyl)-3-(2-(methoxy(4-methoxyphenyl)methyl)phenyl)prop-2-yn-1-one (1o)**

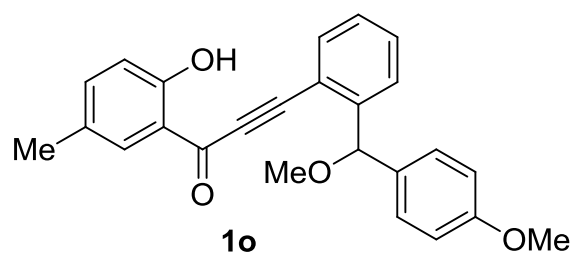

Yellow solid in 50% yield (EtOAc/petroleum ether = 1:70): Mp 70.6–71.7 °C;  $^1\text{H NMR}$  (600 MHz,  $\text{CDCl}_3$ )  $\delta$  11.60 (s, 1H), 7.82 (d,  $J = 1.5$  Hz, 1H), 7.67 (dd,  $J = 7.7, 1.2$  Hz, 2H), 7.56–7.50 (m, 1H), 7.37–7.33 (m, 4H), 6.92 (d,  $J = 8.5$  Hz, 1H), 6.87–6.81 (m, 2H), 5.77 (s, 1H), 3.76 (s, 3H), 3.42 (s, 3H), 2.29 (s, 3H);  $^{13}\text{C NMR}$  (150 MHz,  $\text{CDCl}_3$ )  $\delta$  182.13, 161.00, 159.30, 146.53, 138.50, 133.90, 133.86, 132.88, 132.63, 131.64, 128.76, 128.65, 127.64, 126.64, 120.57, 118.55, 118.09, 114.00, 94.06, 90.55, 82.51, 57.24, 55.34, 20.56; IR (thin film,  $\text{cm}^{-1}$ ) 3432, 2921, 2851, 2195, 1631, 1600, 1481, 1464, 1447, 1384, 1344, 1247, 1172, 1036, 1020, 780, 621, 535; HRMS (ESI):  $m/z$  Calcd. for  $\text{C}_{25}\text{H}_{22}\text{O}_4\text{Na}$   $[\text{M}+\text{Na}]^+$  409.1410, Found 409.1417.

**1-(2-Hydroxy-3,5-dimethylphenyl)-3-(2-(methoxy(4-methoxyphenyl)methyl)phenyl)prop-2-yn-1-one (1p)**

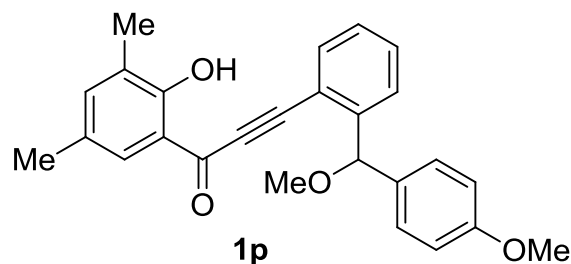



Yellow solid in 59% yield (EtOAc/petroleum ether = 1:70): Mp 115.5–117.3 °C; <sup>1</sup>H NMR (600 MHz, CDCl<sub>3</sub>) δ 11.89 (s, 1H), 7.69 – 7.64 (m, 3H), 7.52 (td, *J* = 7.8, 1.1 Hz, 1H), 7.37 – 7.30 (m, 3H), 7.23 (d, *J* = 0.6 Hz, 1H), 6.86 – 6.82 (m, 2H), 5.78 (s, 1H), 3.76 (s, 3H), 3.42 (s, 3H), 2.27 (s, 3H), 2.26 (s, 3H); <sup>13</sup>C NMR (150 MHz, CDCl<sub>3</sub>) δ 182.27, 159.52, 159.28, 146.50, 139.49, 133.86, 132.93, 131.55, 130.17, 128.64, 128.01, 127.61, 127.13, 126.58, 119.96, 118.67, 113.99, 93.76, 90.78, 82.49, 57.24, 55.34, 20.56, 15.40; IR (thin film, cm<sup>-1</sup>) 3427, 2921, 2851, 2193, 1604, 1574, 1464, 1433, 1383, 1357, 1303, 1271, 1244, 1221, 1174, 1082, 836, 790, 619, 591, 564; HRMS (ESI): *m/z* Calcd. for C<sub>26</sub>H<sub>25</sub>O<sub>4</sub> [M+H]<sup>+</sup> 401.1747, Found 401.1749.

**1-(2-Hydroxy-4-methoxyphenyl)-3-(2-(methoxy(4-methoxyphenyl)methyl)phenyl)prop-2-yn-1-one (1q)**

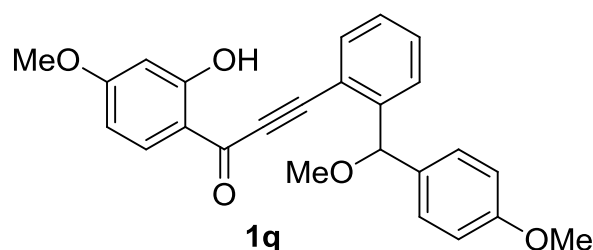

Yellow solid in 58% yield (EtOAc/petroleum ether = 1:70): Mp 79.4–81.2 °C; <sup>1</sup>H NMR (600 MHz, CDCl<sub>3</sub>) δ 12.23 (d, *J* = 1.4 Hz, 1H), 7.82 (d, *J* = 8.7 Hz, 1H), 7.65 (t, *J* = 7.2 Hz, 2H), 7.51 (t, *J* = 7.7 Hz, 1H), 7.36 – 7.29 (m, 3H), 6.85 (d, *J* = 8.7 Hz, 2H), 6.47 – 6.43 (m, 2H), 5.74 (s, 1H), 3.87 (s, 3H), 3.77 (s, 3H), 3.41 (s, 3H); <sup>13</sup>C NMR (150 MHz, CDCl<sub>3</sub>) δ 180.27, 167.15, 165.90, 159.33, 146.33, 146.18, 134.82, 133.85, 132.90, 131.42, 128.83, 127.60, 126.60, 118.77, 115.44, 113.99, 108.62, 100.74, 93.38, 90.46, 82.55, 57.32, 55.89, 55.37; IR (thin film, cm<sup>-1</sup>) 3426, 2920, 2851, 2202, 1631, 1584, 1510, 1462, 1359, 1269, 1230, 1123, 1082, 1032, 1011, 958, 801, 760, 620, 582, 553, 523; HRMS (ESI): *m/z* Calcd. for C<sub>25</sub>H<sub>22</sub>O<sub>5</sub>Na [M+Na]<sup>+</sup> 425.1359, Found 425.1367.

**1-(5-Chloro-2-hydroxyphenyl)-3-(2-(methoxy(4-methoxyphenyl)methyl)phenyl)prop-2-yn-1-one (1r)**

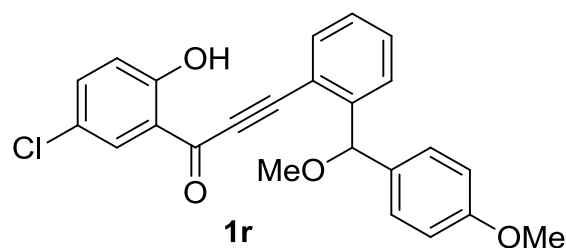

Yellow solid in 55% yield (EtOAc/petroleum ether = 1:70): Mp 123.3–125.1 °C; <sup>1</sup>H NMR (600 MHz, CDCl<sub>3</sub>) δ 11.68 (s, 1H), 8.04 (d, *J* = 2.6 Hz, 1H), 7.70 – 7.65 (m, 2H), 7.57 – 7.53 (m, 1H), 7.47 (dd, *J* = 8.9, 2.6 Hz, 1H), 7.37 – 7.31 (m, 3H), 6.98 (d, *J* = 8.9 Hz, 1H), 6.87 – 6.82 (m, 2H), 5.72 (s, 1H), 3.76 (s, 3H), 3.43 (s, 3H); <sup>13</sup>C NMR (150 MHz, CDCl<sub>3</sub>) δ 181.16, 161.43, 159.36, 146.74, 137.15, 134.27, 132.66, 131.96, 131.91, 128.74, 127.72, 126.81, 124.26, 121.44, 120.03, 118.01, 114.02, 95.37, 90.07, 82.68, 57.28, 55.34; IR (thin film, cm<sup>-1</sup>) 3422, 2946, 2931, 2824, 1993, 1632, 1578, 1463, 1379, 1347, 1292, 1211, 1090, 1053, 968, 778, 732, 611; HRMS (ESI): *m/z* Calcd. for C<sub>24</sub>H<sub>20</sub>ClO<sub>4</sub> [M+H]<sup>+</sup> 407.1045, Found 407.1038.

**1-(2-Hydroxyphenyl)-3-(4-methoxy-2-(methoxy(4-methoxyphenyl)methyl)phenyl)prop-2-yn-1-one (1s)**

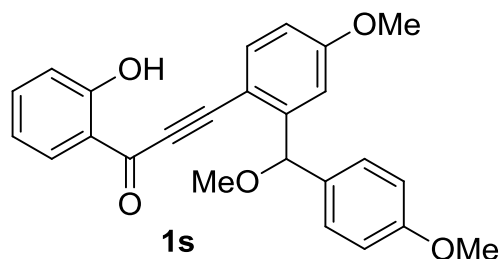

Yellow solid in 53% yield (EtOAc/petroleum ether = 1:70); Mp 91.3–92.9 °C; <sup>1</sup>H NMR (600 MHz, CDCl<sub>3</sub>) δ 11.85 (s, 1H), 7.97 (dd, *J* = 7.9, 1.6 Hz, 1H), 7.61 (d, *J* = 8.5 Hz, 1H), 7.53 – 7.49 (m, 1H), 7.37 – 7.33 (m, 2H), 7.22 (d, *J* = 2.6 Hz, 1H), 7.00 (dd, *J* = 8.3, 0.5 Hz, 1H), 6.94 – 6.89 (m, 1H), 6.85 (dt, *J* = 4.8, 2.2 Hz, 3H), 5.73 (s, 1H), 3.88 (s, 3H), 3.77 (s, 3H), 3.42 (s, 3H); <sup>13</sup>C NMR (150 MHz, CDCl<sub>3</sub>) δ 182.29, 162.90, 162.65, 159.38, 149.07, 137.03, 136.12, 133.04, 132.71, 128.82, 120.97, 119.43, 118.24, 114.00, 113.78, 111.97, 110.26, 95.57, 90.52, 82.46, 57.33, 55.72, 55.38; IR (thin film, cm<sup>-1</sup>) 3425, 2922, 2851, 2187, 1623, 1590, 1511, 1479, 1384, 1346, 1303, 1250, 1232, 1174, 1152, 1101, 1083, 1035, 1012, 843, 799, 759, 620; HRMS (ESI): *m/z* Calcd. for C<sub>25</sub>H<sub>22</sub>O<sub>5</sub>Na [M+Na]<sup>+</sup> 425.1359, Found 425.1359.

**1-(2-Hydroxy-5-methylphenyl)-3-(4-methoxy-2-(methoxy(4-methoxyphenyl)methyl)phenyl)prop-2-yn-1-one (1t)**

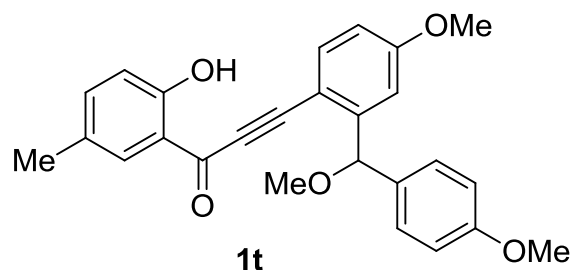

Yellow solid in 58% yield (EtOAc/petroleum ether = 1:70); Mp 95.3–97.2 °C; <sup>1</sup>H NMR (600 MHz, CDCl<sub>3</sub>) δ 11.69 (s, 1H), 7.82 (d, *J* = 1.0 Hz, 1H), 7.61 (d, *J* = 8.5 Hz, 1H), 7.36 (d, *J* = 8.7 Hz, 2H), 7.32 (dd, *J* = 8.5, 1.9 Hz, 1H), 7.21 (d, *J* = 2.5 Hz, 1H), 6.91 (d, *J* = 8.5 Hz, 1H), 6.87 – 6.82 (m, 3H), 5.76 (s, 1H), 3.88 (s, 3H), 3.76 (s, 3H), 3.43 (s, 3H), 2.29 (s, 3H); <sup>13</sup>C NMR (150 MHz, CDCl<sub>3</sub>) δ 182.19, 162.59, 160.91, 159.32, 149.16, 138.20, 136.00, 132.78, 132.55, 128.61, 120.60, 118.04, 114.00, 113.82, 111.89, 110.34, 95.37, 90.53, 82.41, 57.25, 55.70, 55.35, 20.58; IR (thin film, cm<sup>-1</sup>) 3426, 2920, 2851, 2186, 1627, 1608, 1511, 1461, 1384, 1348, 1300, 1246, 1173, 1108, 1035, 836, 800, 780, 620, 537; HRMS (ESI): *m/z* Calcd. for C<sub>26</sub>H<sub>24</sub>O<sub>5</sub>Na [M+Na]<sup>+</sup> 439.1516, Found 439.1517.

**1-(2-Hydroxy-3,5-dimethylphenyl)-3-(4-methoxy-2-(methoxy(4-methoxyphenyl)methyl)phenyl)prop-2-yn-1-one (1u)**

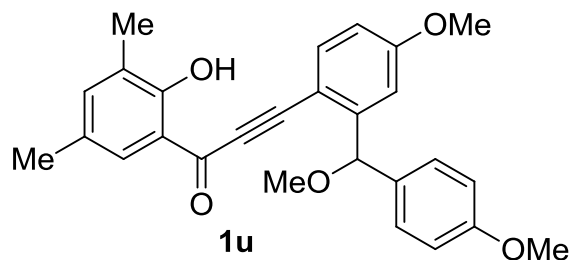

Yellow solid in 57% yield (EtOAc/petroleum ether = 1:70): Mp 115.6–117.4 °C; <sup>1</sup>H NMR (600 MHz, CDCl<sub>3</sub>) δ 11.98 (s, 1H), 7.68 (s, 1H), 7.61 (d, *J* = 8.5 Hz, 1H), 7.36 (d, *J* = 8.7 Hz, 2H), 7.20 (d, *J* = 2.7 Hz, 2H), 6.86 – 6.82 (m, 3H), 5.76 (s, 1H), 3.87 (s, 3H), 3.76 (s, 3H), 3.42 (s, 3H), 2.26 (s, 6H); <sup>13</sup>C NMR (150 MHz, CDCl<sub>3</sub>) δ 182.35, 162.52, 159.43, 159.31, 149.10, 139.20, 135.95, 132.83, 130.10, 128.60, 127.87, 127.06, 119.99, 114.00, 113.81, 111.83, 110.47, 95.04, 90.73, 82.39, 57.25, 55.69, 55.35, 20.58, 15.41; IR (thin film, cm<sup>-1</sup>) 3427, 2920, 2851, 2193, 1604, 1574, 1510, 1487, 1464, 1432, 1383, 1357, 1303, 1271, 1245, 1221, 1174, 1082, 1035, 836, 789, 591, 564; HRMS (ESI): *m/z* Calcd. for C<sub>27</sub>H<sub>26</sub>O<sub>5</sub>Na [M+Na]<sup>+</sup> 453.1672, Found 453.1671.

**1-(2-Hydroxy-4-methoxyphenyl)-3-(4-methoxy-2-(methoxy(4-methoxyphenyl)methyl)phenyl)prop-2-yn-1-one (1v)**

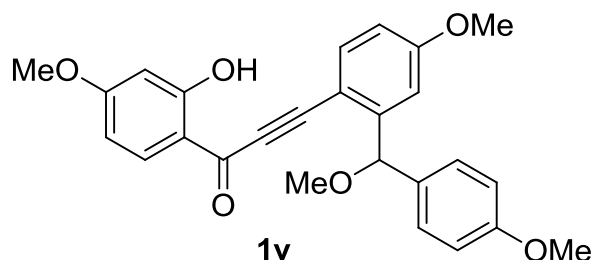

Yellow solid in 55% yield (EtOAc/petroleum ether = 1:70): Mp 92.6–94.2 °C; <sup>1</sup>H NMR (600 MHz, CDCl<sub>3</sub>) δ 12.32 (s, 1H), 7.83 (d, *J* = 8.8 Hz, 1H), 7.59 (d, *J* = 8.5 Hz, 1H), 7.35 (d, *J* = 8.7 Hz, 2H), 7.20 (d, *J* = 2.6 Hz, 1H), 6.85 (dq, *J* = 8.1, 2.7 Hz, 3H), 6.44 (dt, *J* = 5.7, 2.4 Hz, 2H), 5.72 (s, 1H), 3.87 (s, 3H), 3.86 (s, 3H), 3.77 (s, 3H), 3.42 (s, 3H); <sup>13</sup>C NMR (150 MHz, CDCl<sub>3</sub>) δ 180.41, 166.91, 165.77, 162.39, 159.34, 148.71, 135.87, 134.68, 132.77, 128.79, 115.42, 113.97, 113.69, 111.89, 110.54, 108.45, 100.71, 94.57, 90.28, 82.44, 57.31, 55.84, 55.67, 55.36; IR (thin film, cm<sup>-1</sup>) 3425, 2921, 2850, 2194, 1605, 1584, 1510, 1361, 1280, 1232, 1111, 1085, 1036, 1012, 845, 829, 813, 620, 528; HRMS (ESI): *m/z* Calcd. for C<sub>26</sub>H<sub>24</sub>O<sub>6</sub>Na [M+Na]<sup>+</sup> 455.1465, Found 455.1468.

**1-(5-Chloro-2-hydroxyphenyl)-3-(4-methoxy-2-(methoxy(4-methoxyphenyl)methyl)phenyl)prop-2-yn-1-one (1w)**

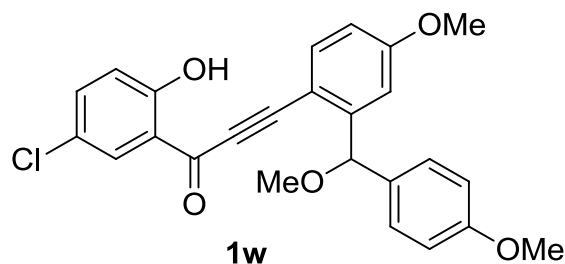

Yellow solid in 57% yield (EtOAc/petroleum ether = 1:70): Mp 124.4–125.9 °C; <sup>1</sup>H NMR (600 MHz, CDCl<sub>3</sub>) δ 11.78 (s, 1H), 8.03 (d, *J* = 2.6 Hz, 1H), 7.63 (d, *J* = 8.5 Hz, 1H), 7.45 (dd, *J* = 8.9, 2.6 Hz, 1H), 7.37–7.33 (m, 2H), 7.23 (d, *J* = 2.6 Hz, 1H), 6.96 (d, *J* = 8.9 Hz, 1H), 6.88–6.83 (m, 3H), 5.70 (s, 1H), 3.89 (s, 3H), 3.76 (s, 3H), 3.44 (s, 3H); <sup>13</sup>C NMR (150 MHz, CDCl<sub>3</sub>) δ 181.16, 162.88, 161.36, 159.39, 149.42, 136.85, 136.46, 132.55, 131.84, 128.76, 124.13, 121.50, 119.98, 114.03, 113.80, 112.18, 109.74, 96.86, 90.25, 82.57, 57.30, 55.74, 55.35; IR (thin film, cm<sup>-1</sup>) 3429, 2921, 2851, 2187, 1624, 1587, 1511, 1466, 1352, 1304, 1250, 1228, 1187, 1091, 1035, 1014, 836, 646, 537; HRMS (ESI): *m/z* Calcd. for C<sub>27</sub>H<sub>21</sub>ClO<sub>5</sub> [M+H]<sup>+</sup> 460.1072, Found 460.1080.

**1-(2-Hydroxyphenyl)-3-(4-methoxy-2-(methoxy(4-phenoxyphenyl)methyl)phenyl)prop-2-yn-1-one (1x)**

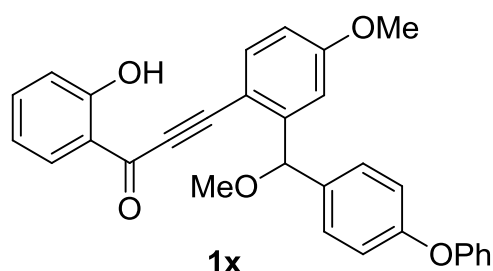

Yellow oil in 60% yield (EtOAc/petroleum ether = 1:80); <sup>1</sup>H NMR (600 MHz, CDCl<sub>3</sub>) δ 11.82 (s, 1H), 7.98 (dd, *J* = 8.0, 1.6 Hz, 1H), 7.64 (d, *J* = 8.5 Hz, 1H), 7.54–7.48 (m, 1H), 7.39 (d, *J* = 8.7 Hz, 2H), 7.30 (t, *J* = 8.0 Hz, 2H), 7.22 (d, *J* = 2.6 Hz, 1H), 7.09 (t, *J* = 7.4 Hz, 1H), 7.02–6.90 (m, 6H), 6.88 (dd, *J* = 8.5, 2.6 Hz, 1H), 5.77 (s, 1H), 3.89 (s, 3H), 3.45 (s, 3H); <sup>13</sup>C NMR (150 MHz, CDCl<sub>3</sub>) δ 182.22, 162.91, 162.68, 157.15, 157.02, 148.68, 137.07, 136.16, 135.36, 132.96, 129.87, 128.93, 123.55, 120.93, 119.44, 119.23, 118.72, 118.28, 113.87, 112.12, 110.36, 95.39, 90.53, 82.37, 57.46, 55.73; IR (thin film, cm<sup>-1</sup>) 3439, 2929, 2850, 2184, 1629, 1463, 1384, 1130, 878, 619; HRMS (ESI): *m/z* Calcd. for C<sub>30</sub>H<sub>24</sub>O<sub>5</sub>Na [M+Na]<sup>+</sup> 487.1516, Found 487.1498.

**3-(2-((2,4-Dimethoxyphenyl)(methoxy)methyl)-4-methoxyphenyl)-1-(2-hydroxyphenyl)prop-2-yn-1-one (1y)**

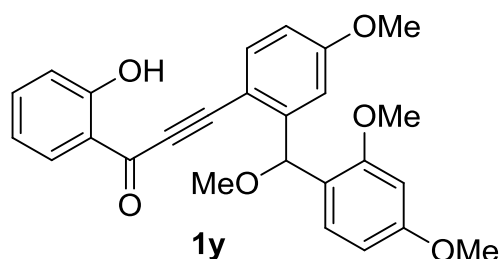

Yellow oil in 56% yield (EtOAc/petroleum ether = 1:50); <sup>1</sup>H NMR (600 MHz, CDCl<sub>3</sub>) δ 11.89 (s, 1H), 8.02 (dd, *J* = 7.9, 1.6 Hz, 1H), 7.62 (d, *J* = 8.5 Hz, 1H), 7.49 (t, *J* = 7.0 Hz, 1H), 7.18 (d, *J* = 8.5 Hz, 1H), 7.10 (d, *J* = 2.6 Hz, 1H), 6.98 (d, *J* = 7.9 Hz, 1H), 6.91 (t, *J* = 7.1 Hz, 1H), 6.84 (dd, *J* = 8.5, 2.6 Hz, 1H), 6.46 (dd, *J* = 8.5, 2.4 Hz, 1H), 6.42 (d, *J* = 2.3 Hz, 1H), 6.09 (s, 1H), 3.85 (s, 3H), 3.78 (s, 3H), 3.70 (s, 3H), 3.44 (s, 3H); <sup>13</sup>C NMR (150 MHz, CDCl<sub>3</sub>) δ 182.43, 162.84, 162.19, 160.70, 158.41, 148.33, 136.86, 135.95, 133.16, 128.38, 121.50, 121.05, 119.35, 118.10, 113.43, 113.20, 111.10, 104.34, 98.54, 95.88, 89.66, 76.85, 57.57, 55.58, 55.48, 55.43; IR (thin film, cm<sup>-1</sup>) 3425, 3000, 2934, 2837, 2184, 1593, 1503, 1464, 1342, 1299, 1206, 1153, 1082, 1036, 1012, 825,

794, 757, 690, 619, 530; HRMS (ESI):  $m/z$  Calcd. for  $C_{26}H_{24}O_6Na$   $[M+Na]^+$  455.1465, Found 455.1467.

### 3. Screening of the Reaction Conditions<sup>a</sup>

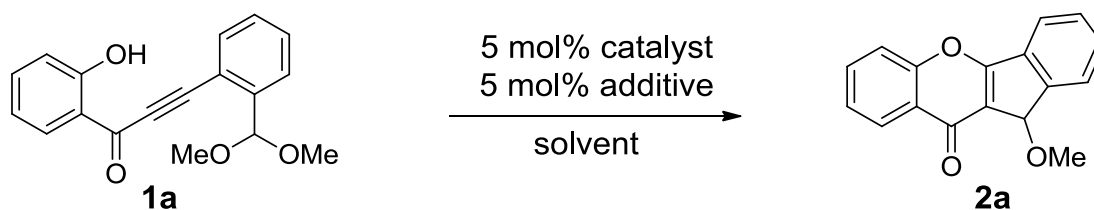

| Entry | catalyst                     | additive                            | solvent | yield (%) <sup>b</sup> |
|-------|------------------------------|-------------------------------------|---------|------------------------|
| 1     | $\text{Ph}_3\text{PAuNTf}_2$ | -                                   | toluene | 58                     |
| 2     | $\text{Ph}_3\text{PAuCl}$    | -                                   | toluene | 0                      |
| 3     | $\text{Ph}_3\text{PAuCl}$    | $\text{AgBF}_4$                     | toluene | 30                     |
| 4     | $\text{Ph}_3\text{PAuCl}$    | $\text{AgSbF}_6$                    | toluene | 45                     |
| 5     | $\text{Ph}_3\text{PAuCl}$    | $\text{AgBF}_4 + 4 \text{ \AA MS}$  | toluene | 30                     |
| 6     | $\text{Ph}_3\text{PAuCl}$    | $\text{AgSbF}_6 + 4 \text{ \AA MS}$ | toluene | 90                     |
| 7     | $\text{Ph}_3\text{PAuNTf}_2$ | $4 \text{ \AA MS}$                  | toluene | 80                     |
| 8     | $\text{Ph}_3\text{PAuCl}$    | $\text{AgSbF}_6 + 4 \text{ \AA MS}$ | DCM     | 93                     |
| 9     | $\text{Ph}_3\text{PAuCl}$    | $\text{AgSbF}_6 + 4 \text{ \AA MS}$ | DCE     | 91                     |
| 10    | $\text{Ph}_3\text{PAuCl}$    | $\text{AgSbF}_6 + 4 \text{ \AA MS}$ | THF     | 0                      |
| 11    | TfOH                         | -                                   | DCM     | 0                      |
| 12    | $\text{AgSbF}_6$             | -                                   | DCM     | 0                      |

Note: [a] The reactions were conducted on 0.1 mmol scale at room temperature; [b] Yield of isolated product.

### 4. Procedures for the Preparation of 1a-4 and 4a-int and

#### Characterization Data

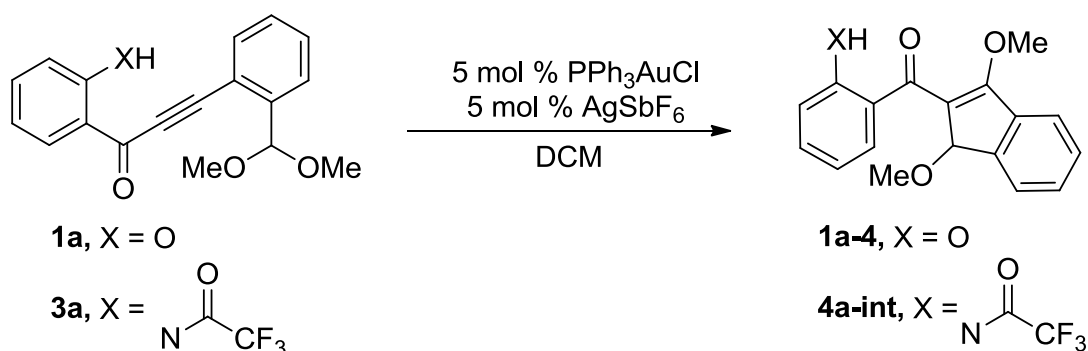

The gold catalyst was generated in a round bottom flask by addition of PPh<sub>3</sub>AuCl (0.01 mmol, 5 mg), AgSbF<sub>6</sub> (0.01 mmol, 4 mg), activated 4 Å molecular sieves (20 mg) and dry CH<sub>2</sub>Cl<sub>2</sub> (5 mL) under nitrogen atmosphere at room temperature. The mixture was stirred for 30 minutes before the solution of **1a** or **3a** (0.2 mmol) in dry CH<sub>2</sub>Cl<sub>2</sub> (5 mL) was added via a syringe. The mixture was stirred for 7 minutes for **1a** or 1 hour for **3a** at room temperature, the solvent was removed *in vacuo*. The residue was purified by a flash column chromatography on silica gel to afford the intermediate **1a-4** or **4a-int**.

**(1,3-Dimethoxy-1H-inden-2-yl)(2-hydroxyphenyl)methanone (1a-4)**

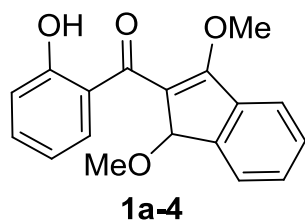

White solid in 90% yield (EtOAc/petroleum ether = 1:60): Mp 158.1–160.2 °C; <sup>1</sup>H NMR (600 MHz, CDCl<sub>3</sub>) δ 12.27 (s, 1H), 7.82 (dd, *J* = 8.0, 1.6 Hz, 1H), 7.53 – 7.47 (m, 3H), 7.41 (dd, *J* = 5.4, 2.7 Hz, 2H), 5.71 (s, 1H), 3.81 (s, 3H), 3.13 (s, 3H); <sup>13</sup>C NMR (150 MHz, CDCl<sub>3</sub>) δ 198.86, 162.32, 161.18, 141.45, 138.14, 136.48, 132.46, 129.10, 129.06, 124.19, 121.76, 120.62, 119.08, 118.40, 115.00, 83.19, 60.96, 53.10; IR (thin film, cm<sup>-1</sup>) 3425, 2921, 2851, 1621, 1588, 1572, 1481, 1441, 1378, 1240, 1151, 1073, 962, 762, 739, 643, 611; HRMS (ESI): *m/z* Calcd. for C<sub>18</sub>H<sub>16</sub>O<sub>4</sub>Na [M+Na]<sup>+</sup> 319.0941, Found 319.0959.

***N*-(2-(1,3-Dimethoxy-1H-indene-2-carbonyl)phenyl)-2,2,2-trifluoroacetamide (4a-int)**

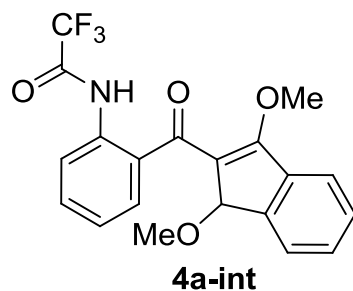

Yellow oil in 83% yield (EtOAc/petroleum ether = 1:10); <sup>1</sup>H NMR (600 MHz, CDCl<sub>3</sub>) δ 12.42 (s, 1H), 8.66 (d, *J* = 8.3 Hz, 1H), 7.98 (dd, *J* = 7.9, 1.4 Hz, 1H), 7.67 – 7.62 (m, 1H), 7.55 – 7.51 (m, 2H), 7.45 – 7.42 (m, 2H), 7.31 – 7.27 (m, 1H), 5.66 (s, 1H), 3.83 (s, 3H), 3.12 (s, 3H); <sup>13</sup>C NMR (150 MHz, CDCl<sub>3</sub>) δ 196.59, 163.73, 156.07, 155.82, 155.57, 155.32, 141.93, 137.77, 137.56, 134.83, 133.11, 129.76, 129.31, 125.98, 124.80, 124.41, 121.40, 121.22, 116.81, 116.47, 114.90, 82.94, 61.44, 53.34; IR (thin film, cm<sup>-1</sup>) 3444, 2922, 2852, 1732, 1627, 1525, 1439, 1384, 1282, 1249, 1153, 1116, 1075, 733, 619; HRMS (ESI): *m/z* Calcd. for C<sub>20</sub>H<sub>16</sub>F<sub>3</sub>NO<sub>4</sub>Na [M+Na]<sup>+</sup> 414.0924, Found 414.0924.

## 5. General Procedures for the Preparation of Indeno-chromen-4-ones

### (2a-2y) and Characterization Data

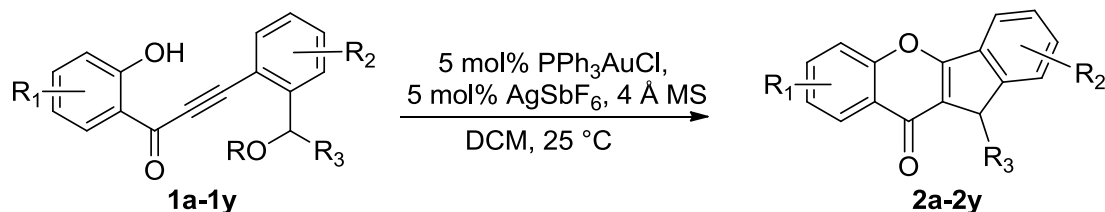

The gold catalyst was generated in a round bottom flask by addition of PPh<sub>3</sub>AuCl (0.01 mmol, 5 mg), AgSbF<sub>6</sub> (0.01 mmol, 4 mg), activated 4 Å molecular sieves (20 mg) and dry CH<sub>2</sub>Cl<sub>2</sub> (5 mL) under nitrogen atmosphere. The mixture was stirred for 30 min before the substrates **1a-1y** (0.2 mmol) in dry CH<sub>2</sub>Cl<sub>2</sub> (5 mL) were added via a syringe. The mixture was stirred at room temperature, after the consumption of the starting material. The solvent was removed in vacuo and the residue was purified by a flash column chromatography on silica gel to afford the products **2a-2y**.

### 11-Methoxyindeno[1,2-b]chromen-10(11H)-one (2a)

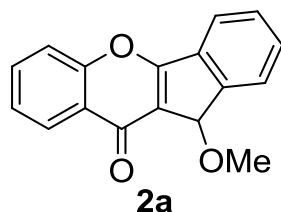

White solid in 93% yield (EtOAc/petroleum ether = 1:8): Mp 158.1–160.2 °C; <sup>1</sup>H NMR (600 MHz, DMSO-*d*<sub>6</sub>) δ 8.14 (d, *J* = 7.8 Hz, 1H), 7.87 – 7.73 (m, 3H), 7.69 (d, *J* = 7.2 Hz, 1H), 7.62 – 7.57 (m, 2H), 7.54 (t, *J* = 7.6 Hz, 1H), 5.58 (s, 1H), 3.31 (s, 3H); <sup>13</sup>C NMR (150 MHz, DMSO-*d*<sub>6</sub>) δ 173.17, 165.41, 155.61, 144.01, 133.91, 133.10, 131.51, 129.58, 125.95, 125.44, 125.39, 124.85, 120.71, 120.09, 118.55, 78.07, 54.87; IR (thin film, cm<sup>-1</sup>) 3432, 2924, 2852, 1646, 1624, 1556, 1480, 1463, 1431, 1109, 1080, 760, 738; HRMS (ESI): *m/z* Calcd. for C<sub>17</sub>H<sub>12</sub>O<sub>3</sub>Na [M+Na]<sup>+</sup> 287.0679, Found 287.0683.

### 8,11-Dimethoxyindeno[1,2-b]chromen-10(11H)-one (2b)

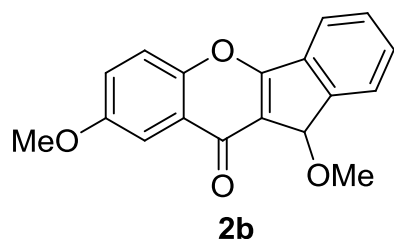

White solid in 95% yield (EtOAc/petroleum ether = 1:8): Mp 129.3–130.9 °C; <sup>1</sup>H NMR (600 MHz, CDCl<sub>3</sub>) δ 7.75 (d, *J* = 7.4 Hz, 1H), 7.71 (d, *J* = 3.1 Hz, 1H), 7.69 (d, *J* = 7.3 Hz, 1H), 7.55 – 7.52

(m, 2H), 7.49 (t,  $J = 7.3$  Hz, 1H), 7.29 – 7.26 (m, 1H), 5.64 (s, 1H), 3.92 (s, 3H), 3.45 (s, 3H);  $^{13}\text{C}$  NMR (150 MHz,  $\text{CDCl}_3$ )  $\delta$  174.53, 166.35, 157.44, 150.98, 144.33, 133.99, 131.47, 129.50, 126.37, 125.64, 123.00, 120.91, 119.82, 119.60, 106.01, 78.67, 56.10, 55.55; IR (thin film,  $\text{cm}^{-1}$ ) 3433, 2933, 2833, 1652, 1561, 1479, 1414, 1348, 1277, 1196, 1110, 1024, 955, 932, 821, 763, 729, 591, 563; HRMS (ESI):  $m/z$  Calcd. for  $\text{C}_{18}\text{H}_{14}\text{O}_4\text{Na}$   $[\text{M}+\text{Na}]^+$  317.0784, Found 317.0778.

**8-Fluoro-11-methoxyindeno[1,2-b]chromen-10(11H)-one (2c)**

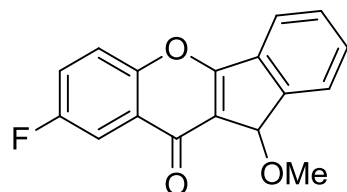

**2c**

White solid in 91% yield (EtOAc/petroleum ether = 1:8): Mp 149.2-150.5 °C;  $^1\text{H}$  NMR (600 MHz,  $\text{CDCl}_3$ )  $\delta$  7.97 (dd,  $J = 8.3, 3.1$  Hz, 1H), 7.76 (d,  $J = 7.4$  Hz, 1H), 7.69 (d,  $J = 7.4$  Hz, 1H), 7.61 (dd,  $J = 9.1, 4.1$  Hz, 1H), 7.56 (t,  $J = 7.4$  Hz, 1H), 7.52 (d,  $J = 7.7$  Hz, 1H), 7.45 – 7.38 (m, 1H), 5.63 (s, 1H), 3.47 (s, 3H);  $^{13}\text{C}$  NMR (150 MHz,  $\text{CDCl}_3$ )  $\delta$  173.72 (d,  $J = 1.5$  Hz), 166.78, 160.05 (d,  $J = 246.0$  Hz), 152.41 (d,  $J = 1.5$  Hz), 144.39, 133.63, 131.79, 129.61, 127.10 (d,  $J = 6.0$  Hz), 125.71, 121.34 (d,  $J = 25.2$  Hz), 121.06, 120.25 (d,  $J = 7.5$  Hz), 120.2 (d,  $J = 1.5$  Hz), 111.59 (d,  $J = 24.0$  Hz), 78.70, 55.85; IR (thin film,  $\text{cm}^{-1}$ ) 3437, 3057, 2911, 1647, 1560, 1471, 1418, 1249, 1180, 1110, 1073, 926, 866, 831, 766, 732, 668, 577, 556; HRMS (ESI):  $m/z$  Calcd. for  $\text{C}_{17}\text{H}_{11}\text{FO}_3\text{Na}$   $[\text{M}+\text{Na}]^+$  305.0584, Found 305.0590.

**11-Methoxy-8-nitroindeno[1,2-b]chromen-10(11H)-one (2d)**

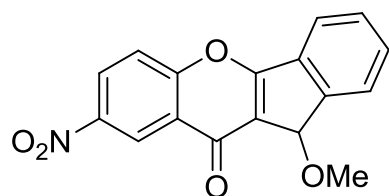

**2d**

White solid in 97% yield (EtOAc/petroleum ether = 1:8): Mp 198.1-199.3 °C;  $^1\text{H}$  NMR (600 MHz,  $\text{CDCl}_3$ )  $\delta$  9.16 (d,  $J = 2.8$  Hz, 1H), 8.51 (dd,  $J = 9.1, 2.8$  Hz, 1H), 7.80 – 7.40 (m, 2H), 7.71 (d,  $J = 7.4$  Hz, 1H), 7.59 (t,  $J = 7.4$  Hz, 1H), 7.53 (t,  $J = 7.5$  Hz, 1H), 5.61 (s, 1H), 3.50 (s, 3H);  $^{13}\text{C}$  NMR (150 MHz,  $\text{CDCl}_3$ )  $\delta$  172.67, 166.97, 159.04, 145.28, 144.40, 132.86, 132.30, 129.80, 127.80, 126.03, 125.81, 122.98, 121.24, 121.22, 119.99, 78.73, 56.25; IR (thin film,  $\text{cm}^{-1}$ ) 3433, 2925, 1651, 1621, 1534, 1446, 1347, 1245, 1117, 1083, 961, 838, 766, 734, 693, 574; HRMS (ESI):  $m/z$  Calcd. for  $\text{C}_{17}\text{H}_{11}\text{NO}_5\text{Na}$   $[\text{M}+\text{Na}]^+$  332.0529, Found 332.0536.

**11-Methoxy-3-methylindeno[1,2-b]chromen-10(11H)-one (2e)**



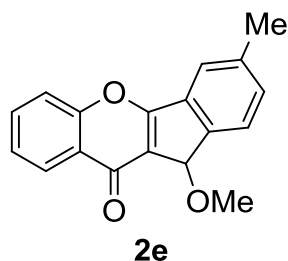

White solid in 89% yield (EtOAc/petroleum ether = 1:8): Mp 157.2–159.3 °C; <sup>1</sup>H NMR (600 MHz, CDCl<sub>3</sub>) δ 8.34 (dd, *J* = 7.9, 1.5 Hz, 1H), 7.72 – 7.66 (m, 1H), 7.60 – 7.58 (m, 2H), 7.57 (d, *J* = 7.6 Hz, 1H), 7.47 – 7.44 (m, 1H), 7.35 (d, *J* = 7.6 Hz, 1H), 5.61 (s, 1H), 3.44 (s, 3H), 2.47 (s, 3H); <sup>13</sup>C NMR (150 MHz, CDCl<sub>3</sub>) δ 174.65, 166.60, 156.30, 141.55, 139.71, 134.11, 133.35, 132.38, 126.47, 125.71, 125.69, 125.39, 121.48, 120.77, 118.25, 78.45, 55.43, 21.64; IR (thin film, cm<sup>-1</sup>) 3427, 2924, 2853, 1645, 1609, 1456, 1384, 1222, 1072, 810, 761; HRMS (ESI): *m/z* Calcd. for C<sub>18</sub>H<sub>14</sub>O<sub>3</sub>Na [M+Na]<sup>+</sup> 301.0835, Found 301.0830.

### 3-Fluoro-11-methoxyindeno[1,2-b]chromen-10(11H)-one (2f)

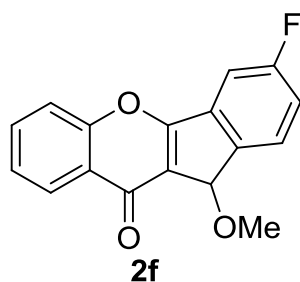

White solid in 93% yield (EtOAc/petroleum ether = 1:8): Mp 165.5–167.2 °C; <sup>1</sup>H NMR (600 MHz, CDCl<sub>3</sub>) δ 8.33 (dd, *J* = 7.9, 1.6 Hz, 1H), 7.75 – 7.68 (m, 1H), 7.64 (dd, *J* = 8.2, 4.7 Hz, 1H), 7.60 (dd, *J* = 8.4, 0.7 Hz, 1H), 7.49 – 7.45 (m, 2H), 7.25 – 7.19 (m, 1H), 5.59 (s, 1H), 3.48 (s, 3H); <sup>13</sup>C NMR (150 MHz, CDCl<sub>3</sub>) δ 174.57, 165.09 (d, *J* = 3.0 Hz), 163.75 (d, *J* = 247.5 Hz), 156.21, 139.76 (d, *J* = 3.0 Hz), 135.90 (d, *J* = 9.0 Hz), 133.66, 129.36 (d, *J* = 12.0 Hz), 127.07 (d, *J* = 9.0 Hz), 126.49, 125.94, 125.57, 122.09, 118.24 (d, *J* = 22.5 Hz), 108.40 (d, *J* = 24.0 Hz), 78.24, 55.88; IR (thin film, cm<sup>-1</sup>) 3439, 2921, 1648, 1607, 1455, 1419, 1195, 1108, 1071, 929, 873, 765; HRMS (ESI): *m/z* Calcd. for C<sub>17</sub>H<sub>11</sub>FO<sub>3</sub>Na [M+Na]<sup>+</sup> 305.0584, Found 305.0576.

### 8-Chloro-11-methoxy-3-methylindeno[1,2-b]chromen-10(11H)-one (2g)

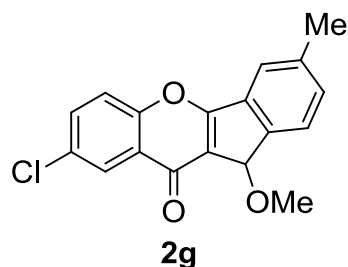

White solid in 92% yield (EtOAc/petroleum ether = 1:8): Mp 131.7–133.1 °C; <sup>1</sup>H NMR (600 MHz, CDCl<sub>3</sub>) δ 8.30 (d, *J* = 2.6 Hz, 1H), 7.63 (dd, *J* = 8.8, 2.6 Hz, 1H), 7.58 (d, *J* = 7.4 Hz, 2H), 7.55 (d, *J* = 8.8 Hz, 1H), 7.37 (d, *J* = 8.0 Hz, 1H), 5.60 (s, 1H), 3.44 (s, 3H), 2.48 (s, 3H); <sup>13</sup>C NMR (150

MHz, CDCl<sub>3</sub>)  $\delta$  173.32, 166.86, 154.62, 141.60, 139.86, 133.76, 133.48, 132.69, 131.76, 126.81, 126.00, 125.49, 121.57, 120.81, 119.89, 78.43, 55.59, 21.66; IR (thin film, cm<sup>-1</sup>) 3424, 2997, 2922, 2852, 2352, 1648, 1603, 1551, 1442, 1397, 1249, 1165, 1124, 1072, 927, 816, 688, 675, 566, 545; HRMS (ESI):  $m/z$  Calcd. for C<sub>18</sub>H<sub>13</sub>ClO<sub>3</sub>Na [M+Na]<sup>+</sup> 335.0445, Found 335.0443.

### 2,11-Dimethoxyindeno[1,2-b]chromen-10(11H)-one (2h)

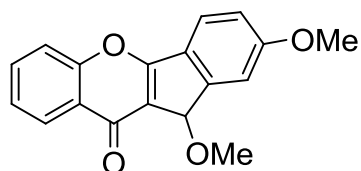

**2h**

White solid in 90% yield (EtOAc/petroleum ether = 1:8): Mp 132.5–134.4 °C; <sup>1</sup>H NMR (600 MHz, CDCl<sub>3</sub>)  $\delta$  8.34 (dd,  $J$  = 7.9, 1.6 Hz, 1H), 7.71 – 7.64 (m, 2H), 7.58 (d,  $J$  = 8.3 Hz, 1H), 7.49 – 7.43 (m, 1H), 7.24 (d,  $J$  = 2.1 Hz, 1H), 7.02 (dd,  $J$  = 8.4, 2.3 Hz, 1H), 5.61 (s, 1H), 3.92 (s, 3H), 3.45 (s, 3H); <sup>13</sup>C NMR (150 MHz, CDCl<sub>3</sub>)  $\delta$  174.21, 166.85, 163.30, 156.25, 147.17, 133.16, 126.44, 126.19, 125.67, 125.61, 122.22, 119.11, 118.15, 115.81, 111.22, 78.49, 55.93, 55.45; IR (thin film, cm<sup>-1</sup>) 3437, 2925, 2852, 2357, 1644, 1620, 1553, 1460, 1429, 1384, 1295, 1272, 1239, 1139, 1116, 1076, 1026, 764, 689; HRMS (ESI):  $m/z$  Calcd. for C<sub>18</sub>H<sub>14</sub>O<sub>4</sub>Na [M+Na]<sup>+</sup> 317.0784, Found 317.0780.

### 2-Chloro-11-methoxyindeno[1,2-b]chromen-10(11H)-one (2i)

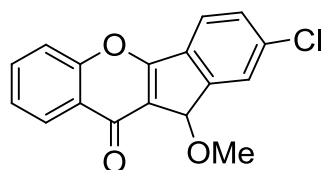

**2i**

White solid in 90% yield (EtOAc/petroleum ether = 1:8): Mp 169.4–171.2 °C; <sup>1</sup>H NMR (600 MHz, CDCl<sub>3</sub>)  $\delta$  8.34 (dd,  $J$  = 7.9, 1.5 Hz, 1H), 7.73 – 7.69 (m, 3H), 7.60 (d,  $J$  = 8.2 Hz, 1H), 7.51 – 7.46 (m, 2H), 5.61 (s, 1H), 3.51 (s, 3H); <sup>13</sup>C NMR (150 MHz, CDCl<sub>3</sub>)  $\delta$  174.57, 165.43, 156.27, 146.19, 138.01, 133.62, 132.37, 129.94, 126.52, 126.38, 125.94, 125.57, 121.92, 120.87, 118.30, 78.59, 56.21; IR (thin film, cm<sup>-1</sup>) 3440, 2923, 2853, 1646, 1552, 1461, 1430, 1384, 1121, 1086, 759; HRMS (ESI):  $m/z$  Calcd. for C<sub>17</sub>H<sub>11</sub>ClO<sub>3</sub>Na [M+Na]<sup>+</sup> 321.0289, Found 321.0292.

### 2-Fluoro-11-methoxyindeno[1,2-b]chromen-10(11H)-one (2j)

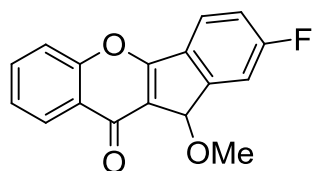

**2j**

White solid in 92% yield (EtOAc/petroleum ether = 1:8): Mp 153.5–154.8 °C; <sup>1</sup>H NMR (600 MHz, CDCl<sub>3</sub>)  $\delta$  8.34 (dd,  $J$  = 7.9, 1.6 Hz, 1H), 7.75 (dd,  $J$  = 8.3, 4.8 Hz, 1H), 7.73 – 7.68 (m, 1H), 7.60

(d,  $J = 7.9$  Hz, 1H), 7.50 – 7.45 (m, 1H), 7.41 (dd,  $J = 8.0, 2.2$  Hz, 1H), 7.21 (td,  $J = 8.6, 2.3$  Hz, 1H), 5.61 (s, 1H), 3.50 (s, 3H);  $^{13}\text{C}$  NMR (150 MHz,  $\text{CDCl}_3$ )  $\delta$  174.37, 165.62, 165.39 (d,  $J = 251.9$  Hz), 156.27, 147.43 (d,  $J = 7.5$  Hz), 134.32 (d,  $J = 13.5$  Hz), 133.52, 129.39 (d,  $J = 12.0$  Hz), 126.54, 125.91, 125.51, 122.54 (d,  $J = 9.3$  Hz), 118.26, 116.88 (d,  $J = 22.5$  Hz), 113.84 (d,  $J = 22.5$  Hz), 78.50 (d,  $J = 1.8$  Hz), 56.06; IR (thin film,  $\text{cm}^{-1}$ ) 3427, 2921, 2851, 1651, 1627, 1600, 1460, 1438, 1264, 1226, 1110, 1062, 763, 688; HRMS (ESI):  $m/z$  Calcd. for  $\text{C}_{17}\text{H}_{11}\text{FO}_3\text{Na}$   $[\text{M}+\text{Na}]^+$  305.0584, Found 305.0581.

### 7,11-Dimethoxyindeno[1,2-b]chromen-10(11H)-one (2k)

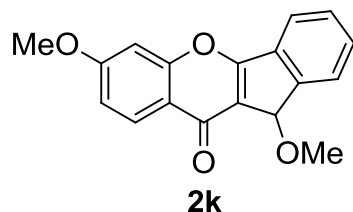

White solid in 92% yield (EtOAc/petroleum ether = 1:8): Mp 137.2–139.8 °C;  $^1\text{H}$  NMR (600 MHz,  $\text{CDCl}_3$ )  $\delta$  8.27 – 8.21 (m, 1H), 7.73 (d,  $J = 7.2$  Hz, 1H), 7.68 (d,  $J = 7.2$  Hz, 1H), 7.53 (td,  $J = 7.4, 1.2$  Hz, 1H), 7.51 – 7.47 (m, 1H), 7.02 (dd,  $J = 4.7, 2.4$  Hz, 2H), 5.61 (s, 1H), 3.94 (s, 3H), 3.47 (s, 3H);  $^{13}\text{C}$  NMR (150 MHz,  $\text{CDCl}_3$ )  $\delta$  174.36, 166.06, 163.93, 158.00, 144.28, 134.04, 131.26, 129.44, 127.72, 125.62, 120.70, 120.54, 119.40, 114.38, 101.14, 78.75, 56.01, 55.72; IR (thin film,  $\text{cm}^{-1}$ ) 3430, 2923, 2856, 1643, 1630, 1559, 1470, 1462, 1434, 1102, 1060, 762, 734; HRMS (ESI):  $m/z$  Calcd. for  $\text{C}_{18}\text{H}_{15}\text{O}_4$   $[\text{M}+\text{H}]^+$  295.0965, Found 295.0968.

### 11-Methoxy-6,8-dimethylindeno[1,2-b]chromen-10(11H)-one (2l)

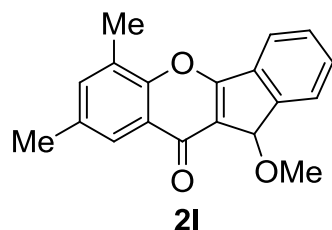

White solid in 90% yield (EtOAc/petroleum ether = 1:8): Mp 172.1–173.9 °C;  $^1\text{H}$  NMR (600 MHz,  $\text{CDCl}_3$ )  $\delta$  7.97 (s, 1H), 7.77 (d,  $J = 7.3$  Hz, 1H), 7.70 (d,  $J = 7.3$  Hz, 1H), 7.55 (t,  $J = 7.3$  Hz, 1H), 7.51 (t,  $J = 7.4$  Hz, 1H), 7.35 (s, 1H), 5.66 (s, 1H), 3.44 (s, 3H), 2.58 (s, 3H), 2.44 (s, 3H);  $^{13}\text{C}$  NMR (150 MHz,  $\text{CDCl}_3$ )  $\delta$  175.18, 166.03, 153.03, 144.43, 135.81, 135.17, 134.28, 131.39, 129.44, 127.36, 125.68, 125.28, 123.60, 120.78, 120.15, 78.73, 55.48, 21.07, 15.68; IR (thin film,  $\text{cm}^{-1}$ ) 3421, 2921, 2851, 2827, 1639, 1608, 1564, 1470, 1442, 1382, 1264, 1191, 1109, 1083, 767, 741, 728, 580; HRMS (ESI):  $m/z$  Calcd. for  $\text{C}_{19}\text{H}_{16}\text{O}_3\text{Na}$   $[\text{M}+\text{Na}]^+$  315.0992, Found 315.0992.

### 11-Ethoxyindeno[1,2-b]chromen-10(11H)-one (2m)

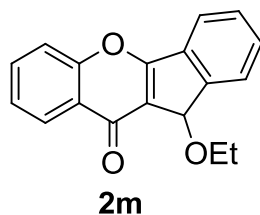

White solid in 85% yield (EtOAc/petroleum ether = 1:8): Mp 121.1–121.9 °C; <sup>1</sup>H NMR (600 MHz, CDCl<sub>3</sub>) δ 8.34 (d, *J* = 7.8 Hz, 1H), 7.77 (d, *J* = 7.4 Hz, 1H), 7.70 (dd, *J* = 7.0, 4.0 Hz, 2H), 7.61 (d, *J* = 8.3 Hz, 1H), 7.55 (t, *J* = 7.4 Hz, 1H), 7.50 (t, *J* = 7.5 Hz, 1H), 7.47 (t, *J* = 7.5 Hz, 1H), 5.65 (s, 1H), 3.87 (dq, *J* = 14.1, 7.1 Hz, 1H), 3.80 (dq, *J* = 14.2, 7.0 Hz, 1H), 1.27 (t, *J* = 7.0 Hz, 3H); <sup>13</sup>C NMR (150 MHz, CDCl<sub>3</sub>) δ 174.75, 166.36, 156.32, 145.08, 133.79, 133.38, 131.56, 129.40, 126.48, 125.77, 125.73, 125.65, 121.45, 120.93, 118.30, 77.84, 64.59, 15.85; IR (thin film, cm<sup>-1</sup>) 3423, 3058, 2969, 2925, 2856, 1645, 1609, 1555, 1483, 1464, 1429, 1104, 1077, 758; HRMS (ESI): *m/z* Calcd. for C<sub>18</sub>H<sub>14</sub>O<sub>3</sub>Na [M+Na]<sup>+</sup> 301.0835, Found 301.0836.

### 11-(4-Methoxyphenyl)indeno[1,2-b]chromen-10(11H)-one (2n)

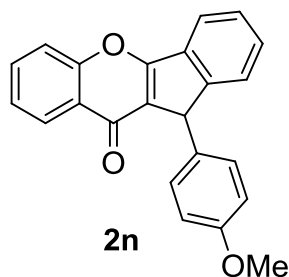

White solid in 97% yield (EtOAc/petroleum ether = 1:6): Mp 182.1–184.2 °C; <sup>1</sup>H NMR (600 MHz, CDCl<sub>3</sub>) δ 8.27 (dd, *J* = 7.9, 1.6 Hz, 1H), 7.90 – 7.88 (m, 1H), 7.71 – 7.67 (m, 1H), 7.66 – 7.63 (m, 1H), 7.50 – 7.47 (m, 2H), 7.44 – 7.41 (m, 2H), 7.16 – 7.12 (m, 2H), 6.83 – 6.79 (m, 2H), 5.13 (s, 1H), 3.76 (s, 3H); <sup>13</sup>C NMR (150 MHz, CDCl<sub>3</sub>) δ 174.52, 164.87, 158.86, 156.49, 149.38, 134.53, 133.14, 130.97, 129.54, 129.11, 127.92, 126.36, 125.73, 125.70, 125.35, 124.76, 120.93, 118.27, 114.27, 55.33, 49.50; IR (thin film, cm<sup>-1</sup>) 3430, 2920, 2851, 1643, 1622, 1462, 1434, 1384, 1248, 1140, 762, 619; HRMS (ESI): *m/z* Calcd. for C<sub>23</sub>H<sub>16</sub>O<sub>3</sub>Na [M+Na]<sup>+</sup> 363.0992, Found 363.0991.

### 11-(4-Methoxyphenyl)-8-methylindeno[1,2-b]chromen-10(11H)-one (2o)

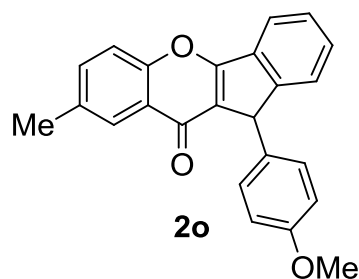

White solid in 97% yield (EtOAc/petroleum ether = 1:6): Mp 199.2–200.6 °C; <sup>1</sup>H NMR (600 MHz, CDCl<sub>3</sub>) δ 8.04 (d, *J* = 1.1 Hz, 1H), 7.88 – 7.86 (m, 1H), 7.54 (d, *J* = 8.5 Hz, 1H), 7.50 – 7.46 (m, 3H), 7.42 – 7.40 (m, 1H), 7.15 – 7.11 (m, 2H), 6.82 – 6.78 (m, 2H), 5.12 (s, 1H), 3.75 (s, 3H), 2.46 (s, 3H); <sup>13</sup>C NMR (150 MHz, CDCl<sub>3</sub>) δ 174.64, 164.82, 158.82, 154.75, 149.36, 135.28, 134.60,

134.28, 130.87, 129.68, 129.07, 127.87, 125.79, 125.66, 125.36, 124.59, 120.88, 118.00, 114.25, 55.34, 49.44, 21.11; IR (thin film,  $\text{cm}^{-1}$ ) 3433, 2922, 2851, 1642, 1615, 1556, 1511, 1478, 1451, 1408, 1299, 1274, 1249, 1226, 1177, 1149, 1097, 1034, 826, 574, 547; HRMS (ESI):  $m/z$  Calcd. for  $\text{C}_{24}\text{H}_{19}\text{O}_3$   $[\text{M}+\text{H}]^+$  355.1329, Found 355.1343.

**11-(4-Methoxyphenyl)-6,8-dimethylindeno[1,2-b]chromen-10(11H)-one (2p)**

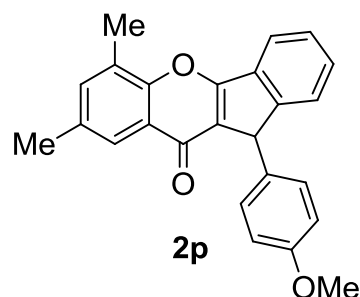

White solid in 98% yield (EtOAc/petroleum ether = 1:6): Mp 201.2–203.1 °C;  $^1\text{H}$  NMR (600 MHz,  $\text{CDCl}_3$ )  $\delta$  7.88 (dd,  $J = 6.3, 2.0$  Hz, 2H), 7.50–7.45 (m, 2H), 7.42 (d,  $J = 6.6$  Hz, 1H), 7.34 (s, 1H), 7.13 (d,  $J = 8.7$  Hz, 2H), 6.79 (d,  $J = 8.7$  Hz, 2H), 5.12 (s, 1H), 3.75 (s, 3H), 2.62 (s, 3H), 2.41 (s, 3H);  $^{13}\text{C}$  NMR (150 MHz,  $\text{CDCl}_3$ )  $\delta$  174.96, 164.49, 158.81, 153.16, 149.36, 135.50, 134.77, 134.66, 130.80, 129.75, 129.06, 127.82, 127.29, 125.68, 125.29, 124.34, 123.44, 120.73, 114.25, 55.34, 49.43, 21.06, 15.74; IR (thin film,  $\text{cm}^{-1}$ ) 3431, 2920, 2851, 1639, 1609, 1510, 1469, 1437, 1384, 1248, 1177, 1156, 1102, 1035, 765, 694, 618, 545, 504; HRMS (ESI):  $m/z$  Calcd. for  $\text{C}_{25}\text{H}_{21}\text{O}_3$   $[\text{M}+\text{H}]^+$  369.1485, Found 369.1482.

**7-Methoxy-11-(4-methoxyphenyl)indeno[1,2-b]chromen-10(11H)-one (2q)**

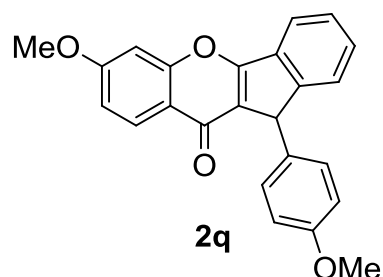

White solid in 96% yield (EtOAc/petroleum ether = 1:6): Mp 188.5–190.6 °C;  $^1\text{H}$  NMR (600 MHz,  $\text{CDCl}_3$ )  $\delta$  8.16 (d,  $J = 8.8$  Hz, 1H), 7.84 (dd,  $J = 6.4, 1.7$  Hz, 1H), 7.50–7.44 (m, 2H), 7.40 (d,  $J = 6.9$  Hz, 1H), 7.13 (t,  $J = 5.8$  Hz, 2H), 7.06 (d,  $J = 2.3$  Hz, 1H), 6.98 (dd,  $J = 8.8, 2.4$  Hz, 1H), 6.82–6.78 (m, 2H), 5.09 (s, 1H), 3.94 (s, 3H), 3.75 (s, 3H);  $^{13}\text{C}$  NMR (150 MHz,  $\text{CDCl}_3$ )  $\delta$  174.20, 164.46, 163.74, 158.82, 158.16, 149.22, 134.62, 130.66, 129.65, 129.09, 127.83, 127.60, 125.66, 124.65, 120.64, 119.52, 114.25, 114.07, 101.04, 55.98, 55.33, 49.44; IR (thin film,  $\text{cm}^{-1}$ ) 3429, 2920, 2851, 1640, 1625, 1611, 1440, 1384, 1244, 1161, 838, 761, 618; HRMS (ESI):  $m/z$  Calcd. for  $\text{C}_{24}\text{H}_{18}\text{O}_4\text{Na}$   $[\text{M}+\text{Na}]^+$  303.1097, Found 303.1098.

**8-Chloro-11-(4-methoxyphenyl)indeno[1,2-b]chromen-10(11H)-one (2r)**

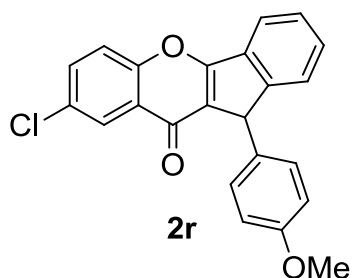

White solid in 99% yield (EtOAc/petroleum ether = 1:6): Mp 202.2–203.8 °C; <sup>1</sup>H NMR (600 MHz, CDCl<sub>3</sub>) δ 8.21 (d, *J* = 2.4 Hz, 1H), 7.87 (dd, *J* = 5.8, 2.8 Hz, 1H), 7.63 (dd, *J* = 8.9, 2.5 Hz, 1H), 7.60 (d, *J* = 8.8 Hz, 1H), 7.51 – 7.48 (m, 2H), 7.43 – 7.41 (m, 1H), 7.12 (d, *J* = 8.7 Hz, 2H), 6.81 (d, *J* = 8.7 Hz, 2H), 5.12 (s, 1H), 3.76 (s, 3H); <sup>13</sup>C NMR (150 MHz, CDCl<sub>3</sub>) δ 173.18, 165.14, 158.94, 154.79, 149.39, 134.14, 133.25, 131.33, 131.27, 129.17, 129.08, 128.03, 126.78, 125.84, 125.76, 124.71, 121.01, 119.92, 114.31, 55.34, 49.48; IR (thin film, cm<sup>-1</sup>) 3429, 2920, 2851, 1644, 1619, 1552, 1510, 1462, 1442, 1384, 1252, 1119, 821, 772, 700, 619; HRMS (ESI): *m/z* Calcd. for C<sub>23</sub>H<sub>15</sub>ClO<sub>3</sub>Na [M+Na]<sup>+</sup> 397.0602, Found 397.0615.

### 2-Methoxy-11-(4-methoxyphenyl)indeno[1,2-b]chromen-10(11H)-one (2s)

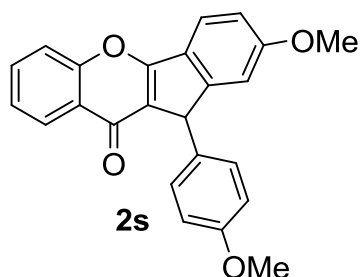

White solid in 97% yield (EtOAc/petroleum ether = 1:6): Mp 194.1–195.1 °C; <sup>1</sup>H NMR (600 MHz, CDCl<sub>3</sub>) δ 8.25 (dd, *J* = 7.9, 1.4 Hz, 1H), 7.78 (d, *J* = 8.4 Hz, 1H), 7.69 – 7.64 (m, 1H), 7.61 (d, *J* = 7.9 Hz, 1H), 7.43 – 7.37 (m, 1H), 7.14 (d, *J* = 8.7 Hz, 2H), 7.02 (dd, *J* = 8.4, 2.2 Hz, 1H), 6.92 (d, *J* = 2.0 Hz, 1H), 6.82 (s, 1H), 6.80 (s, 1H), 5.07 (s, 1H), 3.83 (s, 3H), 3.76 (s, 3H); <sup>13</sup>C NMR (150 MHz, CDCl<sub>3</sub>) δ 173.95, 165.12, 162.73, 158.84, 156.39, 152.00, 132.85, 129.91, 129.16, 127.03, 126.30, 125.68, 125.25, 123.44, 122.07, 118.11, 114.77, 114.29, 110.88, 55.80, 55.35, 49.44; IR (thin film, cm<sup>-1</sup>) 3435, 3006, 2920, 2837, 1646, 1621, 1551, 1511, 1461, 1433, 1298, 1278, 1251, 1235, 1177, 1152, 1100, 1030, 831, 766, 688, 592, 574, 542; HRMS (ESI): *m/z* Calcd. for C<sub>24</sub>H<sub>19</sub>O<sub>4</sub> [M+H]<sup>+</sup> 371.1278, Found 371.1294.

### 2-Methoxy-11-(4-methoxyphenyl)-8-methylindeno[1,2-b]chromen-10(11H)-one (2t)

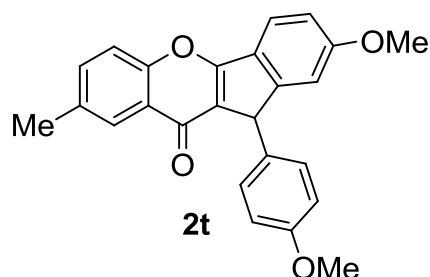

White solid in 98% yield (EtOAc/petroleum ether = 1:6): Mp 196.4–198.4 °C; <sup>1</sup>H NMR (600 MHz, CDCl<sub>3</sub>) δ 8.03 (d, *J* = 1.0 Hz, 1H), 7.77 (d, *J* = 8.4 Hz, 1H), 7.48 (dt, *J* = 8.5, 5.3 Hz, 2H), 7.16 – 7.12 (m, 2H), 7.01 (dd, *J* = 8.4, 2.2 Hz, 1H), 6.92 (d, *J* = 2.0 Hz, 1H), 6.82 – 6.79 (m, 2H), 5.07 (s, 1H), 3.82 (s, 3H), 3.76 (s, 3H), 2.45 (s, 3H); <sup>13</sup>C NMR (150 MHz, CDCl<sub>3</sub>) δ 174.06, 165.05, 162.63, 158.80, 154.63, 151.95, 135.12, 133.96, 130.03, 129.11, 127.10, 125.76, 125.31, 123.28, 122.00, 117.83, 114.68, 114.27, 110.86, 55.78, 55.35, 49.38, 21.10; IR (thin film, cm<sup>-1</sup>) 3434, 2920, 2850, 1641, 1613, 1511, 1449, 1276, 1249, 1176, 1150, 1098, 1033, 821, 591, 574, 548; HRMS (ESI): *m/z* Calcd. for C<sub>25</sub>H<sub>21</sub>O<sub>4</sub> [M+H]<sup>+</sup> 385.1434, Found 385.1435.

**2-Methoxy-11-(4-methoxyphenyl)-6,8-dimethylindeno[1,2-b]chromen-10(11H)-one (2u)**

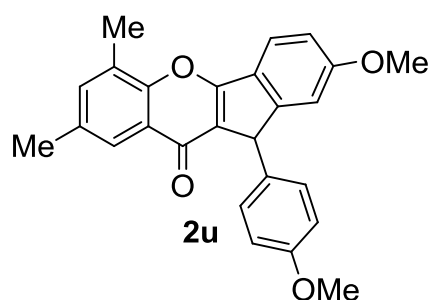

White solid in 95% yield (EtOAc/petroleum ether = 1:6): Mp 141.6–142.8 °C; <sup>1</sup>H NMR (600 MHz, CDCl<sub>3</sub>) δ 7.87 (s, 1H), 7.77 (d, *J* = 8.4 Hz, 1H), 7.31 (s, 1H), 7.14 (d, *J* = 8.6 Hz, 2H), 7.01 (dd, *J* = 8.4, 2.2 Hz, 1H), 6.92 (d, *J* = 1.8 Hz, 1H), 6.80 (d, *J* = 8.6 Hz, 2H), 5.06 (s, 1H), 3.82 (s, 3H), 3.75 (s, 3H), 2.59 (s, 3H), 2.40 (s, 3H); <sup>13</sup>C NMR (150 MHz, CDCl<sub>3</sub>) δ 174.38, 164.74, 162.59, 158.78, 153.03, 151.95, 135.22, 134.51, 130.09, 129.11, 127.27, 127.10, 125.21, 123.41, 123.03, 121.85, 114.69, 114.26, 110.83, 55.79, 55.35, 49.37, 21.05, 15.73; IR (thin film, cm<sup>-1</sup>) 3431, 2921, 2851, 1641, 1605, 1511, 1451, 1279, 1251, 1230, 1176, 1159, 1098, 1031, 824, 724, 578, 542; HRMS (ESI): *m/z* Calcd. for C<sub>26</sub>H<sub>23</sub>O<sub>4</sub> [M+H]<sup>+</sup> 399.1591, Found 399.1590.

**2,7-Dimethoxy-11-(4-methoxyphenyl)indeno[1,2-b]chromen-10(11H)-one (2v)**

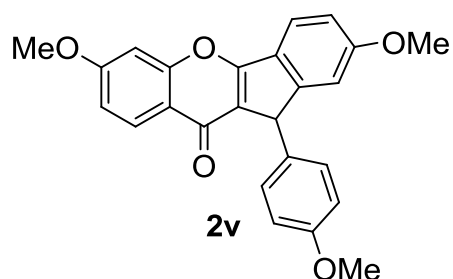

White solid in 96% yield (EtOAc/petroleum ether = 1:6): Mp 199.8–201.7 °C; <sup>1</sup>H NMR (600 MHz, CDCl<sub>3</sub>) δ 8.15 (d, *J* = 8.8 Hz, 1H), 7.74 (d, *J* = 8.4 Hz, 1H), 7.14 (d, *J* = 8.6 Hz, 2H), 7.05 – 6.96 (m, 3H), 6.92 (d, *J* = 1.9 Hz, 1H), 6.81 (d, *J* = 8.6 Hz, 2H), 5.05 (s, 1H), 3.94 (s, 3H), 3.82 (s, 3H), 3.76 (s, 3H); <sup>13</sup>C NMR (150 MHz, CDCl<sub>3</sub>) δ 173.68, 164.72, 163.52, 162.47, 158.78, 158.00, 151.79, 129.99, 129.13, 127.51, 127.11, 123.24, 121.73, 119.40, 114.60, 114.25, 113.84, 110.89, 100.99, 55.94, 55.76, 55.32, 49.36; IR (thin film, cm<sup>-1</sup>) 3431, 2920, 2850, 1643, 1622, 1511, 1448, 1280, 1246, 1169, 1095, 1029, 835, 685; HRMS (ESI): *m/z* Calcd. for C<sub>25</sub>H<sub>21</sub>O<sub>5</sub> [M+H]<sup>+</sup> 401.1384, Found 401.1382.

**8-Chloro-2-methoxy-11-(4-methoxyphenyl)indeno[1,2-b]chromen-10(11H)-one (2w)**

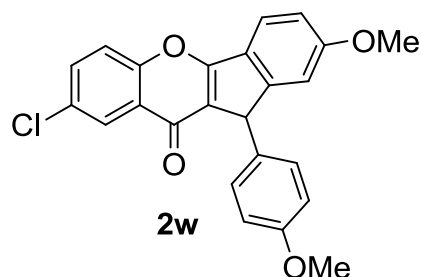

White solid in 94% yield (EtOAc/petroleum ether = 1:6): Mp 187.5–188.3 °C; <sup>1</sup>H NMR (600 MHz, CDCl<sub>3</sub>) δ 8.19 (d, *J* = 2.5 Hz, 1H), 7.77 (d, *J* = 8.4 Hz, 1H), 7.60 (dd, *J* = 8.9, 2.5 Hz, 1H), 7.56 (d, *J* = 8.9 Hz, 1H), 7.12 (d, *J* = 8.7 Hz, 2H), 7.02 (dd, *J* = 8.5, 2.2 Hz, 1H), 6.92 (d, *J* = 1.9 Hz, 1H), 6.81 (d, *J* = 8.7 Hz, 2H), 5.06 (s, 1H), 3.83 (s, 3H), 3.76 (s, 3H); <sup>13</sup>C NMR (150 MHz, CDCl<sub>3</sub>) δ 172.58, 165.37, 162.96, 158.92, 154.68, 152.06, 132.93, 131.19, 129.55, 129.12, 126.78, 126.61, 125.80, 123.37, 122.18, 119.74, 114.94, 114.33, 110.89, 55.82, 55.35, 49.41; IR (thin film, cm<sup>-1</sup>) 3432, 2920, 2850, 1646, 1617, 1548, 1511, 1450, 1251, 1179, 1148, 1098, 1031, 824, 685, 546; HRMS (ESI): *m/z* Calcd. for C<sub>24</sub>H<sub>17</sub>ClO<sub>4</sub>Na [M+Na]<sup>+</sup> 427.0707, Found 427.0698.

**2-Methoxy-11-(4-phenoxyphenyl)indeno[1,2-b]chromen-10(11H)-one (2x)**

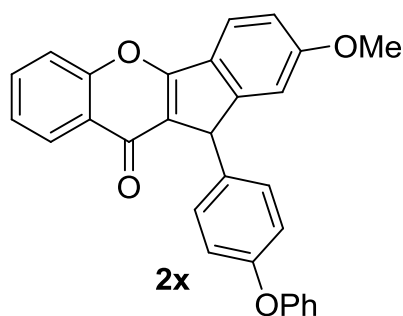

White solid in 97% yield (EtOAc/petroleum ether = 1:5): Mp 161.2–162.2 °C; <sup>1</sup>H NMR (600 MHz, CDCl<sub>3</sub>) δ 8.27 (dd, *J* = 7.9, 1.6 Hz, 1H), 7.79 (d, *J* = 8.4 Hz, 1H), 7.69 – 7.65 (m, 1H), 7.63 – 7.60 (m, 1H), 7.44 – 7.39 (m, 1H), 7.30 (dd, *J* = 8.5, 7.5 Hz, 2H), 7.19 (d, *J* = 8.6 Hz, 2H), 7.07 (t, *J* = 7.4 Hz, 1H), 7.04 – 7.00 (m, 2H), 7.00 (s, 1H), 6.94 (d, *J* = 2.0 Hz, 1H), 6.91 (d, *J* = 8.6 Hz, 2H), 5.10 (s, 1H), 3.84 (s, 3H); <sup>13</sup>C NMR (150 MHz, CDCl<sub>3</sub>) δ 173.91, 165.22, 162.73, 157.19, 156.48, 156.35, 151.66, 132.91, 132.70, 129.78, 126.95, 126.23, 125.61, 125.30, 123.32, 123.14, 122.13, 119.16, 119.01, 118.13, 114.65, 111.04, 55.80, 49.42; IR (thin film, cm<sup>-1</sup>) 3428, 2920, 2851, 1643, 1618, 1460, 1384, 1276, 1238, 1131, 878, 750, 619; HRMS (ESI): *m/z* Calcd. for C<sub>29</sub>H<sub>21</sub>O<sub>4</sub> [M+H]<sup>+</sup> 433.1434, Found 433.1432.

**11-(2,4-Dimethoxyphenyl)-2-methoxyindeno[1,2-b]chromen-10(11H)-one (2y)**



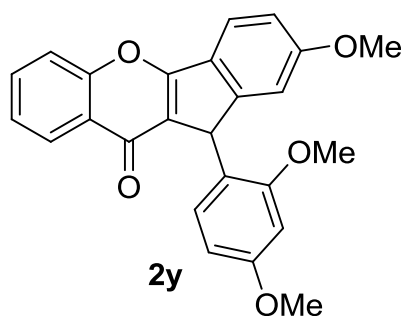

White solid in 98% yield (EtOAc/petroleum ether = 1:5): Mp 205.1–206.8 °C;  $^1\text{H}$  NMR (600 MHz,  $\text{CDCl}_3$ )  $\delta$  8.28 (dd,  $J = 7.9, 1.4$  Hz, 1H), 7.75 (d,  $J = 8.4$  Hz, 1H), 7.70 – 7.64 (m, 1H), 7.62 (d,  $J = 8.2$  Hz, 1H), 7.46 – 7.38 (m,  $J = 1$  Hz), 7.04 (s, 1H), 6.97 (dd,  $J = 8.4, 2.2$  Hz, 1H), 6.67 (s, 1H), 6.57 (s, 1H), 6.29 (d,  $J = 8.0$  Hz, 1H), 5.56 (s, 1H), 3.94 (s, 3H), 3.81 (s, 3H), 3.75 (s, 3H);  $^{13}\text{C}$  NMR (150 MHz,  $\text{CDCl}_3$ )  $\delta$  173.81, 165.52, 162.53, 160.00, 158.61, 156.39, 152.77, 132.73, 126.69, 126.35, 125.59, 125.14, 122.73, 121.85, 118.58, 118.10, 114.08, 110.83, 104.80, 99.52, 55.90, 55.65, 55.41; IR (thin film,  $\text{cm}^{-1}$ ) 3435, 2920, 2851, 1642, 1619, 1461, 1446, 1433, 1384, 1133, 879, 837, 766, 619; HRMS (ESI):  $m/z$  Calcd. for  $\text{C}_{25}\text{H}_{21}\text{O}_5$   $[\text{M}+\text{H}]^+$  401.1384, Found 401.1391.

## 6. General Procedures for the Preparation of Indeno-quinolin-4-ones

### (4a-4l) and Characterization Data

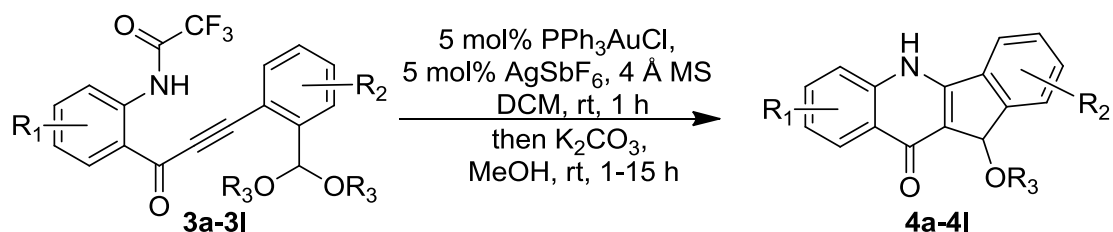

The gold catalyst was generated in a round bottom flask by addition of  $\text{PPh}_3\text{AuCl}$  (0.01 mmol, 5 mg),  $\text{AgSbF}_6$  (0.01 mmol, 4 mg), activated 4 Å molecular sieves (20 mg) and dry  $\text{CH}_2\text{Cl}_2$  (5 mL) under nitrogen atmosphere. The mixture was stirred for 30 min before the substrates **3a-3l** (0.2 mmol) in dry  $\text{CH}_2\text{Cl}_2$  (5 mL) were added via a syringe. The mixture was stirred for 1 h at room temperature before the addition of MeOH (0.5 mL) and  $\text{K}_2\text{CO}_3$  (2 mmol, 276 mg). The mixture was stirred at room temperature till the consumption of the starting material. The mixture was filtered through filter paper, and washed with MeOH for three times. The combined filtrates were removed in vacuo, and the residue was purified by a flash column chromatography on silica gel to afford the products **4a-4l**.

### 11-Methoxy-5H-indeno[1,2-b]quinolin-10(11H)-one (4a)

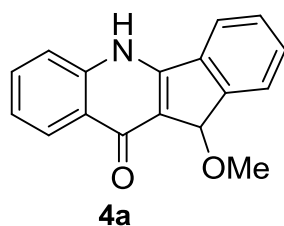

White solid in 65% yield (MeOH/DCM = 1:130): Mp 333.4–335.2 °C (decomposed); <sup>1</sup>H NMR (600 MHz, DMSO-*d*<sub>6</sub>) δ 12.47 (s, 1H), 8.20 (d, *J* = 8.0 Hz, 1H), 8.05 (d, *J* = 7.0 Hz, 1H), 7.70 (d, *J* = 3.7 Hz, 2H), 7.66 (d, *J* = 6.9 Hz, 1H), 7.60 – 7.52 (m, 2H), 7.38 (dt, *J* = 8.0, 4.0 Hz, 1H), 5.55 (s, 1H), 3.25 (s, 3H); <sup>13</sup>C NMR (150 MHz, DMSO-*d*<sub>6</sub>) δ 173.47, 150.48, 145.10, 140.08, 134.58, 131.64, 130.51, 129.13, 126.78, 125.41, 125.26, 123.52, 121.24, 118.48, 118.00, 79.05, 54.27; IR (thin film, cm<sup>-1</sup>) 3426, 2920, 2851, 1632, 1464, 1384, 1131, 879, 619; HRMS (ESI): *m/z* Calcd. for C<sub>17</sub>H<sub>13</sub>NO<sub>2</sub>Na [M+Na]<sup>+</sup> 286.0838, Found 286.0844.

**11-Methoxy-3-methyl-5H-indeno[1,2-b]quinolin-10(11H)-one (4b)**

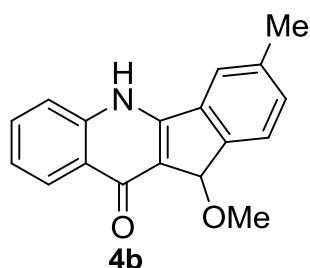

White solid in 73% yield (MeOH/DCM = 1:130): Mp 338.0–339.2 °C (decomposed); <sup>1</sup>H NMR (600 MHz, DMSO-*d*<sub>6</sub>) δ 8.20 (d, *J* = 6.1 Hz, 1H), 7.97 – 7.80 (m, 1H), 7.75 – 7.65 (m, 1H), 7.60 (t, *J* = 7.1 Hz, 1H), 7.51 – 7.40 (m, 1H), 7.33 – 7.25 (m, 2H), 5.52 (s, 1H), 3.24 – 3.10 (m, 3H), 2.43 – 2.33 (m, 3H); <sup>13</sup>C NMR (150 MHz, DMSO-*d*<sub>6</sub>) δ 172.65, 172.58, 145.39, 142.19, 139.86, 138.26, 130.49, 130.40, 129.50, 127.45, 127.31, 125.90, 124.98, 124.95, 122.60, 122.54, 121.59, 120.99, 117.35, 117.34, 116.87, 116.86, 78.91, 78.73, 53.74, 53.43, 21.34, 21.10; IR (thin film, cm<sup>-1</sup>) 3425, 2920, 2851, 1632, 1577, 1509, 1469, 1384, 1123, 879, 811, 768, 619; HRMS (ESI): *m/z* Calcd. for C<sub>18</sub>H<sub>15</sub>NO<sub>2</sub>Na [M+Na]<sup>+</sup> 300.0995, Found 300.0993.

**2,11-Dimethoxy-5H-indeno[1,2-b]quinolin-10(11H)-one (4c)**

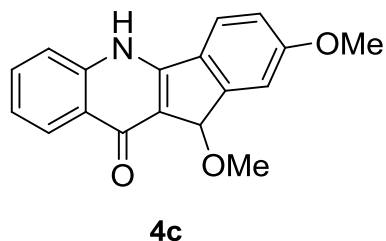

White solid in 66% yield (MeOH/DCM = 1:100): Mp 294.4–295.6 °C (decomposed); <sup>1</sup>H NMR (600 MHz, DMSO-*d*<sub>6</sub>) δ 12.42 – 12.33 (m, 1H), 8.18 (t, *J* = 7.5 Hz, 1H), 7.95 (d, *J* = 8.3 Hz, 1H), 7.68 – 7.62 (m, 2H), 7.41 – 7.30 (m, 1H), 7.19 (s, 1H), 7.13 – 7.04 (m, 1H), 5.51 – 5.46 (m, 1H), 3.86 (s, 3H), 3.27 – 3.19 (m, 3H); <sup>13</sup>C NMR (150 MHz, DMSO-*d*<sub>6</sub>) δ 173.31, 172.94, 161.81, 160.24, 150.81, 147.60, 139.99, 136.85, 131.59, 131.36, 126.80, 126.60, 126.19, 125.26, 125.20, 123.49, 123.33,

122.45, 118.27, 116.94, 116.30, 114.85, 111.15, 106.42, 78.83, 78.44, 55.64, 55.54, 54.03, 53.87; IR (thin film,  $\text{cm}^{-1}$ ) 3426, 2920, 2851, 1631, 1576, 1469, 1384, 1120, 879, 619; HRMS (ESI):  $m/z$  Calcd. for  $\text{C}_{18}\text{H}_{15}\text{NO}_3\text{Na}$   $[\text{M}+\text{Na}]^+$  316.0944, Found 316.0949.

#### 2-Fluoro-11-methoxy-5H-indeno[1,2-b]quinolin-10(11H)-one (4d)

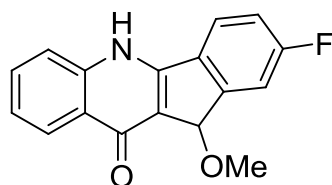

4d

White solid in 51% yield (MeOH/DCM = 1:130): Mp 352.2–352.7 °C (decomposed);  $^1\text{H}$  NMR (600 MHz,  $\text{DMSO}-d_6$ )  $\delta$  12.52 (s, 1H), 8.19 (dd,  $J = 7.8, 3.1$  Hz, 1H), 8.10 – 7.85 (m, 1H), 7.73 – 7.59 (m, 3H), 7.44 – 7.33 (m, 2H), 5.55 – 5.51 (m, 1H), 3.28 – 3.24 (m, 3H);  $^{13}\text{C}$  NMR (150 MHz,  $\text{DMSO}-d_6$ )  $\delta$  173.40, 173.19, 164.90 (d,  $J = 247.5$  Hz), 162.70 (d,  $J = 243.0$  Hz), 149.77 (d,  $J = 4.5$  Hz), 148.24 (d,  $J = 9.0$  Hz), 140.93 (d,  $J = 1.5$  Hz), 140.14 (d,  $J = 1.5$  Hz), 136.97, 136.89, 132.05 (d,  $J = 3.0$  Hz), 131.70 (d,  $J = 21.0$  Hz), 128.77 (d,  $J = 10.5$  Hz), 127.07 (d,  $J = 9.0$  Hz), 126.66 (d,  $J = 28.5$  Hz), 125.24 (d,  $J = 6.0$  Hz), 123.65, 123.57, 123.16, 123.10, 118.62 (d,  $J = 16.5$  Hz), 118.04 (d,  $J = 1.5$  Hz), 117.03, 116.88, 116.30, 116.14, 113.20, 113.05, 108.65, 108.49, 78.76, 78.46, 54.43, 54.28; IR (thin film,  $\text{cm}^{-1}$ ) 3424, 2920, 2851, 1631, 1577, 1470, 1384, 1133, 879, 774, 619; HRMS (ESI):  $m/z$  Calcd. for  $\text{C}_{17}\text{H}_{13}\text{FNO}_2\text{Na}$   $[\text{M}+\text{Na}]^+$  305.0822, Found 305.0842.

#### 2-Chloro-11-methoxy-5H-indeno[1,2-b]quinolin-10(11H)-one (4e)

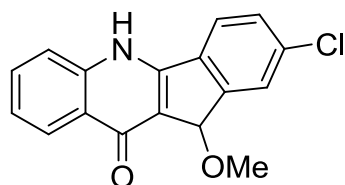

4e

White solid in 56% yield (MeOH/DCM = 1:130): Mp 336.1–336.9 °C (decomposed);  $^1\text{H}$  NMR (600 MHz,  $\text{DMSO}-d_6$ )  $\delta$  12.53 – 12.42 (m, 1H), 8.19 (d,  $J = 8.1$  Hz, 1H), 8.04 (d,  $J = 8.1$  Hz, 1H), 7.73 – 7.63 (m, 4H), 7.40 – 7.35 (m, 1H), 5.56 – 5.53 (m, 1H), 3.29 – 3.24 (m, 3H);  $^{13}\text{C}$  NMR (150 MHz,  $\text{DMSO}-d_6$ )  $\delta$  173.52, 173.43, 149.38, 149.03, 147.31, 143.74, 140.01, 139.96, 136.65, 135.30, 133.67, 133.46, 131.87, 131.77, 130.00, 129.31, 126.96, 126.74, 126.68, 125.61, 125.27, 125.24, 123.70, 123.64, 122.78, 121.32, 118.87, 118.53, 118.50, 118.17, 78.84, 78.65, 54.62, 54.44; IR (thin film,  $\text{cm}^{-1}$ ) 3425, 2920, 2851, 1629, 1579, 1524, 1467, 1384, 1338, 1272, 1128, 879, 764, 619, 516; HRMS (ESI):  $m/z$  Calcd. for  $\text{C}_{17}\text{H}_{12}\text{ClNO}_2\text{Na}$   $[\text{M}+\text{Na}]^+$  320.0448, Found 320.0452.

#### 8-Chloro-11-methoxy-5H-indeno[1,2-b]quinolin-10(11H)-one (4f)

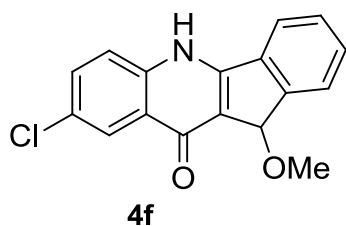

White solid in 54% yield (MeOH/DCM = 1:130): Mp 335.4–336.6 °C (decomposed); <sup>1</sup>H NMR (600 MHz, DMSO-*d*<sub>6</sub>) δ 12.65 (s, 1H), 8.11 (s, 1H), 8.03 (d, *J* = 6.8 Hz, 1H), 7.73 (s, 2H), 7.66 (d, *J* = 6.5 Hz, 1H), 7.60 – 7.54 (m, 2H), 5.55 (s, 1H), 3.25 (s, 3H); <sup>13</sup>C NMR (150 MHz, DMSO-*d*<sub>6</sub>) δ 172.11, 150.91, 145.11, 138.72, 134.25, 131.67, 130.77, 129.23, 128.19, 127.90, 125.48, 124.24, 121.35, 120.87, 118.28, 78.99, 54.39; IR (thin film, cm<sup>-1</sup>) 3425, 3081, 1920, 2851, 1635, 1573, 1508, 1468, 1384, 1160, 767, 703, 626, 582, 555; HRMS (ESI): *m/z* Calcd. for C<sub>17</sub>H<sub>12</sub>ClNO<sub>2</sub>Na [M+Na]<sup>+</sup> 320.0449, Found 320.0440.

**8-Chloro-2,11-dimethoxy-5H-indeno[1,2-b]quinolin-10(11H)-one (4g)**

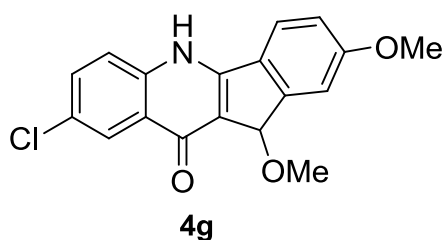

White solid in 50% yield (MeOH/DCM = 1:100): Mp 326.5–328.2 °C (decomposed); <sup>1</sup>H NMR (600 MHz, DMSO-*d*<sub>6</sub>) δ 12.59 – 12.46 (m, 1H), 8.08 (d, *J* = 5.9 Hz, 1H), 7.73 – 7.48 (m, 4H), 7.14 – 7.04 (m, 1H), 5.50 – 5.42 (m, 1H), 3.86 (s, 3H), 3.25 – 3.15 (m, 3H); <sup>13</sup>C NMR (150 MHz, DMSO-*d*<sub>6</sub>) δ 171.93, 171.52, 161.99, 160.25, 151.17, 150.71, 138.59, 136.86, 131.62, 131.36, 128.16, 127.99, 127.90, 127.74, 126.42, 126.26, 124.24, 124.19, 122.56, 122.52, 120.75, 120.58, 117.21, 116.58, 114.99, 111.14, 106.43, 78.75, 78.38, 55.67, 55.57, 54.16, 54.00; IR (thin film, cm<sup>-1</sup>) 3428, 2920, 2851, 1628, 1572, 1514, 1467, 1384, 1243, 1119, 879, 822, 685, 620, 541; HRMS (ESI): *m/z* Calcd. for C<sub>18</sub>H<sub>14</sub>ClNO<sub>3</sub>Na [M+Na]<sup>+</sup> 350.0554, Found 350.0554.

**11-Ethoxy-2-methoxy-5H-indeno[1,2-b]quinolin-10(11H)-one (4h)**

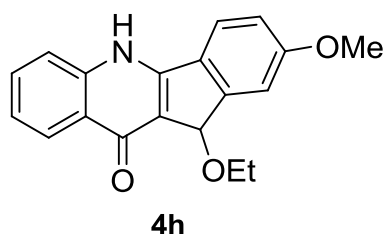

White solid in 87% yield (MeOH/DCM = 1:100): Mp 286.6–287.1 °C (decomposed); <sup>1</sup>H NMR (600 MHz, DMSO-*d*<sub>6</sub>) δ 12.41 – 12.31 (m, 1H), 8.18 (t, *J* = 8.3 Hz, 1H), 7.74 – 7.62 (m, 3H), 7.53 (d, *J* = 8.2 Hz, 1H), 7.36 (dt, *J* = 7.9, 4.5 Hz, 1H), 7.14 – 7.04 (m, 1H), 5.52 – 5.46 (m, 1H), 3.86 (d, *J* = 3.4 Hz, 3H), 3.64 – 3.53 (m, 2H), 1.12 – 1.05 (m, 3H); <sup>13</sup>C NMR (150 MHz, DMSO-*d*<sub>6</sub>) δ 173.33, 160.18, 150.14, 139.95, 137.60, 135.84, 131.62, 126.83, 126.20, 125.30, 123.47, 119.80, 118.39, 116.32, 106.35, 77.47, 62.25, 55.57, 15.70; IR (thin film, cm<sup>-1</sup>) 3424, 3262, 3066, 2922, 2851, 1631,

1573, 1503, 1470, 1341, 1241, 1109, 1067, 1029, 878, 815, 767, 697, 681; HRMS (ESI):  $m/z$  Calcd. for  $C_{19}H_{17}NO_3Na$   $[M+Na]^+$  330.1101, Found 330.1109.

**11-Ethoxy-5H-indeno[1,2-b]quinolin-10(11H)-one (4i)**

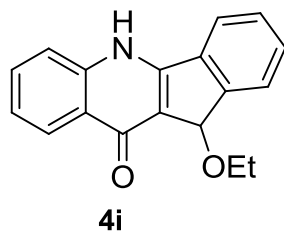

White solid in 51% yield (MeOH/DCM = 1:130): Mp 324.5–325.1 °C (decomposed);  $^1H$  NMR (600 MHz, DMSO- $d_6$ )  $\delta$  12.44 (s, 1H), 8.19 (d,  $J$  = 8.0 Hz, 1H), 8.04 (d,  $J$  = 6.7 Hz, 1H), 7.69 (d,  $J$  = 3.6 Hz, 2H), 7.65 (d,  $J$  = 6.6 Hz, 1H), 7.58 – 7.51 (m, 2H), 7.37 (dt,  $J$  = 8.0, 3.9 Hz, 1H), 5.56 (s, 1H), 3.64 (q,  $J$  = 6.9 Hz, 2H), 1.10 (t,  $J$  = 7.0 Hz, 3H);  $^{13}C$  NMR (150 MHz, DMSO- $d_6$ )  $\delta$  173.44, 150.27, 145.76, 140.04, 134.37, 131.59, 130.46, 128.99, 126.78, 125.38, 125.25, 123.46, 121.15, 118.87, 118.44, 78.03, 62.65, 15.69; IR (thin film,  $cm^{-1}$ ) 3429, 3068, 2920, 2851, 1630, 1575, 1508, 1470, 1384, 1116, 761, 619; HRMS (ESI):  $m/z$  Calcd. for  $C_{18}H_{15}NO_2Na$   $[M+Na]^+$  300.0995, Found 300.0999.

**11-Ethoxy-2-fluoro-5H-indeno[1,2-b]quinolin-10(11H)-one (4j)**

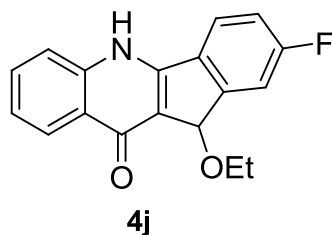

White solid in 48% yield (MeOH/DCM = 1:130): Mp 318.8–319.5 °C (decomposed);  $^1H$  NMR (600 MHz, DMSO- $d_6$ )  $\delta$  12.50 – 12.40 (m, 1H), 8.18 (dd,  $J$  = 7.0, 2.5 Hz, 1H), 8.08 – 7.81 (m, 1H), 7.78 – 7.62 (m, 3H), 7.43 – 7.33 (m, 2H), 5.57 – 5.50 (m, 1H), 3.70 – 3.57 (m, 2H), 1.14 – 1.06 (m, 3H);  $^{13}C$  NMR (150 MHz, DMSO- $d_6$ )  $\delta$  173.46, 173.21, 164.06 (d,  $J$  = 192.0 Hz), 162.43 (d,  $J$  = 189.0 Hz), 149.03 (d,  $J$  = 3.0 Hz), 148.90 (d,  $J$  = 9.0 Hz), 141.60 (d,  $J$  = 1.5 Hz), 139.94 (d,  $J$  = 7.5 Hz), 136.58, 136.52, 131.71 (d,  $J$  = 24.0 Hz), 130.62 (d,  $J$  = 1.5 Hz), 127.03 (d,  $J$  = 9.0 Hz), 126.68 (d,  $J$  = 27.0 Hz), 125.85 (d,  $J$  = 57.0 Hz), 125.27 (d,  $J$  = 7.5 Hz), 123.61, 123.51, 123.06, 123.00, 118.96 (d,  $J$  = 1.5 Hz), 118.43 (d,  $J$  = 9.0 Hz), 117.02, 116.87, 116.18, 116.02, 113.13, 112.98, 108.52, 108.36, 77.75, 77.45, 62.88, 62.73, 15.65, 15.63; IR (thin film,  $cm^{-1}$ ) 3426, 3071, 2921, 2851, 1633, 1632, 1574, 1508, 1470, 1341, 1109, 764, 696; HRMS (ESI):  $m/z$  Calcd. for  $C_{18}H_{14}FNO_2Na$   $[M+Na]^+$  318.0901, Found 318.0901.

**2,8-Dichloro-11-ethoxy-5H-indeno[1,2-b]quinolin-10(11H)-one (4k)**

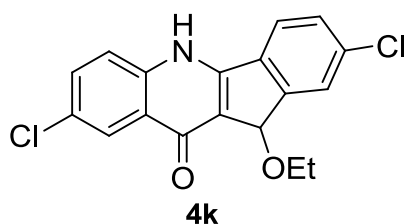

White solid in 52% yield (MeOH/DCM = 1:130): Mp 318.7–319.2 °C (decomposed); <sup>1</sup>H NMR (600 MHz, DMSO-*d*<sub>6</sub>) δ 12.64 – 12.51 (m, 1H), 8.08 – 7.94 (m, 2H), 7.69 (dd, *J* = 8.7, 2.4 Hz, 1H), 7.67 – 7.60 (m, 3H), 5.54 – 5.48 (m, 1H), 3.69 – 3.54 (m, 2H), 1.11 – 1.03 (m, 3H); <sup>13</sup>C NMR (150 MHz, DMSO-*d*<sub>6</sub>) δ 172.13, 172.05, 149.54, 149.18, 147.89, 144.35, 138.59, 138.53, 136.08, 135.48, 133.58, 132.91, 131.80, 131.71, 130.18, 129.26, 128.29, 127.82, 126.95, 125.57, 124.23, 124.21, 122.80, 121.30, 120.82, 120.79, 119.93, 119.27, 77.73, 77.55, 63.22, 62.97, 15.62, 15.52; IR (thin film, cm<sup>-1</sup>) 3427, 3064, 2920, 2851, 1632, 1574, 1506, 1470, 1384, 1114, 758, 618, 581; HRMS (ESI): *m/z* Calcd. for C<sub>18</sub>H<sub>14</sub>ClNO<sub>2</sub>Na [M+Na]<sup>+</sup> 334.0605; Found 334.0617.

**8-Chloro-11-ethoxy-2-methoxy-5H-indeno[1,2-b]quinolin-10(11H)-one (4l)**

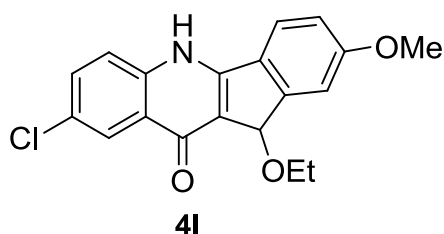

White solid in 61% yield (MeOH/DCM = 1:100): Mp 335.7–336.9 °C (decomposed); <sup>1</sup>H NMR (600 MHz, DMSO-*d*<sub>6</sub>) δ 12.58 – 12.46 (m, 1H), 8.09 (d, *J* = 7.1 Hz, 1H), 7.74 – 7.64 (m, 2H), 7.62 (d, *J* = 6.0 Hz, 1H), 7.53 (d, *J* = 7.6 Hz, 1H), 7.15 – 7.04 (m, 1H), 5.52 – 5.44 (m, 1H), 3.87 (s, 3H), 3.64 – 3.52 (m, 2H), 1.12 – 1.02 (m, 3H); <sup>13</sup>C NMR (150 MHz, DMSO-*d*<sub>6</sub>) δ 171.92, 171.51, 161.95, 160.16, 150.94, 150.50, 138.55, 137.57, 131.57, 131.31, 128.09, 127.91, 127.89, 127.76, 126.25, 126.20, 124.25, 124.20, 122.54, 122.50, 120.74, 120.70, 118.09, 116.57, 114.98, 114.75, 111.20, 111.12, 106.42, 106.33, 77.74, 77.38, 62.50, 62.35, 55.66, 55.56, 15.72, 15.66; IR (thin film, cm<sup>-1</sup>) 3425, 2920, 2851, 1618, 1573, 1506, 1469, 1241, 1148, 1121, 880, 768, 643, 619; HRMS (ESI): *m/z* Calcd. for C<sub>19</sub>H<sub>16</sub>ClNO<sub>3</sub>Na [M+Na]<sup>+</sup> 364.0711, Found 364.0715.

## 7. The Reaction Time Determination

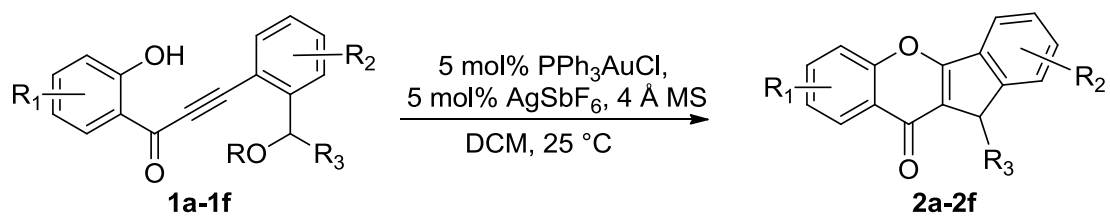

| substrate | structure | time of 50% conversion (min) | time of 100% conversion (min) |
|-----------|-----------|------------------------------|-------------------------------|
| <b>1a</b> |           | 20                           | 60                            |
| <b>1b</b> |           | 10                           | 40                            |
| <b>1c</b> |           | 15                           | 90                            |
| <b>1d</b> |           | 2                            | 5                             |
| <b>1e</b> |           | 15                           | 50                            |
| <b>1f</b> |           | 50                           | 120                           |

## 8. The Proposed Mechanism for *p*-Methoxybenzyl Ether-type Substrates

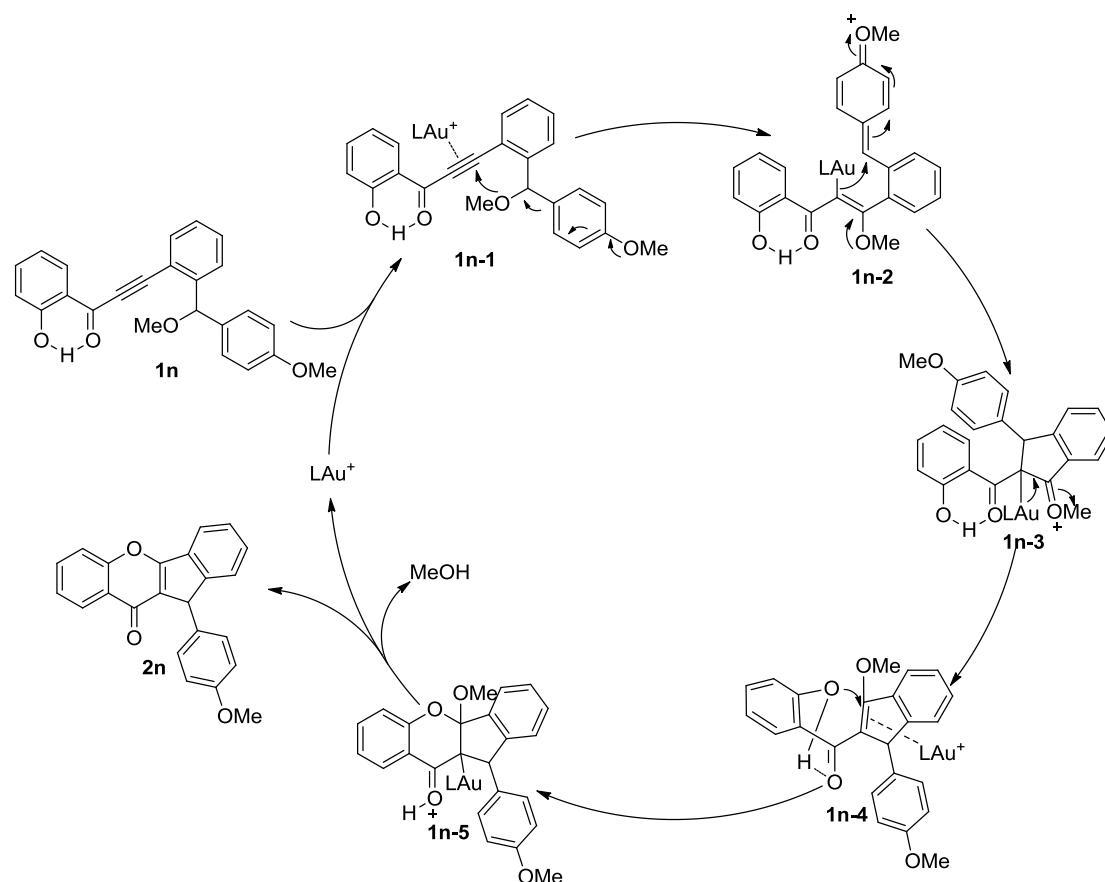

## 9. References

- [S1] Zi, W, F. D. Toste, *J. Am. Chem. Soc.* **2013**, *135*, 12600–12603.  
[S2] L. Sun, Y. Zhu, P. Lu, Y. Wang, *Org. Lett.* **2013**, *15*, 5894–5897.  
[S3] Y. Zhao, D. Li, L. Zhao, J. Zhao, *Synthesis* **2011**, *6*, 873–880.  
[S4] S. K. Pawar, C. -D. Wang, S. Bhunia, A. M. Jadhav, R. -S. Liu, *Angew. Chem.* **2013**, *125*, 7707–7711; *Angew. Chem. Int. Ed.* **2013**, *52*, 7559–7563.

## 10. NMR Spectra



11.74

8.26  
8.26  
8.25  
8.24

7.72  
7.71  
7.70  
7.54  
7.53  
7.52  
7.42  
7.41  
7.26  
7.01  
7.00  
6.98  
5.73

3.43

| Parameter                | Value                |
|--------------------------|----------------------|
| 1 Origin                 | Brucker Biospin GmbH |
| 2 Owner                  | nmr                  |
| 3 Spectrometer           | spect                |
| 4 Solvent                | CDCl3                |
| 5 Temperature            | 297.9                |
| 6 Number of Scans        | 16                   |
| 7 Spectrometer Frequency | 600.13               |
| 8 Nucleus                | <sup>1</sup> H       |

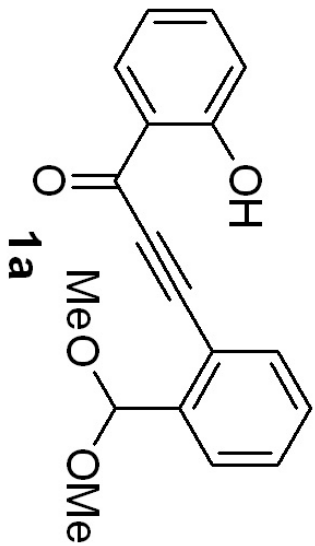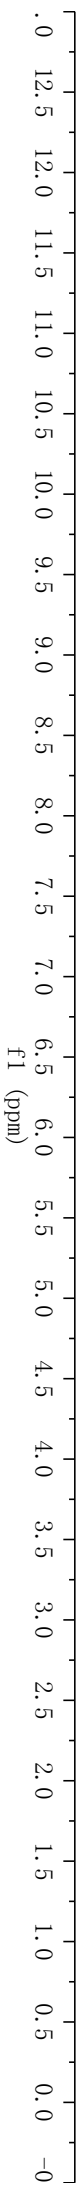

| Parameter                | Value               |
|--------------------------|---------------------|
| 1 Origin                 | Brüker Biospin GmbH |
| 2 Owner                  | nmr                 |
| 3 Spectrometer           | spect               |
| 4 Solvent                | CDCl <sub>3</sub>   |
| 5 Temperature            | 297.9               |
| 6 Number of Scans        | 209                 |
| 7 Spectrometer Frequency | 150.90              |
| 8 Nucleus                | <sup>13</sup> C     |

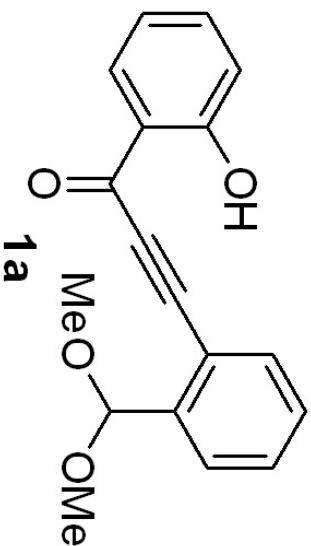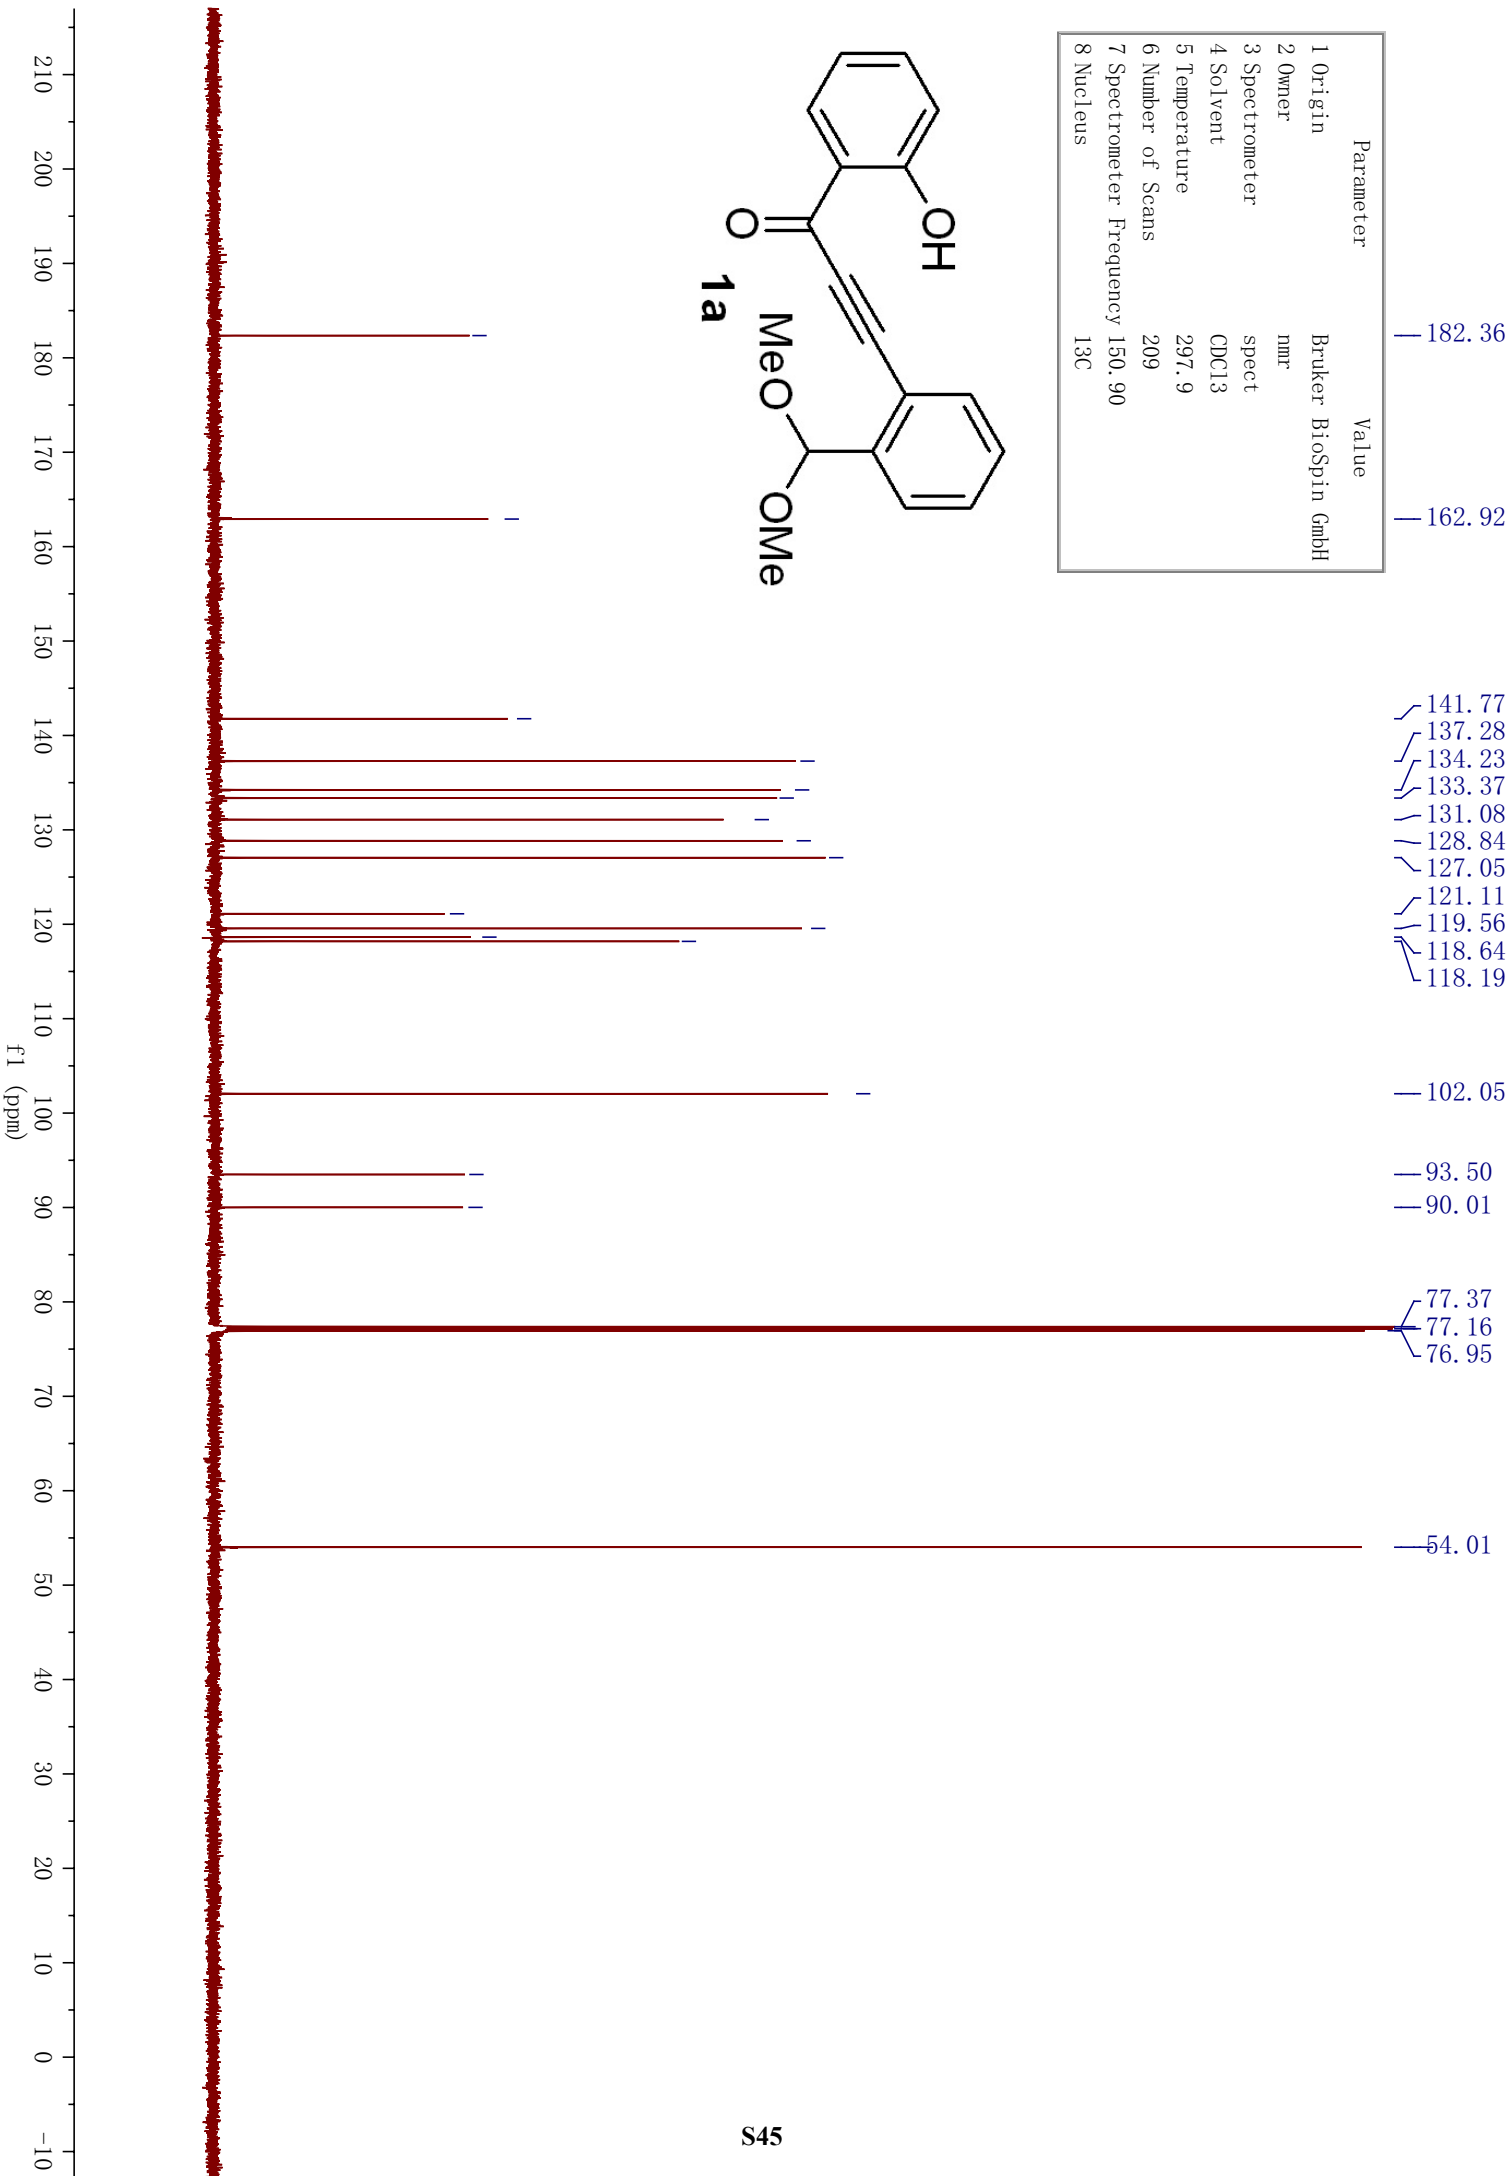

| Parameter                | Value               |
|--------------------------|---------------------|
| 1 Origin                 | Brüker Biospin GmbH |
| 2 Owner                  | nmr                 |
| 3 Spectrometer           | spect               |
| 4 Solvent                | CDCl3               |
| 5 Temperature            | 297.9               |
| 6 Number of Scans        | 16                  |
| 7 Spectrometer Frequency | 600.13              |
| 8 Nucleus                | 1H                  |

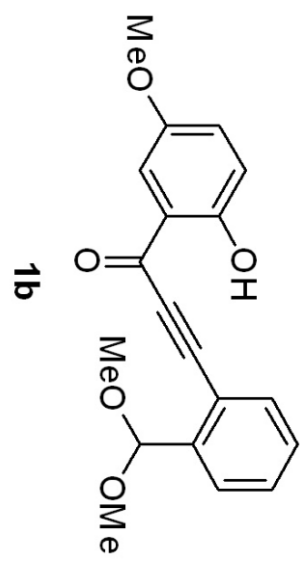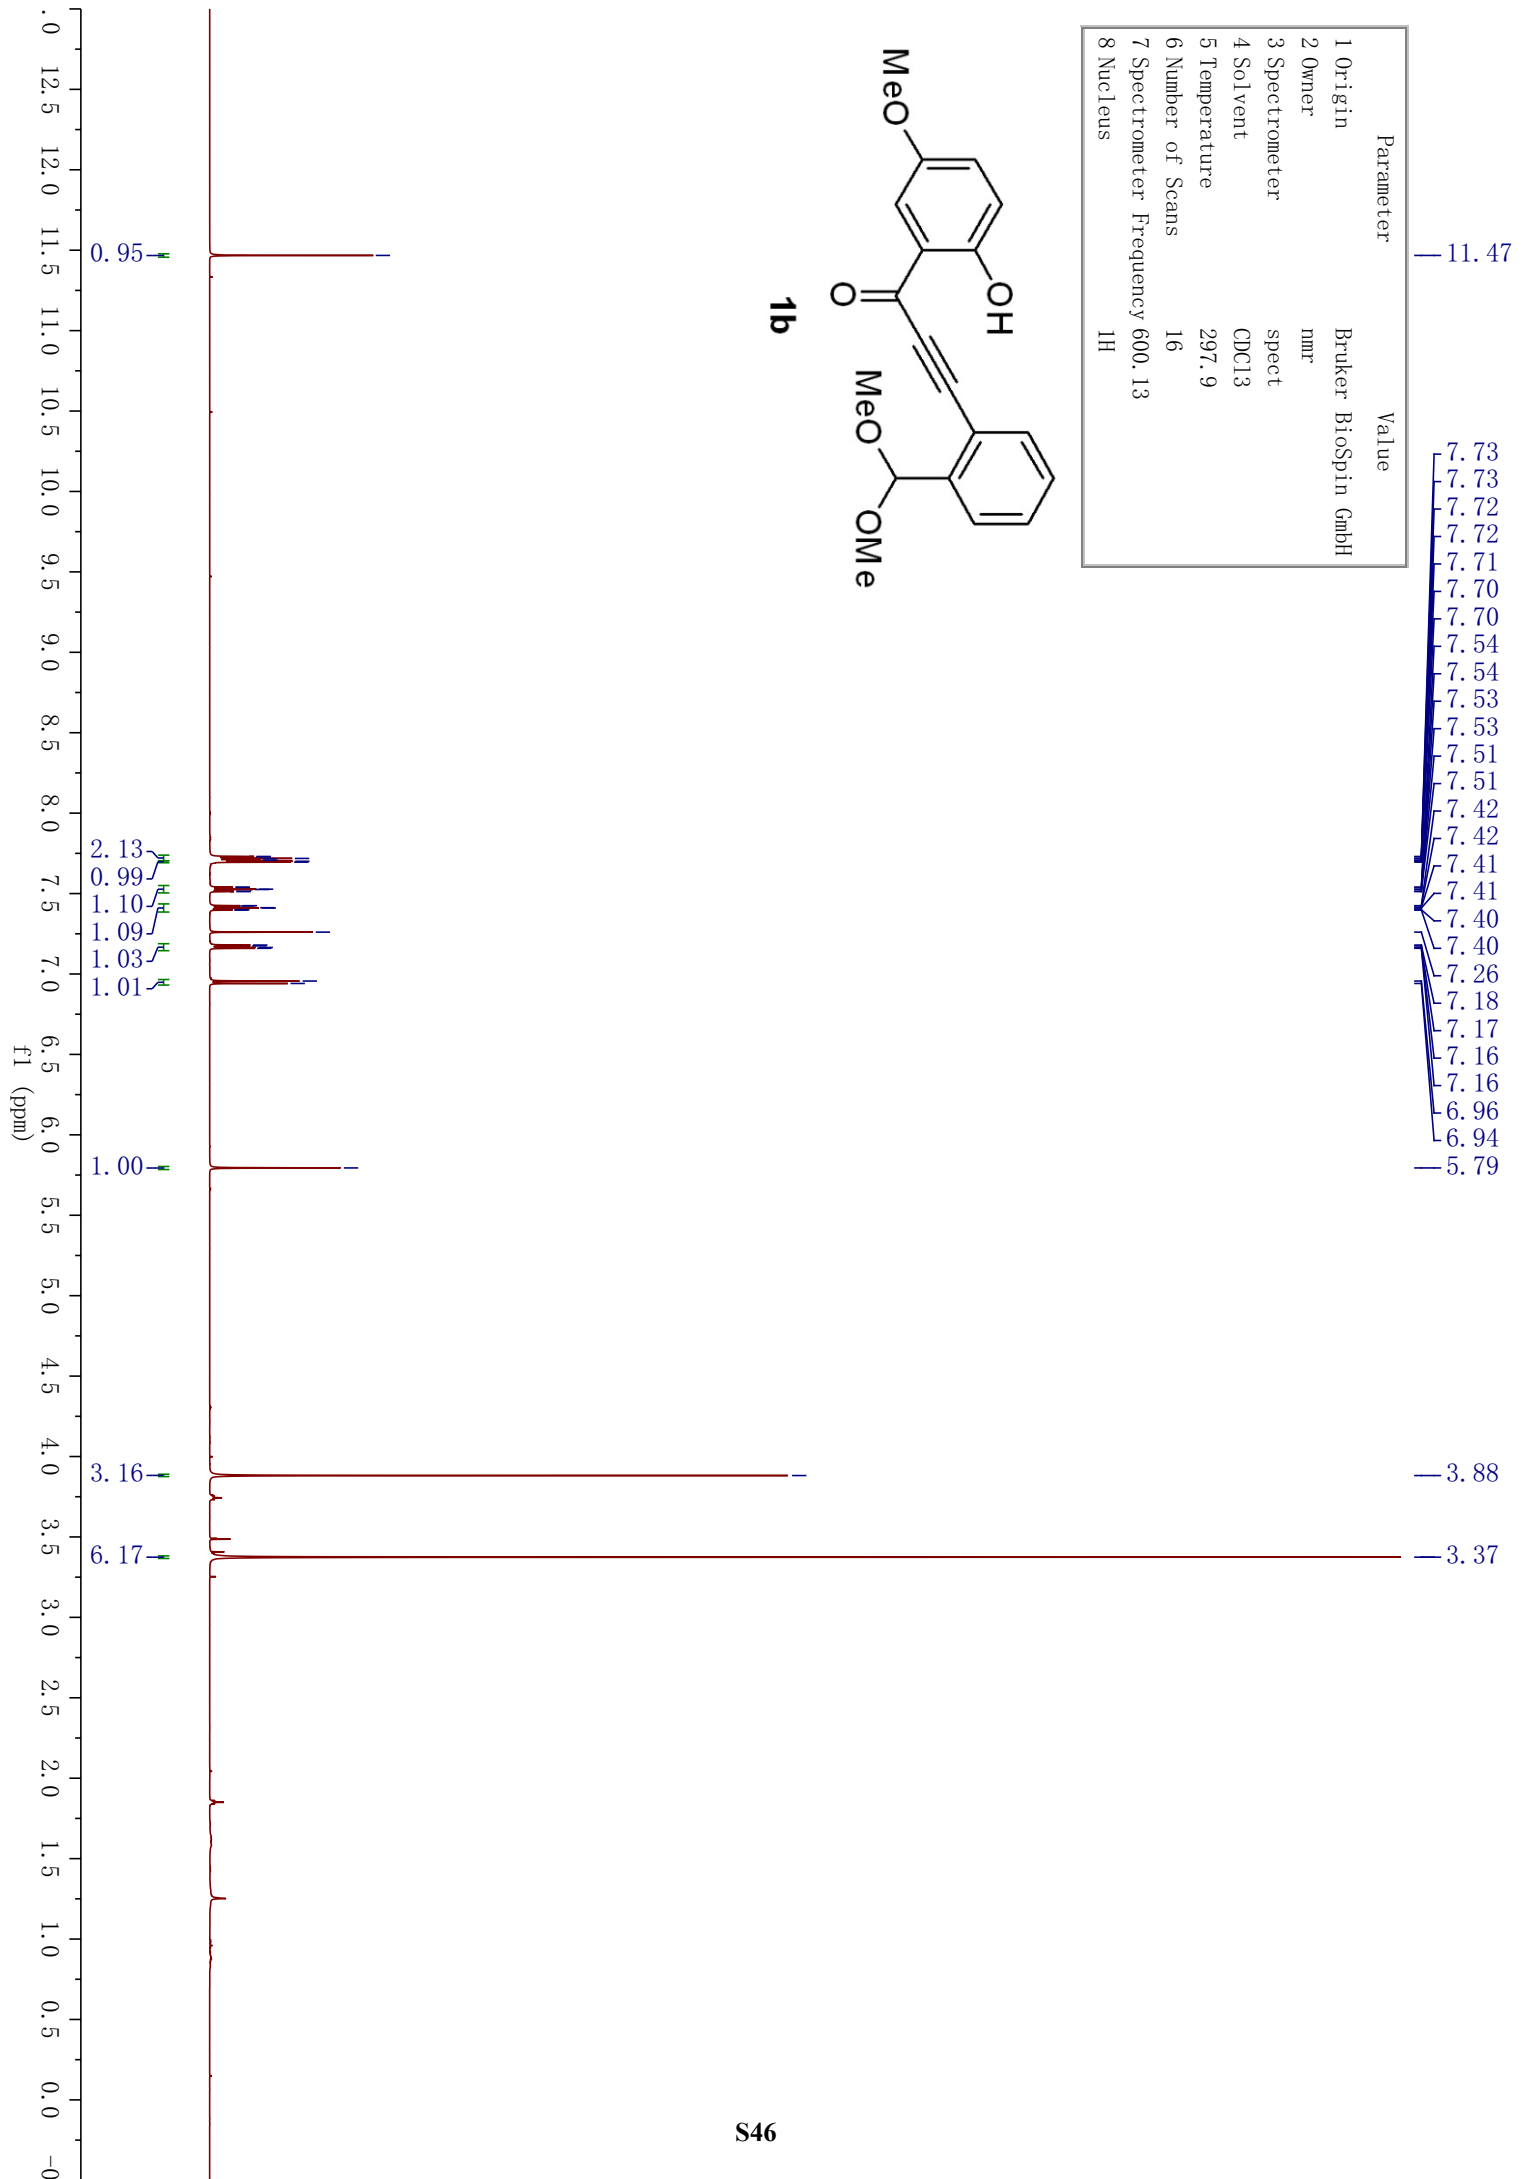

| Parameter                | Value                |
|--------------------------|----------------------|
| 1 Origin                 | Brucker BioSpin GmbH |
| 2 Owner                  | nmr                  |
| 3 Spectrometer           | spect                |
| 4 Solvent                | CDCl3                |
| 5 Temperature            | 297.9                |
| 6 Number of Scans        | 435                  |
| 7 Spectrometer Frequency | 150.90               |
| 8 Nucleus                | <sup>13</sup> C      |

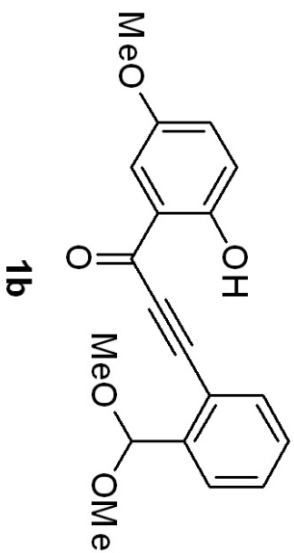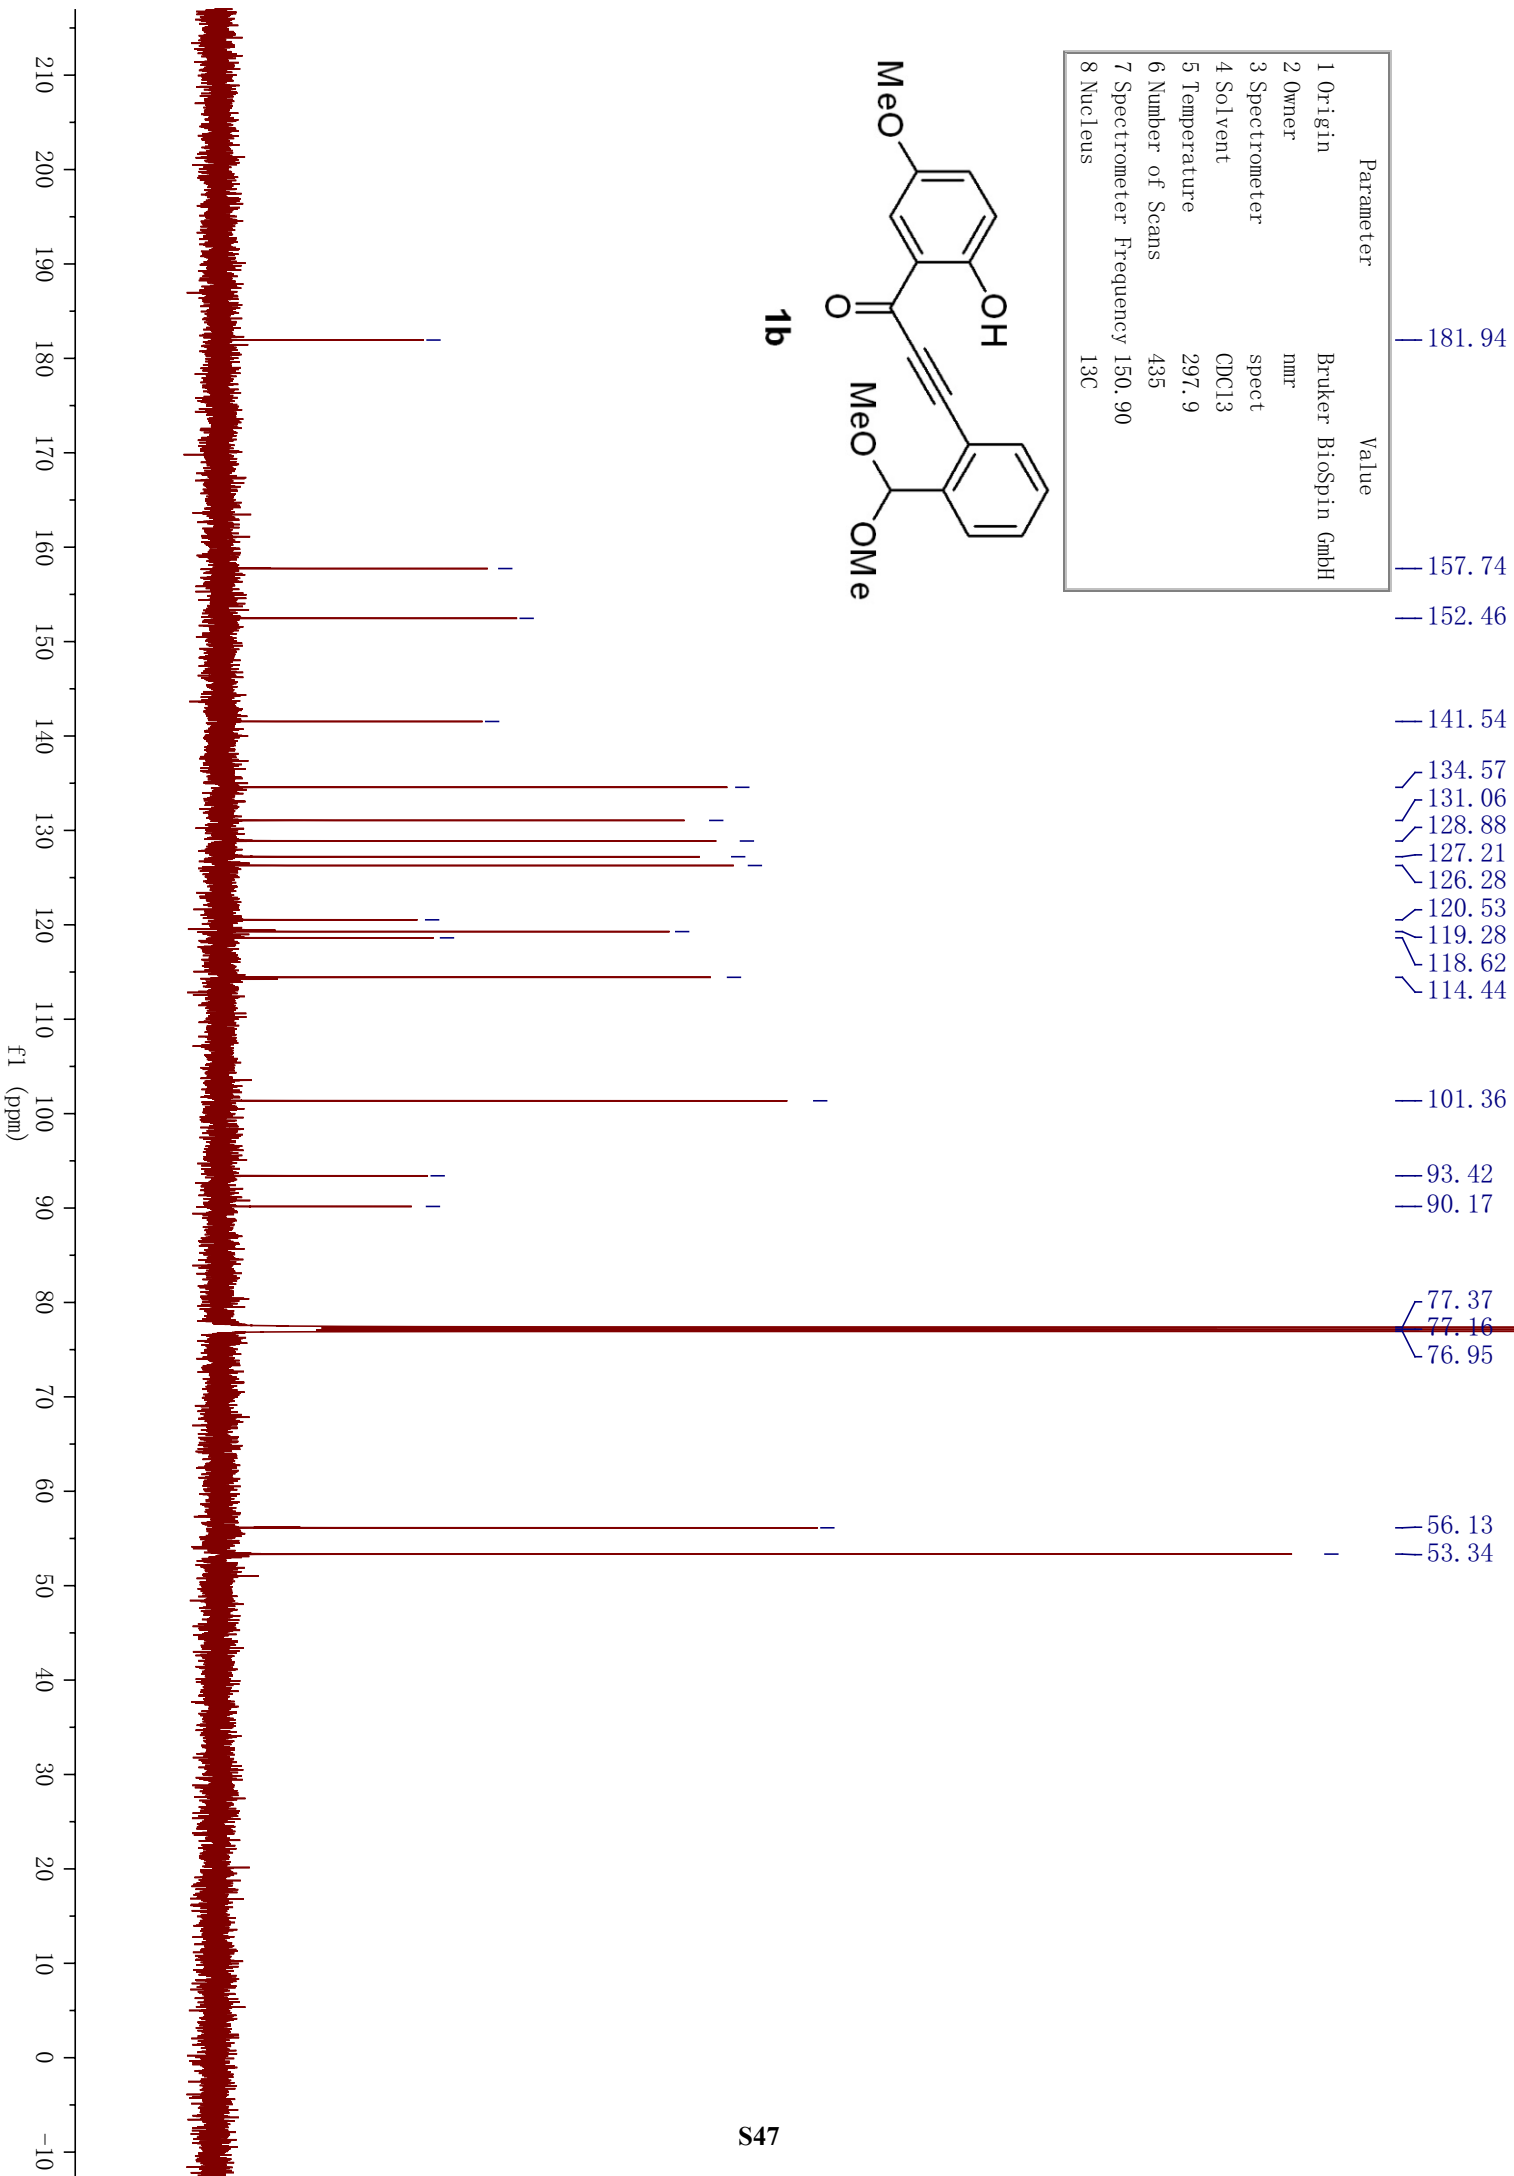

| Parameter                | Value               |
|--------------------------|---------------------|
| 1 Origin                 | Brüker Biospin GmbH |
| 2 Owner                  | nmr                 |
| 3 Spectrometer           | spect               |
| 4 Solvent                | CDCl3               |
| 5 Temperature            | 297.9               |
| 6 Number of Scans        | 16                  |
| 7 Spectrometer Frequency | 600.13              |
| 8 Nucleus                | <sup>1</sup> H      |

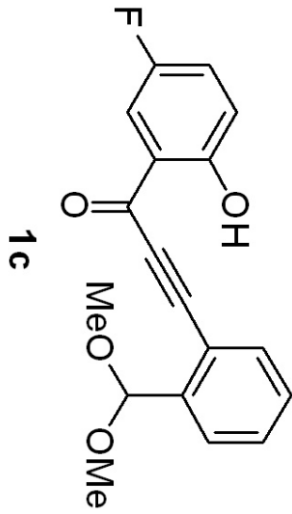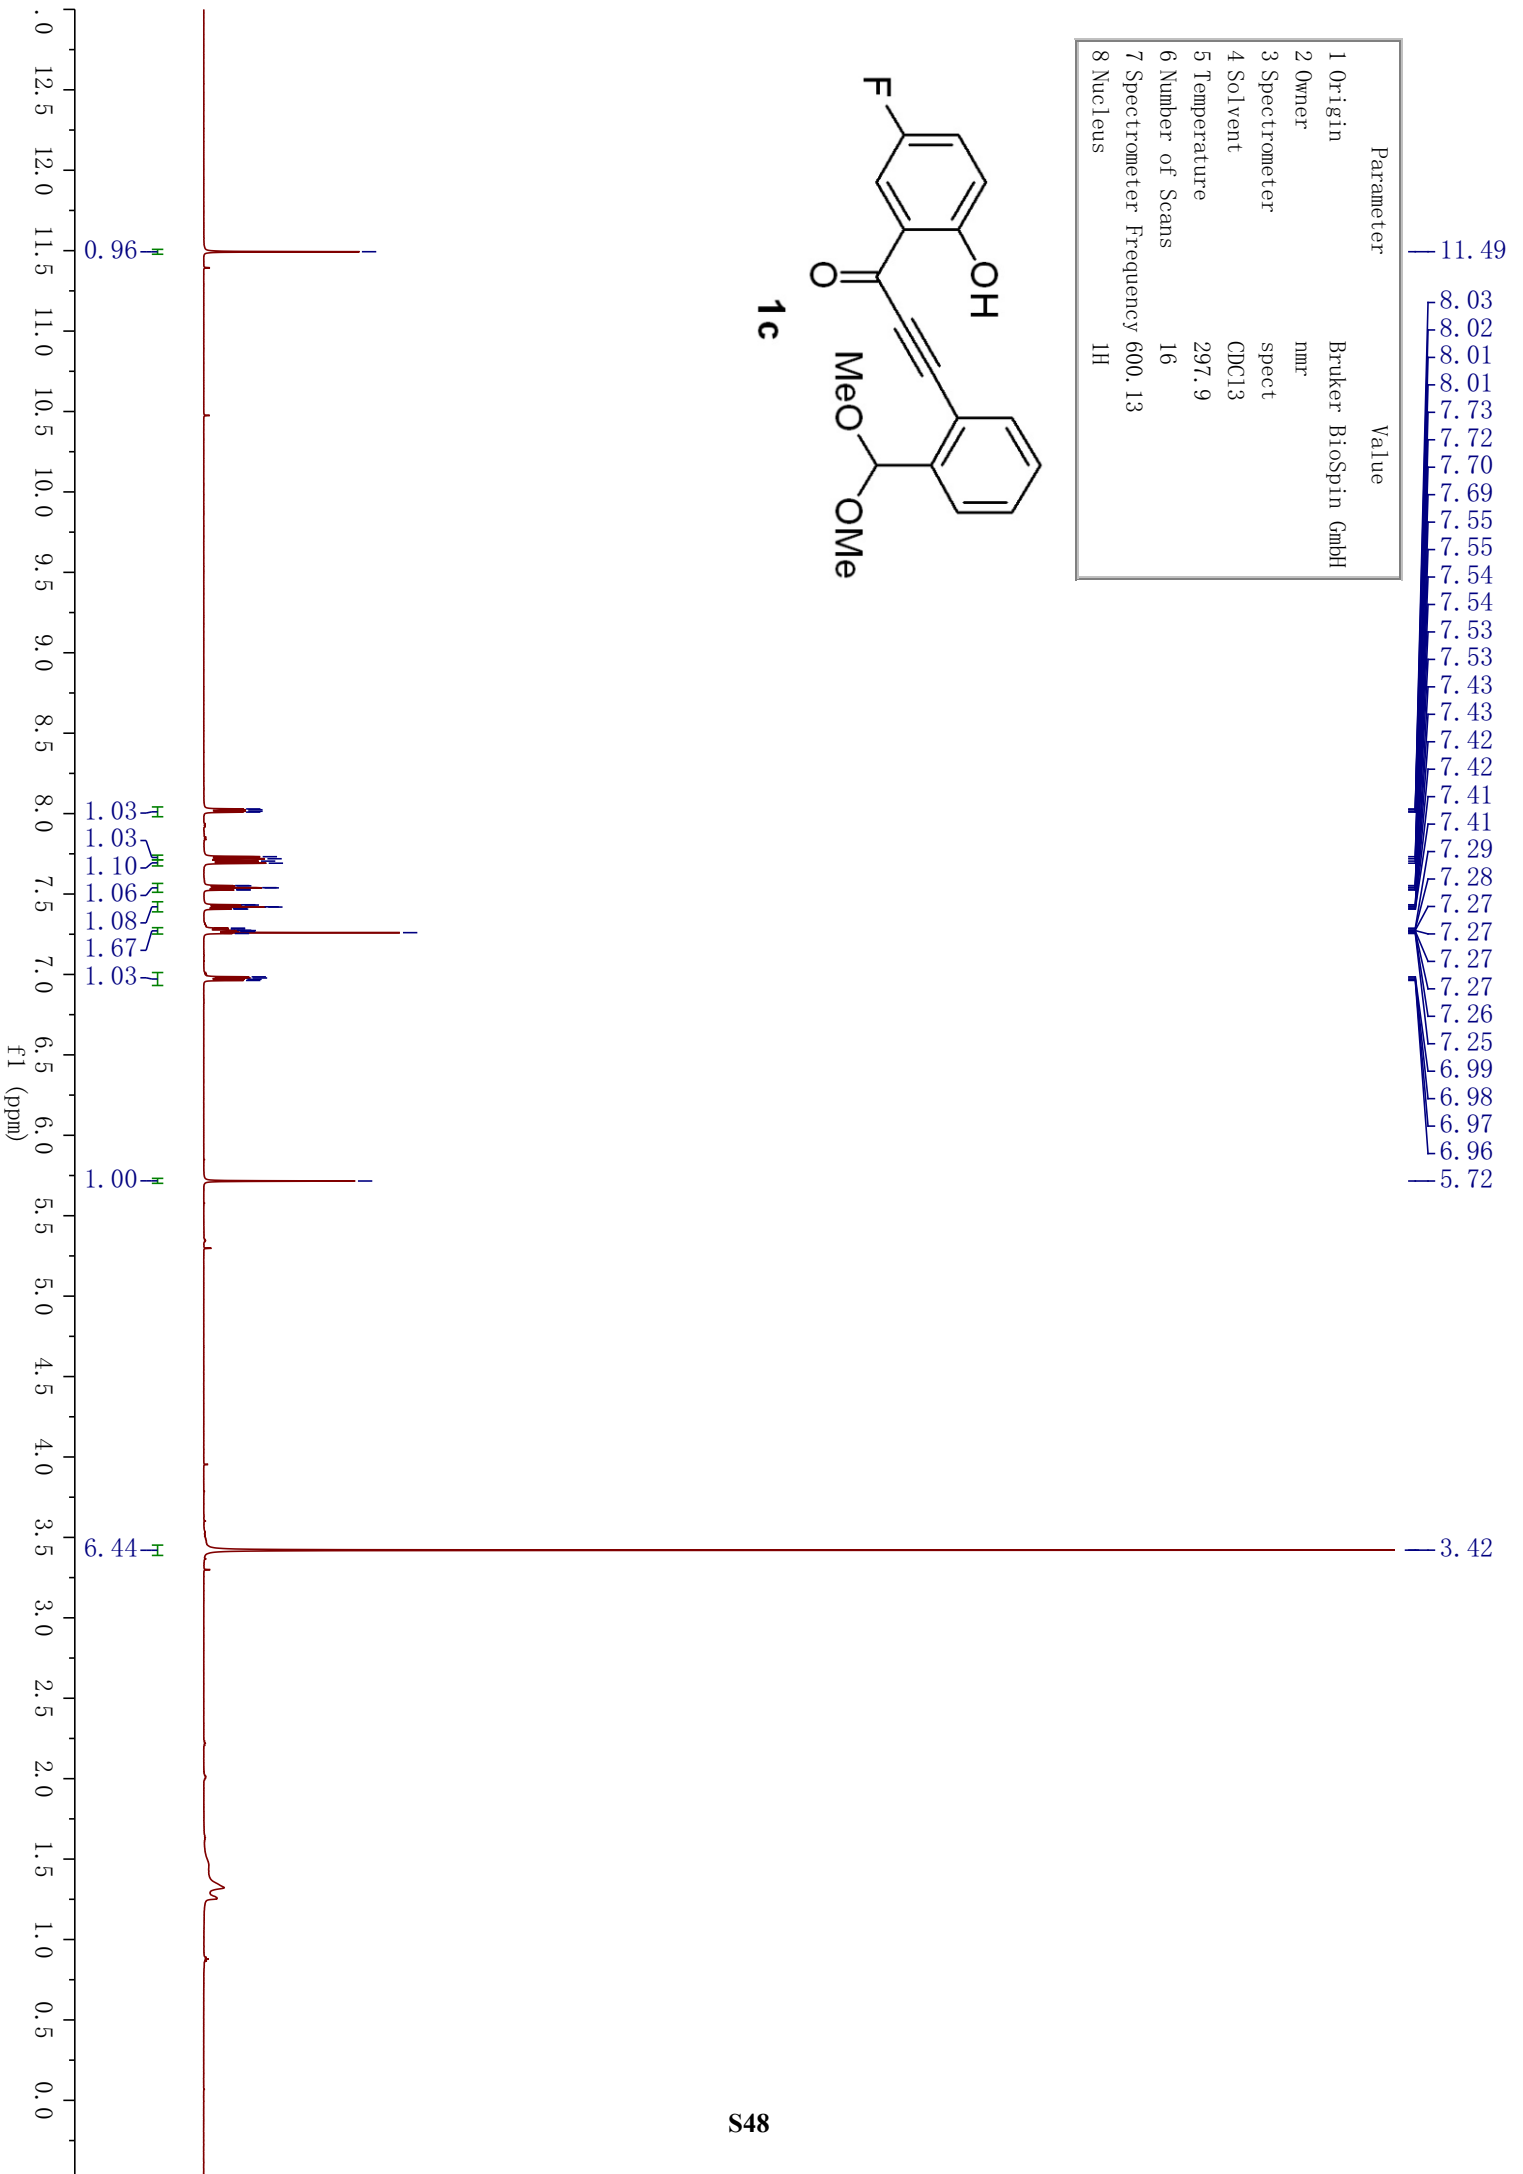

| Parameter                | Value               |
|--------------------------|---------------------|
| 1 Origin                 | Brüker Biospin GmbH |
| 2 Owner                  | nmr                 |
| 3 Spectrometer           | spect               |
| 4 Solvent                | CDCl3               |
| 5 Temperature            | 297.9               |
| 6 Number of Scans        | 248                 |
| 7 Spectrometer Frequency | 150.90              |
| 8 Nucleus                | <sup>13</sup> C     |

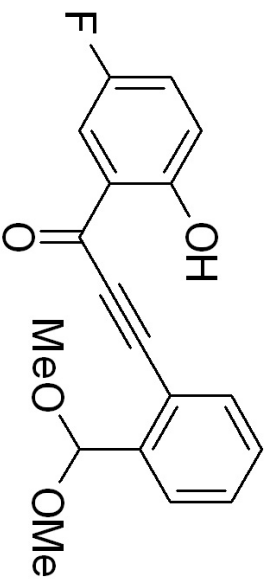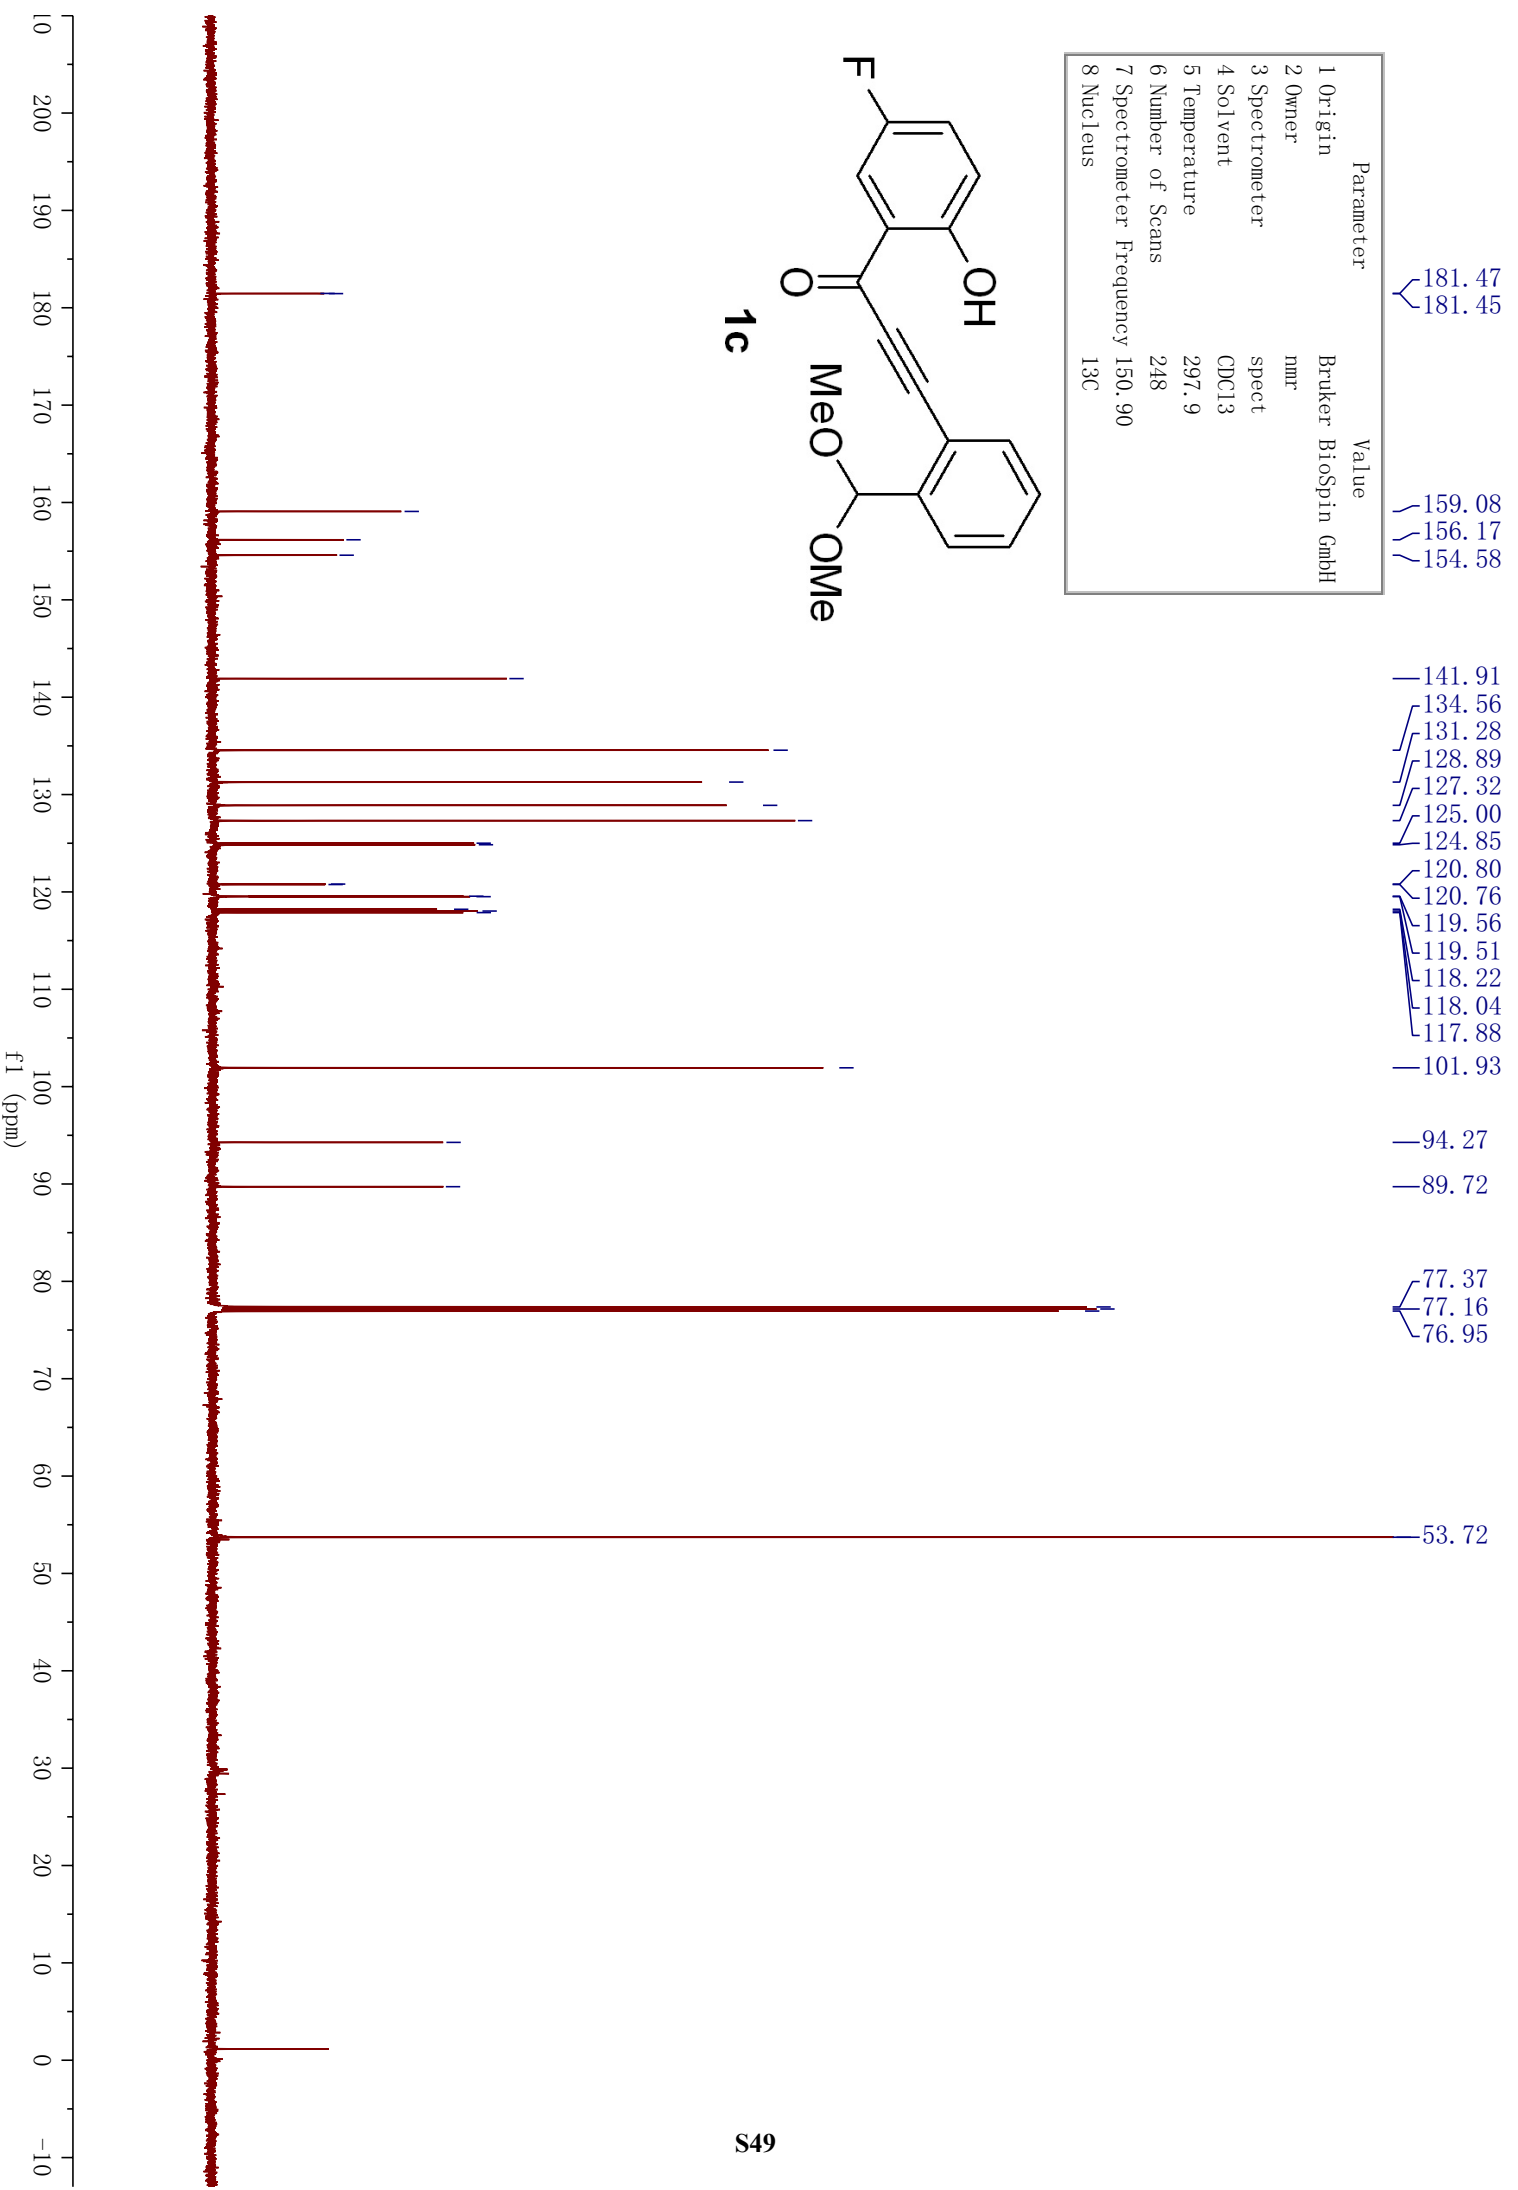

12.39

9.21  
9.20

8.40  
8.40  
8.39  
8.38

7.78  
7.77  
7.75  
7.74  
7.58  
7.57  
7.56  
7.45  
7.44  
7.26  
7.12  
7.11  
5.83

3.42

| Parameter                | Value                |
|--------------------------|----------------------|
| 1 Origin                 | Brucker Biospin GmbH |
| 2 Owner                  | nmr                  |
| 3 Spectrometer           | spect                |
| 4 Solvent                | CDCl3                |
| 5 Temperature            | 297.9                |
| 6 Number of Scans        | 16                   |
| 7 Spectrometer Frequency | 600.13               |
| 8 Nucleus                | <sup>1</sup> H       |

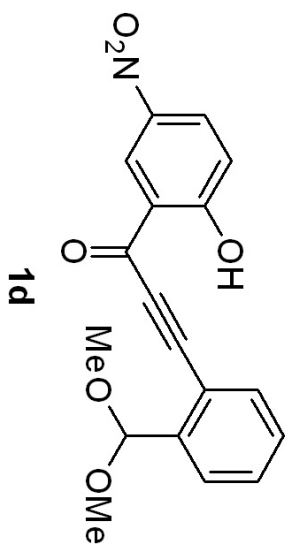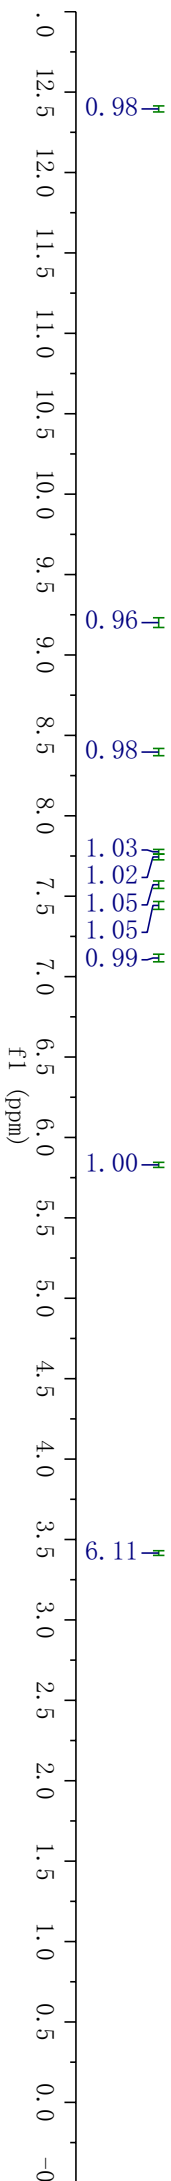

| Parameter                | Value               |
|--------------------------|---------------------|
| 1 Origin                 | Brüker Biospin GmbH |
| 2 Owner                  | nmr                 |
| 3 Spectrometer           | spect               |
| 4 Solvent                | CDCl3               |
| 5 Temperature            | 297.9               |
| 6 Number of Scans        | 165                 |
| 7 Spectrometer Frequency | 150.90              |
| 8 Nucleus                | <sup>13</sup> C     |

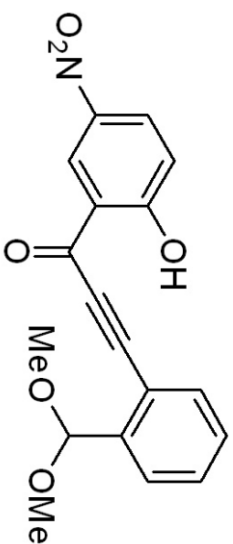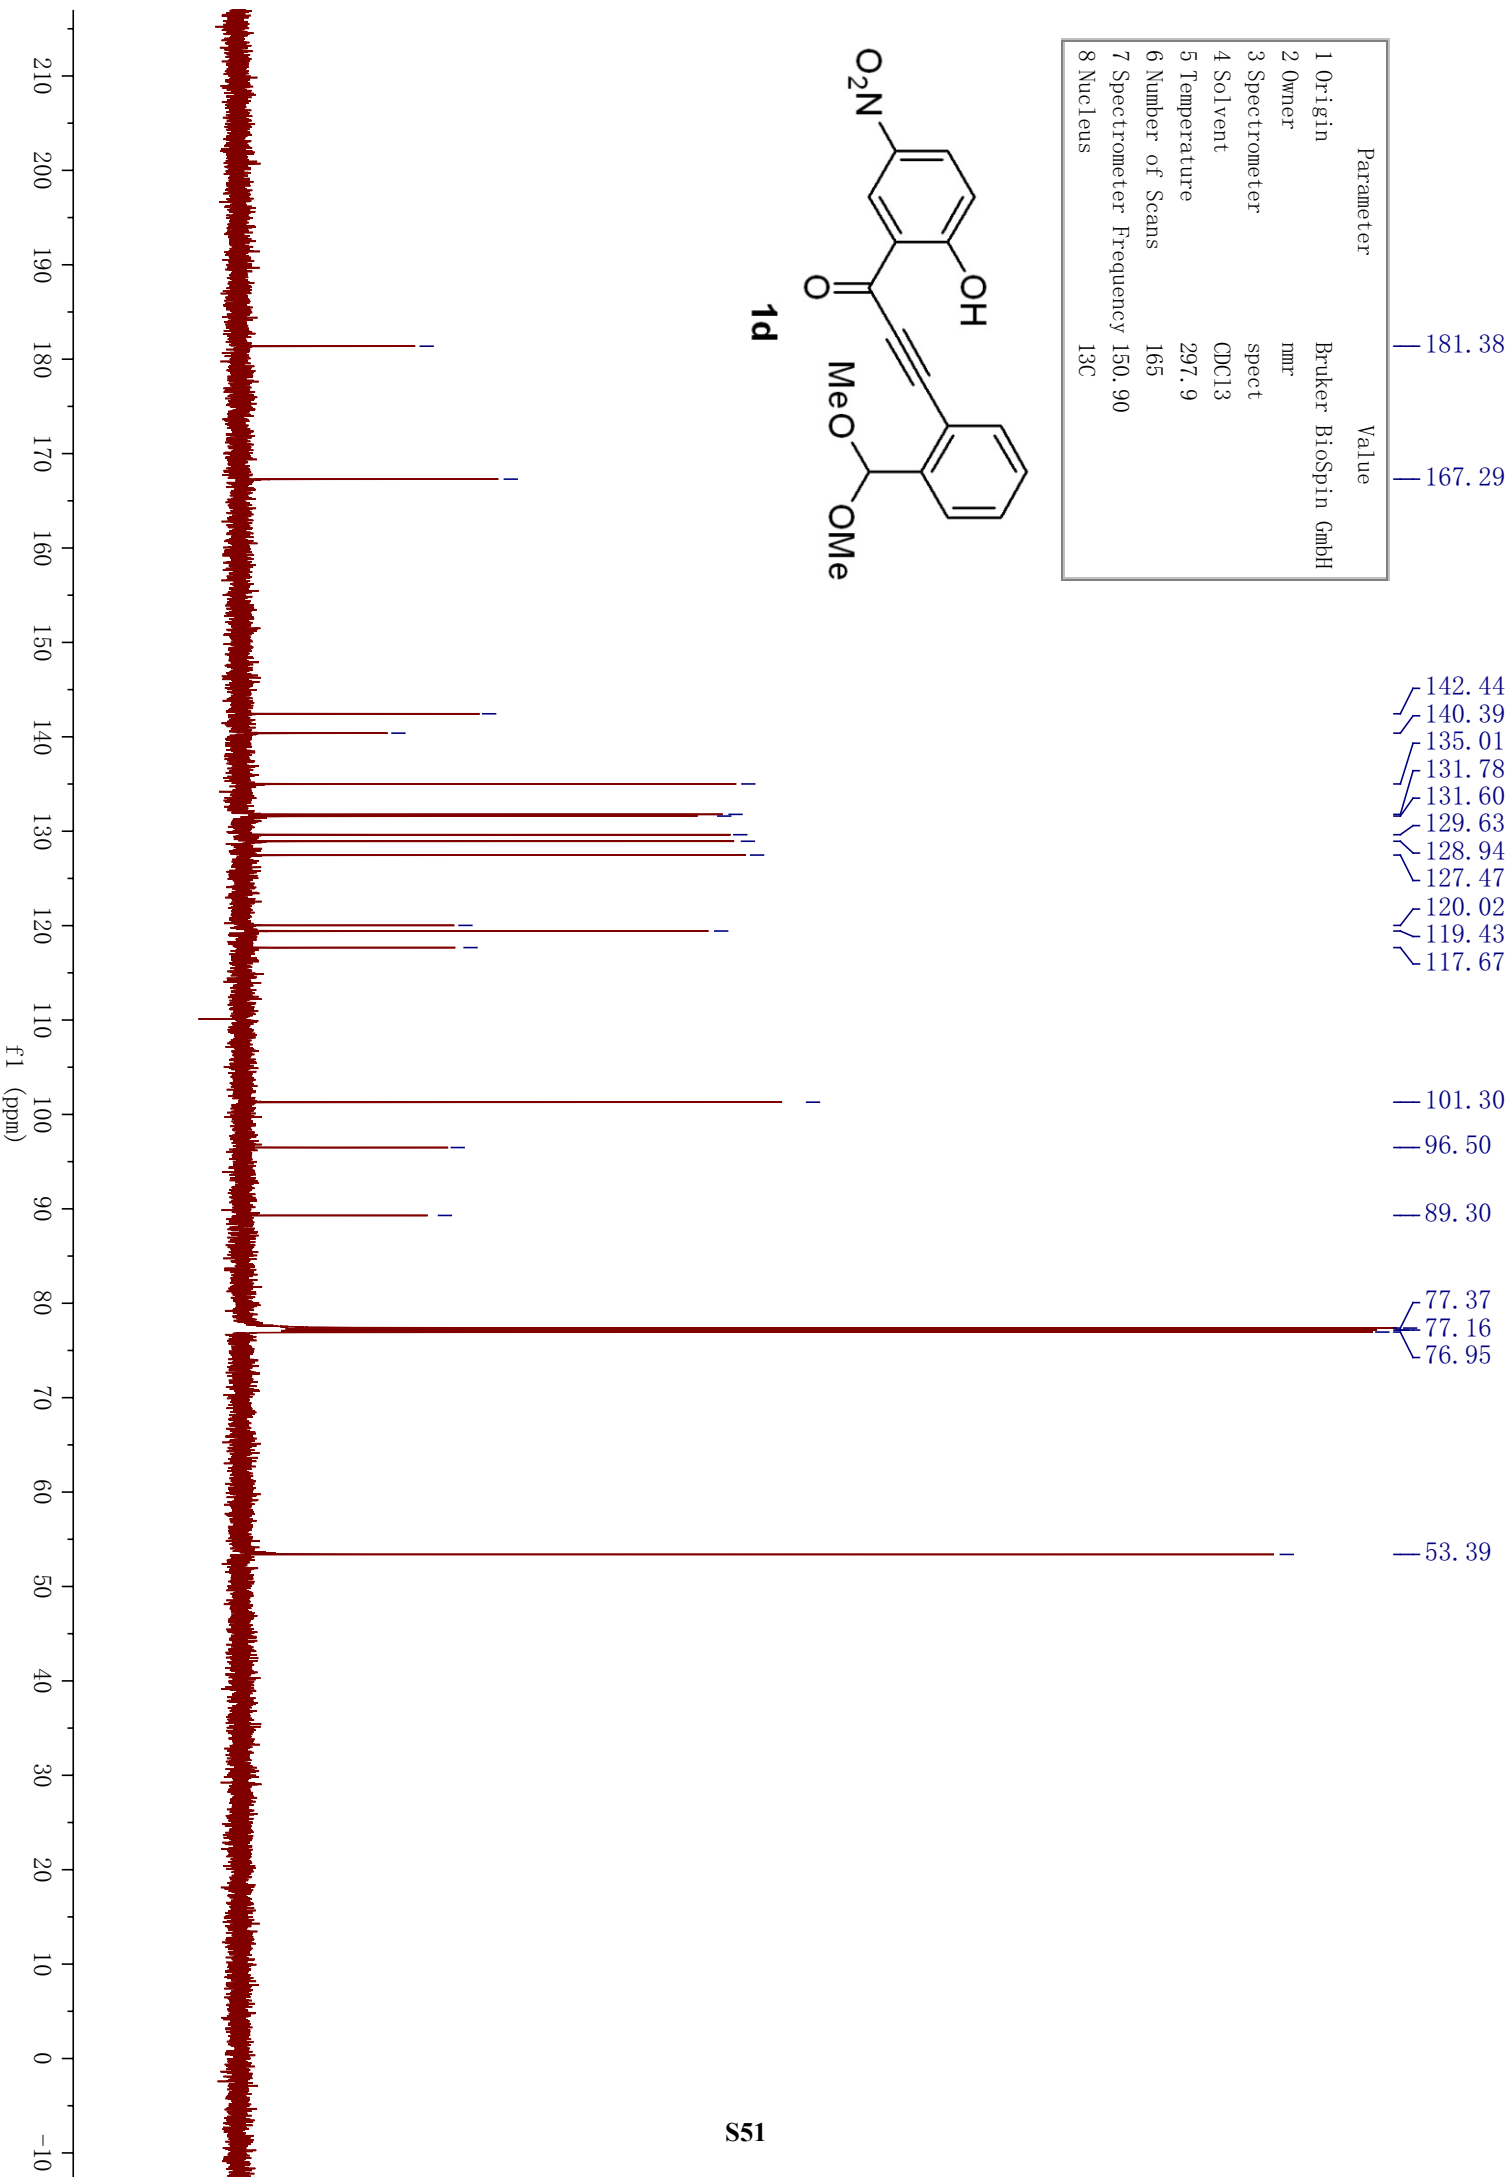



| Parameter                | Value               |
|--------------------------|---------------------|
| 1 Origin                 | Bruker Biospin GmbH |
| 2 Owner                  | nmr                 |
| 3 Spectrometer           | spect               |
| 4 Solvent                | CDCl3               |
| 5 Temperature            | 298.1               |
| 6 Number of Scans        | 16                  |
| 7 Spectrometer Frequency | 600.13              |
| 8 Nucleus                | <sup>1</sup> H      |

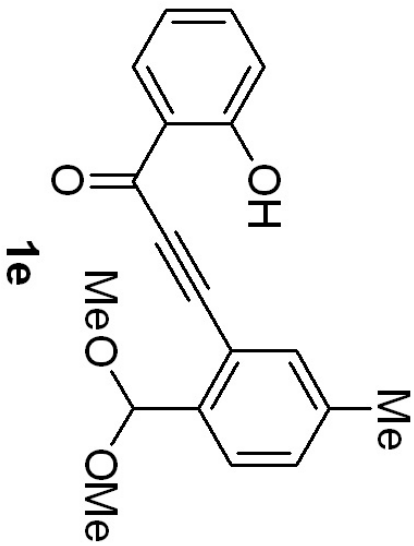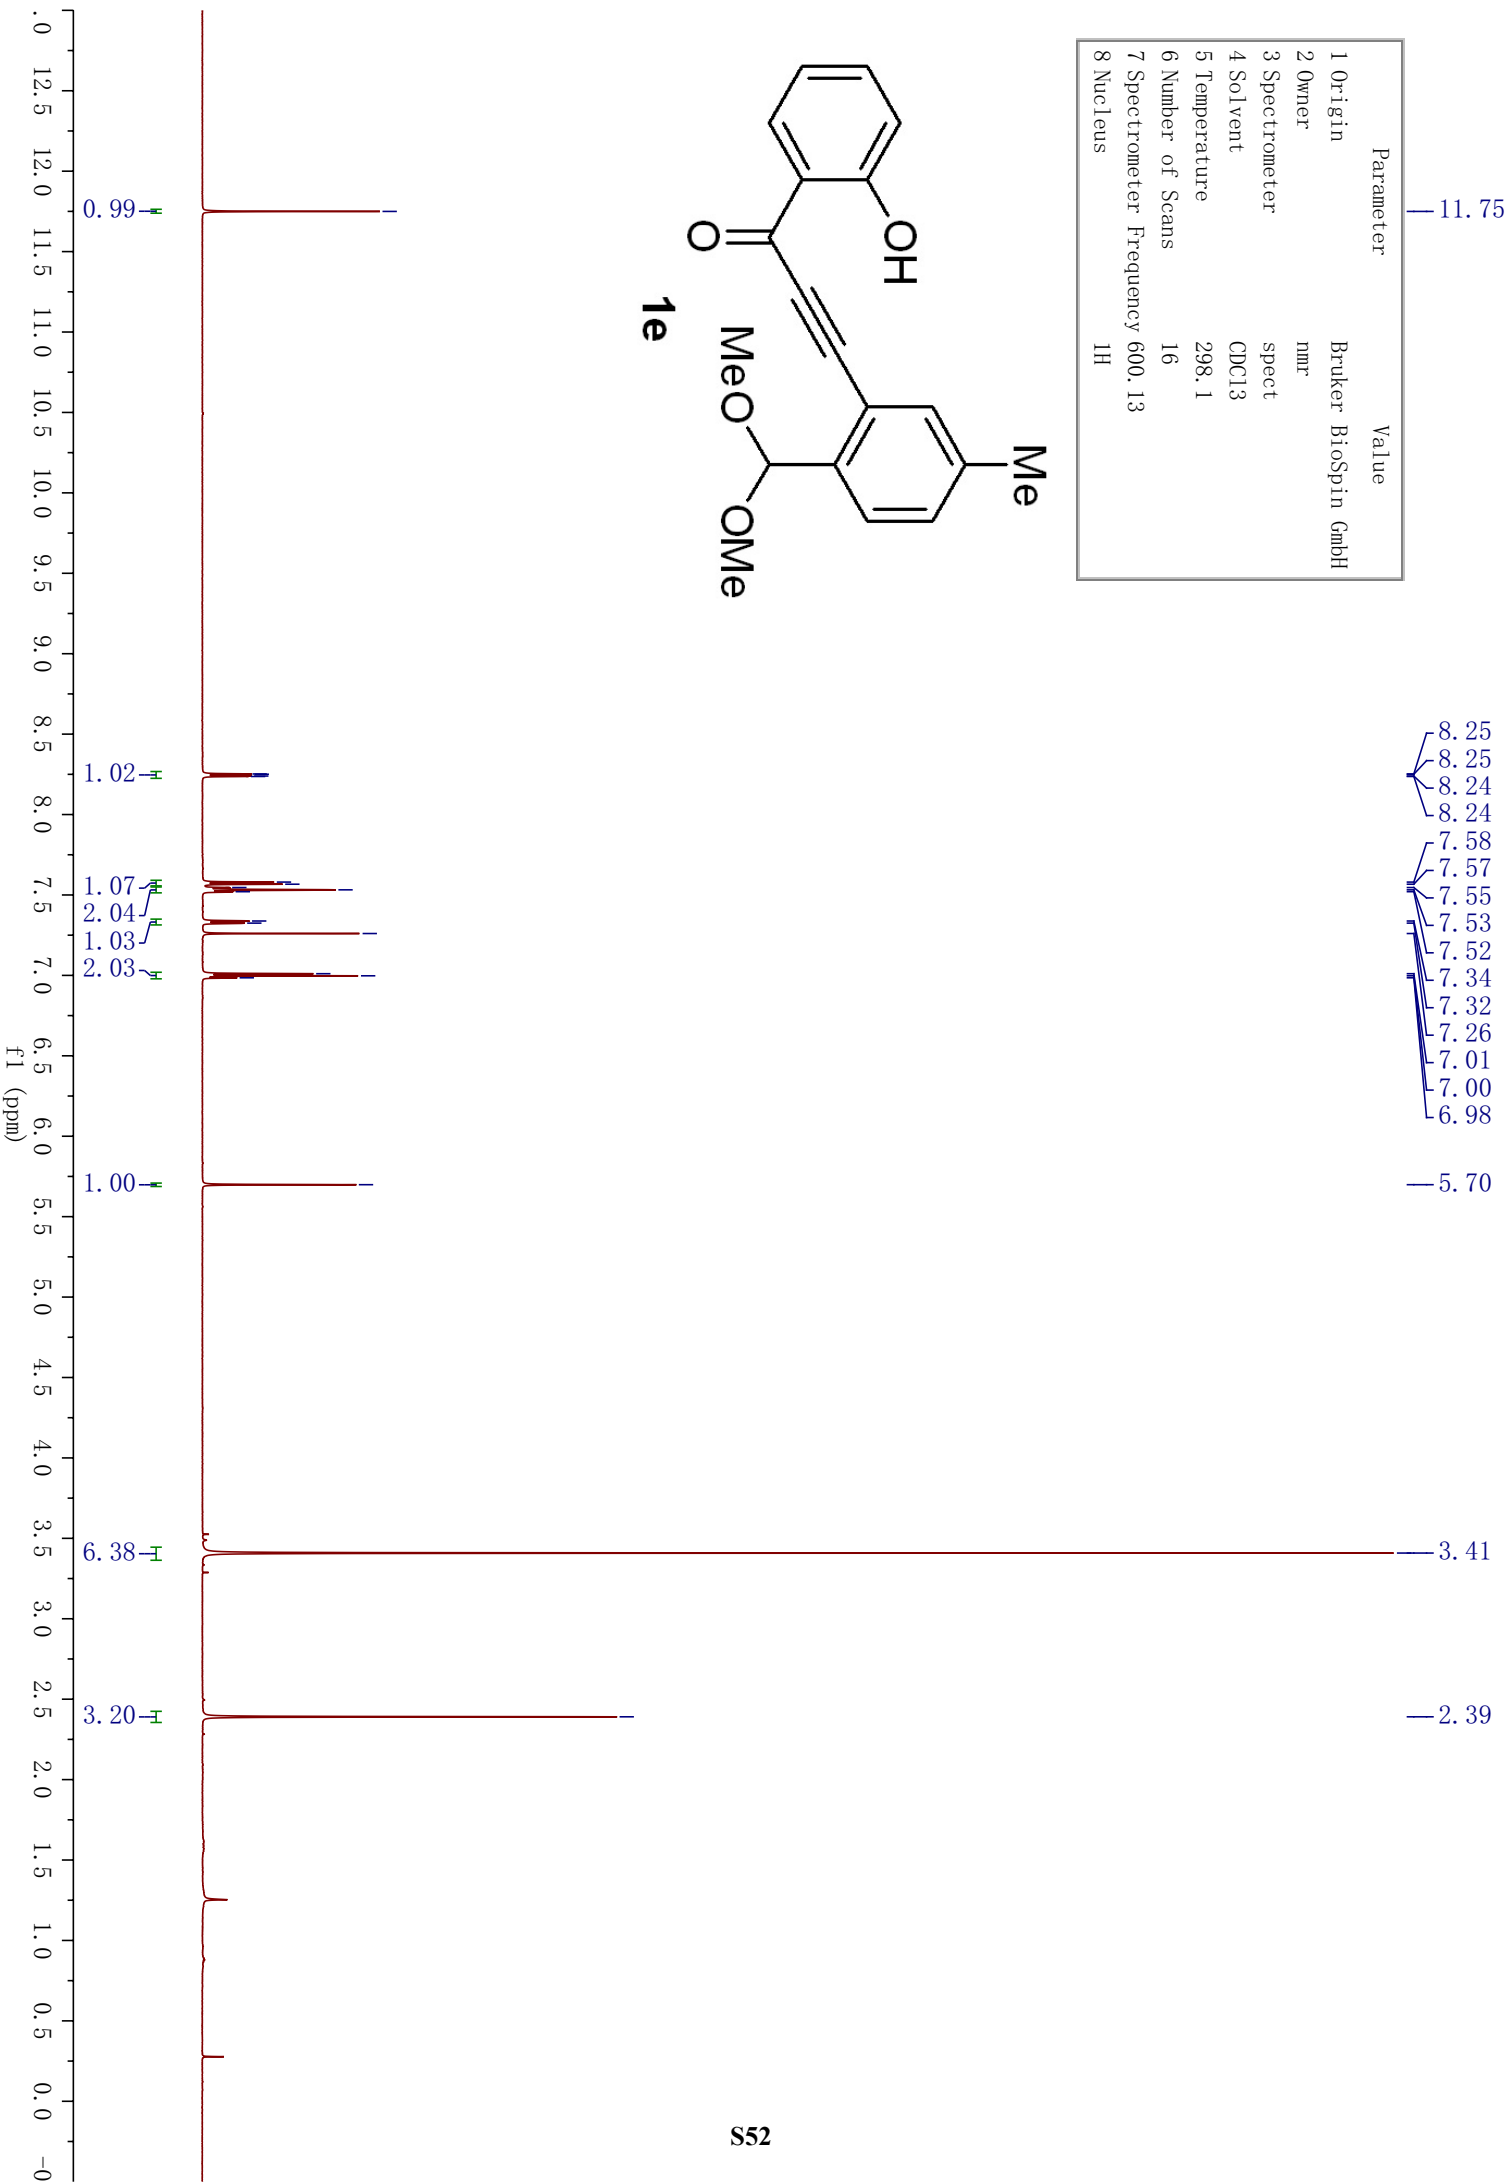

| Parameter                | Value                |
|--------------------------|----------------------|
| 1 Origin                 | Brucker BioSpin GmbH |
| 2 Owner                  | nmr                  |
| 3 Spectrometer           | spect                |
| 4 Solvent                | CDCl3                |
| 5 Temperature            | 297.9                |
| 6 Number of Scans        | 718                  |
| 7 Spectrometer Frequency | 150.90               |
| 8 Nucleus                | <sup>13</sup> C      |

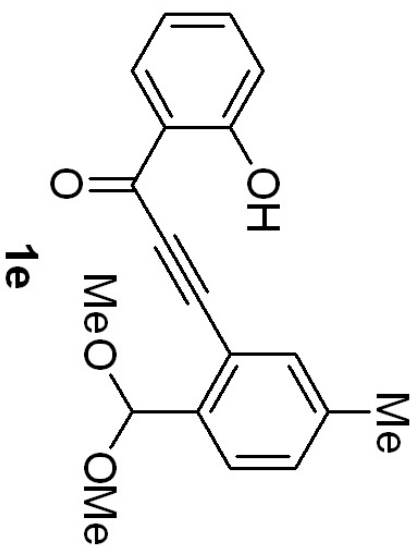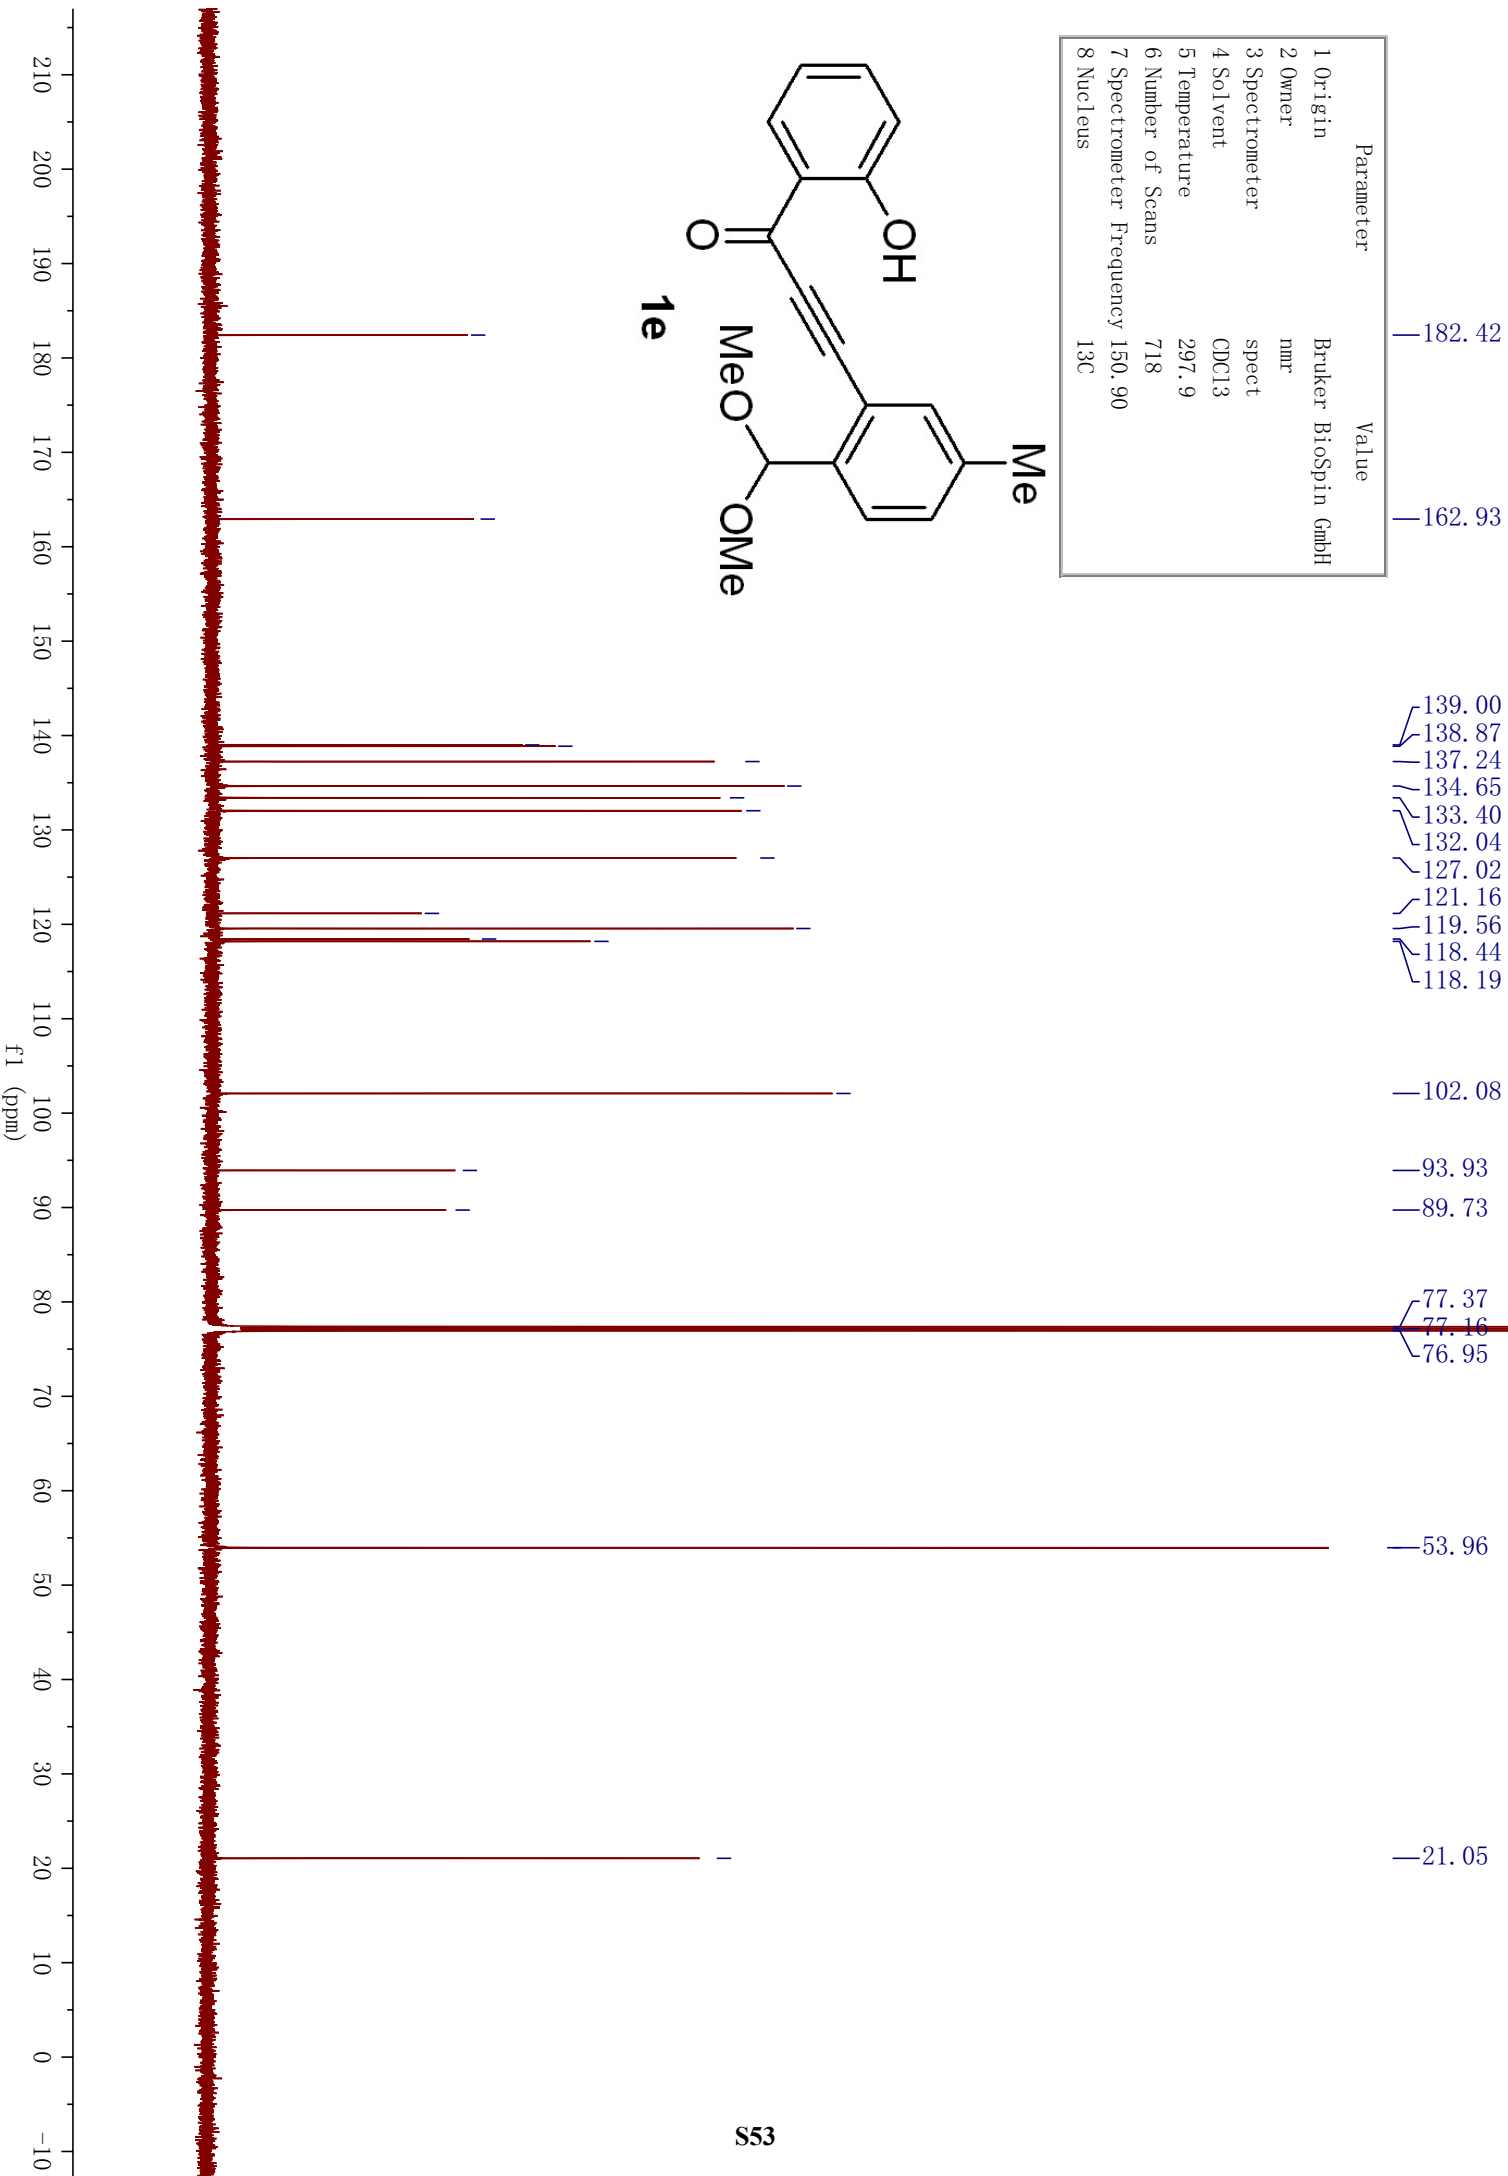

| Parameter                | Value               |
|--------------------------|---------------------|
| 1 Origin                 | Brüker BioSpin GmbH |
| 2 Owner                  | nmr                 |
| 3 Spectrometer           | spect               |
| 4 Solvent                | CDCl3               |
| 5 Temperature            | 297.9               |
| 6 Number of Scans        | 16                  |
| 7 Spectrometer Frequency | 600.13              |
| 8 Nucleus                | <sup>1</sup> H      |

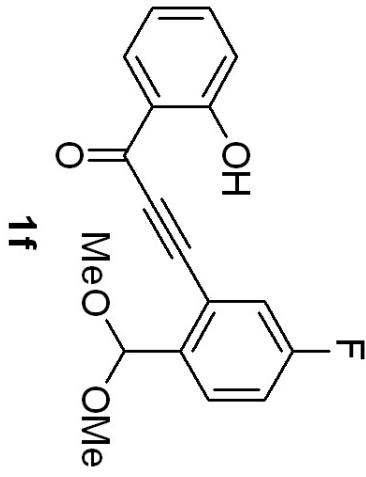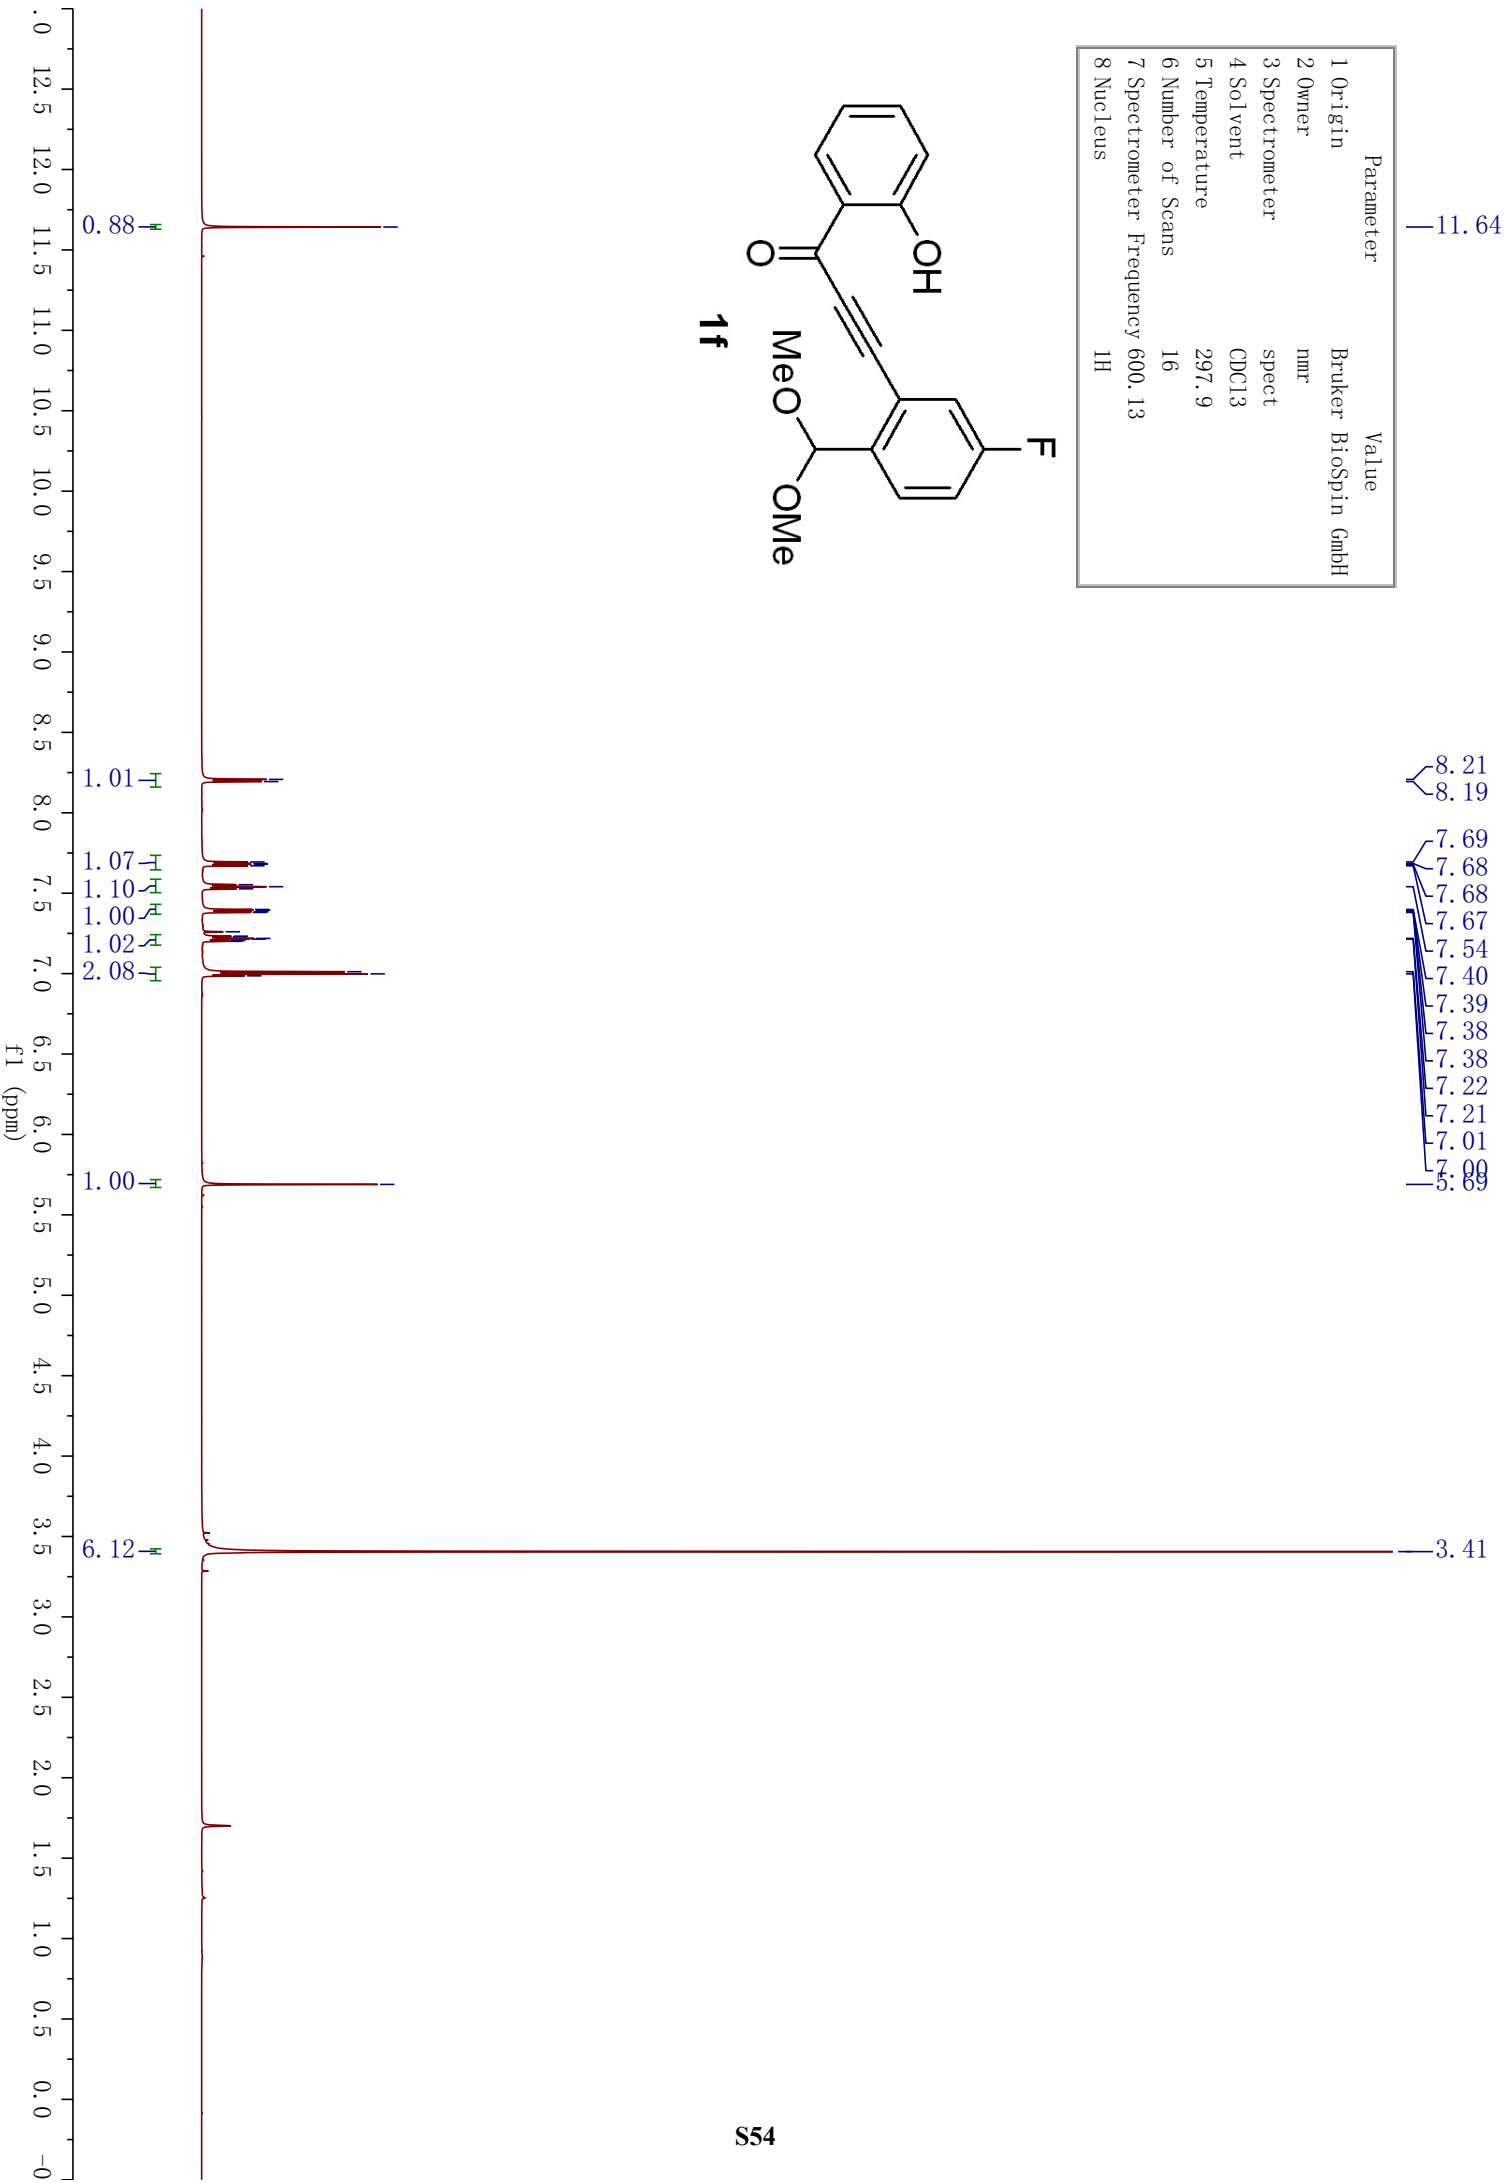

| Parameter                | Value               |
|--------------------------|---------------------|
| 1 Origin                 | Brüker Biospin GmbH |
| 2 Owner                  | nmr                 |
| 3 Spectrometer           | spect               |
| 4 Solvent                | CDCl <sub>3</sub>   |
| 5 Temperature            | 297.9               |
| 6 Number of Scans        | 190                 |
| 7 Spectrometer Frequency | 150.90              |
| 8 Nucleus                | <sup>13</sup> C     |

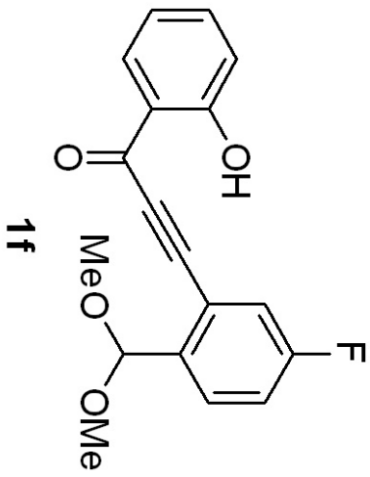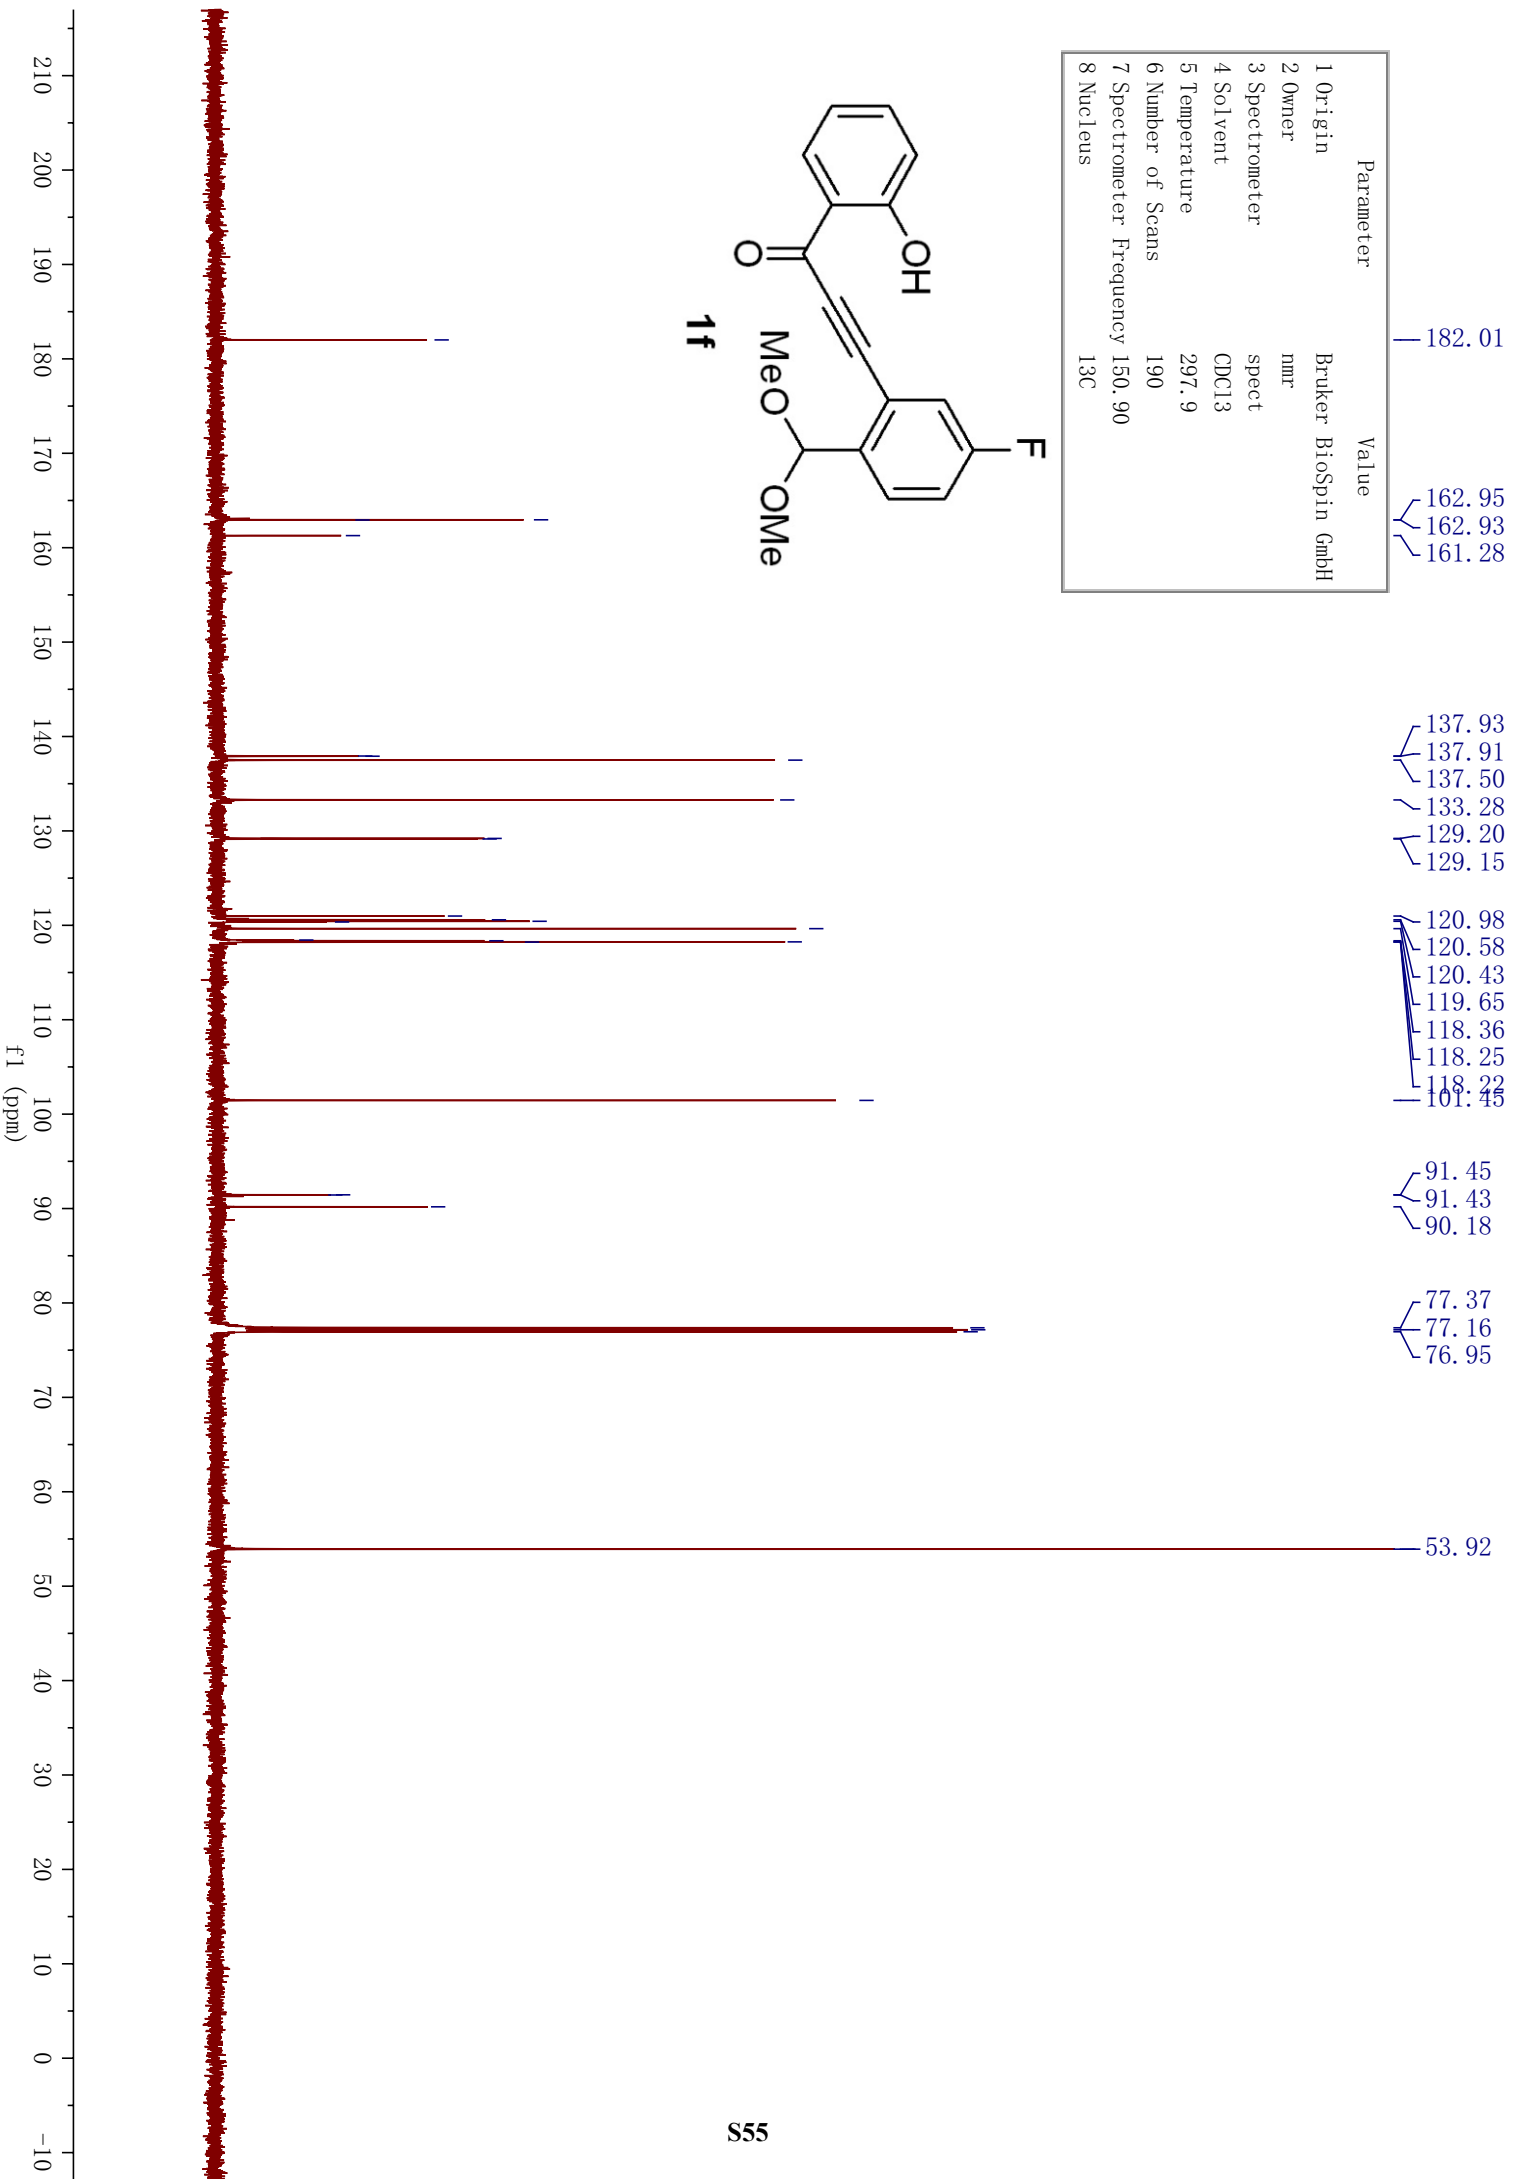

| Parameter                | Value               |
|--------------------------|---------------------|
| 1 Origin                 | Bruker Biospin GmbH |
| 2 Owner                  | nmr                 |
| 3 Spectrometer           | spect               |
| 4 Solvent                | CDCl3               |
| 5 Temperature            | 297.9               |
| 6 Number of Scans        | 16                  |
| 7 Spectrometer Frequency | 600.13              |
| 8 Nucleus                | <sup>1</sup> H      |

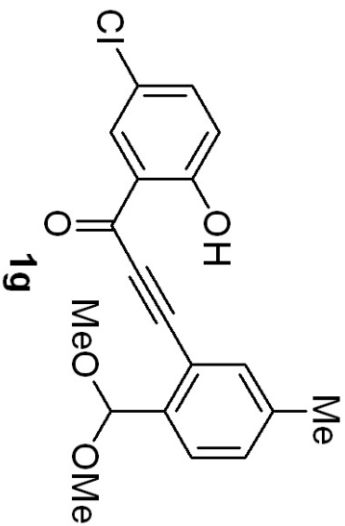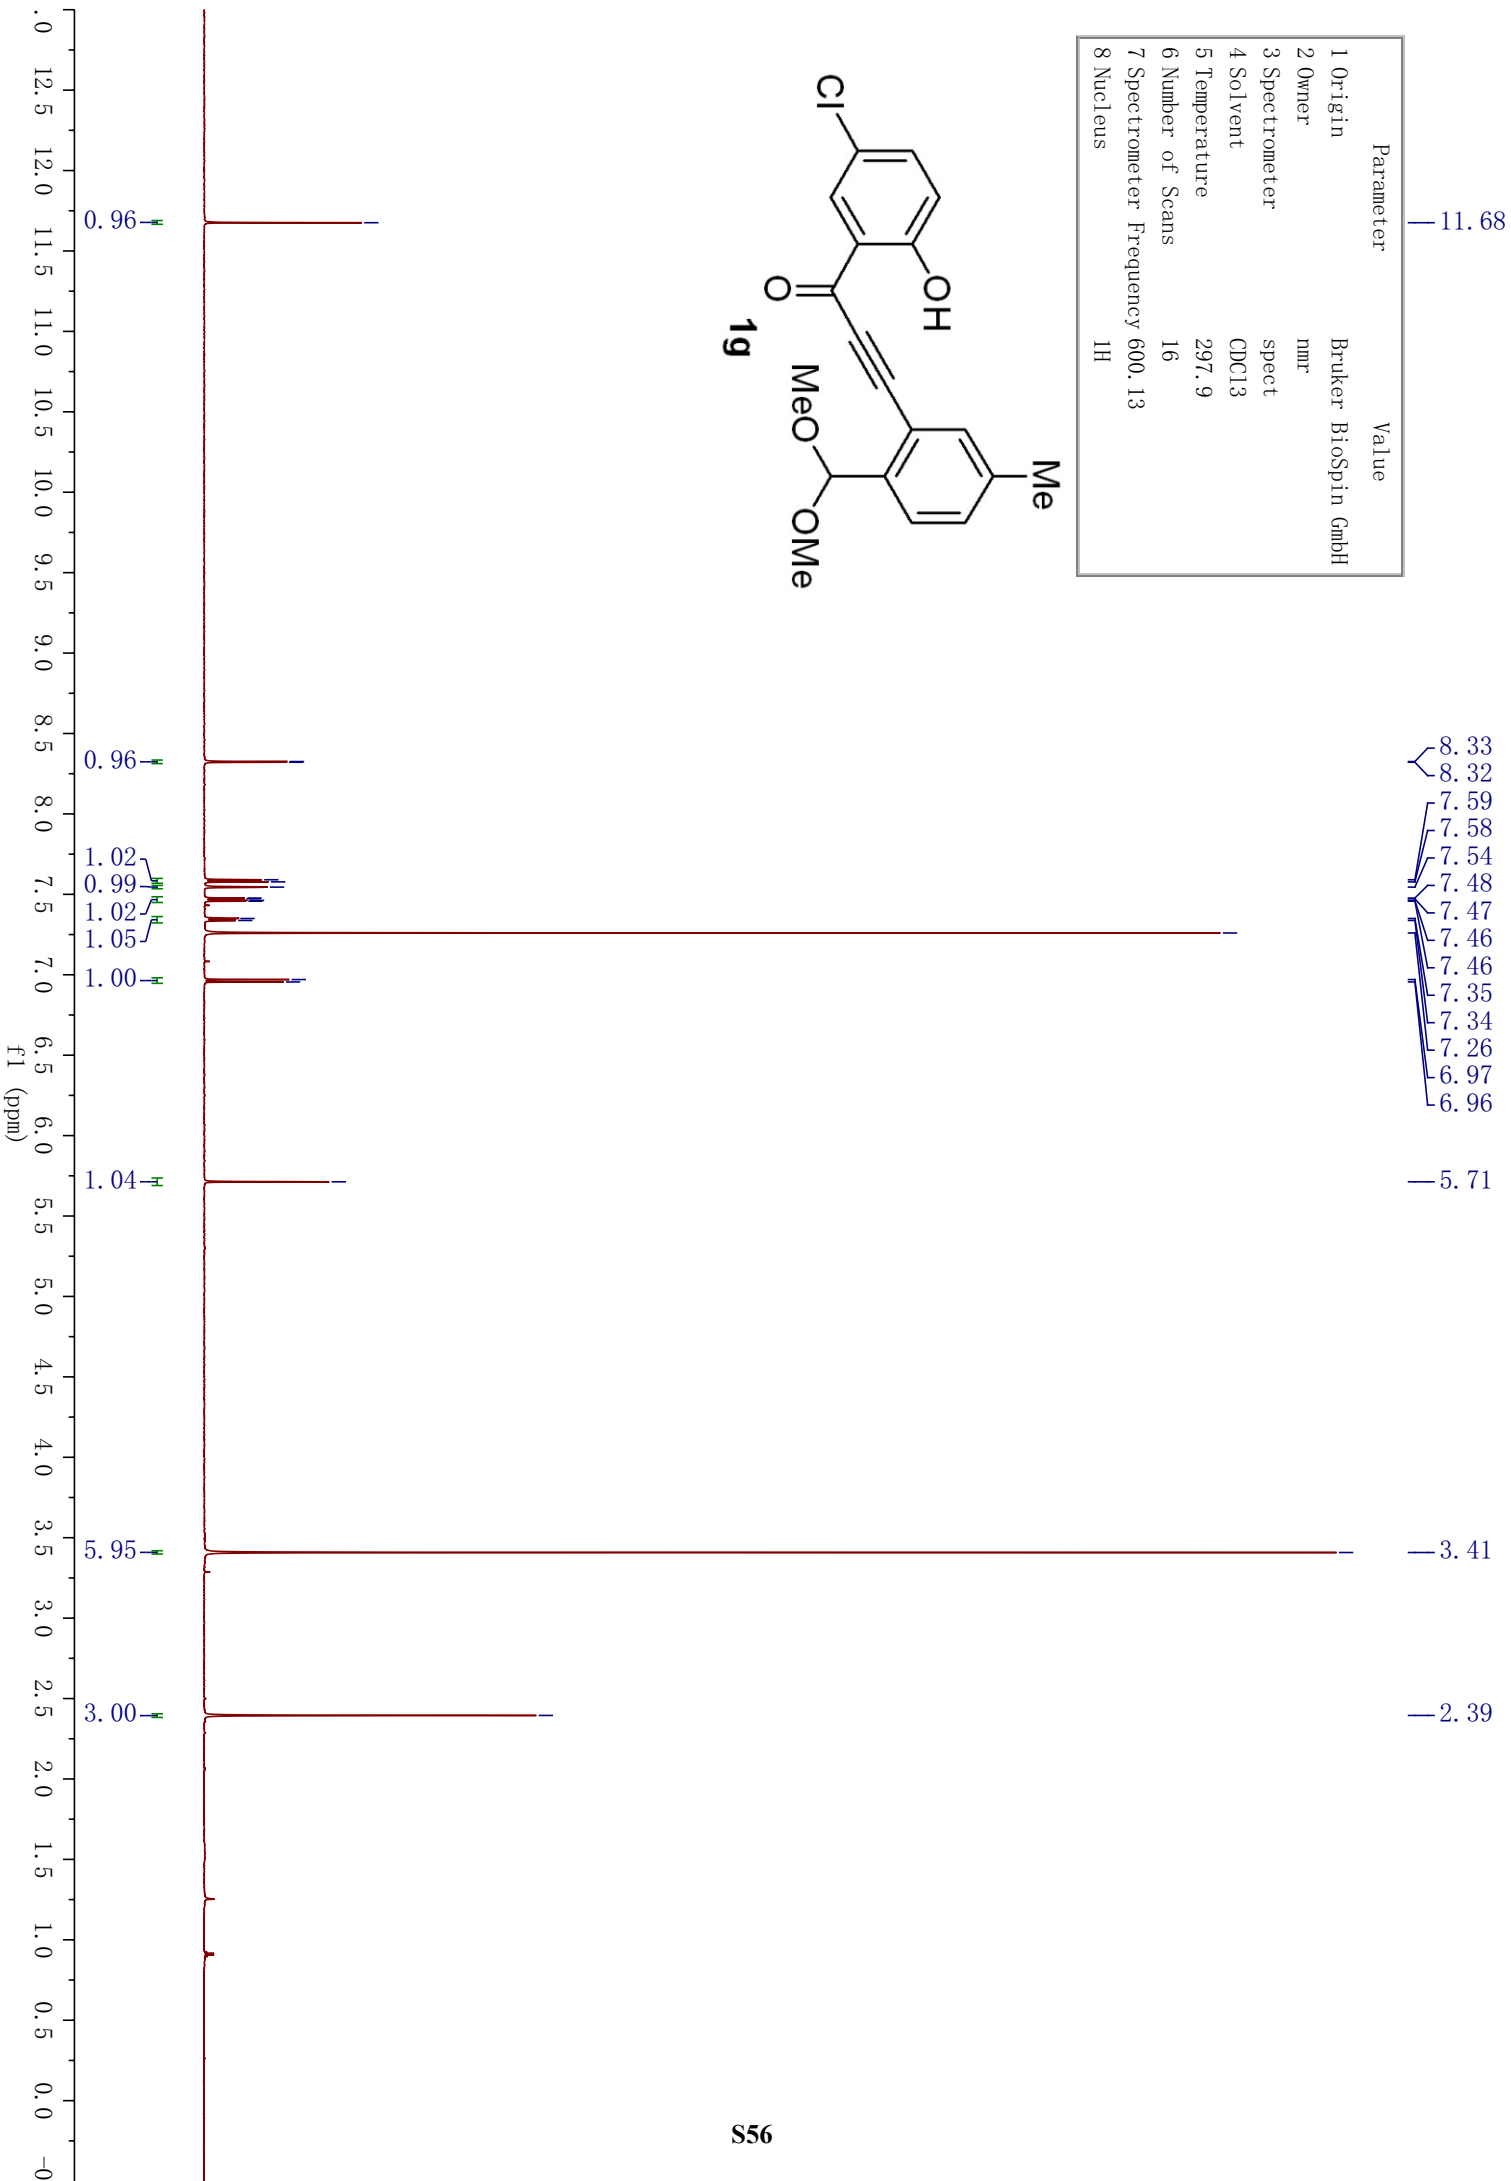

| Parameter                | Value               |
|--------------------------|---------------------|
| 1 Origin                 | Brüker Biospin GmbH |
| 2 Owner                  | nmr                 |
| 3 Spectrometer           | spect               |
| 4 Solvent                | CDCl3               |
| 5 Temperature            | 297.9               |
| 6 Number of Scans        | 978                 |
| 7 Spectrometer Frequency | 150.90              |
| 8 Nucleus                | <sup>13</sup> C     |

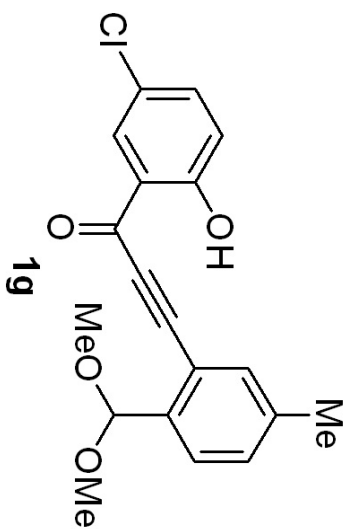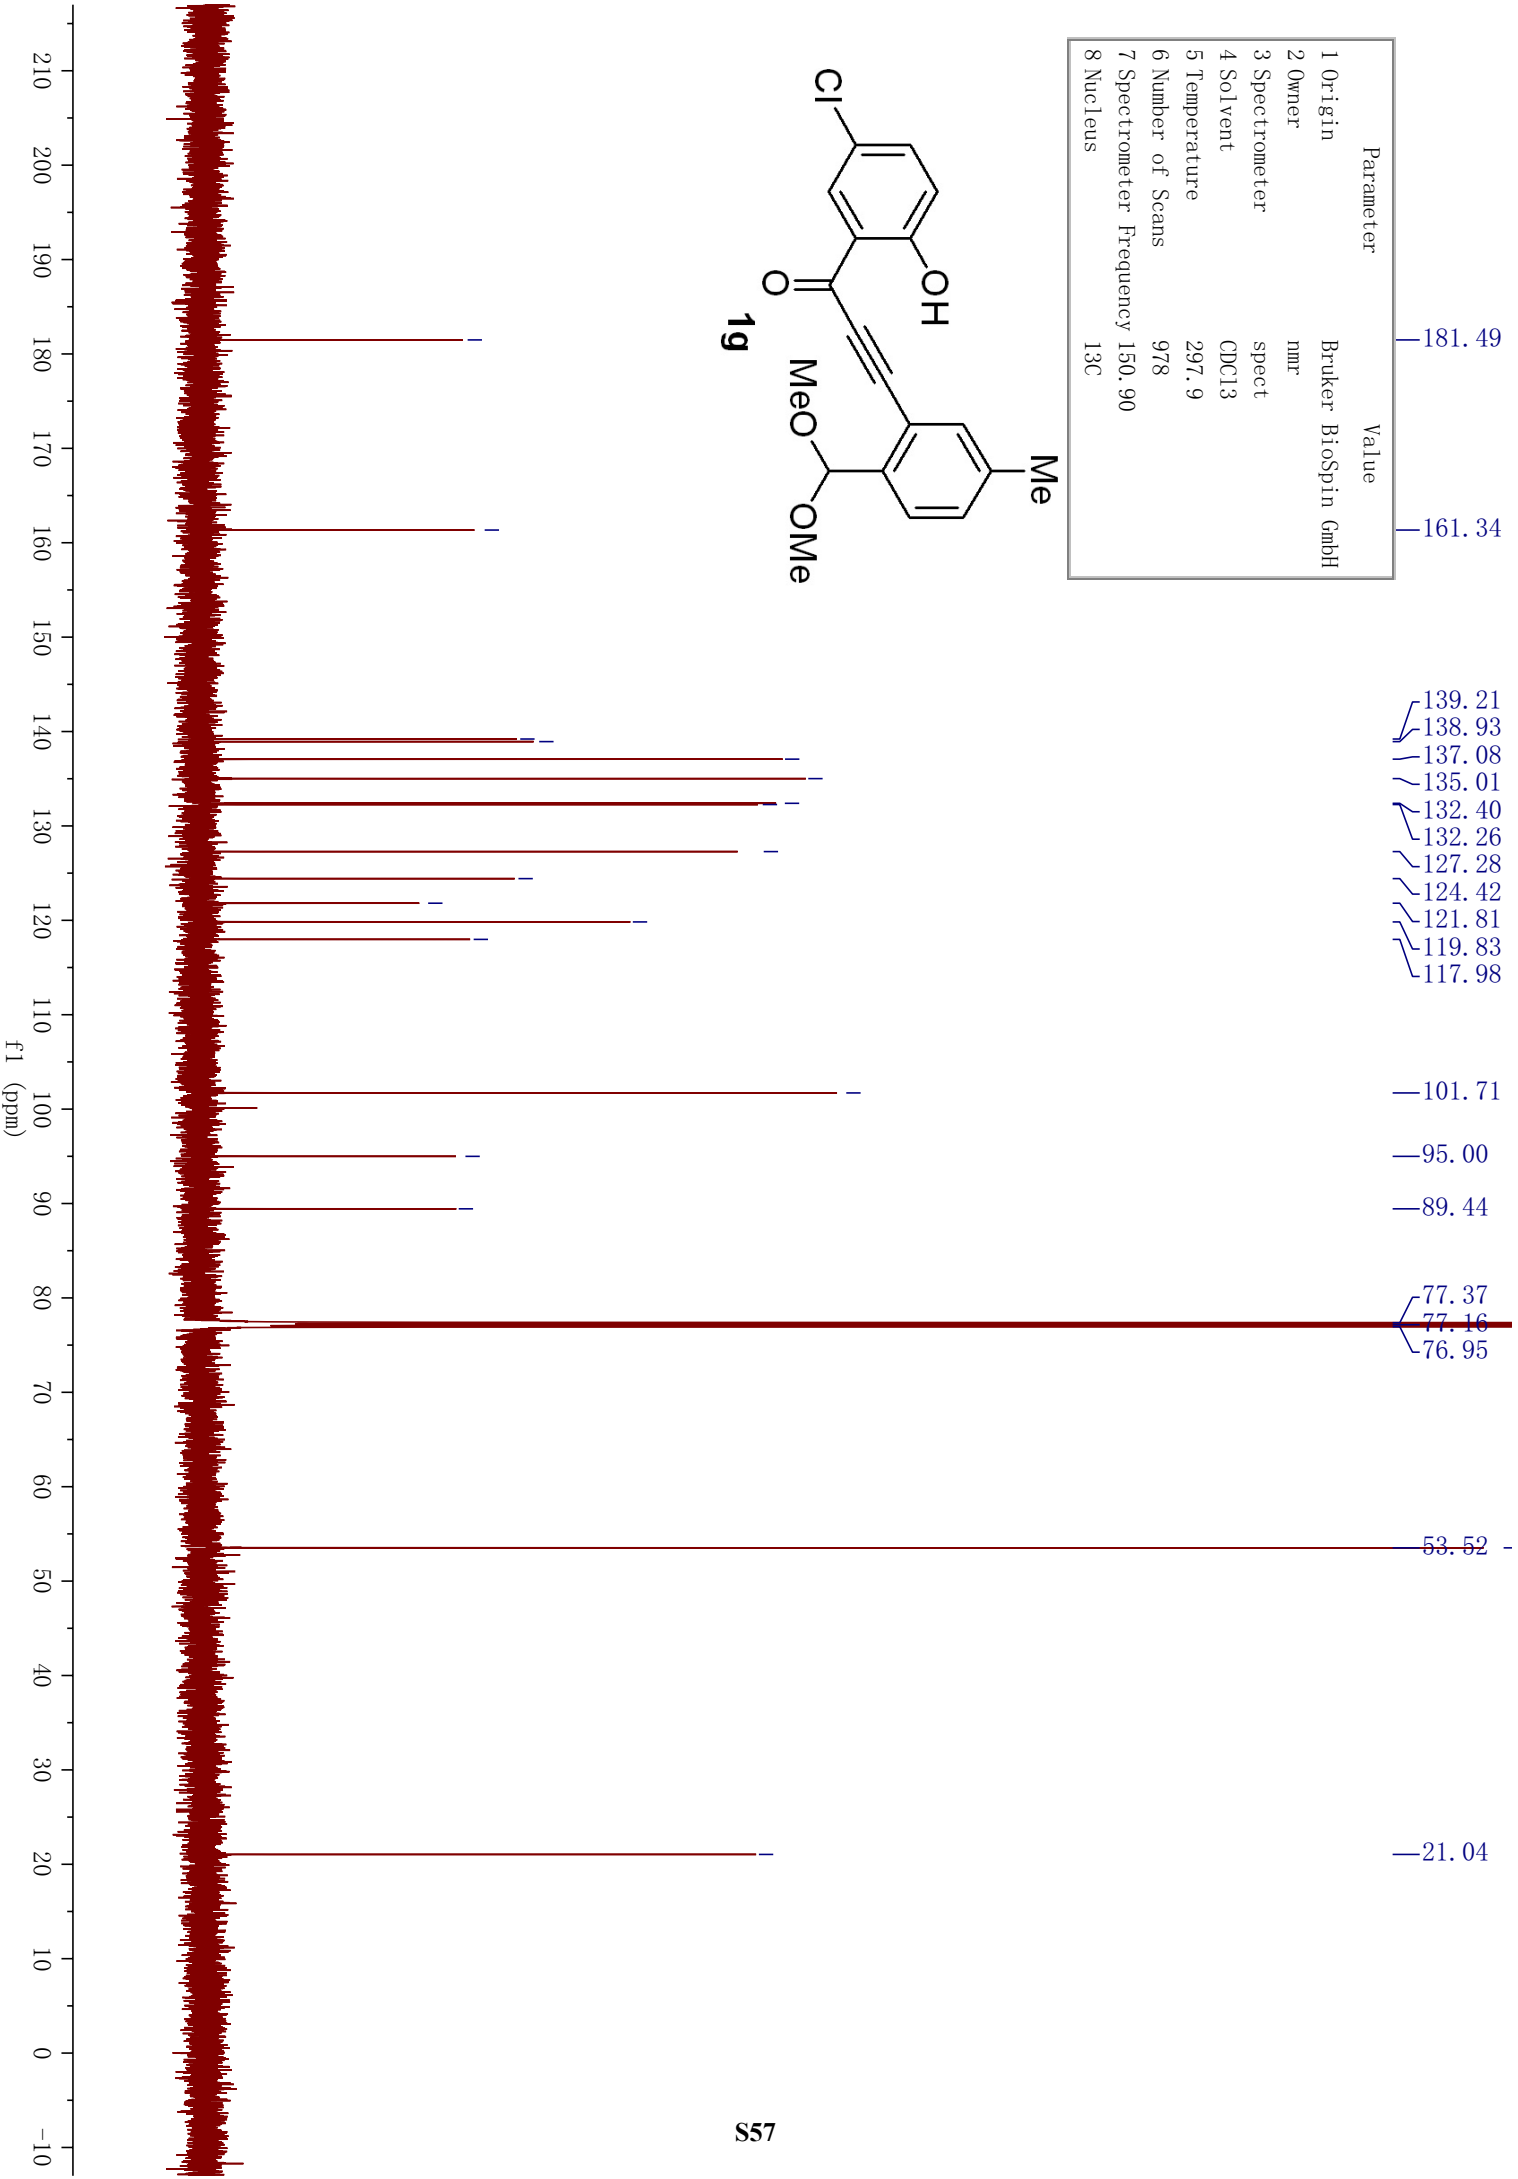

| Parameter                | Value               |
|--------------------------|---------------------|
| 1 Origin                 | Bruker Biospin GmbH |
| 2 Owner                  | nmr                 |
| 3 Spectrometer           | spect               |
| 4 Solvent                | CDCl3               |
| 5 Temperature            | 297.9               |
| 6 Number of Scans        | 16                  |
| 7 Spectrometer Frequency | 600.13              |
| 8 Nucleus                | 1H                  |

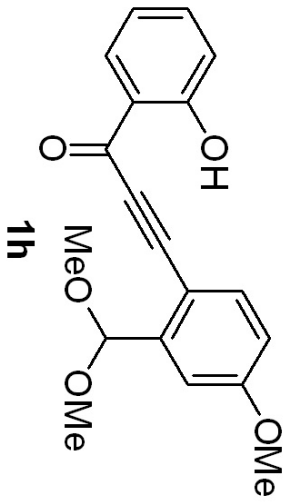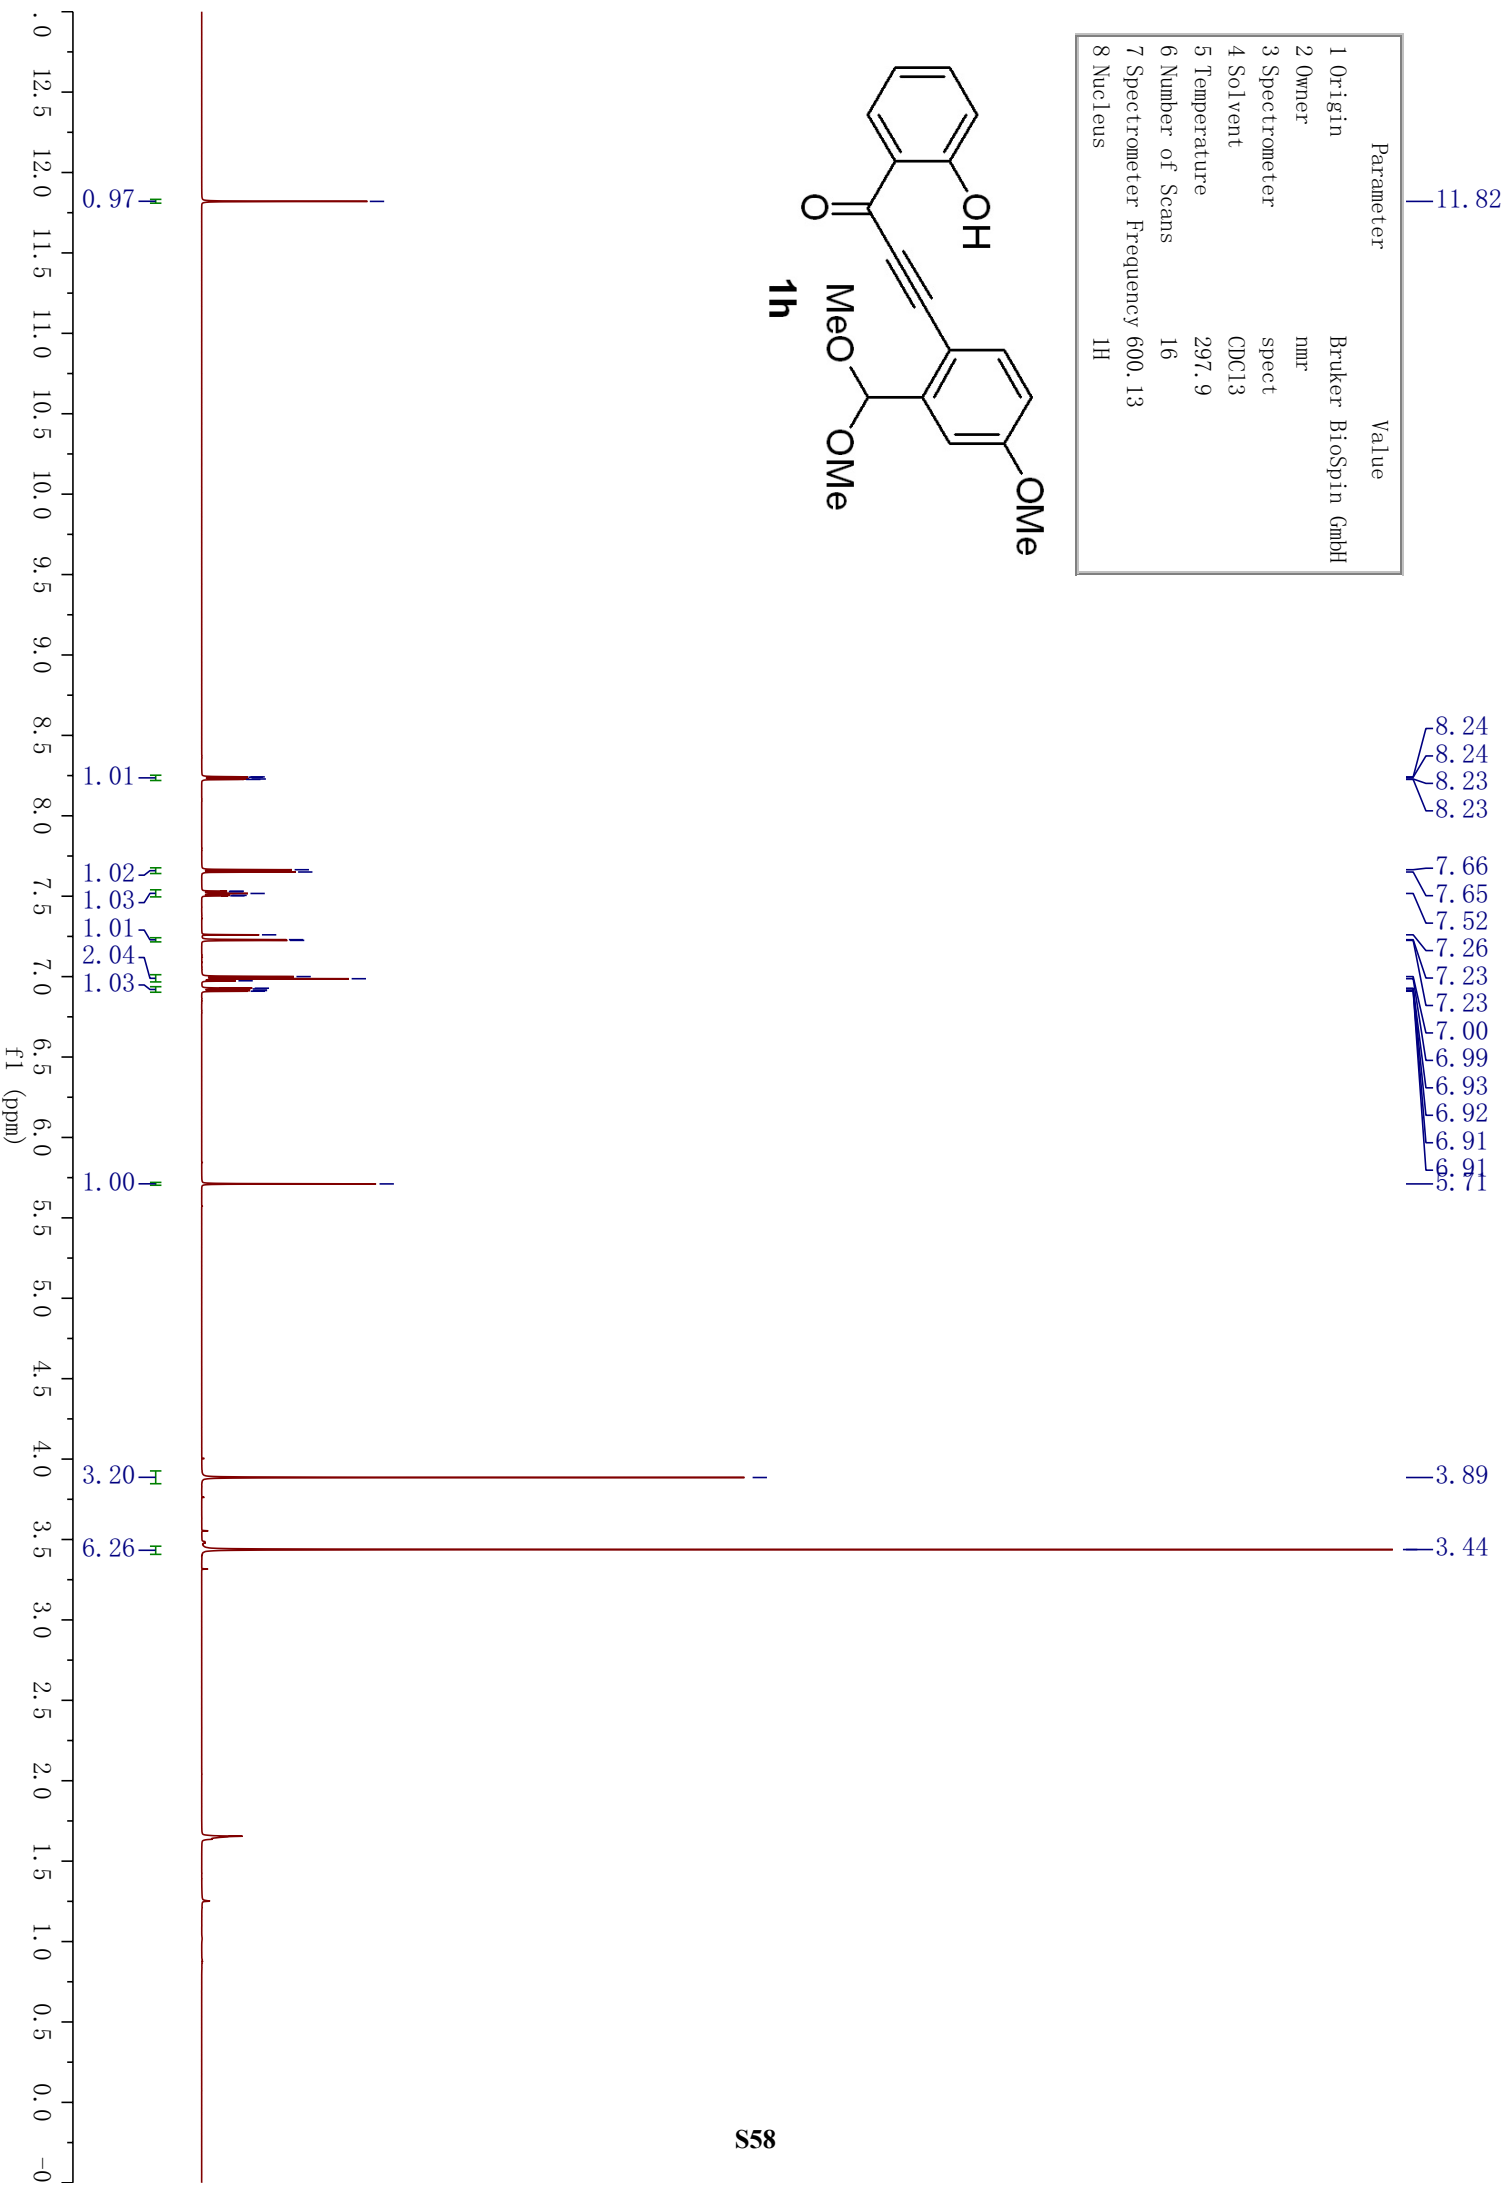

| Parameter                | Value                |
|--------------------------|----------------------|
| 1 Origin                 | Brucker BioSpin GmbH |
| 2 Owner                  | nmr                  |
| 3 Spectrometer           | spect                |
| 4 Solvent                | CDCl3                |
| 5 Temperature            | 297.9                |
| 6 Number of Scans        | 2488                 |
| 7 Spectrometer Frequency | 150.90               |
| 8 Nucleus                | <sup>13</sup> C      |

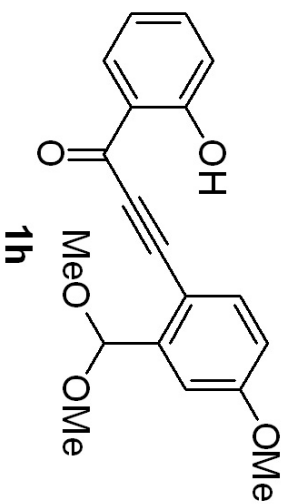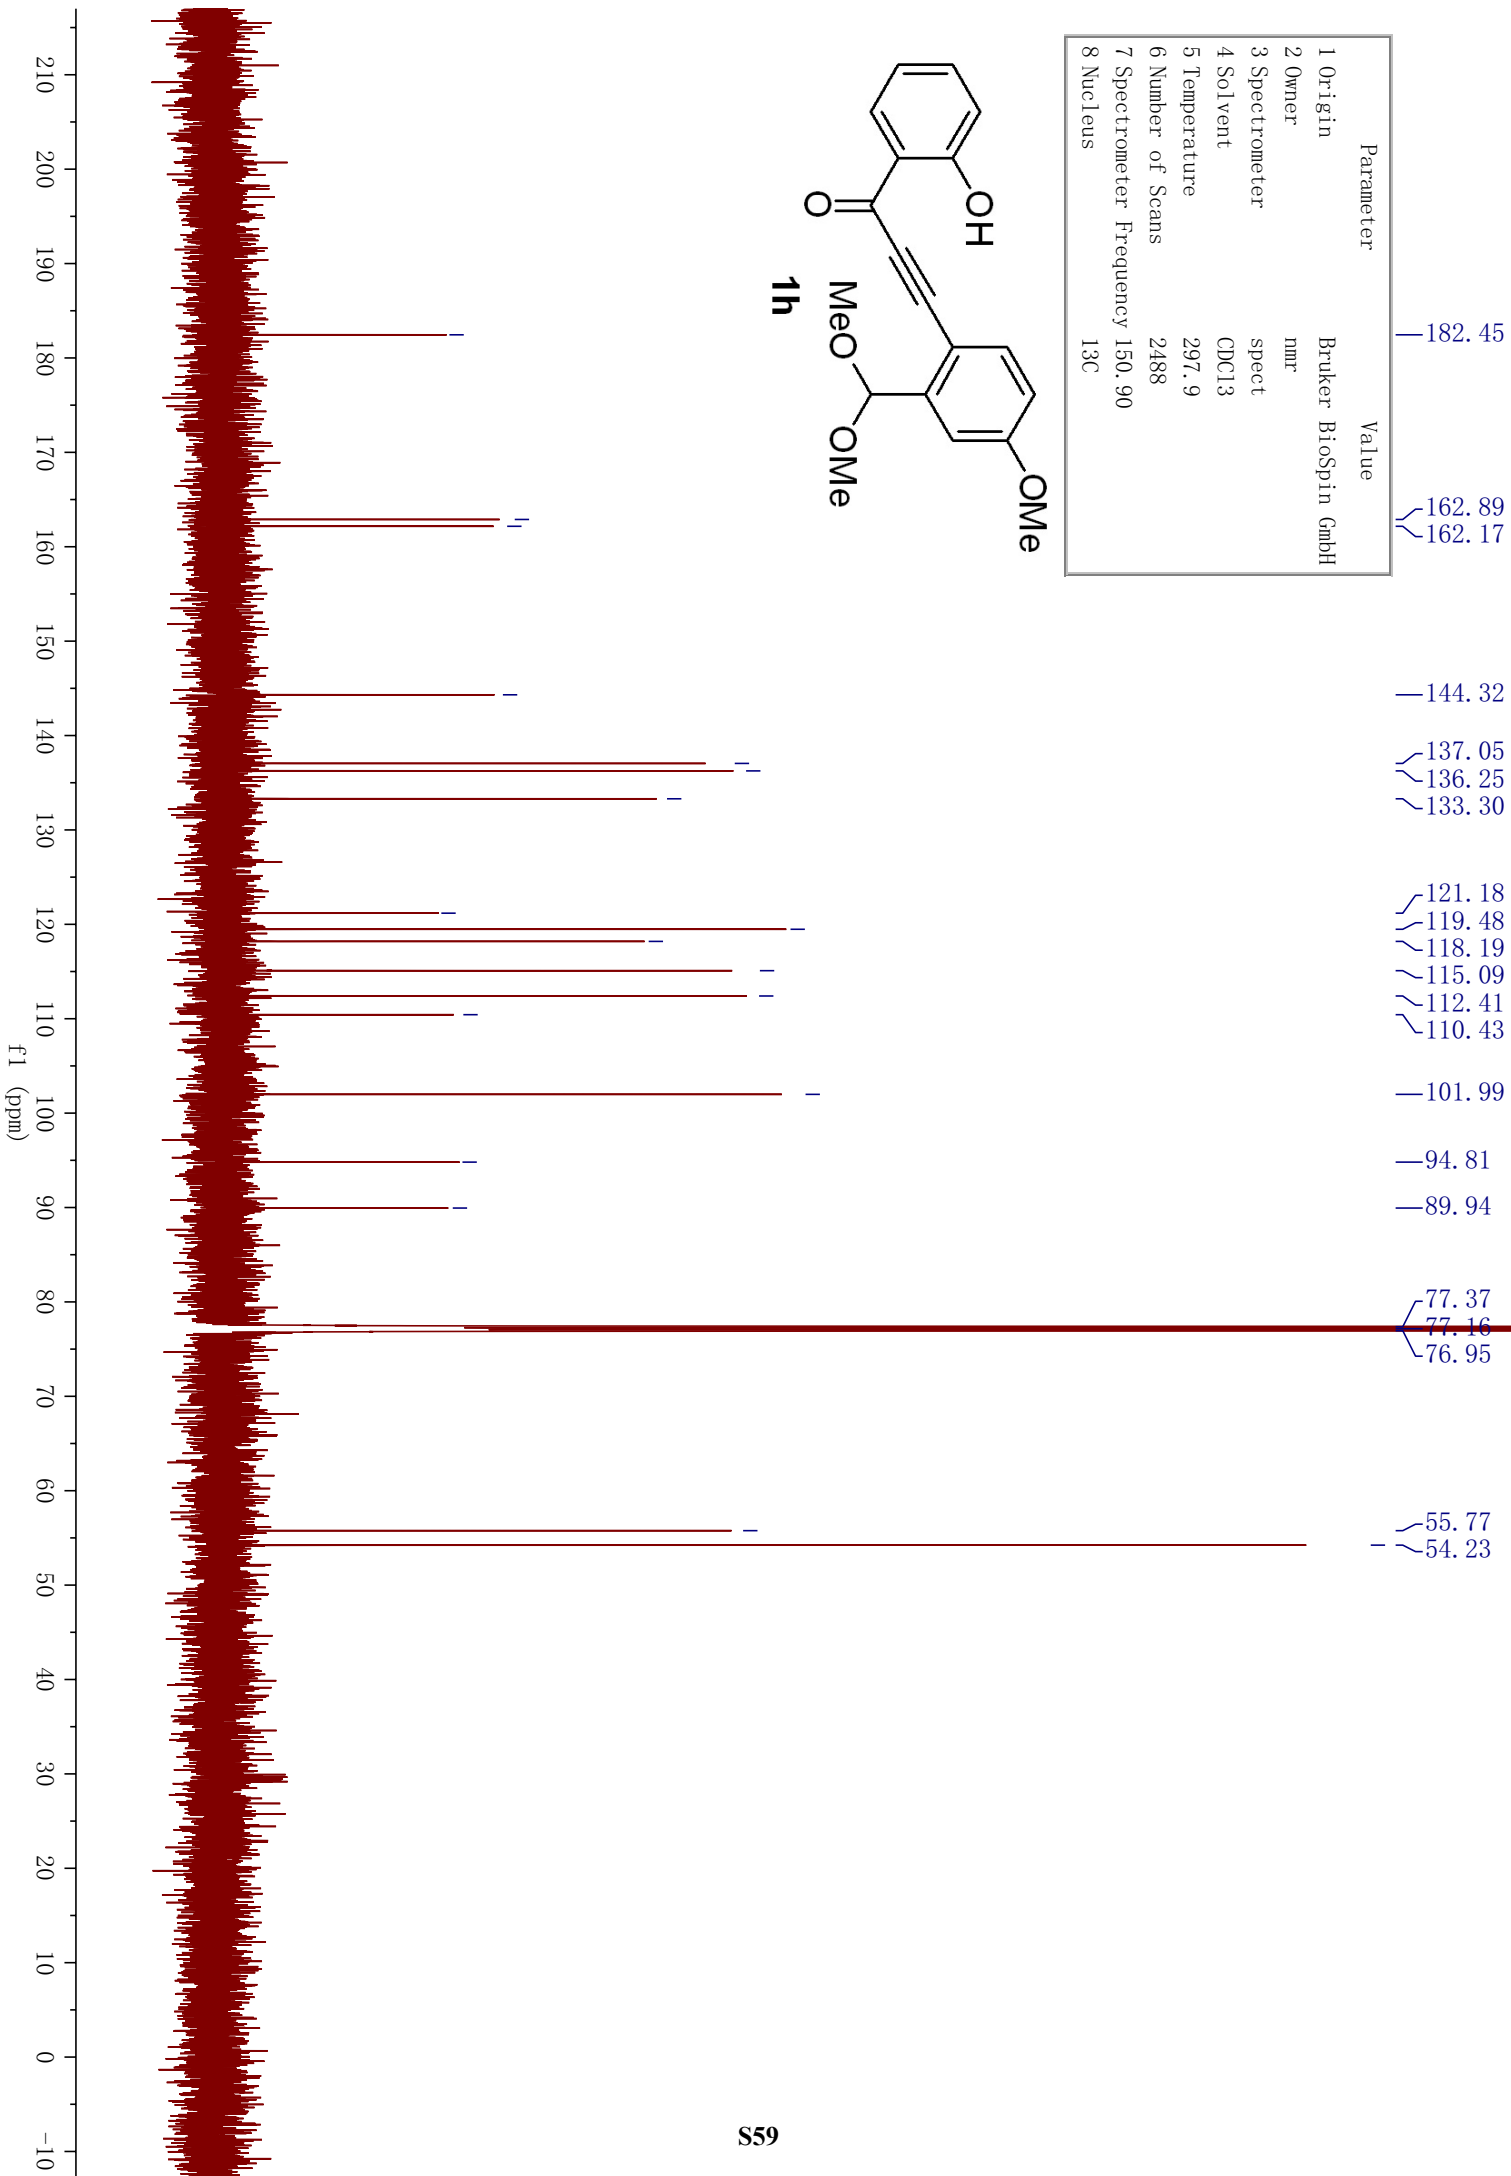



| Parameter                | Value                |
|--------------------------|----------------------|
| 1 Origin                 | Brucker Biospin GmbH |
| 2 Owner                  | nmr                  |
| 3 Spectrometer           | spect                |
| 4 Solvent                | CDCl3                |
| 5 Temperature            | 297.9                |
| 6 Number of Scans        | 16                   |
| 7 Spectrometer Frequency | 600.13               |
| 8 Nucleus                | <sup>1</sup> H       |

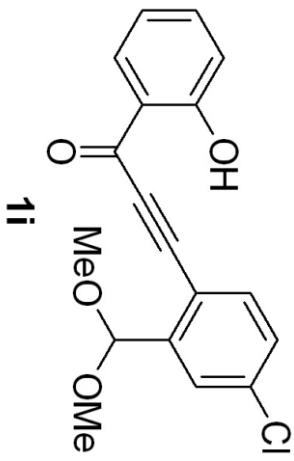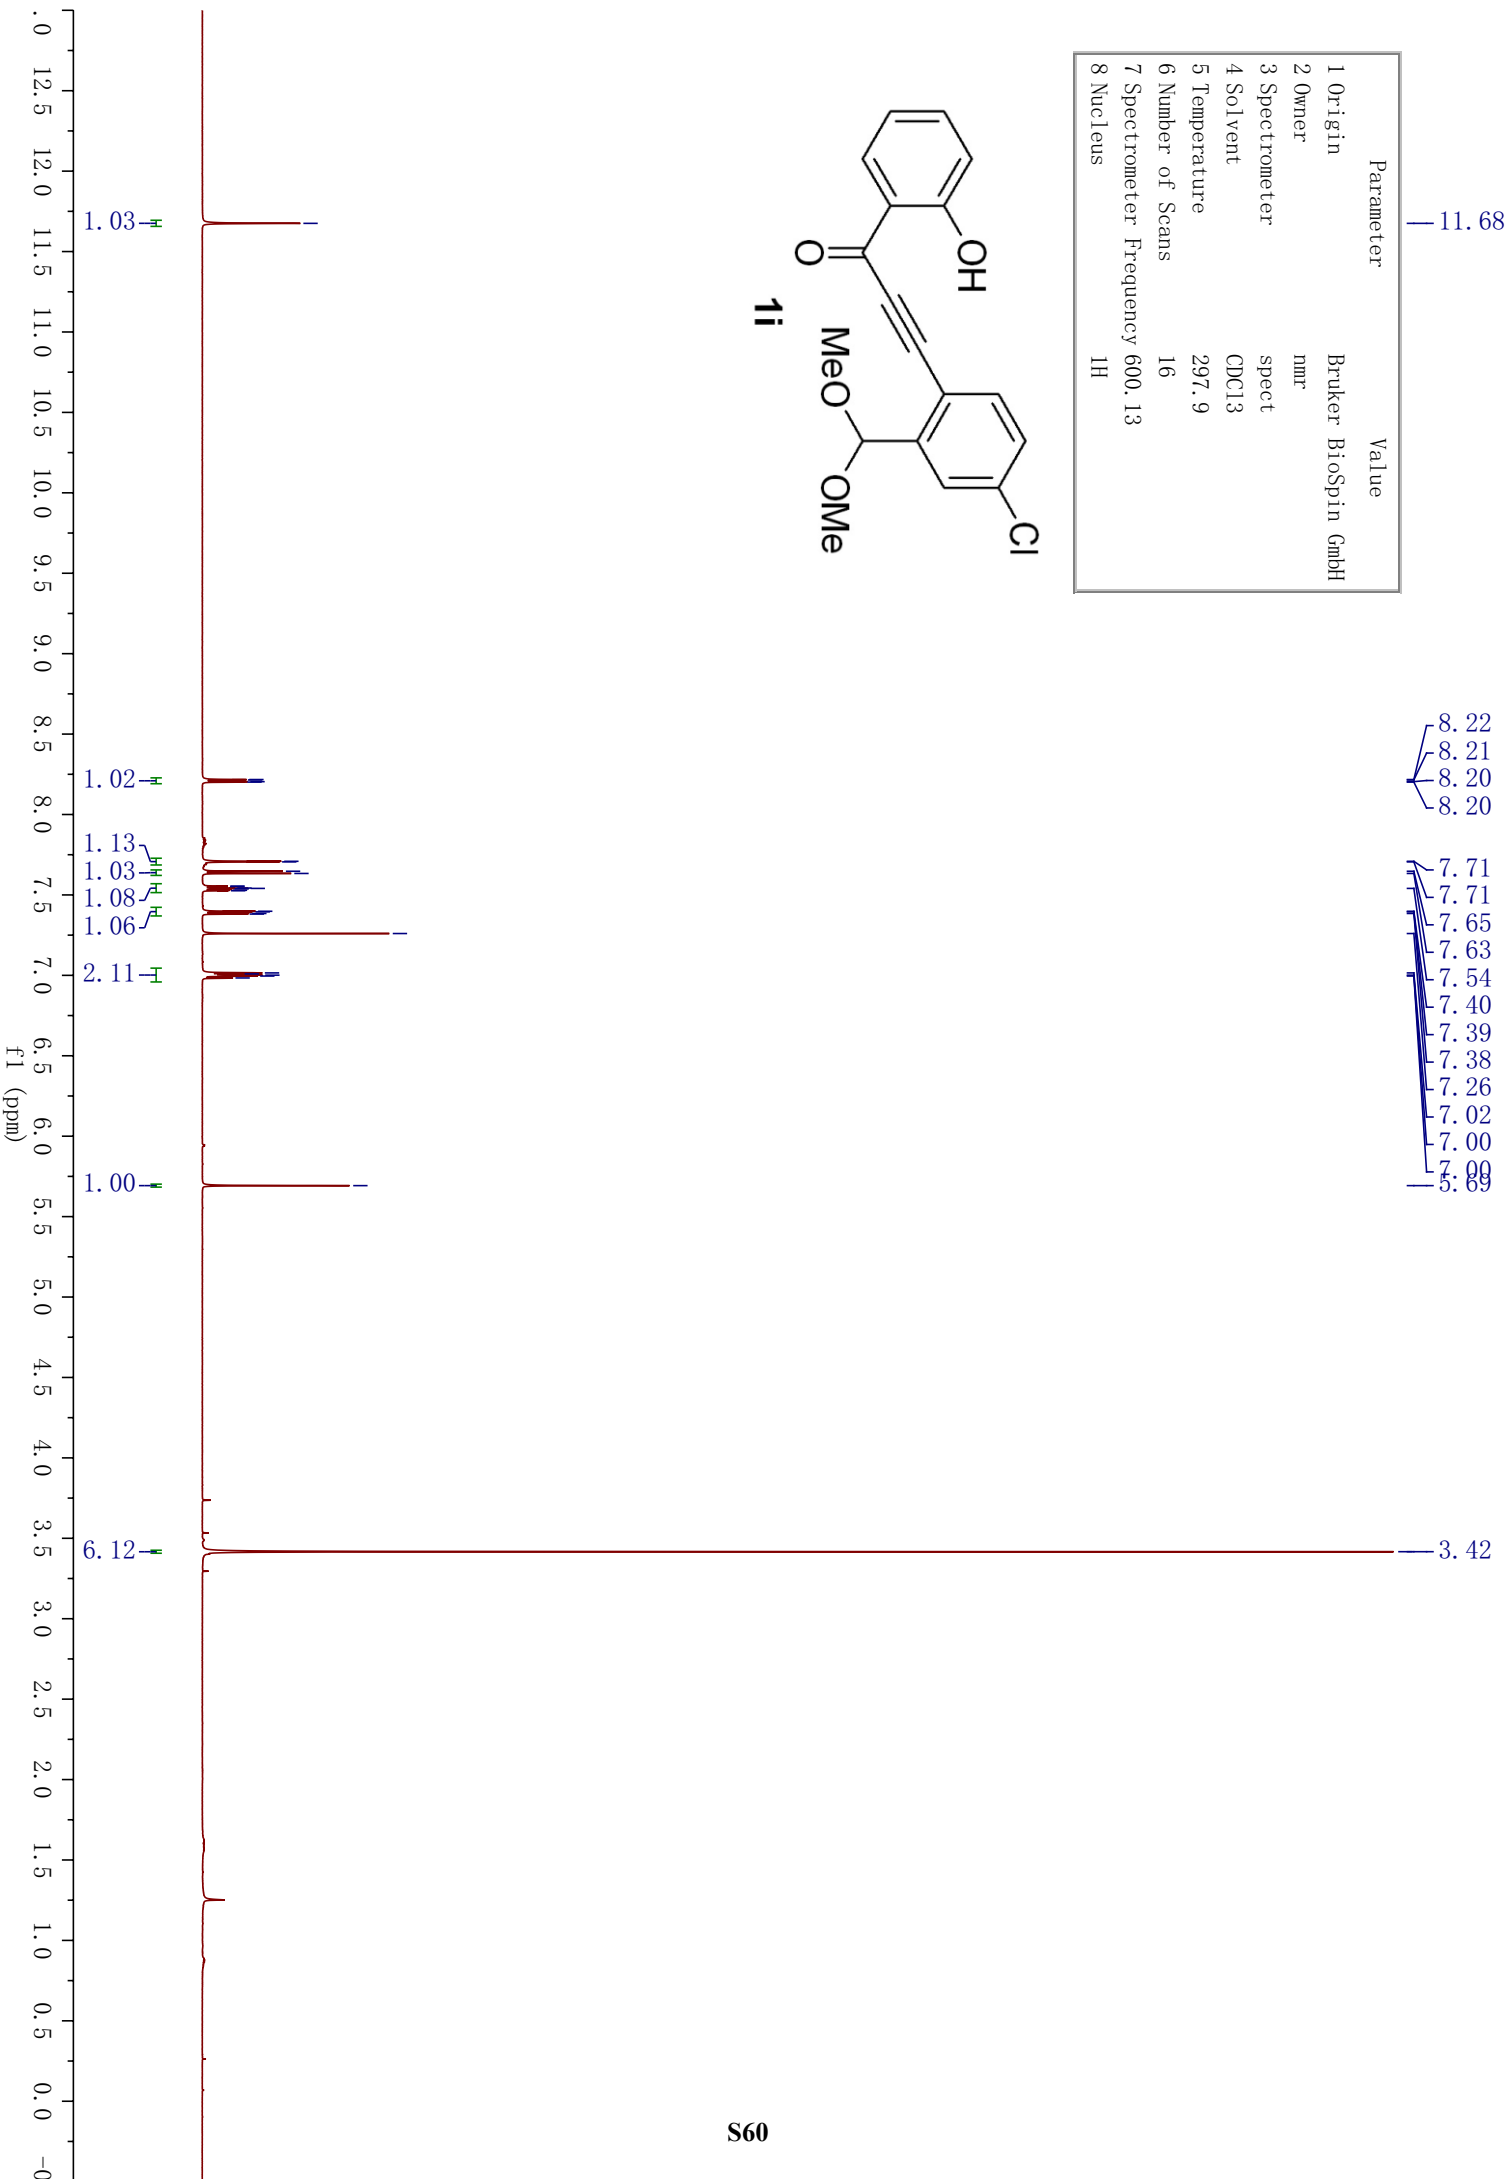

| Parameter                | Value                |
|--------------------------|----------------------|
| 1 Origin                 | Brucker BioSpin GmbH |
| 2 Owner                  | nmr                  |
| 3 Spectrometer           | spect                |
| 4 Solvent                | CDCl3                |
| 5 Temperature            | 297.9                |
| 6 Number of Scans        | 1634                 |
| 7 Spectrometer Frequency | 150.90               |
| 8 Nucleus                | <sup>13</sup> C      |

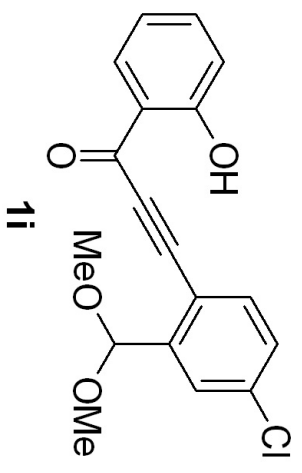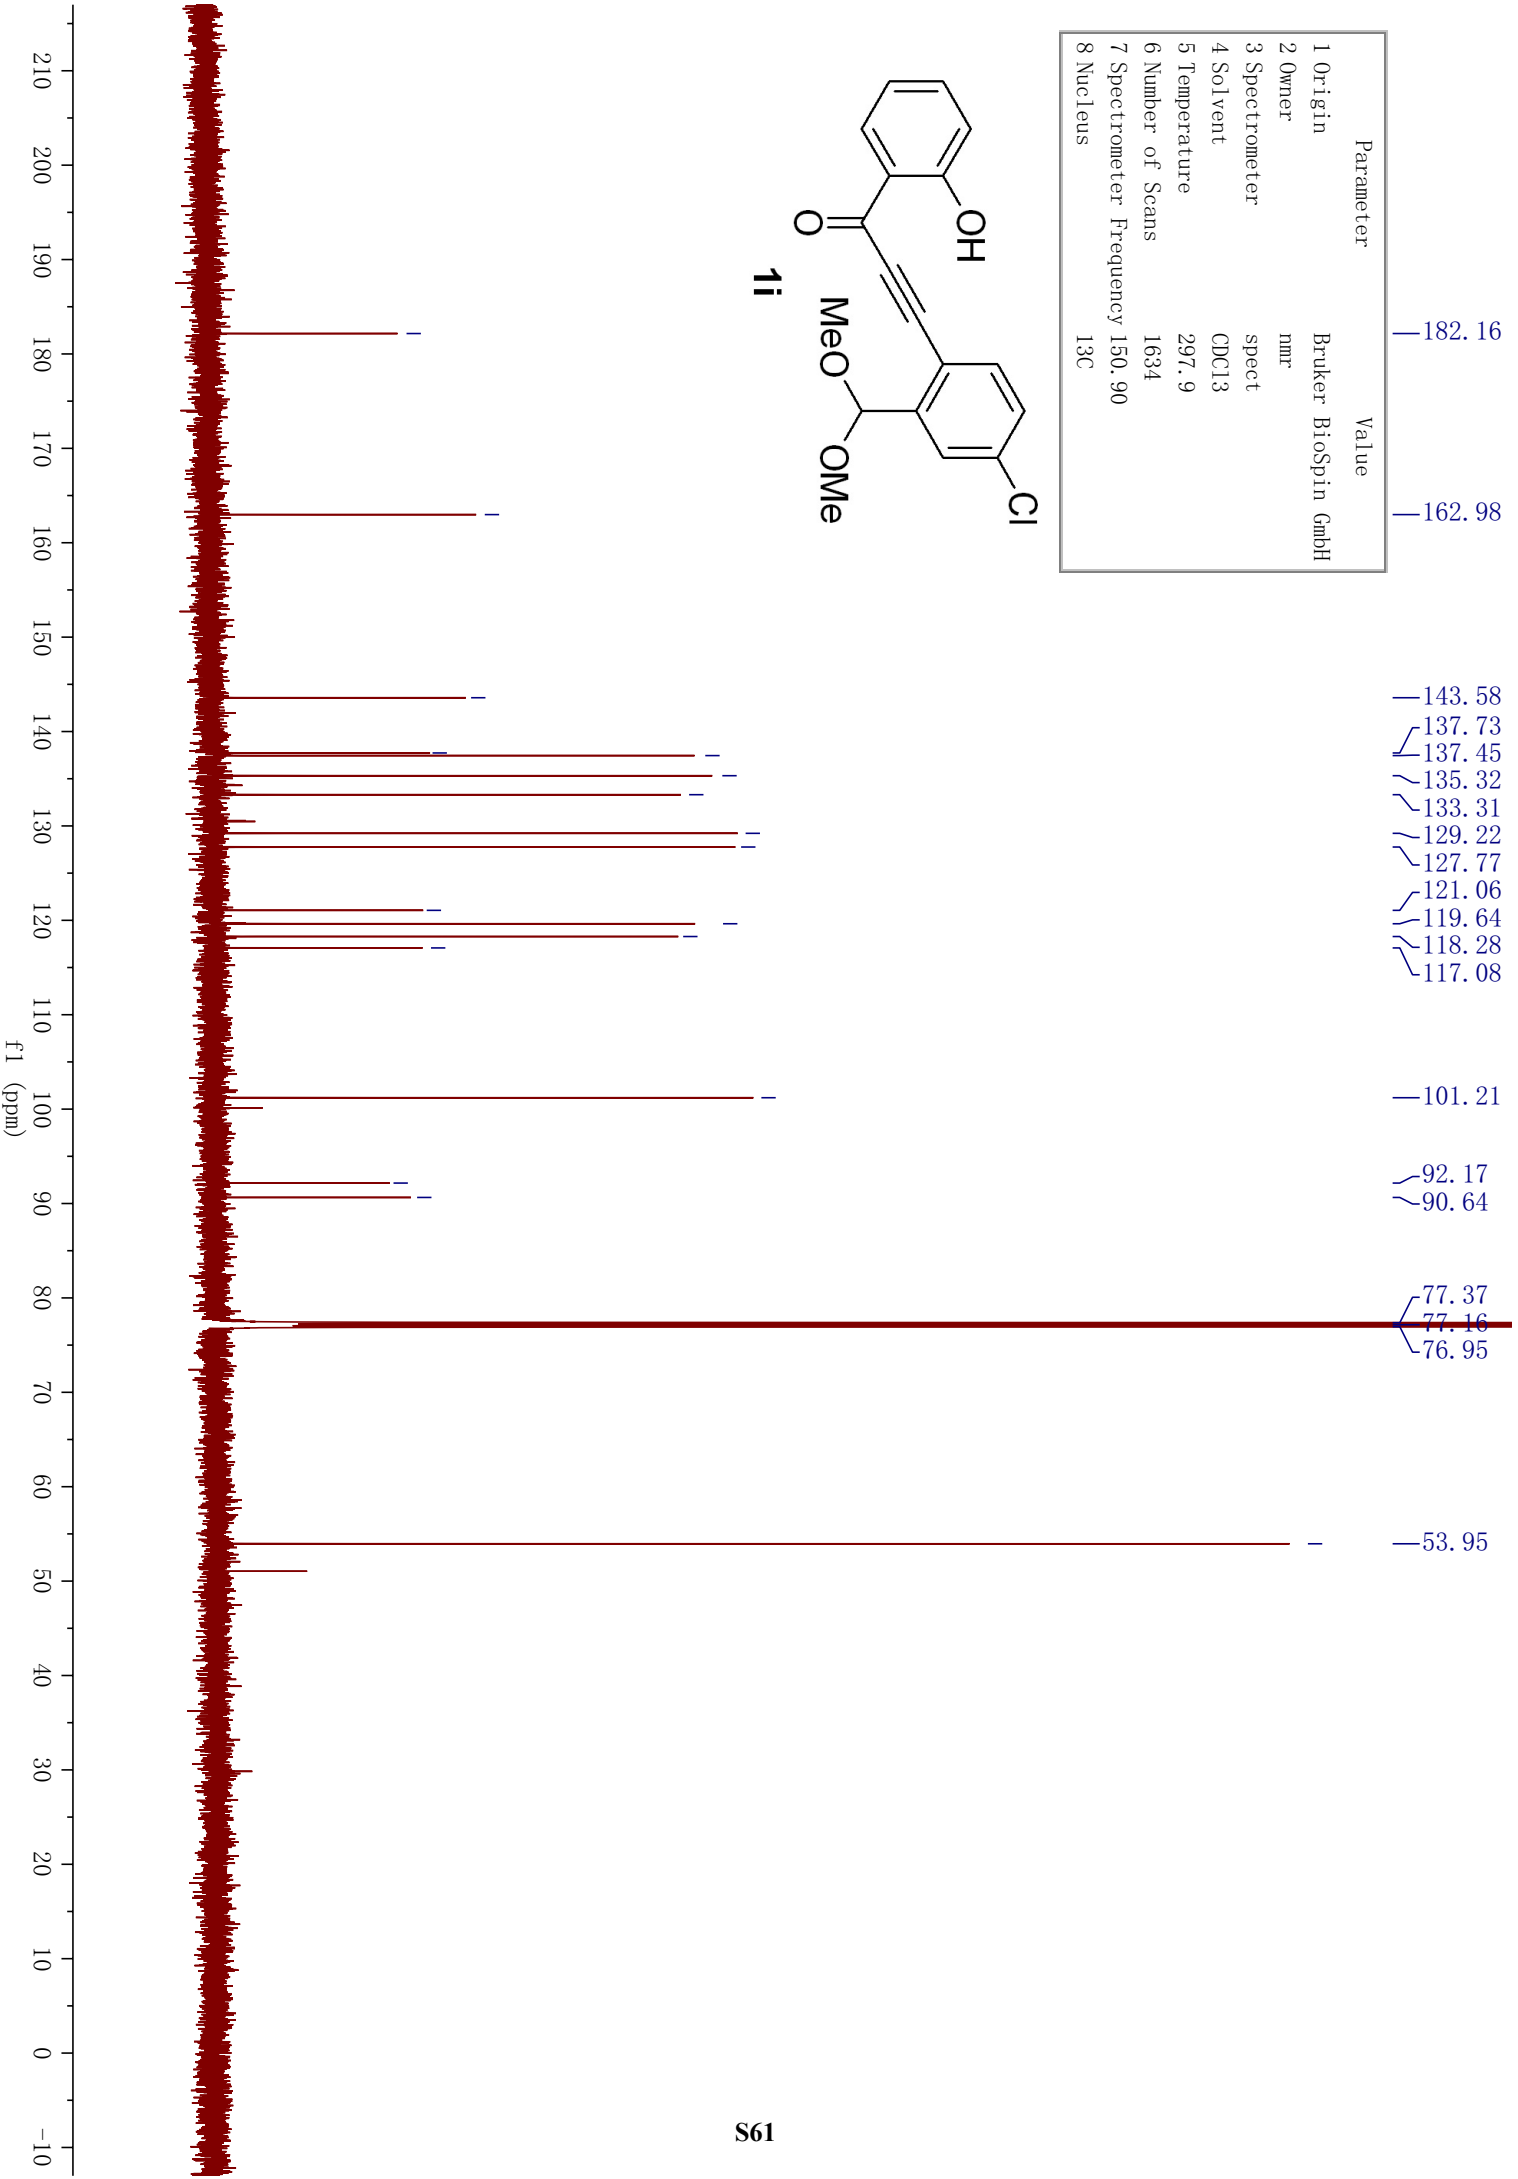

| Parameter                | Value                |
|--------------------------|----------------------|
| 1 Origin                 | Brucker BioSpin GmbH |
| 2 Owner                  | nmr                  |
| 3 Spectrometer           | spect                |
| 4 Solvent                | CDCl3                |
| 5 Temperature            | 297.9                |
| 6 Number of Scans        | 16                   |
| 7 Spectrometer Frequency | 600.13               |
| 8 Nucleus                | <sup>1</sup> H       |

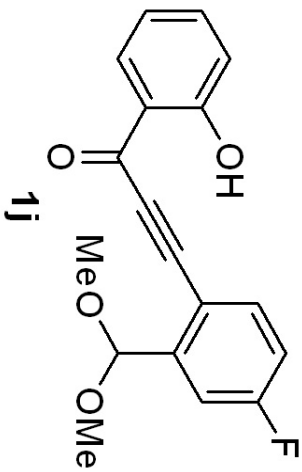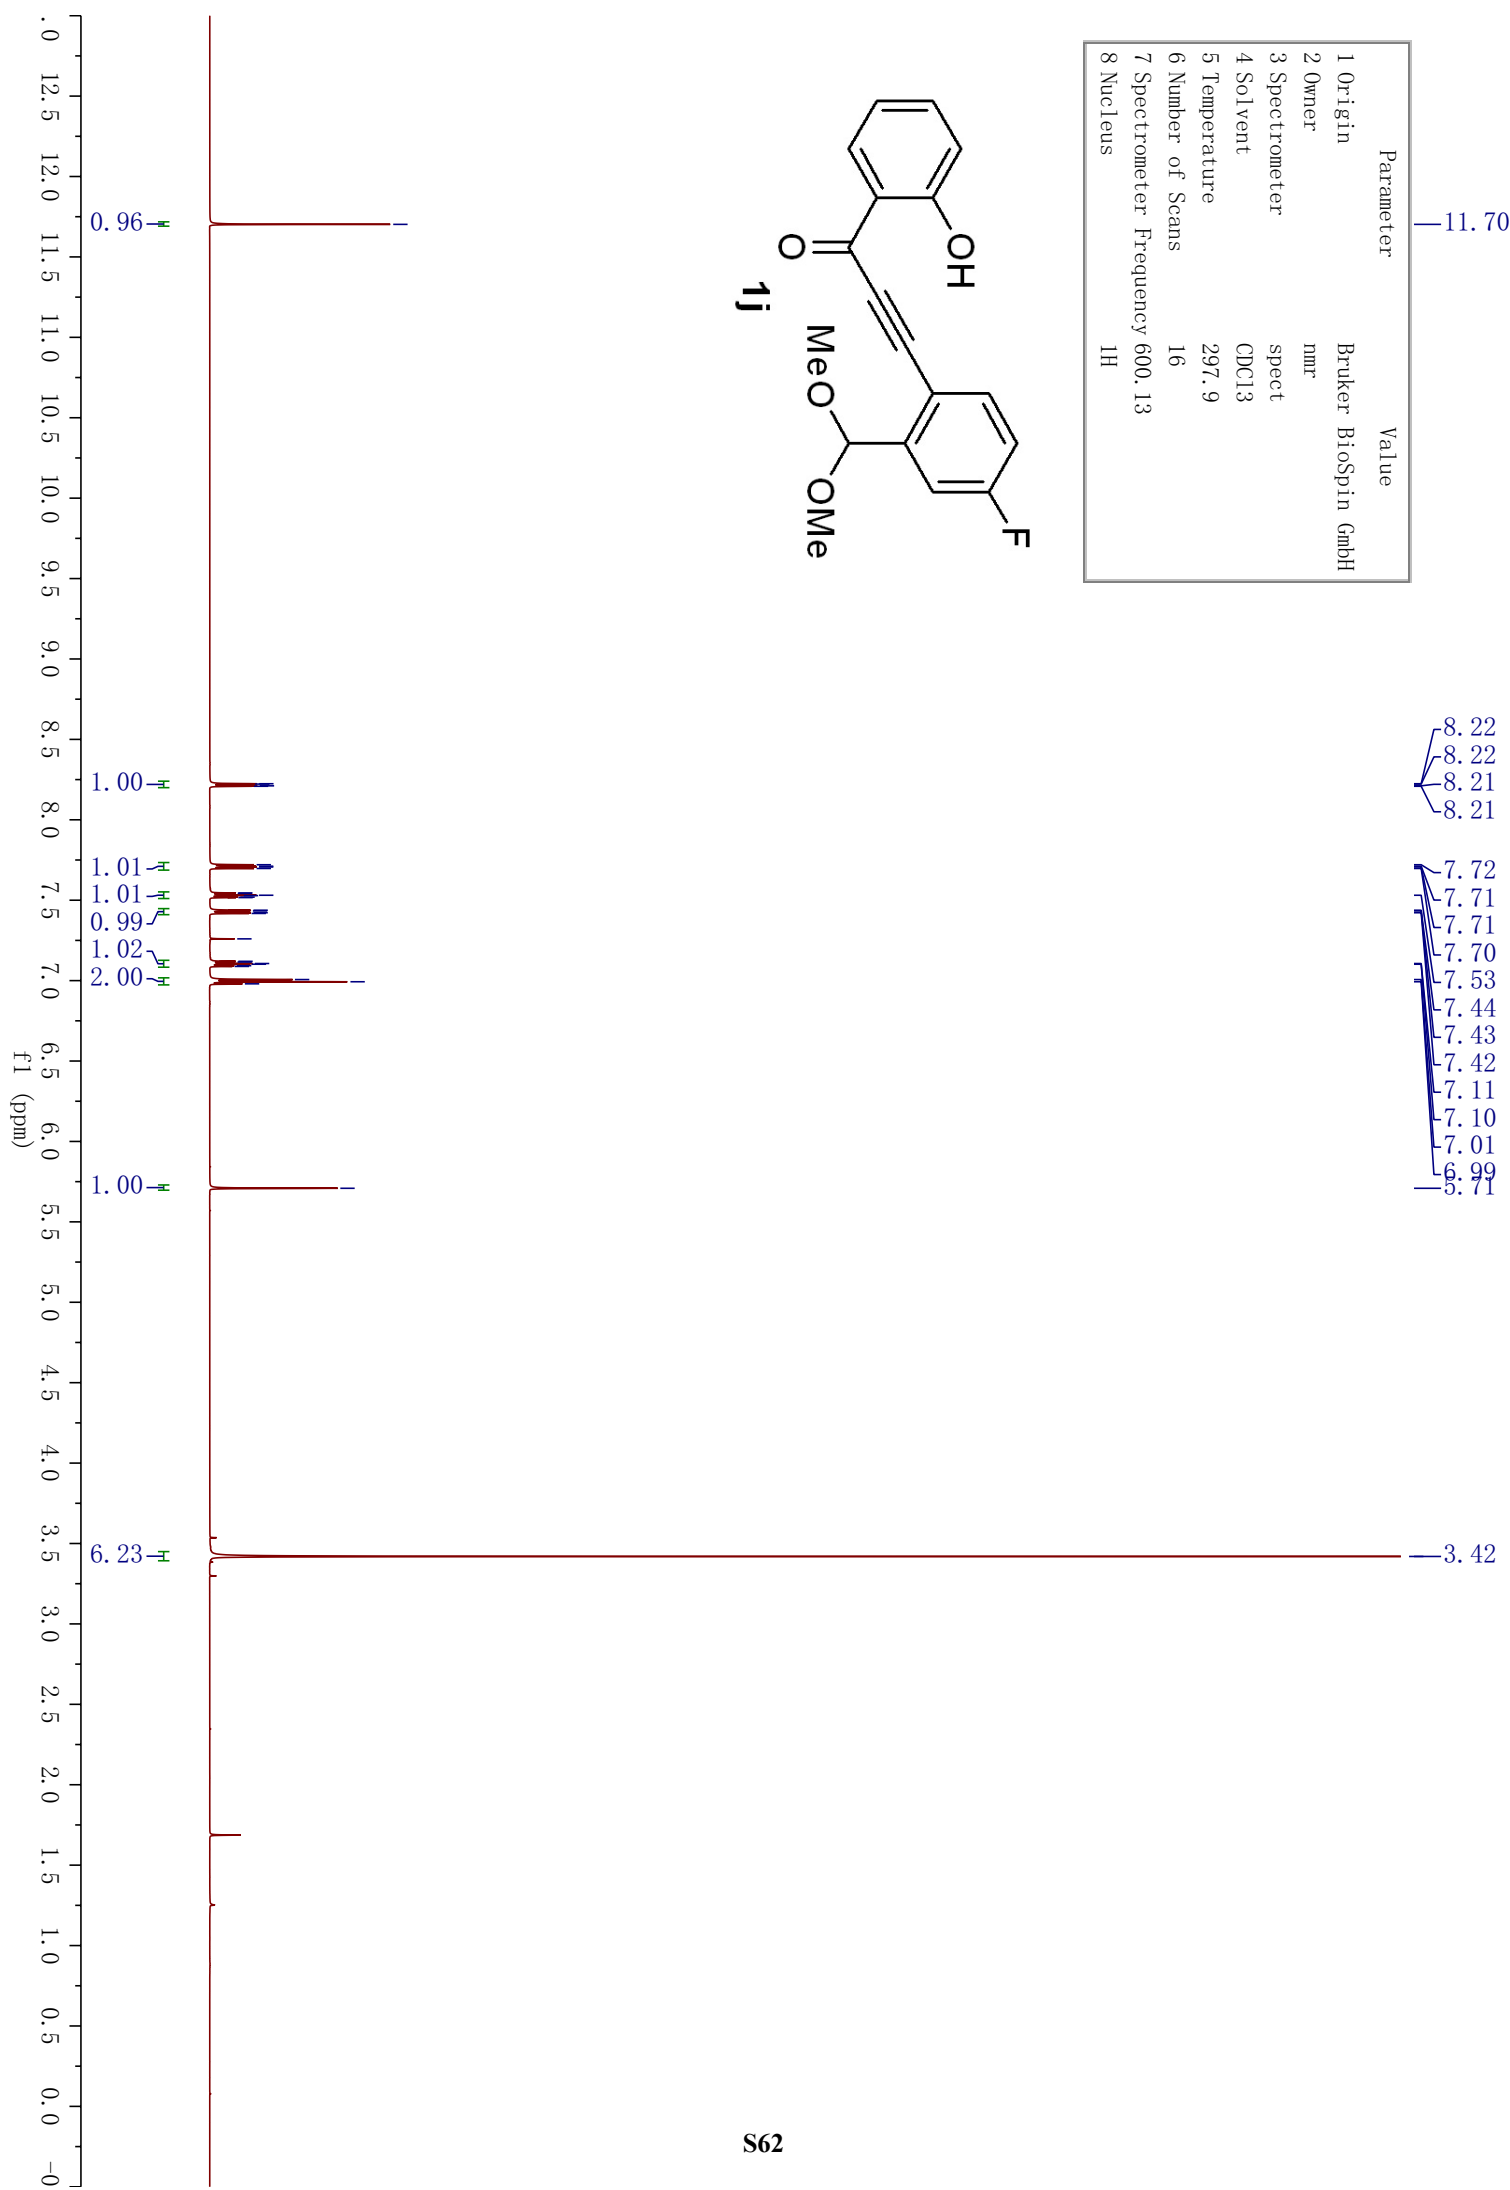

| Parameter                | Value               |
|--------------------------|---------------------|
| 1 Origin                 | Brüker Biospin GmbH |
| 2 Owner                  | nmr                 |
| 3 Spectrometer           | spect               |
| 4 Solvent                | CDCl3               |
| 5 Temperature            | 297.9               |
| 6 Number of Scans        | 434                 |
| 7 Spectrometer Frequency | 150.90              |
| 8 Nucleus                | <sup>13</sup> C     |

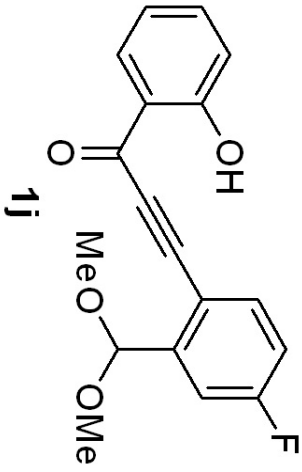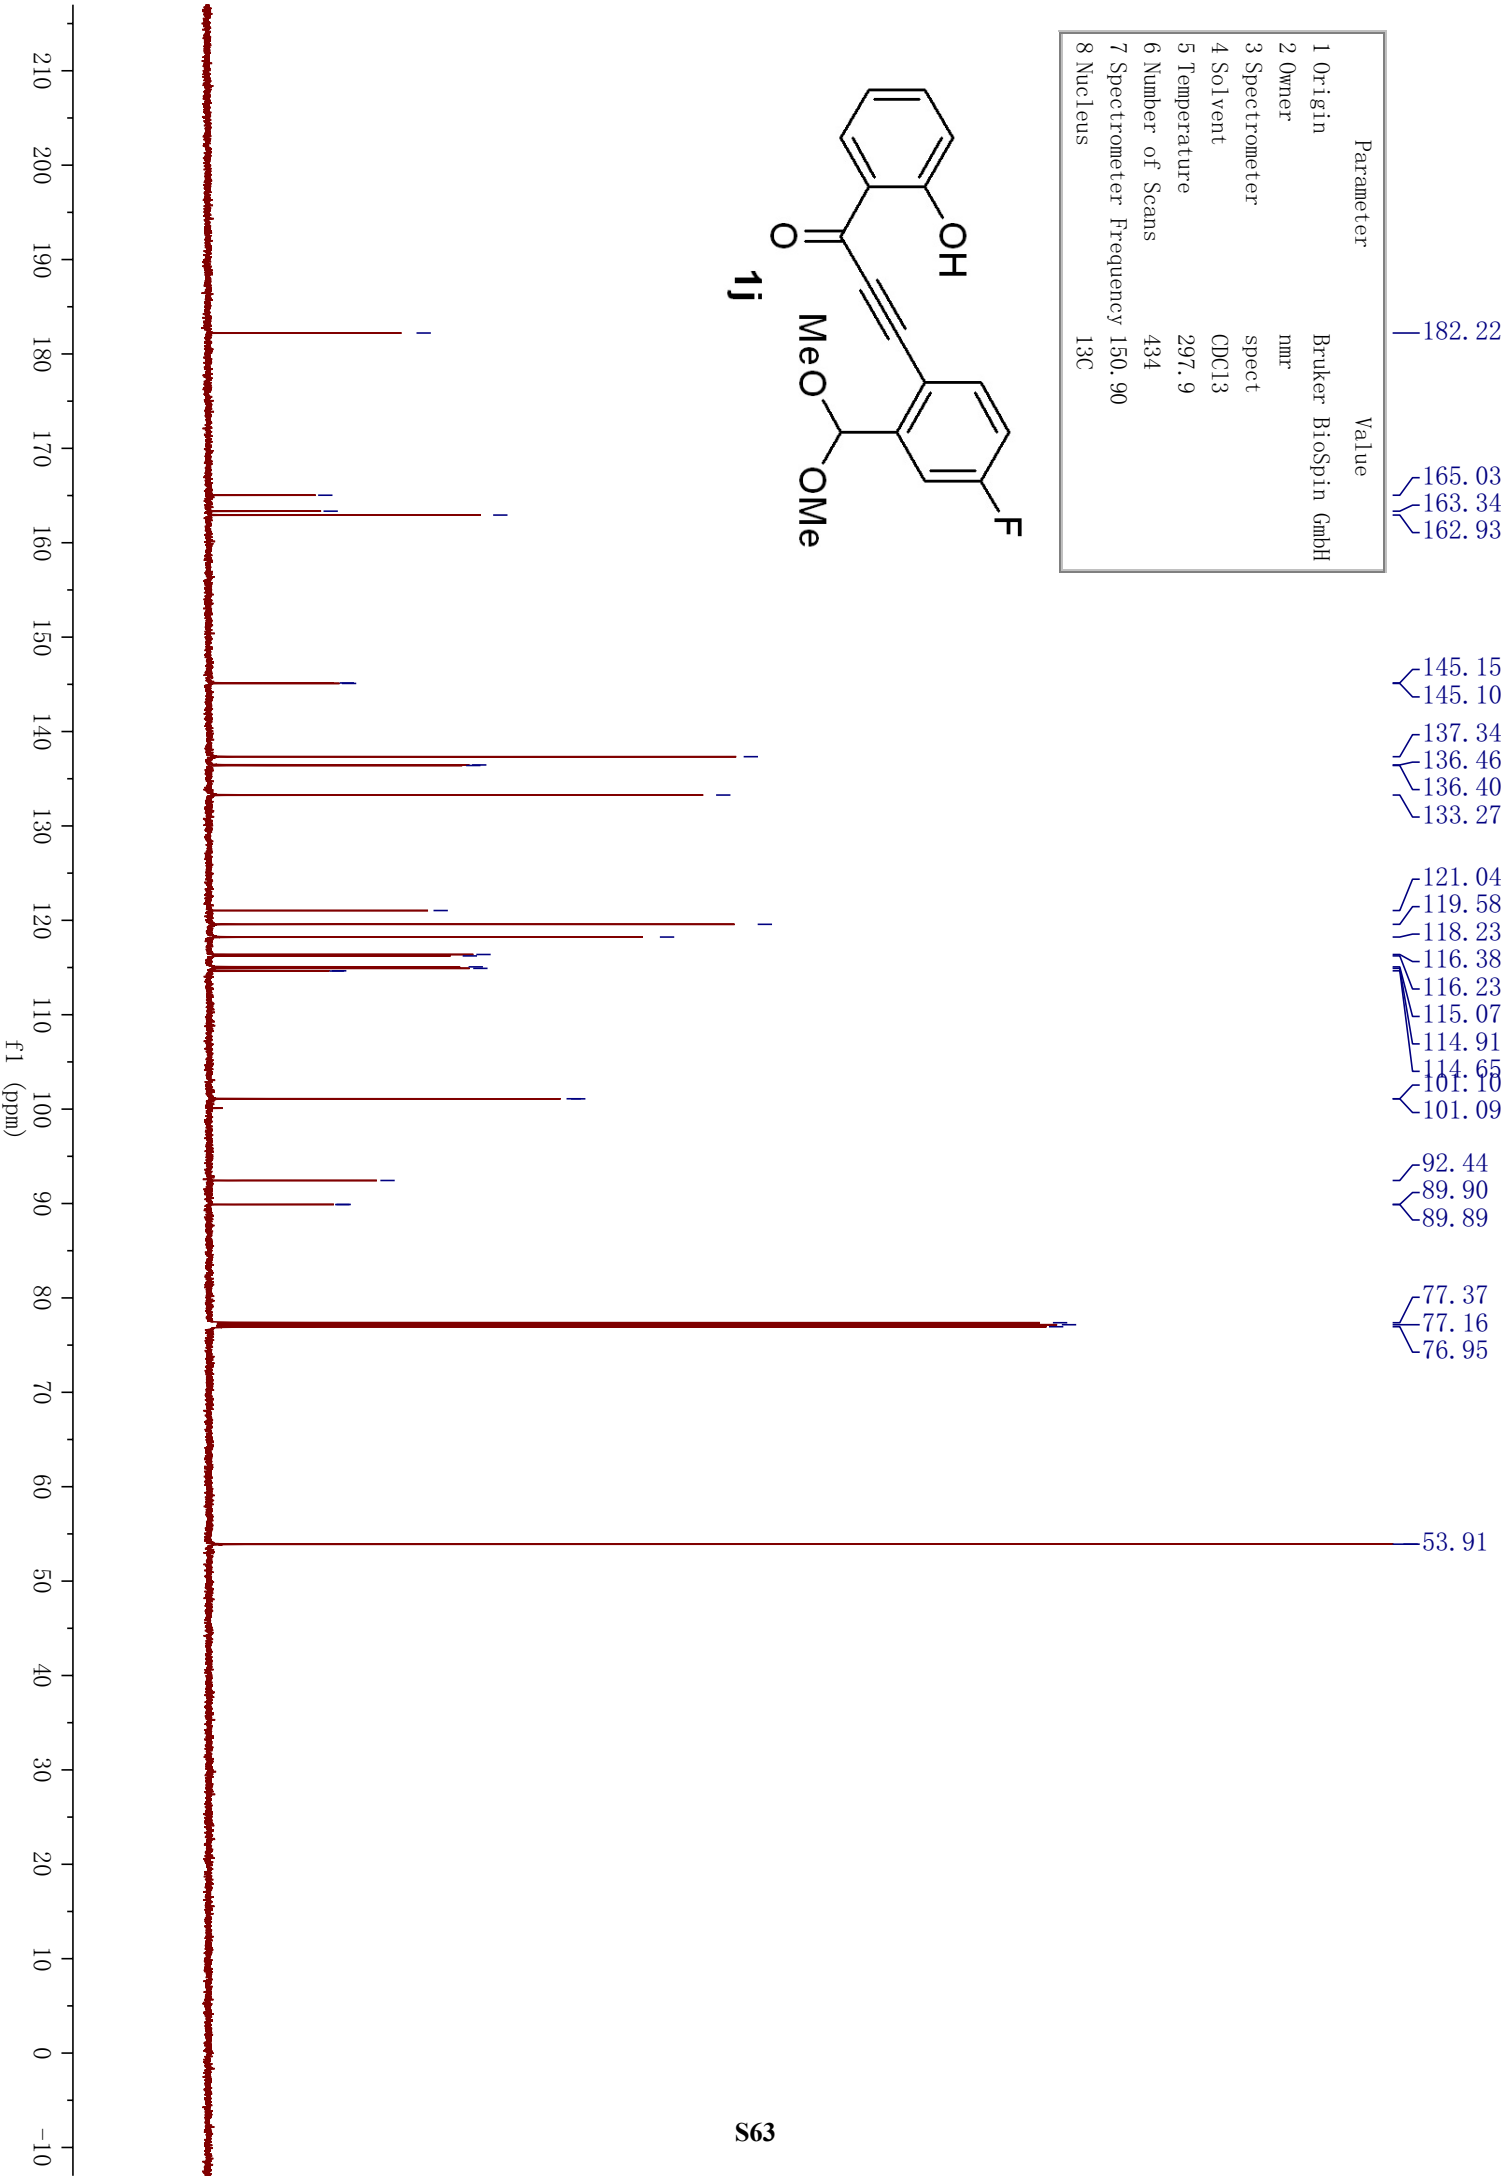

| Parameter                | Value               |
|--------------------------|---------------------|
| 1 Origin                 | Bruker Biospin GmbH |
| 2 Owner                  | nmr                 |
| 3 Spectrometer           | spect               |
| 4 Solvent                | CDCl3               |
| 5 Temperature            | 297.9               |
| 6 Number of Scans        | 16                  |
| 7 Spectrometer Frequency | 600.13              |
| 8 Nucleus                | <sup>1</sup> H      |

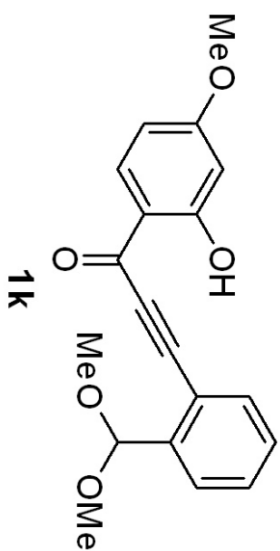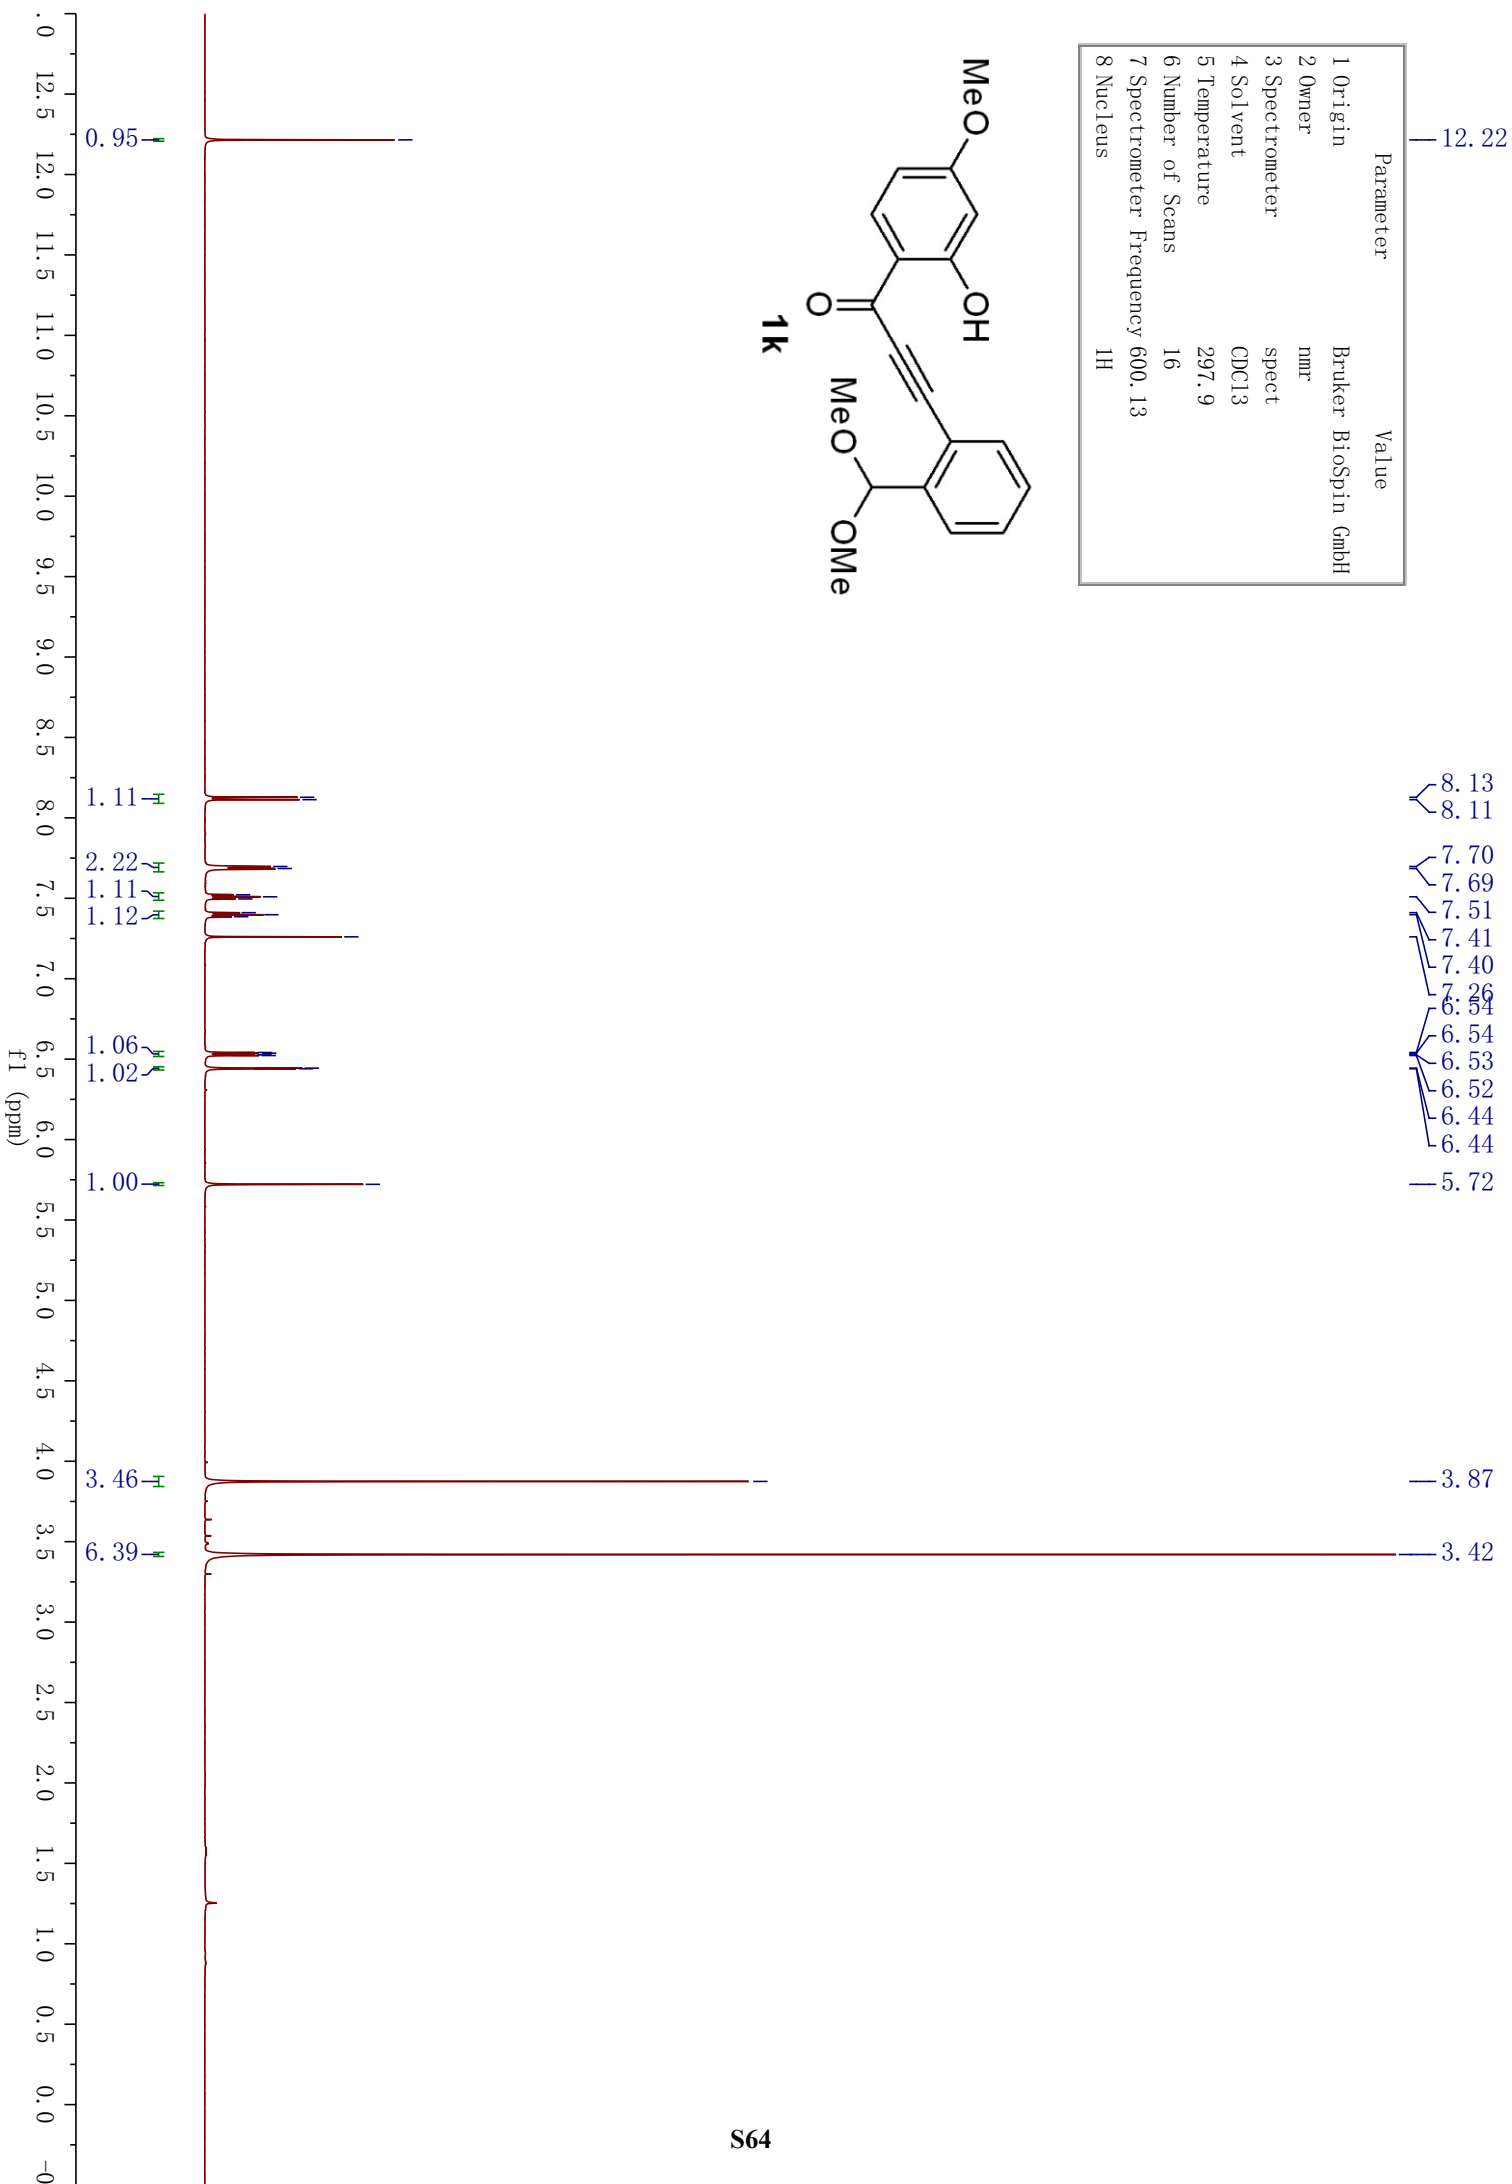

| Parameter                | Value                |
|--------------------------|----------------------|
| 1 Origin                 | Brucker BioSpin GmbH |
| 2 Owner                  | nmr                  |
| 3 Spectrometer           | spect                |
| 4 Solvent                | CDCl3                |
| 5 Temperature            | 297.9                |
| 6 Number of Scans        | 952                  |
| 7 Spectrometer Frequency | 150.90               |
| 8 Nucleus                | <sup>13</sup> C      |

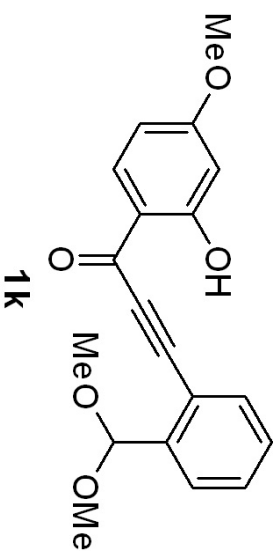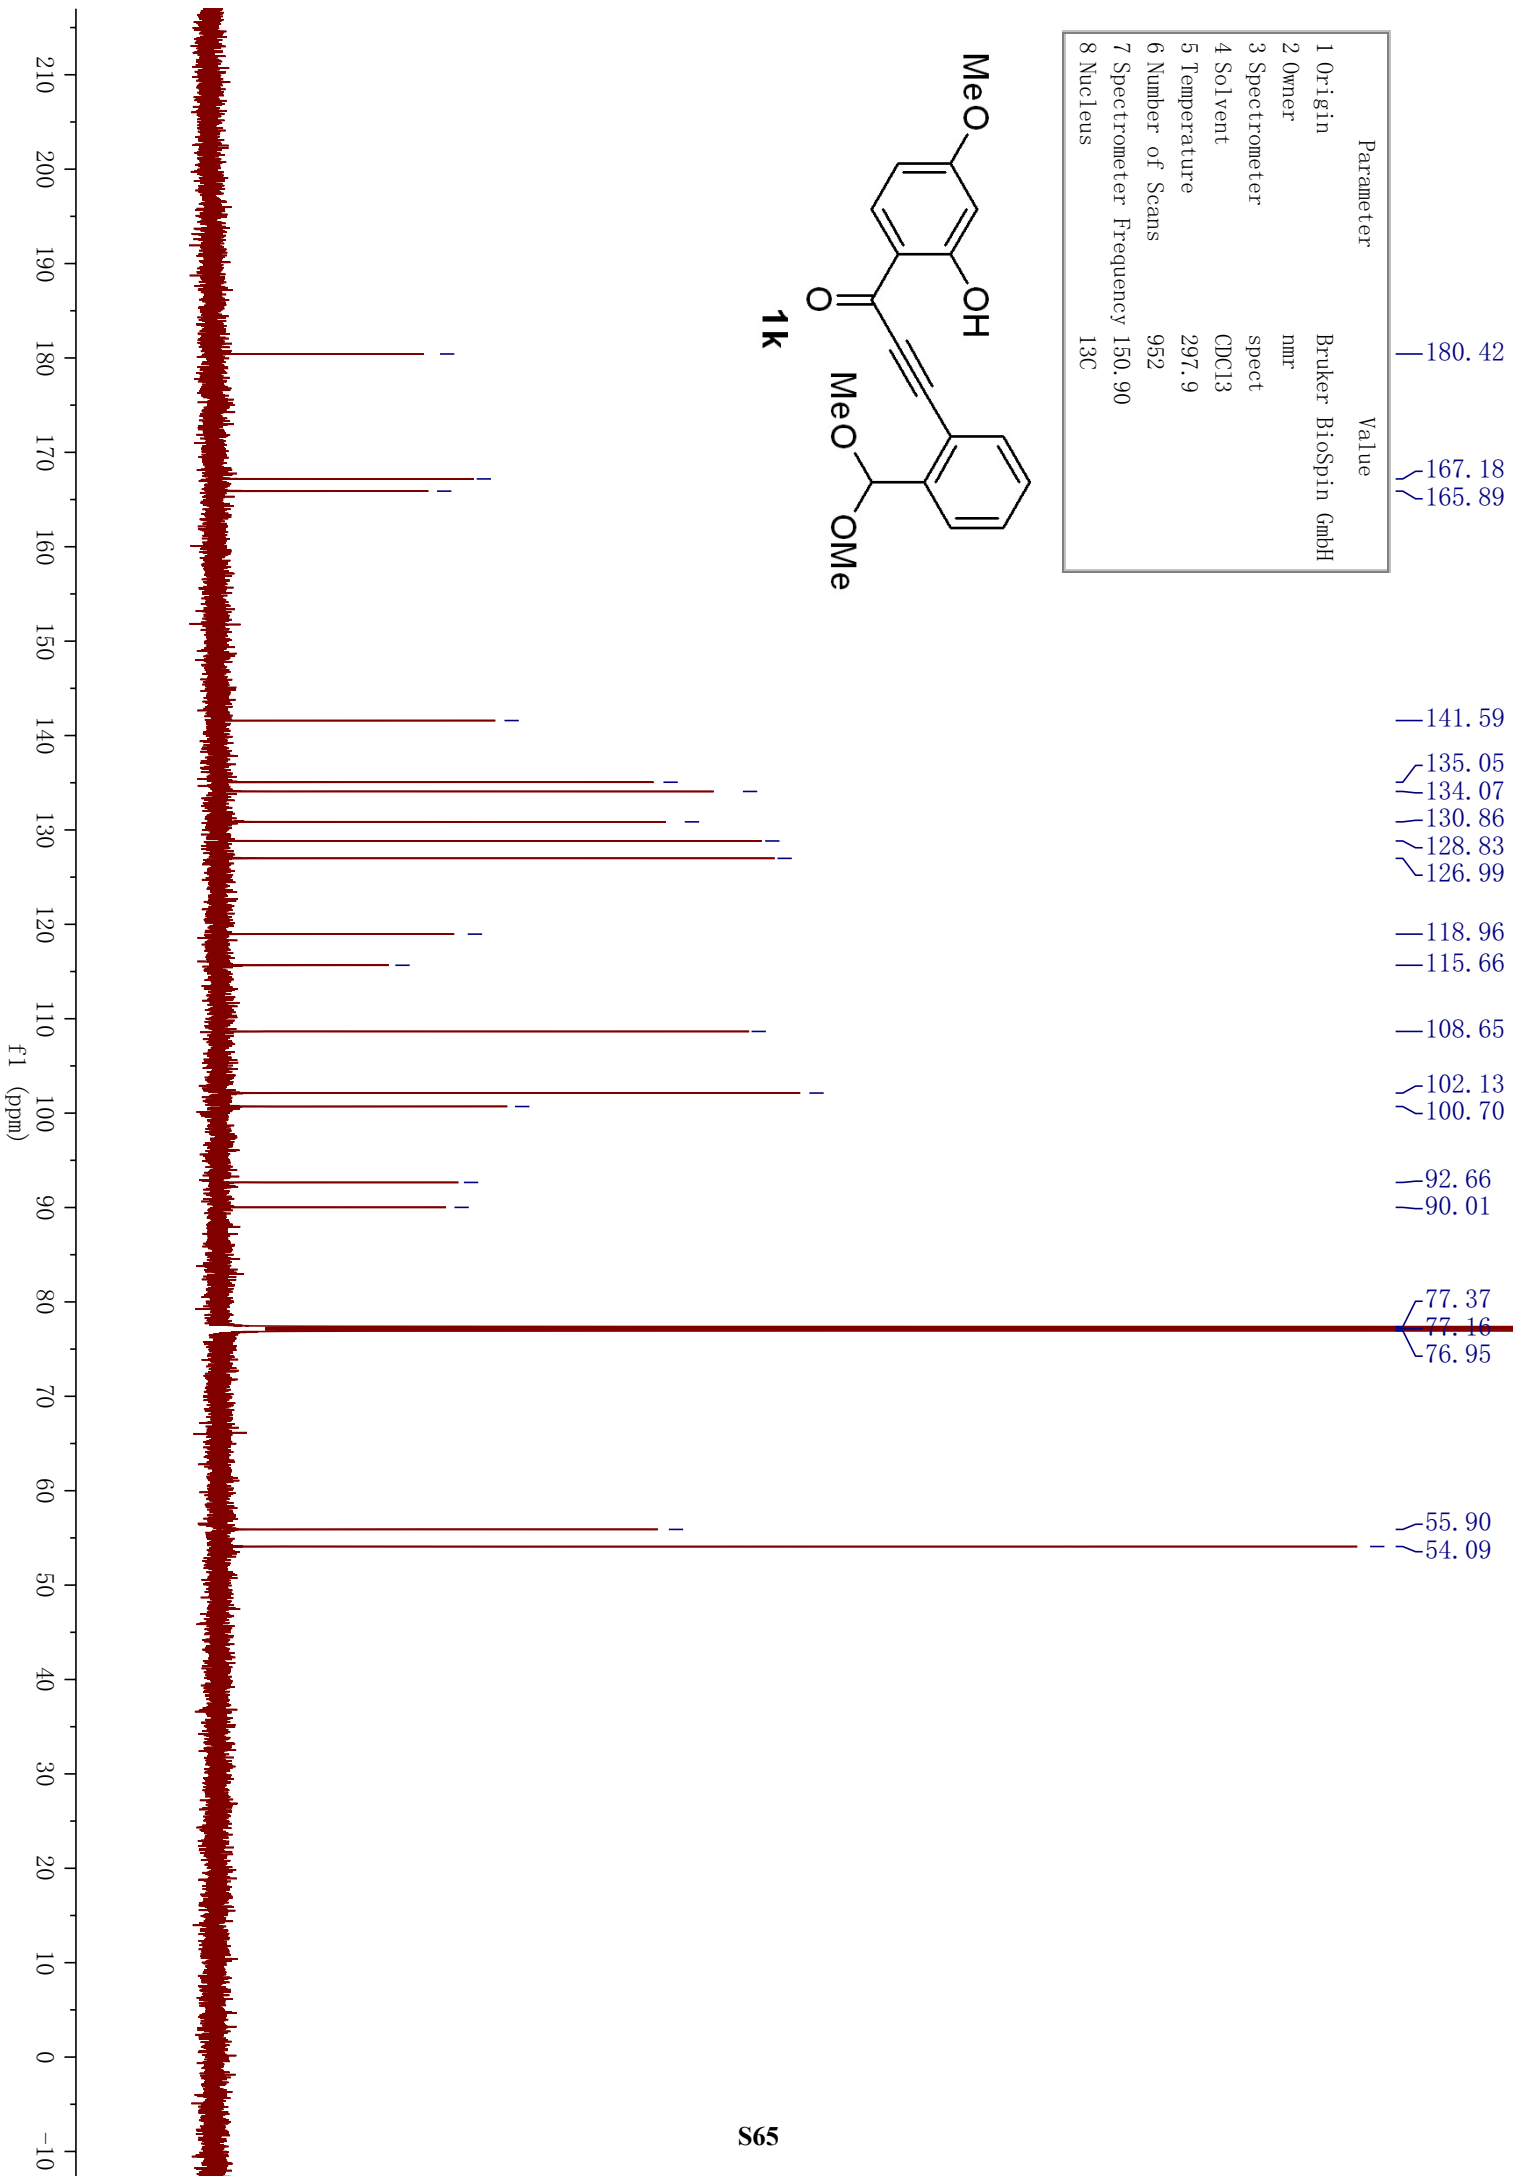

| Parameter                | Value                |
|--------------------------|----------------------|
| 1 Origin                 | Brucker Biospin GmbH |
| 2 Owner                  | nmr                  |
| 3 Spectrometer           | spect                |
| 4 Solvent                | CDCl3                |
| 5 Temperature            | 297.9                |
| 6 Number of Scans        | 16                   |
| 7 Spectrometer Frequency | 600.13               |
| 8 Nucleus                | <sup>1</sup> H       |

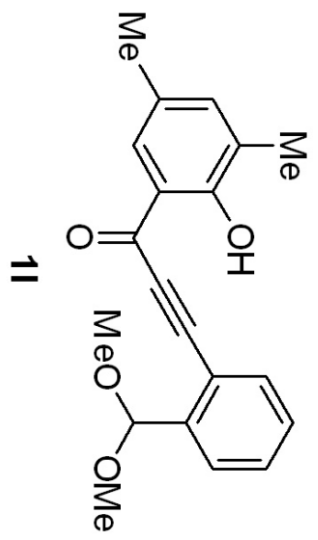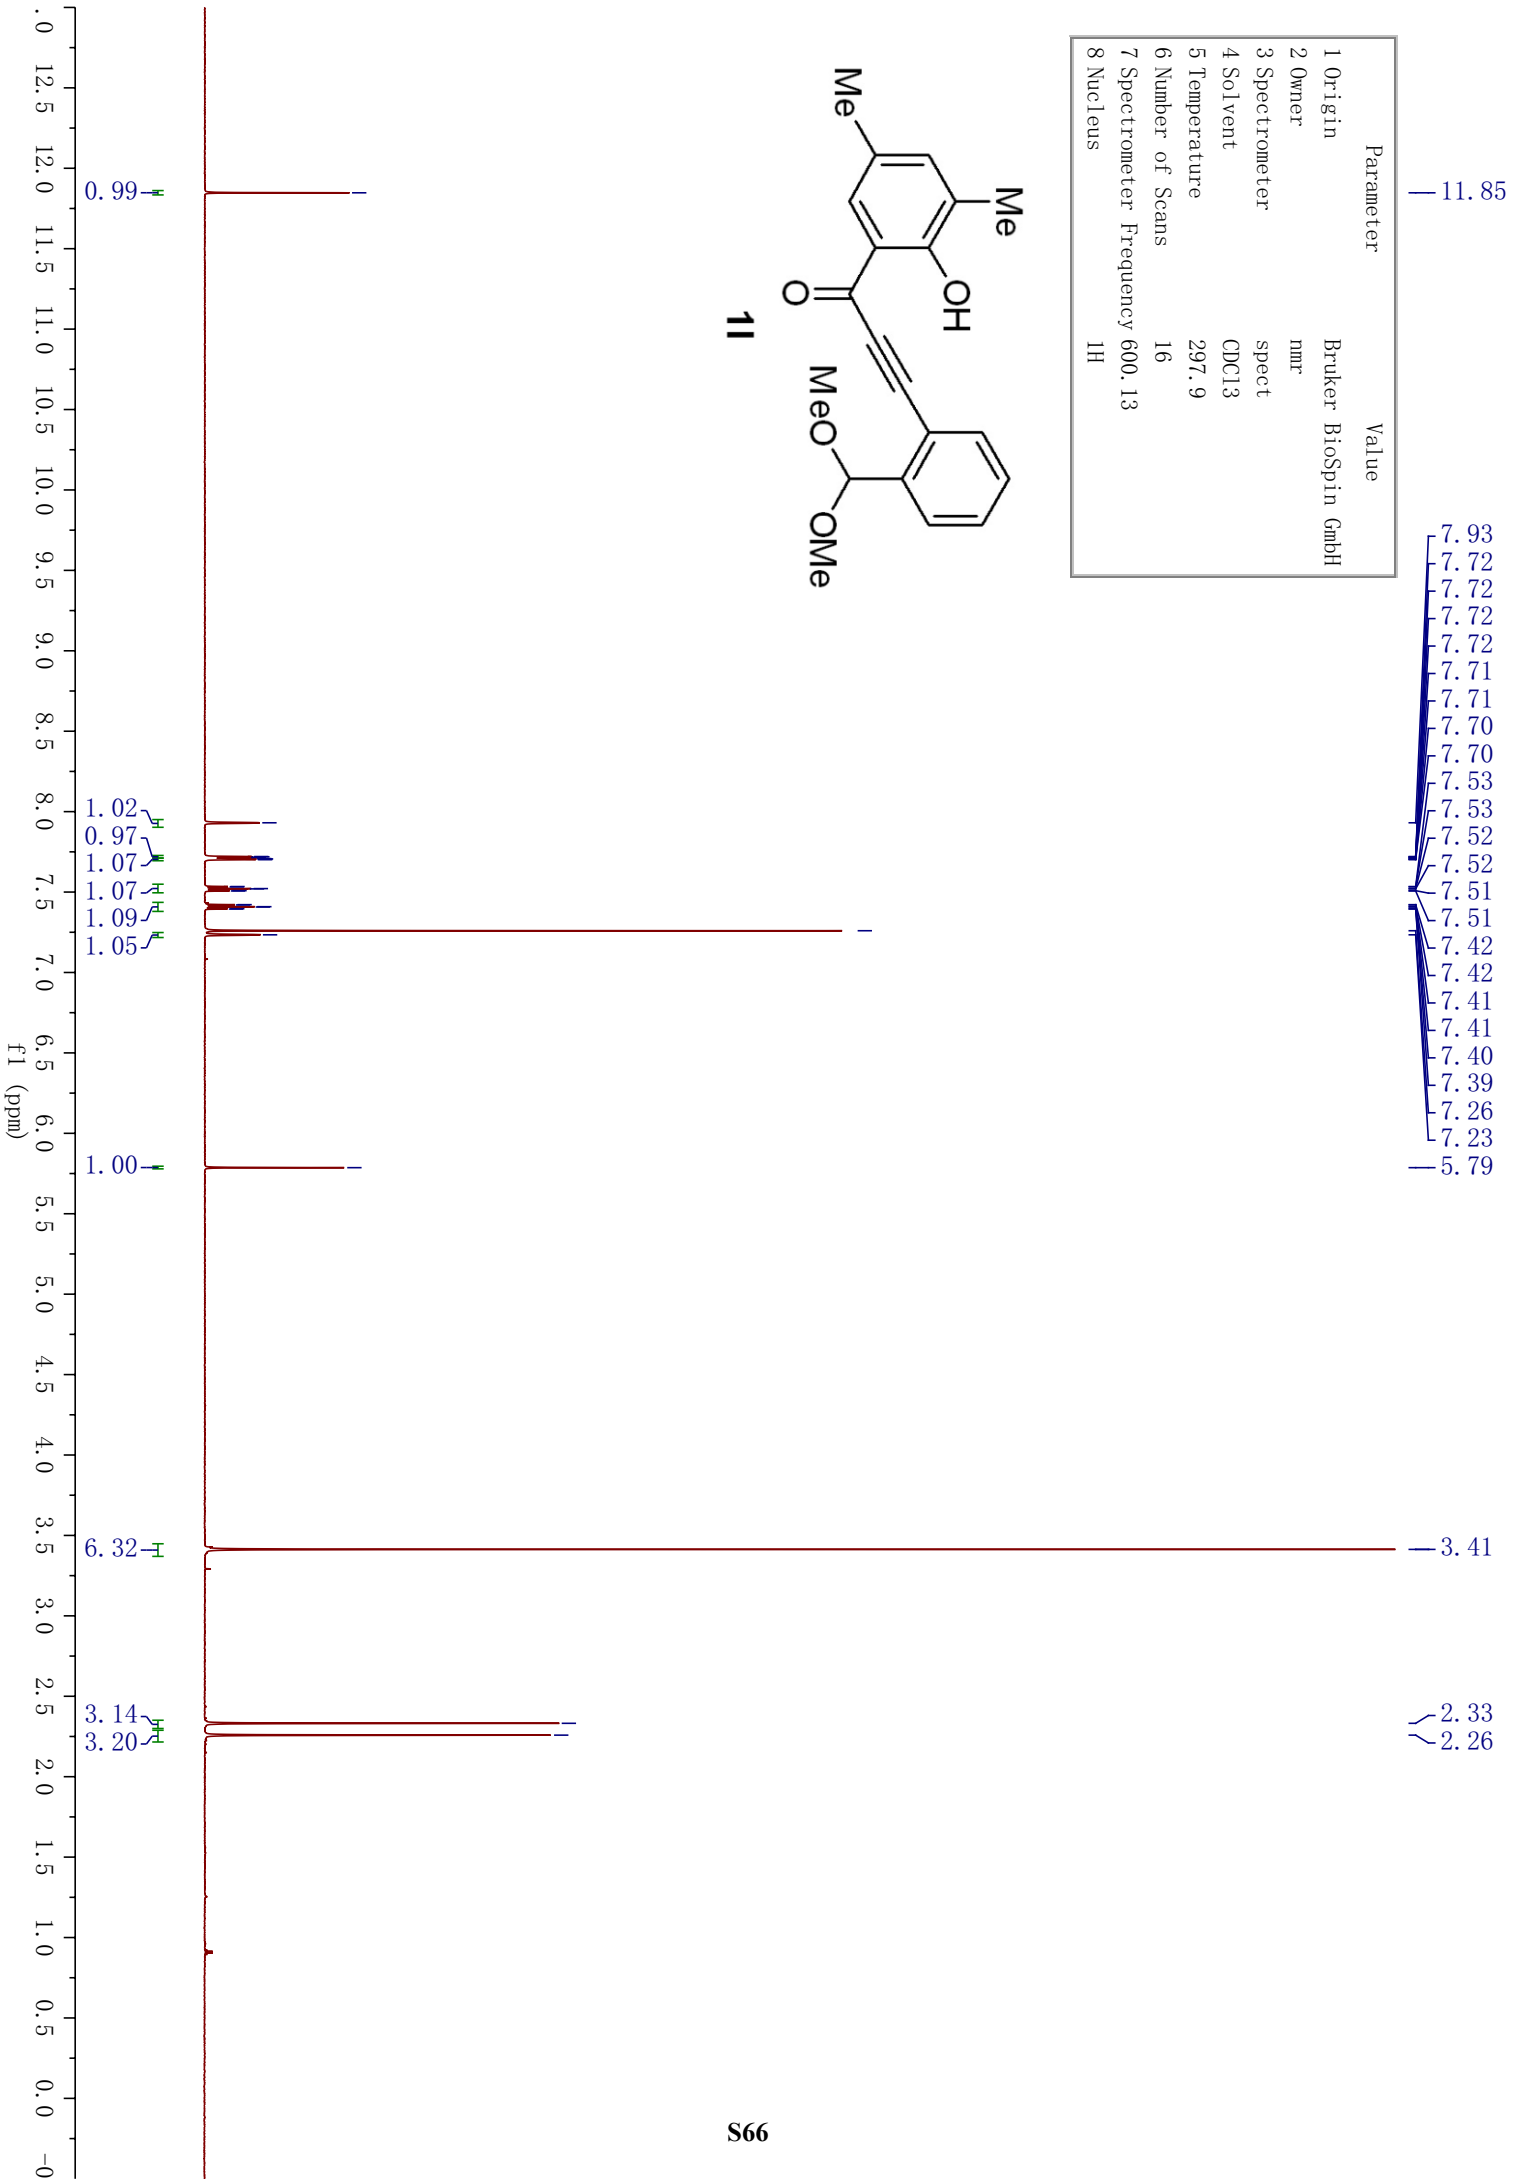

| Parameter                | Value                |
|--------------------------|----------------------|
| 1 Origin                 | Brucker Biospin GmbH |
| 2 Owner                  | nmr                  |
| 3 Spectrometer           | spect                |
| 4 Solvent                | CDCl3                |
| 5 Temperature            | 297.9                |
| 6 Number of Scans        | 290                  |
| 7 Spectrometer Frequency | 150.90               |
| 8 Nucleus                | <sup>13</sup> C      |

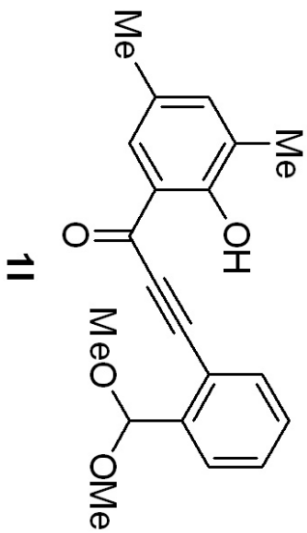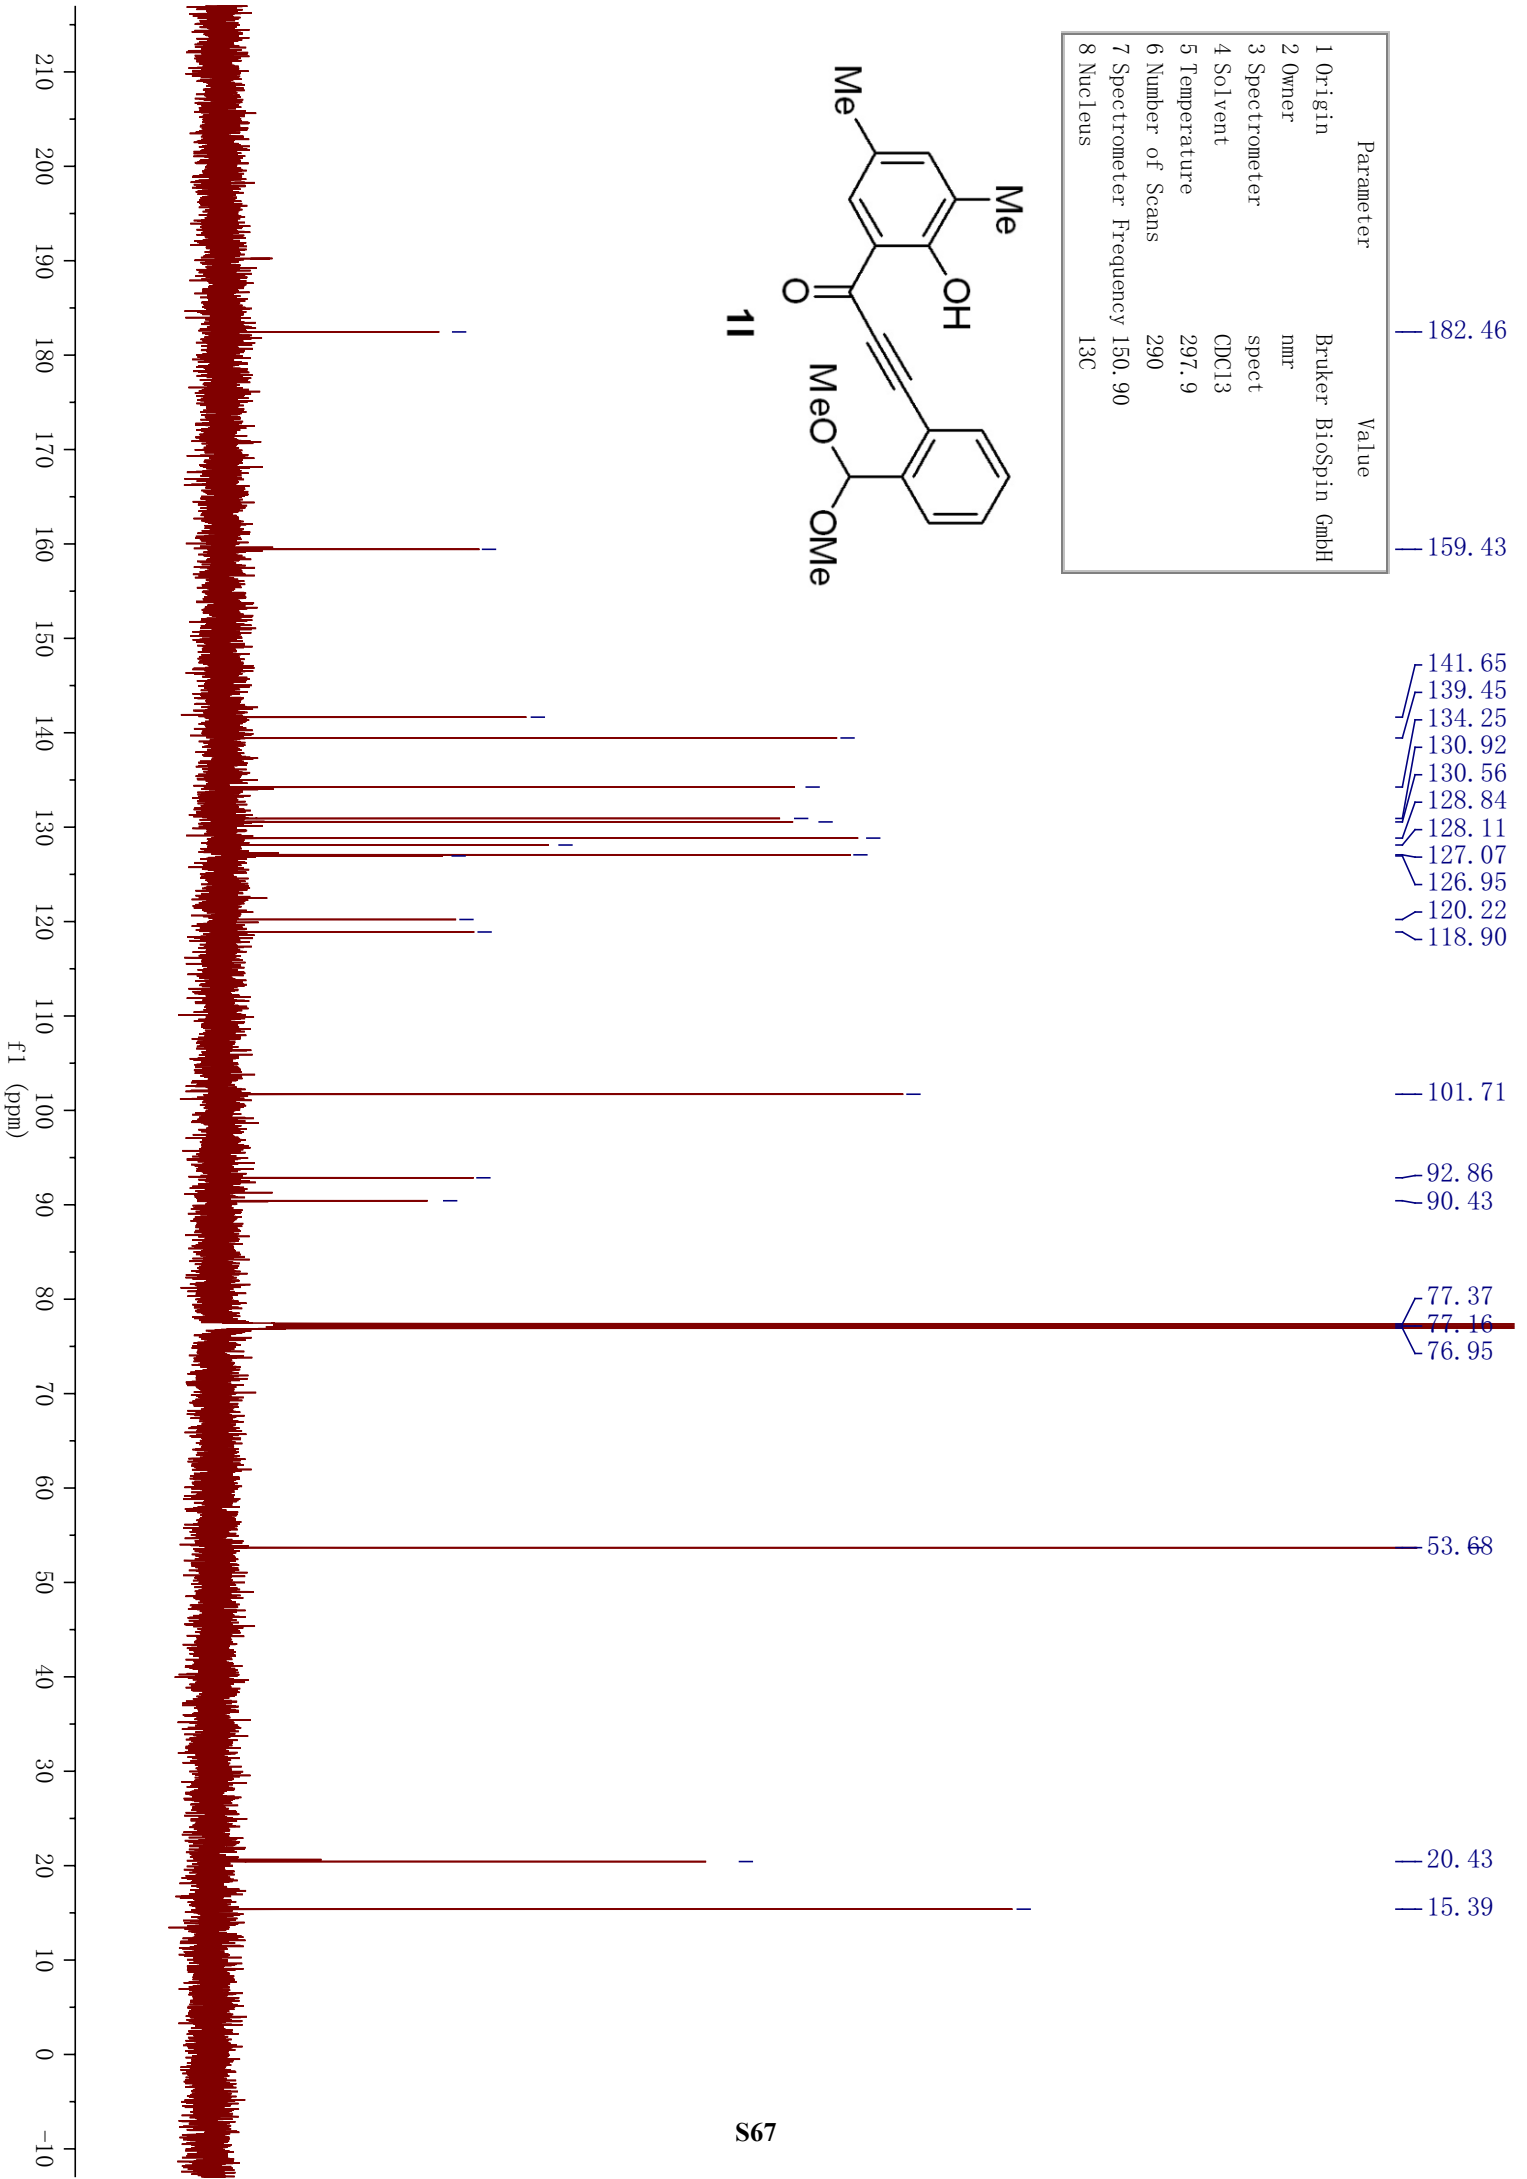



| Parameter                | Value               |
|--------------------------|---------------------|
| 1 Origin                 | Bruker Biospin GmbH |
| 2 Owner                  | nmr                 |
| 3 Spectrometer           | spect               |
| 4 Solvent                | CDCl3               |
| 5 Temperature            | 298.0               |
| 6 Number of Scans        | 3369                |
| 7 Spectrometer Frequency | 150.90              |
| 8 Nucleus                | <sup>13</sup> C     |

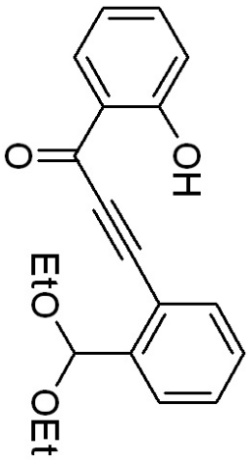

1m

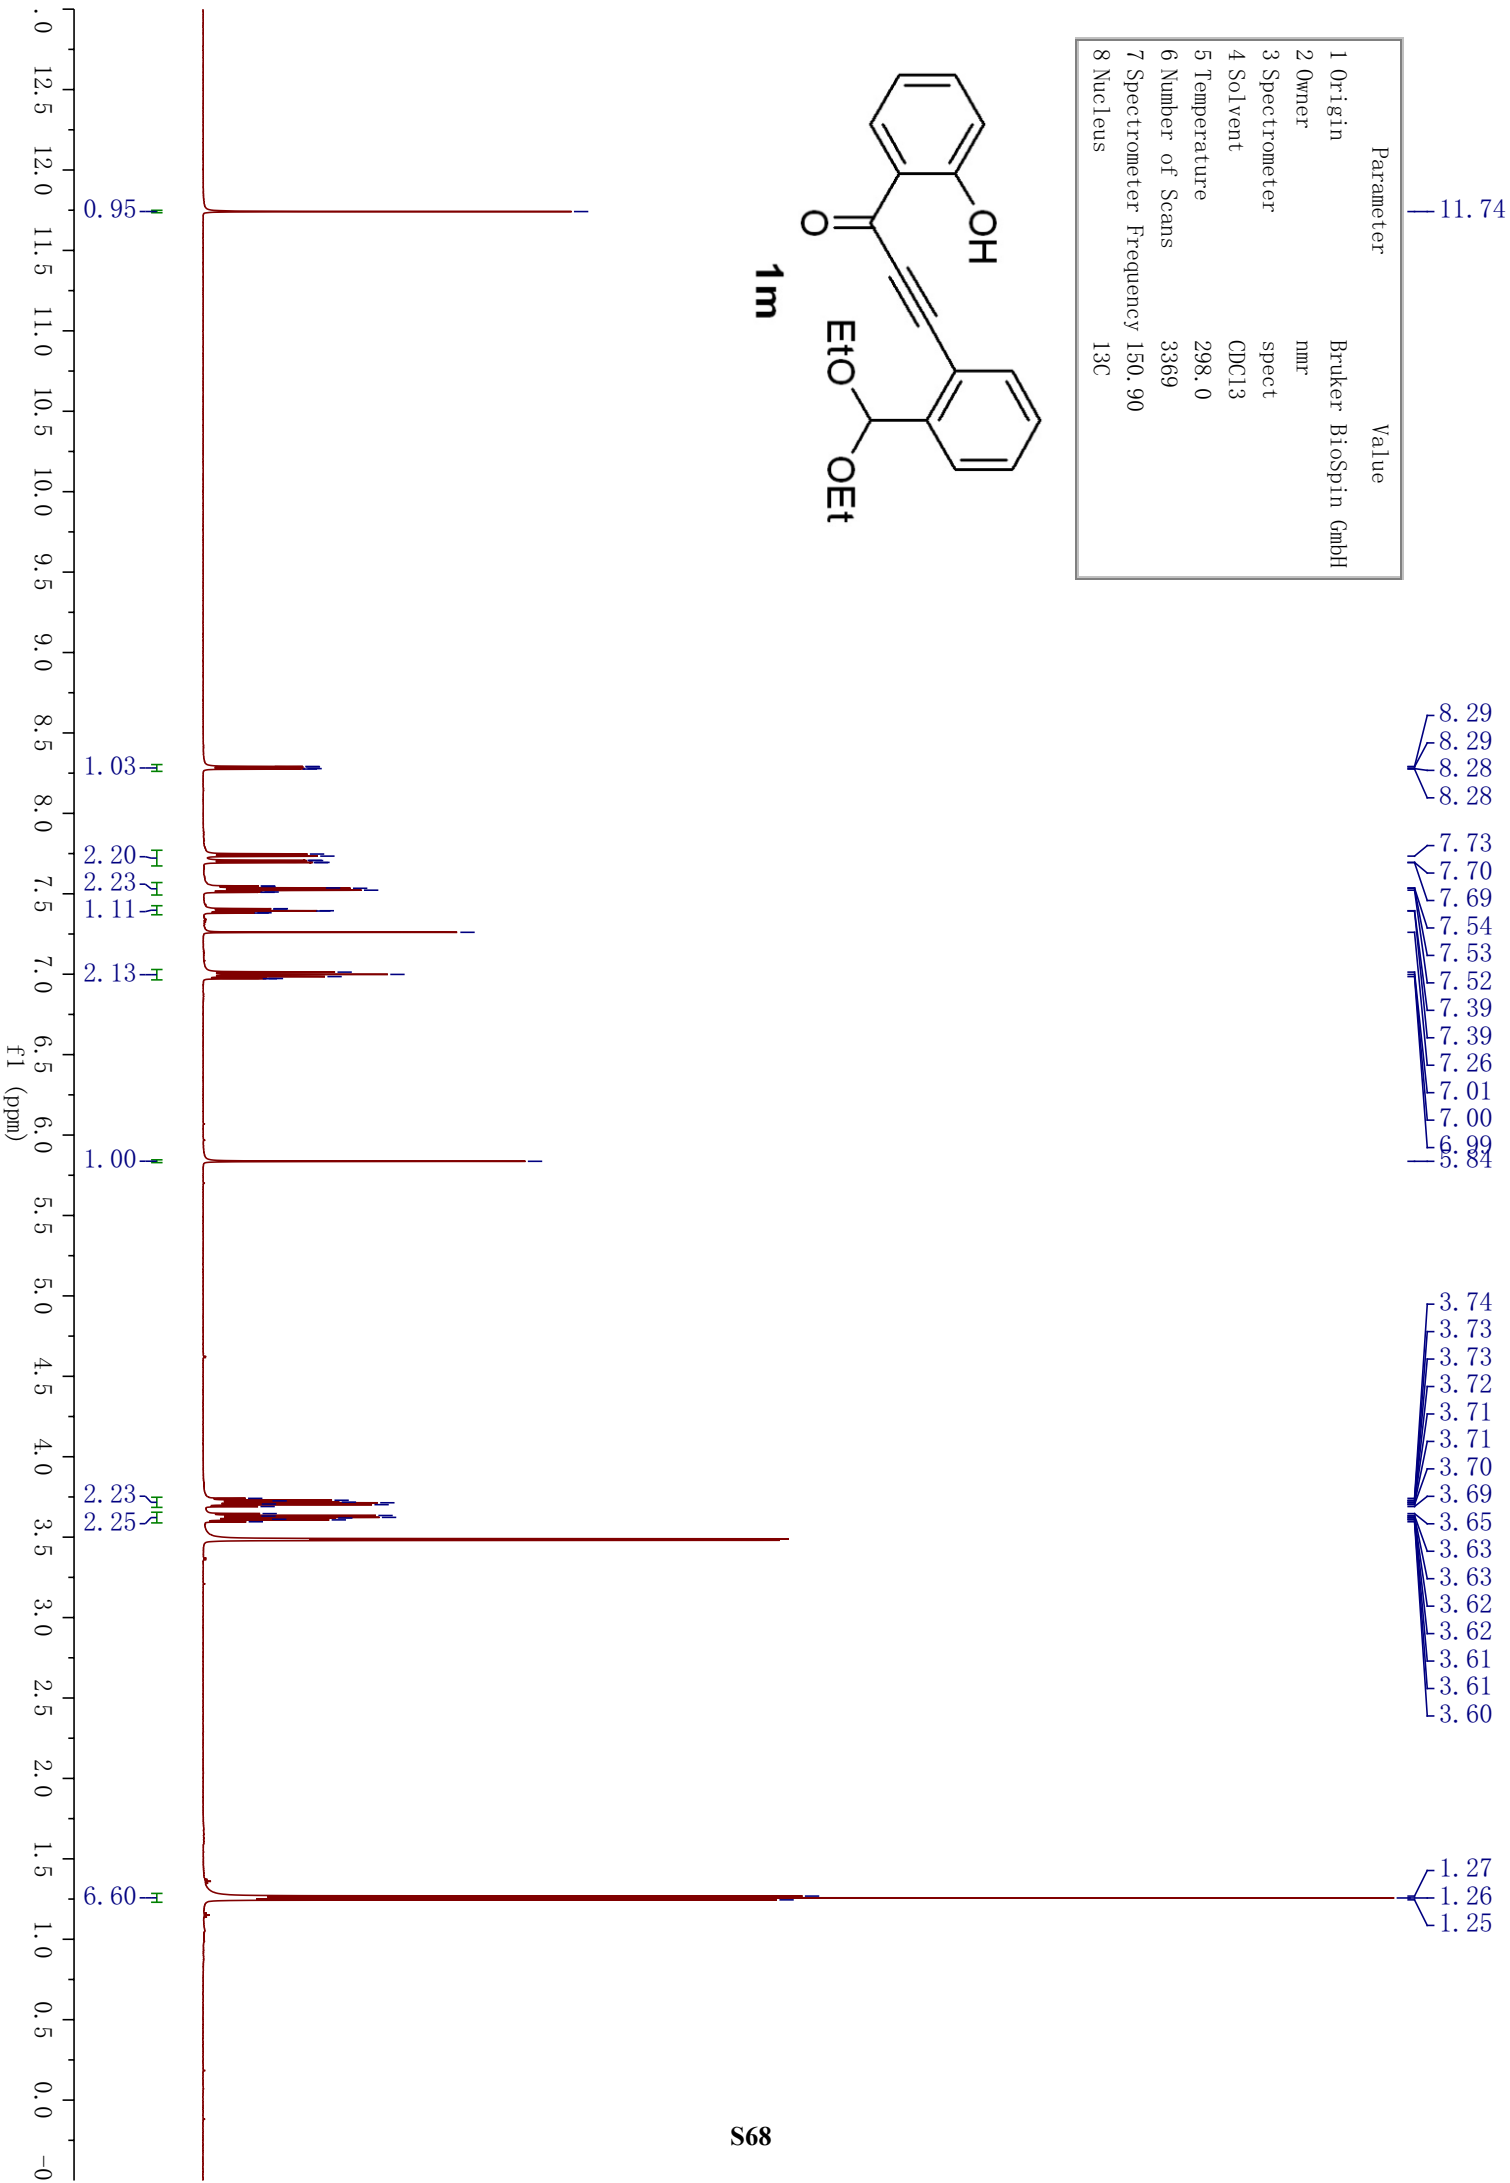

| Parameter                | Value               |
|--------------------------|---------------------|
| 1 Origin                 | Bruker Biospin GmbH |
| 2 Owner                  | nmr                 |
| 3 Spectrometer           | spect               |
| 4 Solvent                | CDCl3               |
| 5 Temperature            | 297.9               |
| 6 Number of Scans        | 2204                |
| 7 Spectrometer Frequency | 150.90              |
| 8 Nucleus                | <sup>13</sup> C     |

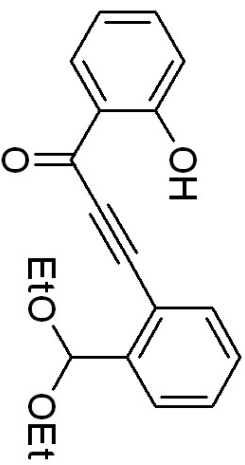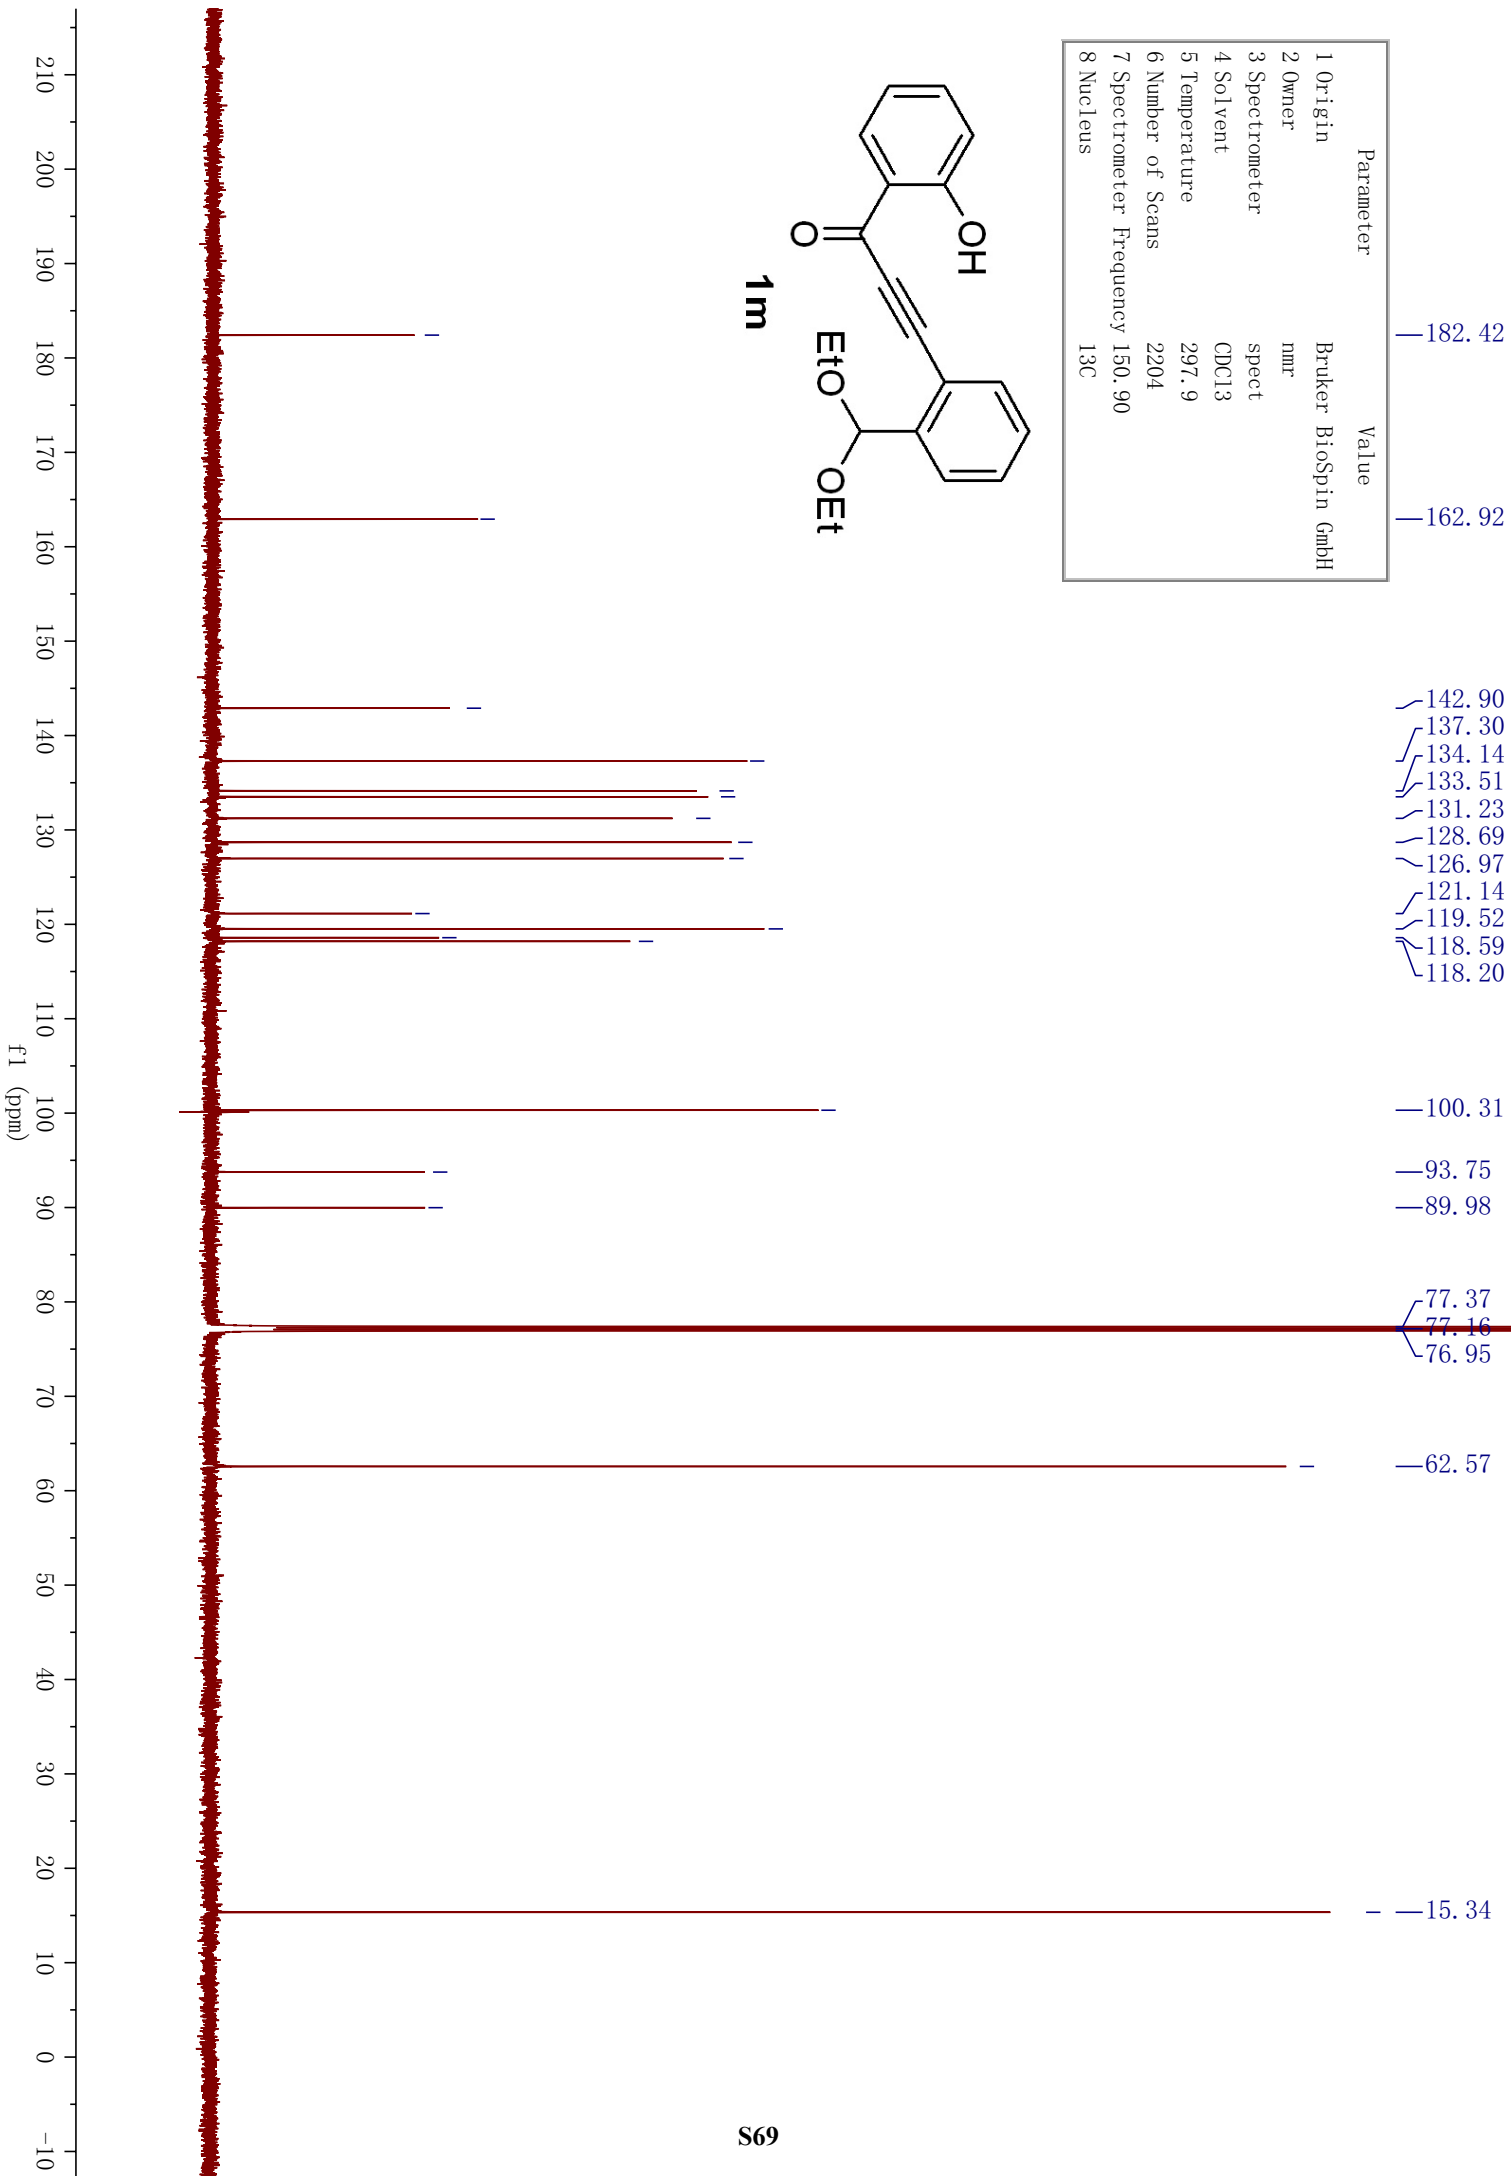

| Parameter                | Value                |
|--------------------------|----------------------|
| 1 Origin                 | Brucker BioSpin GmbH |
| 2 Owner                  | nmr                  |
| 3 Spectrometer           | spect                |
| 4 Solvent                | CDCl3                |
| 5 Temperature            | 297.9                |
| 6 Number of Scans        | 16                   |
| 7 Spectrometer Frequency | 600.13               |
| 8 Nucleus                | 1H                   |

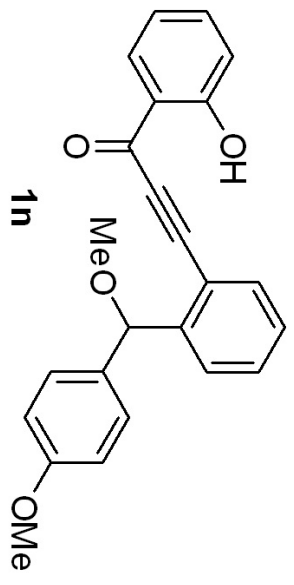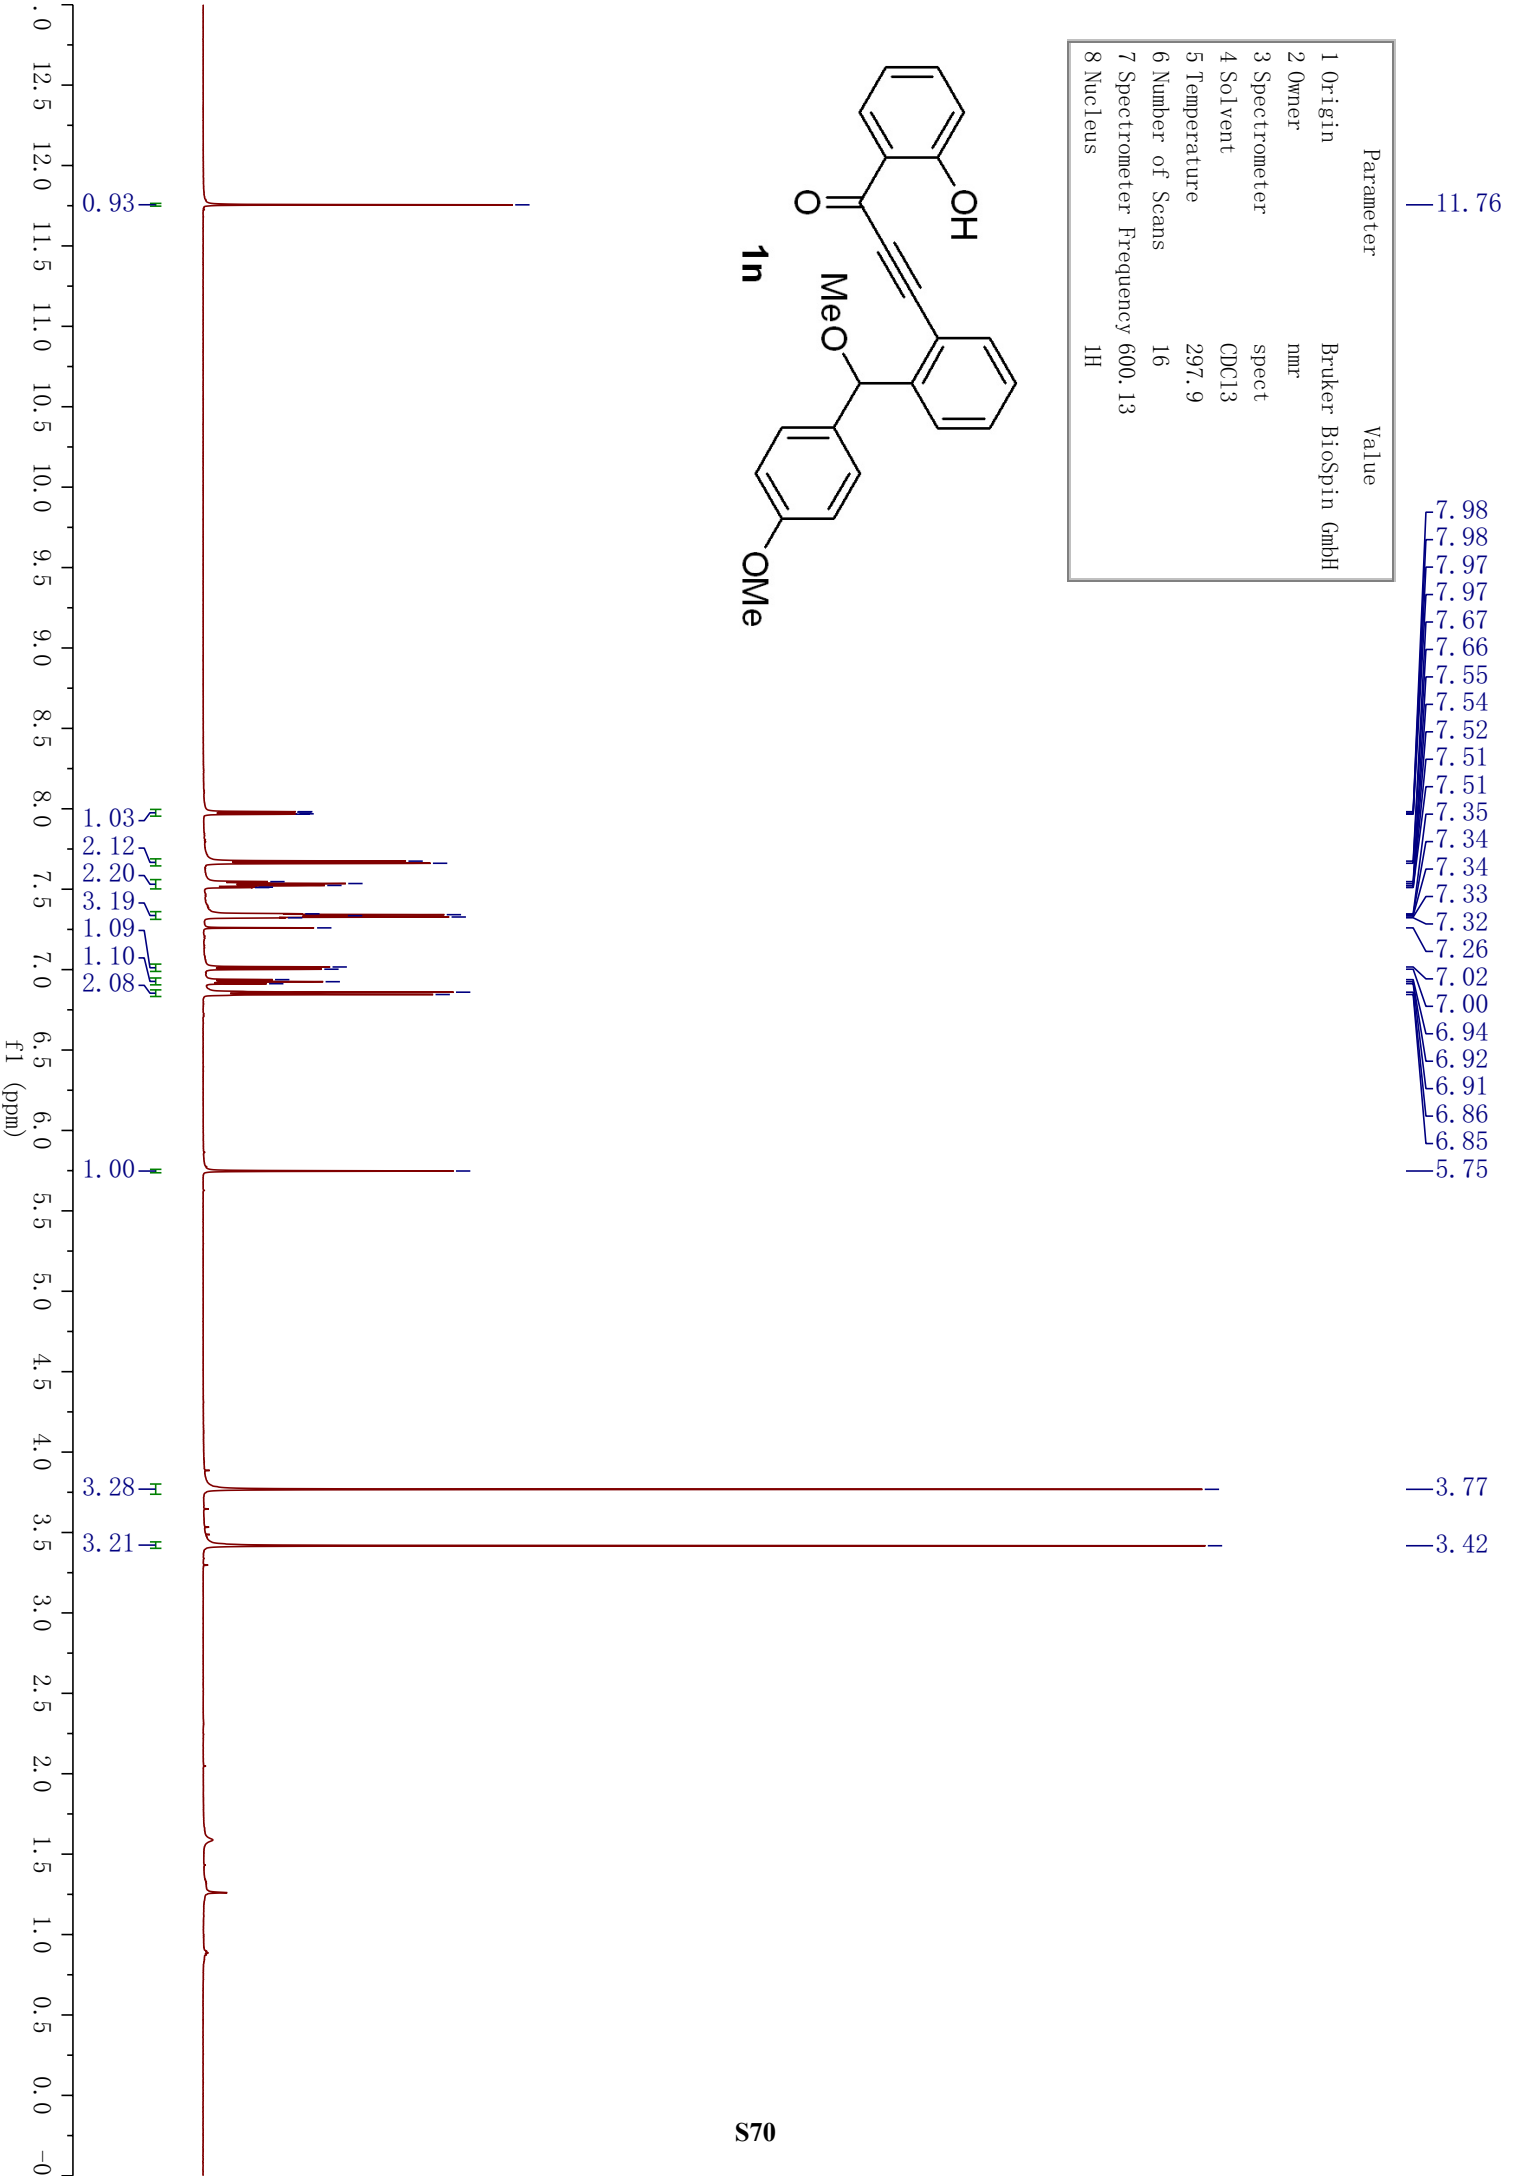

| Parameter                | Value                |
|--------------------------|----------------------|
| 1 Origin                 | Brucker BioSpin GmbH |
| 2 Owner                  | nmr                  |
| 3 Spectrometer           | spect                |
| 4 Solvent                | CDCl3                |
| 5 Temperature            | 297.9                |
| 6 Number of Scans        | 445                  |
| 7 Spectrometer Frequency | 150.90               |
| 8 Nucleus                | <sup>13</sup> C      |

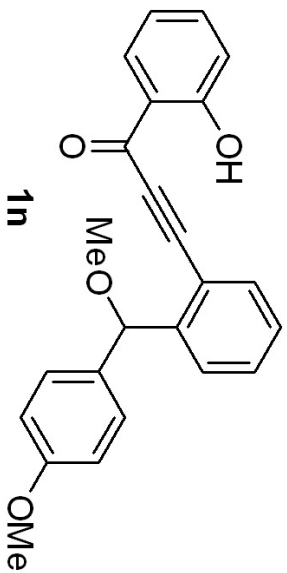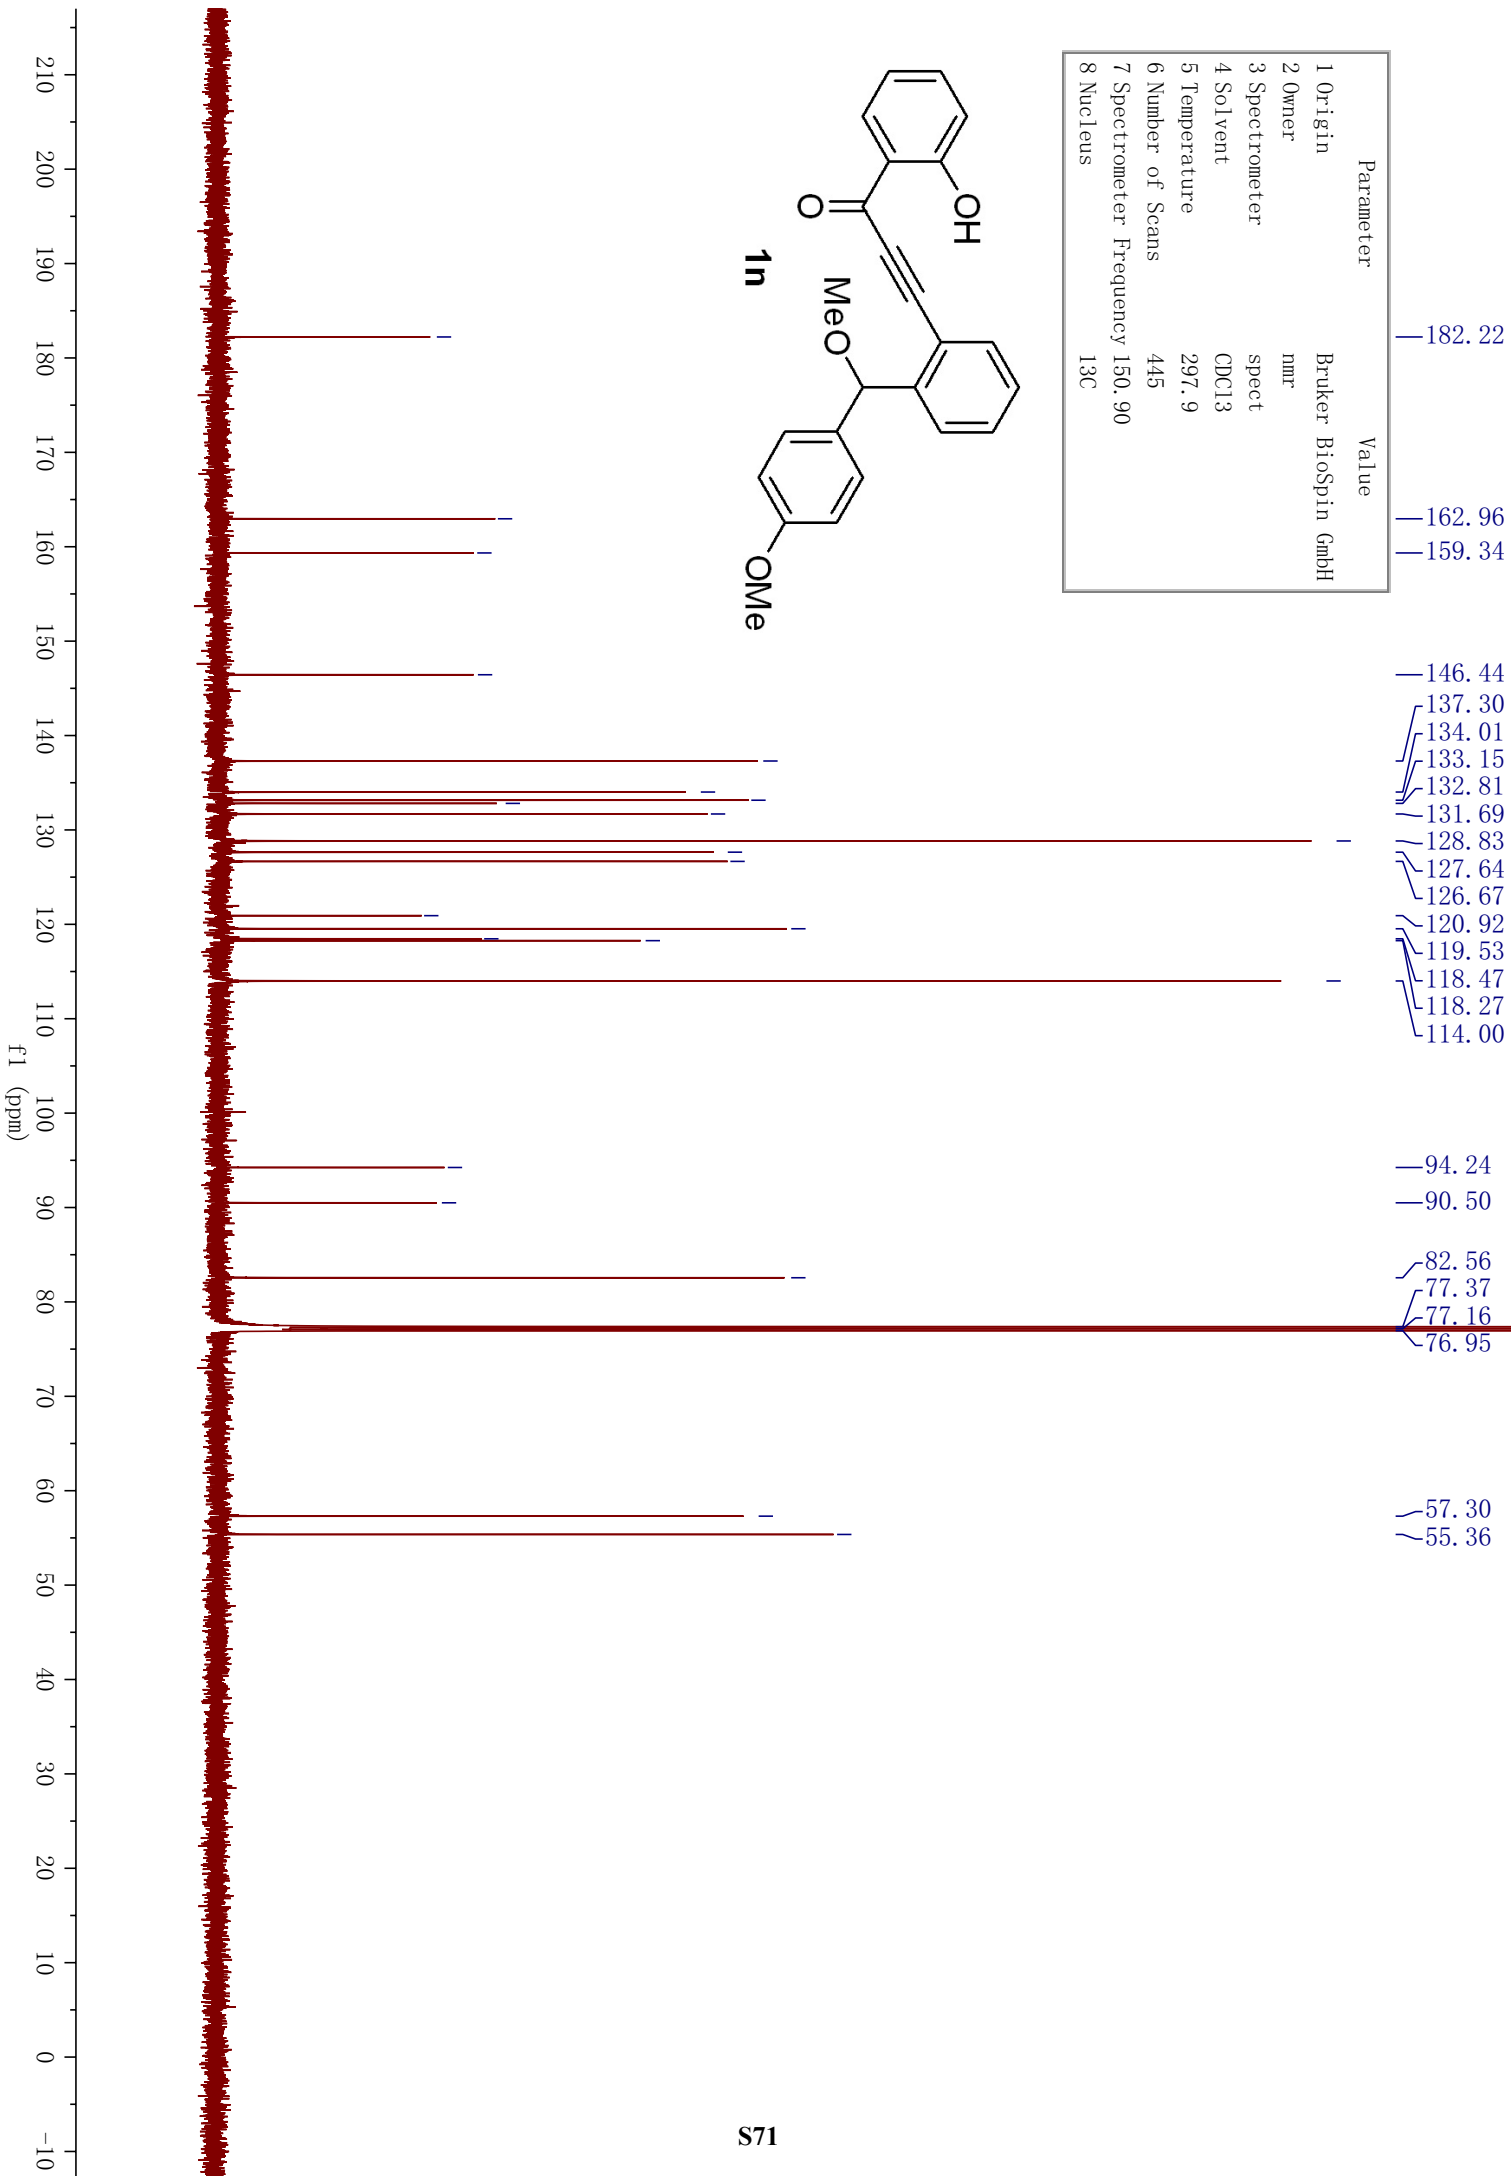

| Parameter                | Value                |
|--------------------------|----------------------|
| 1 Origin                 | Brucker Biospin GmbH |
| 2 Owner                  | nmr                  |
| 3 Spectrometer           | spect                |
| 4 Solvent                | CDCl3                |
| 5 Temperature            | 297.9                |
| 6 Number of Scans        | 16                   |
| 7 Spectrometer Frequency | 600.13               |
| 8 Nucleus                | <sup>1</sup> H       |

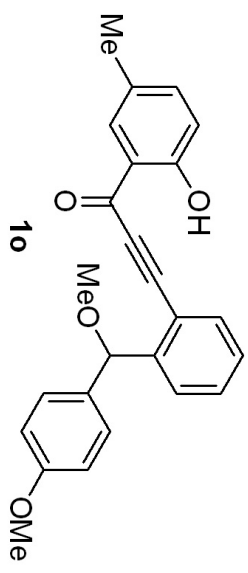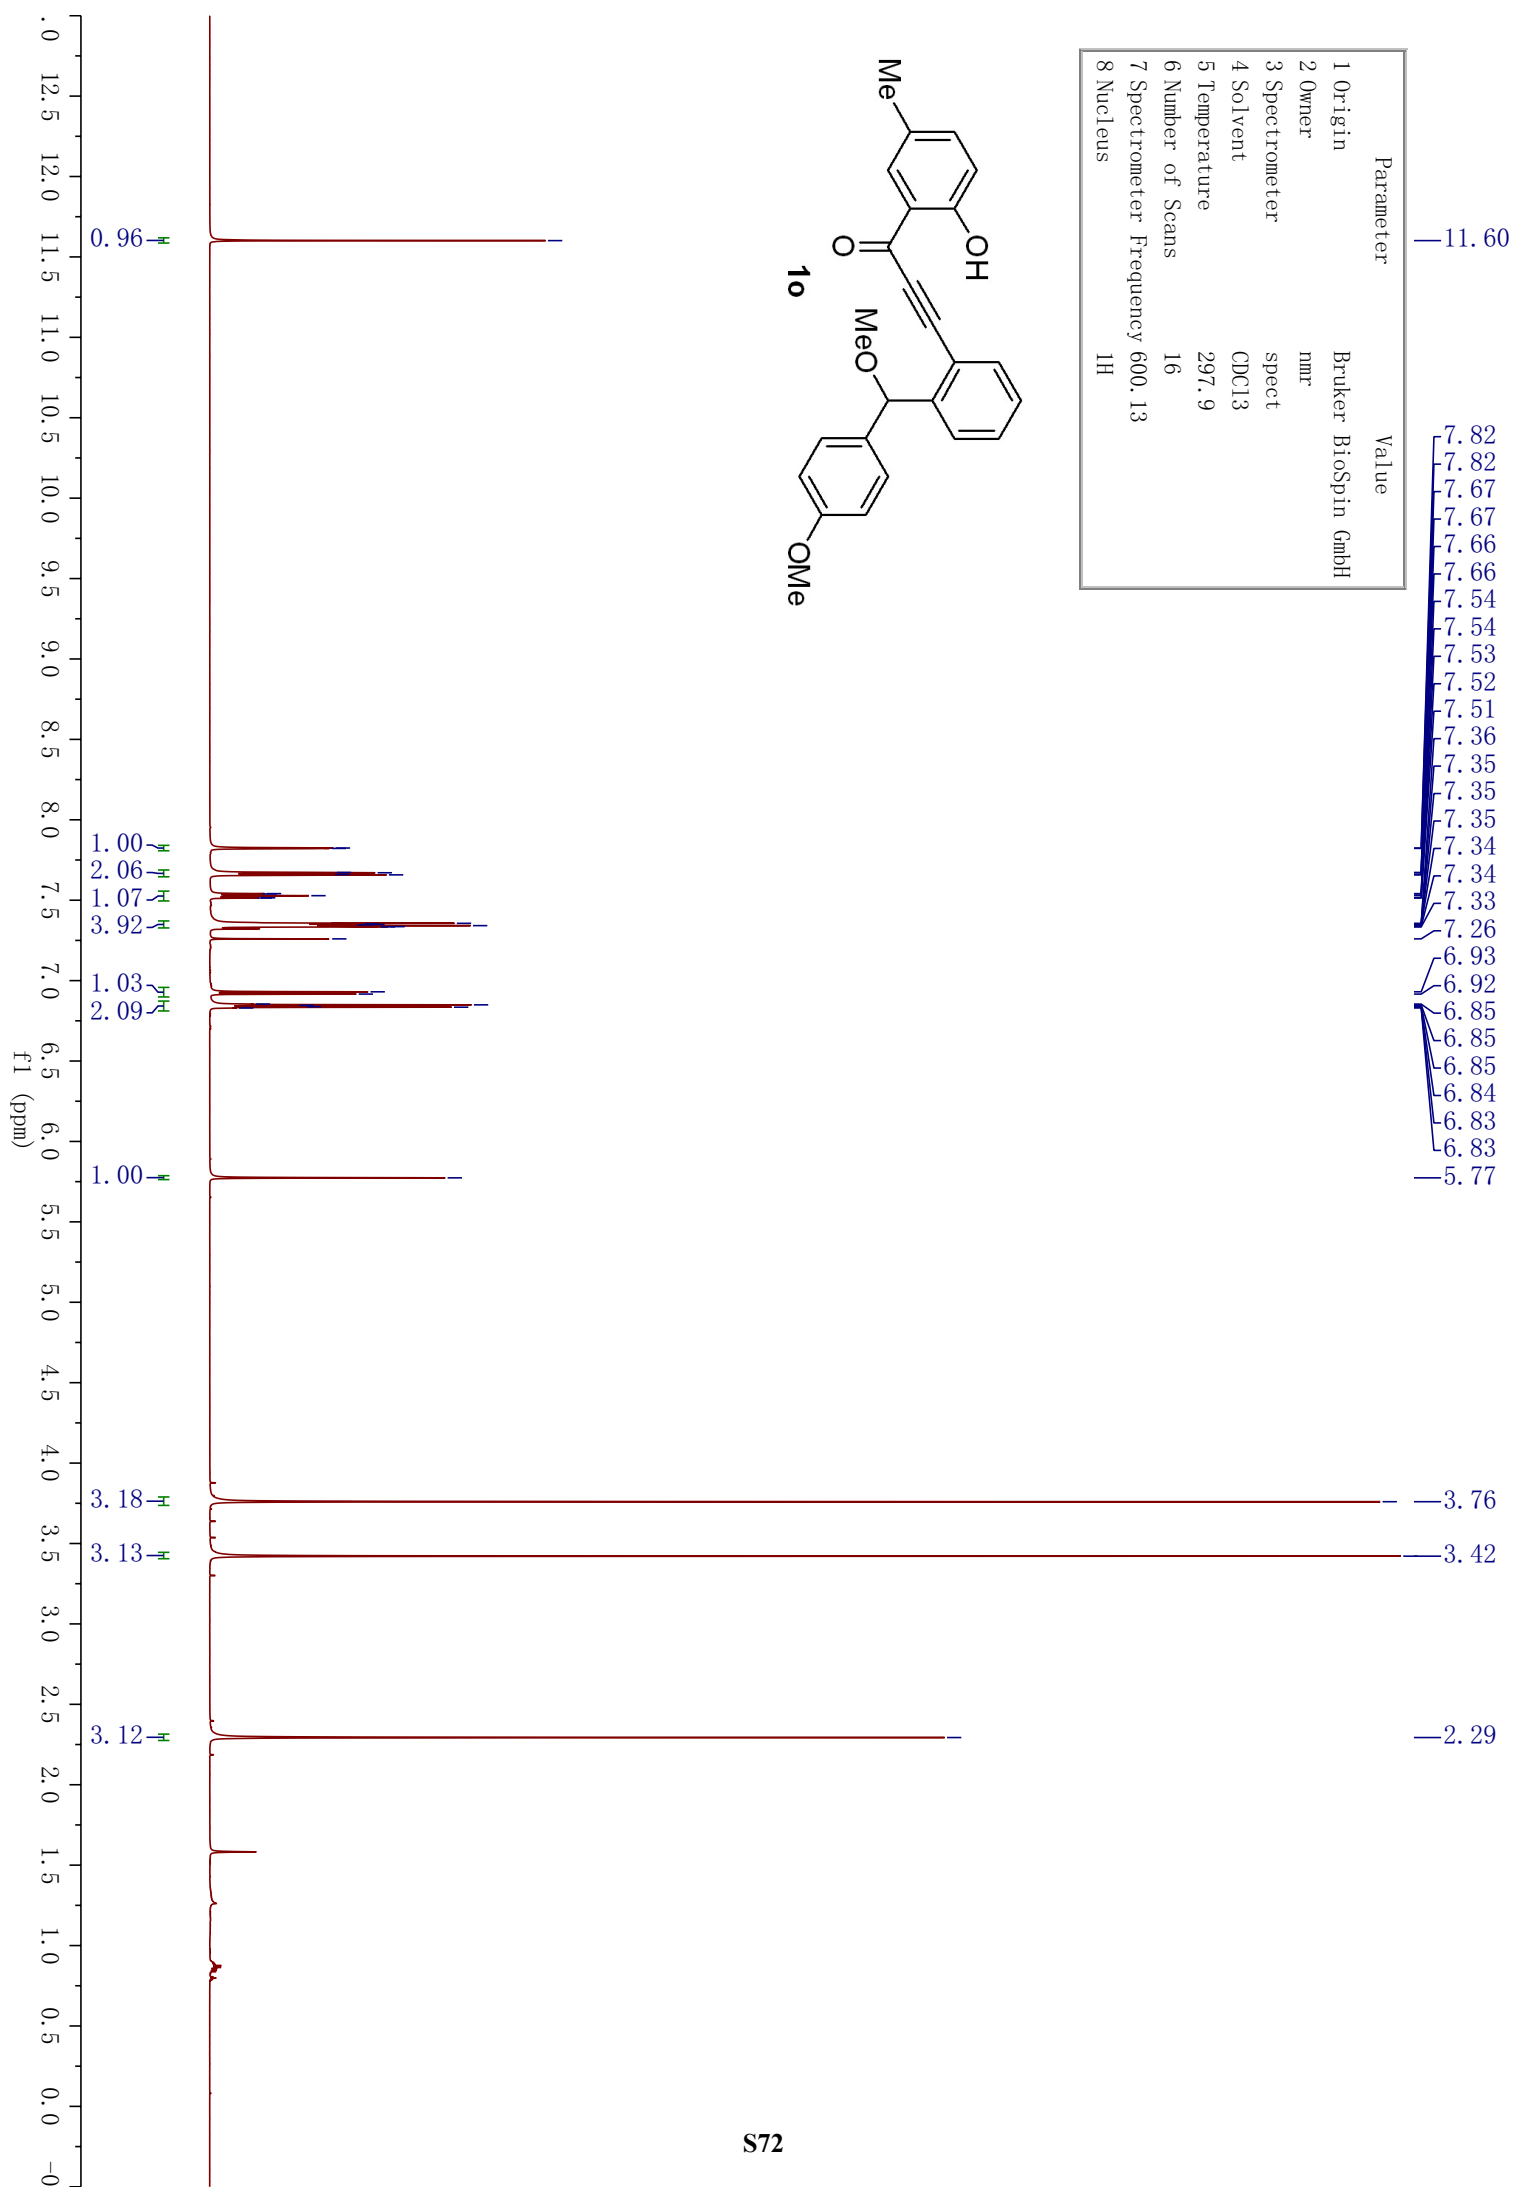

| Parameter                | Value                |
|--------------------------|----------------------|
| 1 Origin                 | Brucker Biospin GmbH |
| 2 Owner                  | nmr                  |
| 3 Spectrometer           | spect                |
| 4 Solvent                | CDCl3                |
| 5 Temperature            | 297.9                |
| 6 Number of Scans        | 945                  |
| 7 Spectrometer Frequency | 150.90               |
| 8 Nucleus                | <sup>13</sup> C      |

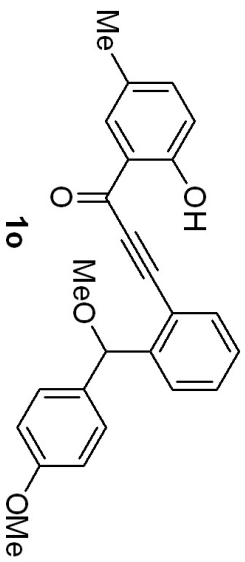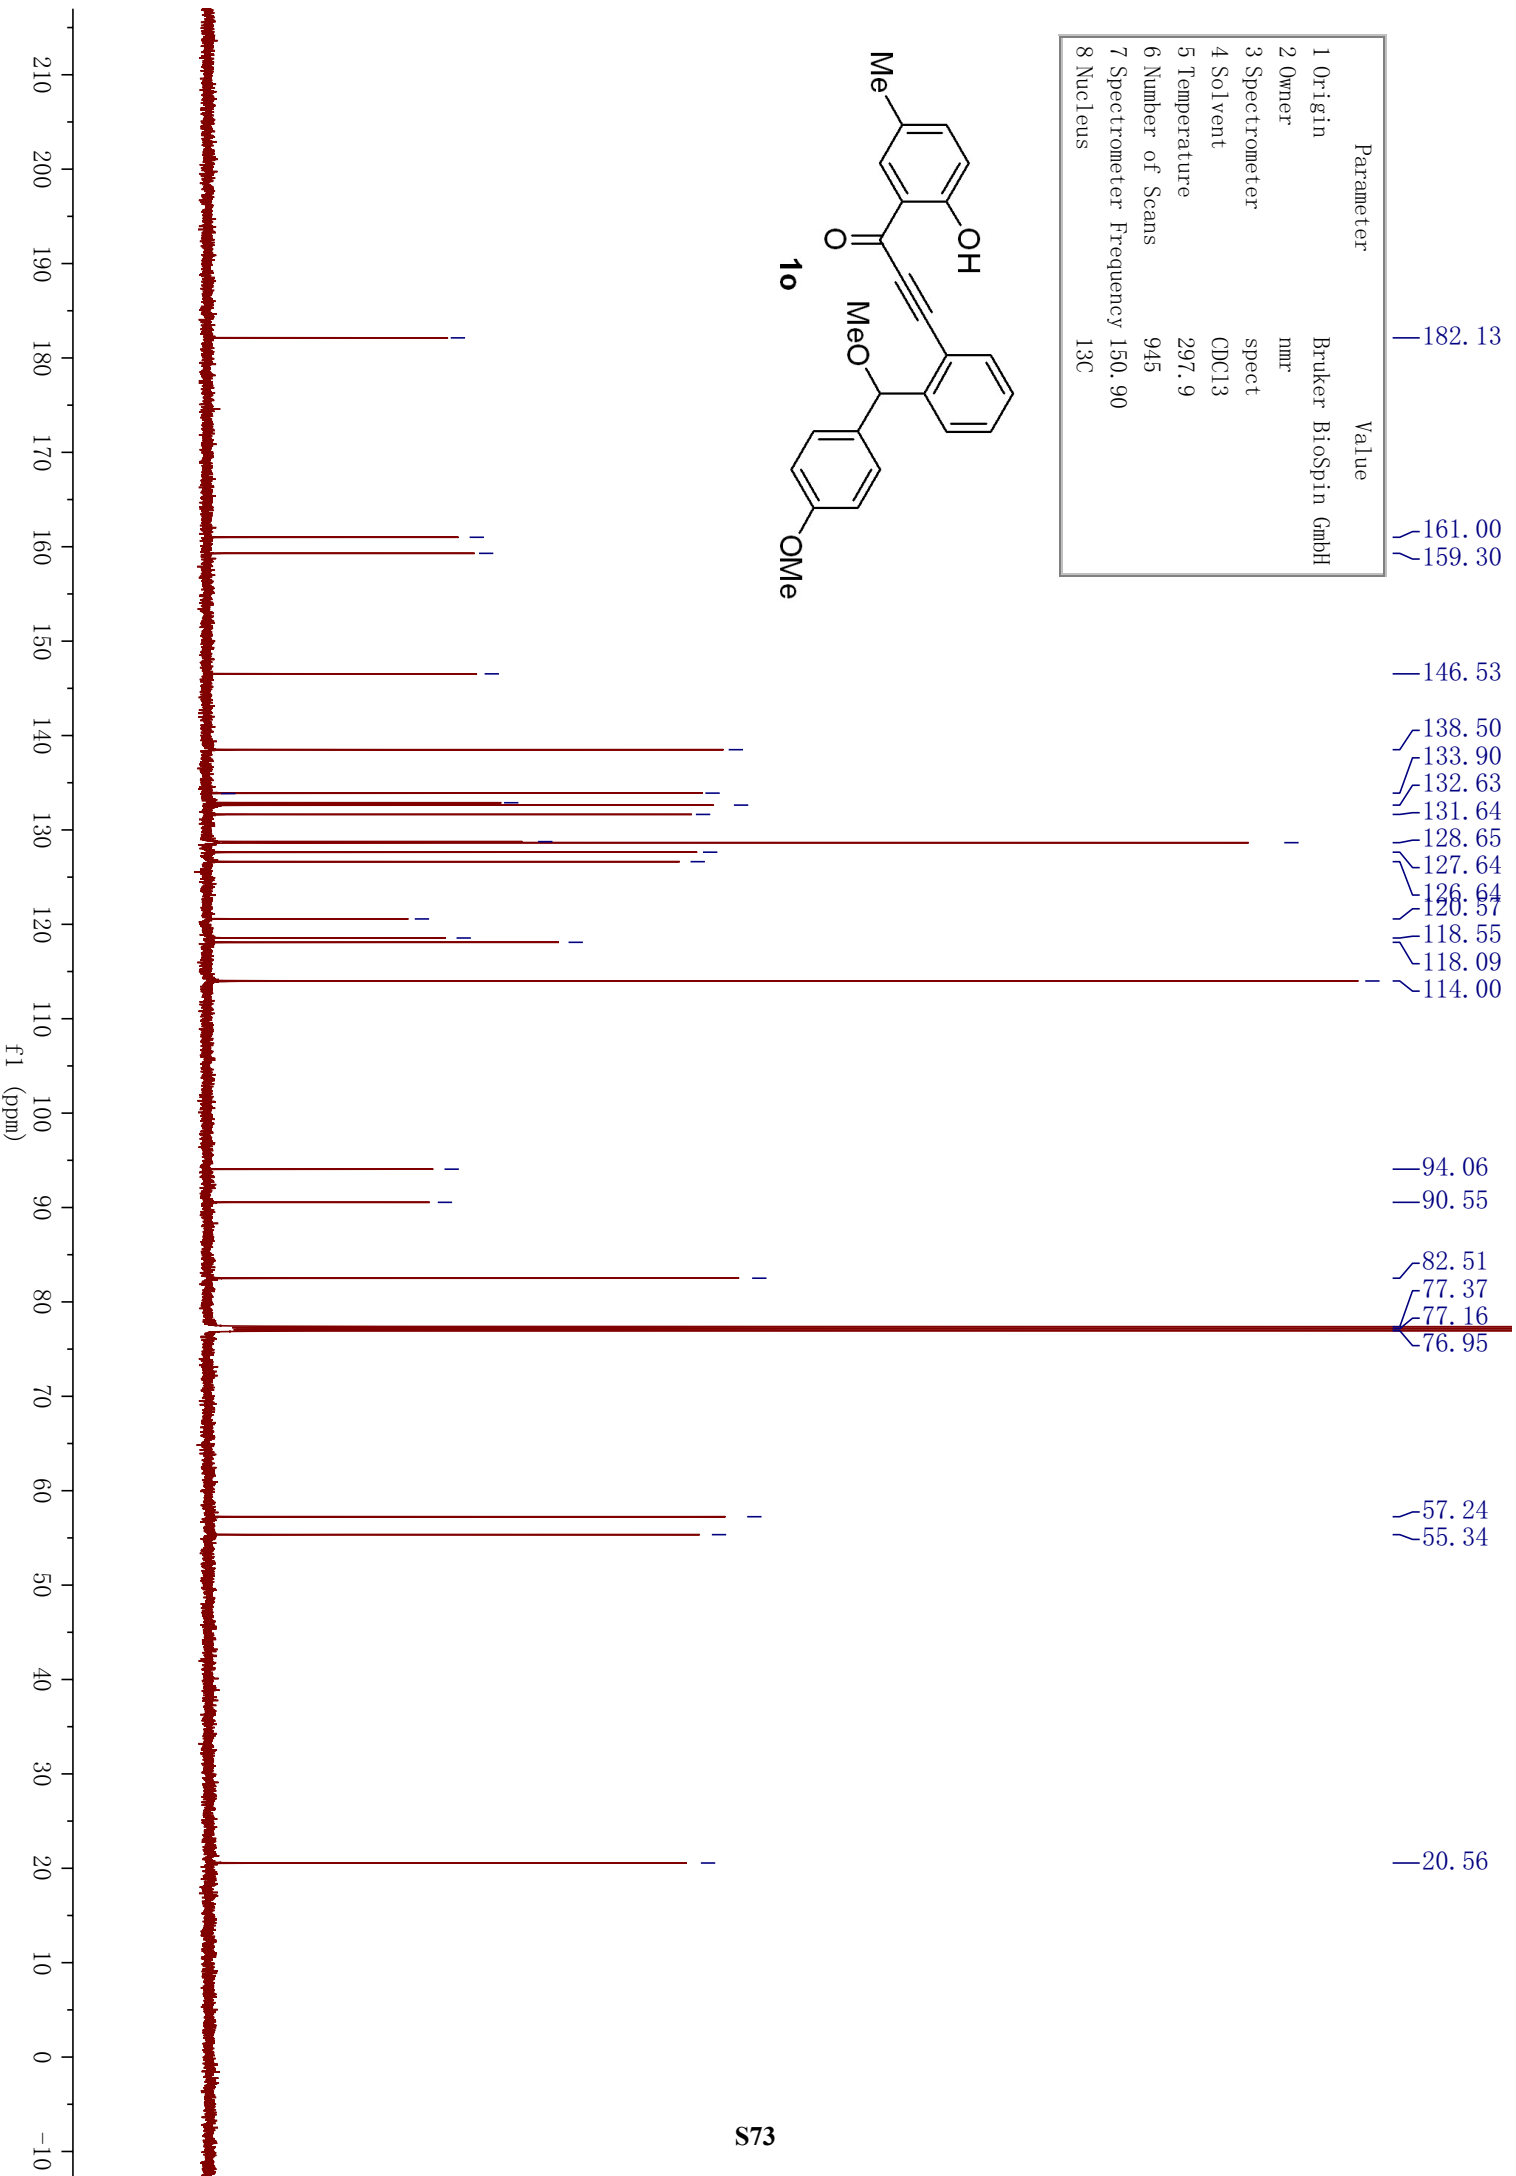

| Parameter                | Value                |
|--------------------------|----------------------|
| 1 Origin                 | Brucker Biospin GmbH |
| 2 Owner                  | nmr                  |
| 3 Spectrometer           | spect                |
| 4 Solvent                | CDCl3                |
| 5 Temperature            | 297.9                |
| 6 Number of Scans        | 16                   |
| 7 Spectrometer Frequency | 600.13               |
| 8 Nucleus                | <sup>1</sup> H       |

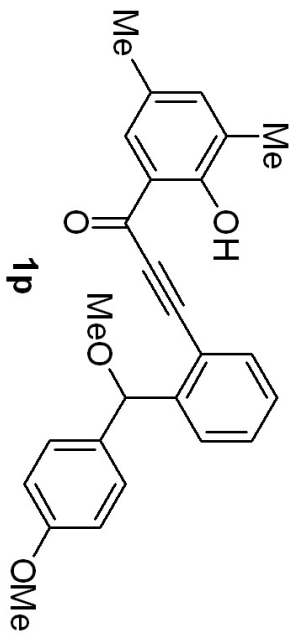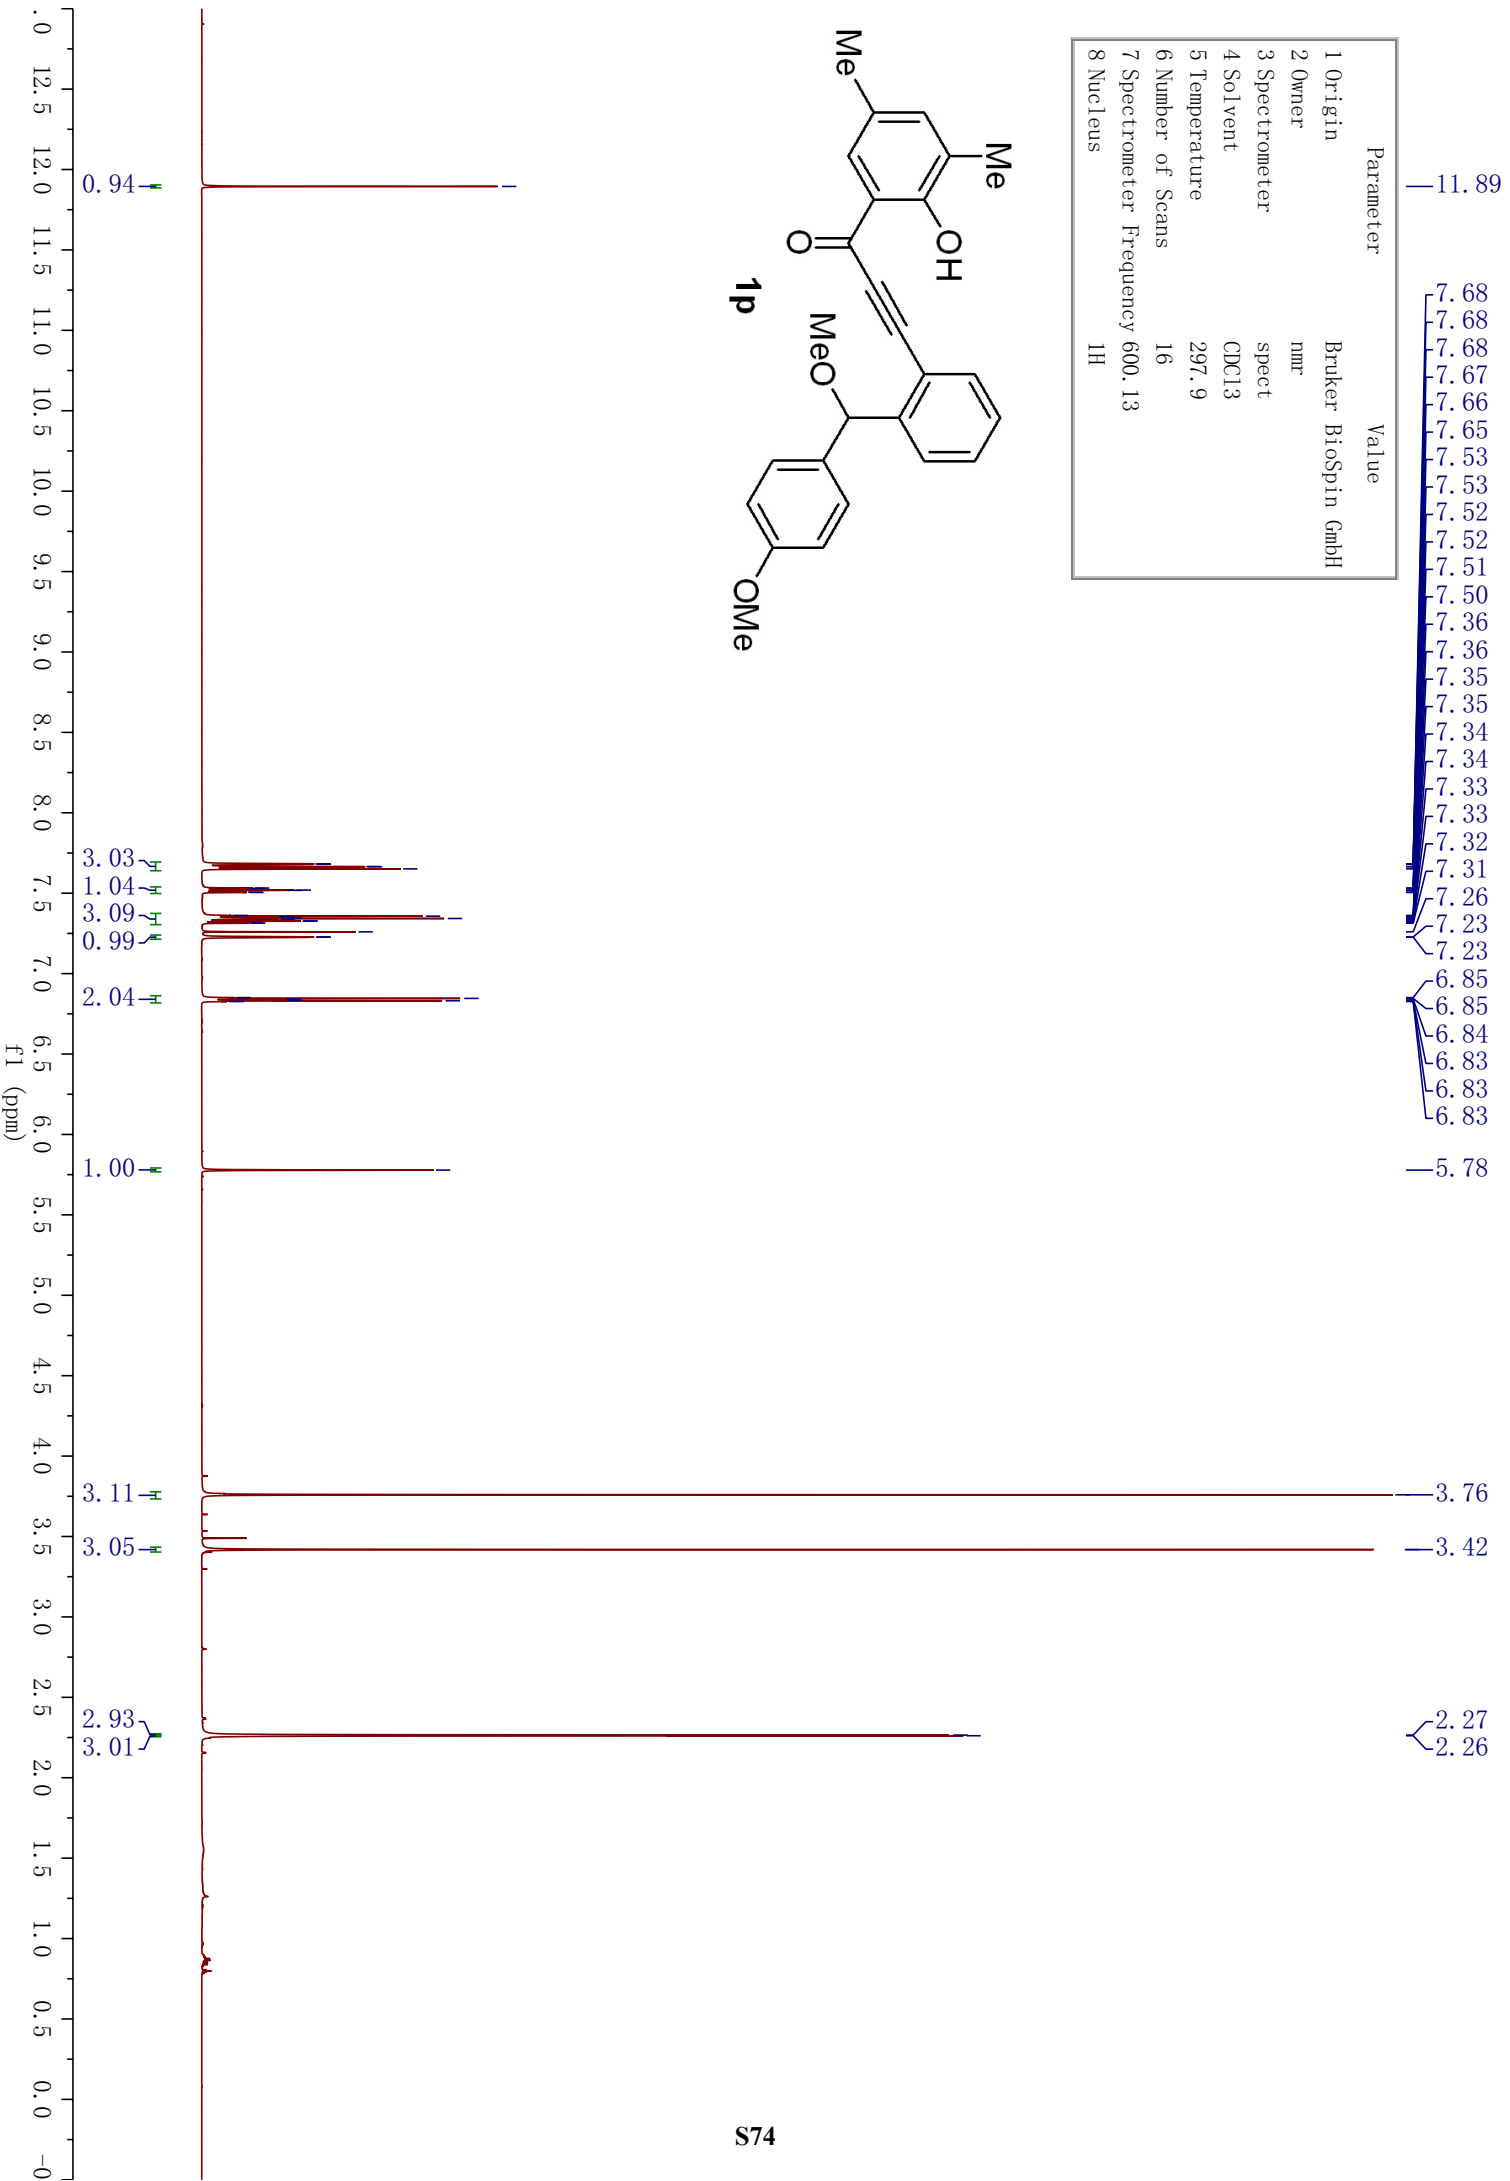

| Parameter                | Value               |
|--------------------------|---------------------|
| 1 Origin                 | Brüker Biospin GmbH |
| 2 Owner                  | nmr                 |
| 3 Spectrometer           | spect               |
| 4 Solvent                | CDCl <sub>3</sub>   |
| 5 Temperature            | 297.9               |
| 6 Number of Scans        | 432                 |
| 7 Spectrometer Frequency | 150.90              |
| 8 Nucleus                | <sup>13</sup> C     |

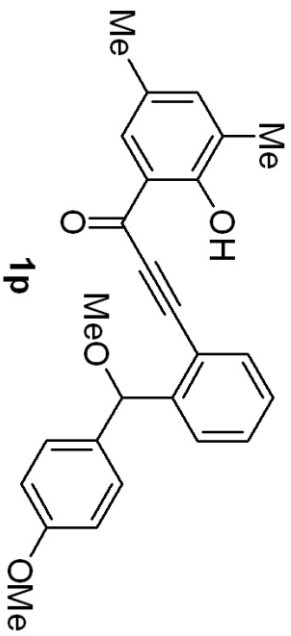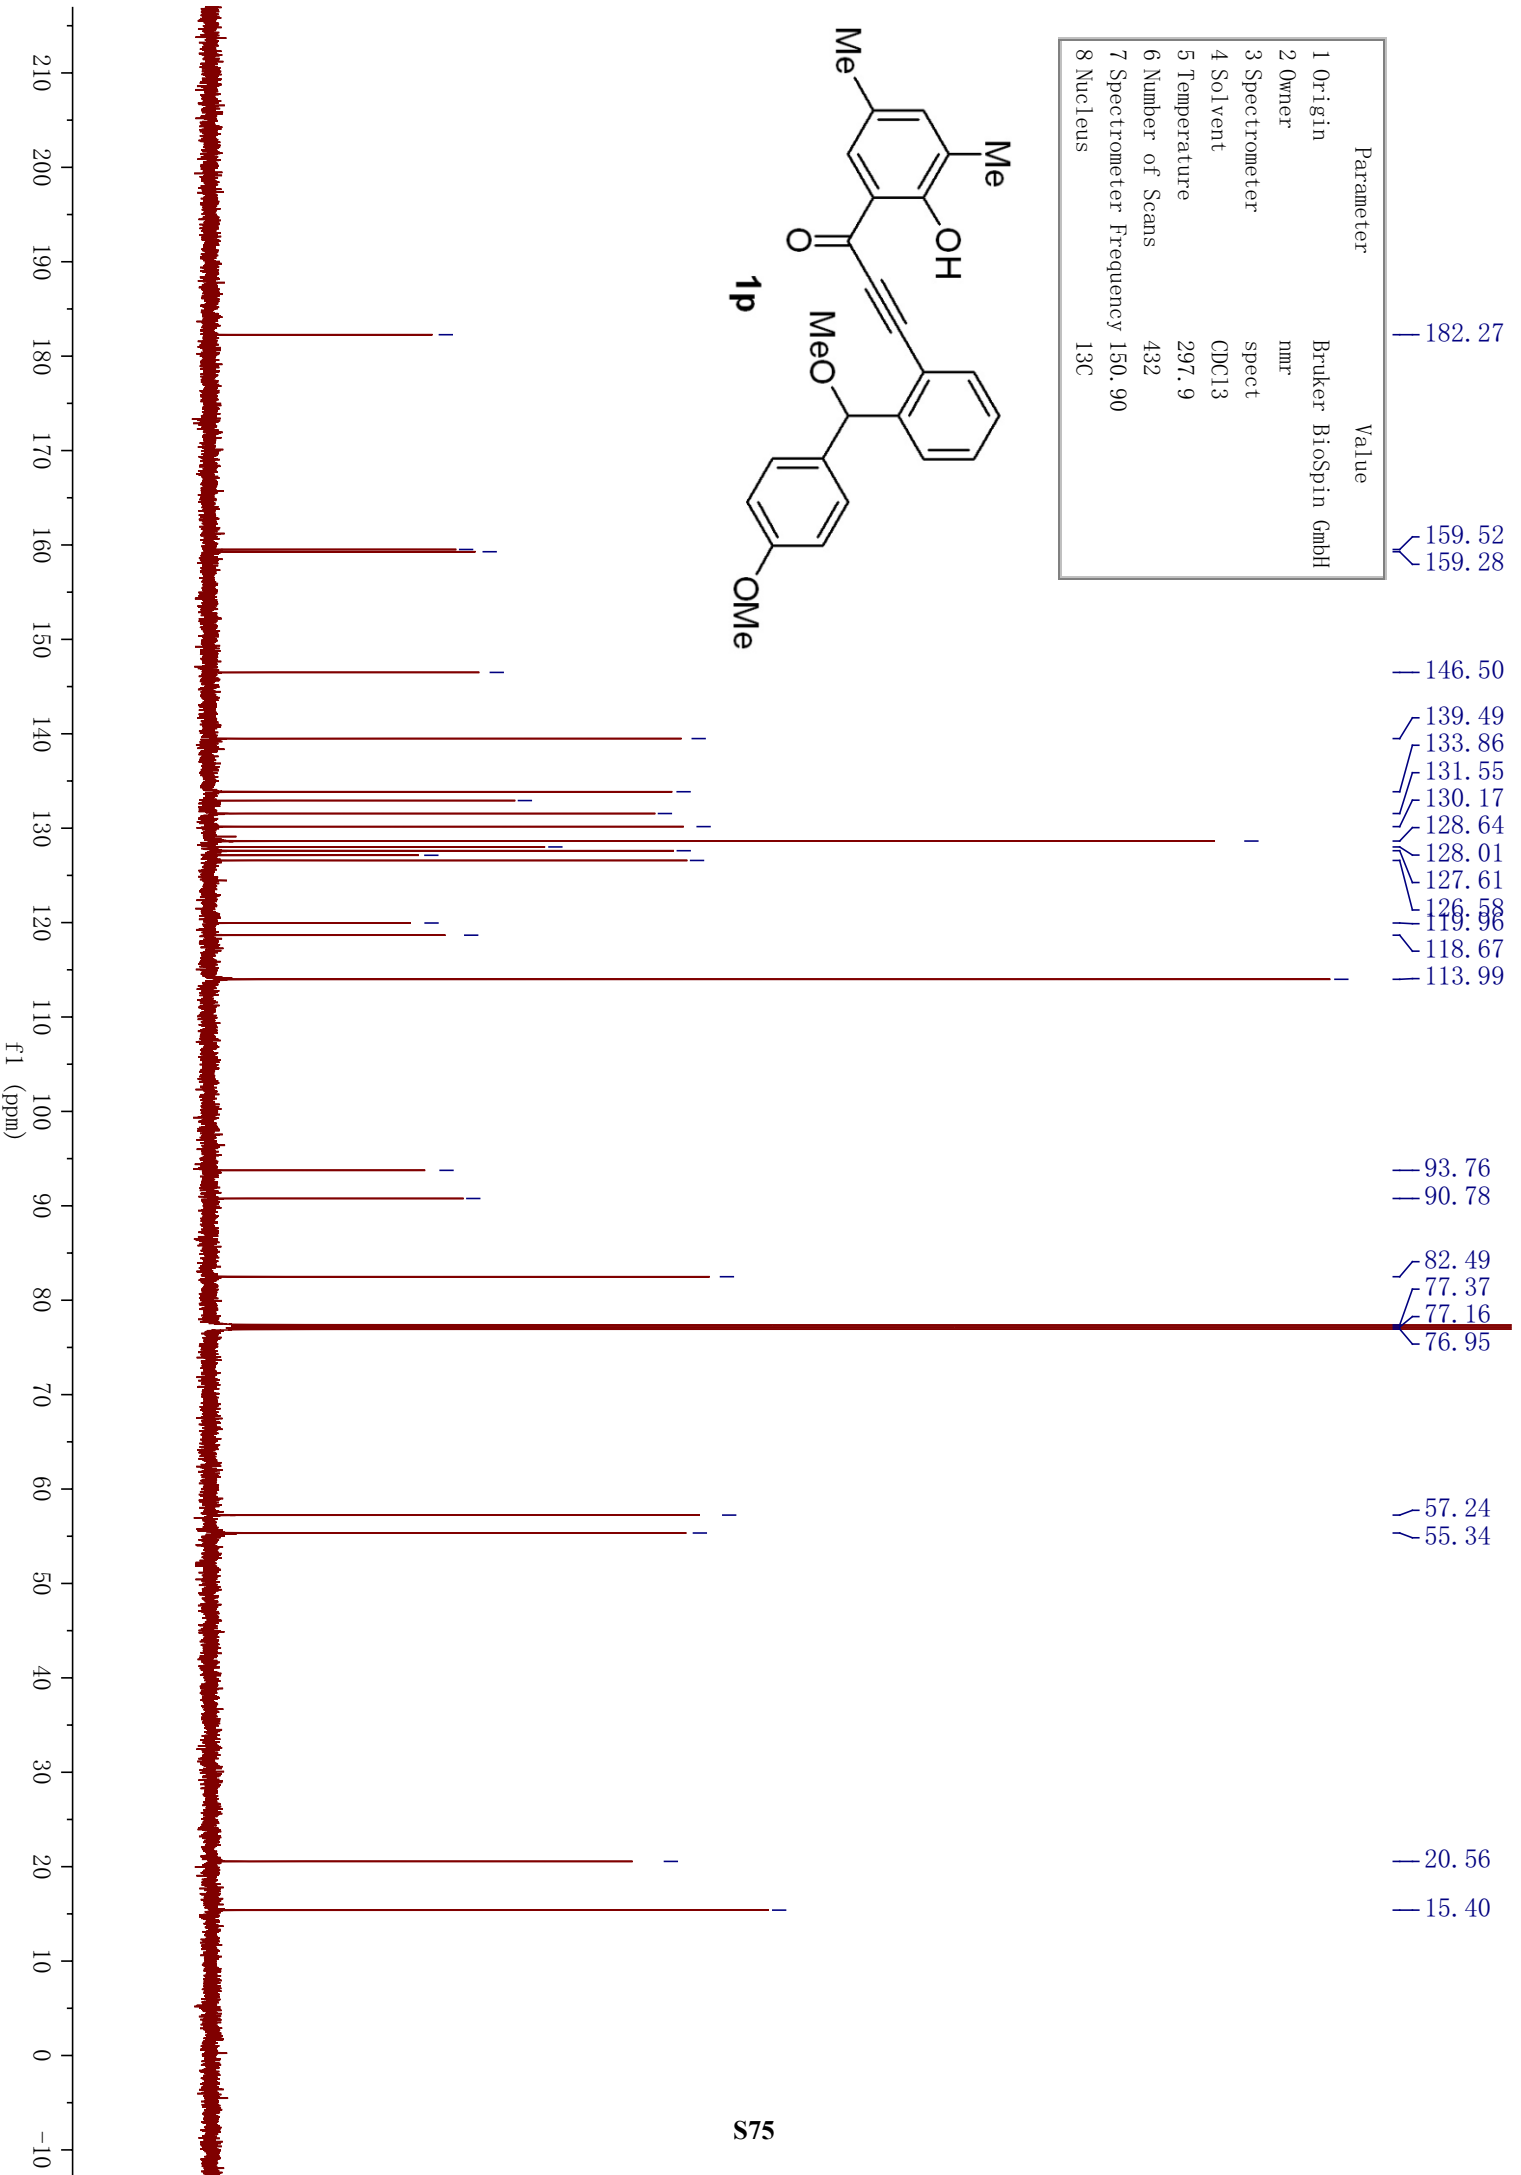



12.23  
12.23

| Parameter                | Value               |
|--------------------------|---------------------|
| 1 Origin                 | Bruker Biospin GmbH |
| 2 Owner                  | nmr                 |
| 3 Spectrometer           | spect               |
| 4 Solvent                | CDCl3               |
| 5 Temperature            | 297.9               |
| 6 Number of Scans        | 16                  |
| 7 Spectrometer Frequency | 600.13              |
| 8 Nucleus                | 1H                  |

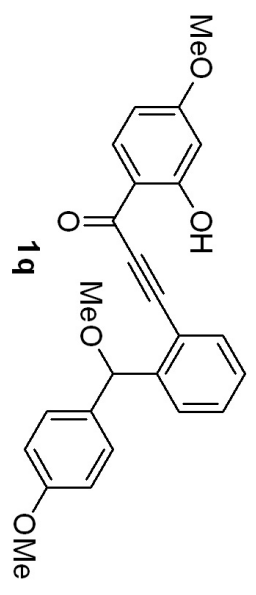

7.83  
7.82  
7.66  
7.65  
7.63  
7.53  
7.51  
7.50  
7.34  
7.33  
7.32  
7.31  
7.31  
7.26  
6.85  
6.84  
6.46  
6.46  
6.45  
6.44  
6.44  
5.74

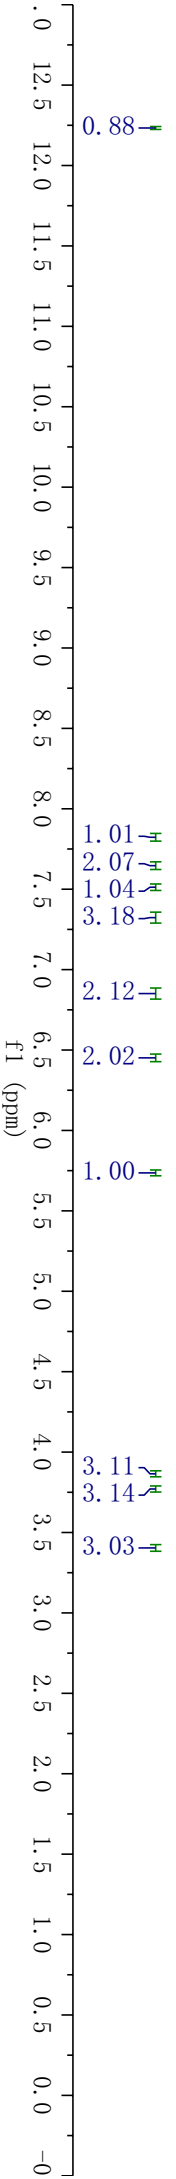

3.87  
3.77  
3.41

| Parameter                | Value               |
|--------------------------|---------------------|
| 1 Origin                 | Bruker Biospin GmbH |
| 2 Owner                  | nmr                 |
| 3 Spectrometer           | spect               |
| 4 Solvent                | CDCl3               |
| 5 Temperature            | 297.9               |
| 6 Number of Scans        | 532                 |
| 7 Spectrometer Frequency | 150.90              |
| 8 Nucleus                | <sup>13</sup> C     |

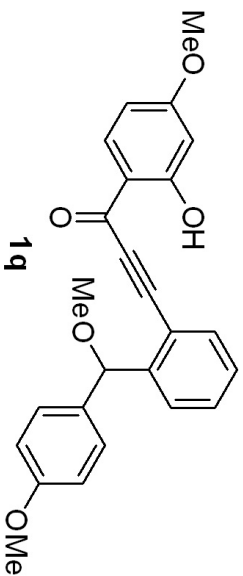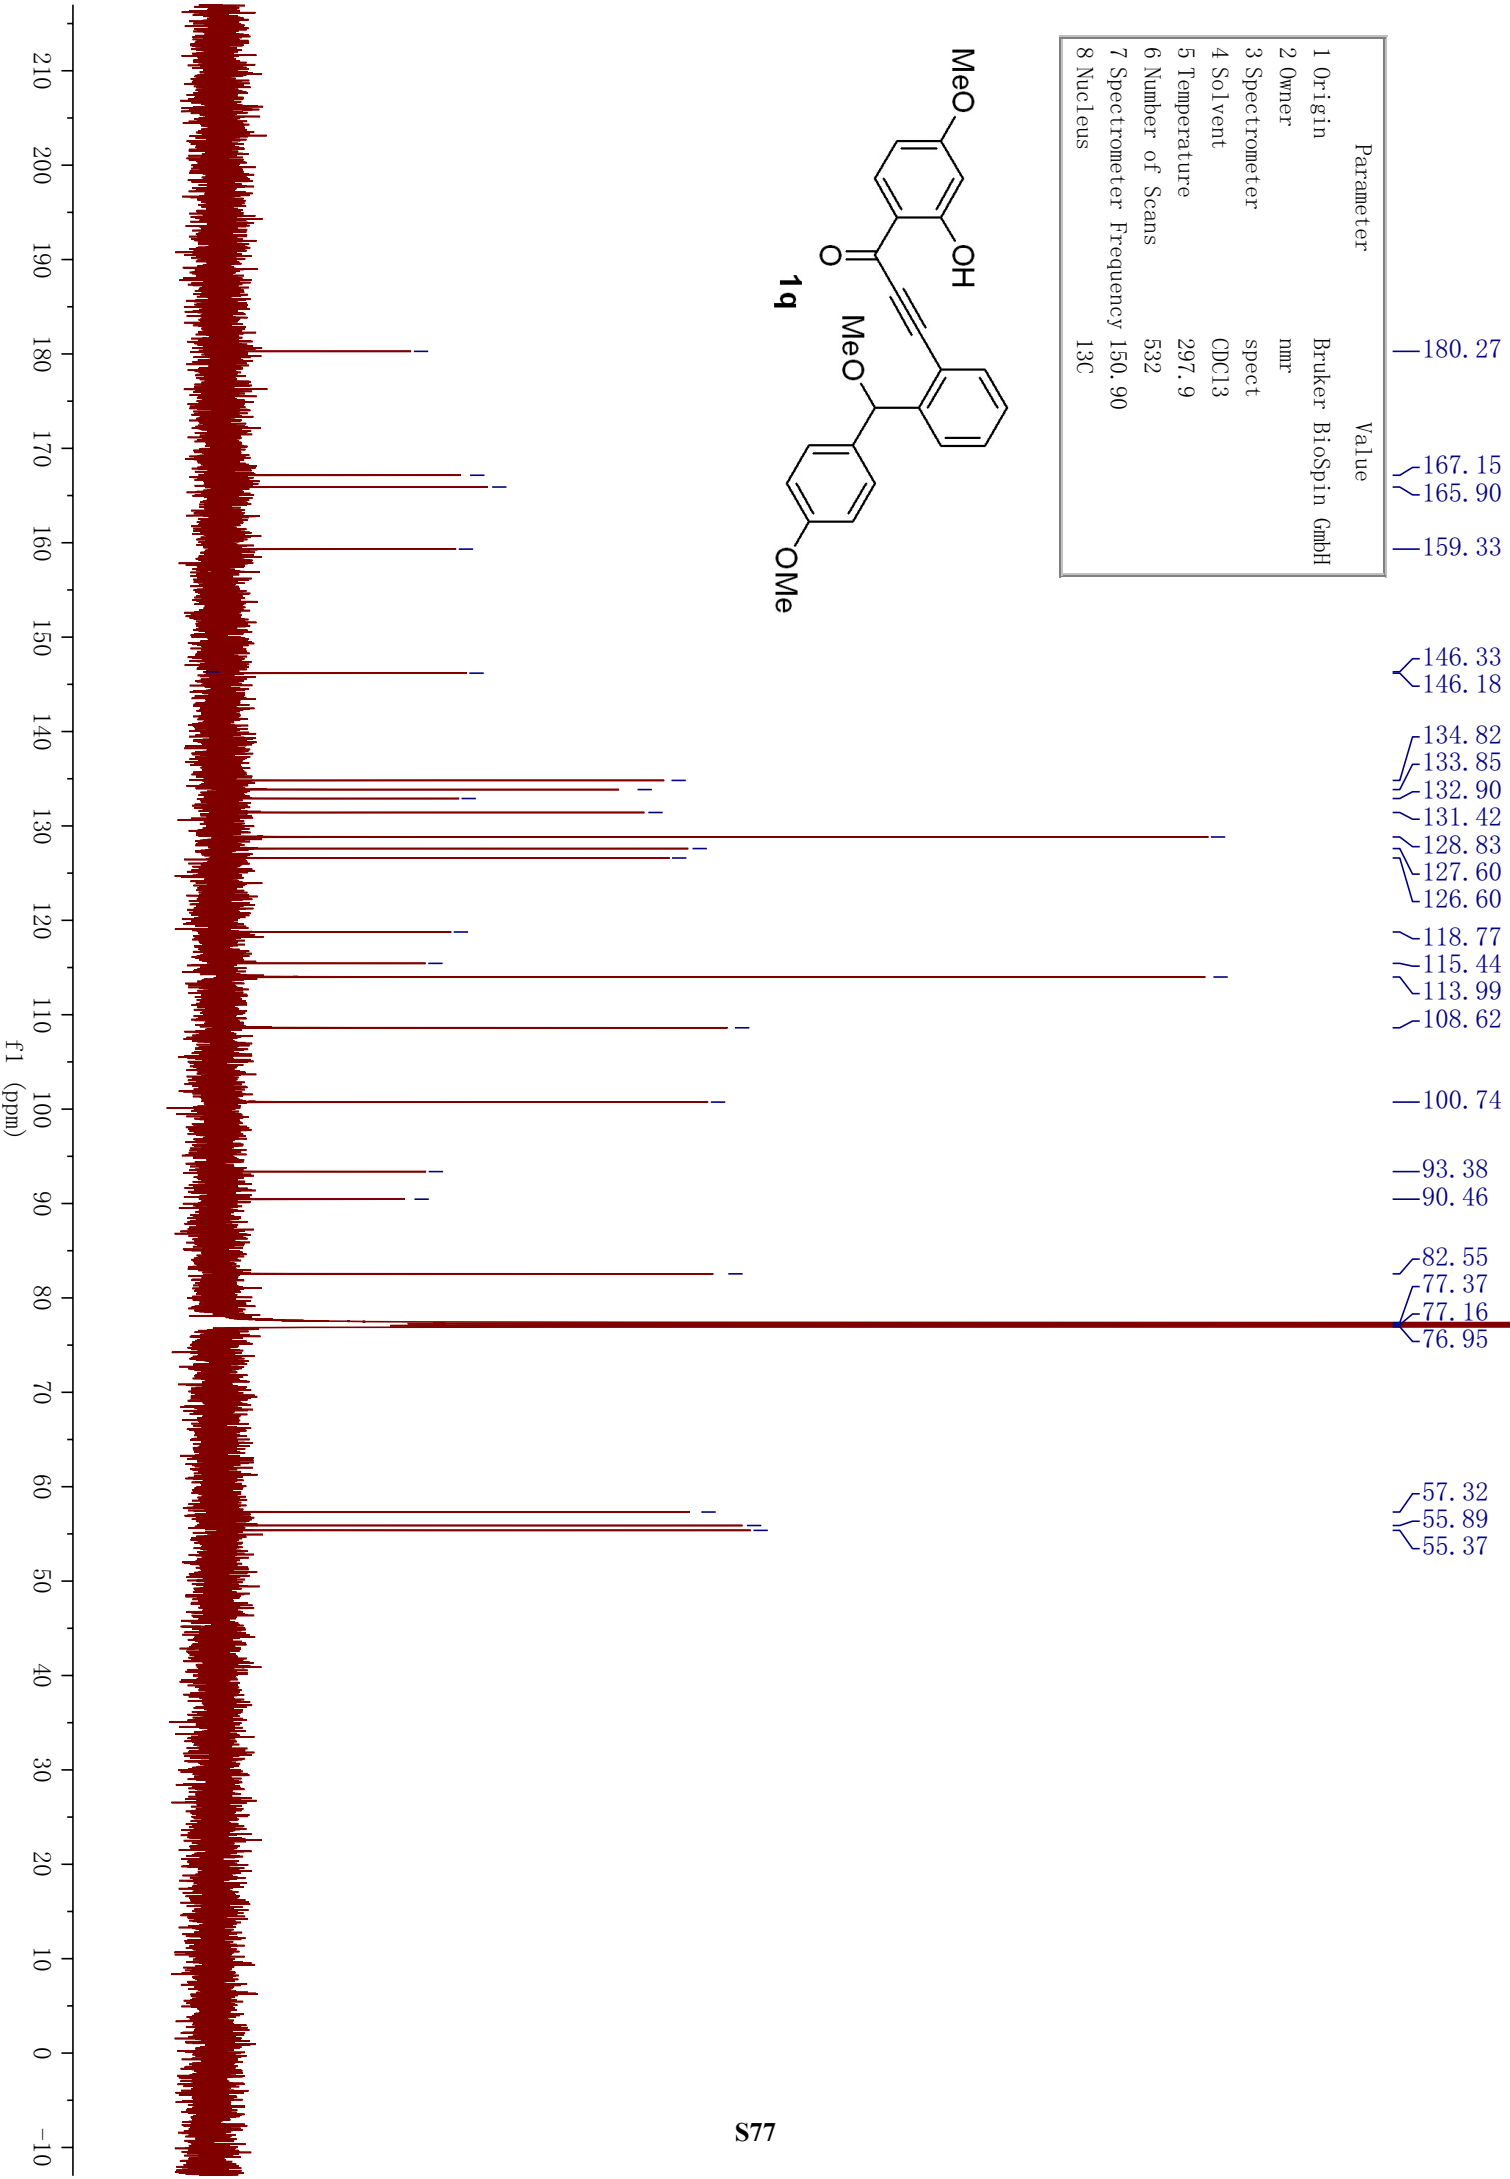

| Parameter                | Value               |
|--------------------------|---------------------|
| 1 Origin                 | Brüker Biospin GmbH |
| 2 Owner                  | nmr                 |
| 3 Spectrometer           | spect               |
| 4 Solvent                | CDCl3               |
| 5 Temperature            | 297.9               |
| 6 Number of Scans        | 16                  |
| 7 Spectrometer Frequency | 600.13              |
| 8 Nucleus                | 1H                  |

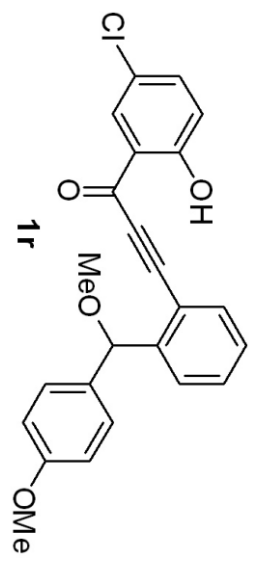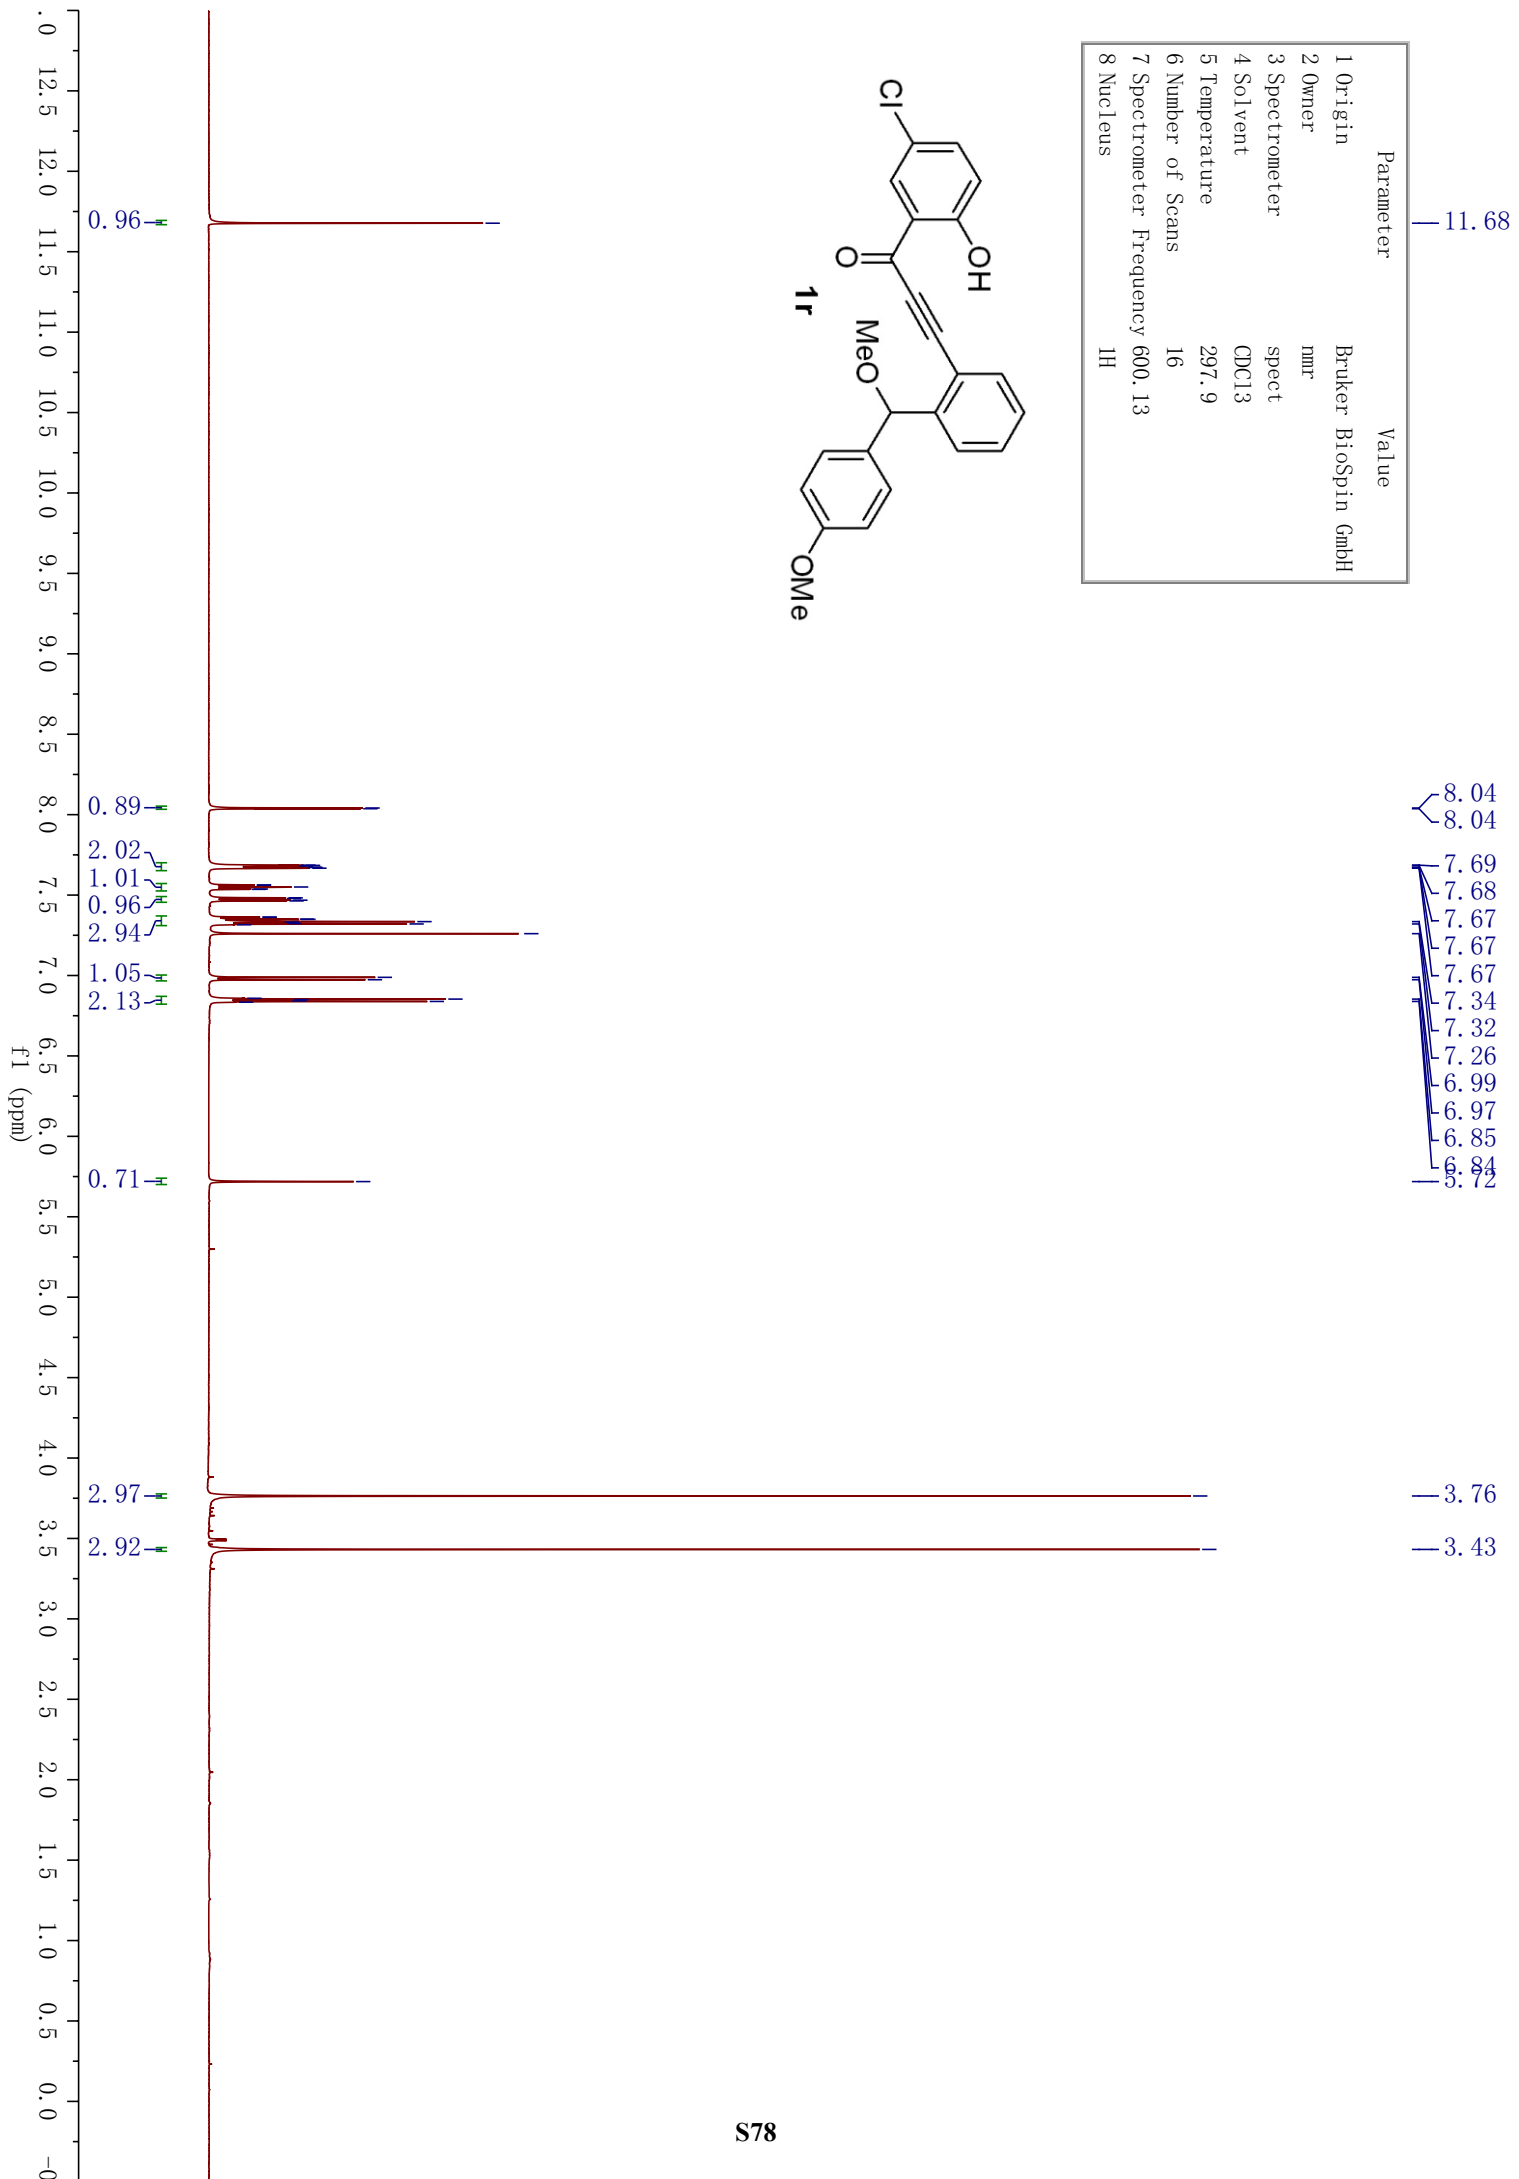

| Parameter                | Value               |
|--------------------------|---------------------|
| 1 Origin                 | Brüker BioSpin GmbH |
| 2 Owner                  | nmr                 |
| 3 Spectrometer           | spect               |
| 4 Solvent                | CDCl3               |
| 5 Temperature            | 297.9               |
| 6 Number of Scans        | 94                  |
| 7 Spectrometer Frequency | 150.90              |
| 8 Nucleus                | <sup>13</sup> C     |

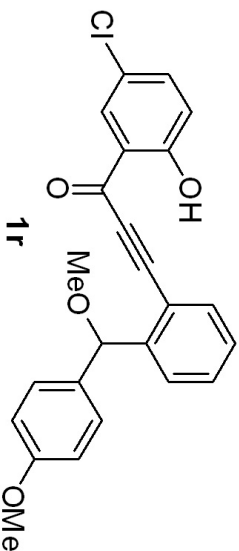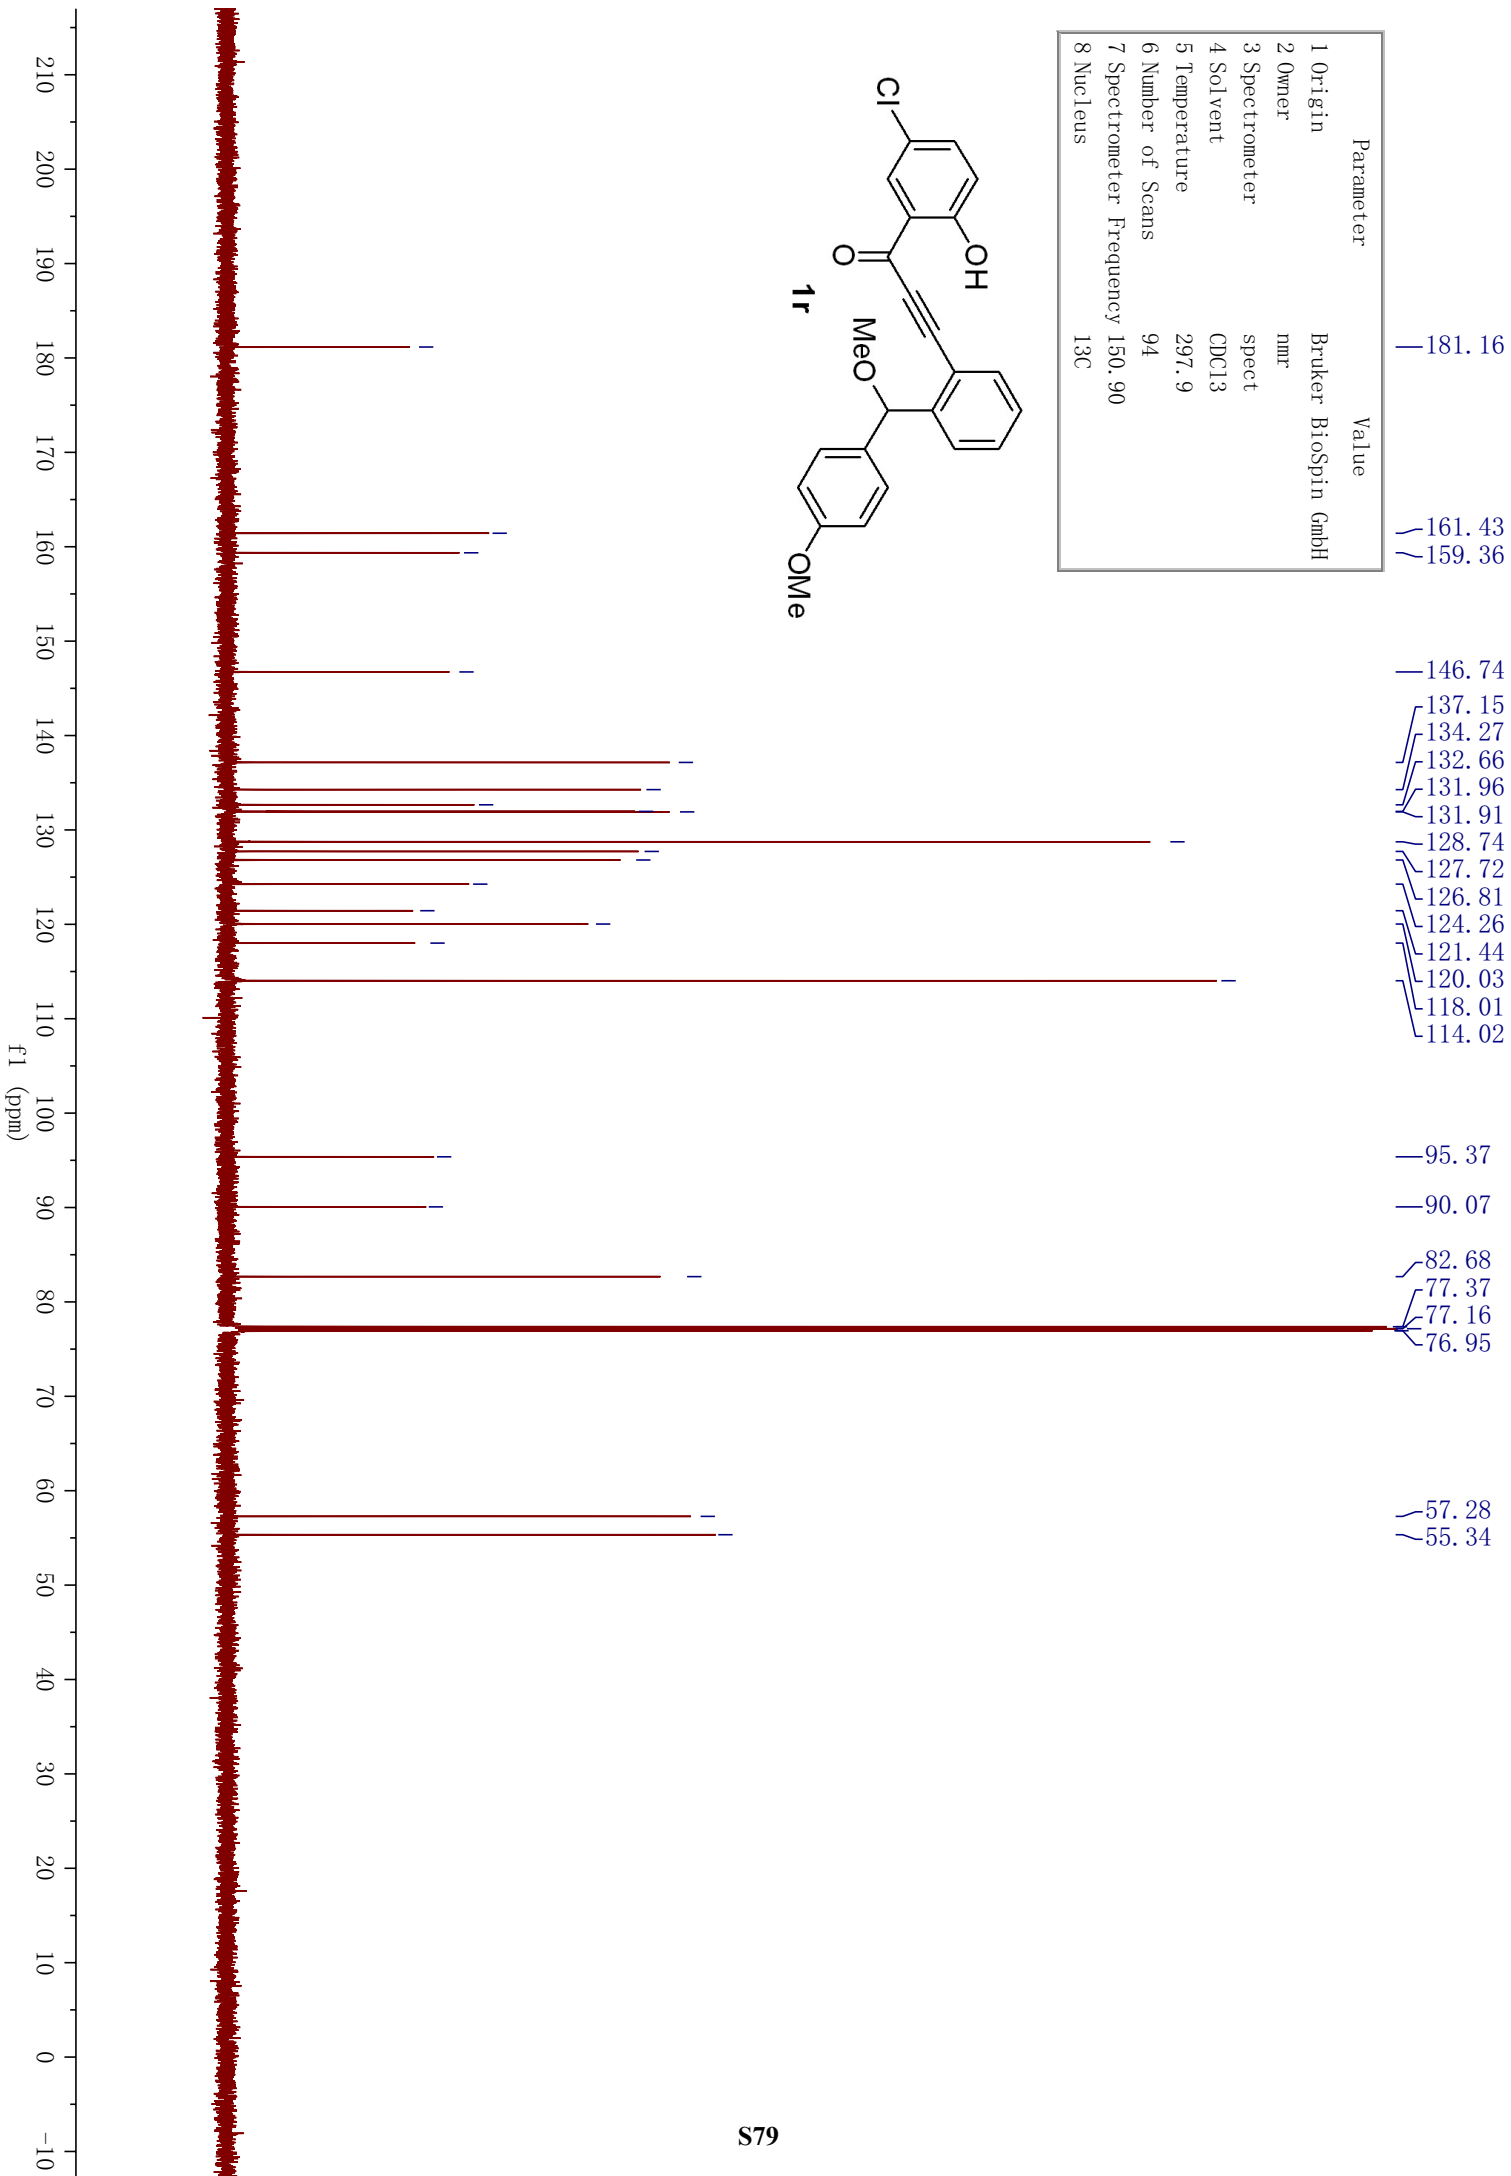

| Parameter                | Value                |
|--------------------------|----------------------|
| 1 Origin                 | Brucker BioSpin GmbH |
| 2 Owner                  | nmr                  |
| 3 Spectrometer           | spect                |
| 4 Solvent                | CDCl3                |
| 5 Temperature            | 297.9                |
| 6 Number of Scans        | 16                   |
| 7 Spectrometer Frequency | 600.13               |
| 8 Nucleus                | 1H                   |

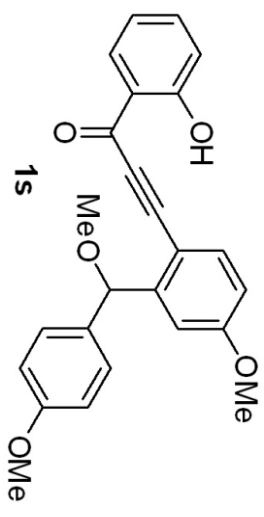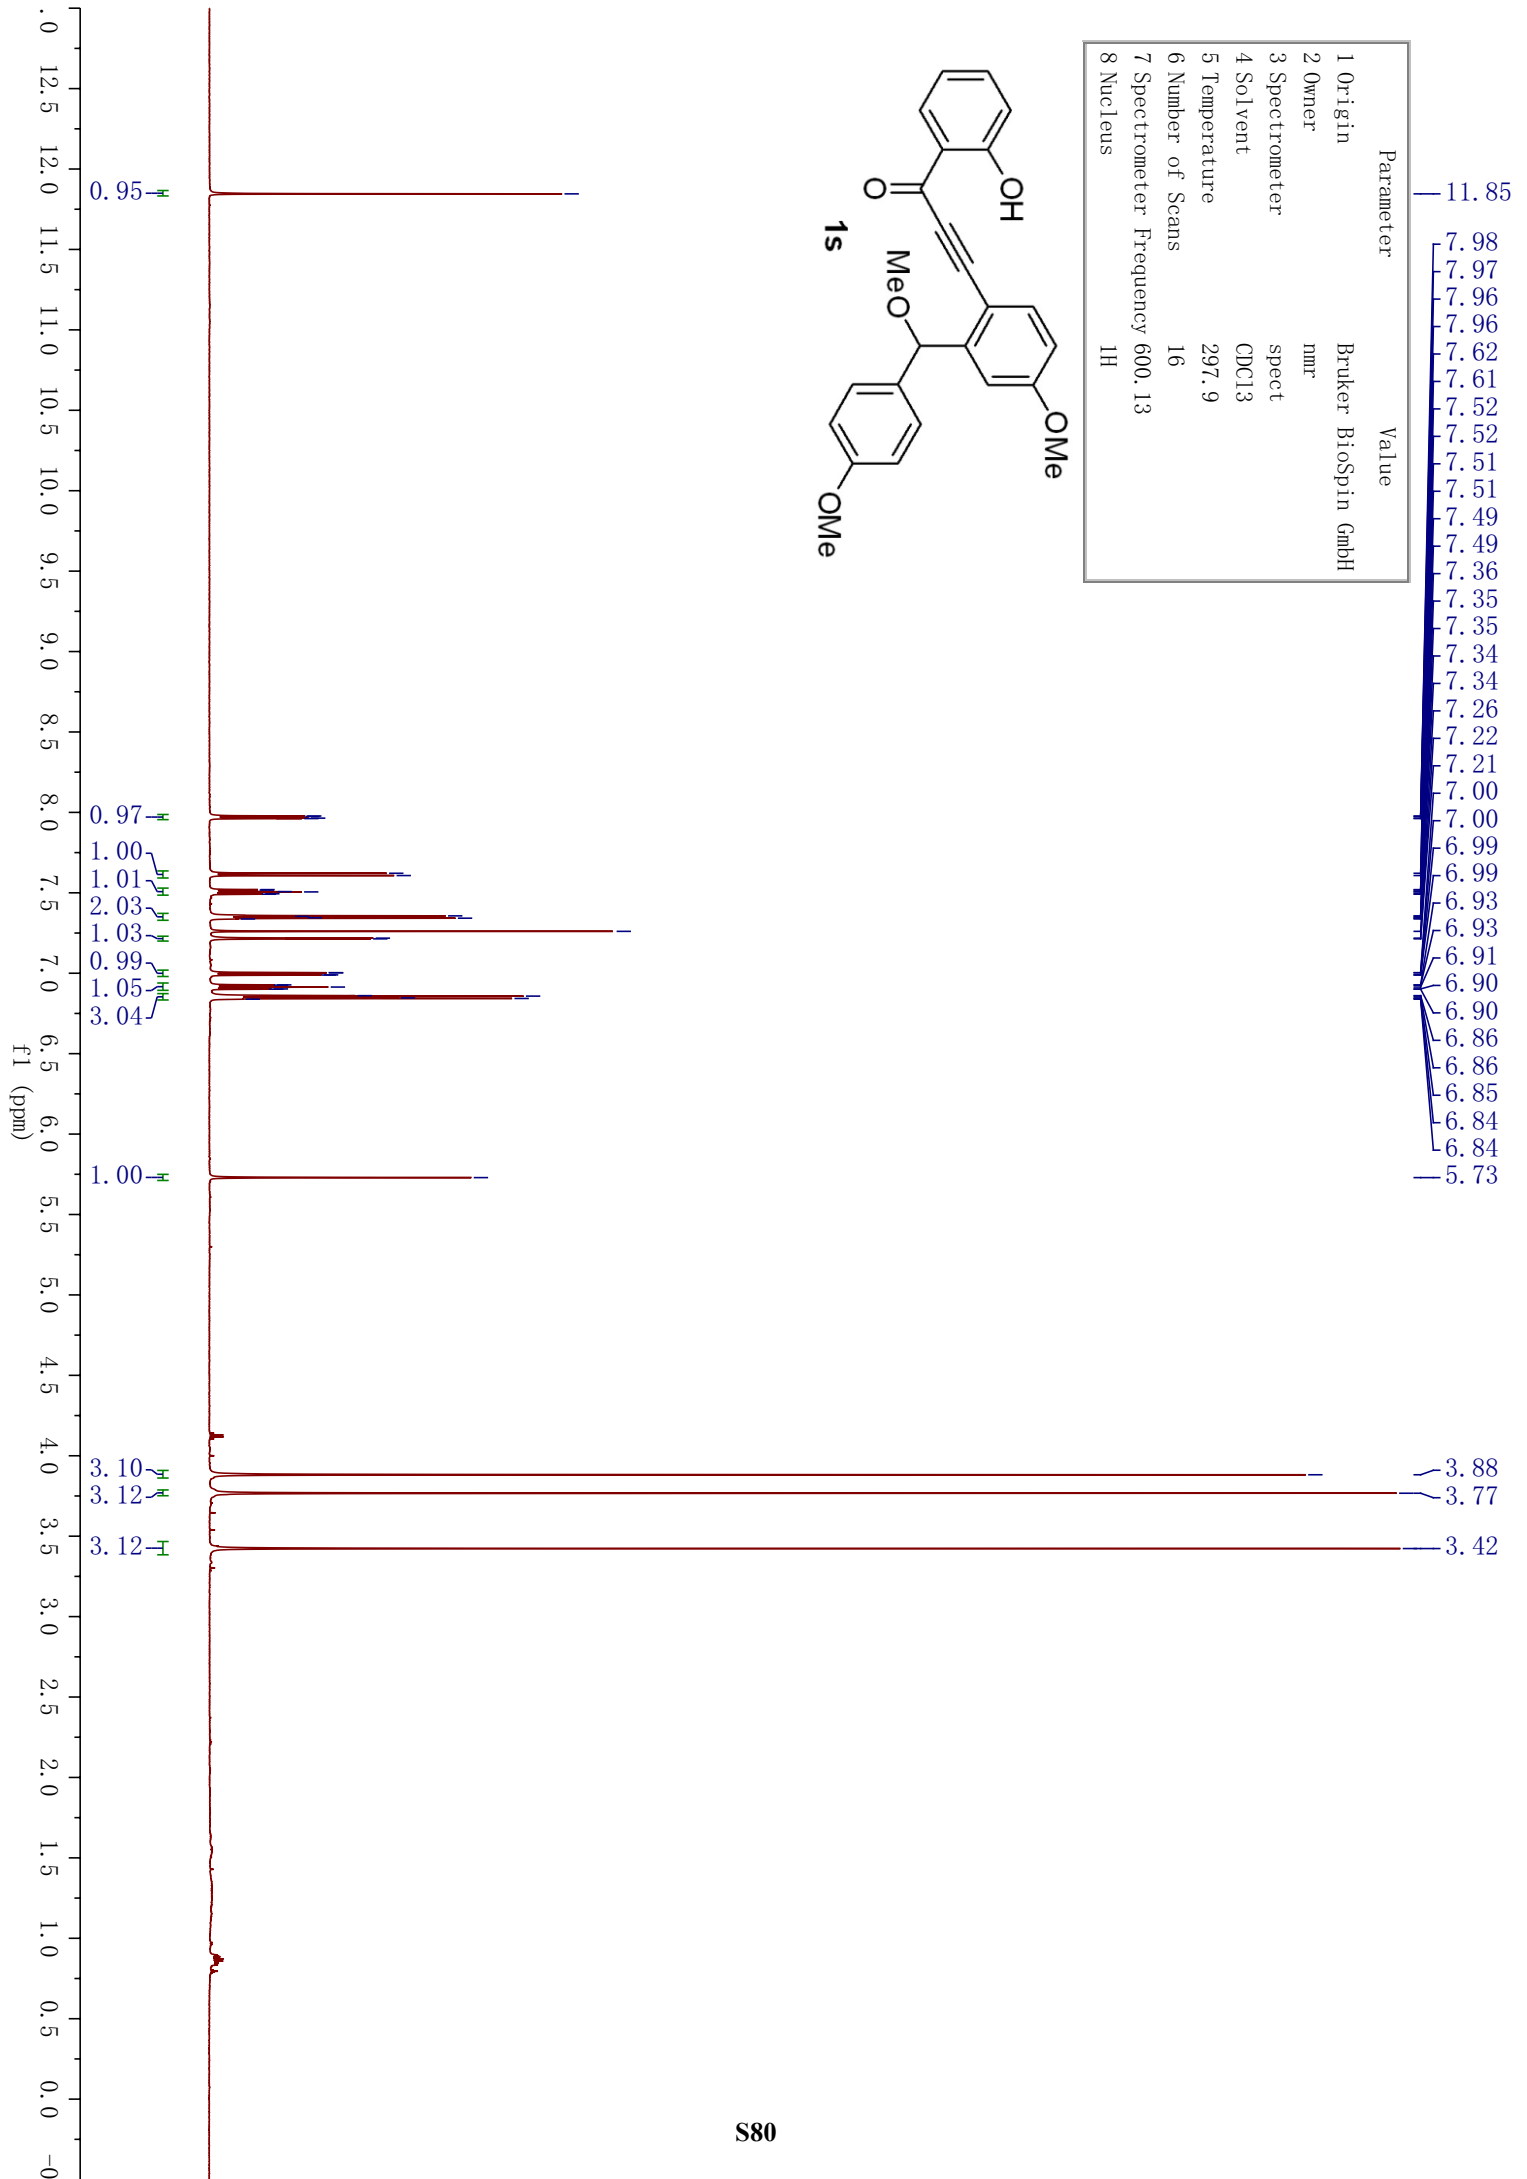

| Parameter                | Value               |
|--------------------------|---------------------|
| 1 Origin                 | Bruker Biospin GmbH |
| 2 Owner                  | nmr                 |
| 3 Spectrometer           | spect               |
| 4 Solvent                | CDCl3               |
| 5 Temperature            | 297.9               |
| 6 Number of Scans        | 484                 |
| 7 Spectrometer Frequency | 150.90              |
| 8 Nucleus                | <sup>13</sup> C     |

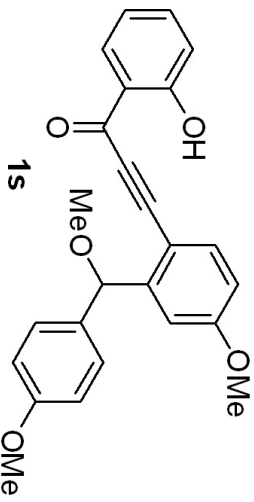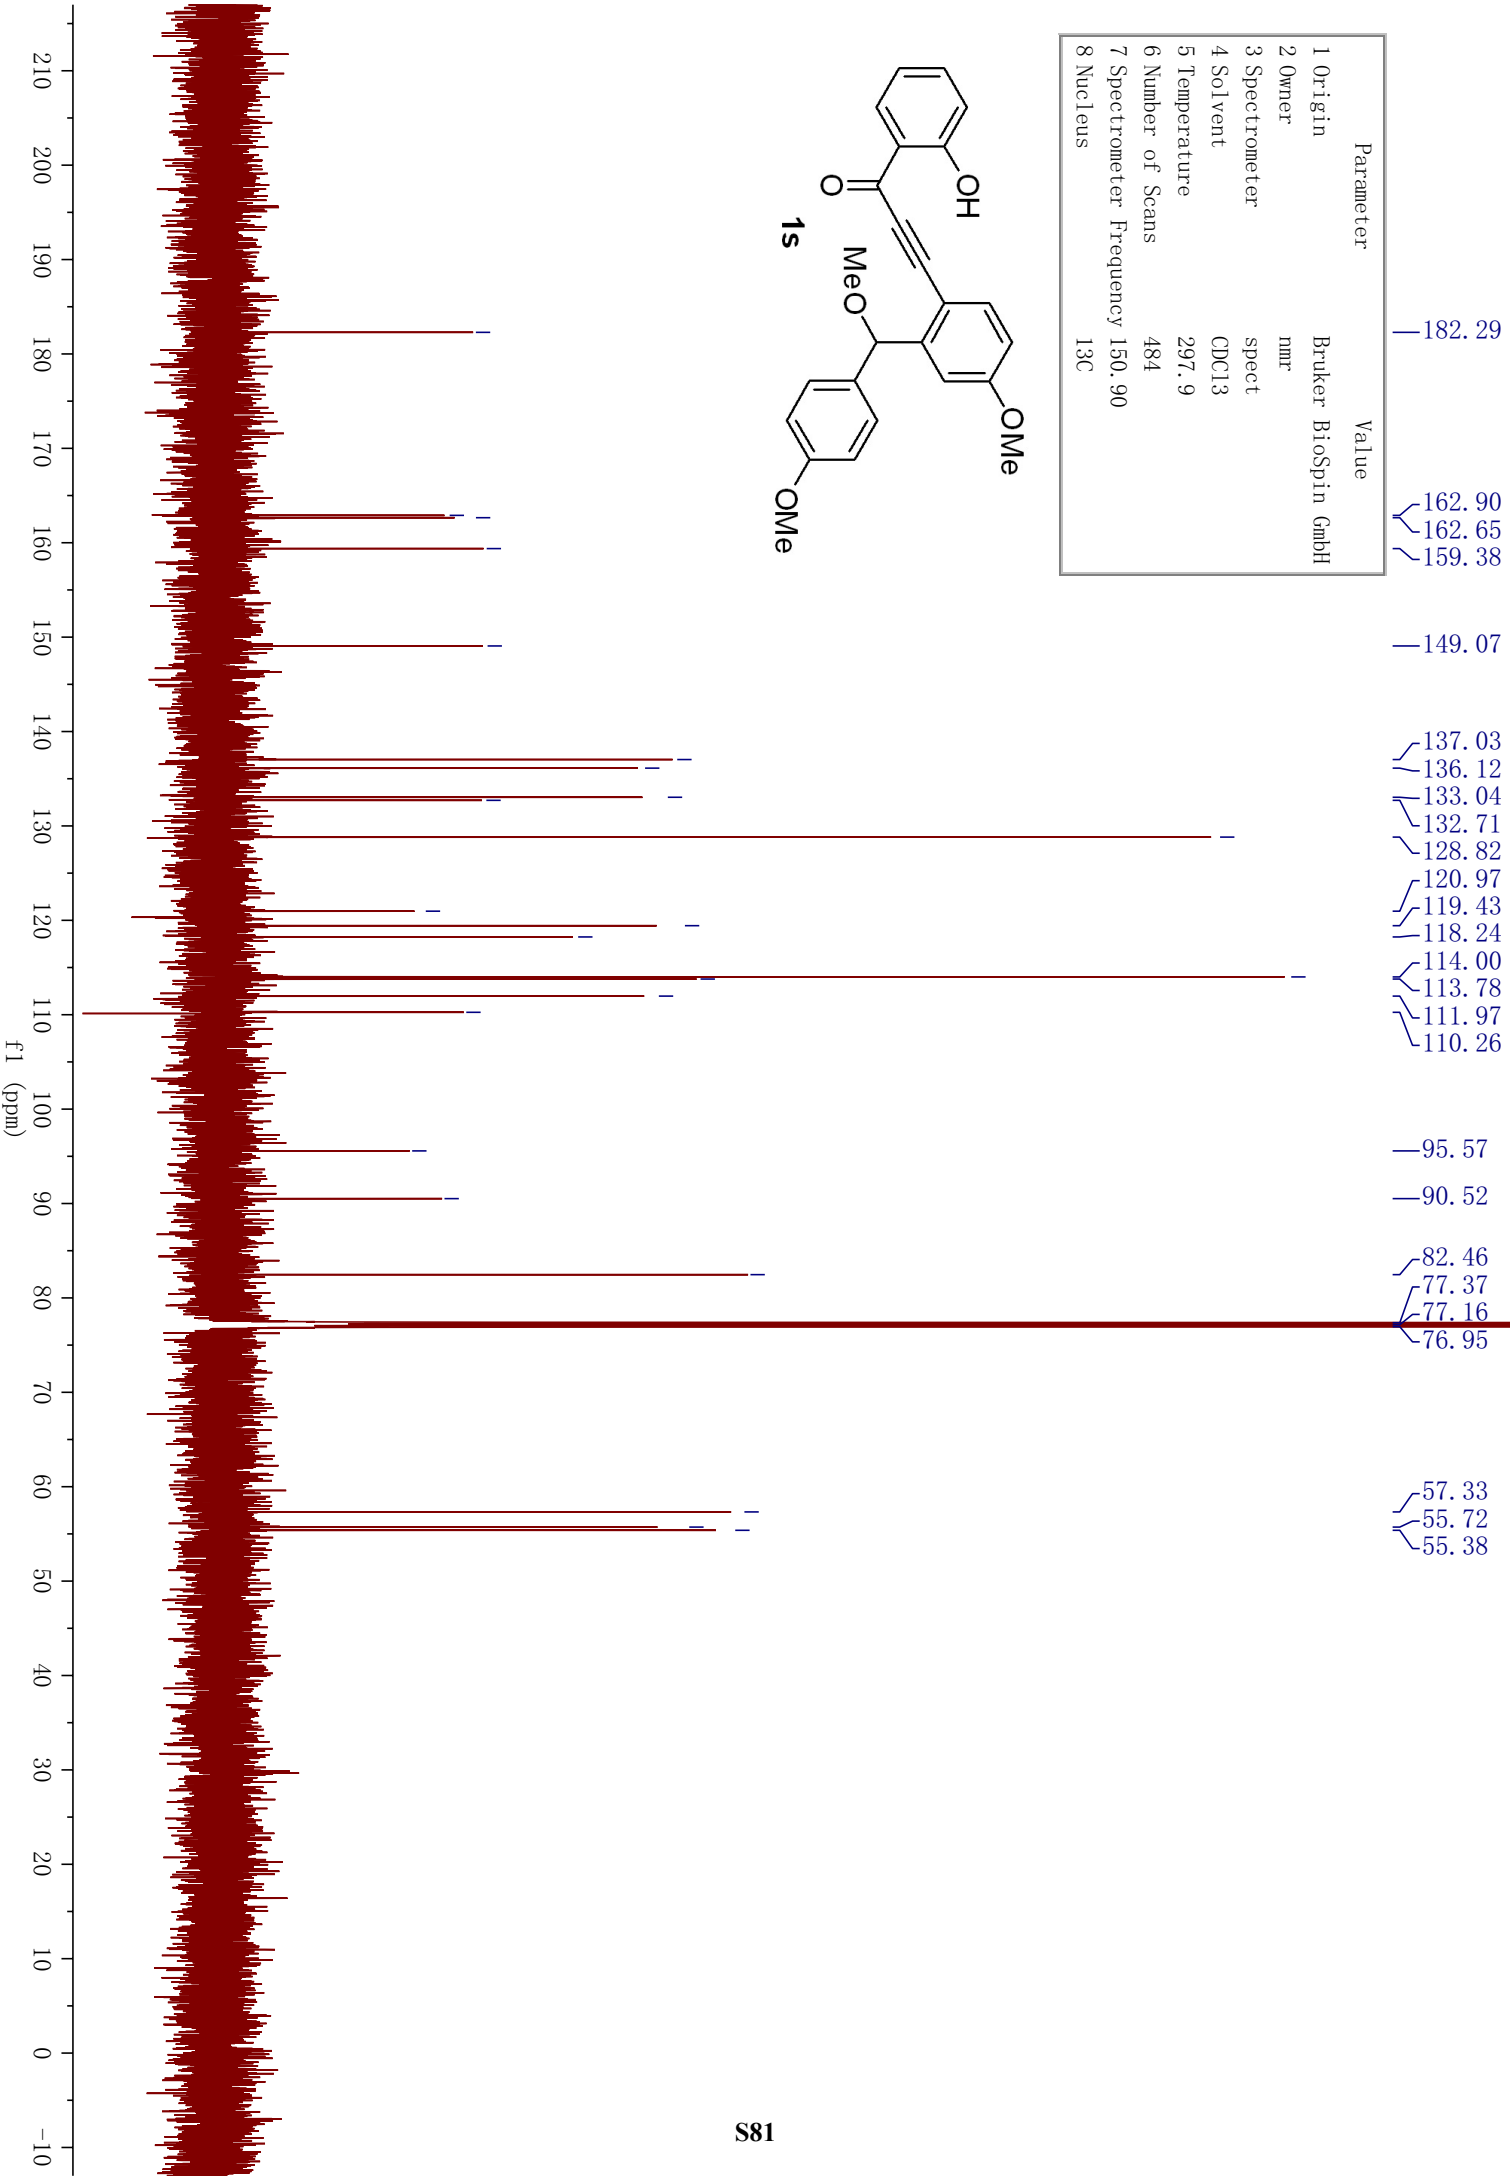

| Parameter                | Value                |
|--------------------------|----------------------|
| 1 Origin                 | Brucker Biospin GmbH |
| 2 Owner                  | nmr                  |
| 3 Spectrometer           | spect                |
| 4 Solvent                | CDCl3                |
| 5 Temperature            | 297.9                |
| 6 Number of Scans        | 16                   |
| 7 Spectrometer Frequency | 600.13               |
| 8 Nucleus                | 1H                   |

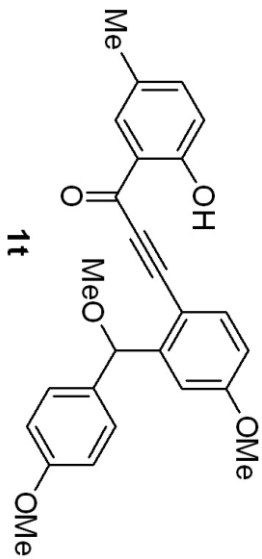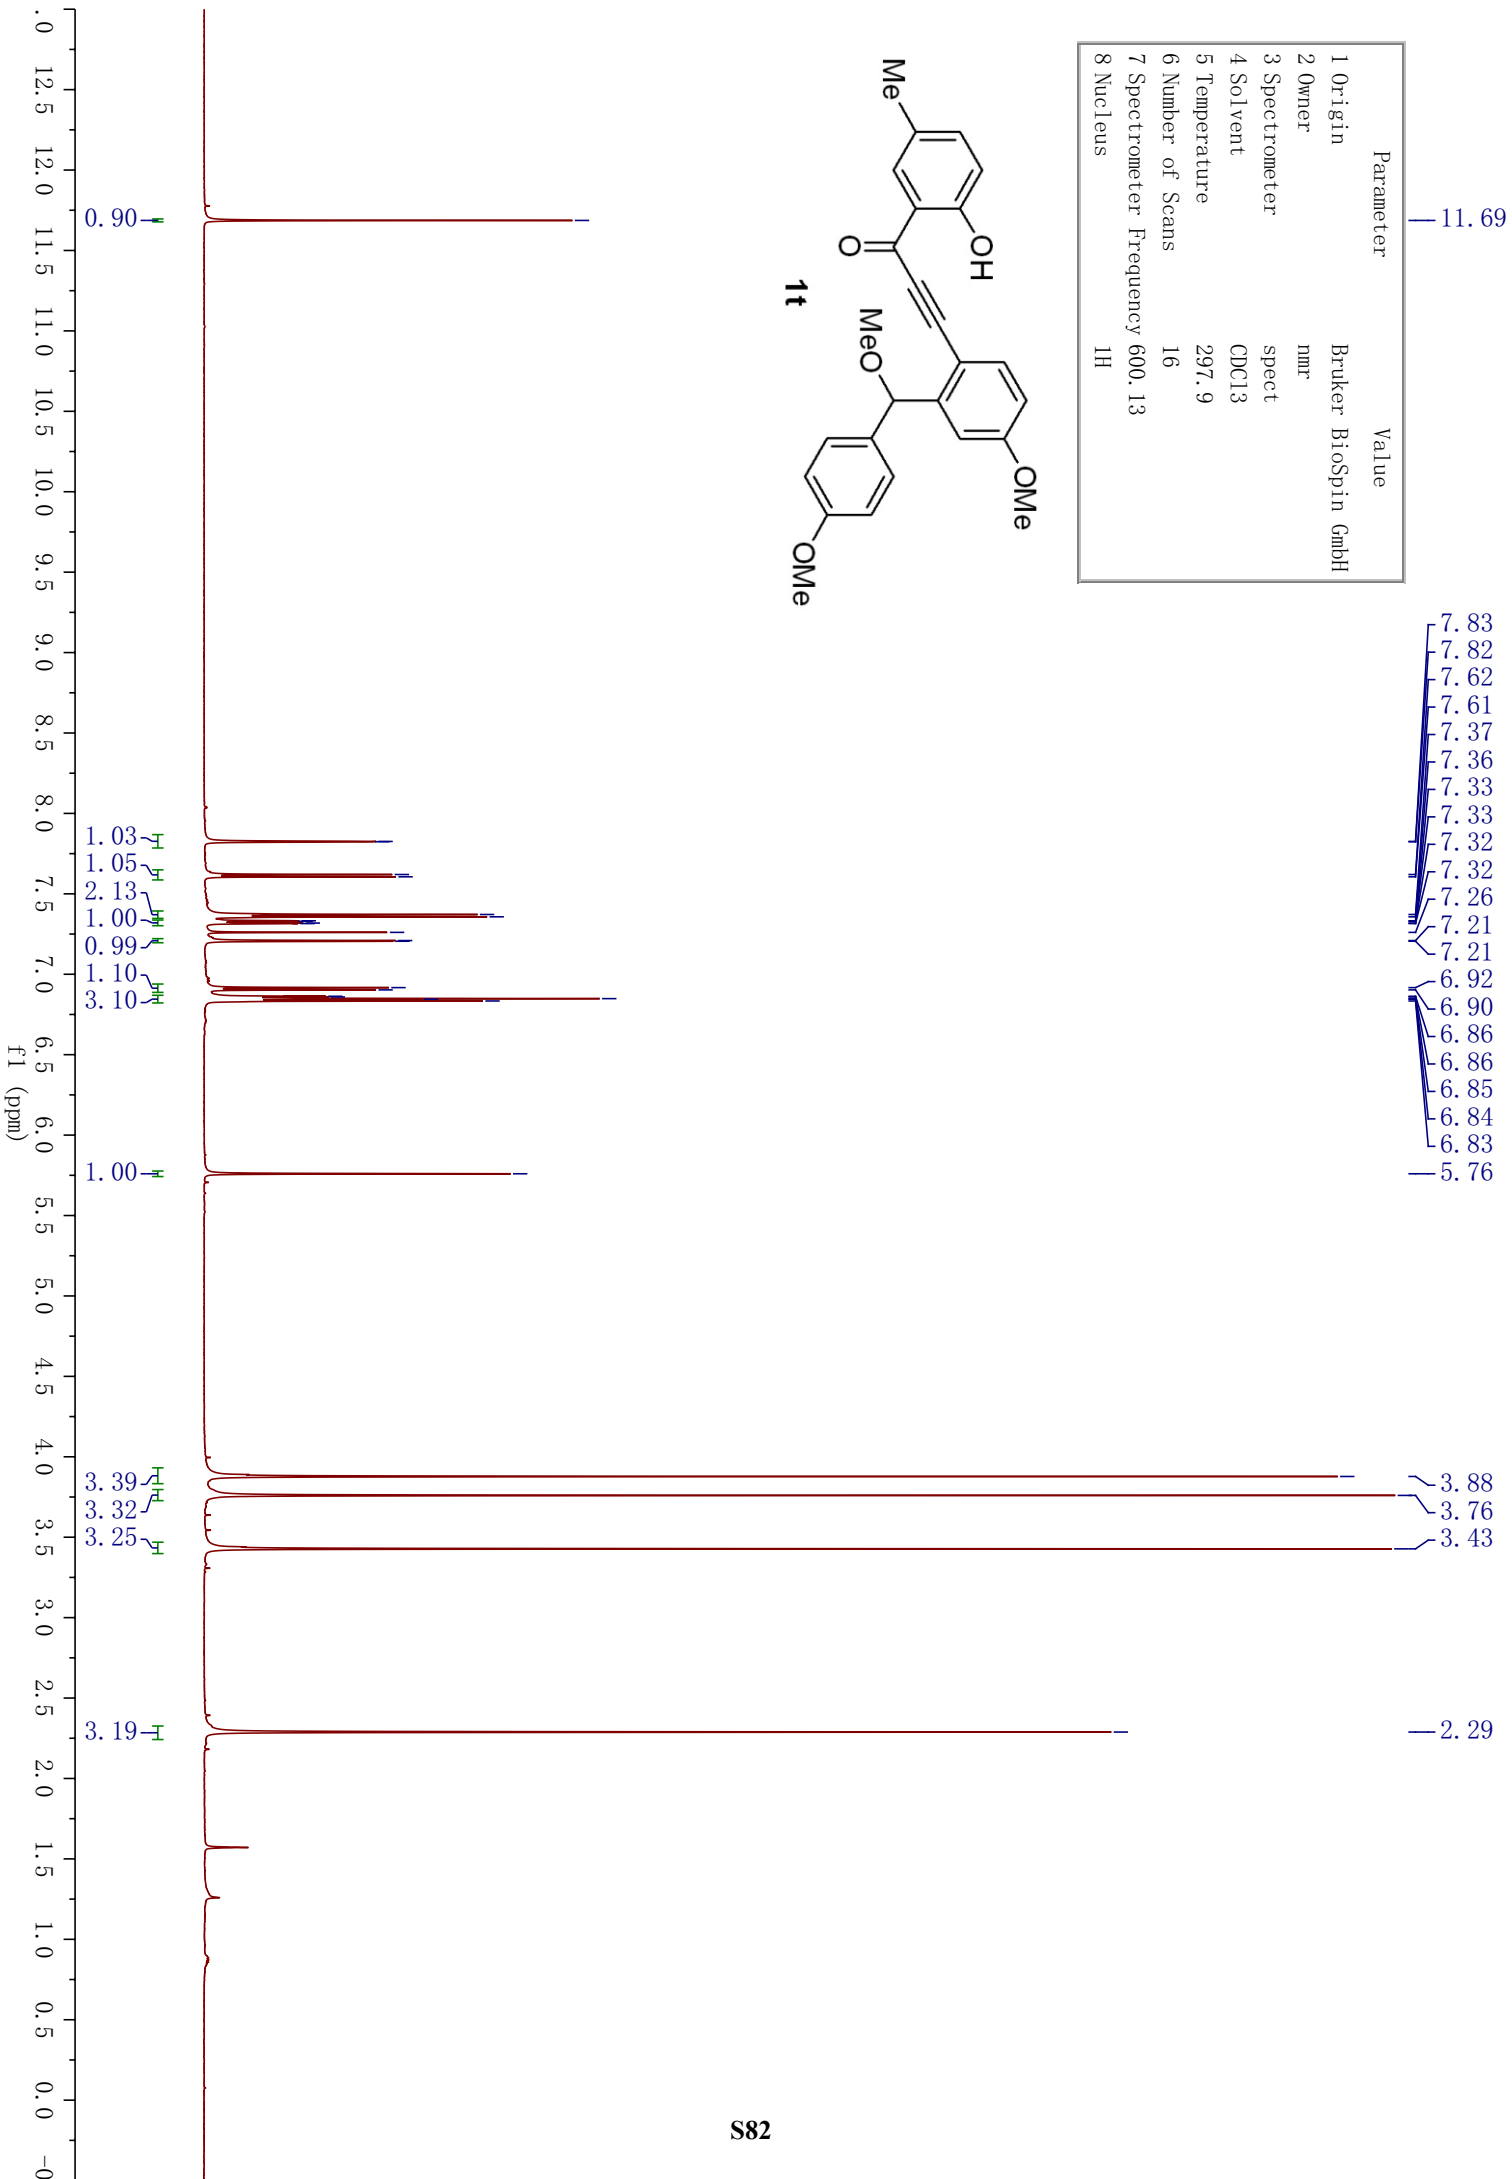

| Parameter                | Value               |
|--------------------------|---------------------|
| 1 Origin                 | Brüker Biospin GmbH |
| 2 Owner                  | nmr                 |
| 3 Spectrometer           | spect               |
| 4 Solvent                | CDCl3               |
| 5 Temperature            | 297.9               |
| 6 Number of Scans        | 343                 |
| 7 Spectrometer Frequency | 150.90              |
| 8 Nucleus                | <sup>13</sup> C     |

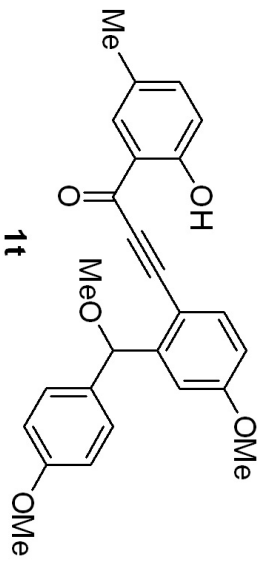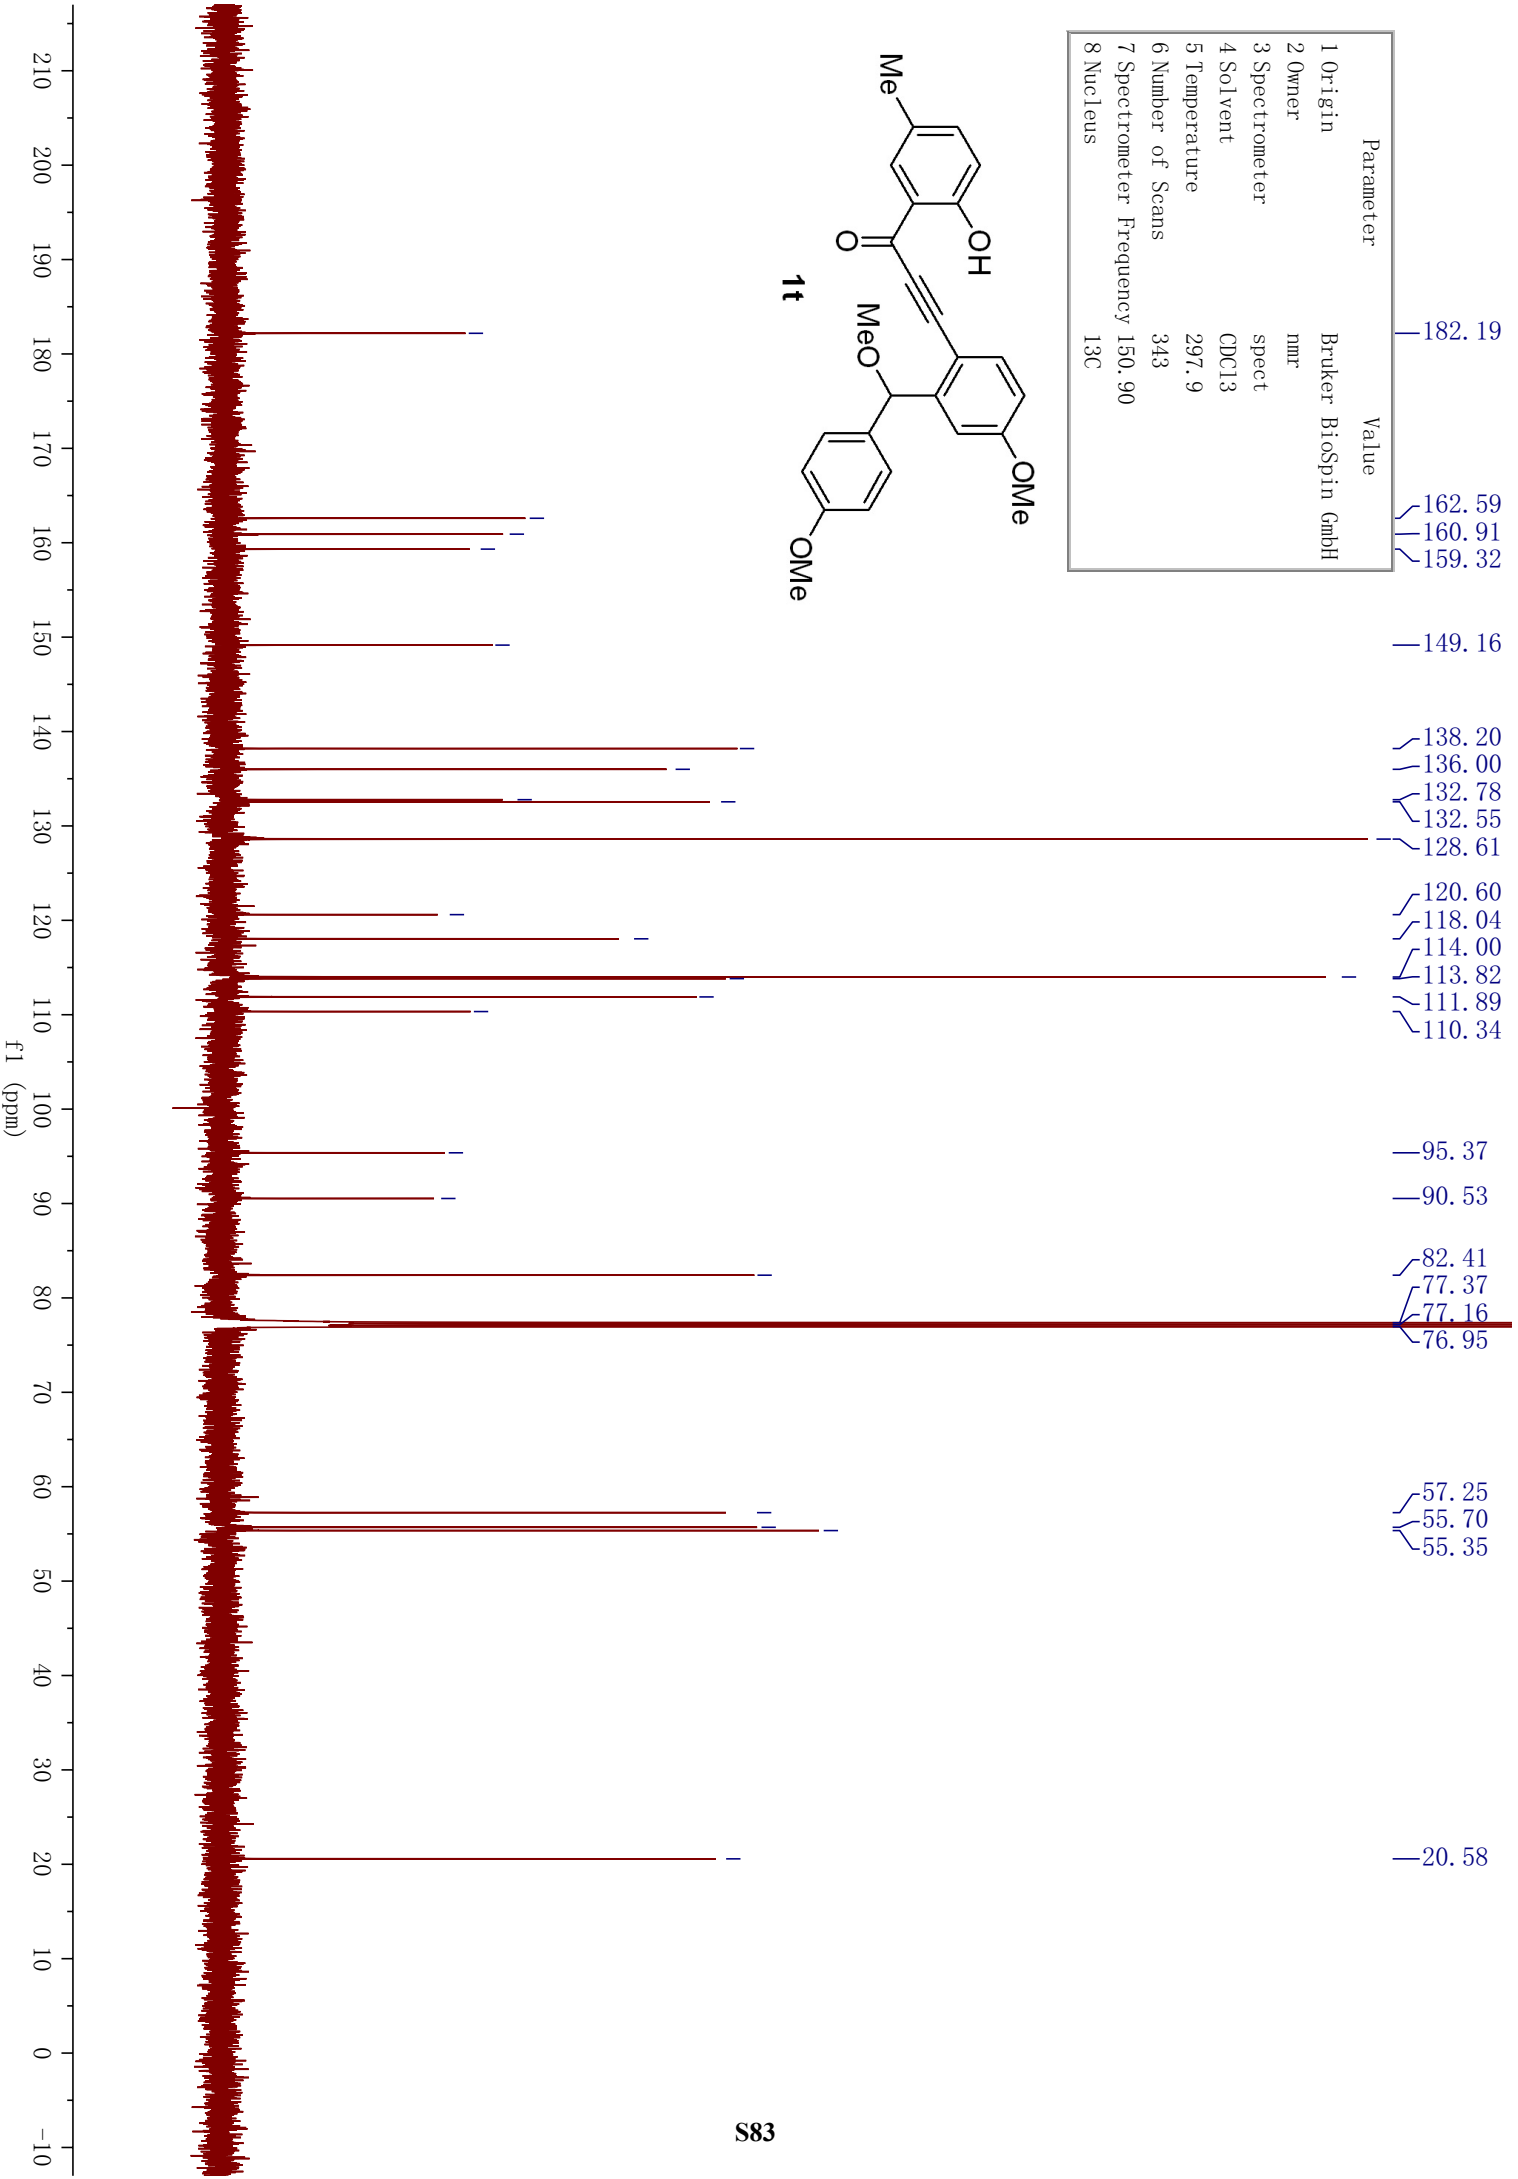



11.98

| Parameter                | Value                |
|--------------------------|----------------------|
| 1 Origin                 | Brucker BioSpin GmbH |
| 2 Owner                  | nmr                  |
| 3 Spectrometer           | spect                |
| 4 Solvent                | CDCl3                |
| 5 Temperature            | 297.9                |
| 6 Number of Scans        | 16                   |
| 7 Spectrometer Frequency | 600.13               |
| 8 Nucleus                | 1H                   |

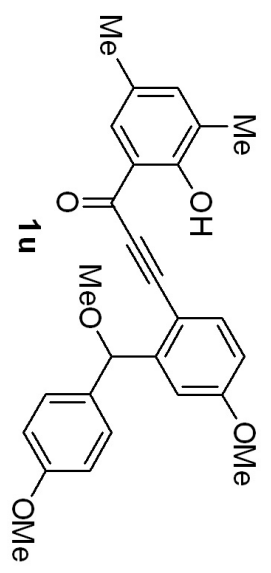

7.68  
7.61  
7.60  
7.37  
7.36  
7.26  
7.21  
7.20  
6.86  
6.85  
6.84  
6.84  
6.83

5.76

3.87  
3.76  
3.42

2.26

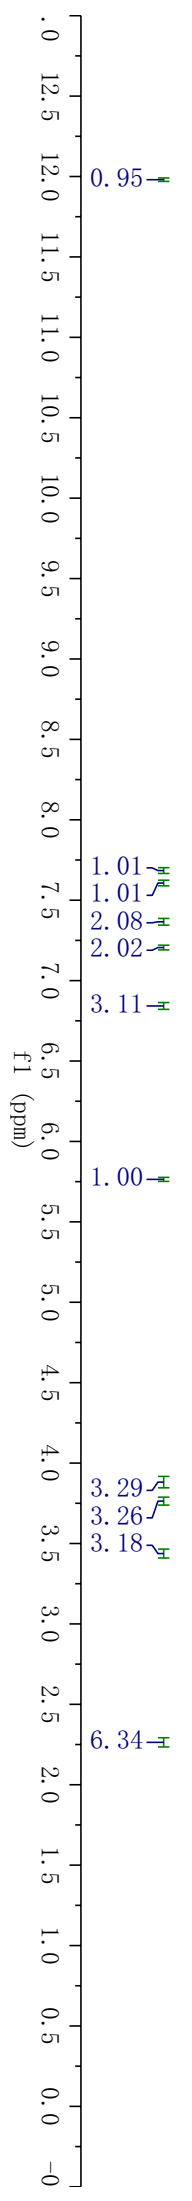

| Parameter                | Value                |
|--------------------------|----------------------|
| 1 Origin                 | Brucker Biospin GmbH |
| 2 Owner                  | nmr                  |
| 3 Spectrometer           | spect                |
| 4 Solvent                | CDCl3                |
| 5 Temperature            | 297.9                |
| 6 Number of Scans        | 567                  |
| 7 Spectrometer Frequency | 150.90               |
| 8 Nucleus                | <sup>13</sup> C      |

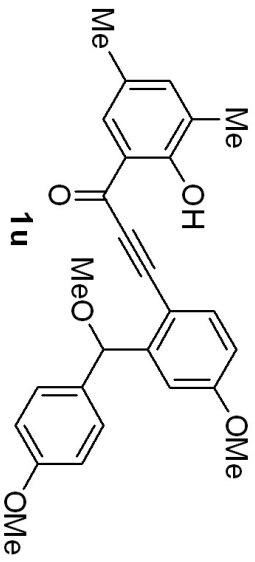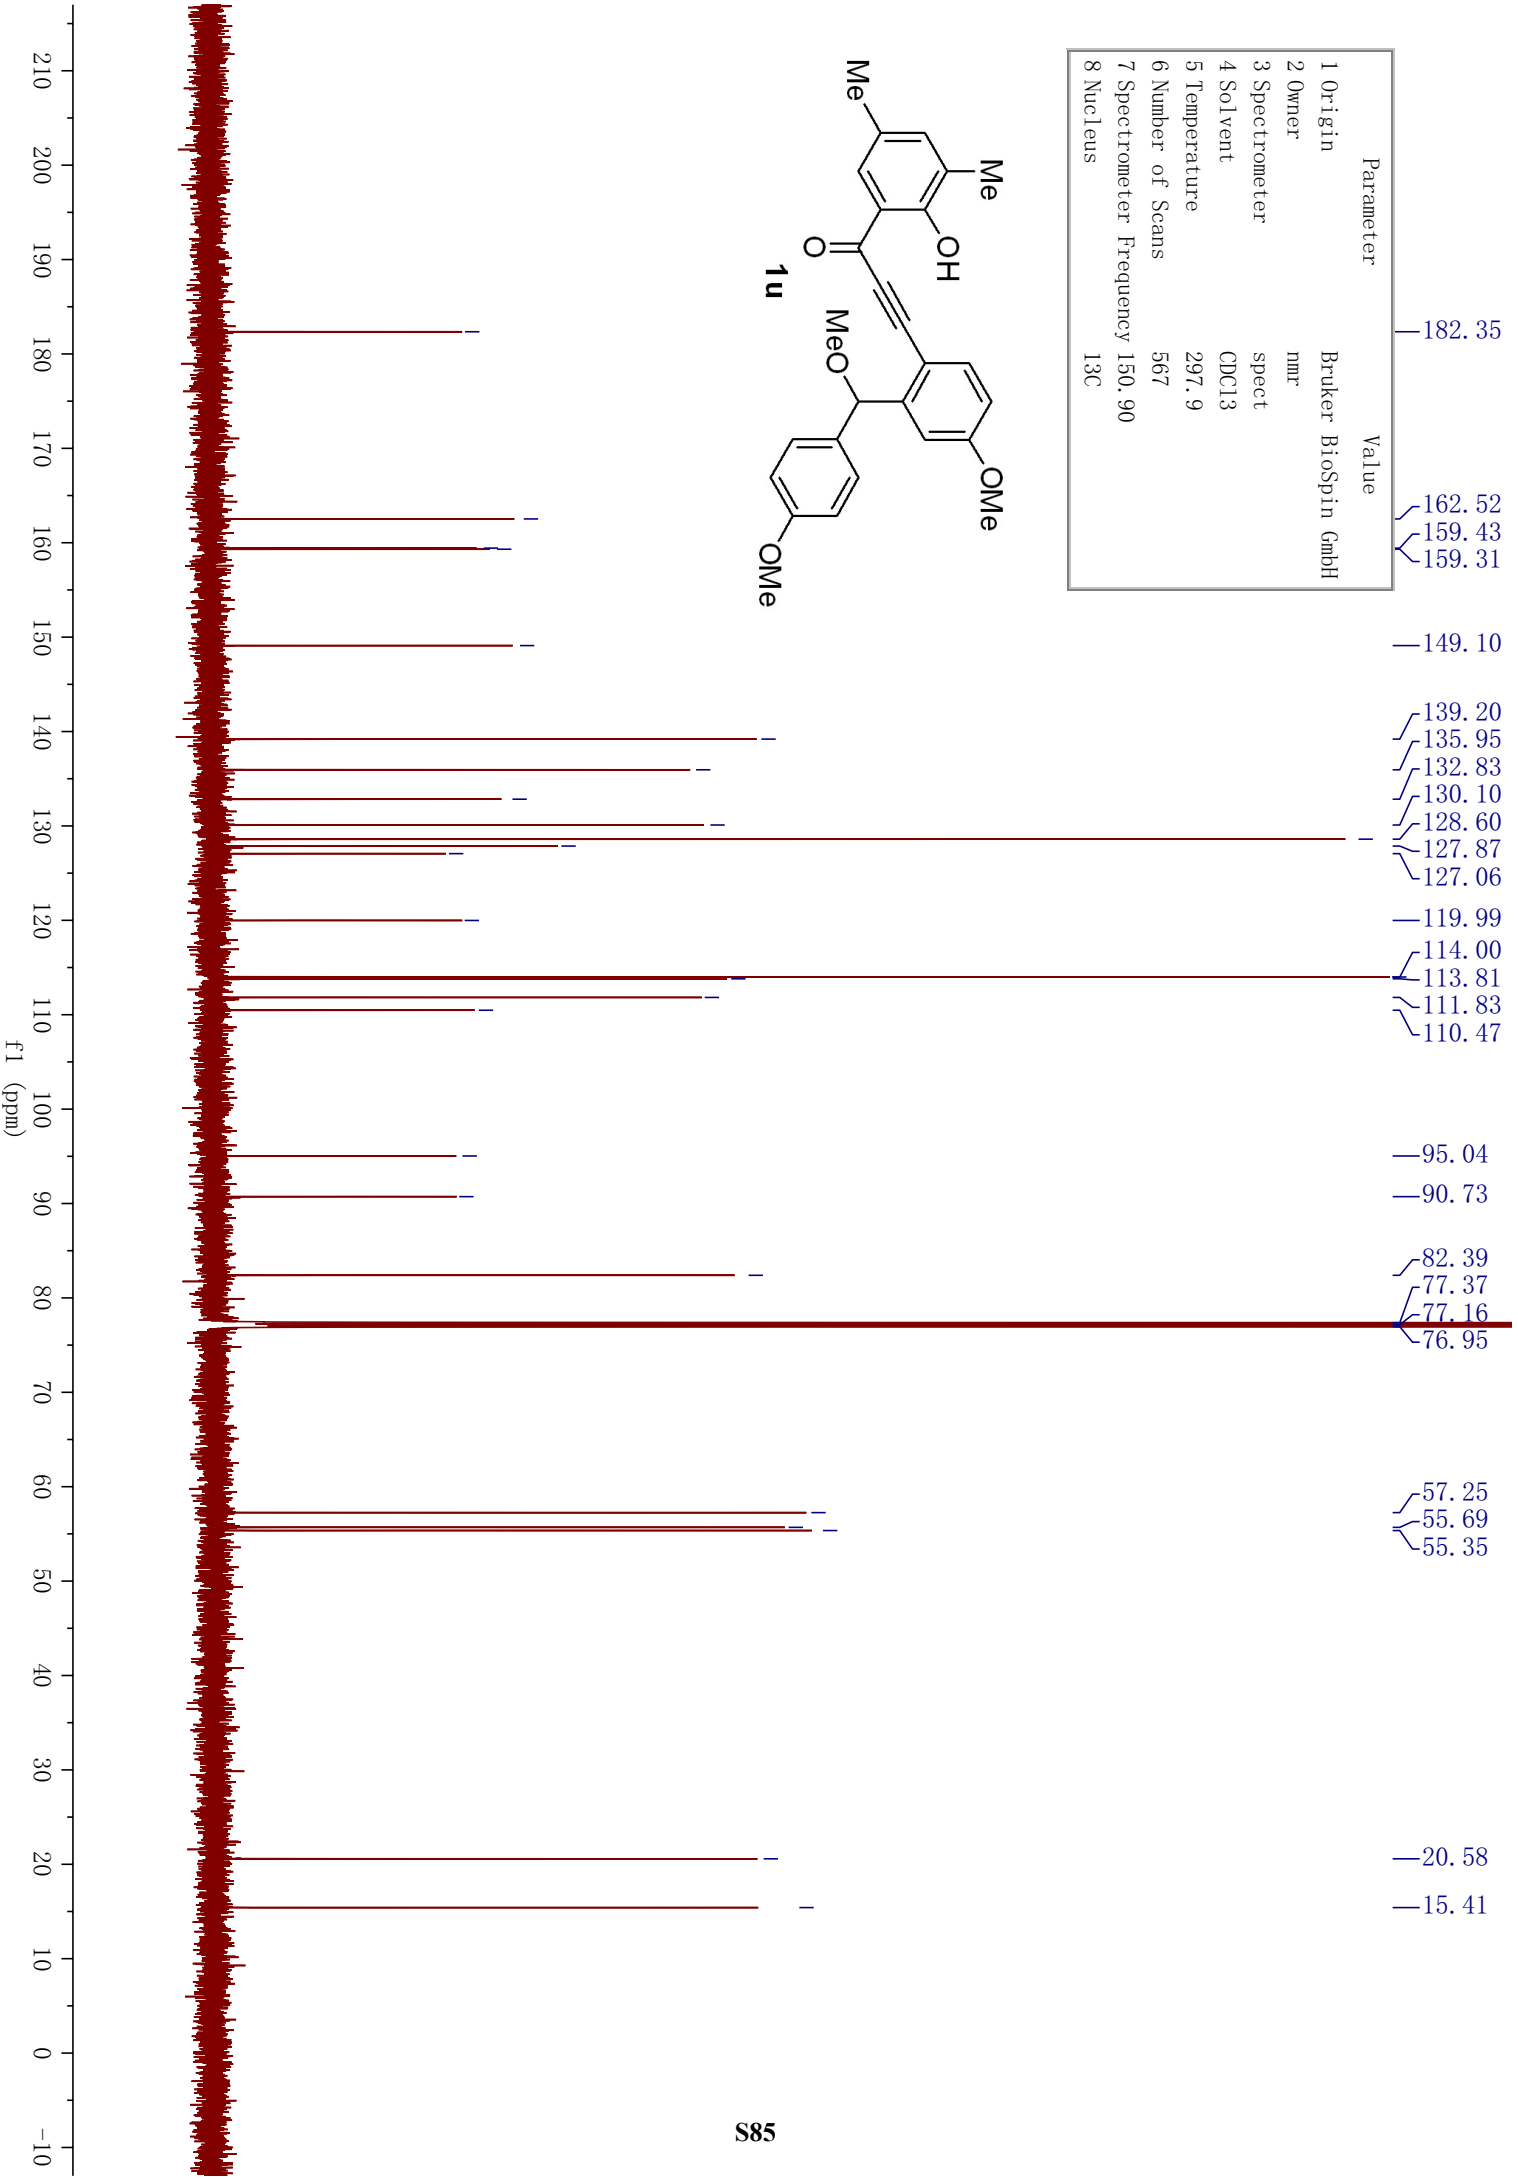

12.32

| Parameter                | Value               |
|--------------------------|---------------------|
| 1 Origin                 | Brüker Biospin GmbH |
| 2 Owner                  | nmr                 |
| 3 Spectrometer           | spect               |
| 4 Solvent                | CDCl3               |
| 5 Temperature            | 297.9               |
| 6 Number of Scans        | 16                  |
| 7 Spectrometer Frequency | 600.13              |
| 8 Nucleus                | <sup>1</sup> H      |

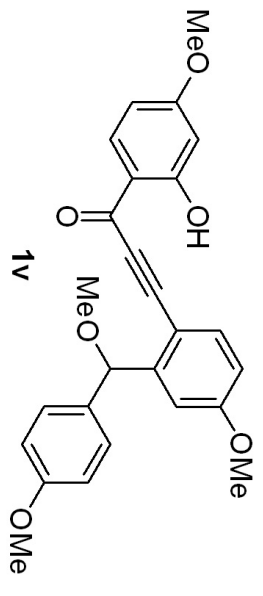

7.83  
7.82  
7.59  
7.58  
7.36  
7.34  
7.26  
7.21  
7.20  
6.86  
6.86  
6.85  
6.85  
6.84  
6.83  
6.83  
6.45  
6.44  
6.43  
6.43  
5.72

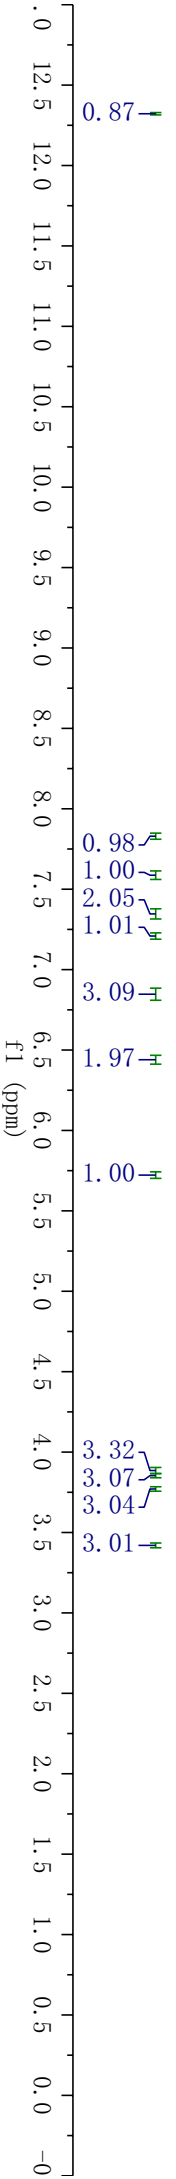

3.87  
3.86  
3.77  
3.42

| Parameter                | Value               |
|--------------------------|---------------------|
| 1 Origin                 | Bruker Biospin GmbH |
| 2 Owner                  | nmr                 |
| 3 Spectrometer           | spect               |
| 4 Solvent                | CDCl3               |
| 5 Temperature            | 297.9               |
| 6 Number of Scans        | 157                 |
| 7 Spectrometer Frequency | 150.90              |
| 8 Nucleus                | <sup>13</sup> C     |

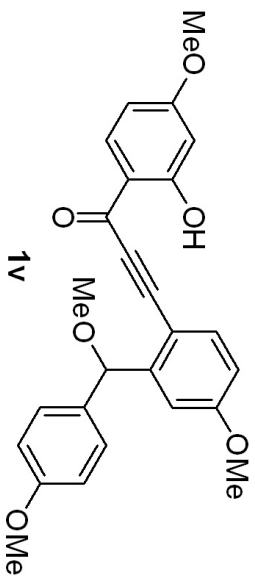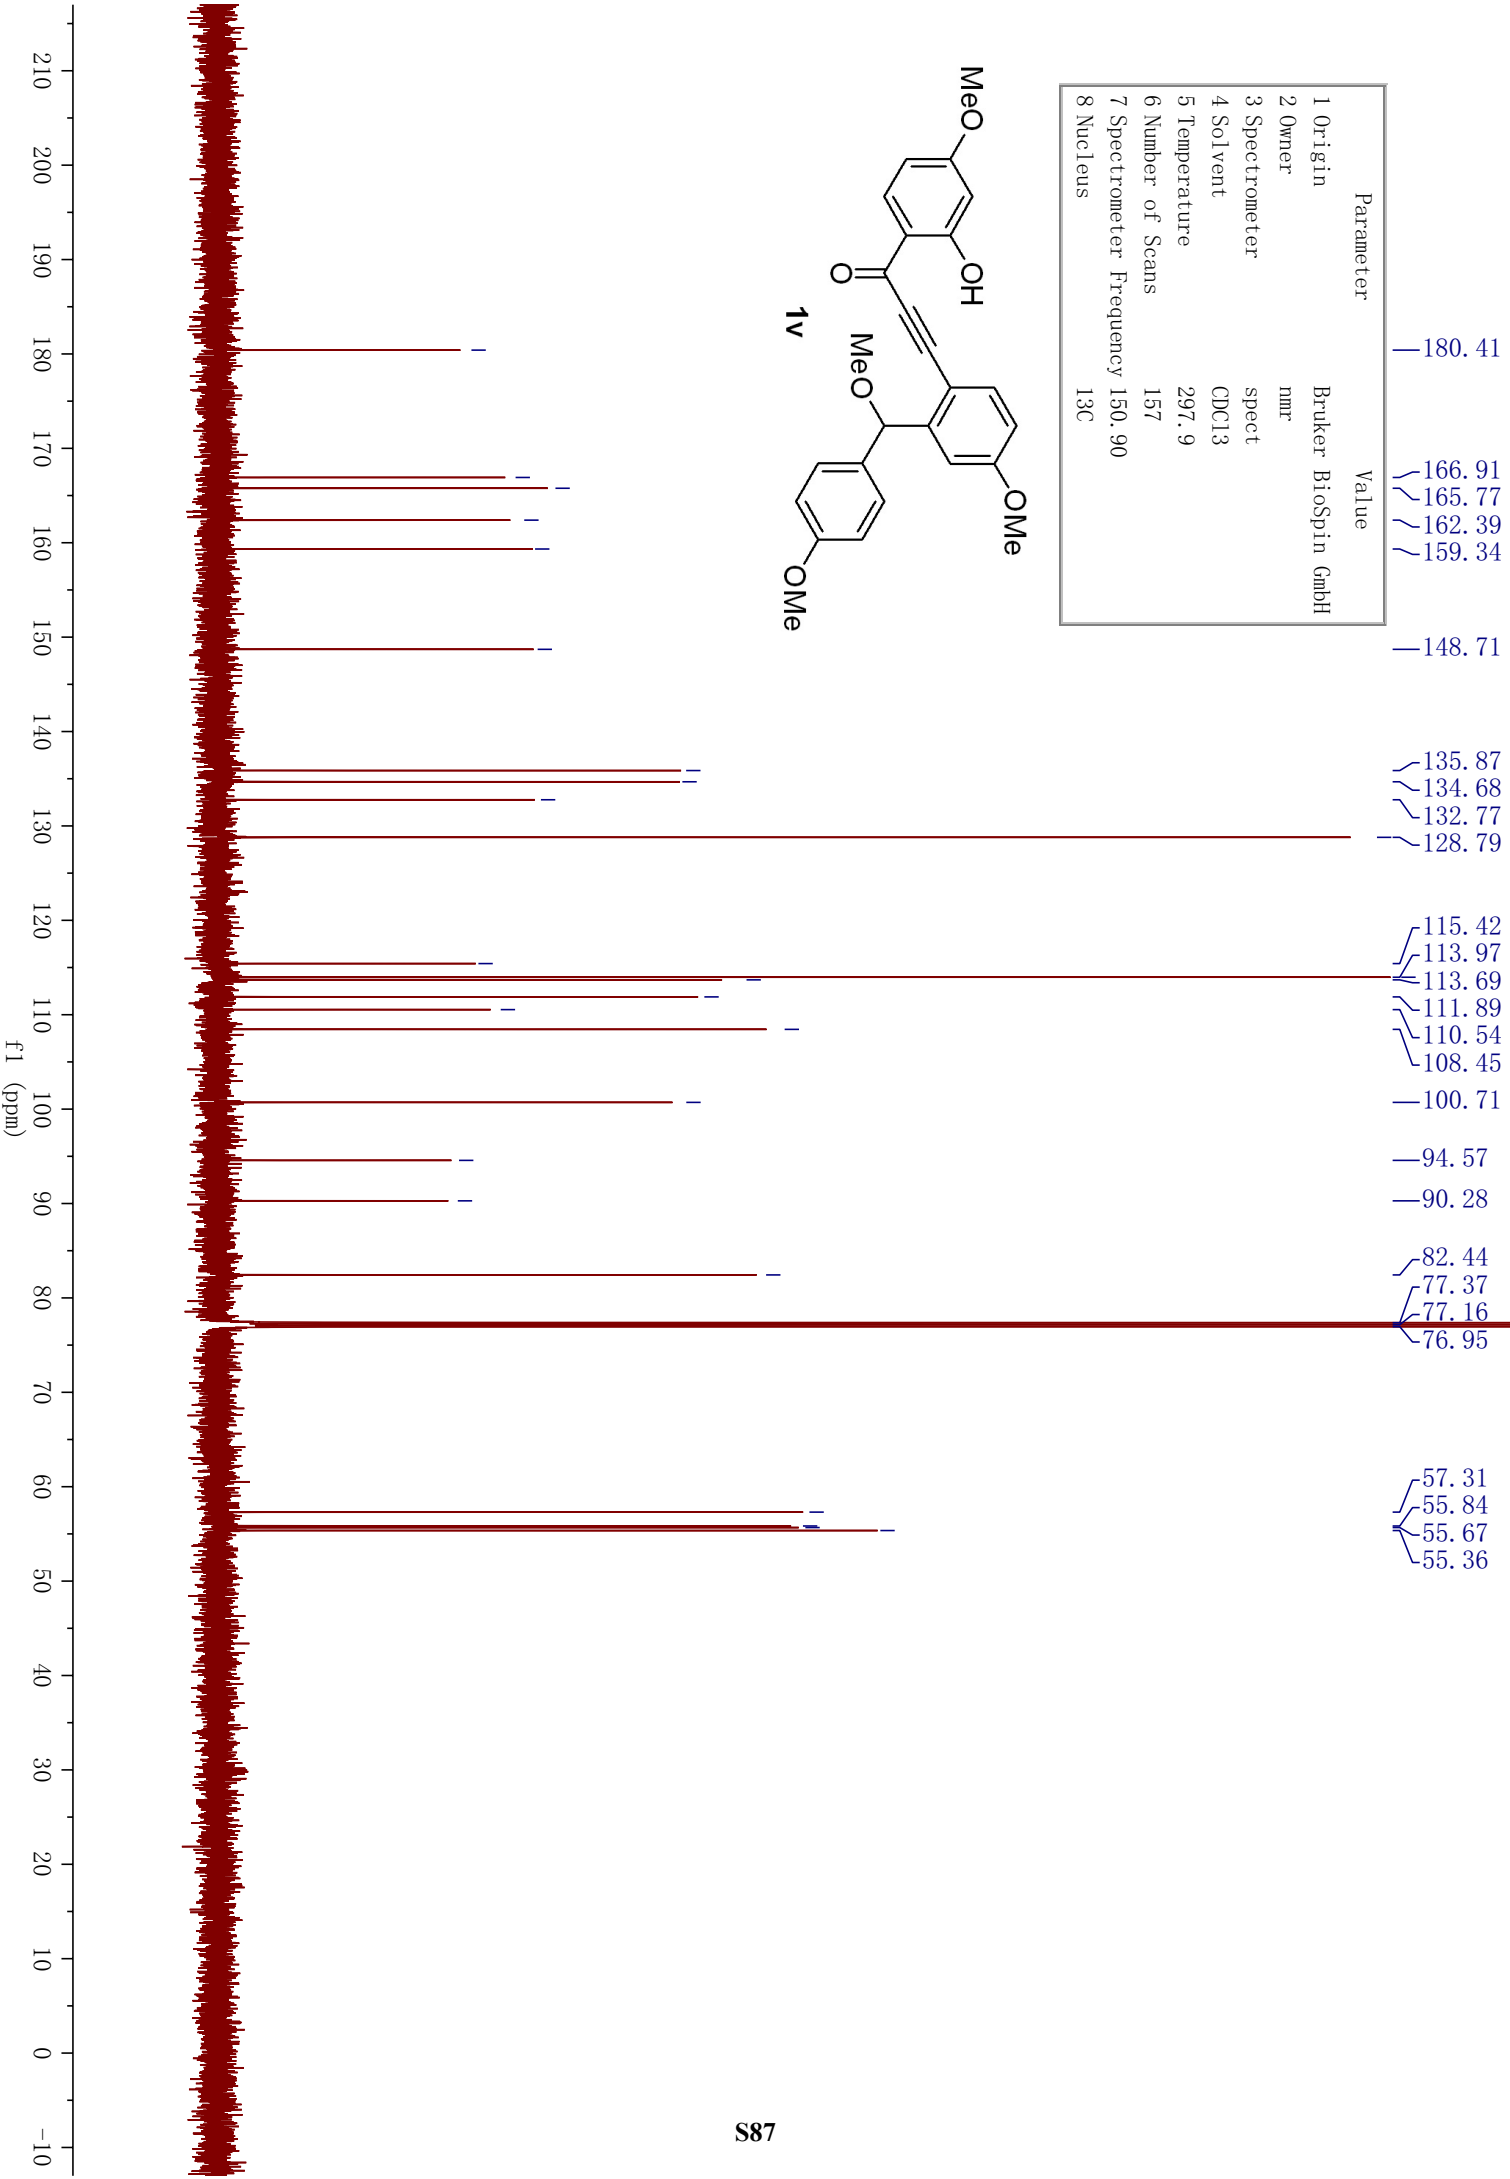

11.78

| Parameter                | Value               |
|--------------------------|---------------------|
| 1 Origin                 | Bruker Biospin GmbH |
| 2 Owner                  | nmr                 |
| 3 Spectrometer           | spect               |
| 4 Solvent                | CDCl3               |
| 5 Temperature            | 297.9               |
| 6 Number of Scans        | 16                  |
| 7 Spectrometer Frequency | 600.13              |
| 8 Nucleus                | <sup>1</sup> H      |

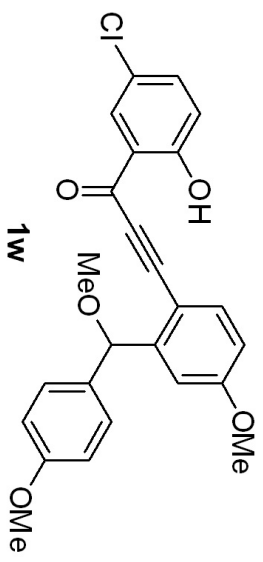

8.04  
8.03  
7.64  
7.62  
7.35  
7.34  
7.26  
7.23  
7.23  
6.97  
6.96  
6.86  
6.85  
6.84  
5.70

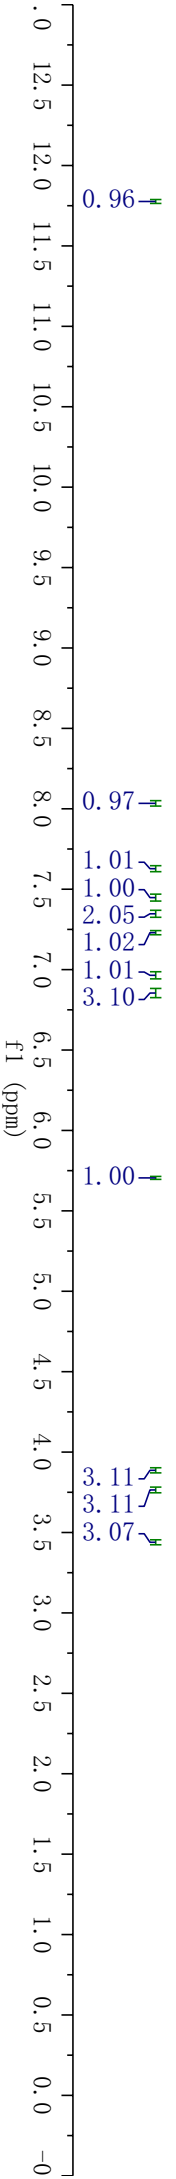

3.89  
3.76  
3.44

| Parameter                | Value               |
|--------------------------|---------------------|
| 1 Origin                 | Bruker Biospin GmbH |
| 2 Owner                  | nmr                 |
| 3 Spectrometer           | spect               |
| 4 Solvent                | CDCl3               |
| 5 Temperature            | 297.9               |
| 6 Number of Scans        | 516                 |
| 7 Spectrometer Frequency | 150.90              |
| 8 Nucleus                | <sup>13</sup> C     |

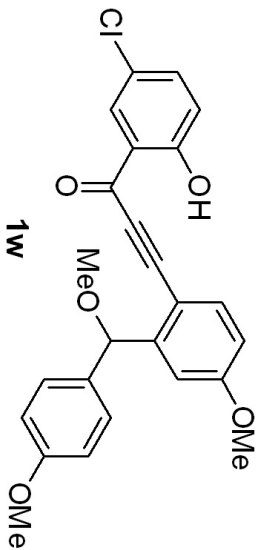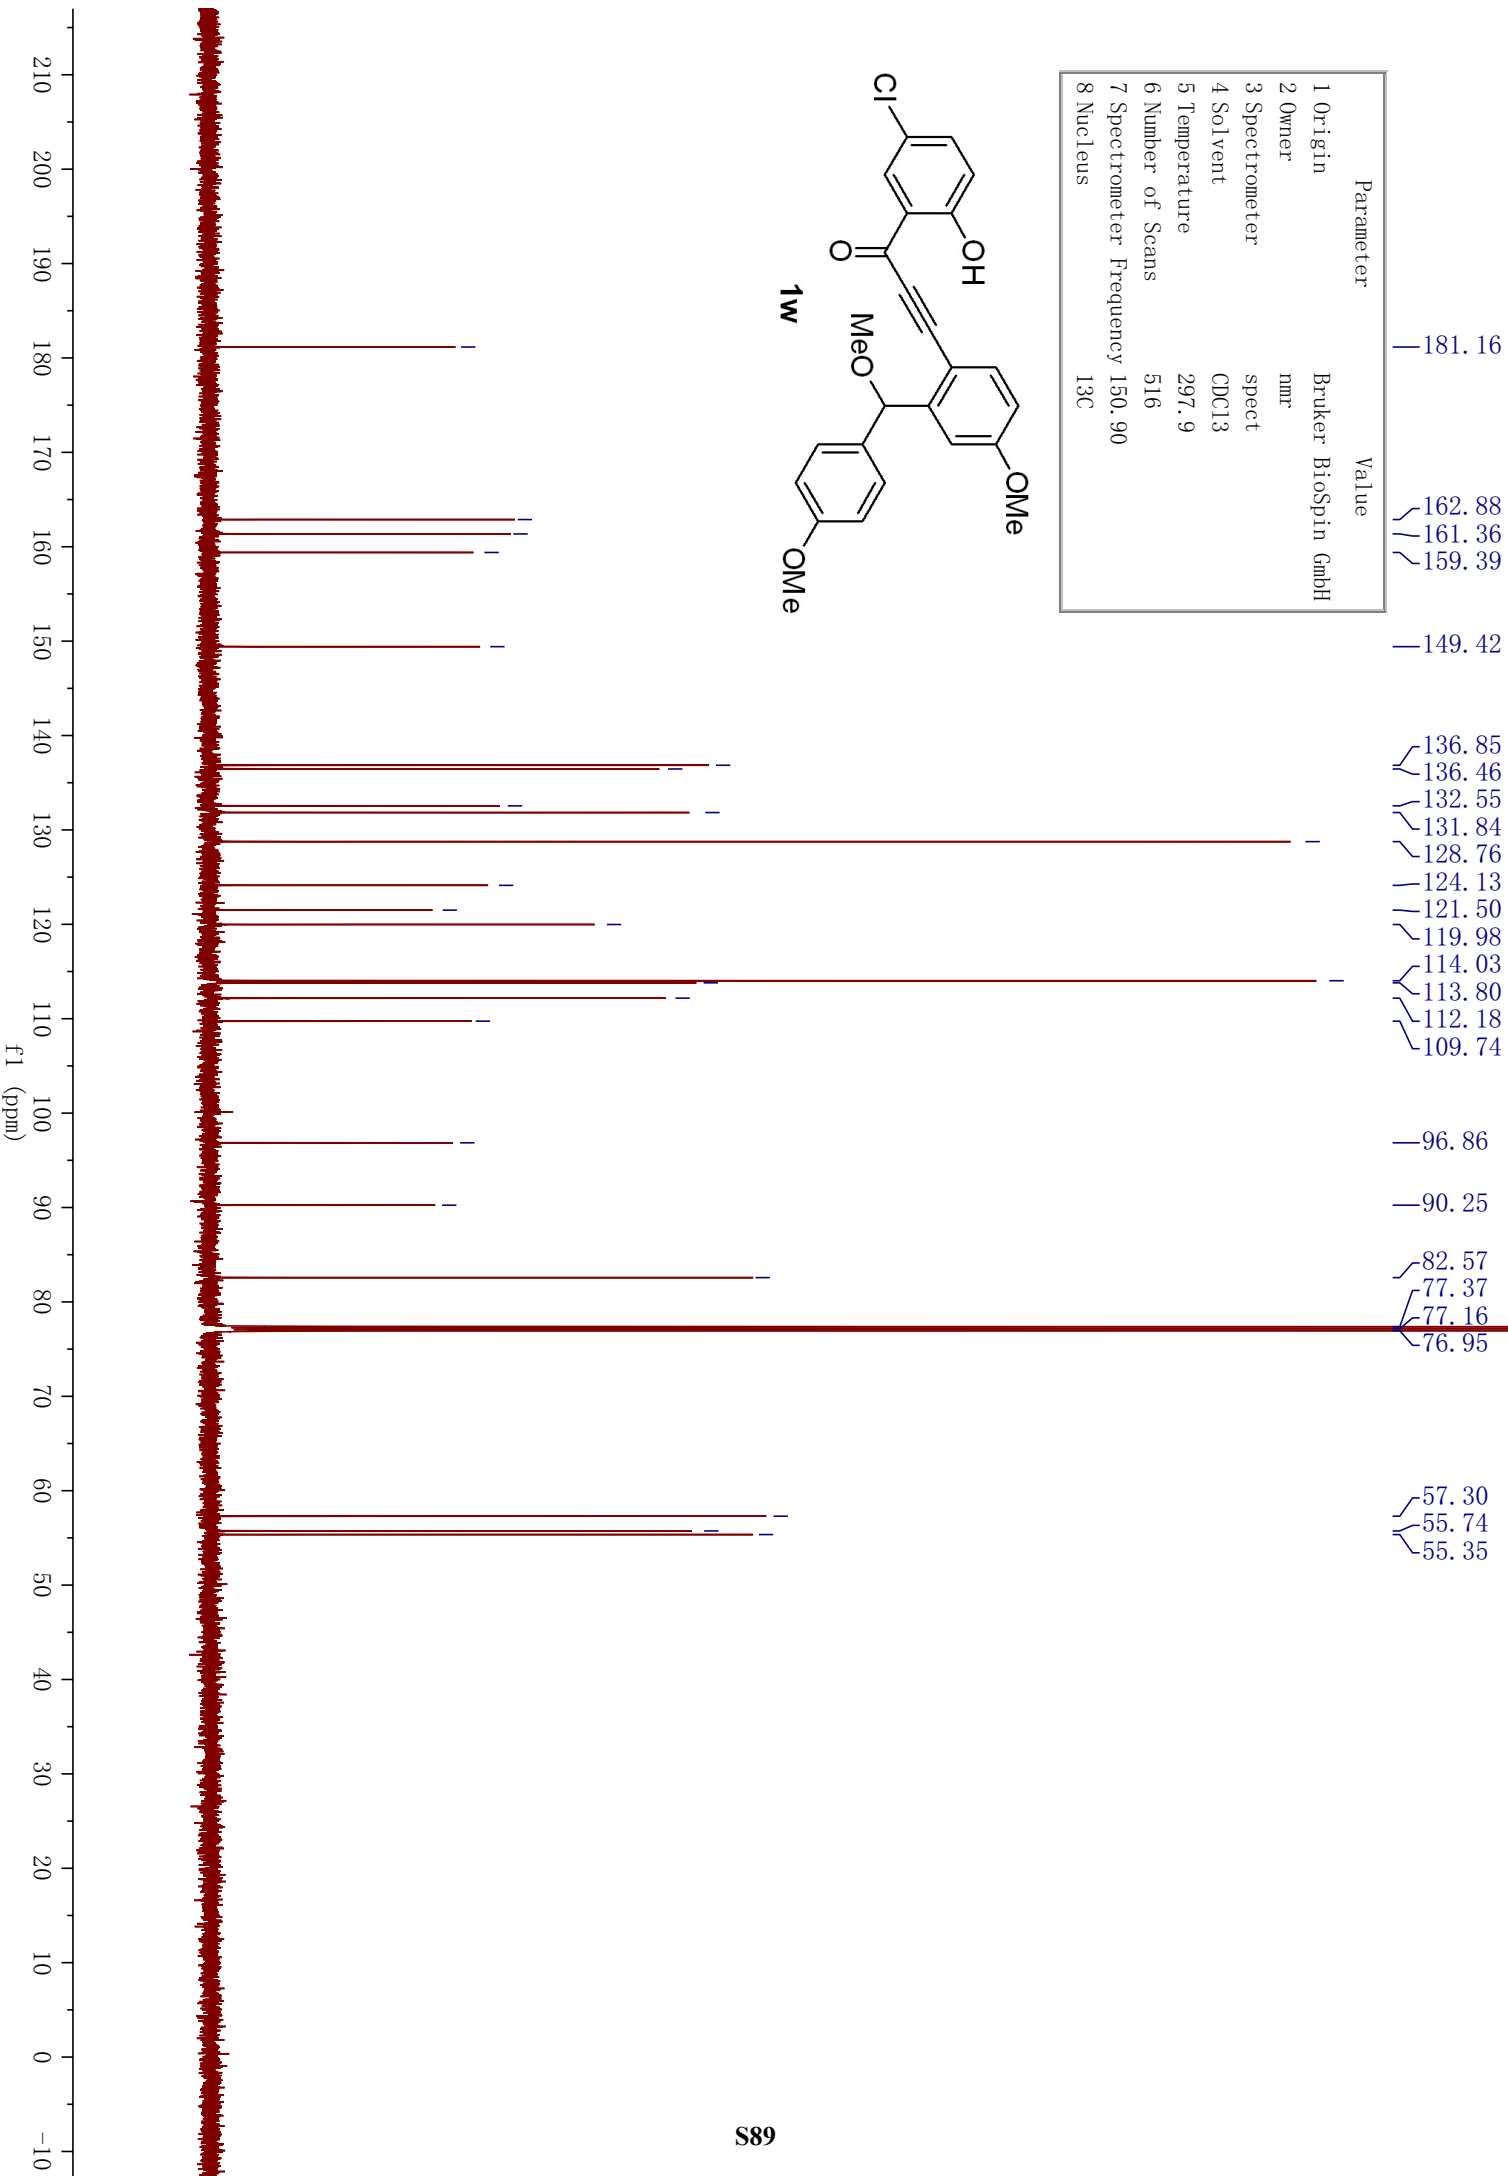

| Parameter                | Value                |
|--------------------------|----------------------|
| 1 Origin                 | Brucker Biospin GmbH |
| 2 Owner                  | nmr                  |
| 3 Spectrometer           | spect                |
| 4 Solvent                | CDCl3                |
| 5 Temperature            | 297.9                |
| 6 Number of Scans        | 16                   |
| 7 Spectrometer Frequency | 600.13               |
| 8 Nucleus                | <sup>1</sup> H       |

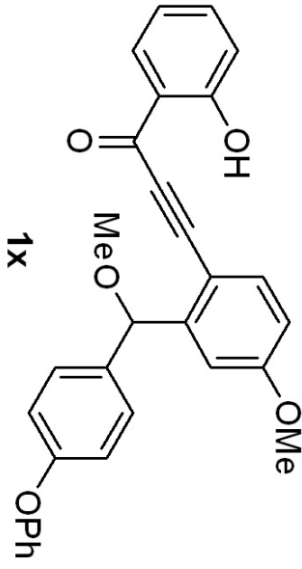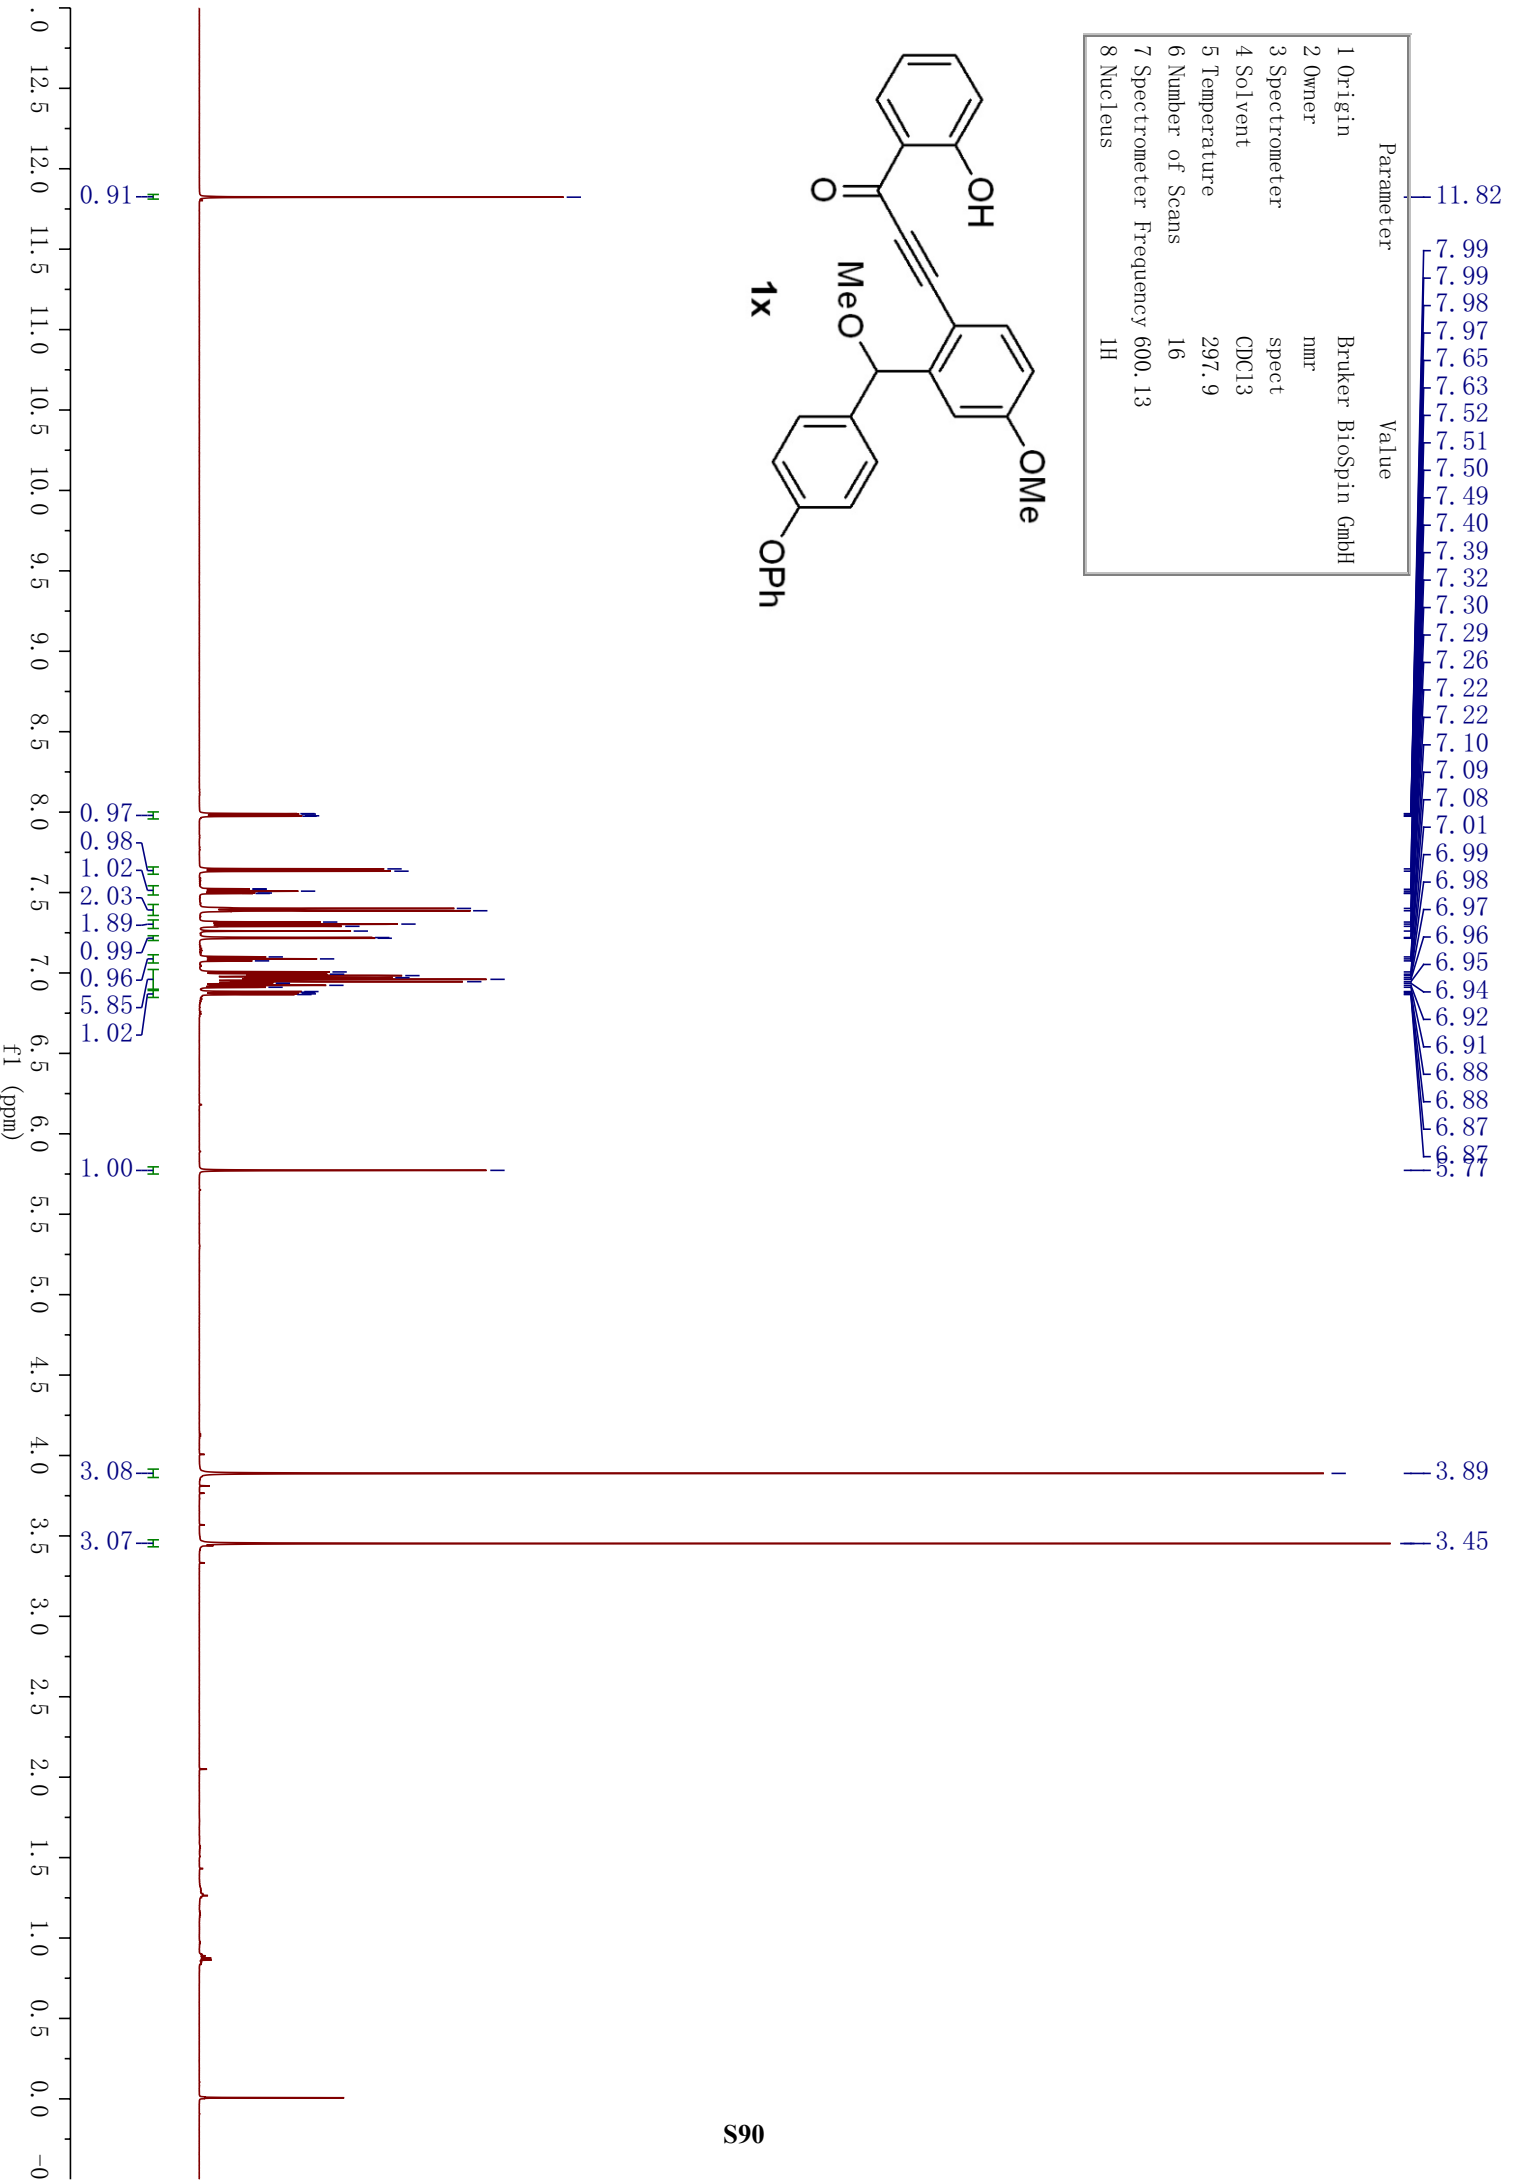

| Parameter                | Value                |
|--------------------------|----------------------|
| 1 Origin                 | Brucker BioSpin GmbH |
| 2 Owner                  | nmr                  |
| 3 Spectrometer           | spect                |
| 4 Solvent                | CDCl3                |
| 5 Temperature            | 297.9                |
| 6 Number of Scans        | 102                  |
| 7 Spectrometer Frequency | 150.90               |
| 8 Nucleus                | <sup>13</sup> C      |

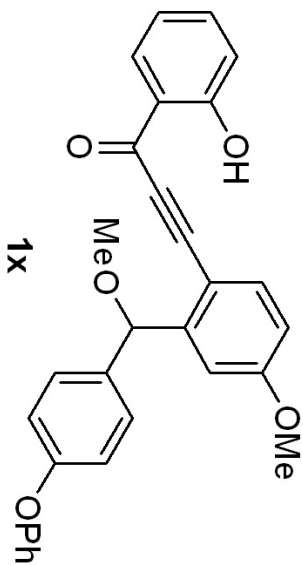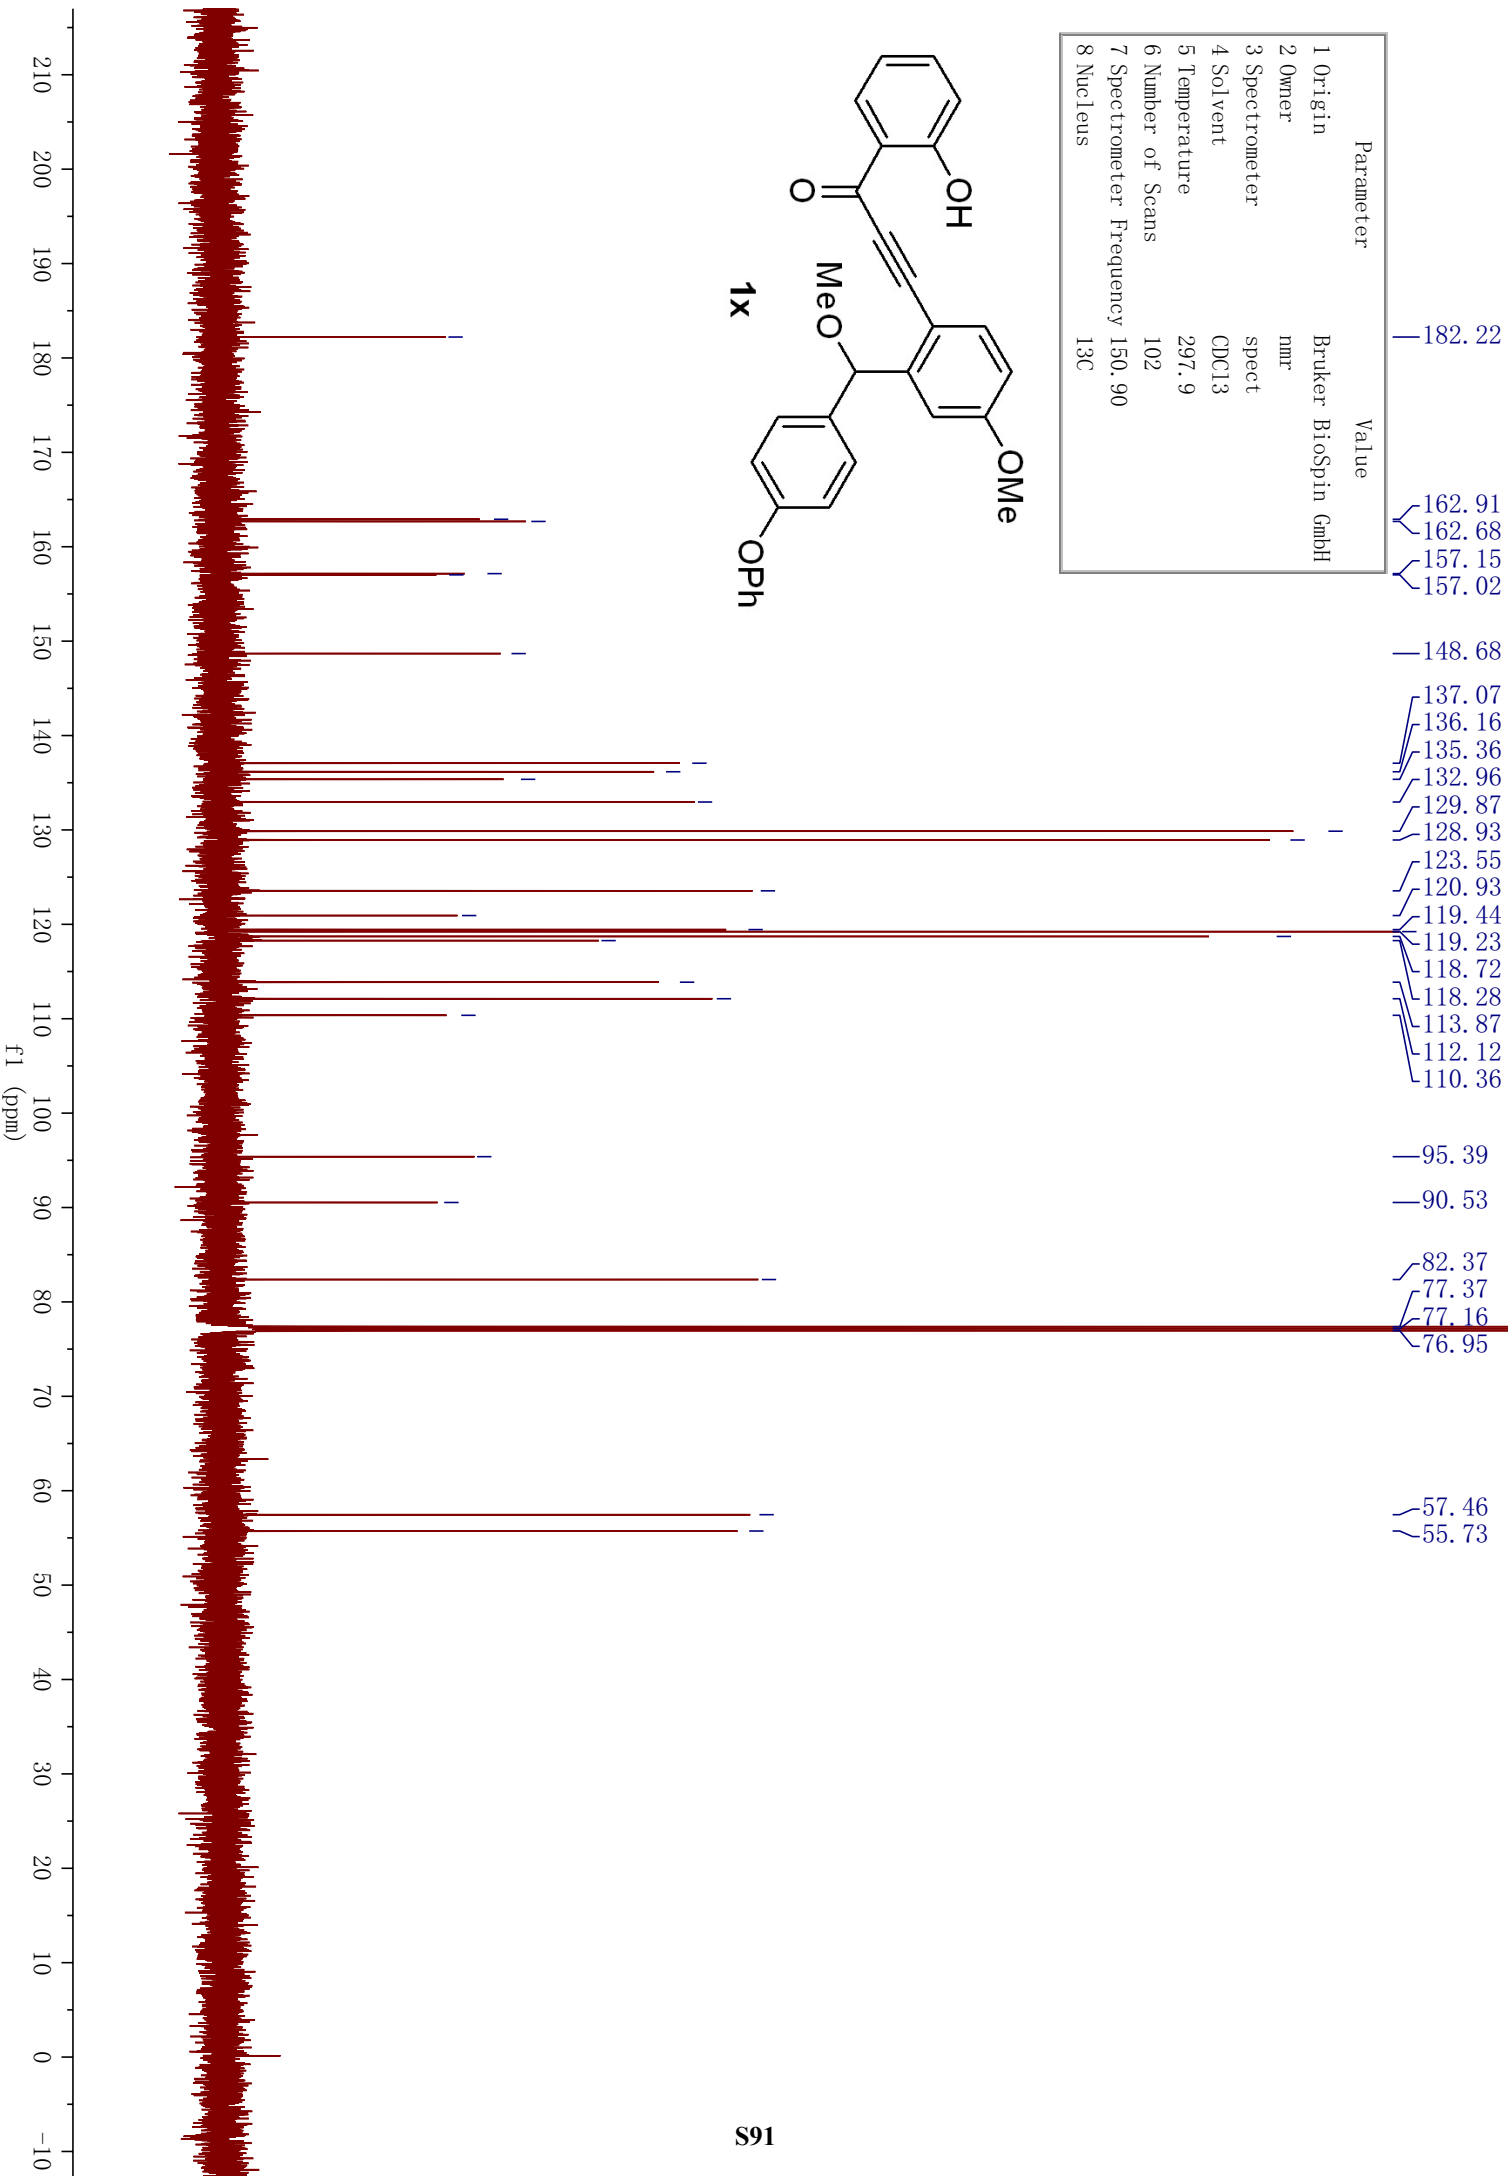



| Parameter                | Value               |
|--------------------------|---------------------|
| 1 Origin                 | Bruker Biospin GmbH |
| 2 Owner                  | nmr                 |
| 3 Spectrometer           | spect               |
| 4 Solvent                | CDCl3               |
| 5 Temperature            | 297.9               |
| 6 Number of Scans        | 16                  |
| 7 Spectrometer Frequency | 600.13              |
| 8 Nucleus                | <sup>1</sup> H      |

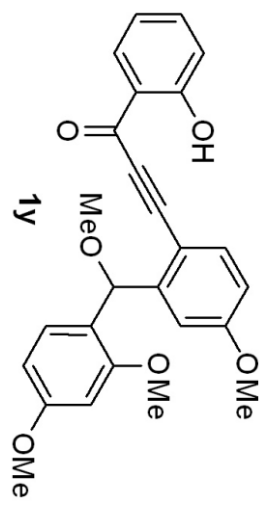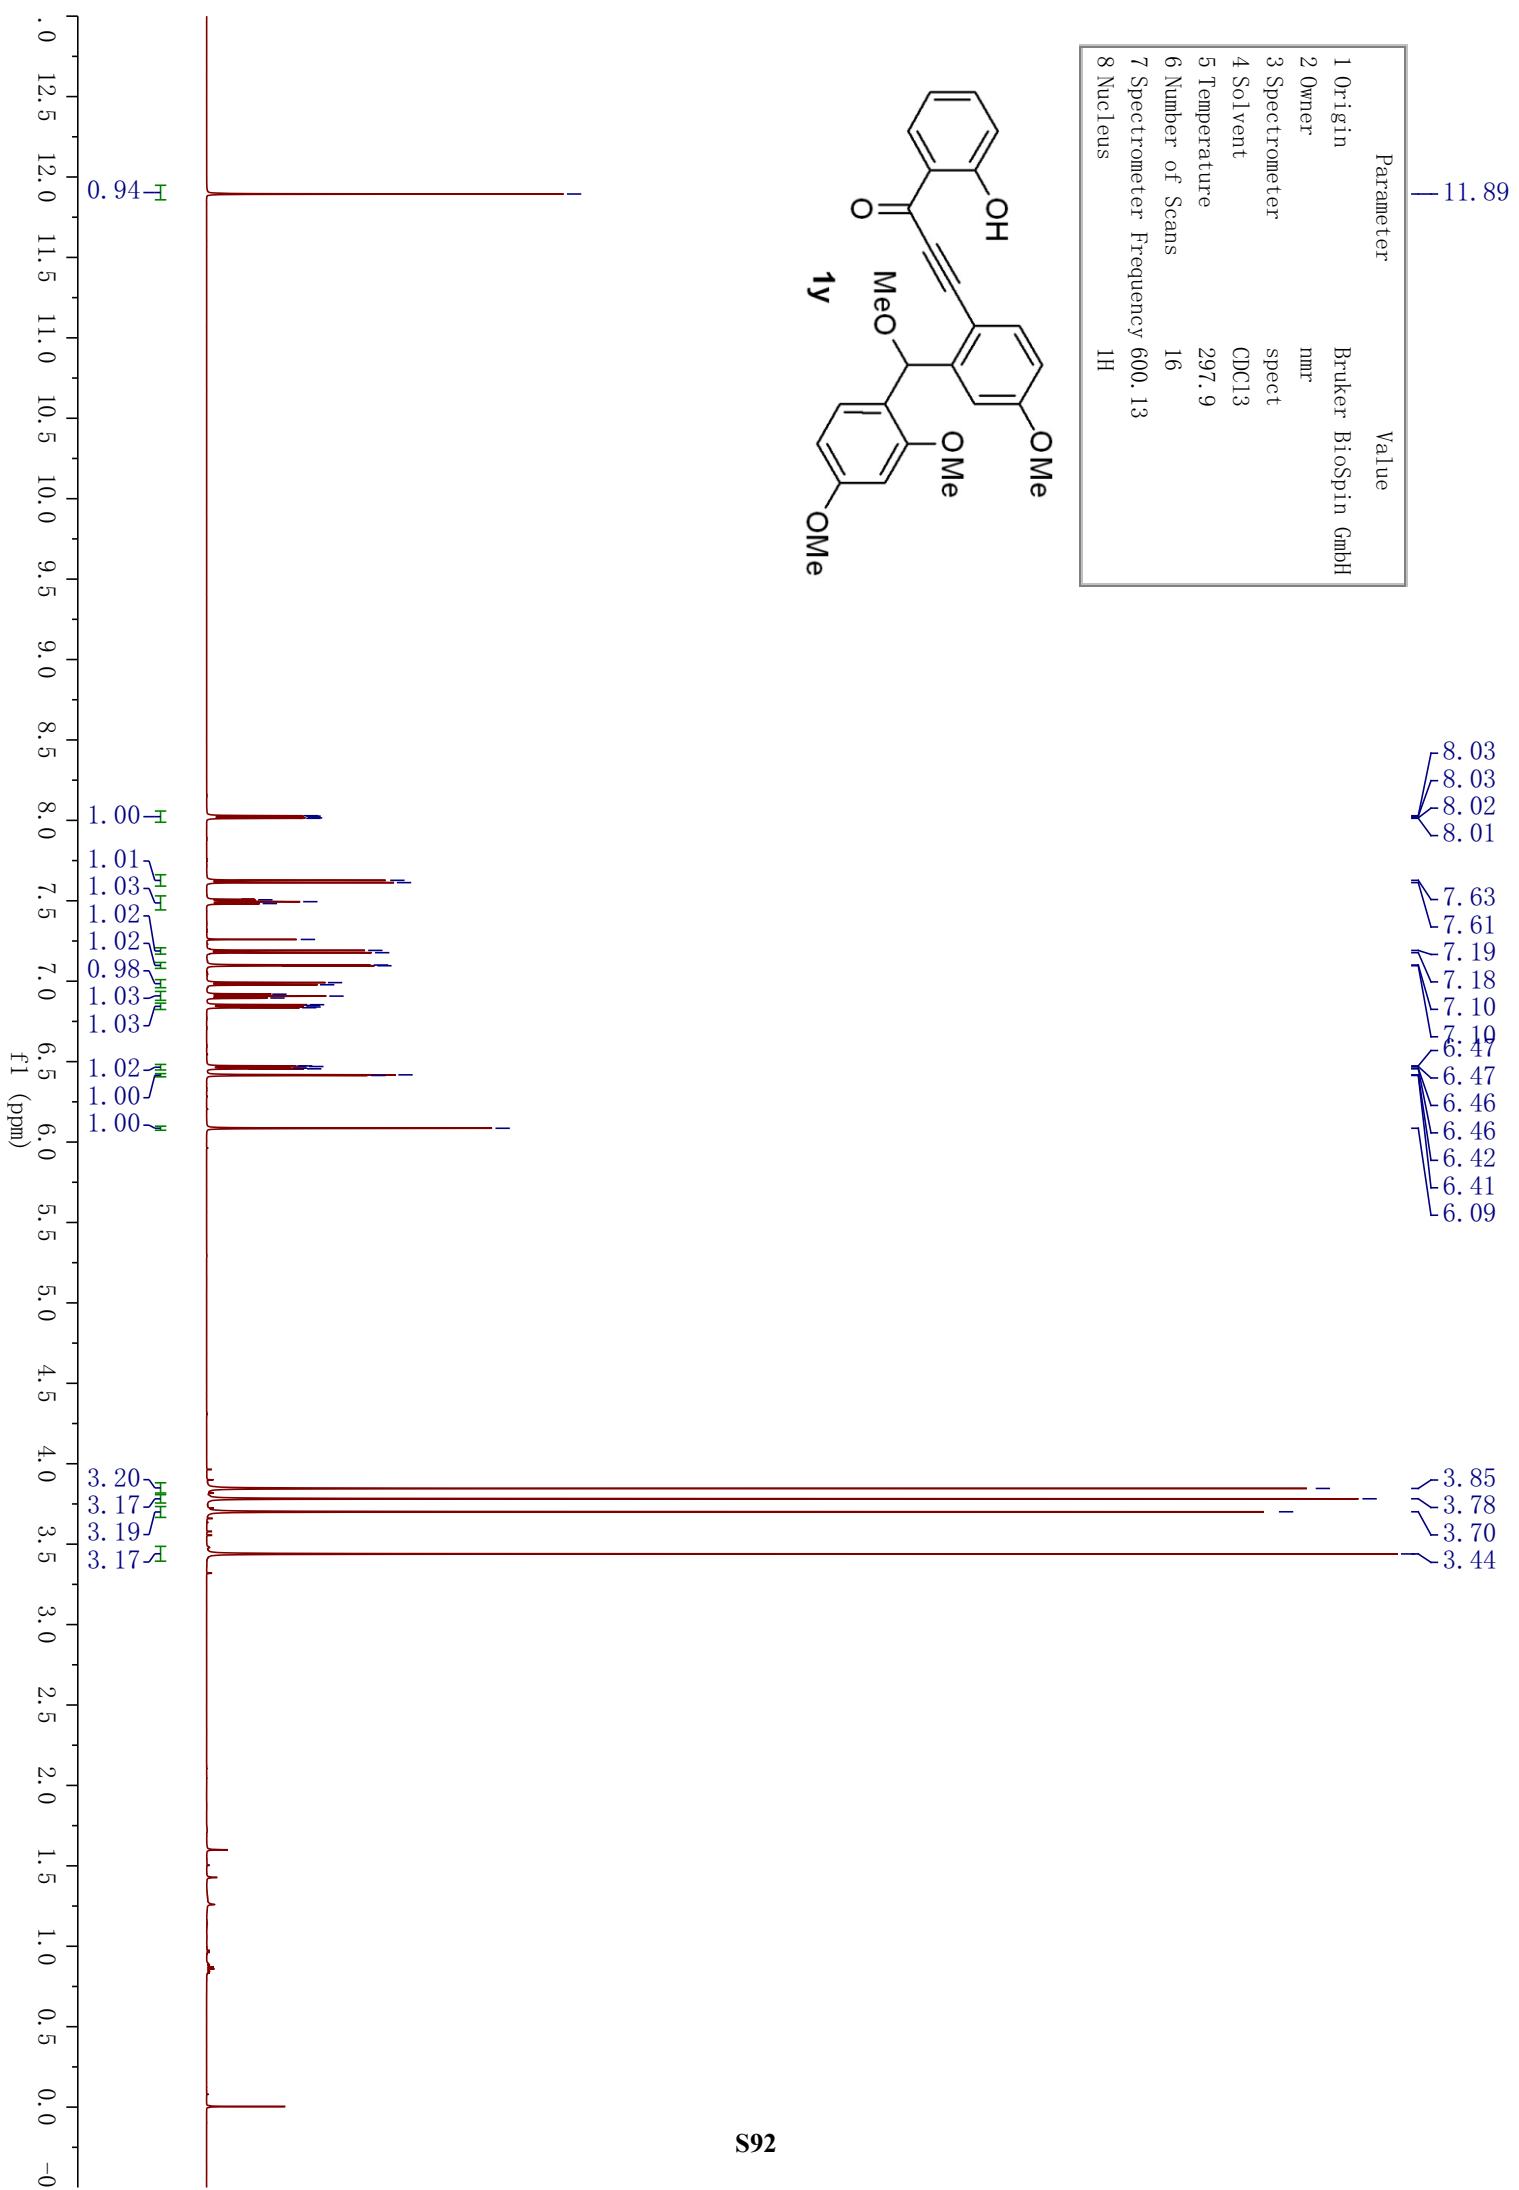

| Parameter                | Value               |
|--------------------------|---------------------|
| 1 Origin                 | Bruker Biospin GmbH |
| 2 Owner                  | nmr                 |
| 3 Spectrometer           | spect               |
| 4 Solvent                | CDCl3               |
| 5 Temperature            | 297.9               |
| 6 Number of Scans        | 317                 |
| 7 Spectrometer Frequency | 150.90              |
| 8 Nucleus                | <sup>13</sup> C     |

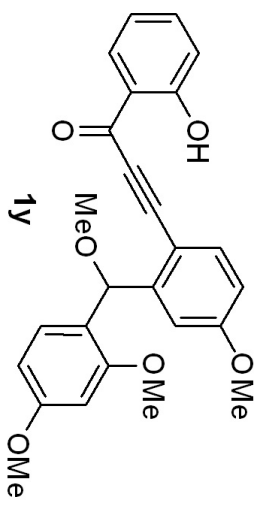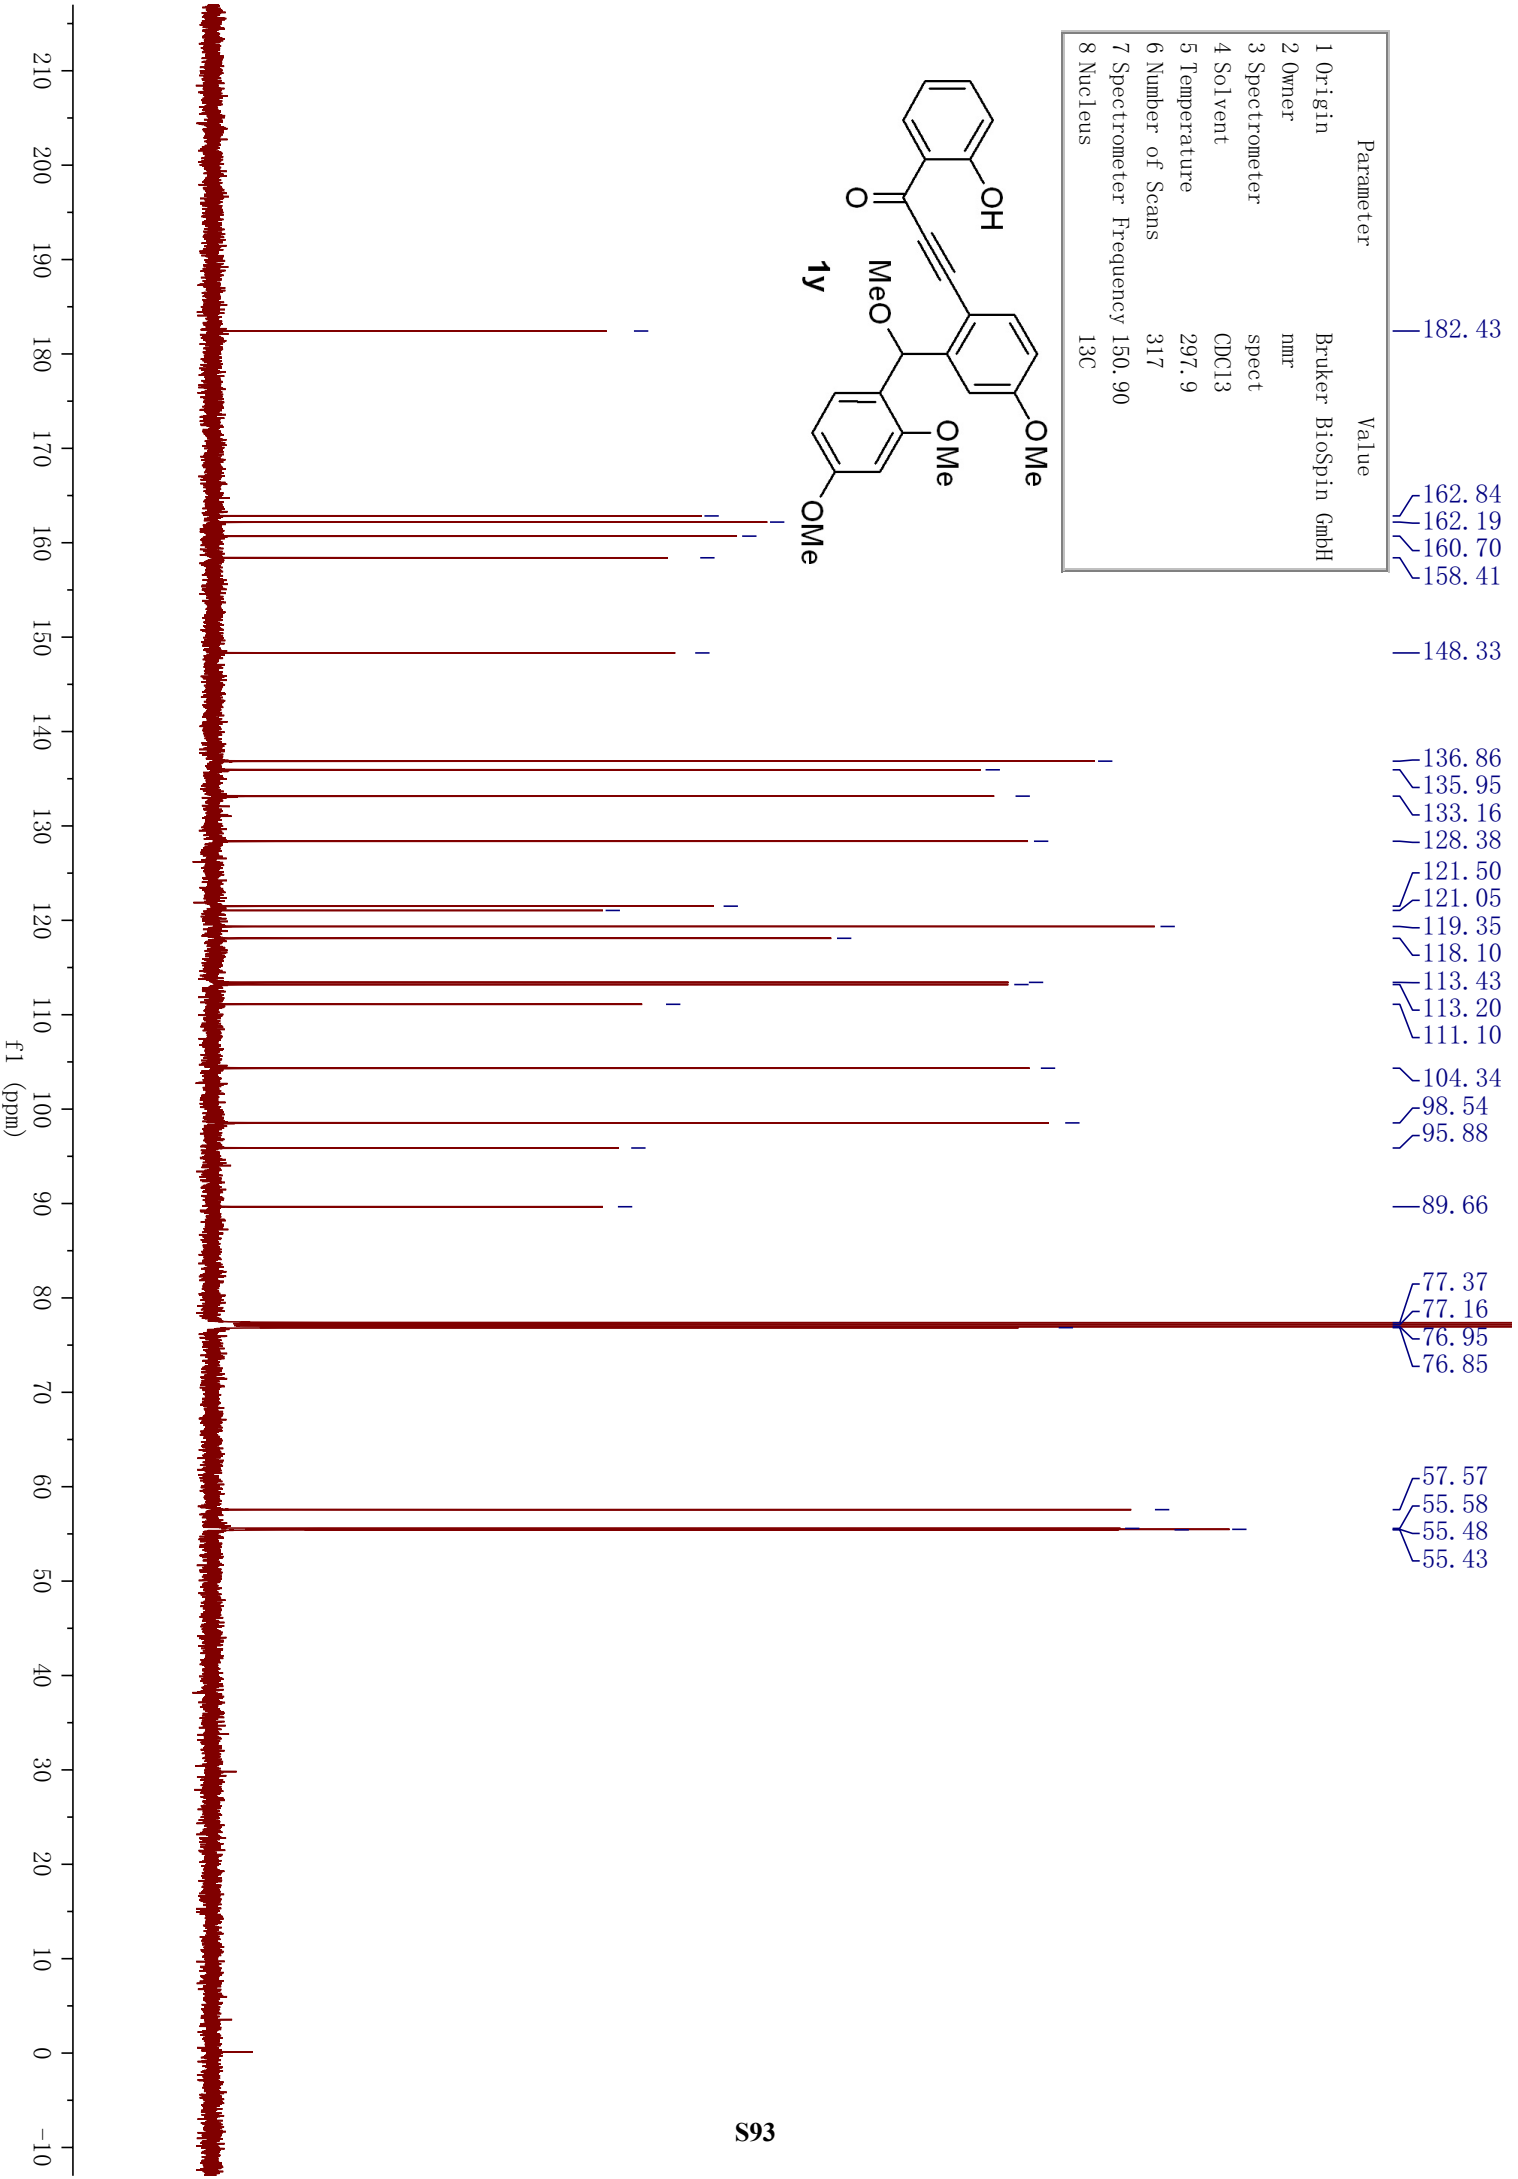

12.68

| Parameter                | Value               |
|--------------------------|---------------------|
| 1 Origin                 | Bruker Biospin GmbH |
| 2 Owner                  | nmr                 |
| 3 Spectrometer           | spect               |
| 4 Solvent                | CDCl3               |
| 5 Temperature            | 297.9               |
| 6 Number of Scans        | 16                  |
| 7 Spectrometer Frequency | 600.13              |
| 8 Nucleus                | <sup>1</sup> H      |

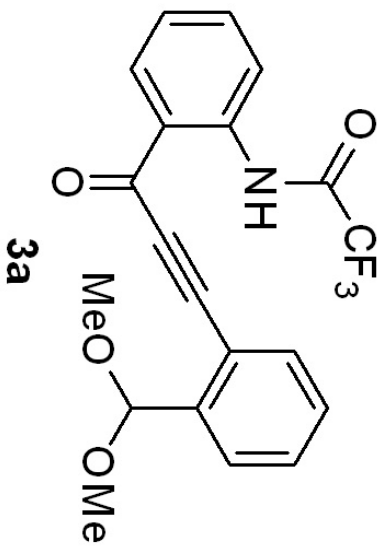

8.72  
8.72  
8.71  
8.71  
8.62  
8.62  
8.61  
8.61

7.73  
7.73  
7.72  
7.72  
7.72  
7.71  
7.70  
7.70  
7.55  
7.54  
7.42  
7.42  
7.37  
5.72

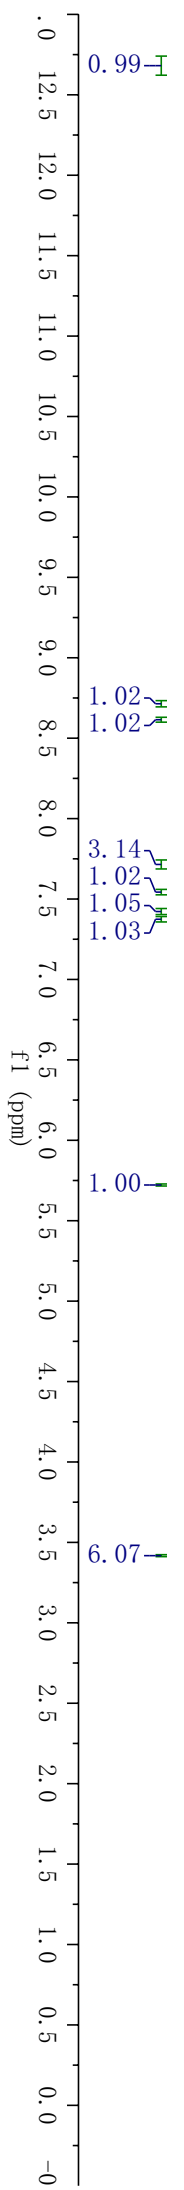

| Parameter                | Value               |
|--------------------------|---------------------|
| 1 Origin                 | Bruker Biospin GmbH |
| 2 Owner                  | nmr                 |
| 3 Spectrometer           | spect               |
| 4 Solvent                | CDCl3               |
| 5 Temperature            | 297.9               |
| 6 Number of Scans        | 265                 |
| 7 Spectrometer Frequency | 150.90              |
| 8 Nucleus                | <sup>13</sup> C     |

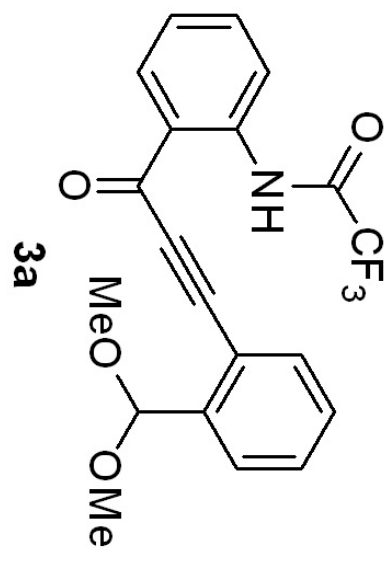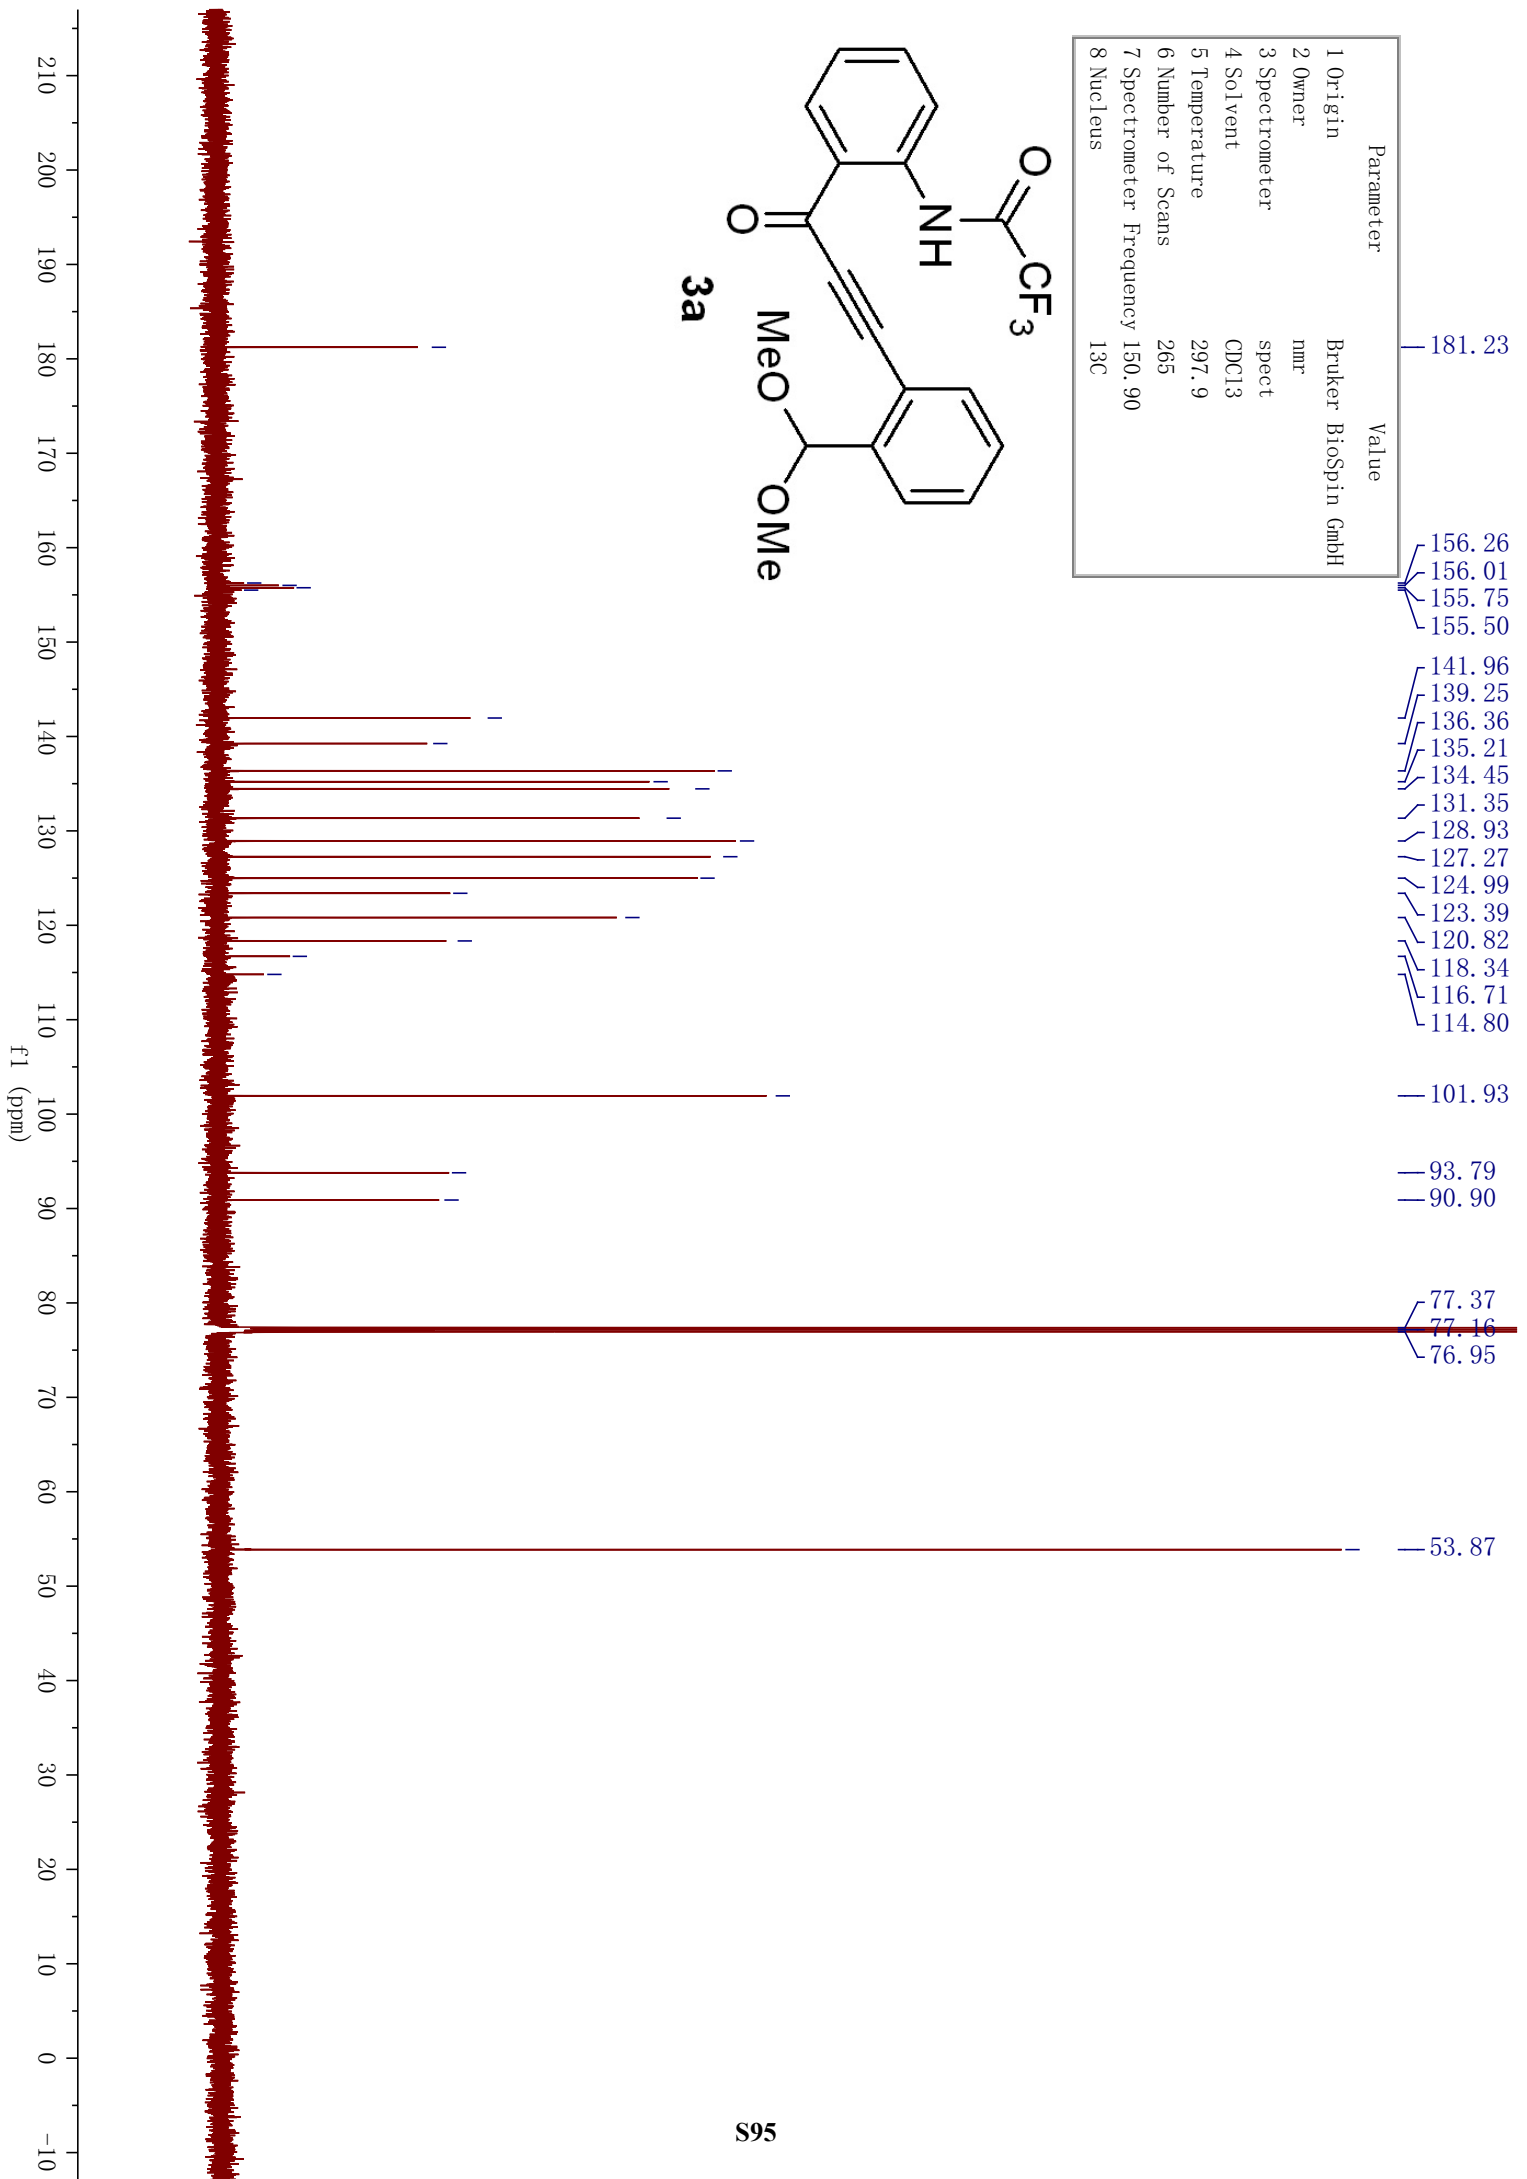

| Parameter                | Value                |
|--------------------------|----------------------|
| 1 Origin                 | Brucker BioSpin GmbH |
| 2 Owner                  | nmr                  |
| 3 Spectrometer           | spect                |
| 4 Solvent                | CDCl3                |
| 5 Temperature            | 297.9                |
| 6 Number of Scans        | 16                   |
| 7 Spectrometer Frequency | 600.13               |
| 8 Nucleus                | <sup>1</sup> H       |

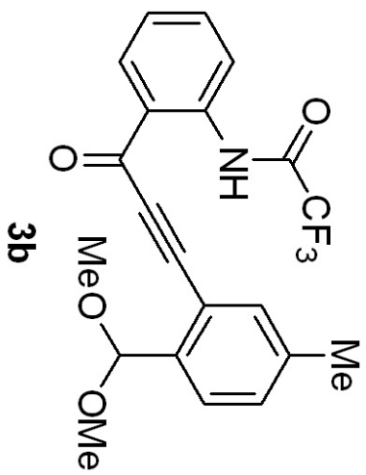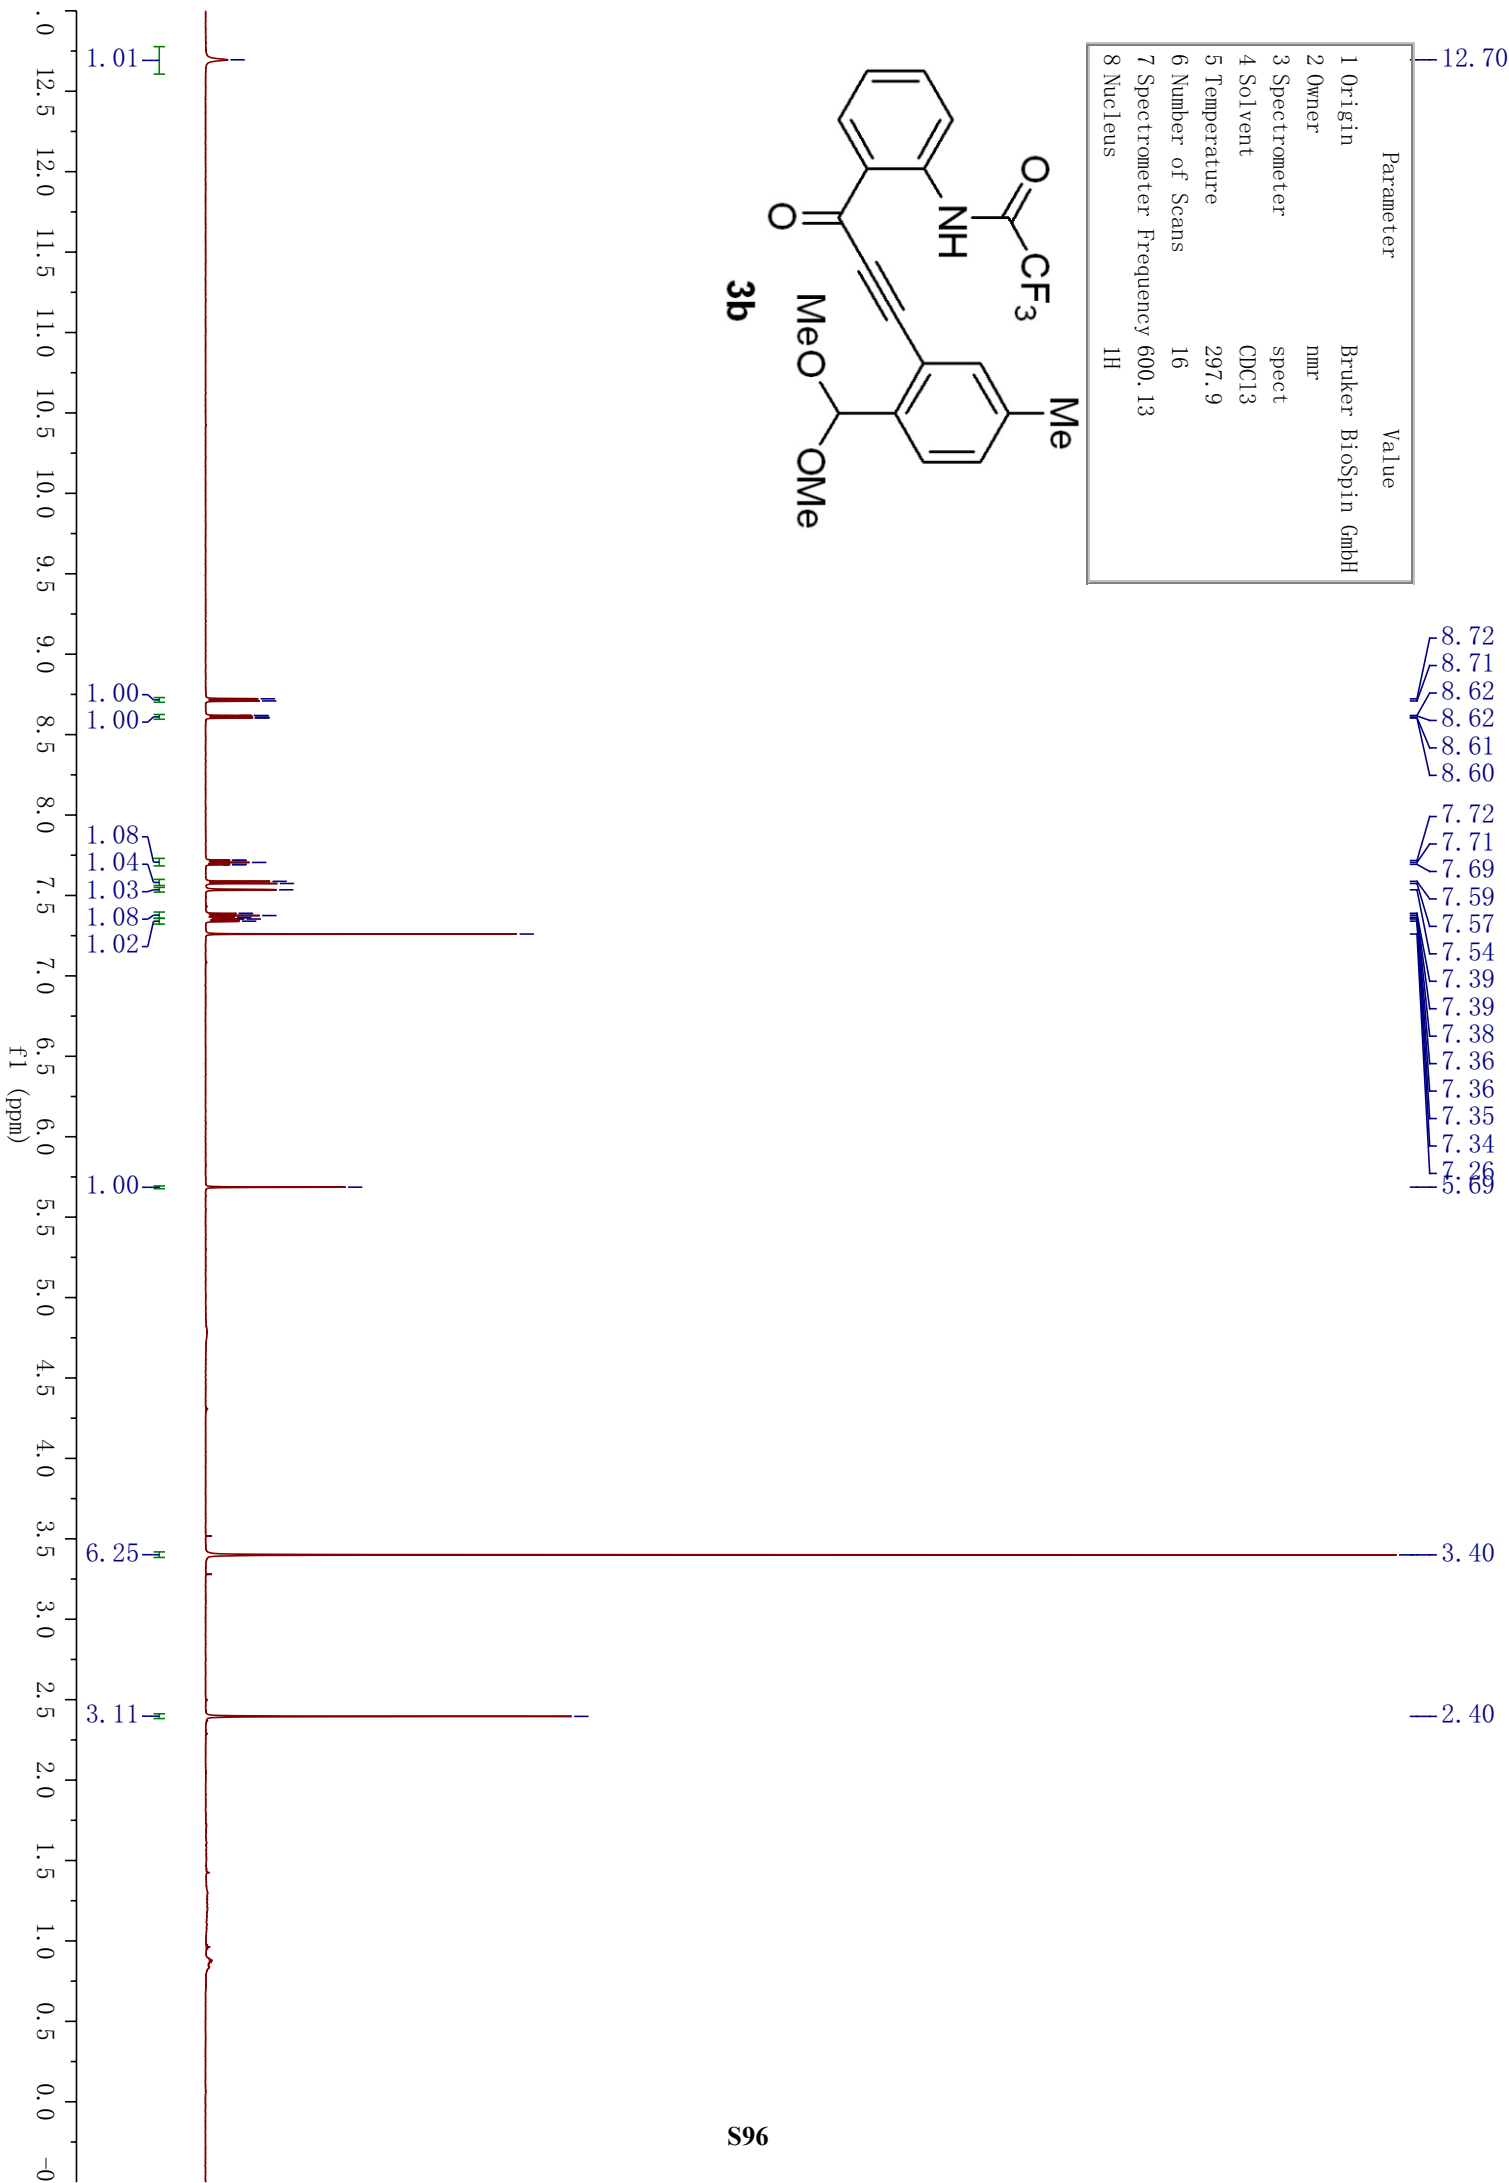

| Parameter                | Value               |
|--------------------------|---------------------|
| 1 Origin                 | Brüker BioSpin GmbH |
| 2 Owner                  | nmr                 |
| 3 Spectrometer           | spect               |
| 4 Solvent                | CDCl3               |
| 5 Temperature            | 297.9               |
| 6 Number of Scans        | 902                 |
| 7 Spectrometer Frequency | 150.90              |
| 8 Nucleus                | <sup>13</sup> C     |

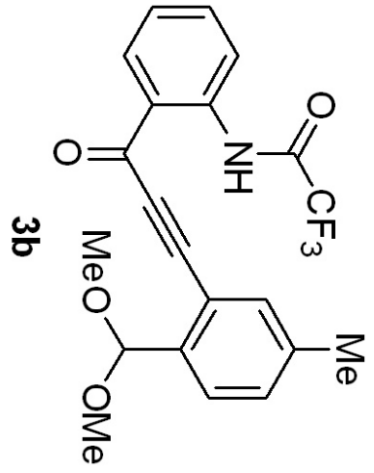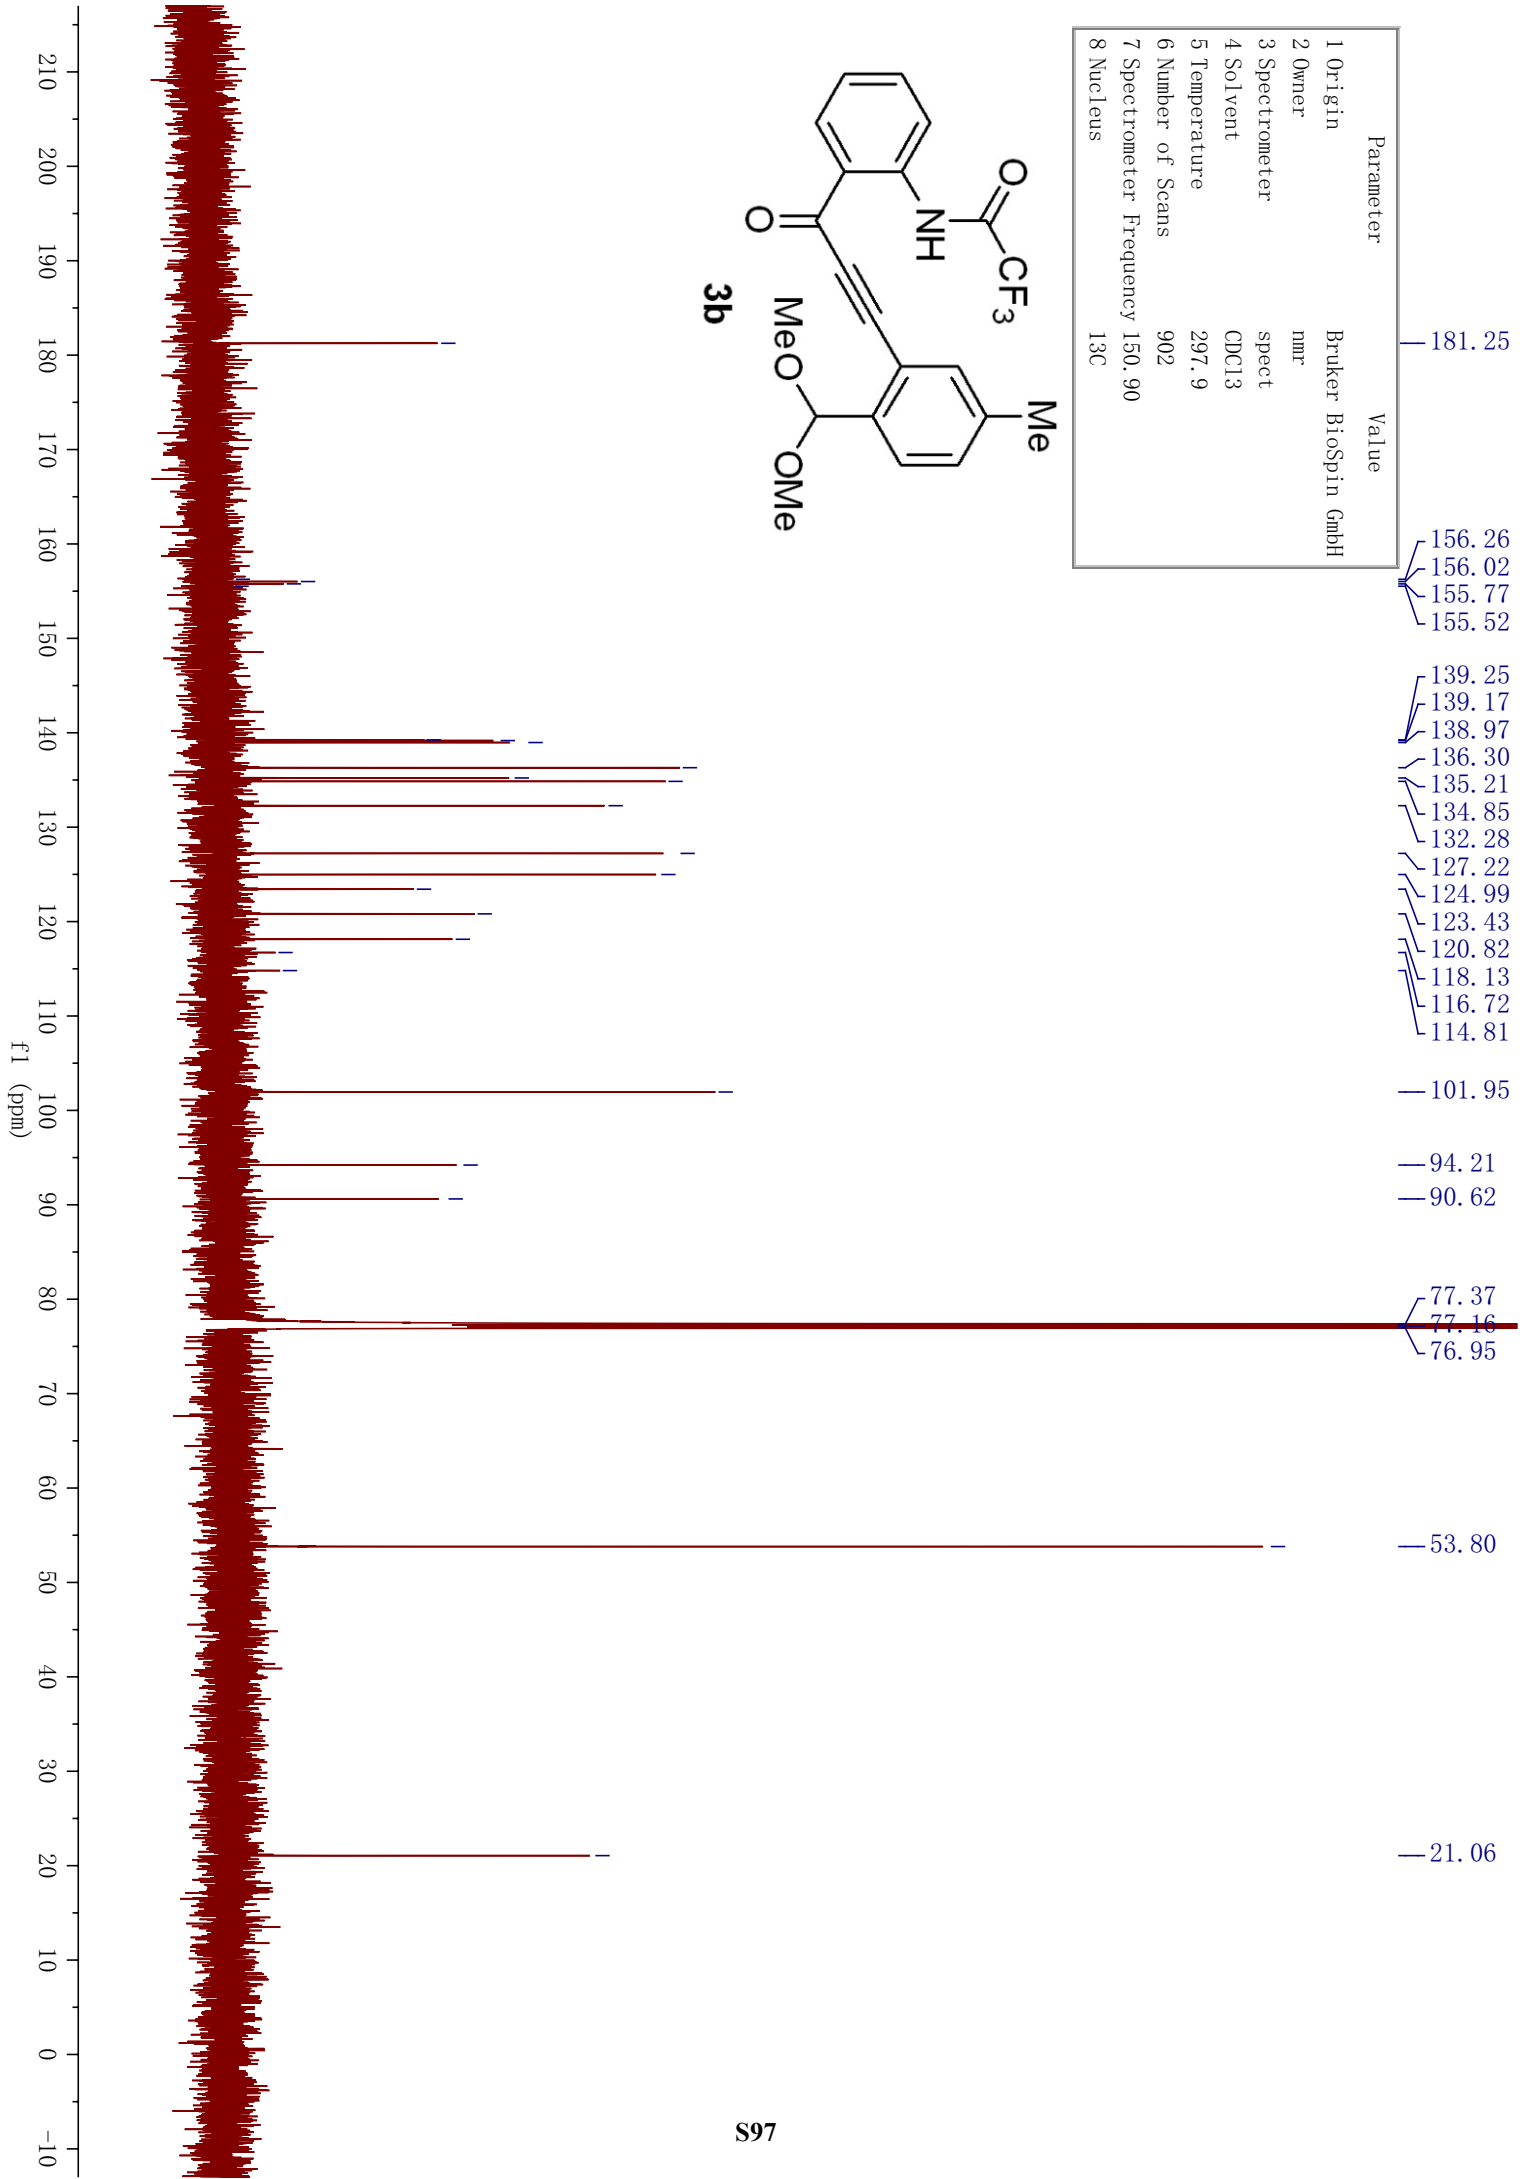

| Parameter                | Value               |
|--------------------------|---------------------|
| 1 Origin                 | Bruker Biospin GmbH |
| 2 Owner                  | nmr                 |
| 3 Spectrometer           | spect               |
| 4 Solvent                | CDCl3               |
| 5 Temperature            | 297.9               |
| 6 Number of Scans        | 16                  |
| 7 Spectrometer Frequency | 600.13              |
| 8 Nucleus                | <sup>1</sup> H      |

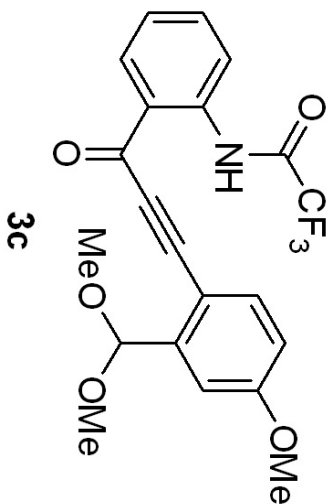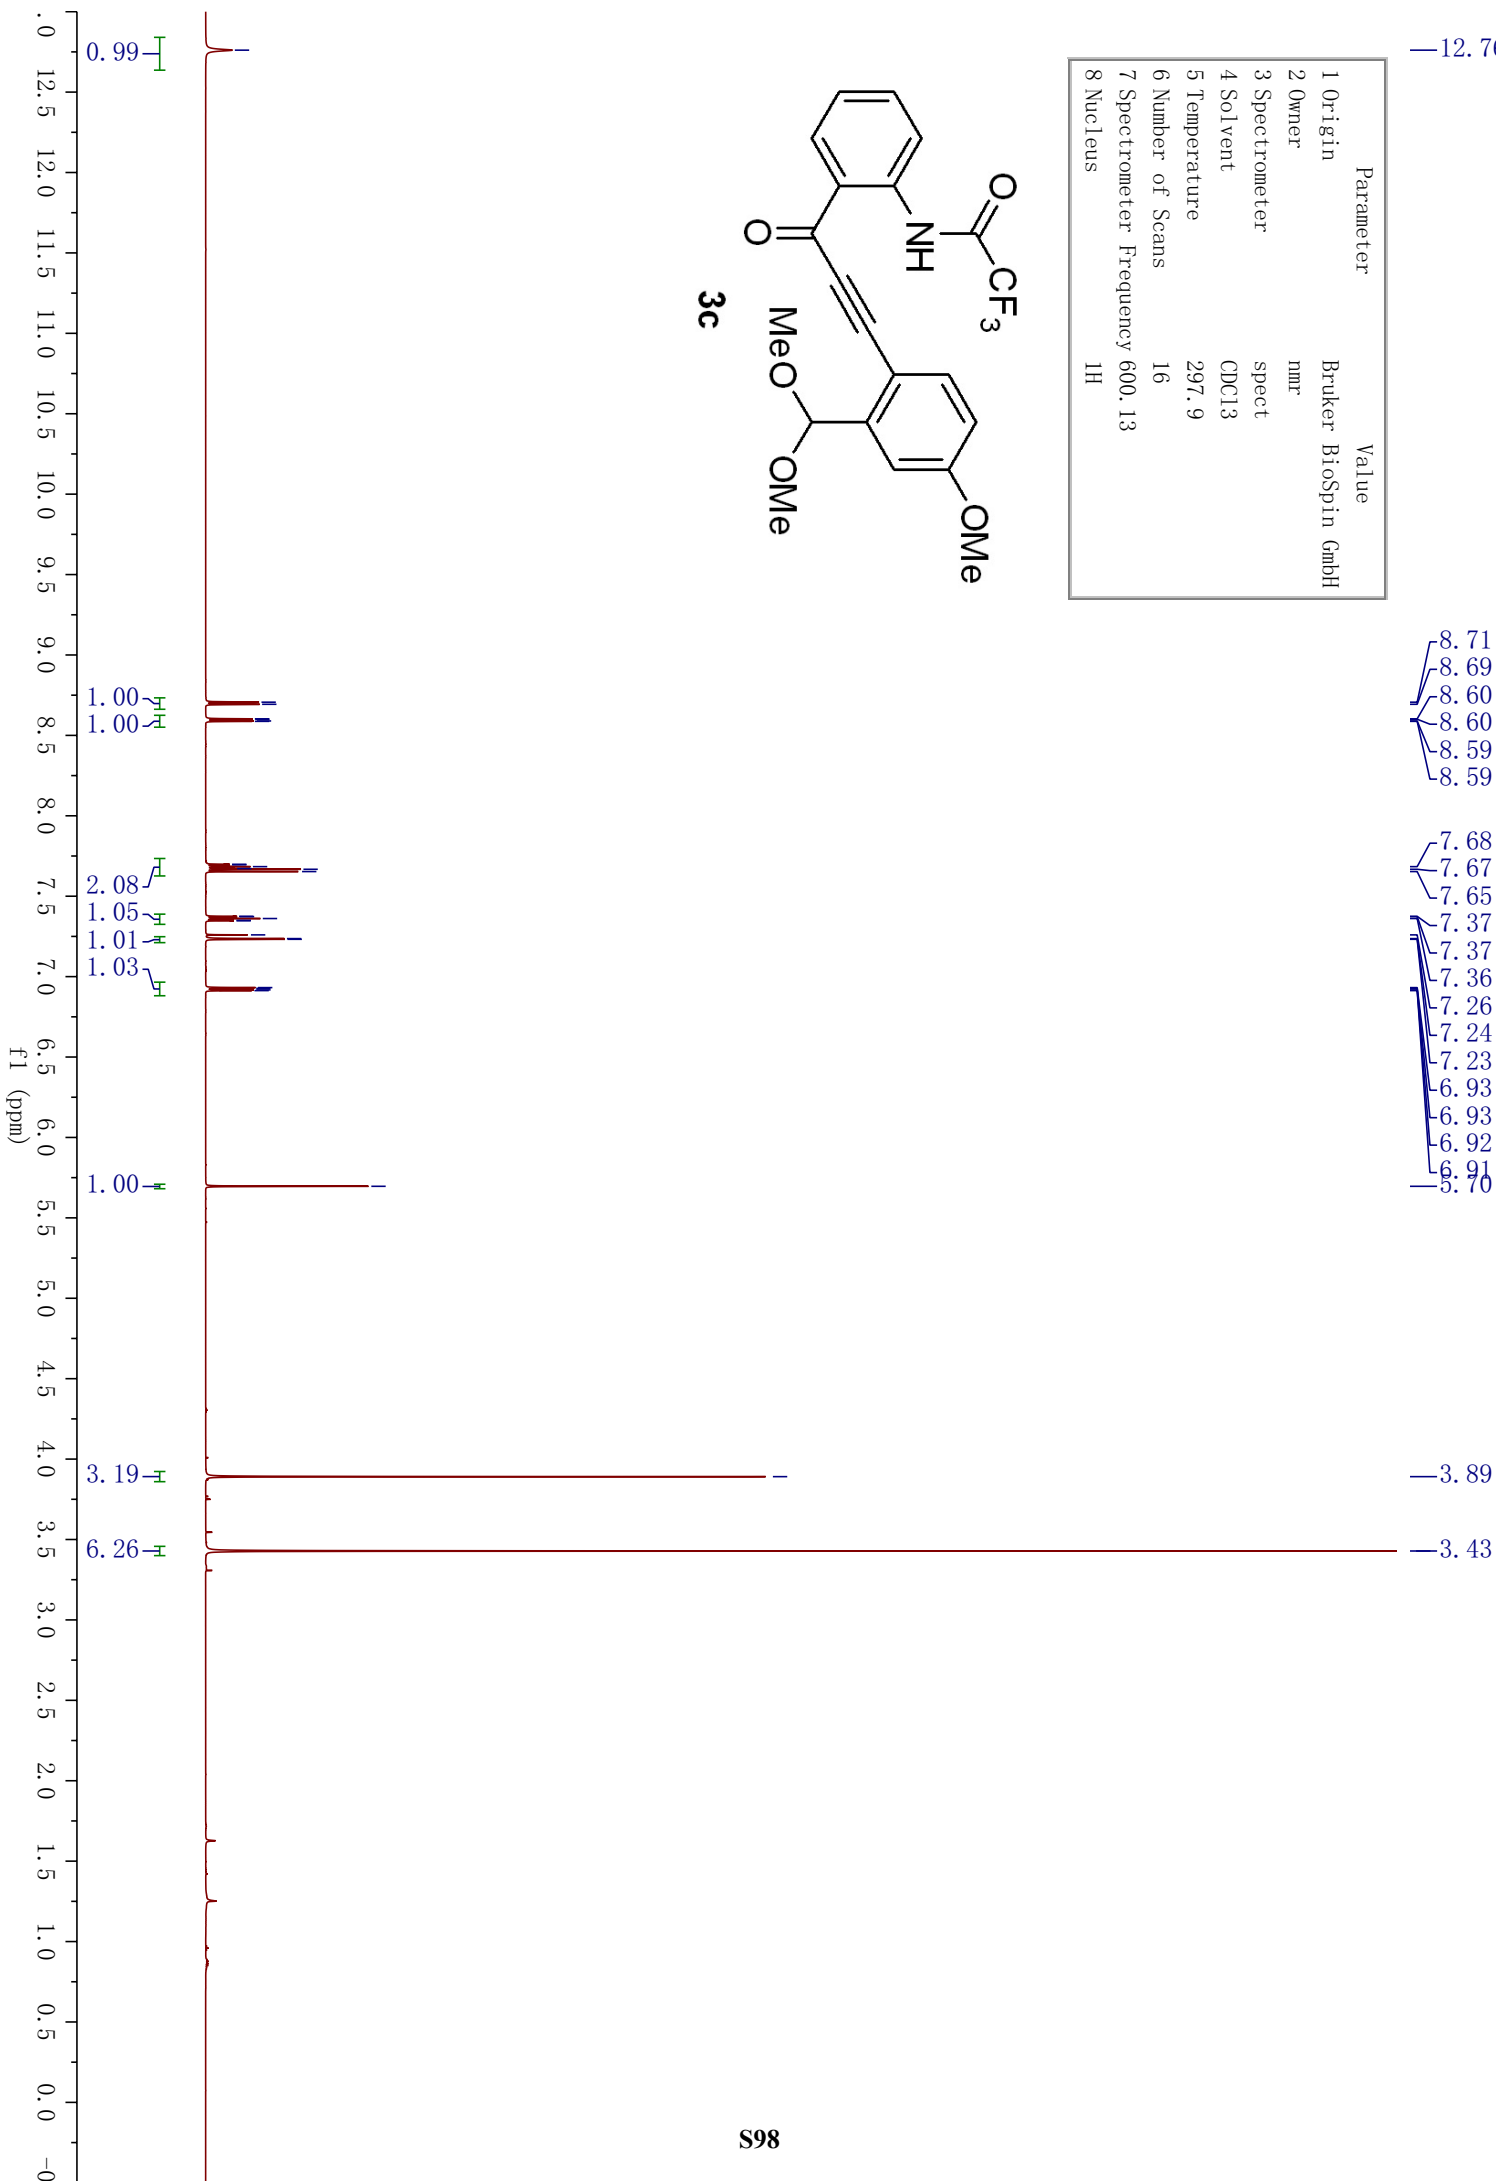

| Parameter                | Value               |
|--------------------------|---------------------|
| 1 Origin                 | Brüker Biospin GmbH |
| 2 Owner                  | nmr                 |
| 3 Spectrometer           | spect               |
| 4 Solvent                | CDCl <sub>3</sub>   |
| 5 Temperature            | 297.9               |
| 6 Number of Scans        | 571                 |
| 7 Spectrometer Frequency | 150.90              |
| 8 Nucleus                | <sup>13</sup> C     |

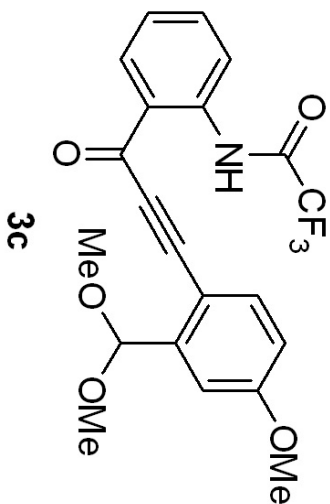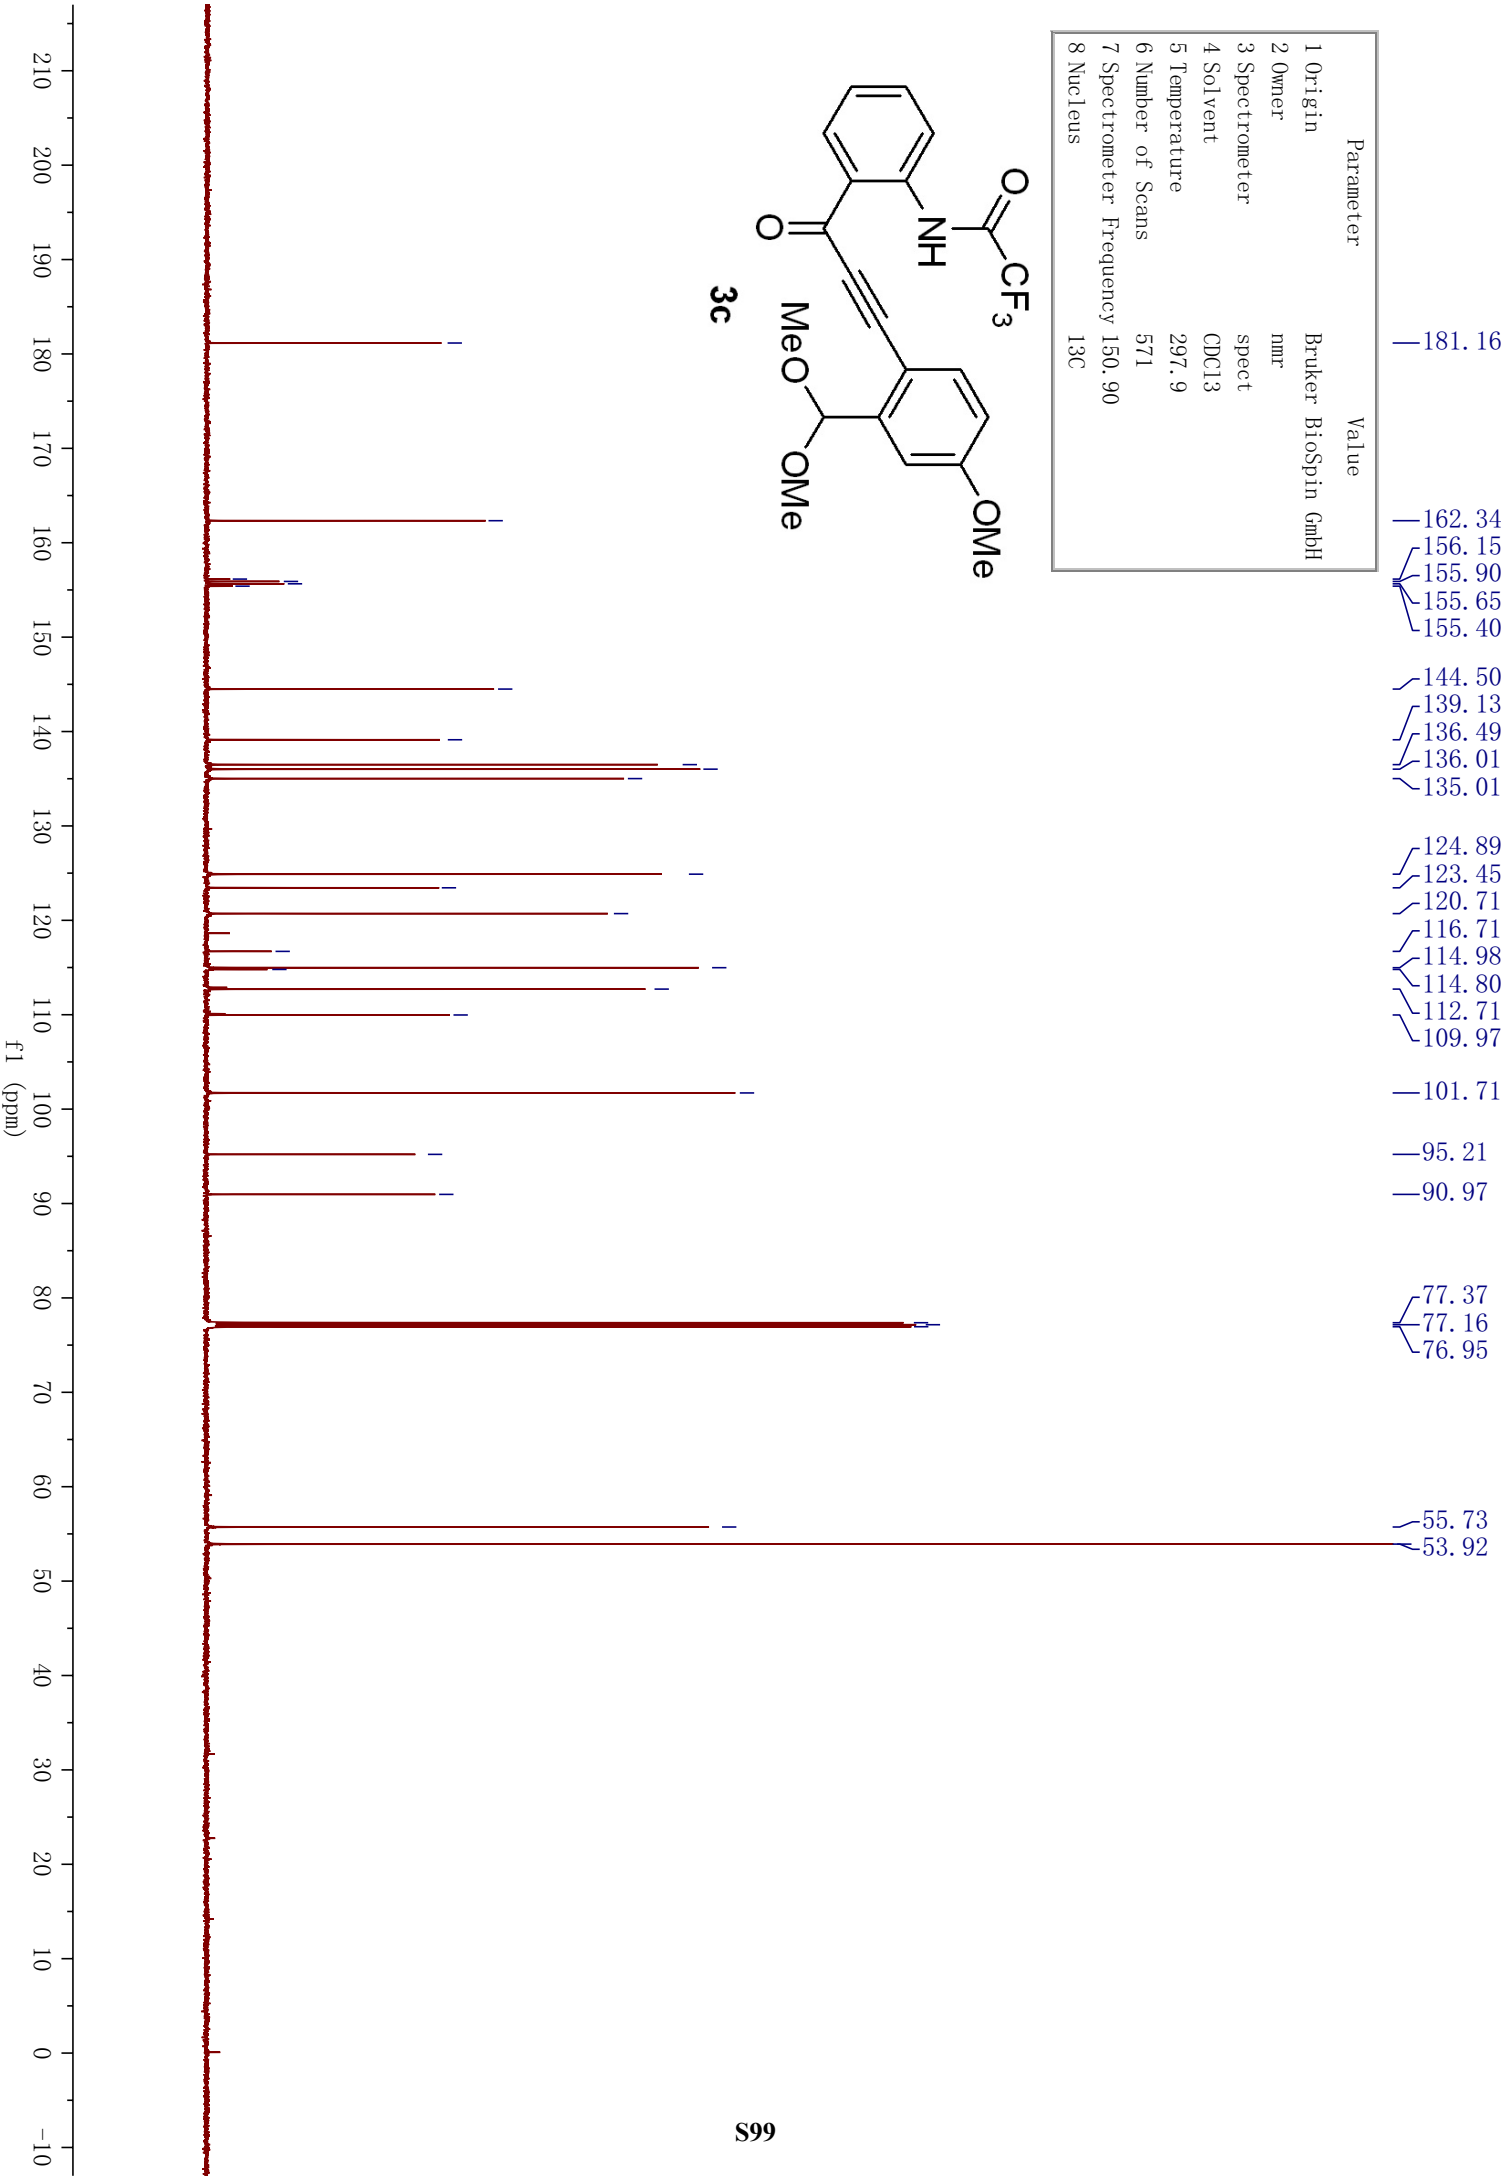



| Parameter                | Value                |
|--------------------------|----------------------|
| 1 Origin                 | Brucker BioSpin GmbH |
| 2 Owner                  | nmr                  |
| 3 Spectrometer           | spect                |
| 4 Solvent                | CDCl3                |
| 5 Temperature            | 297.9                |
| 6 Number of Scans        | 16                   |
| 7 Spectrometer Frequency | 600.13               |
| 8 Nucleus                | <sup>1</sup> H       |

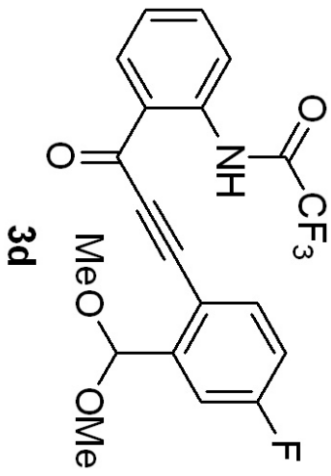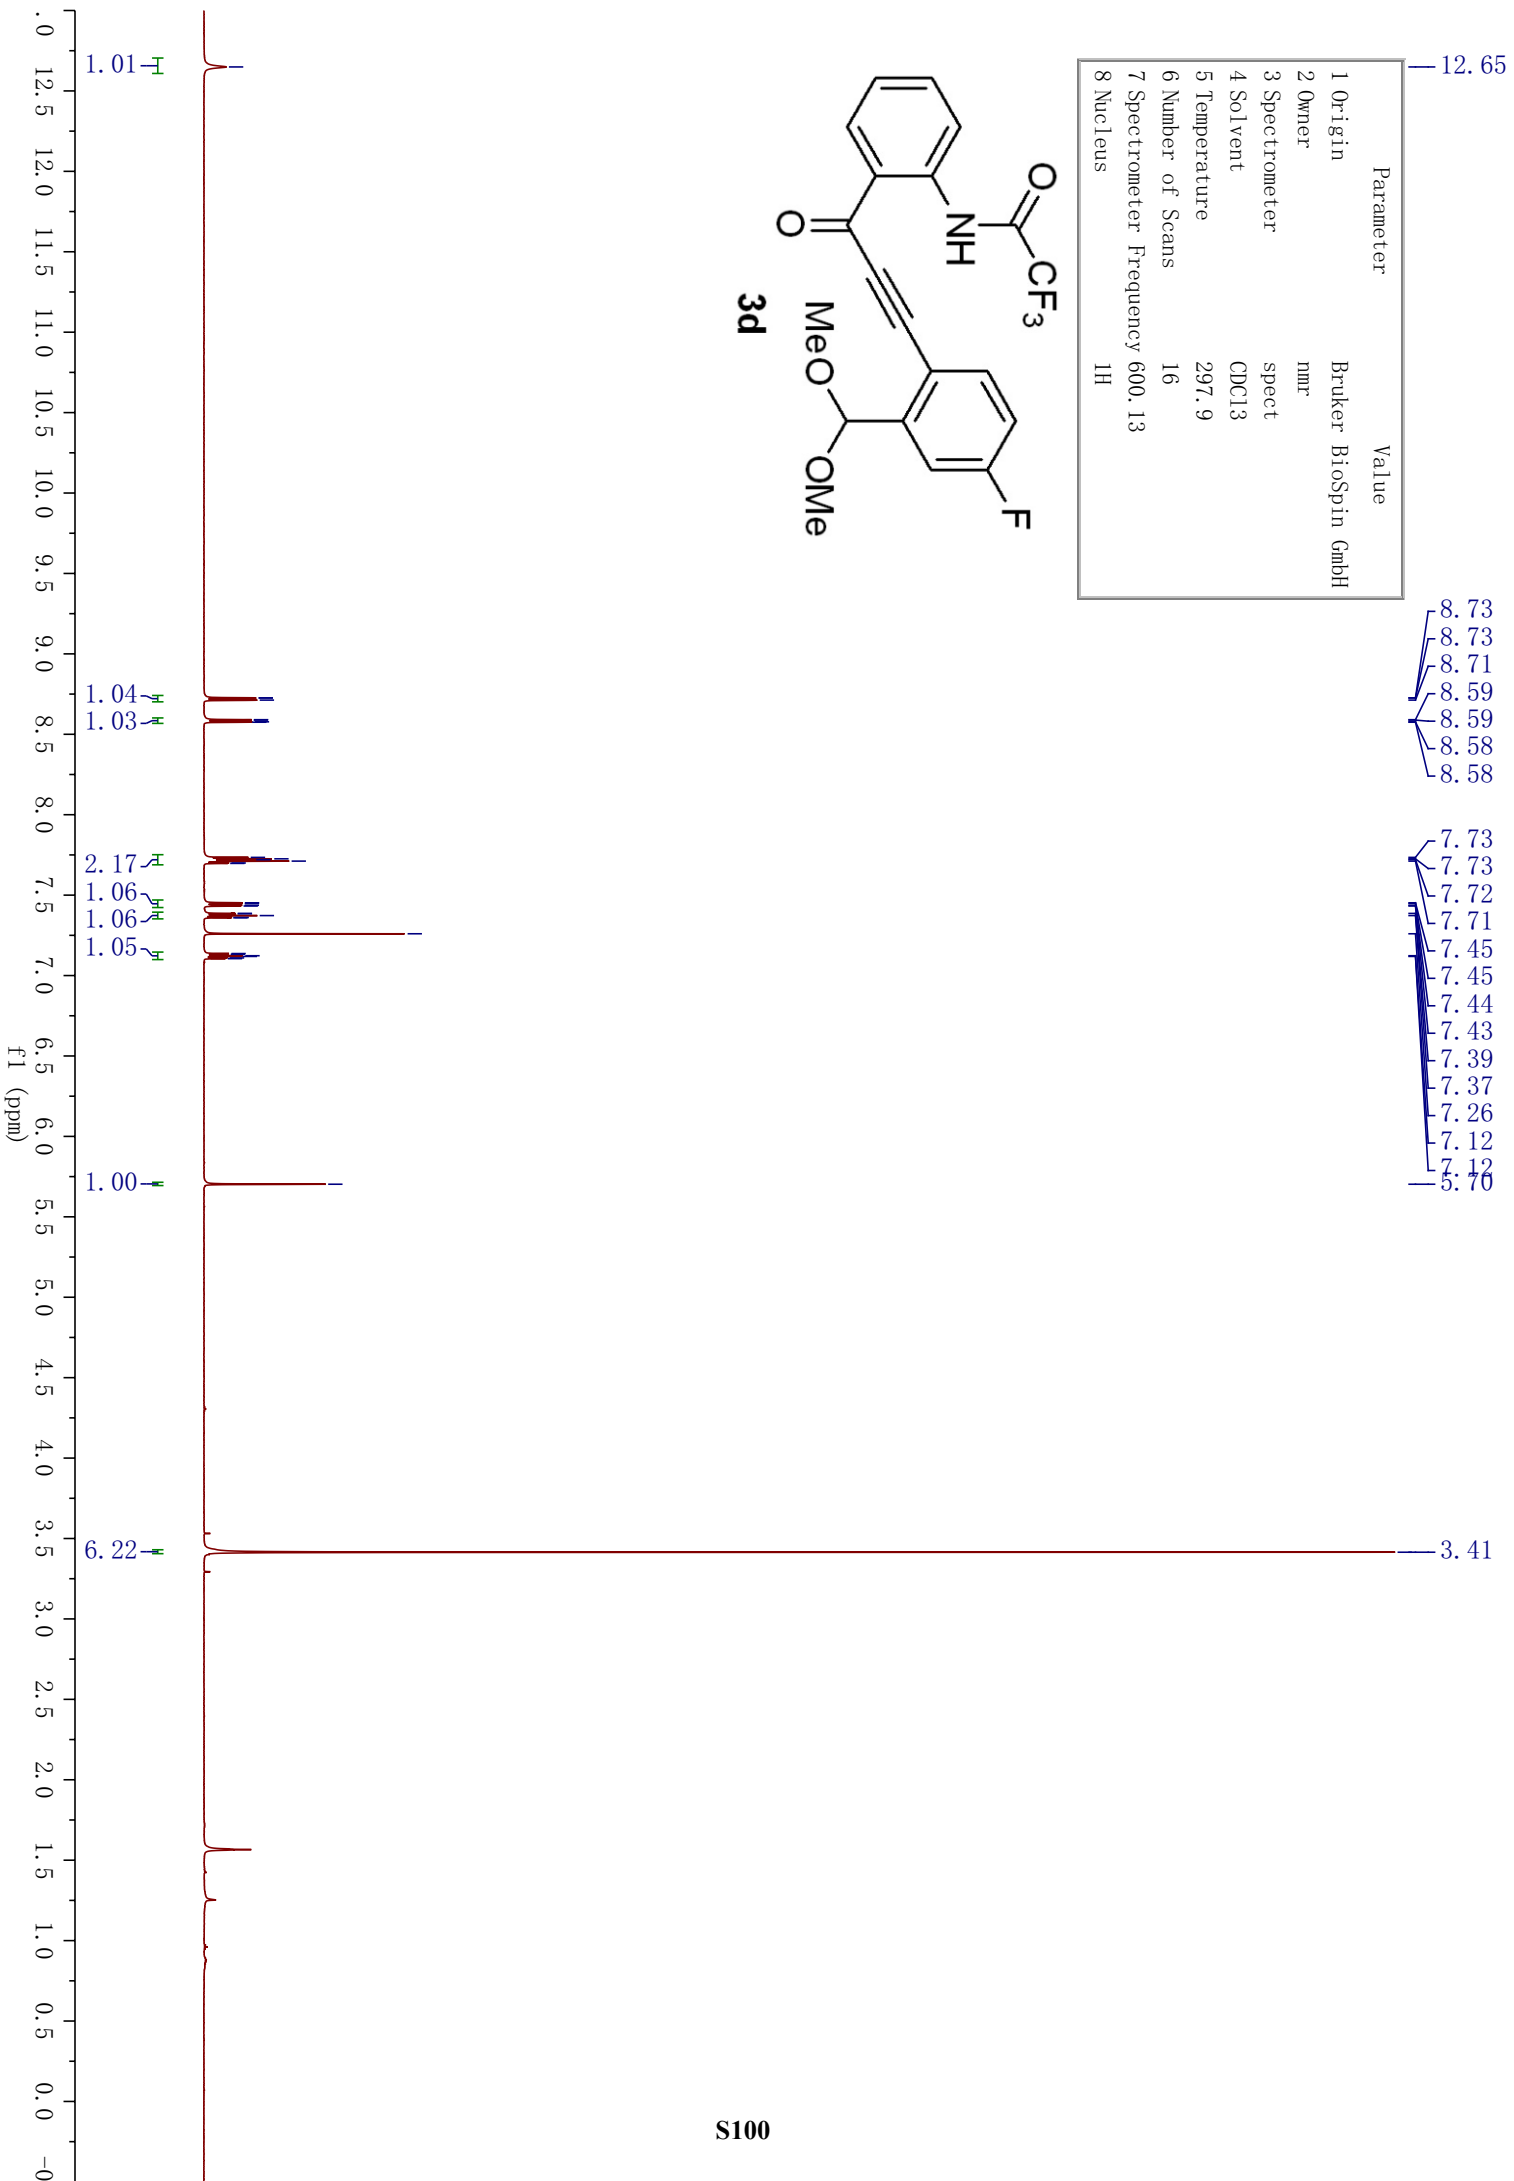

| Parameter                | Value                |
|--------------------------|----------------------|
| 1 Origin                 | Brucker BioSpin GmbH |
| 2 Owner                  | nmr                  |
| 3 Spectrometer           | spect                |
| 4 Solvent                | CDCl3                |
| 5 Temperature            | 297.9                |
| 6 Number of Scans        | 906                  |
| 7 Spectrometer Frequency | 150.90               |
| 8 Nucleus                | <sup>13</sup> C      |

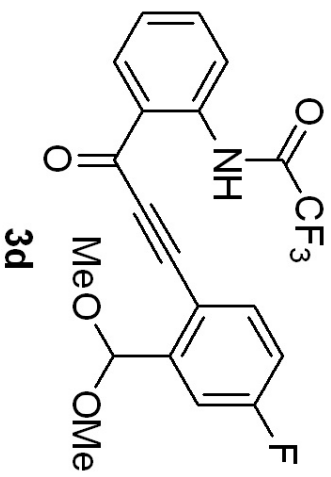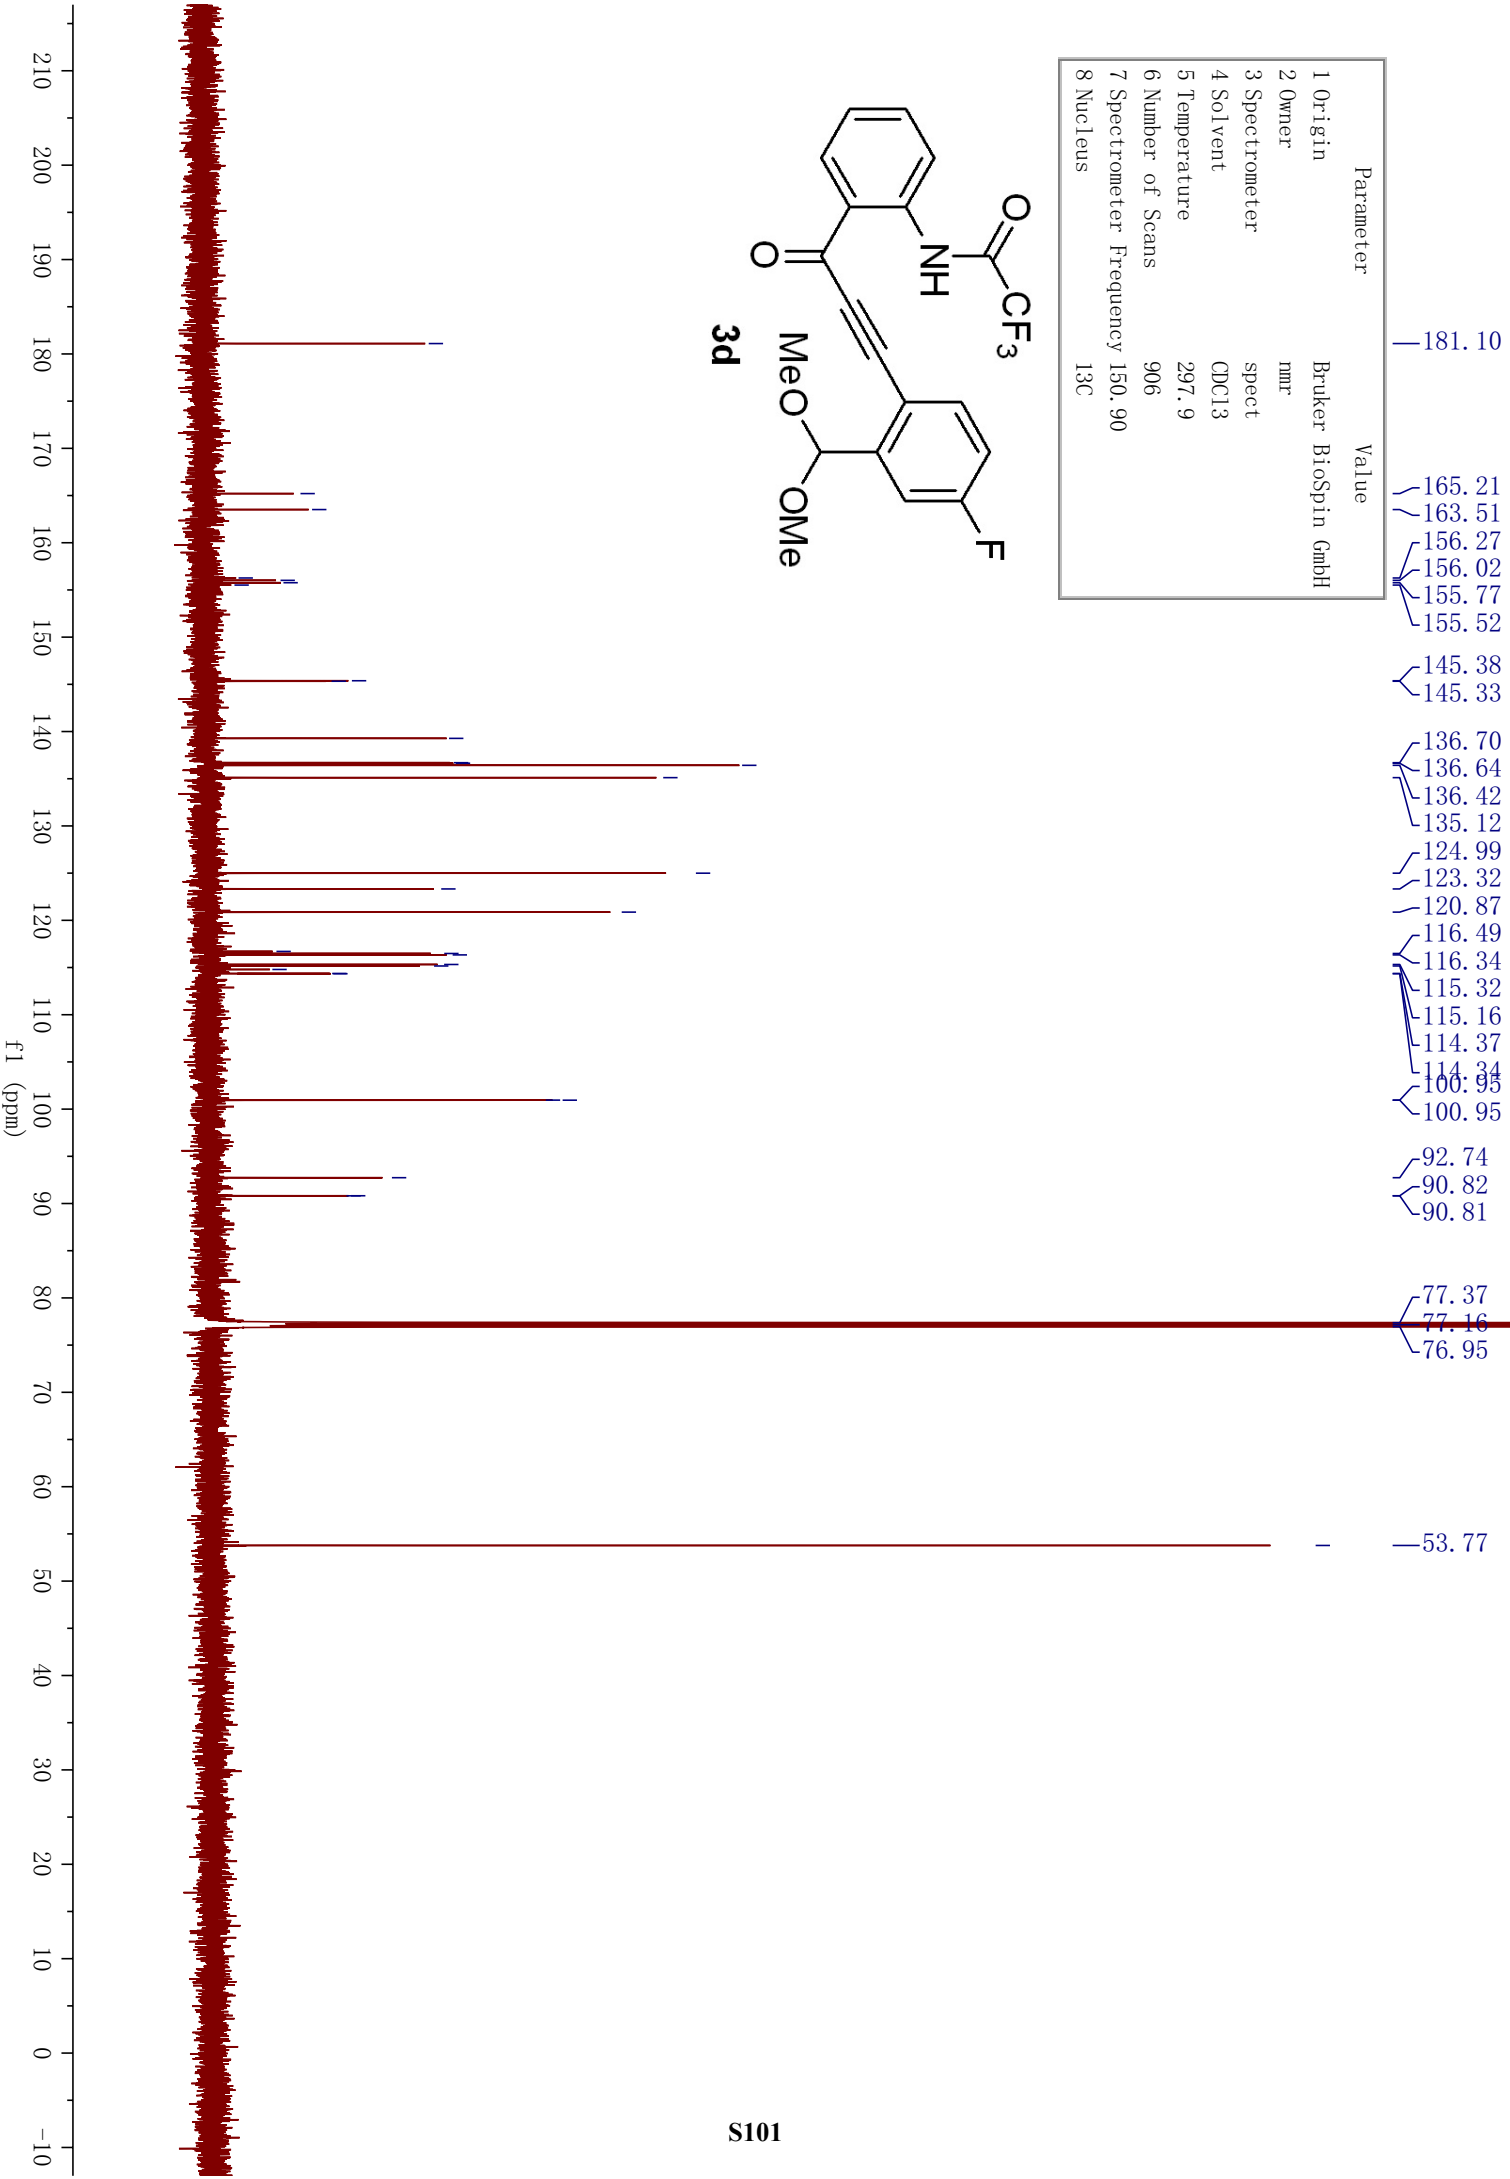

| Parameter                | Value               |
|--------------------------|---------------------|
| 1 Origin                 | Brüker Biospin GmbH |
| 2 Owner                  | nmr                 |
| 3 Spectrometer           | spect               |
| 4 Solvent                | CDCl3               |
| 5 Temperature            | 297.9               |
| 6 Number of Scans        | 16                  |
| 7 Spectrometer Frequency | 600.13              |
| 8 Nucleus                | <sup>1</sup> H      |

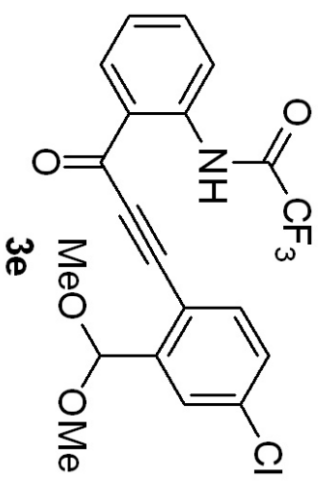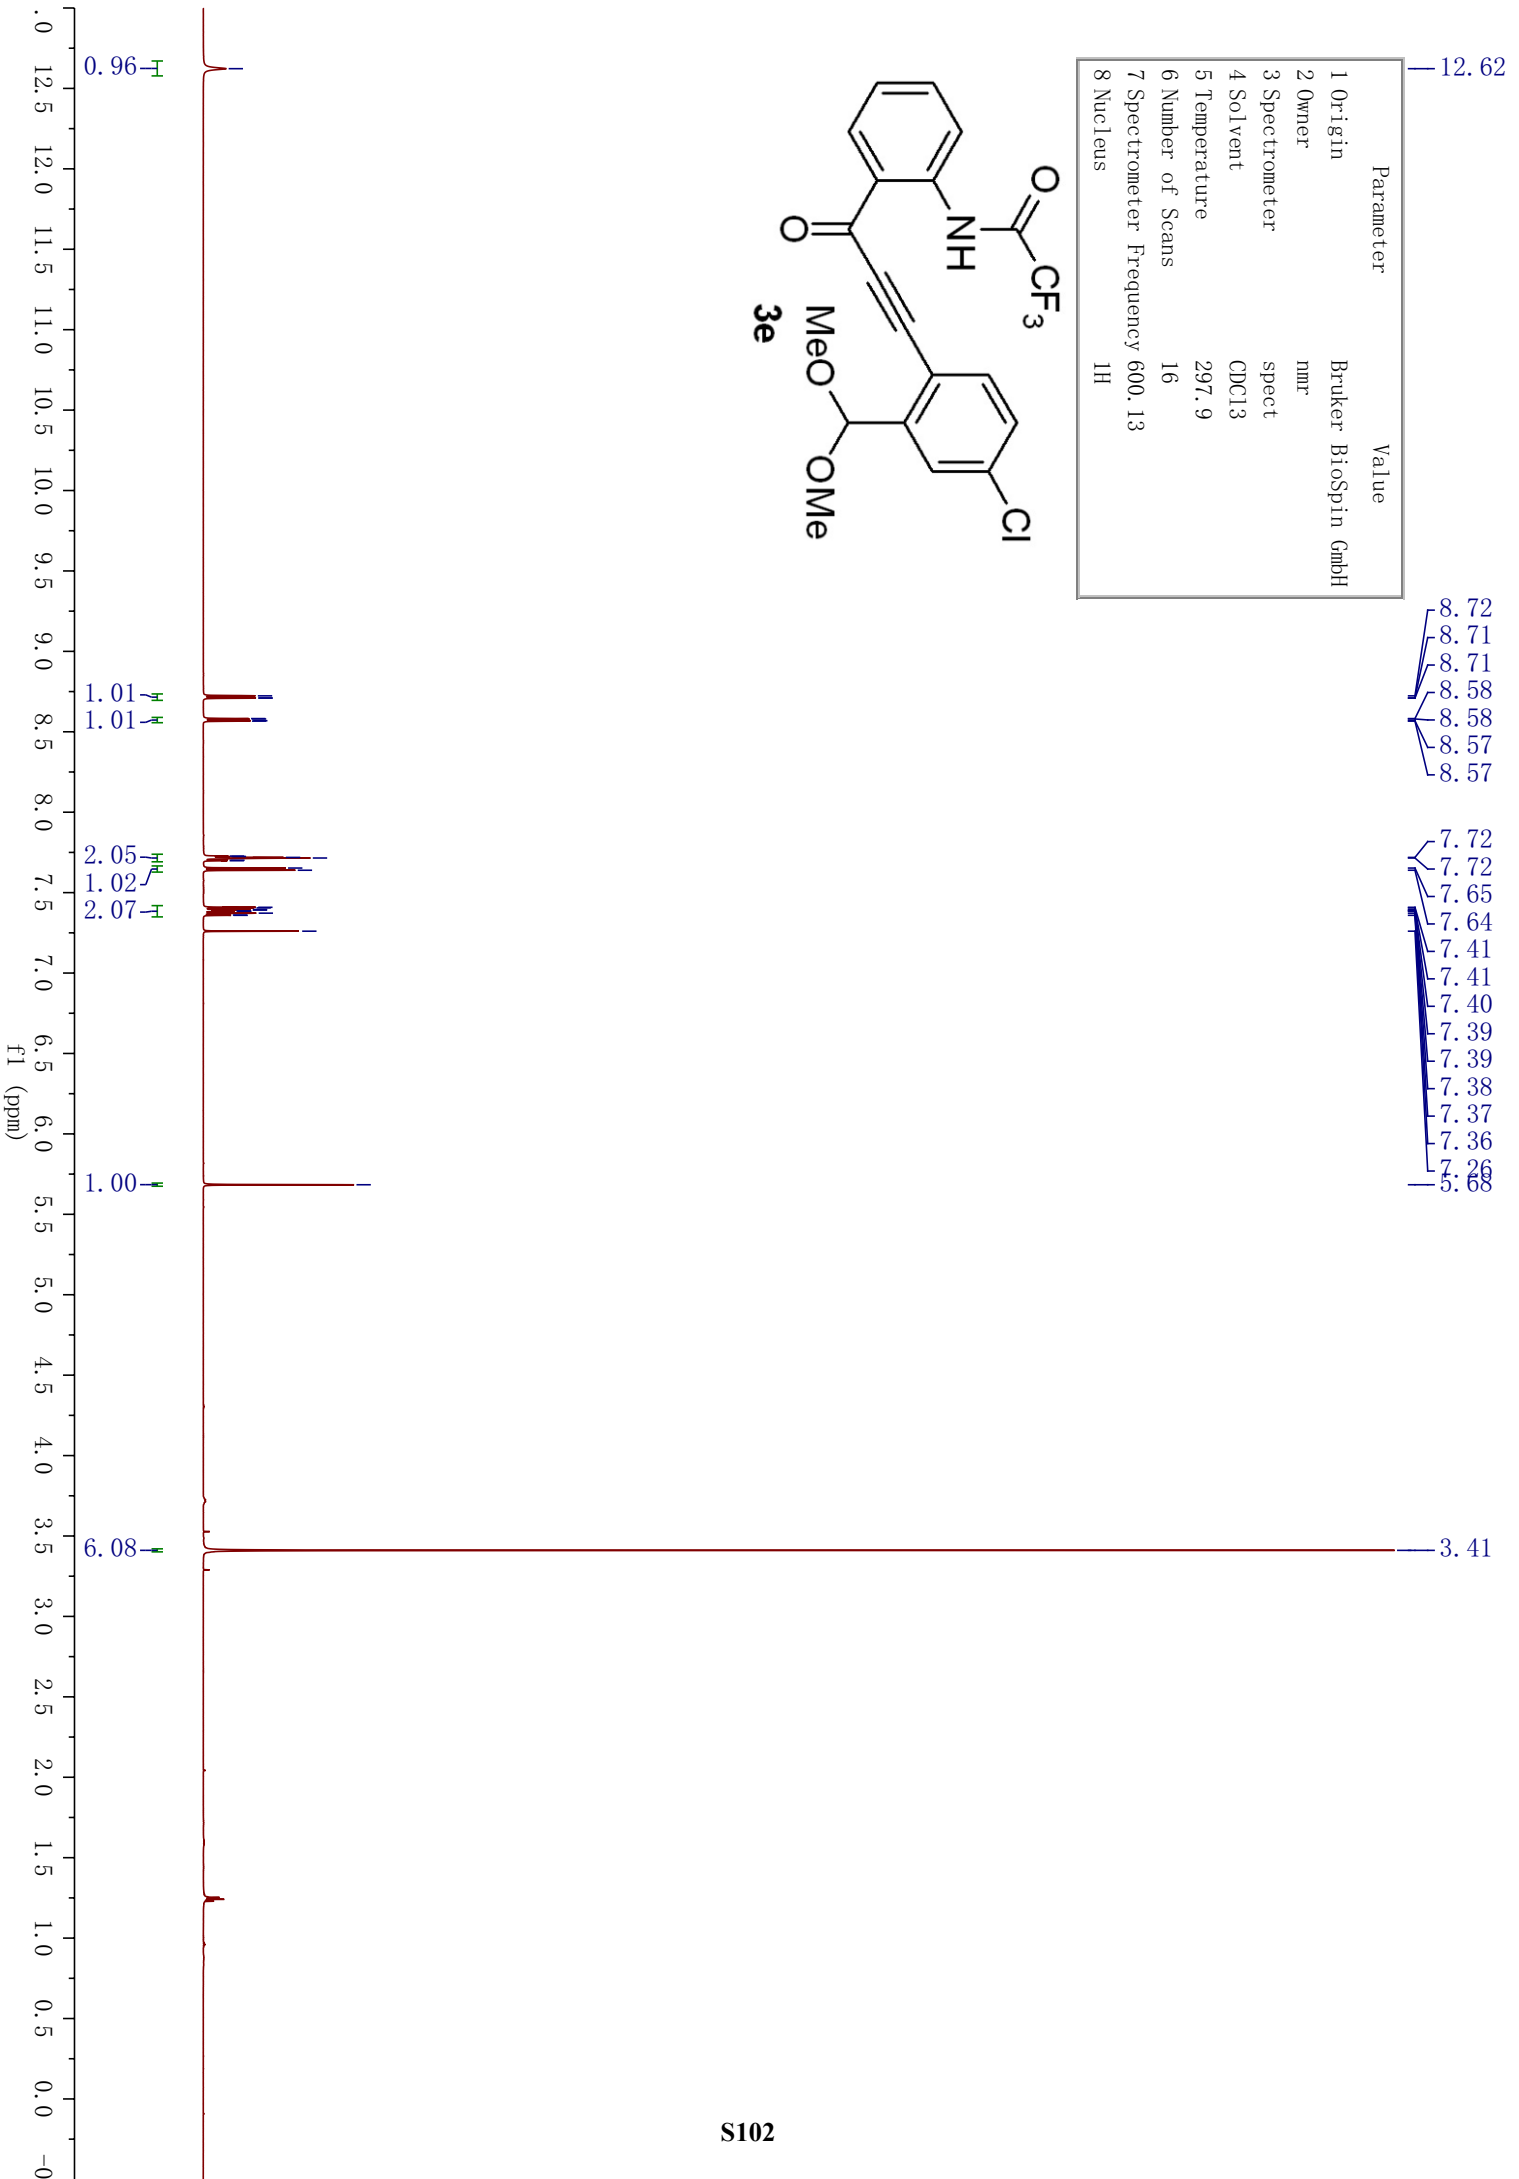

| Parameter                | Value               |
|--------------------------|---------------------|
| 1 Origin                 | Brüker Biospin GmbH |
| 2 Owner                  | nmr                 |
| 3 Spectrometer           | spect               |
| 4 Solvent                | CDCl3               |
| 5 Temperature            | 298, 1              |
| 6 Number of Scans        | 283                 |
| 7 Spectrometer Frequency | 150, 90             |
| 8 Nucleus                | <sup>13</sup> C     |

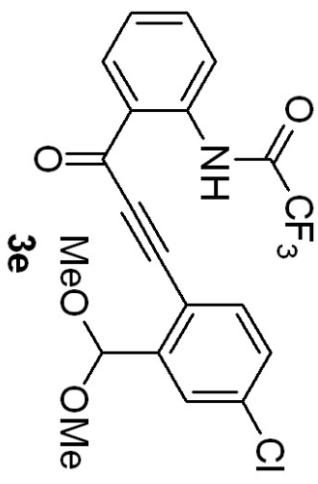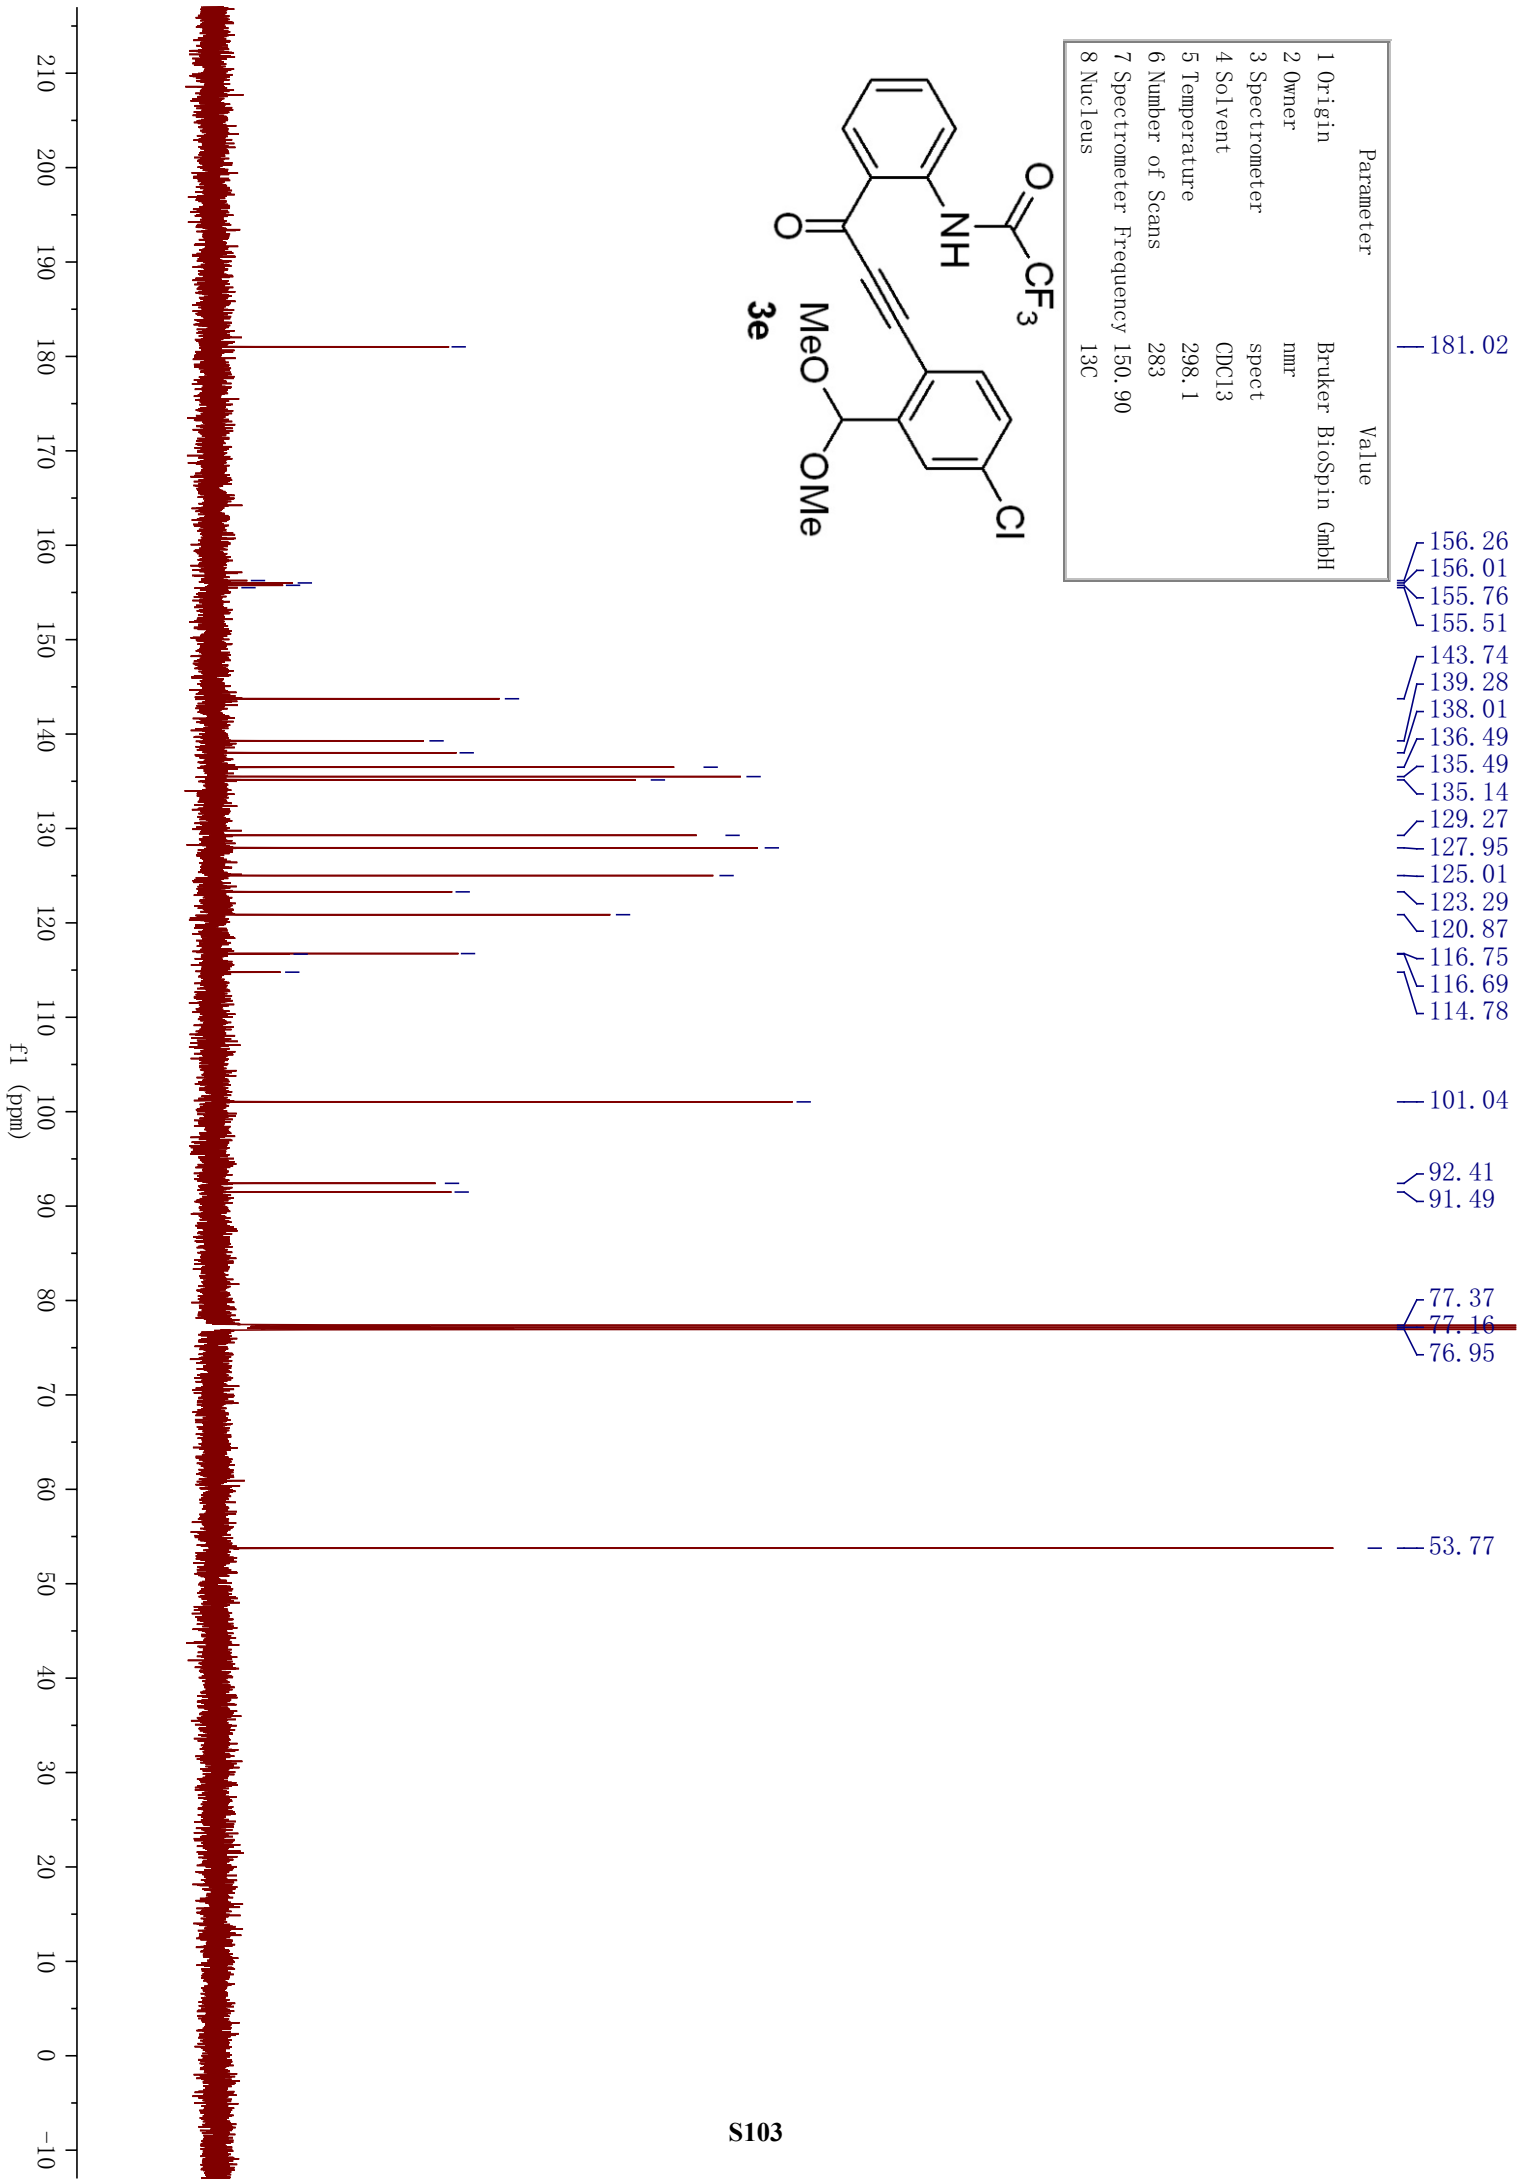

12.57

| Parameter                | Value               |
|--------------------------|---------------------|
| 1 Origin                 | Brüker Biospin GmbH |
| 2 Owner                  | nmr                 |
| 3 Spectrometer           | spect               |
| 4 Solvent                | CDCl3               |
| 5 Temperature            | 297.9               |
| 6 Number of Scans        | 16                  |
| 7 Spectrometer Frequency | 600.13              |
| 8 Nucleus                | <sup>1</sup> H      |

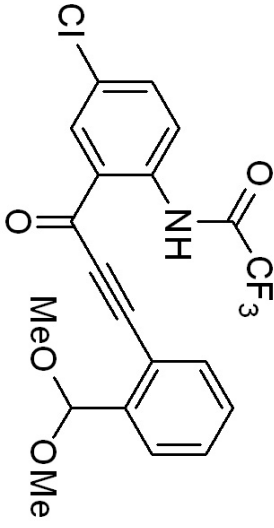

**3f**

8.69  
8.68  
8.68  
8.67  
7.73  
7.72  
7.71  
7.65  
7.64  
7.63  
7.63  
7.57  
7.55  
7.54  
7.44  
7.42  
7.41  
7.26  
5.73

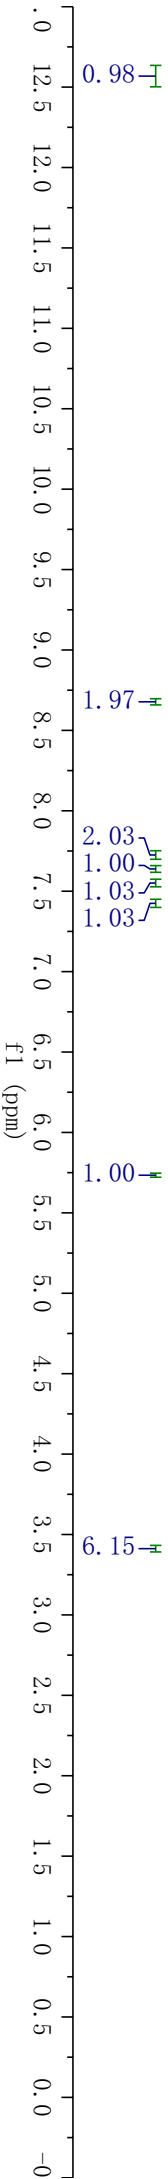

| Parameter                | Value               |
|--------------------------|---------------------|
| 1 Origin                 | Brüker BioSpin GmbH |
| 2 Owner                  | nmr                 |
| 3 Spectrometer           | spect               |
| 4 Solvent                | CDCl <sub>3</sub>   |
| 5 Temperature            | 297.9               |
| 6 Number of Scans        | 215                 |
| 7 Spectrometer Frequency | 150.90              |
| 8 Nucleus                | <sup>13</sup> C     |

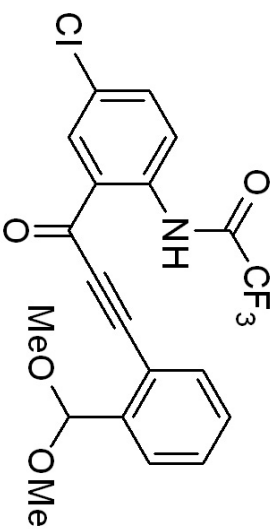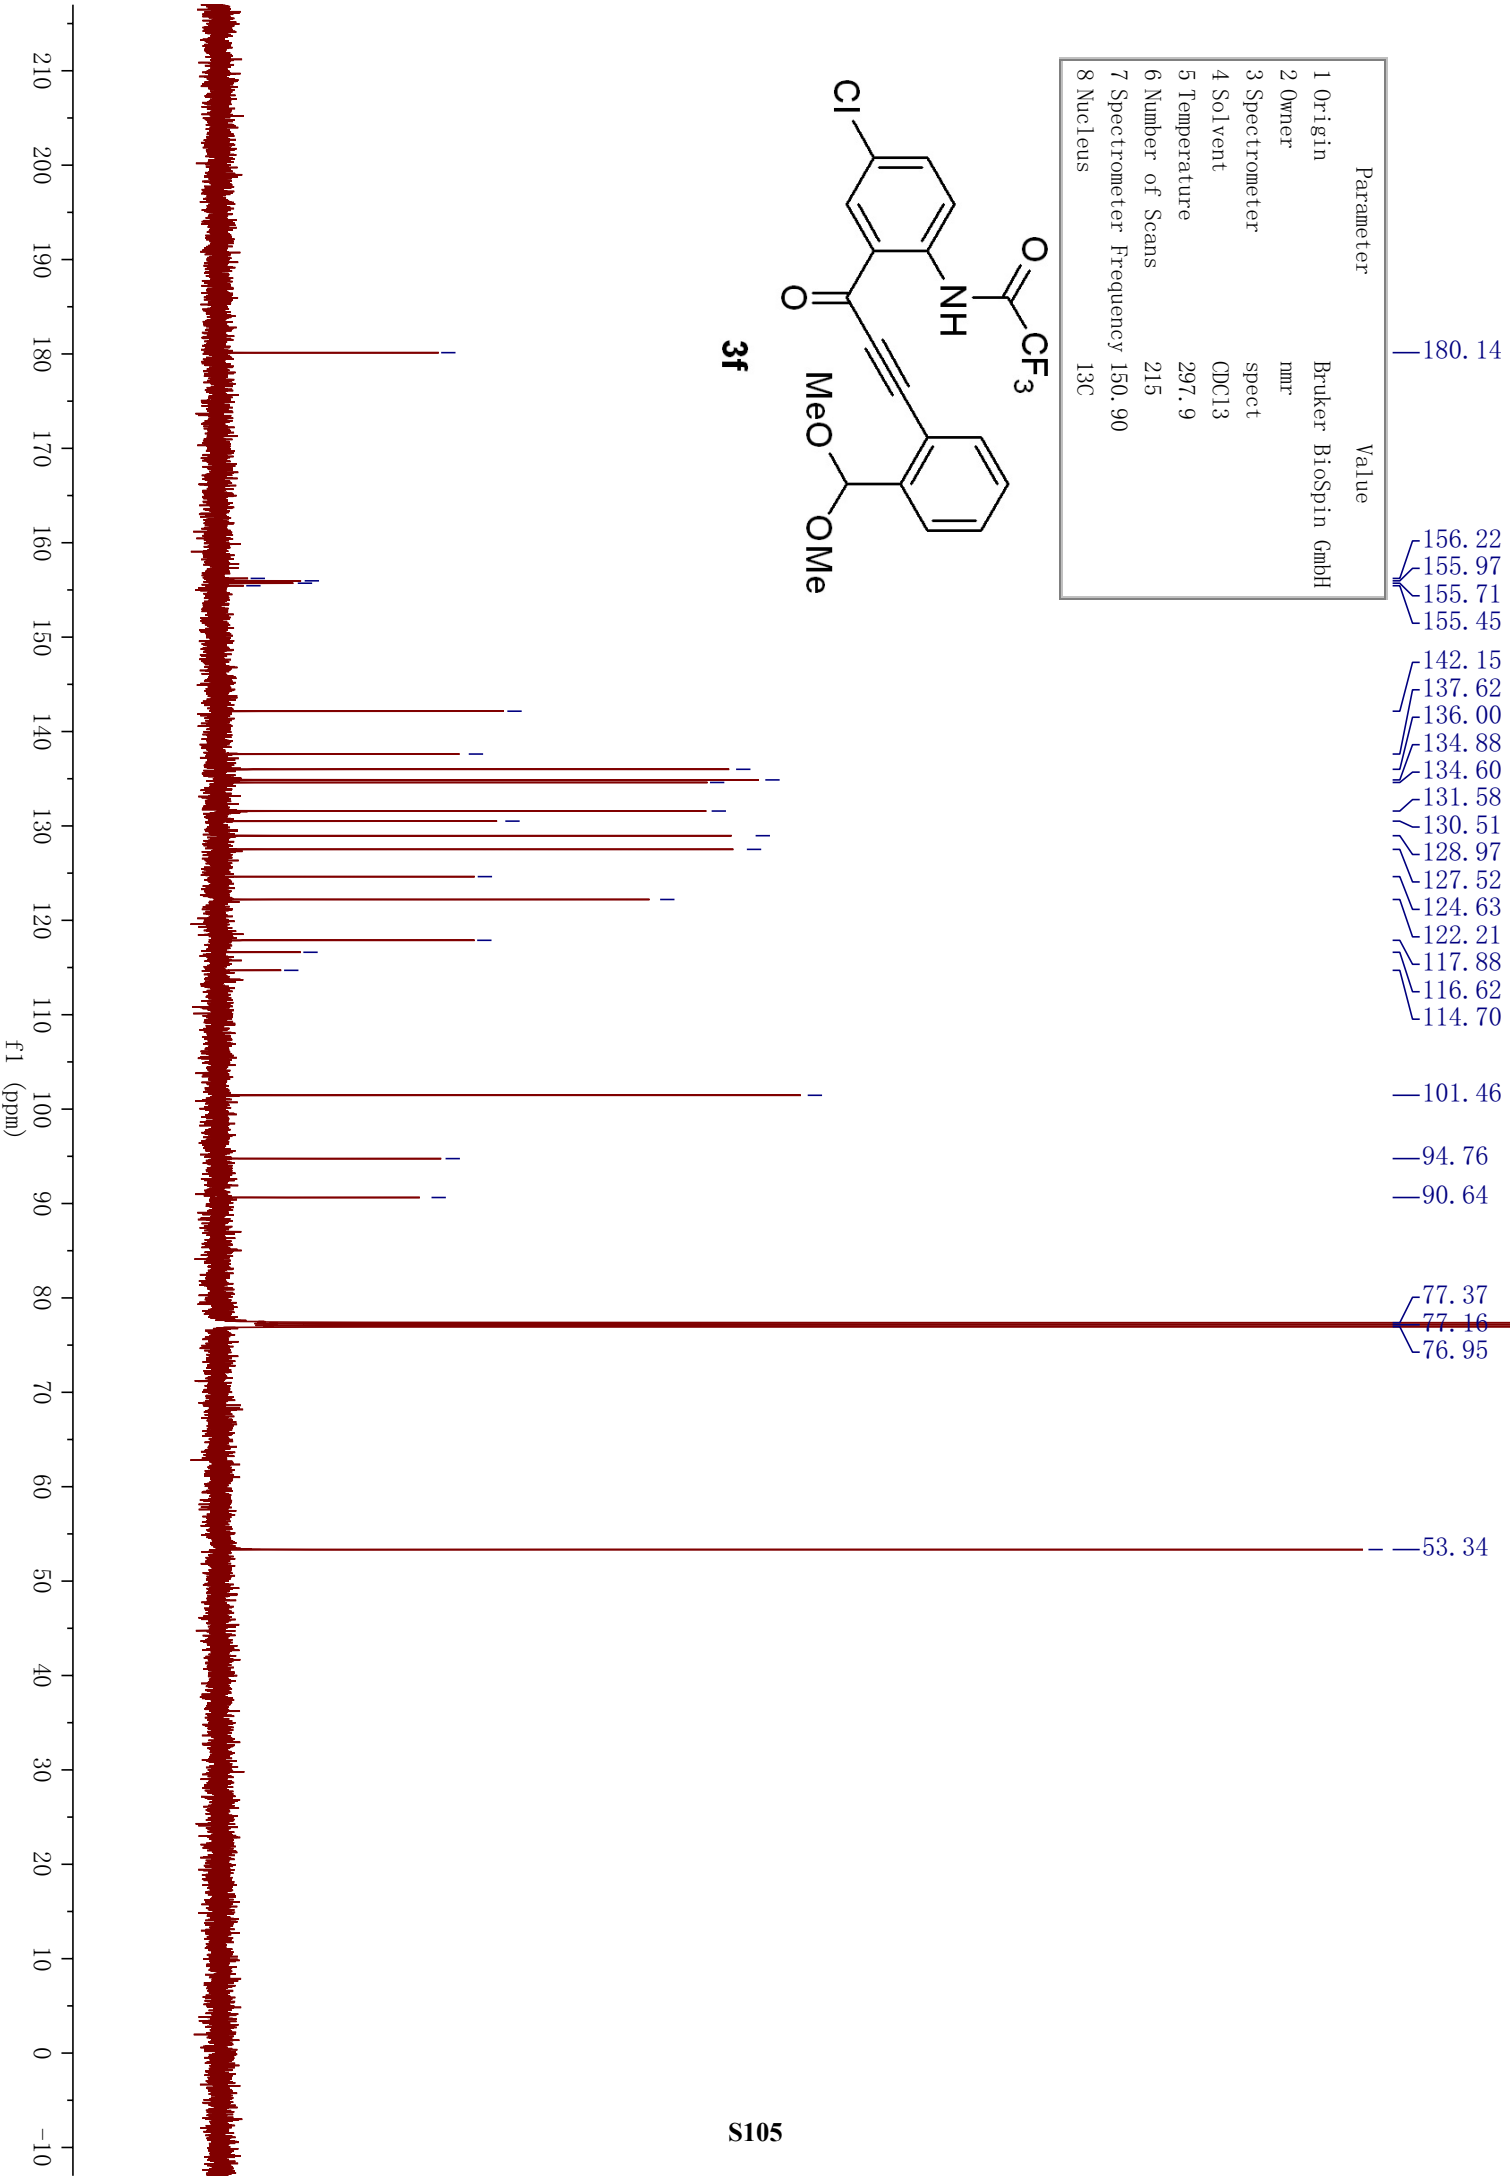

| Parameter                | Value                |
|--------------------------|----------------------|
| 1 Origin                 | Brucker Biospin GmbH |
| 2 Owner                  | nmr                  |
| 3 Spectrometer           | spect                |
| 4 Solvent                | CDCl3                |
| 5 Temperature            | 297.9                |
| 6 Number of Scans        | 16                   |
| 7 Spectrometer Frequency | 600.13               |
| 8 Nucleus                | <sup>1</sup> H       |

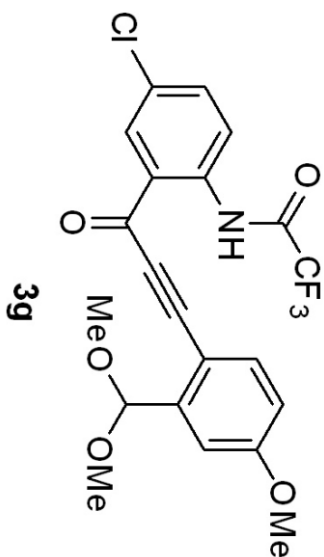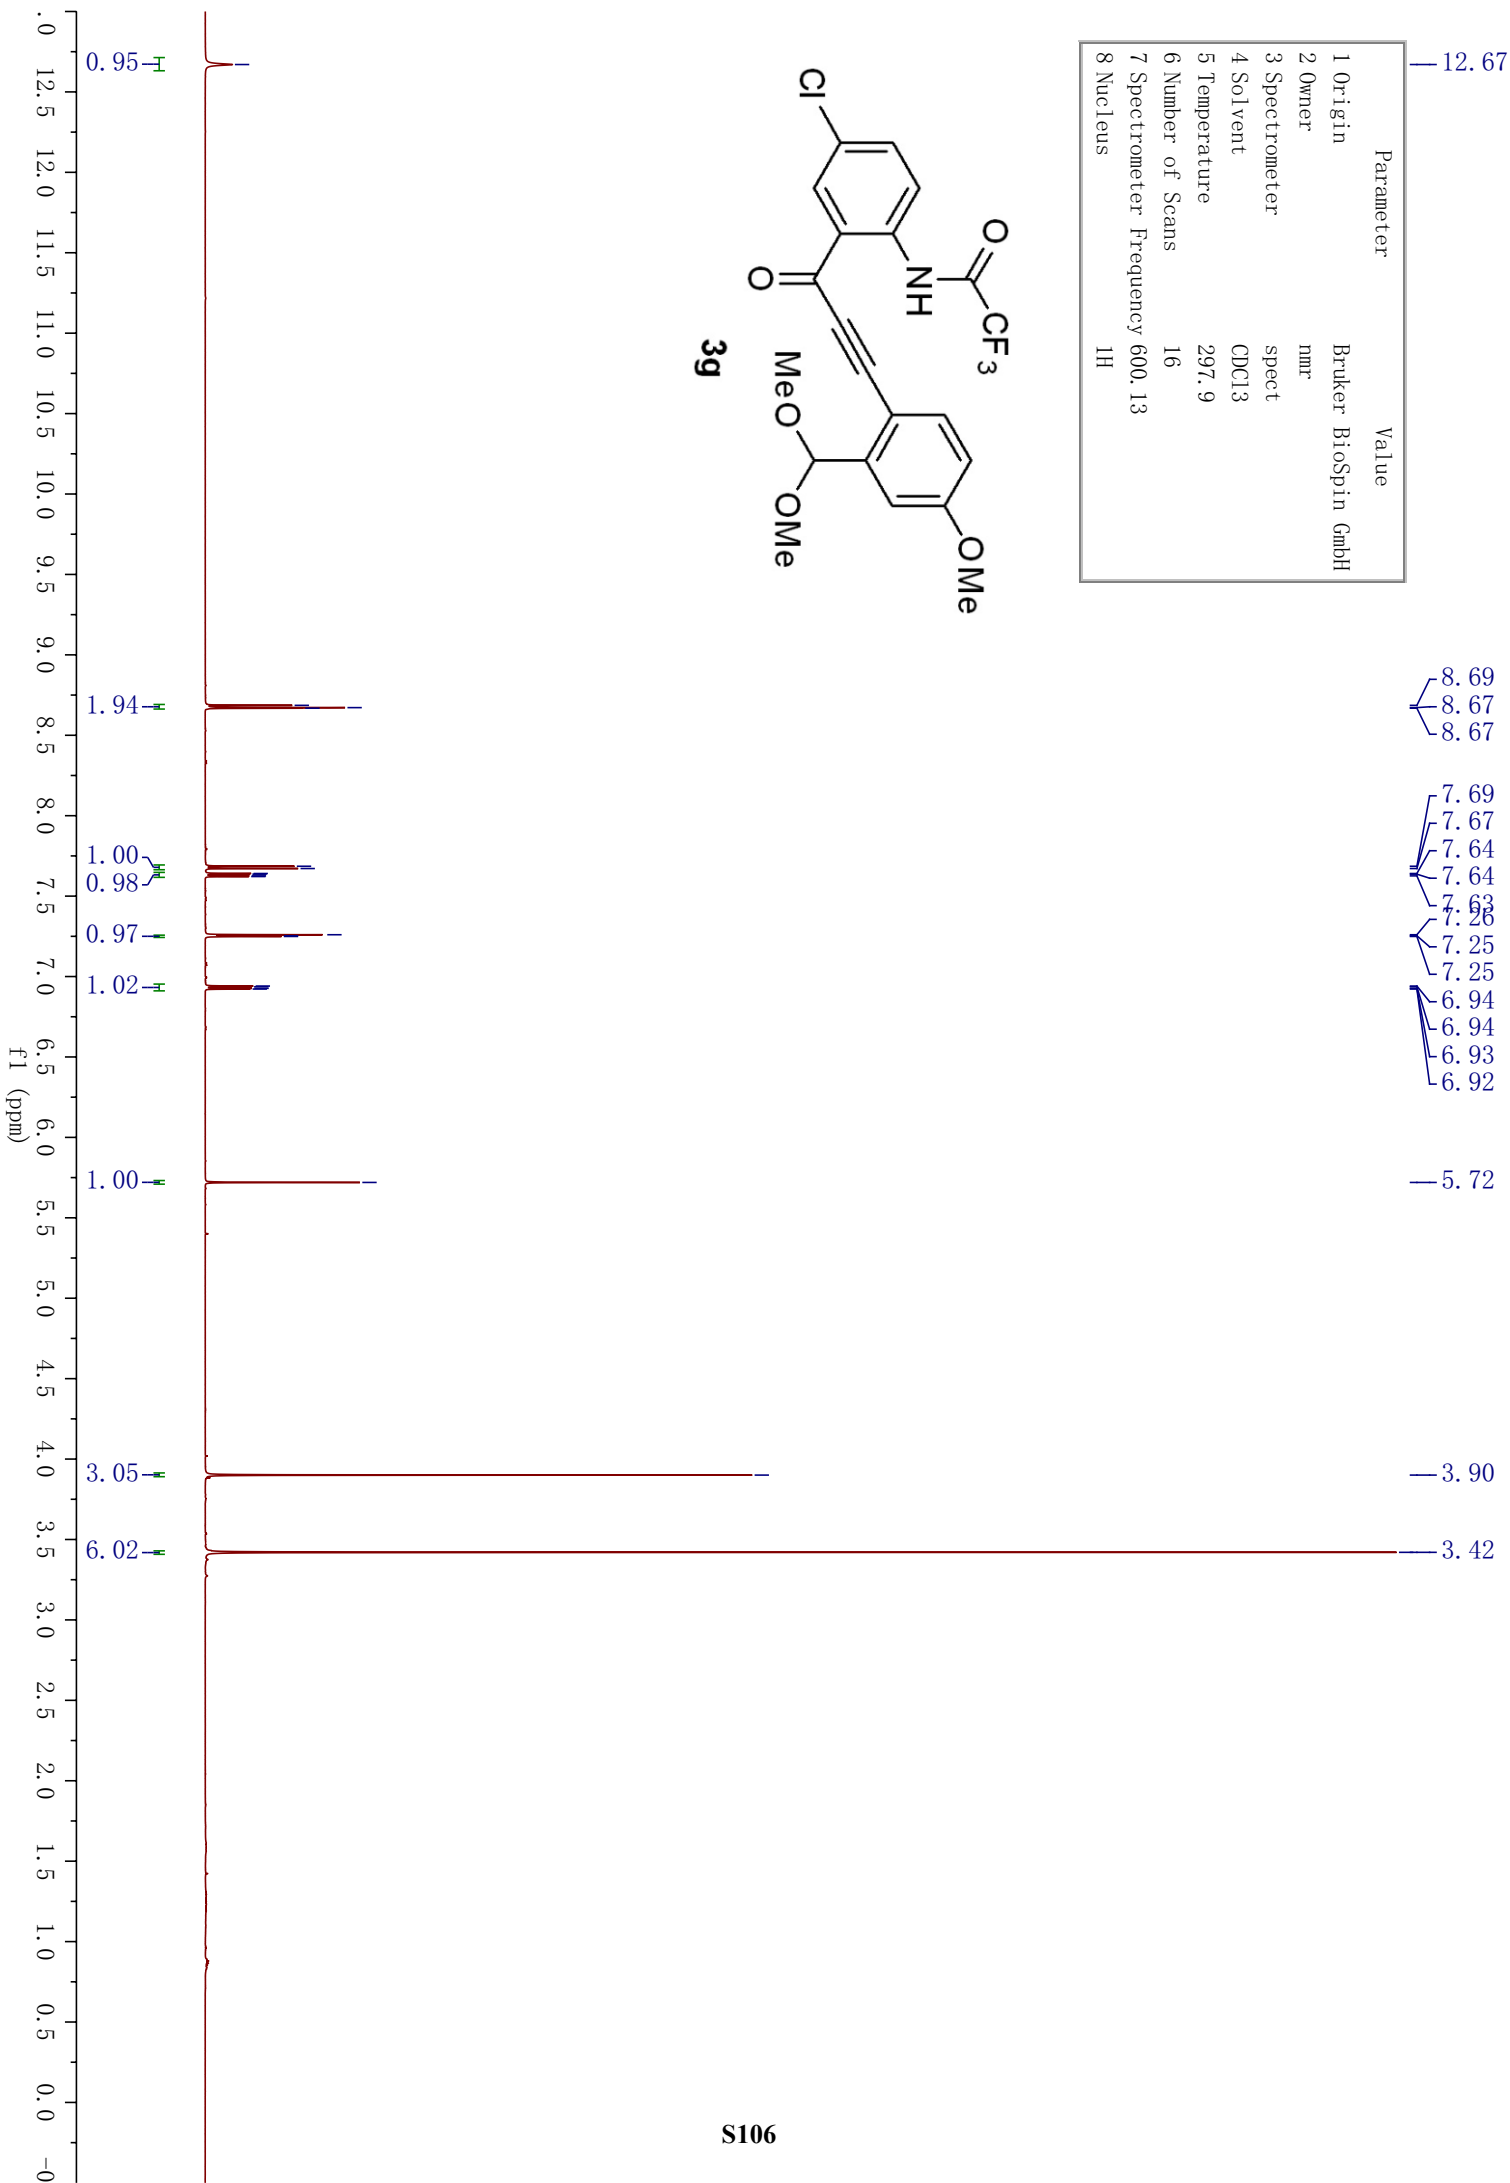

| Parameter                | Value                |
|--------------------------|----------------------|
| 1 Origin                 | Brucker Biospin GmbH |
| 2 Owner                  | nmr                  |
| 3 Spectrometer           | spect                |
| 4 Solvent                | CDCl3                |
| 5 Temperature            | 297.9                |
| 6 Number of Scans        | 358                  |
| 7 Spectrometer Frequency | 150.90               |
| 8 Nucleus                | <sup>13</sup> C      |

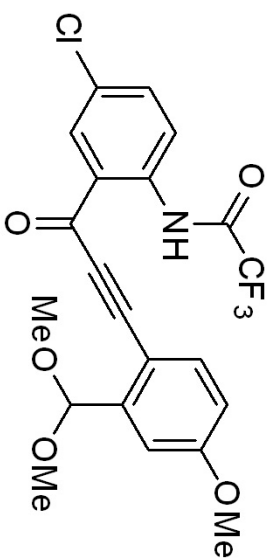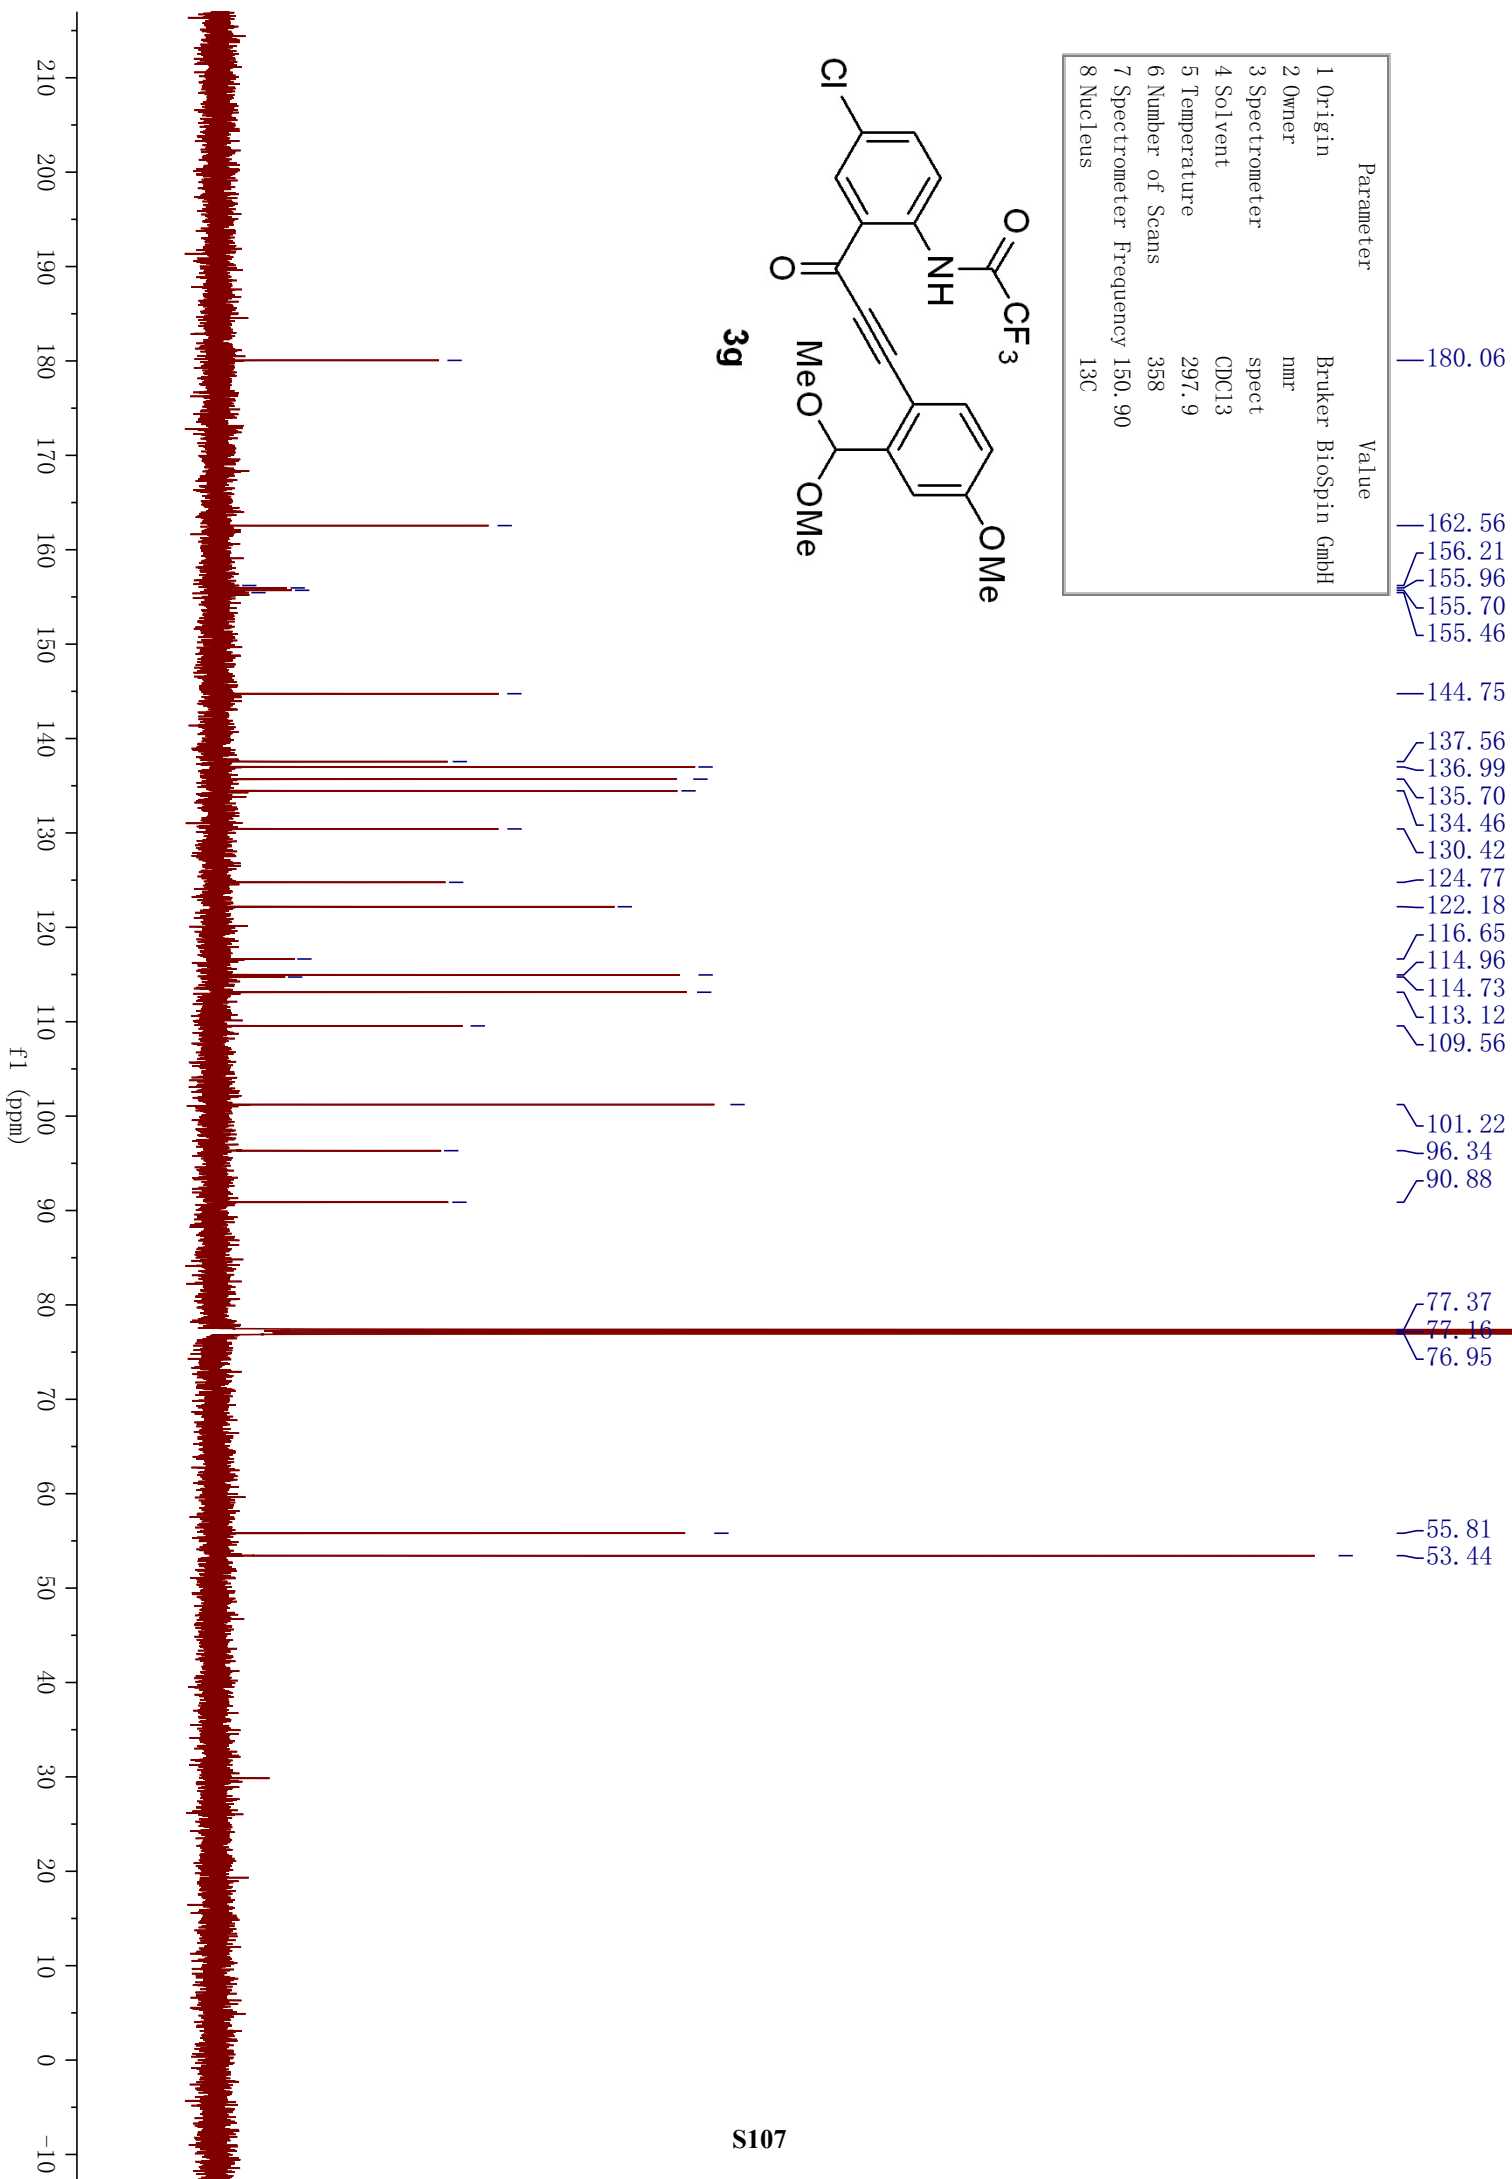



12.78

| Parameter                | Value                |
|--------------------------|----------------------|
| 1 Origin                 | Brucker BioSpin GmbH |
| 2 Owner                  | nmr                  |
| 3 Spectrometer           | spect                |
| 4 Solvent                | CDCl3                |
| 5 Temperature            | 297.9                |
| 6 Number of Scans        | 16                   |
| 7 Spectrometer Frequency | 600.13               |
| 8 Nucleus                | <sup>1</sup> H       |

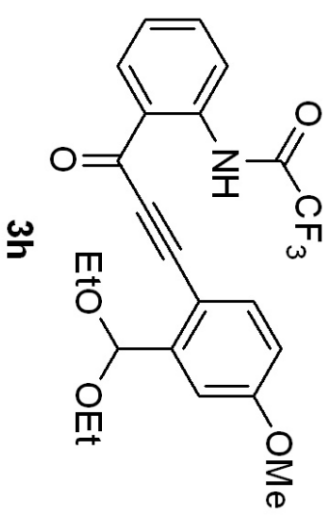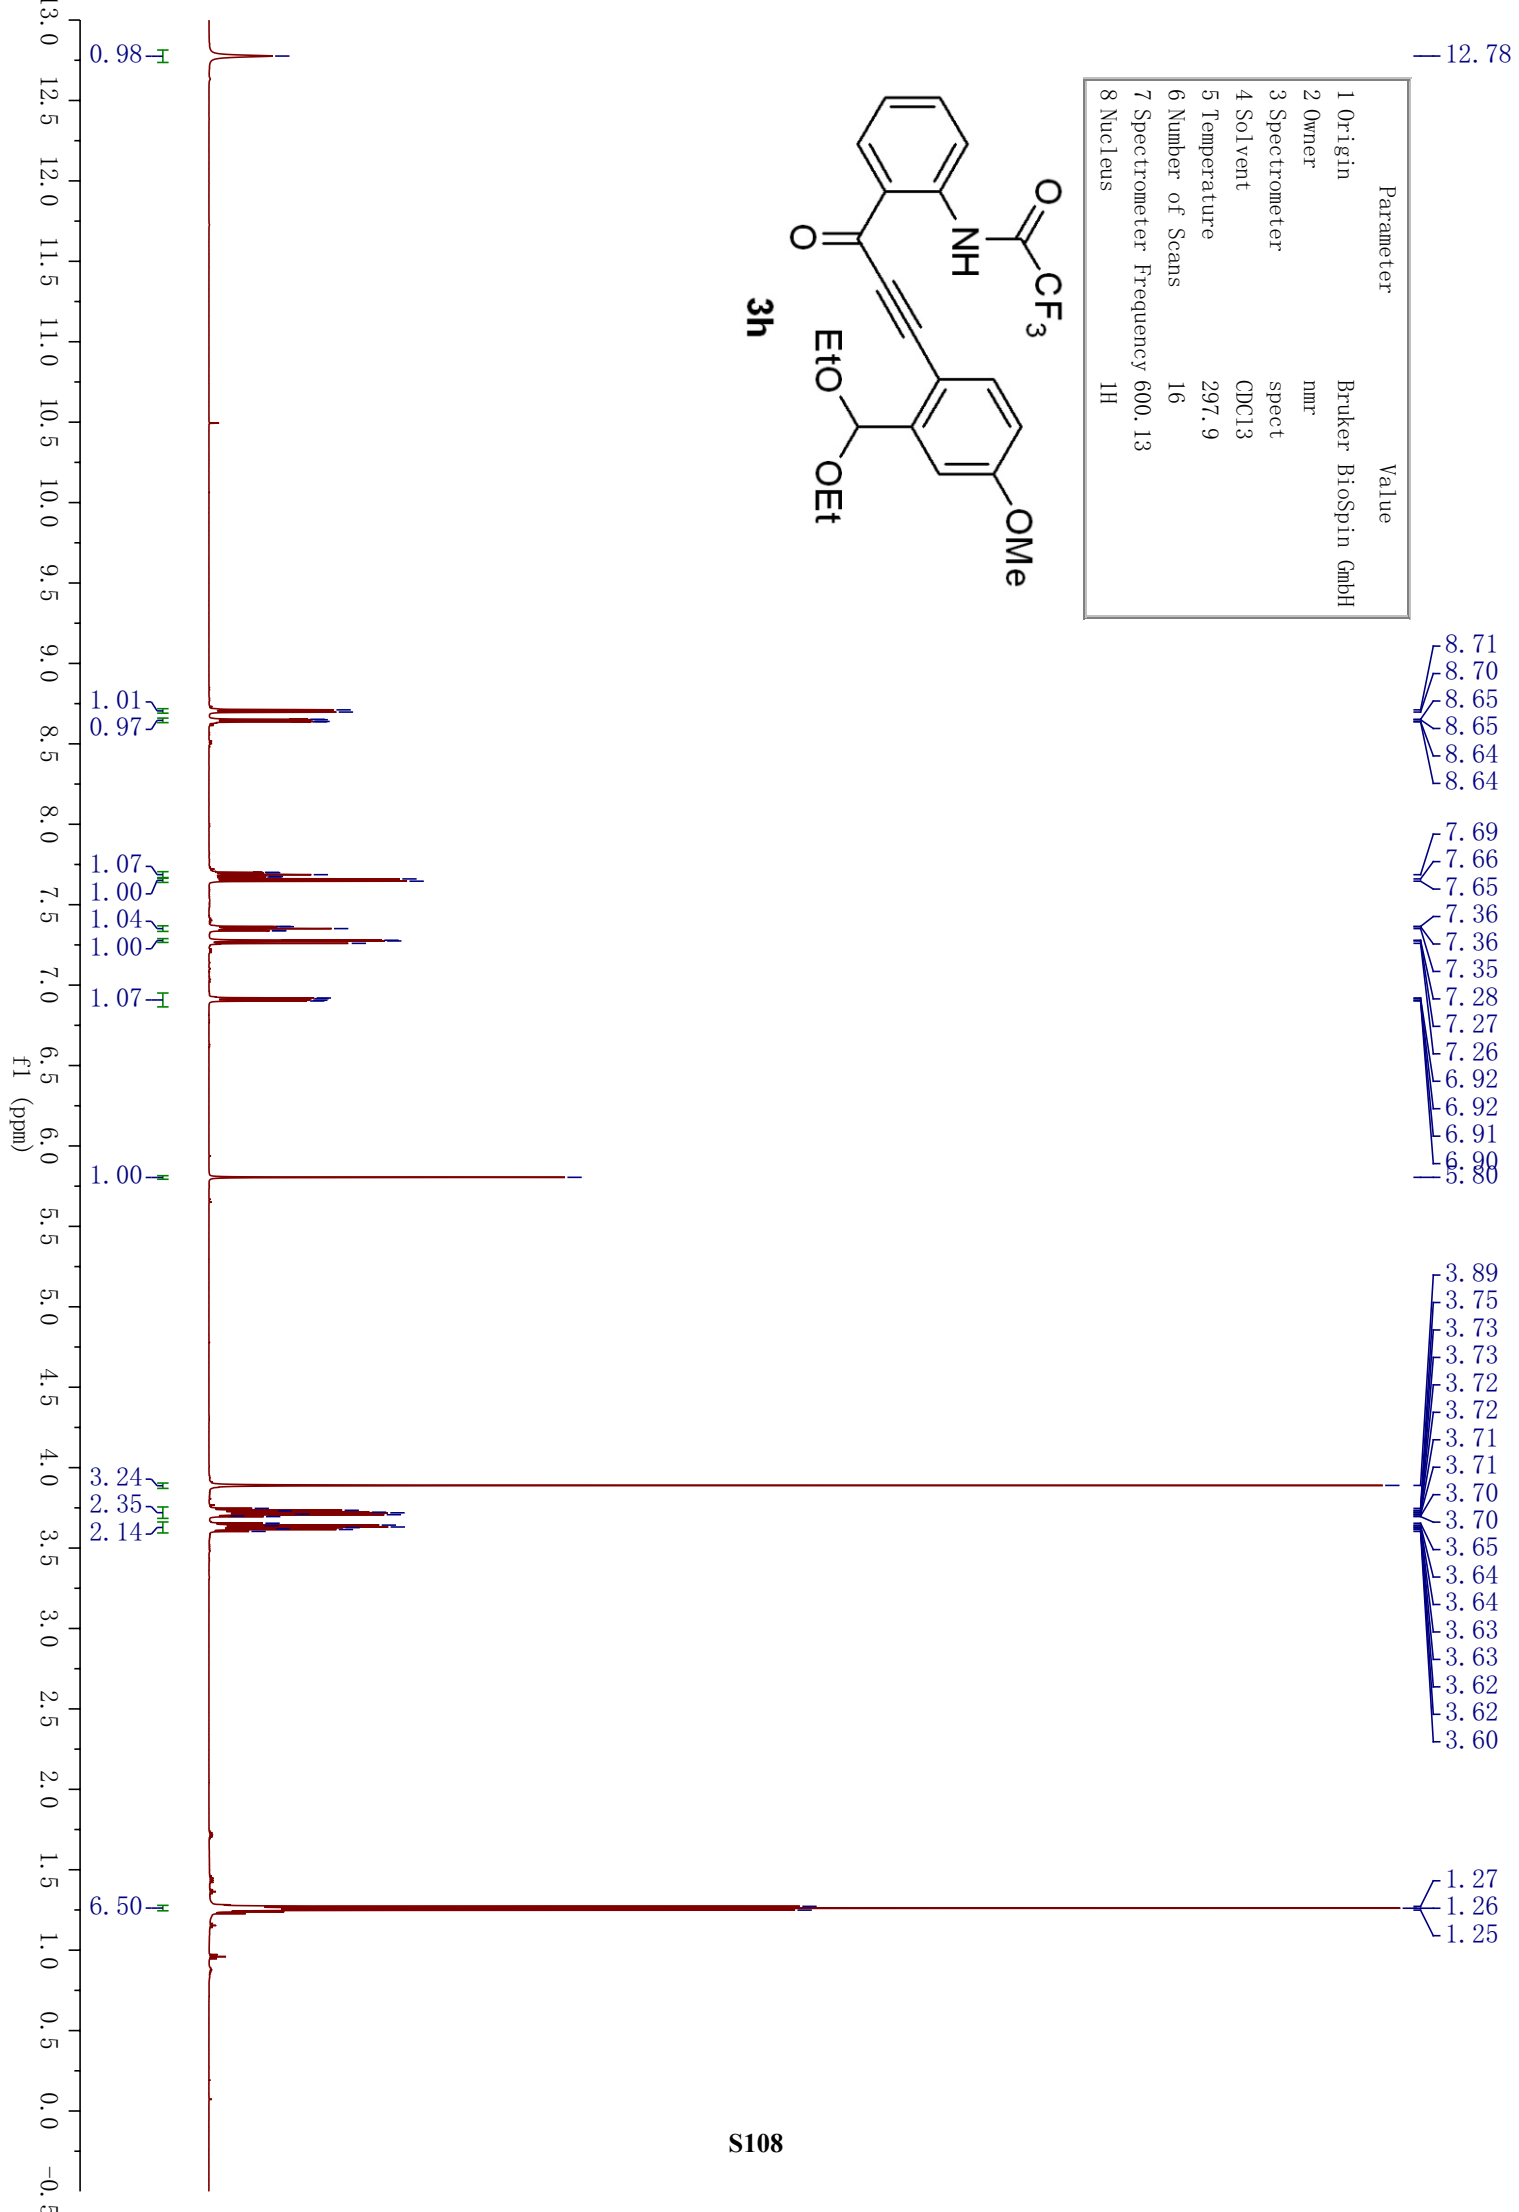

| Parameter                | Value               |
|--------------------------|---------------------|
| 1 Origin                 | Brüker Biospin GmbH |
| 2 Owner                  | nmr                 |
| 3 Spectrometer           | spect               |
| 4 Solvent                | CDCl3               |
| 5 Temperature            | 282.5               |
| 6 Number of Scans        | 634                 |
| 7 Spectrometer Frequency | 150.90              |
| 8 Nucleus                | <sup>13</sup> C     |

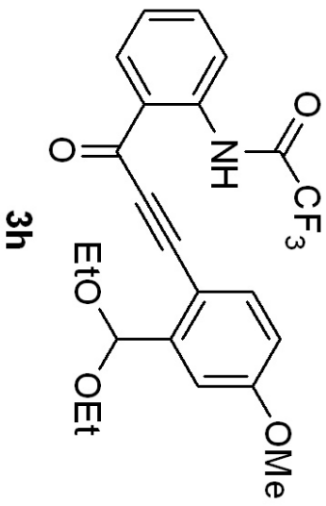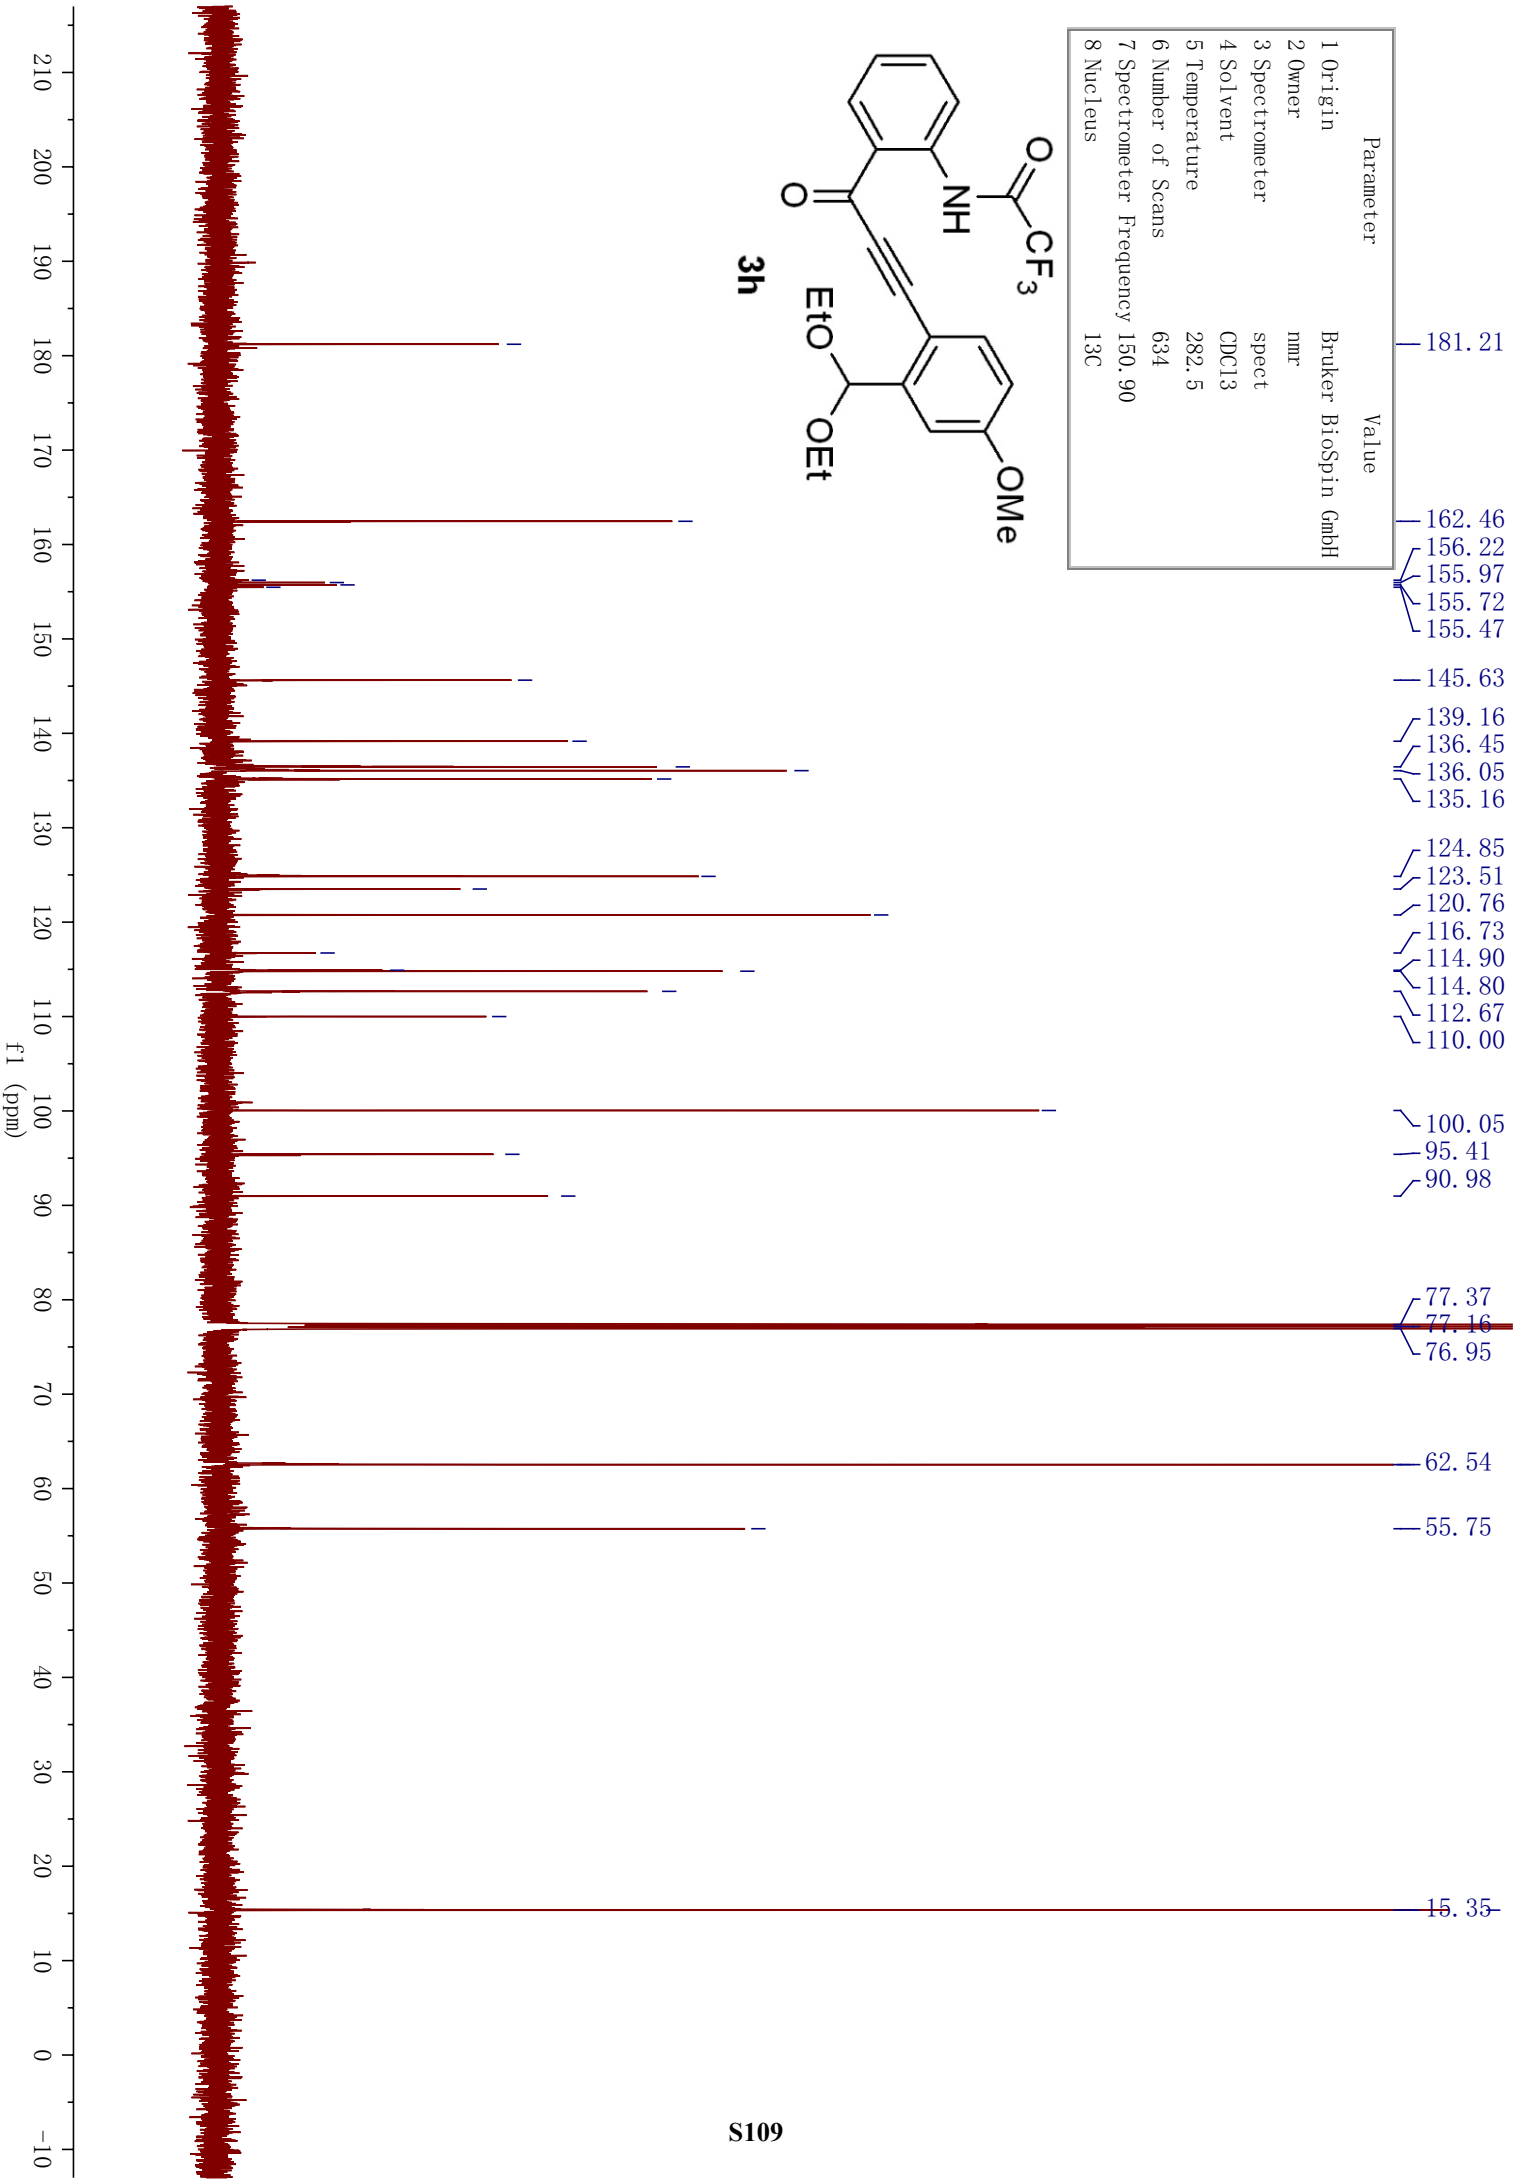

| Parameter                | Value               |
|--------------------------|---------------------|
| 1 Origin                 | Brüker BioSpin GmbH |
| 2 Owner                  | nmr                 |
| 3 Spectrometer           | spect               |
| 4 Solvent                | CDCl3               |
| 5 Temperature            | 297.9               |
| 6 Number of Scans        | 16                  |
| 7 Spectrometer Frequency | 600.13              |
| 8 Nucleus                | <sup>1</sup> H      |

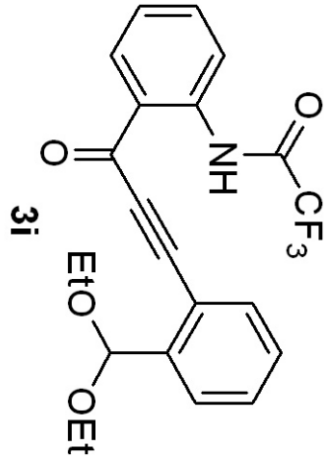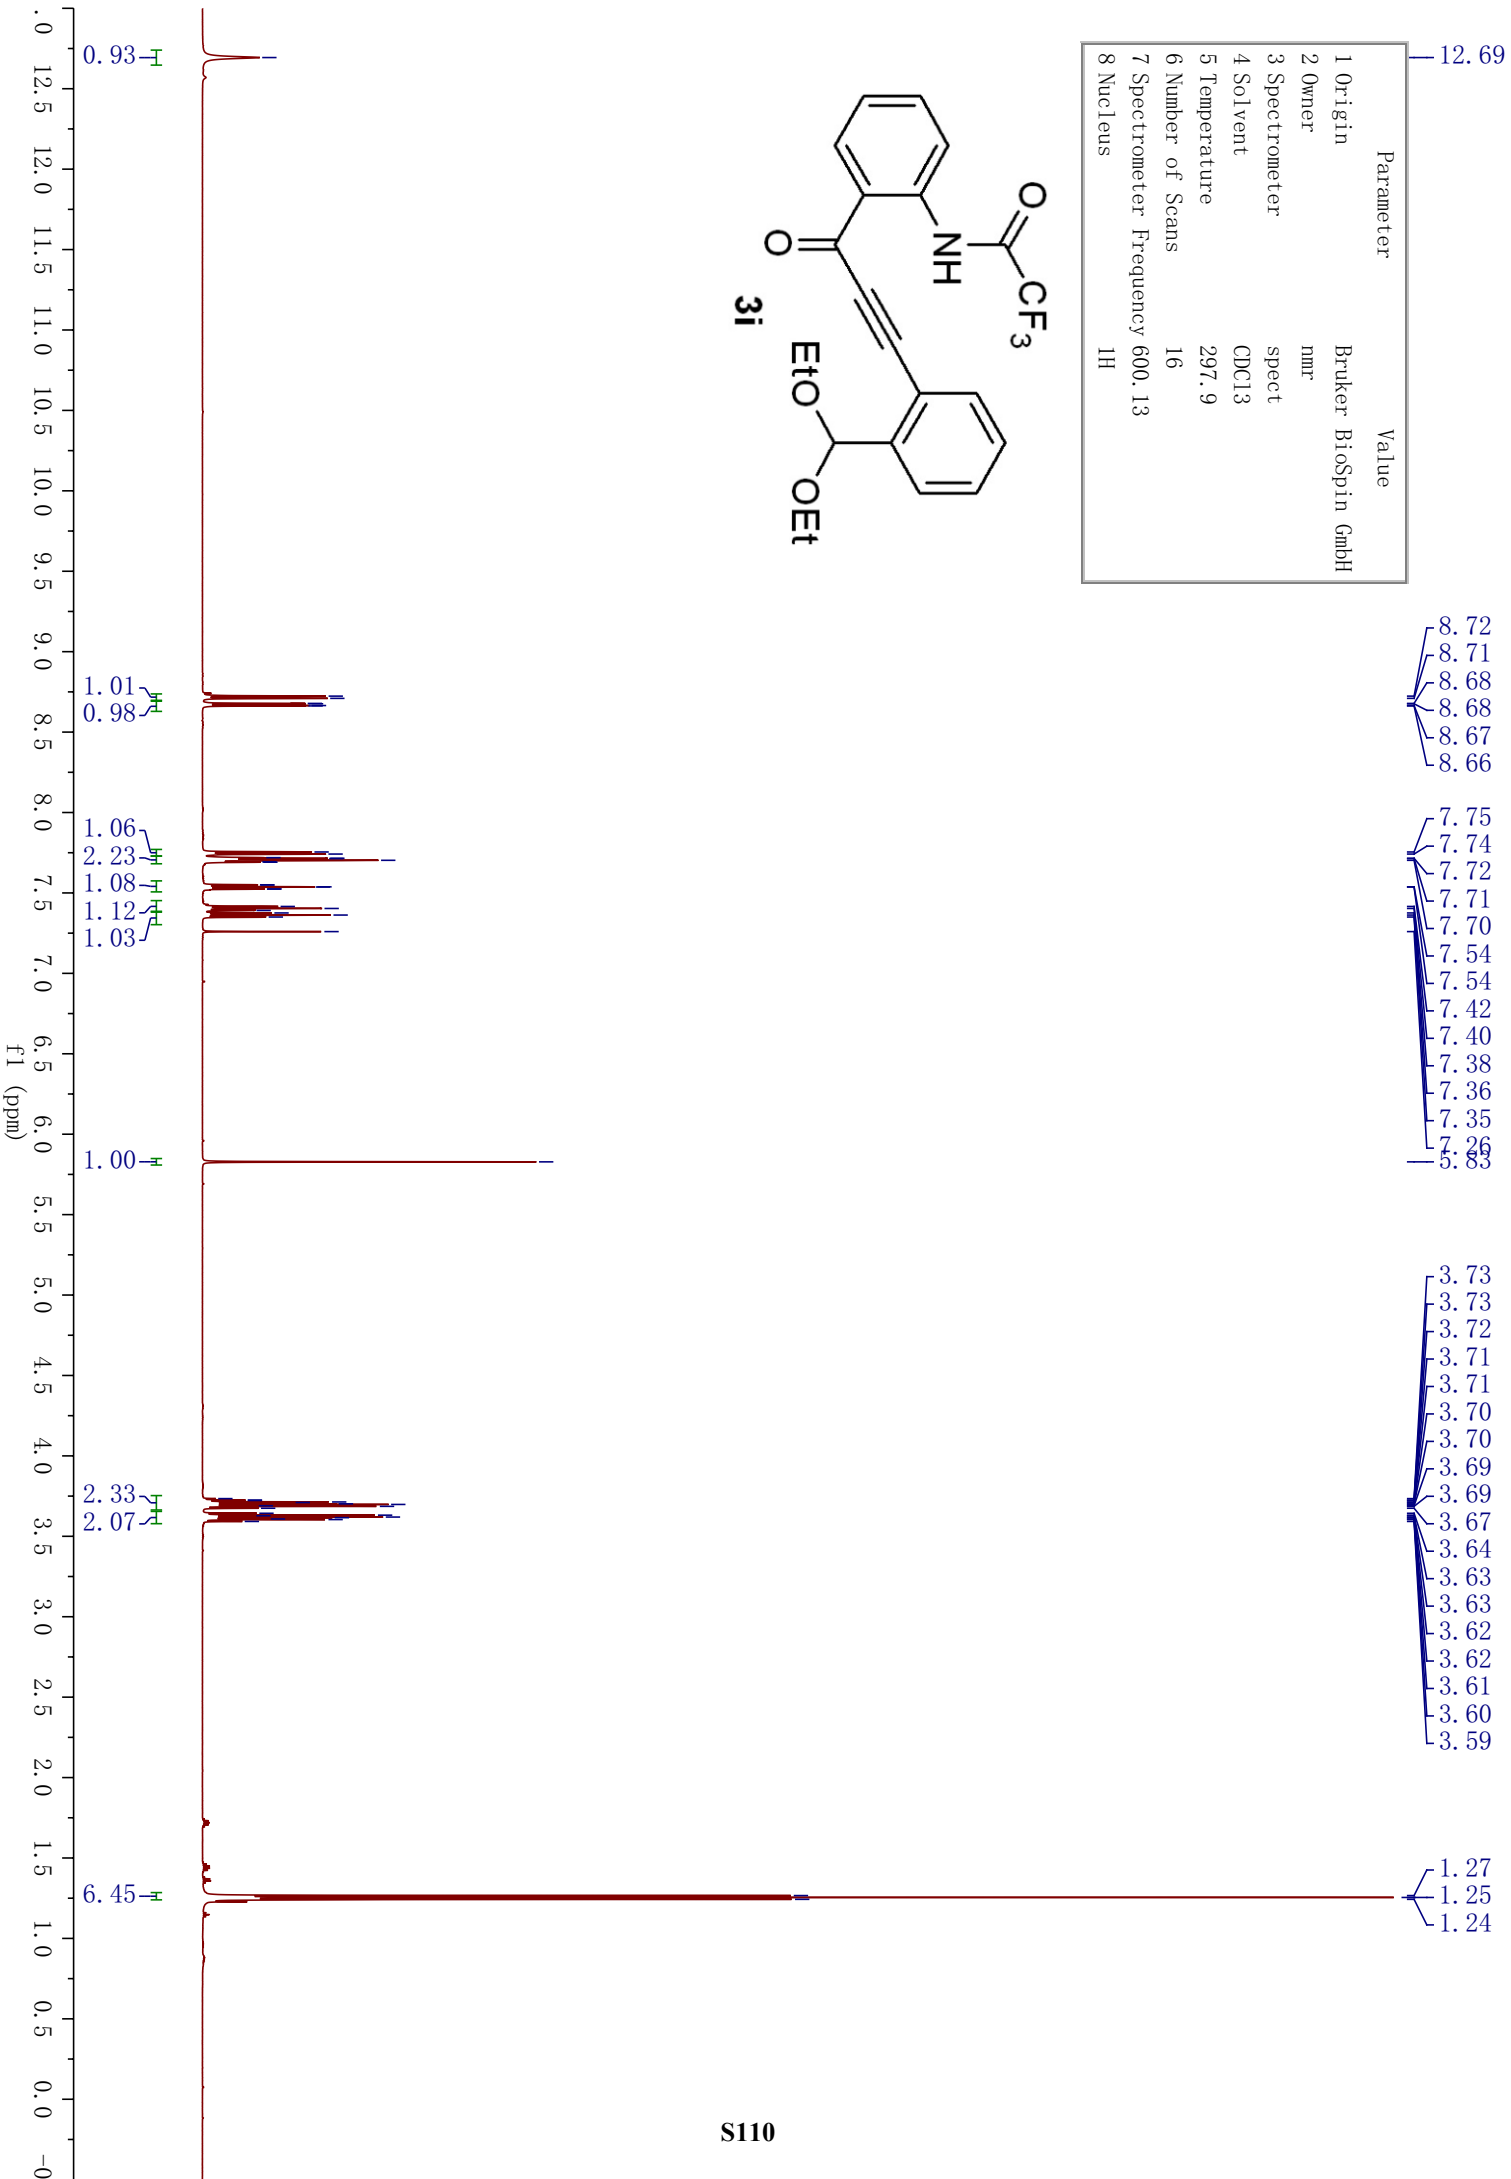

| Parameter                | Value               |
|--------------------------|---------------------|
| 1 Origin                 | 181.26              |
| 2 Owner                  | Bruker Biospin GmbH |
| 3 Spectrometer           | nmr spect           |
| 4 Solvent                | CDCl3               |
| 5 Temperature            | 298.0               |
| 6 Number of Scans        | 288                 |
| 7 Spectrometer Frequency | 150.90              |
| 8 Nucleus                | <sup>13</sup> C     |

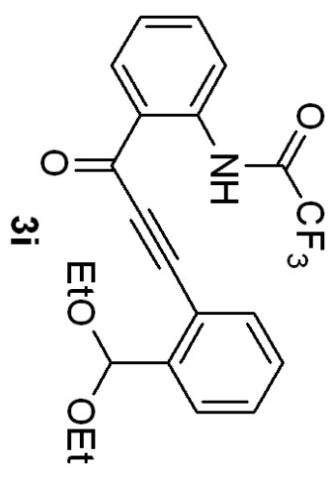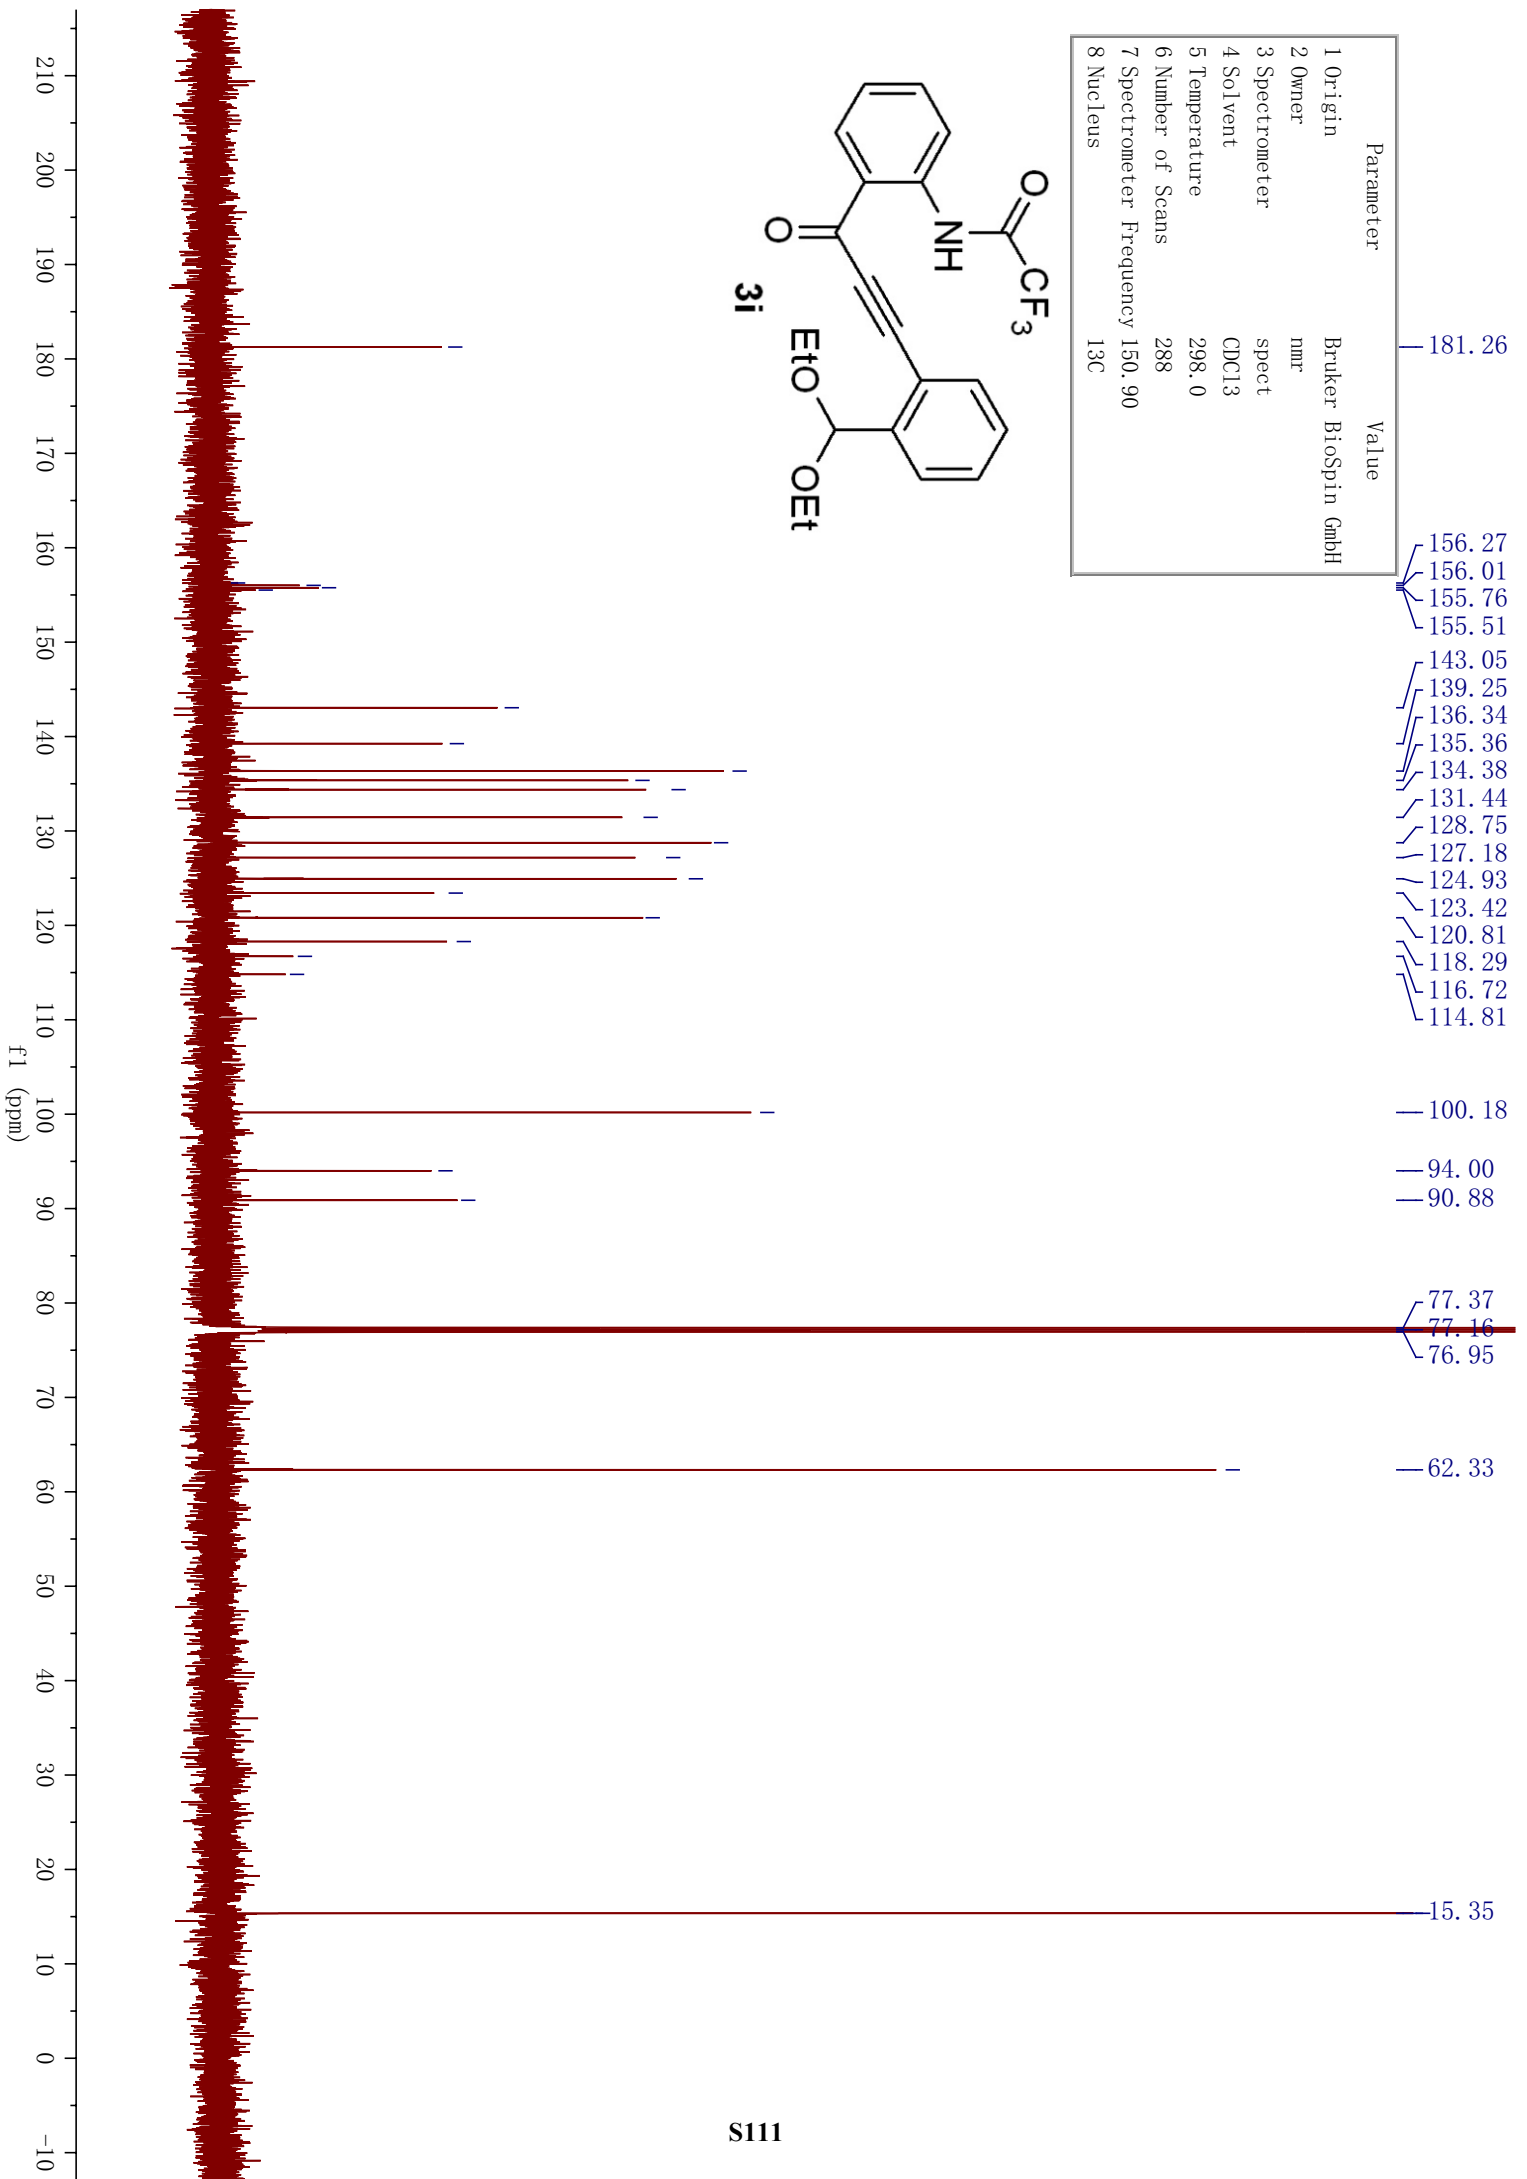

| Parameter                | Value                |
|--------------------------|----------------------|
| 1 Origin                 | Brucker Biospin GmbH |
| 2 Owner                  | nmr                  |
| 3 Spectrometer           | spect                |
| 4 Solvent                | CDCl3                |
| 5 Temperature            | 297.9                |
| 6 Number of Scans        | 16                   |
| 7 Spectrometer Frequency | 600.13               |
| 8 Nucleus                | <sup>1</sup> H       |

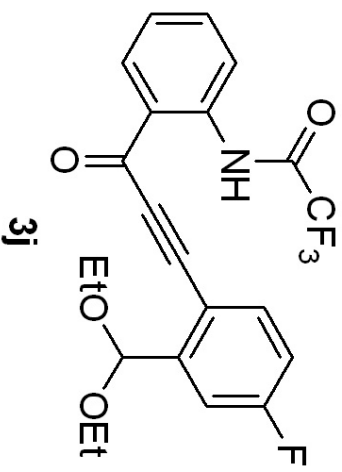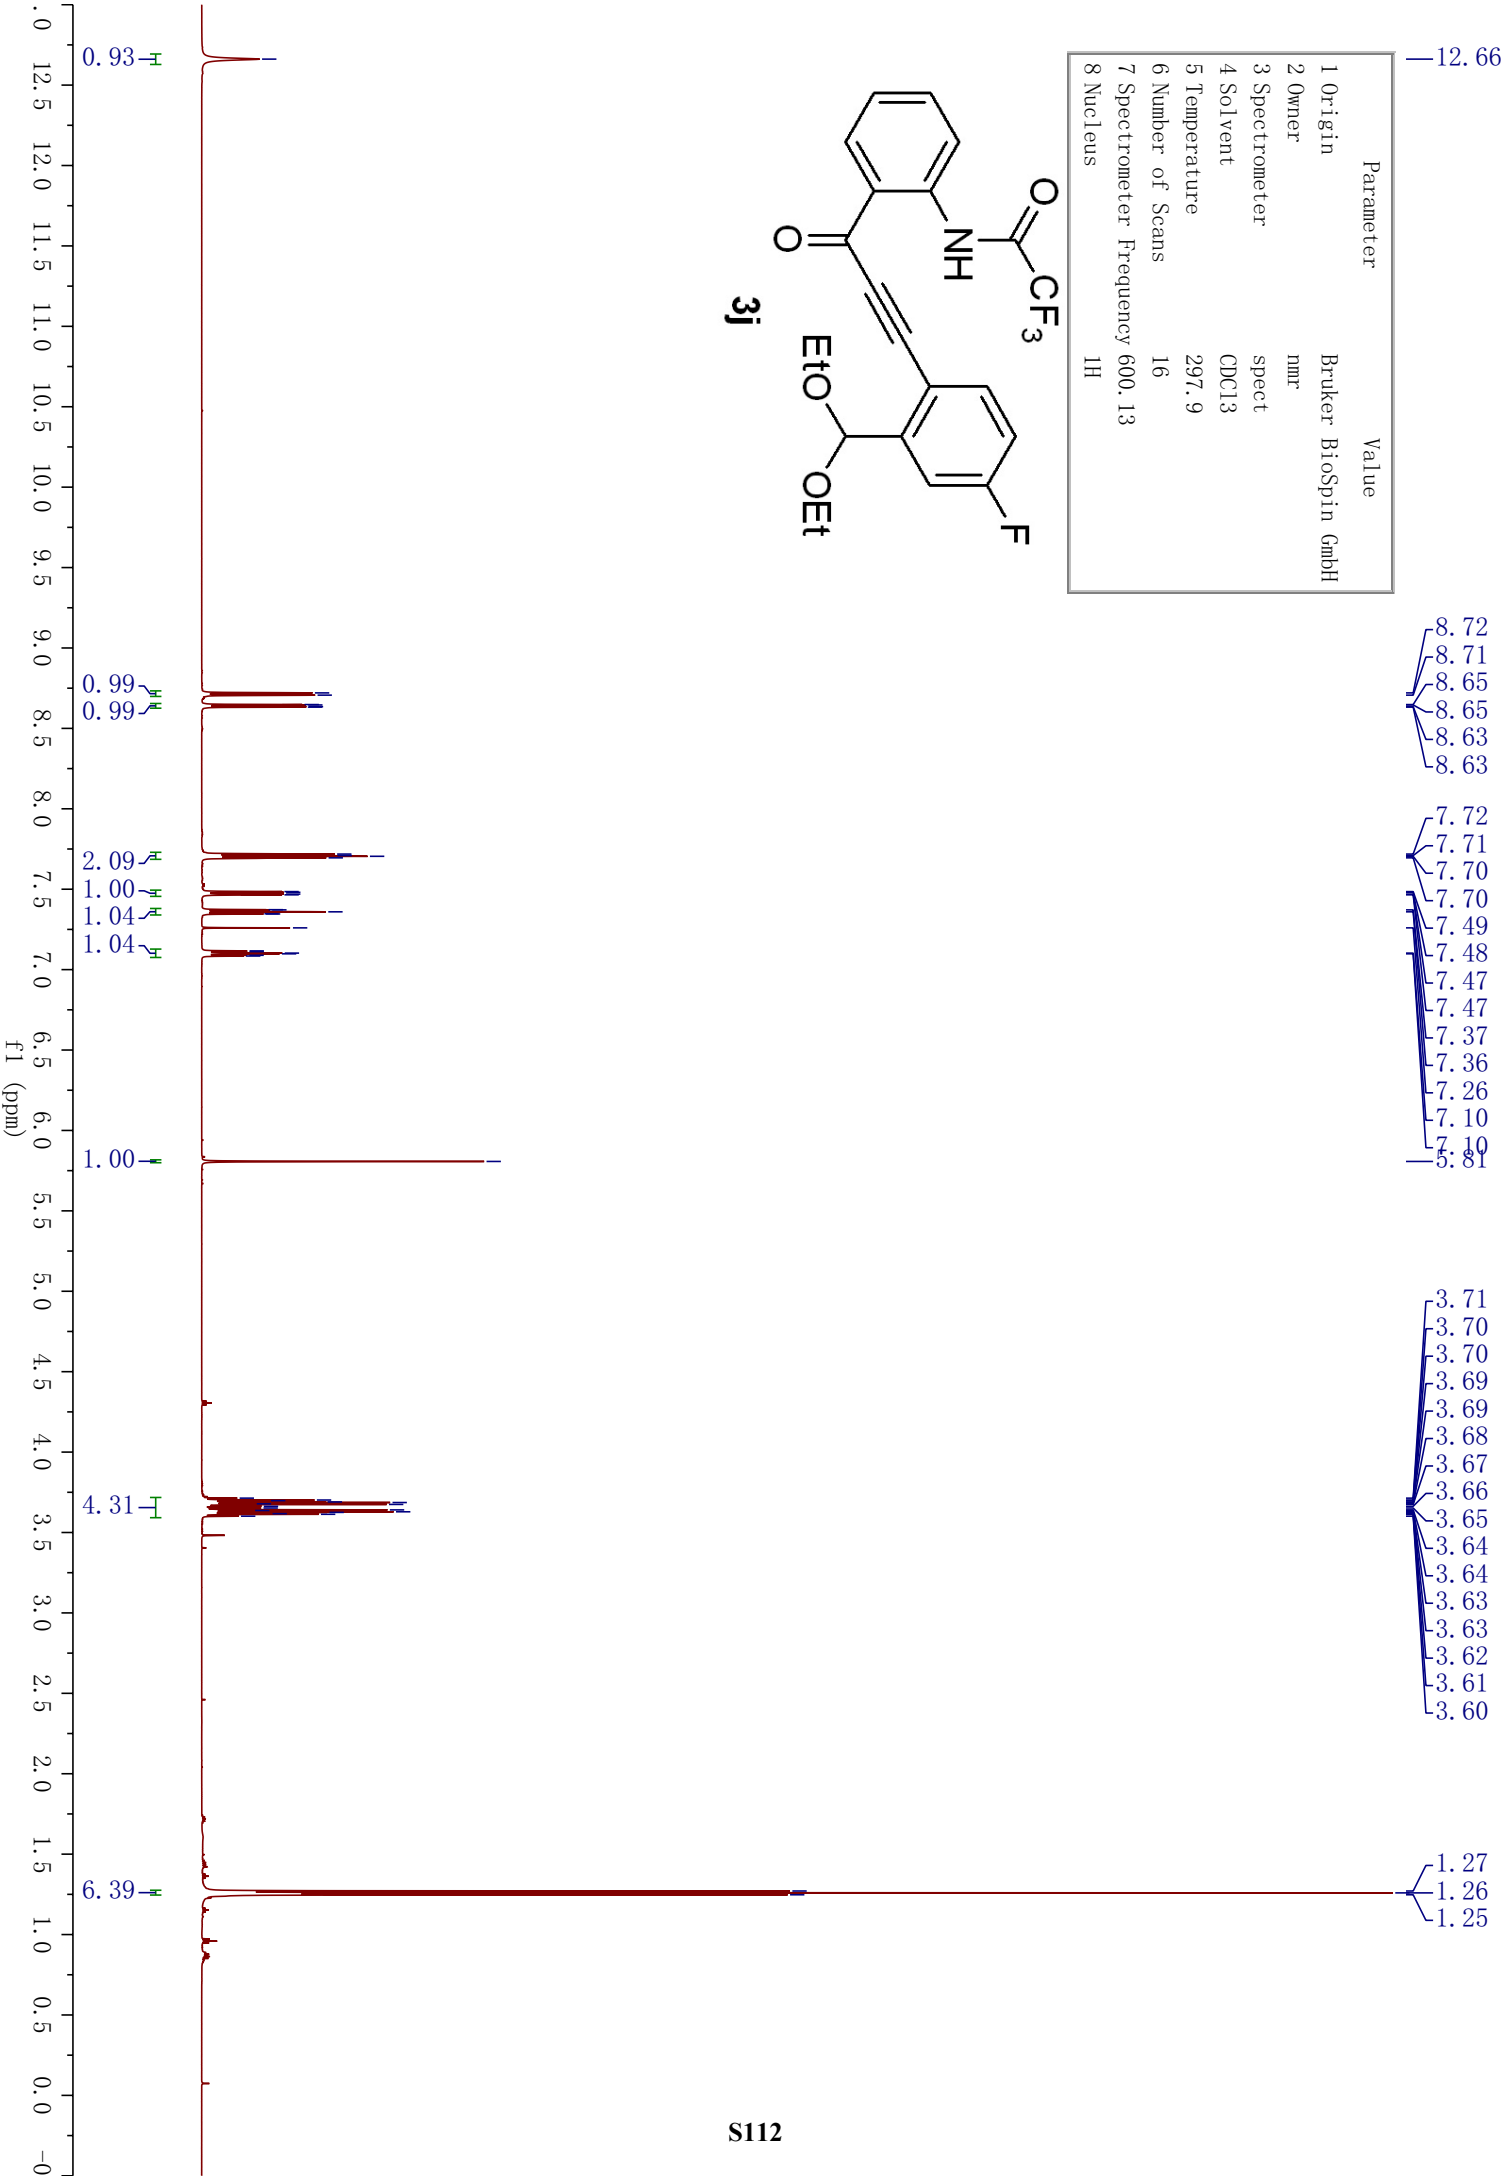

| Parameter                | Value                |
|--------------------------|----------------------|
| 1 Origin                 | Brucker BioSpin GmbH |
| 2 Owner                  | nmr                  |
| 3 Spectrometer           | spect                |
| 4 Solvent                | CDCl3                |
| 5 Temperature            | 297.9                |
| 6 Number of Scans        | 240                  |
| 7 Spectrometer Frequency | 150.90               |
| 8 Nucleus                | <sup>13</sup> C      |

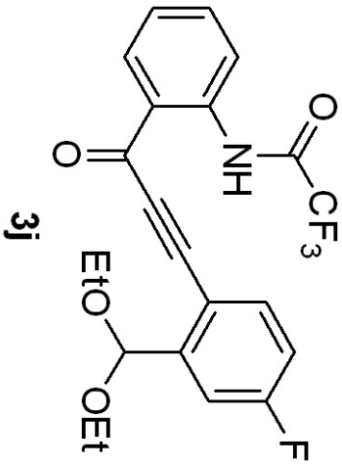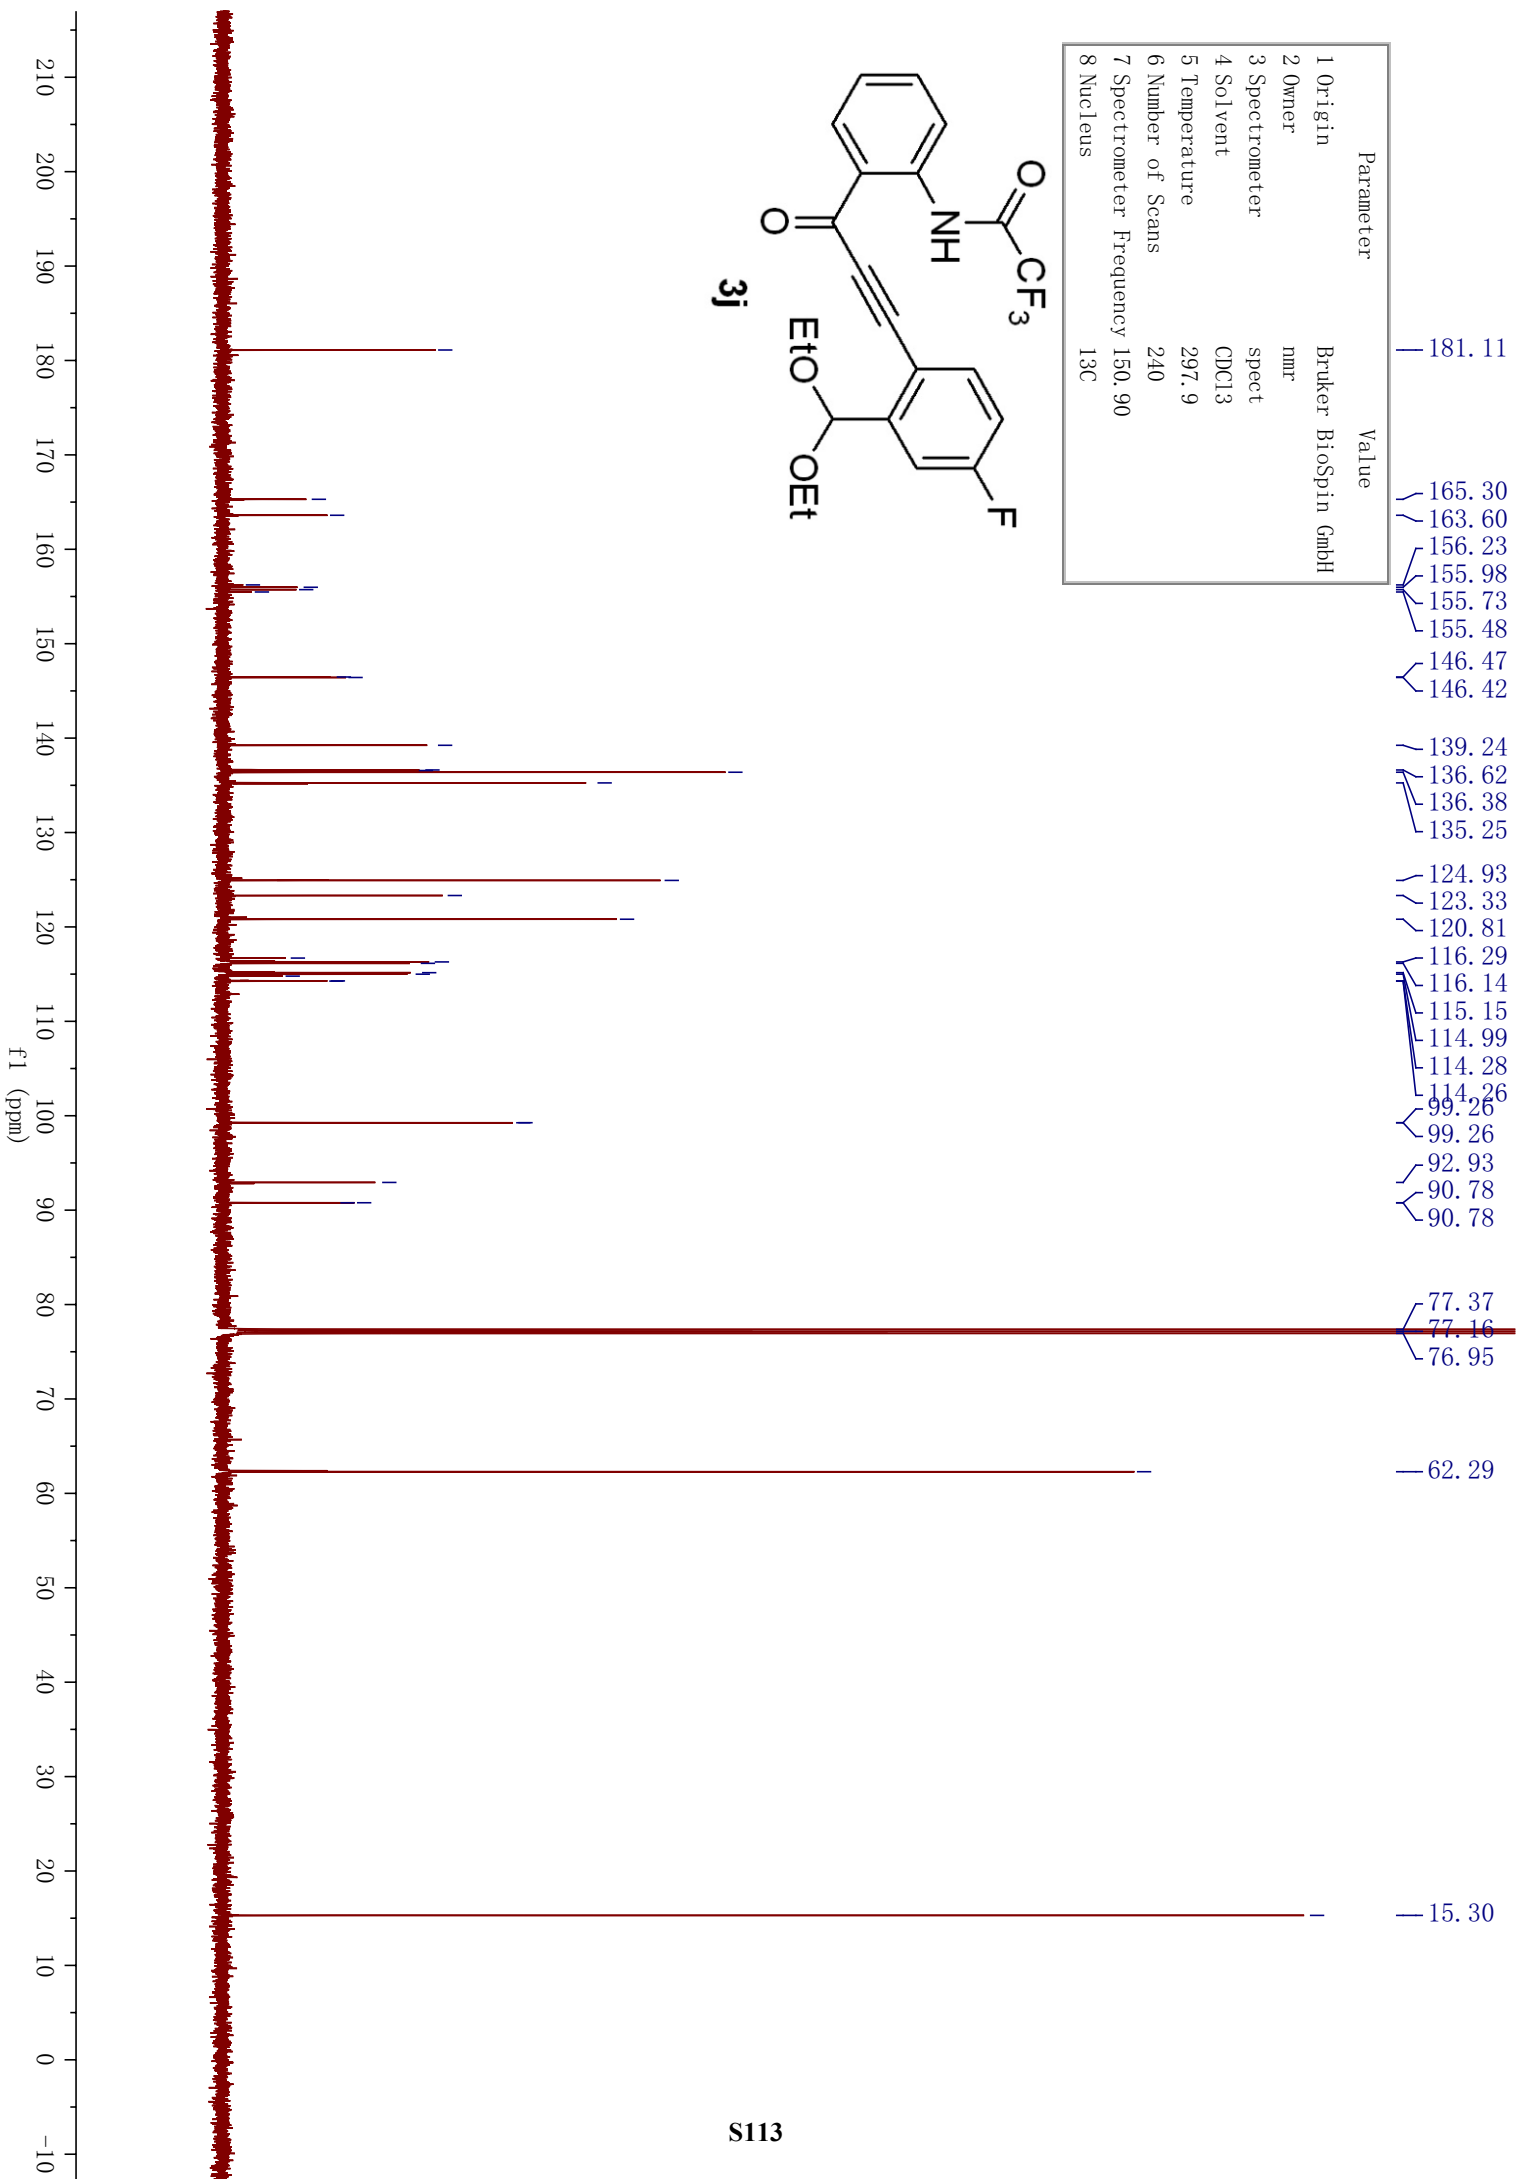

8.70  
8.69  
8.68  
7.76  
7.76  
7.67  
7.66  
7.65  
7.65  
7.40  
7.40  
7.39  
7.39  
7.26

5.82

3.70  
3.69  
3.69  
3.68  
3.67  
3.67  
3.66  
3.66  
3.66  
3.65  
3.65  
3.64  
3.64  
3.63  
3.63  
3.62  
3.61

1.27  
1.26  
1.24

| Parameter                | Value                |
|--------------------------|----------------------|
| 1 Origin                 | Brucker BioSpin GmbH |
| 2 Owner                  | nmr                  |
| 3 Spectrometer           | spect                |
| 4 Solvent                | CDCl3                |
| 5 Temperature            | 297.9                |
| 6 Number of Scans        | 16                   |
| 7 Spectrometer Frequency | 600.13               |
| 8 Nucleus                | 1H                   |

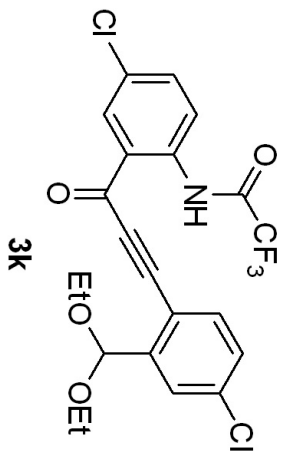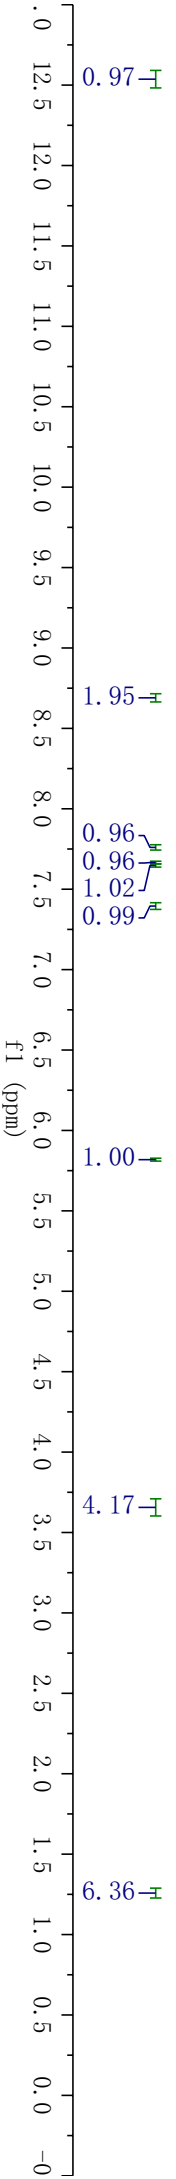

| Parameter                | Value               |
|--------------------------|---------------------|
| 1 Origin                 | Bruker Biospin GmbH |
| 2 Owner                  | nmr                 |
| 3 Spectrometer           | spect               |
| 4 Solvent                | CDCl3               |
| 5 Temperature            | 298.0               |
| 6 Number of Scans        | 197                 |
| 7 Spectrometer Frequency | 150.90              |
| 8 Nucleus                | <sup>13</sup> C     |

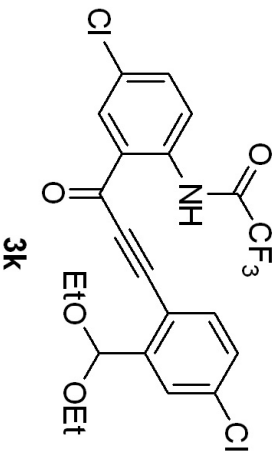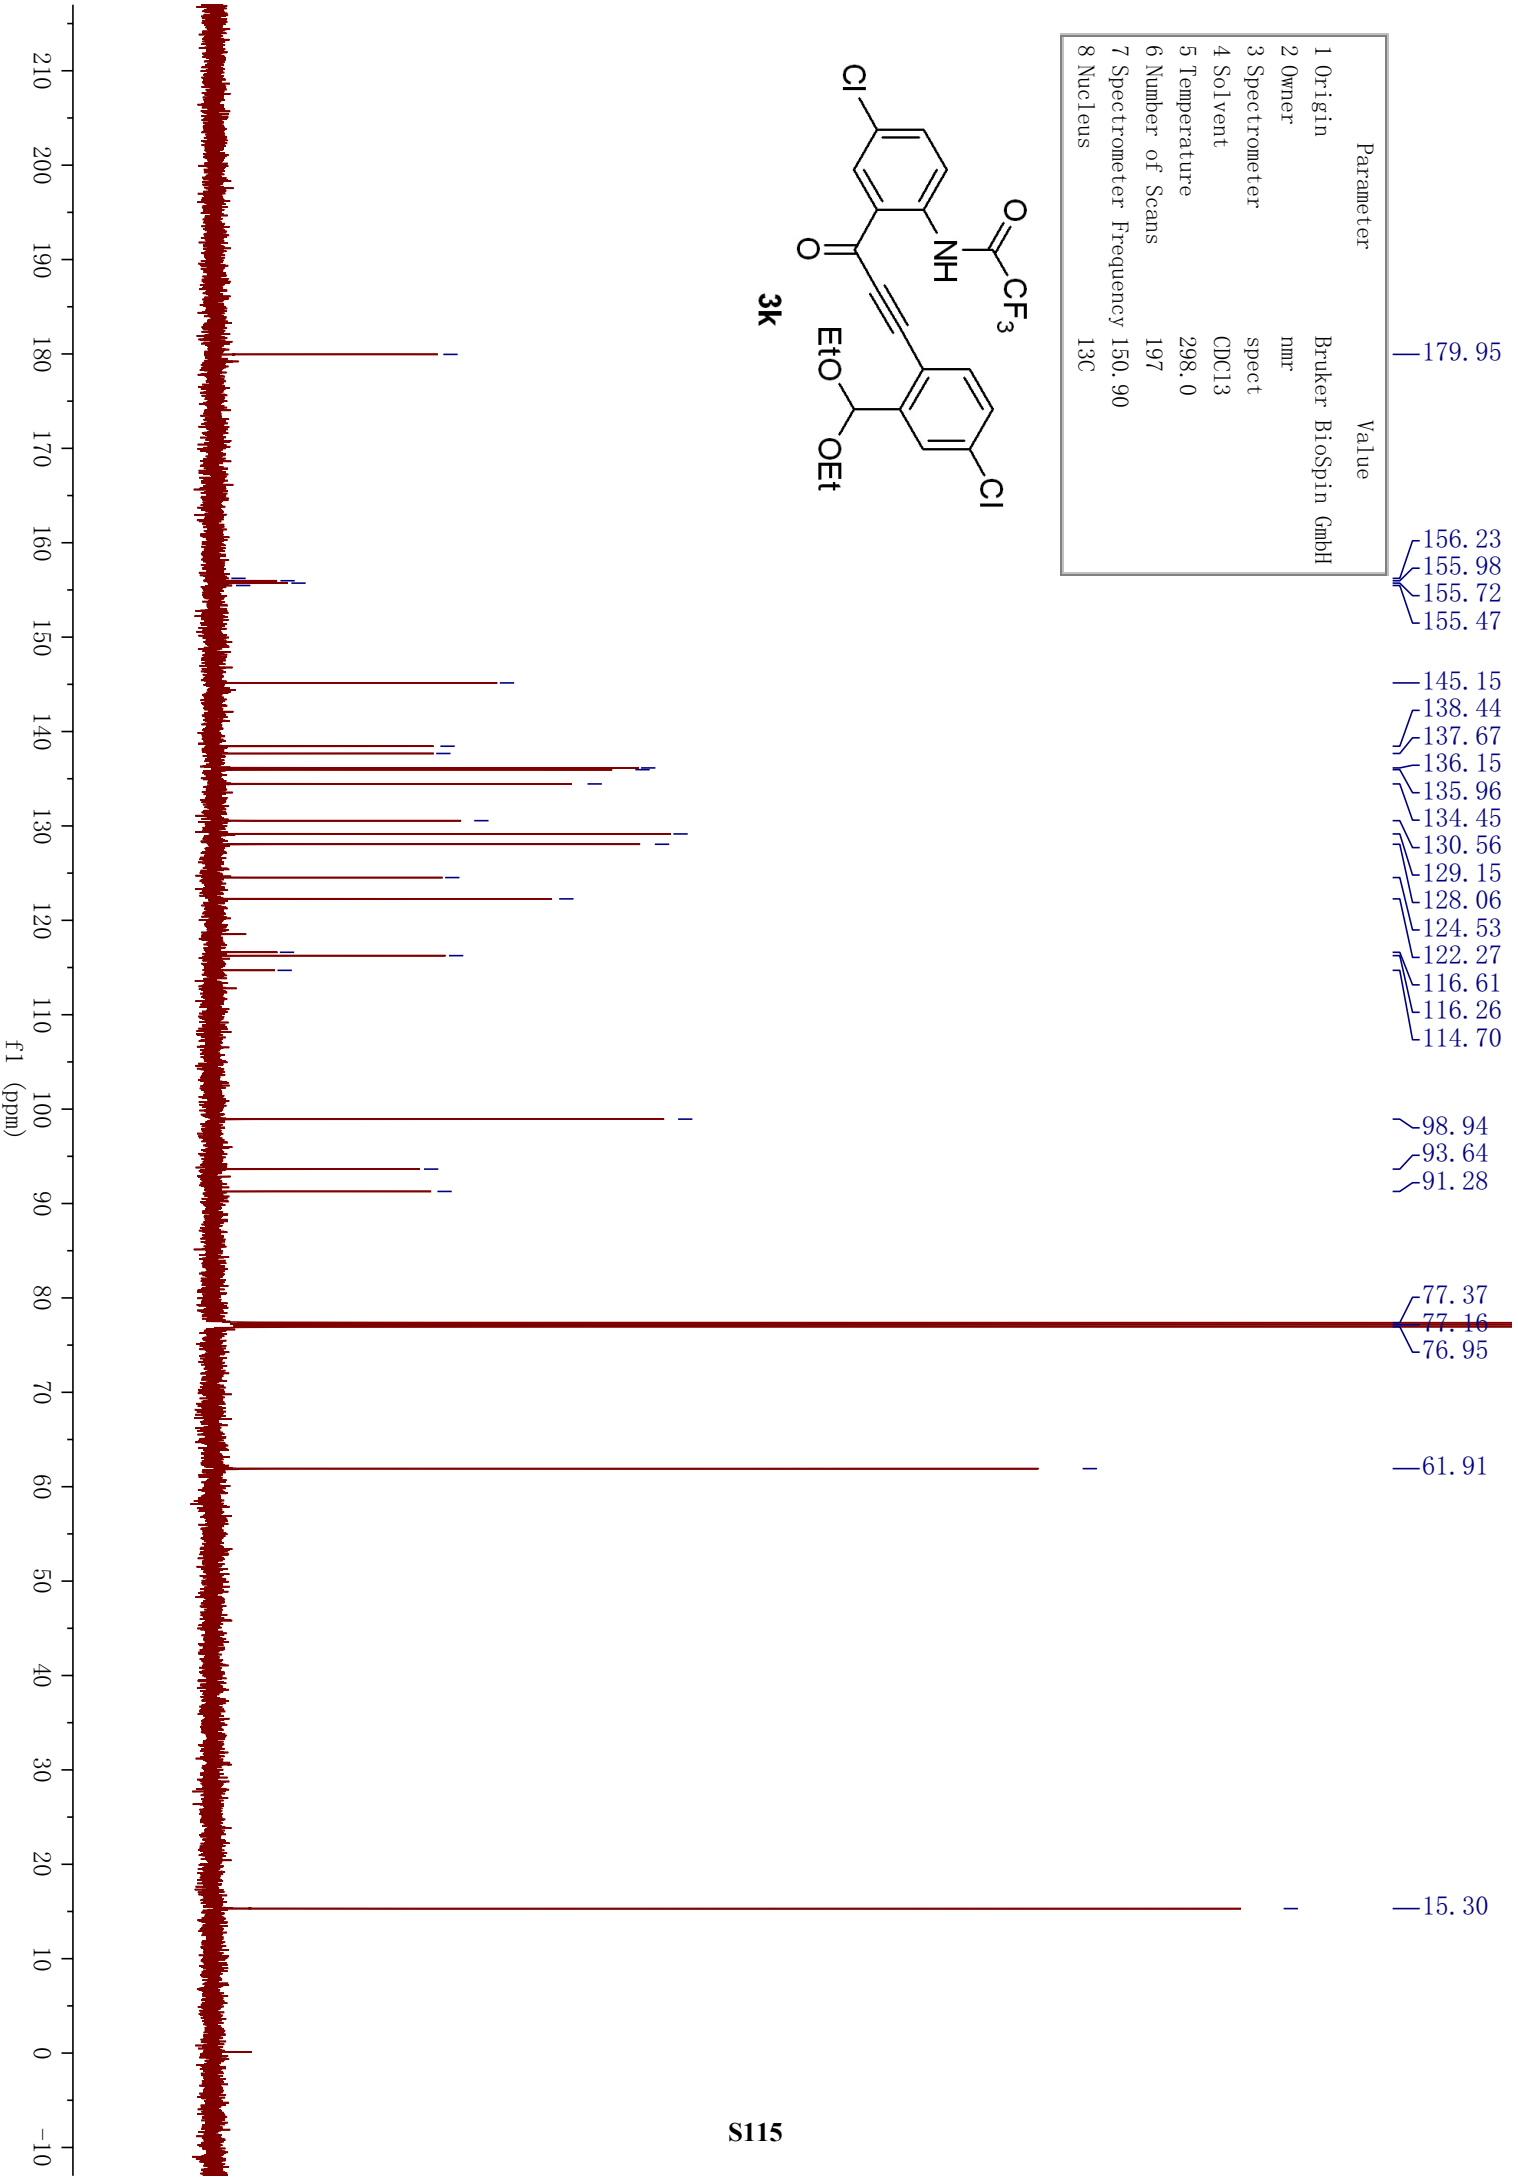



12.70

| Parameter                | Value                |
|--------------------------|----------------------|
| 1 Origin                 | Brucker Biospin GmbH |
| 2 Owner                  | nmr                  |
| 3 Spectrometer           | spect                |
| 4 Solvent                | CDCl3                |
| 5 Temperature            | 297.9                |
| 6 Number of Scans        | 16                   |
| 7 Spectrometer Frequency | 600.13               |
| 8 Nucleus                | <sup>1</sup> H       |

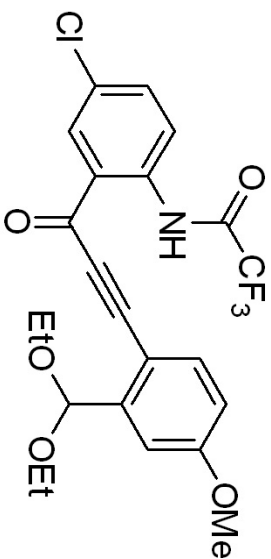

31

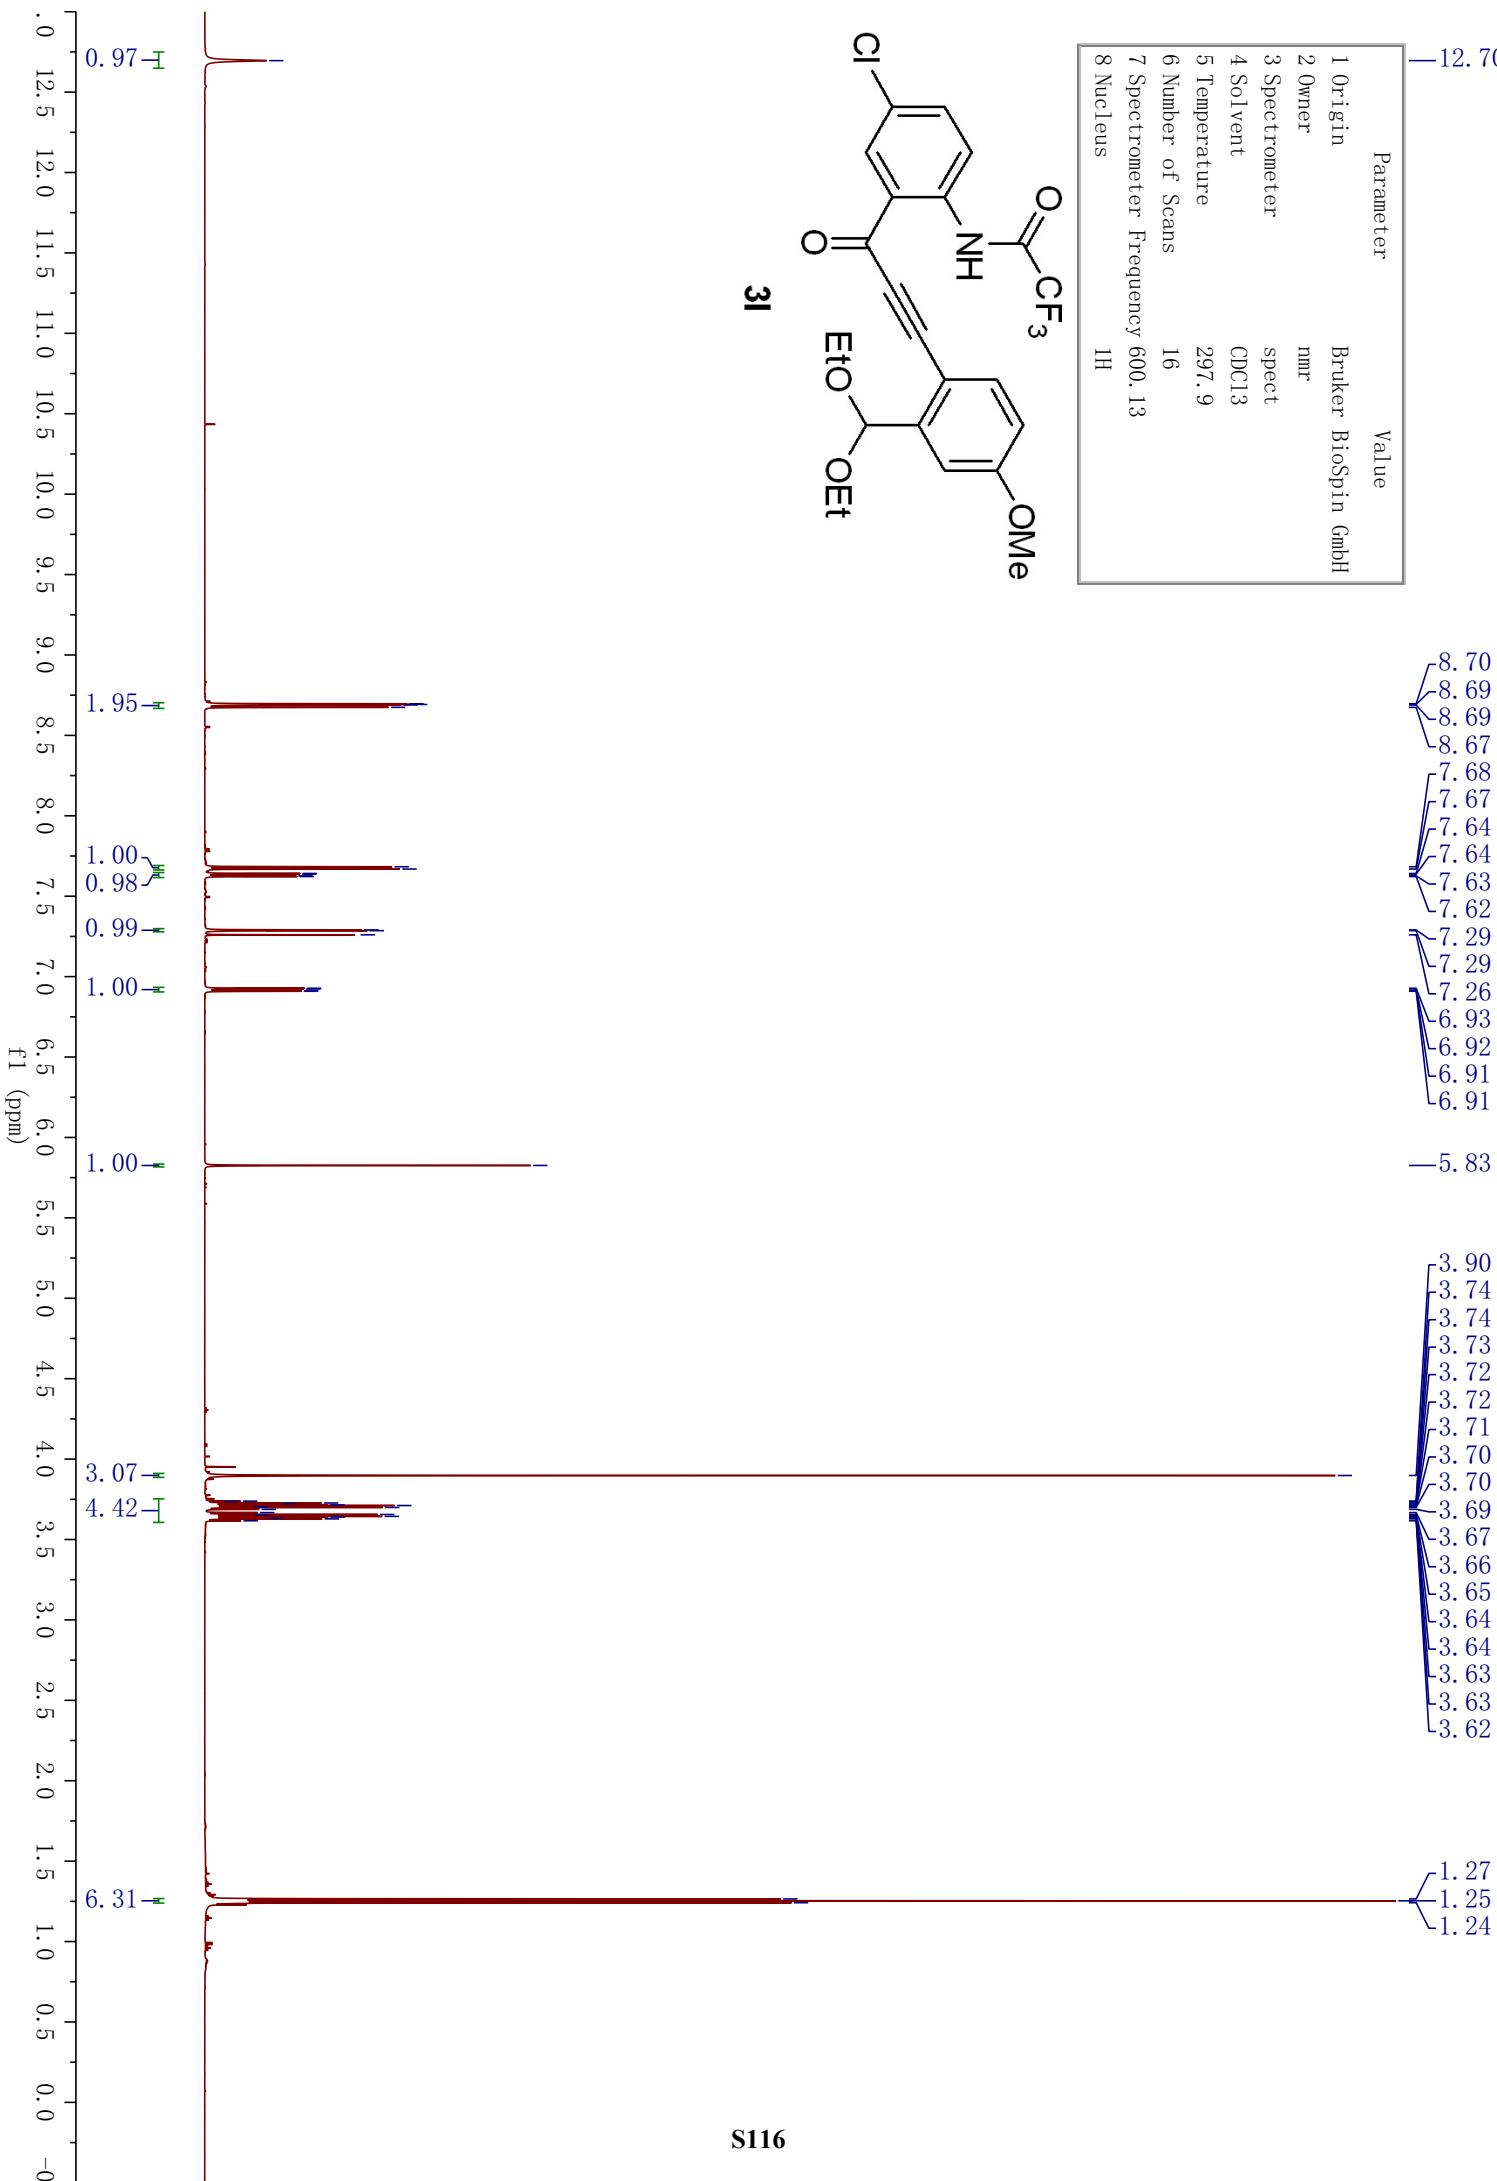

| Parameter                | Value               |
|--------------------------|---------------------|
| 1 Origin                 | Bruker Biospin GmbH |
| 2 Owner                  | nmr                 |
| 3 Spectrometer           | spect               |
| 4 Solvent                | CDCl3               |
| 5 Temperature            | 297.9               |
| 6 Number of Scans        | 977                 |
| 7 Spectrometer Frequency | 150.90              |
| 8 Nucleus                | <sup>13</sup> C     |

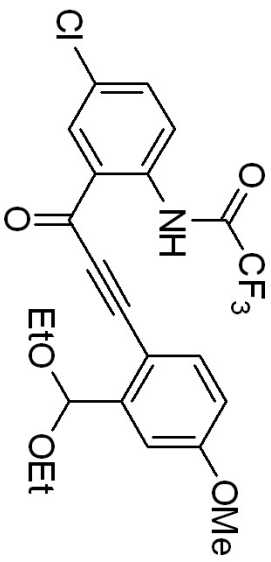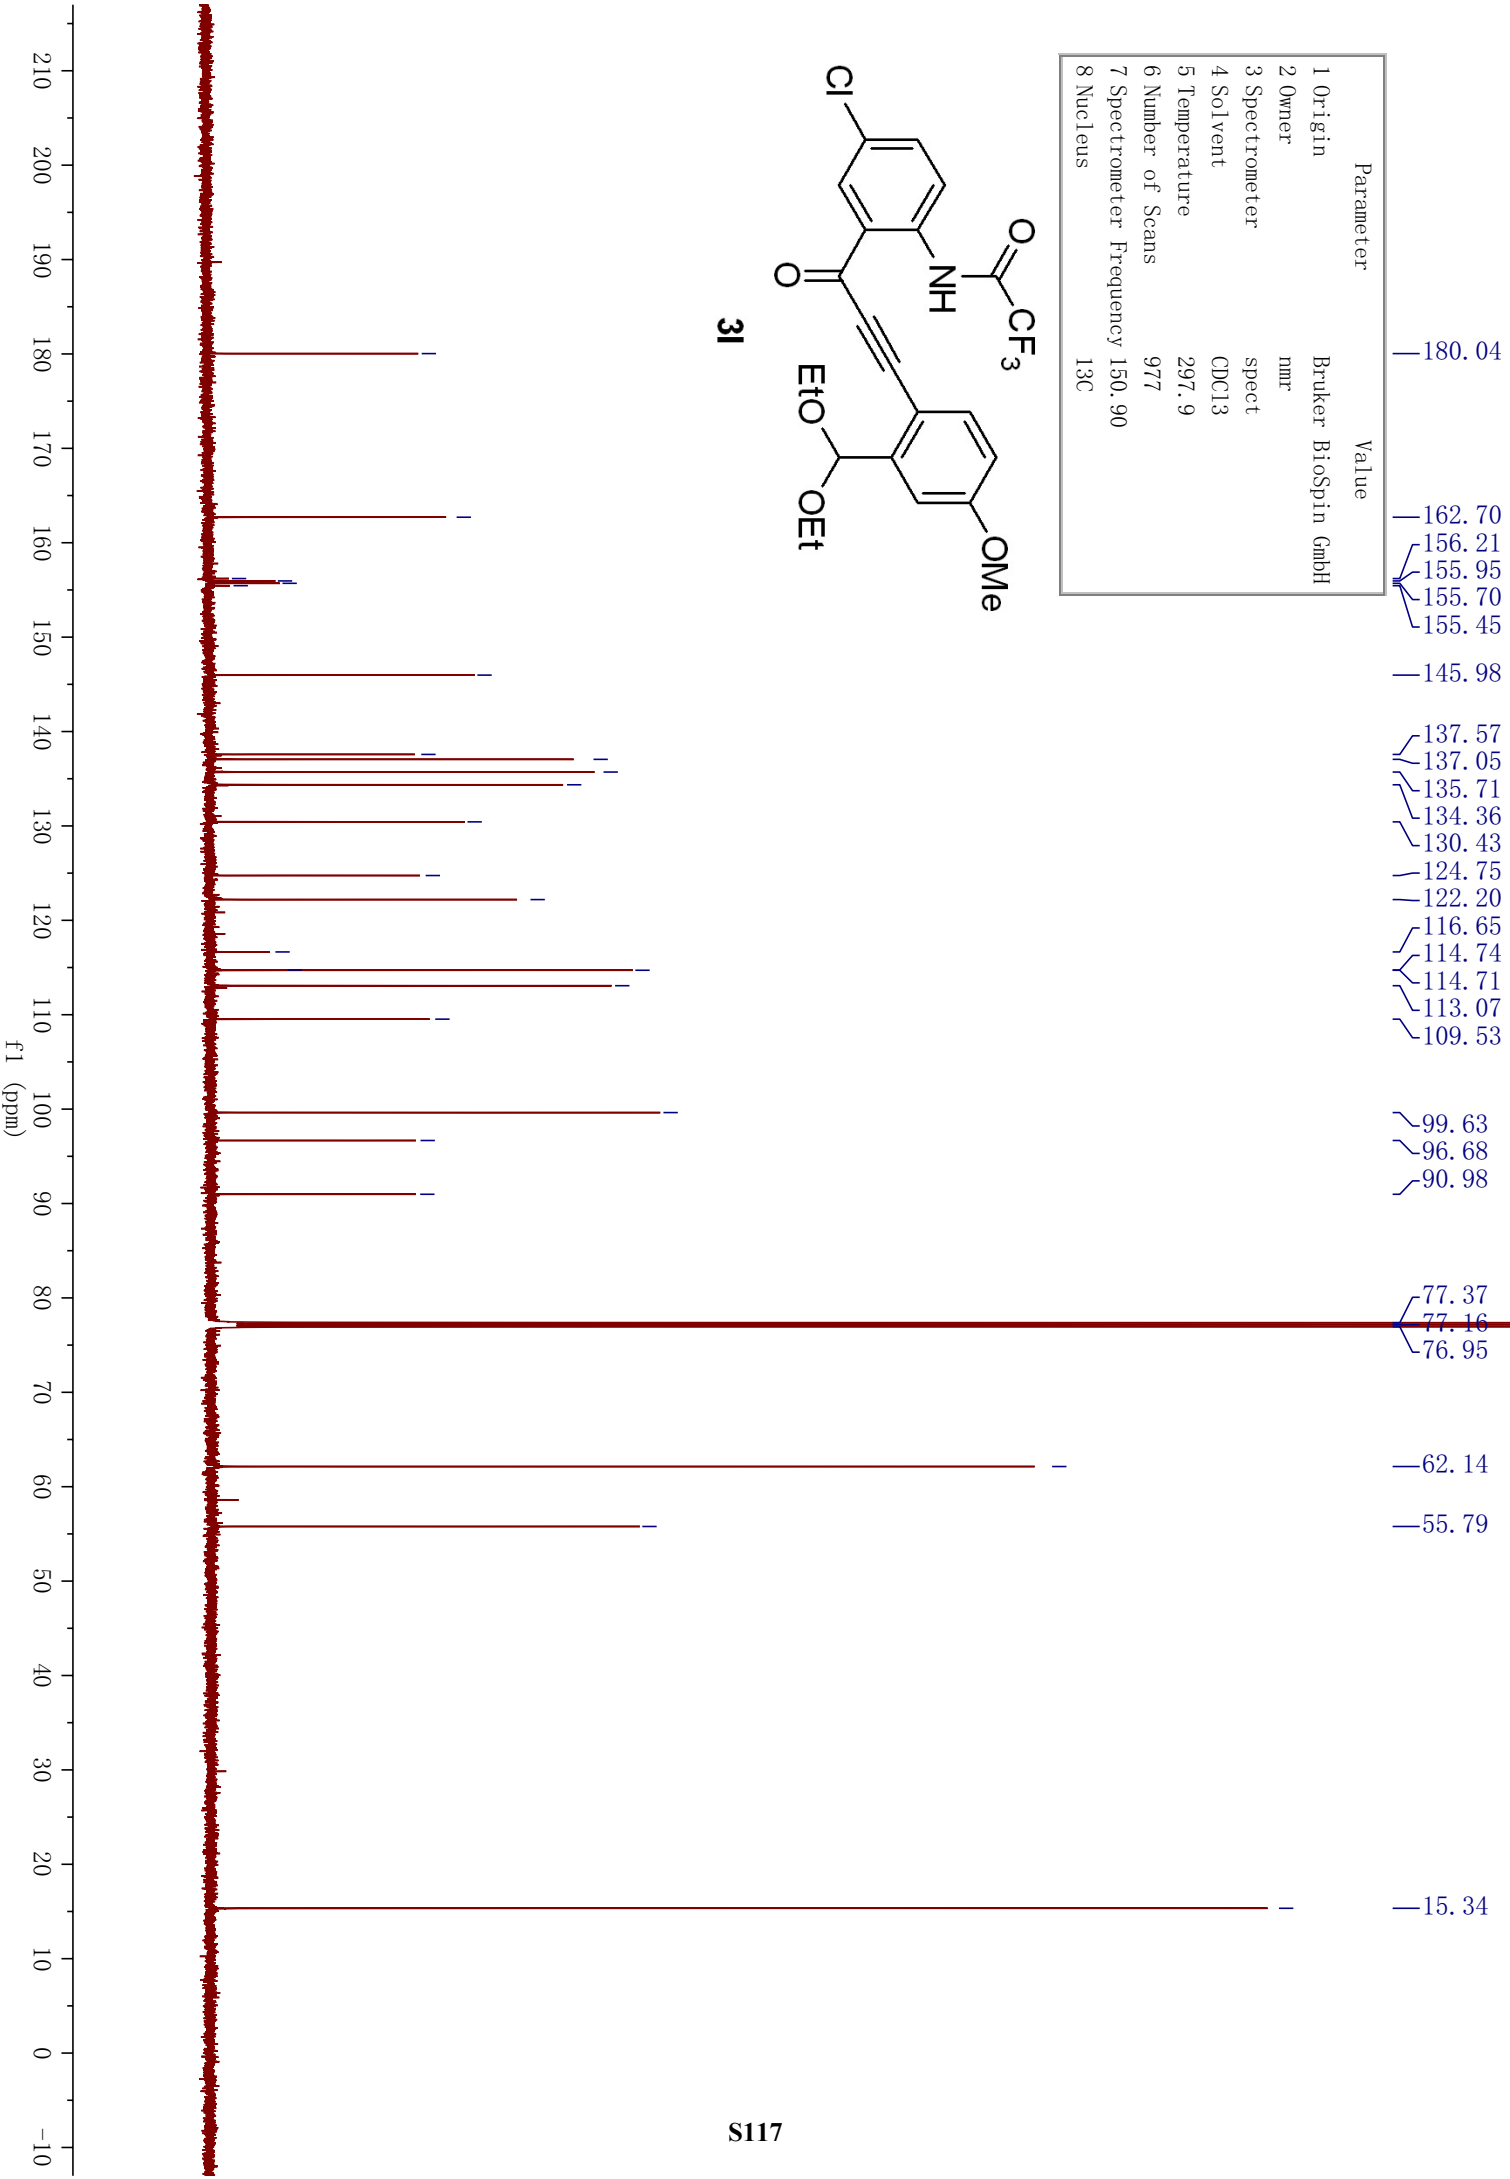



| Parameter                | Value               |
|--------------------------|---------------------|
| 1 Origin                 | Brüker BioSpin GmbH |
| 2 Owner                  | nmr                 |
| 3 Spectrometer           | spect               |
| 4 Solvent                | CDCl <sub>3</sub>   |
| 5 Temperature            | 297.9               |
| 6 Number of Scans        | 202                 |
| 7 Spectrometer Frequency | 150.90              |
| 8 Nucleus                | <sup>13</sup> C     |

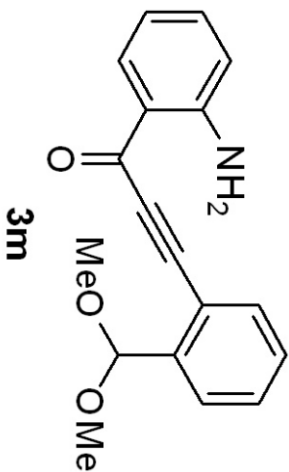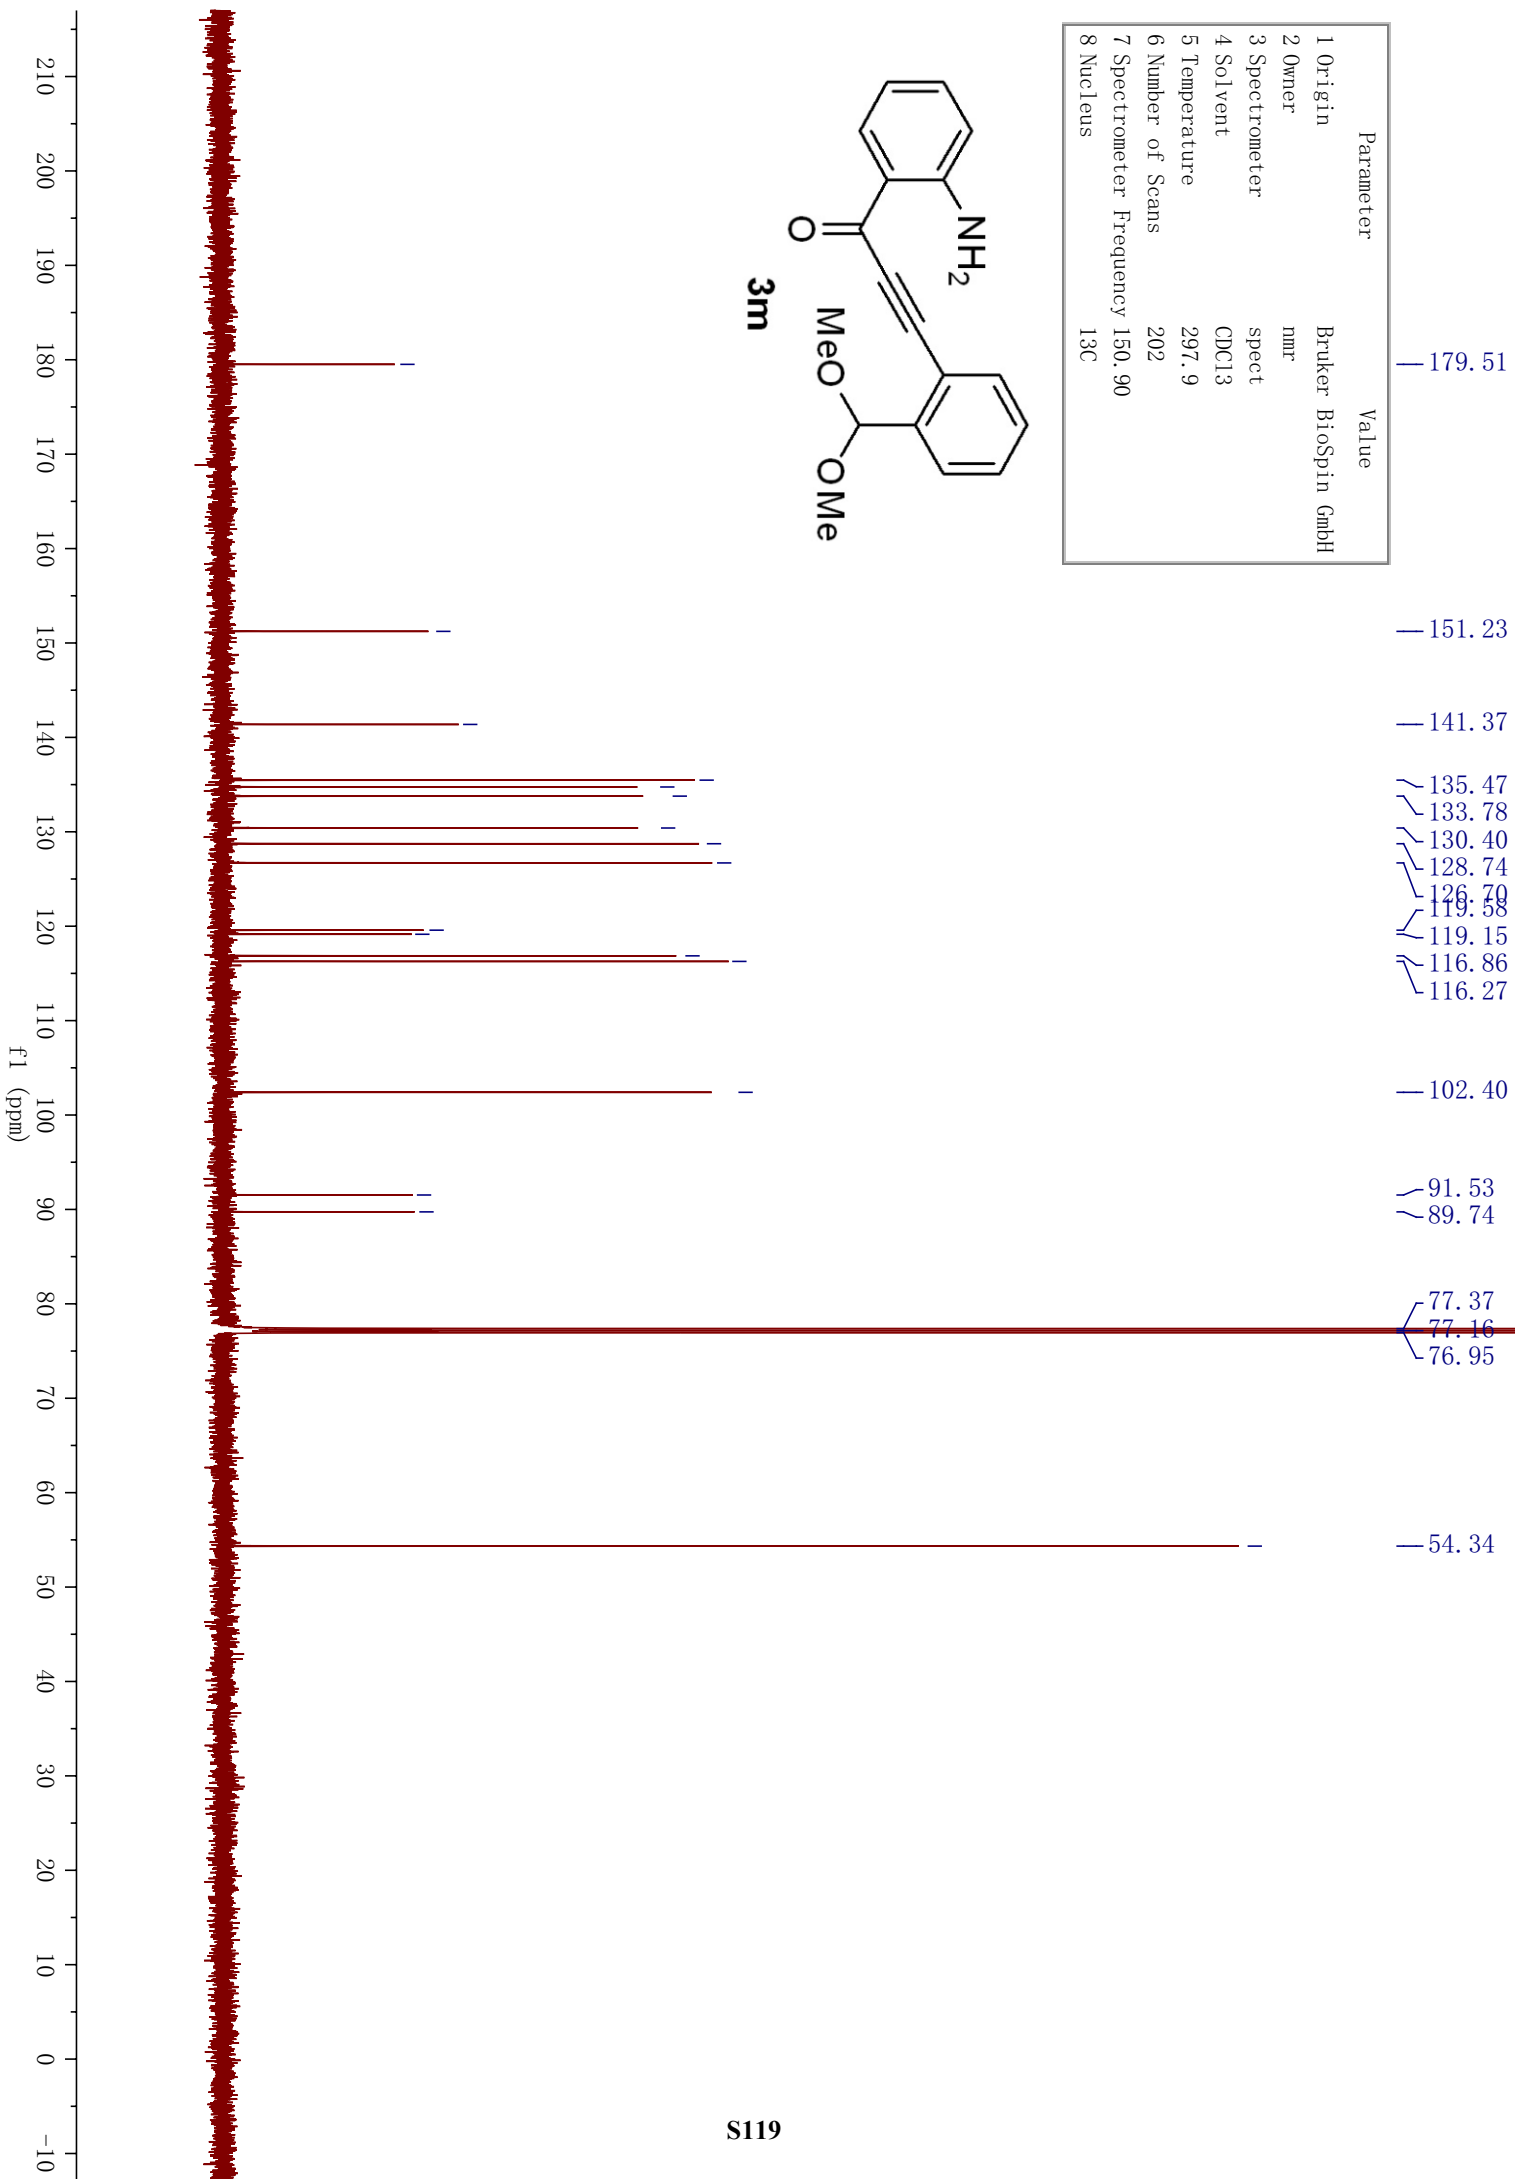

| Parameter                | Value               |
|--------------------------|---------------------|
| 1 Origin                 | Brüker Biospin GmbH |
| 2 Owner                  | nmr                 |
| 3 Spectrometer           | spect               |
| 4 Solvent                | CDCl3               |
| 5 Temperature            | 297.9               |
| 6 Number of Scans        | 16                  |
| 7 Spectrometer Frequency | 600.13              |
| 8 Nucleus                | <sup>1</sup> H      |

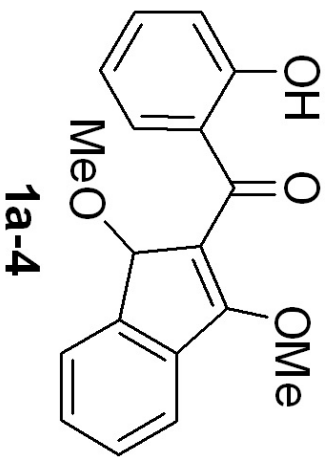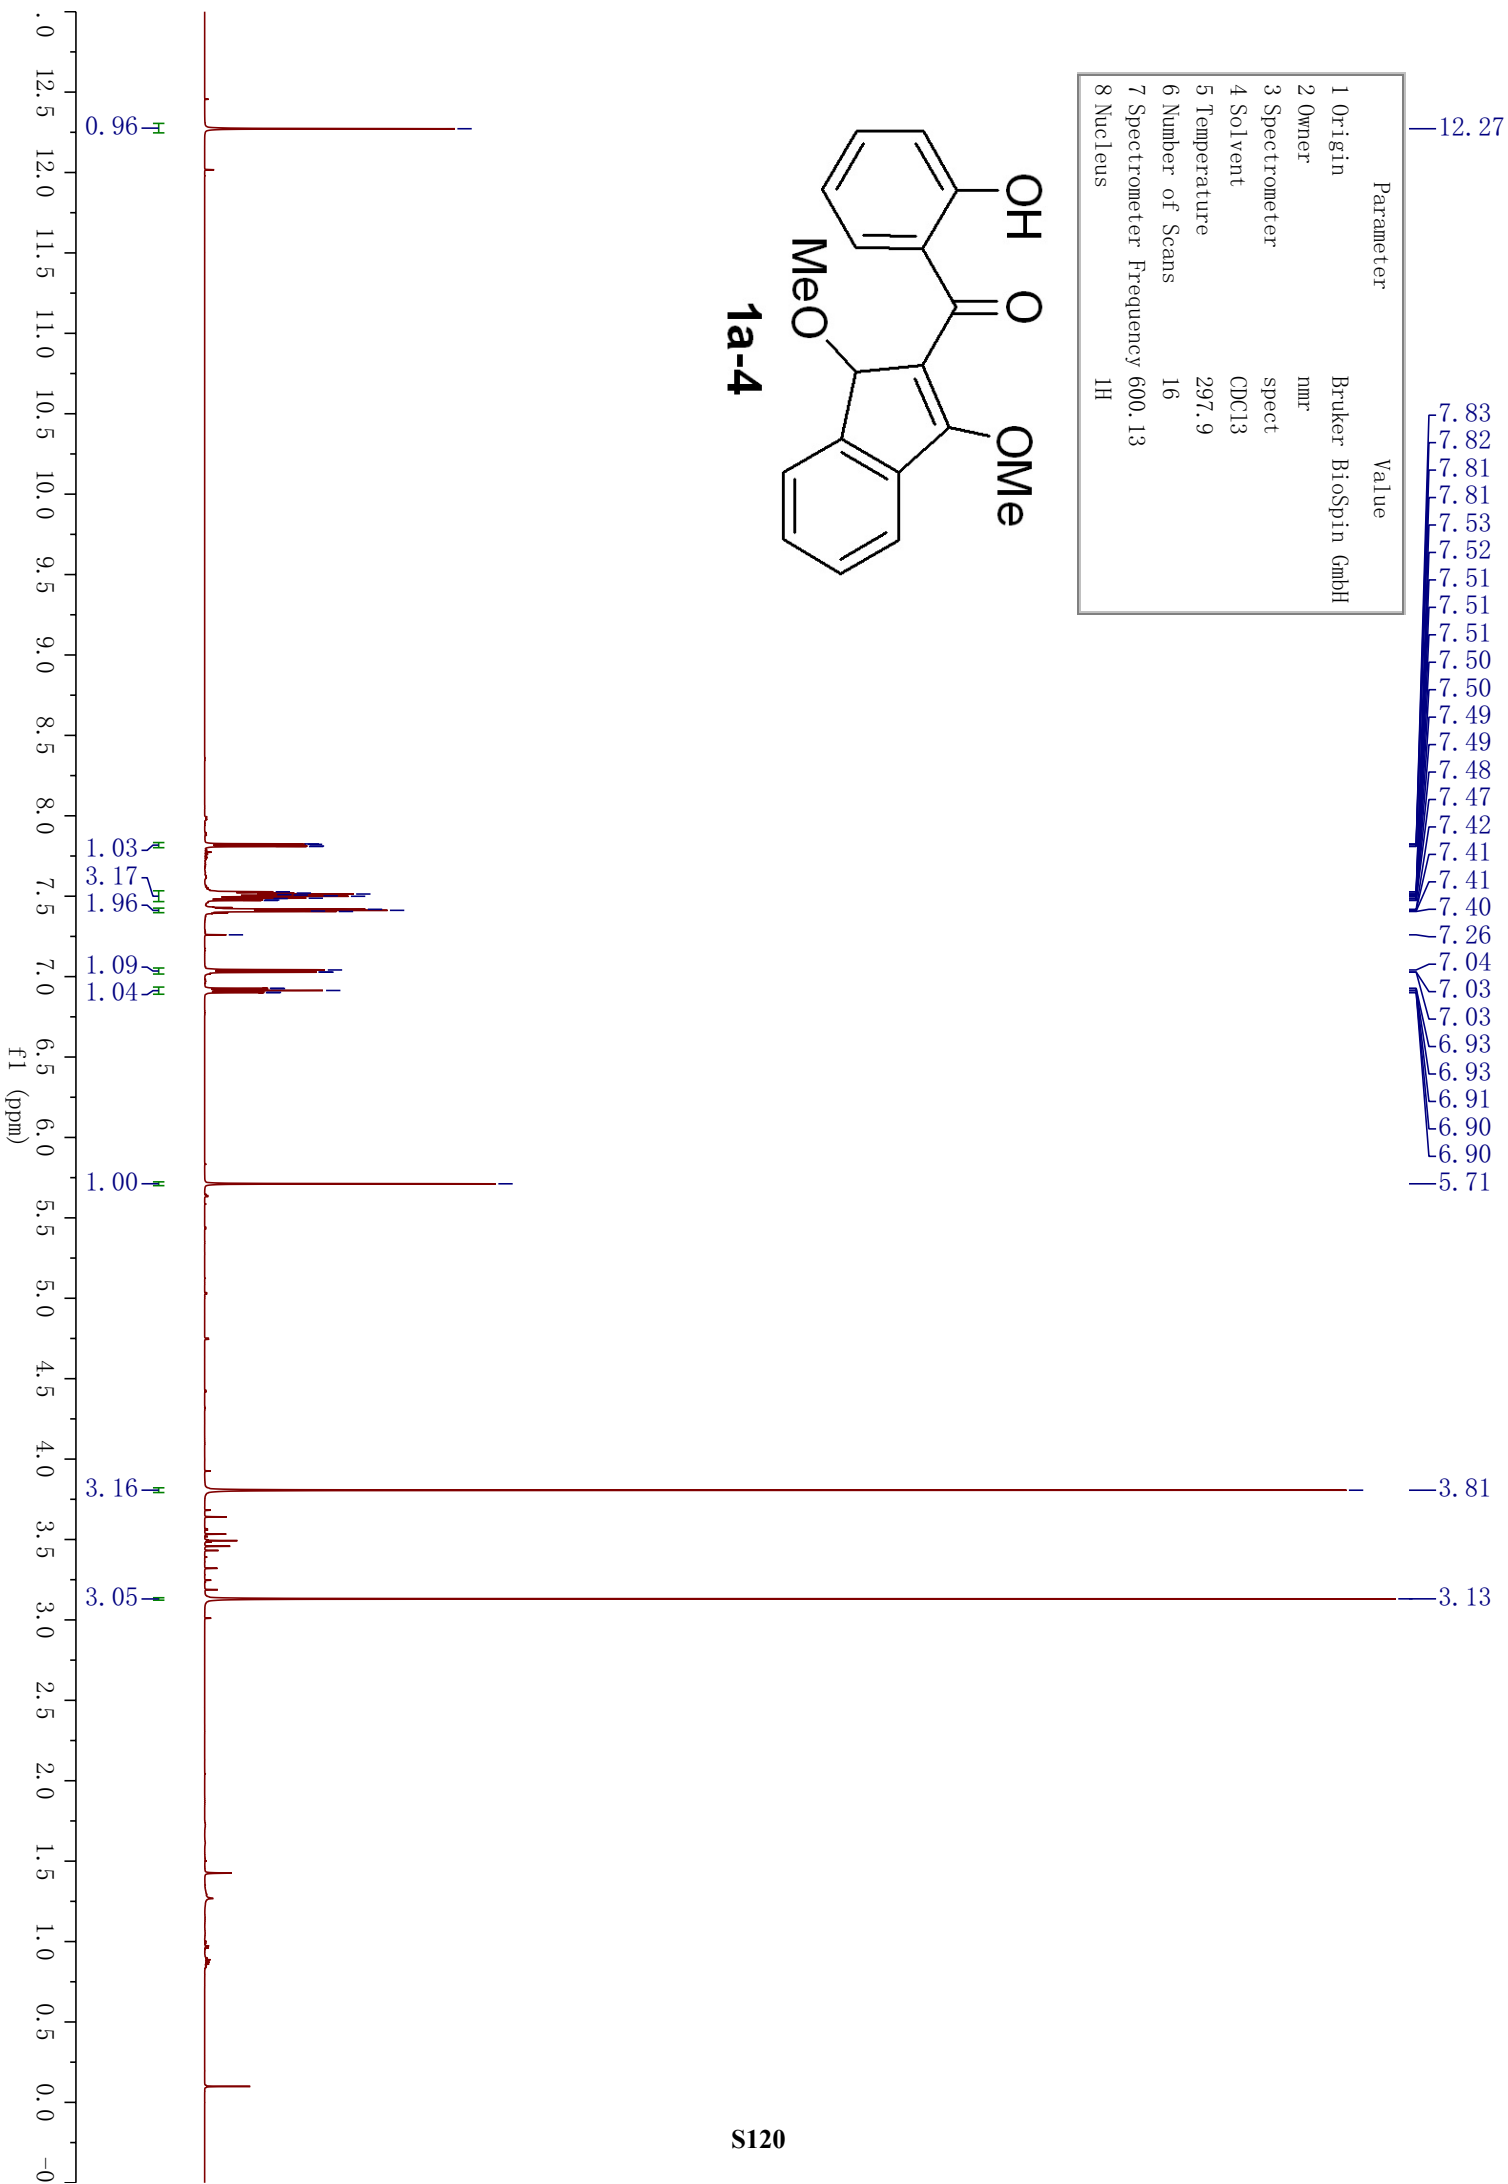

| Parameter                | Value               |
|--------------------------|---------------------|
| 1 Origin                 | Brüker Biospin GmbH |
| 2 Owner                  | nmr                 |
| 3 Spectrometer           | spect               |
| 4 Solvent                | DMSO                |
| 5 Temperature            | 297.9               |
| 6 Number of Scans        | 1021                |
| 7 Spectrometer Frequency | 150.90              |
| 8 Nucleus                | <sup>13</sup> C     |

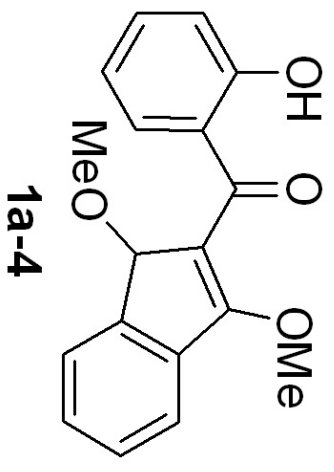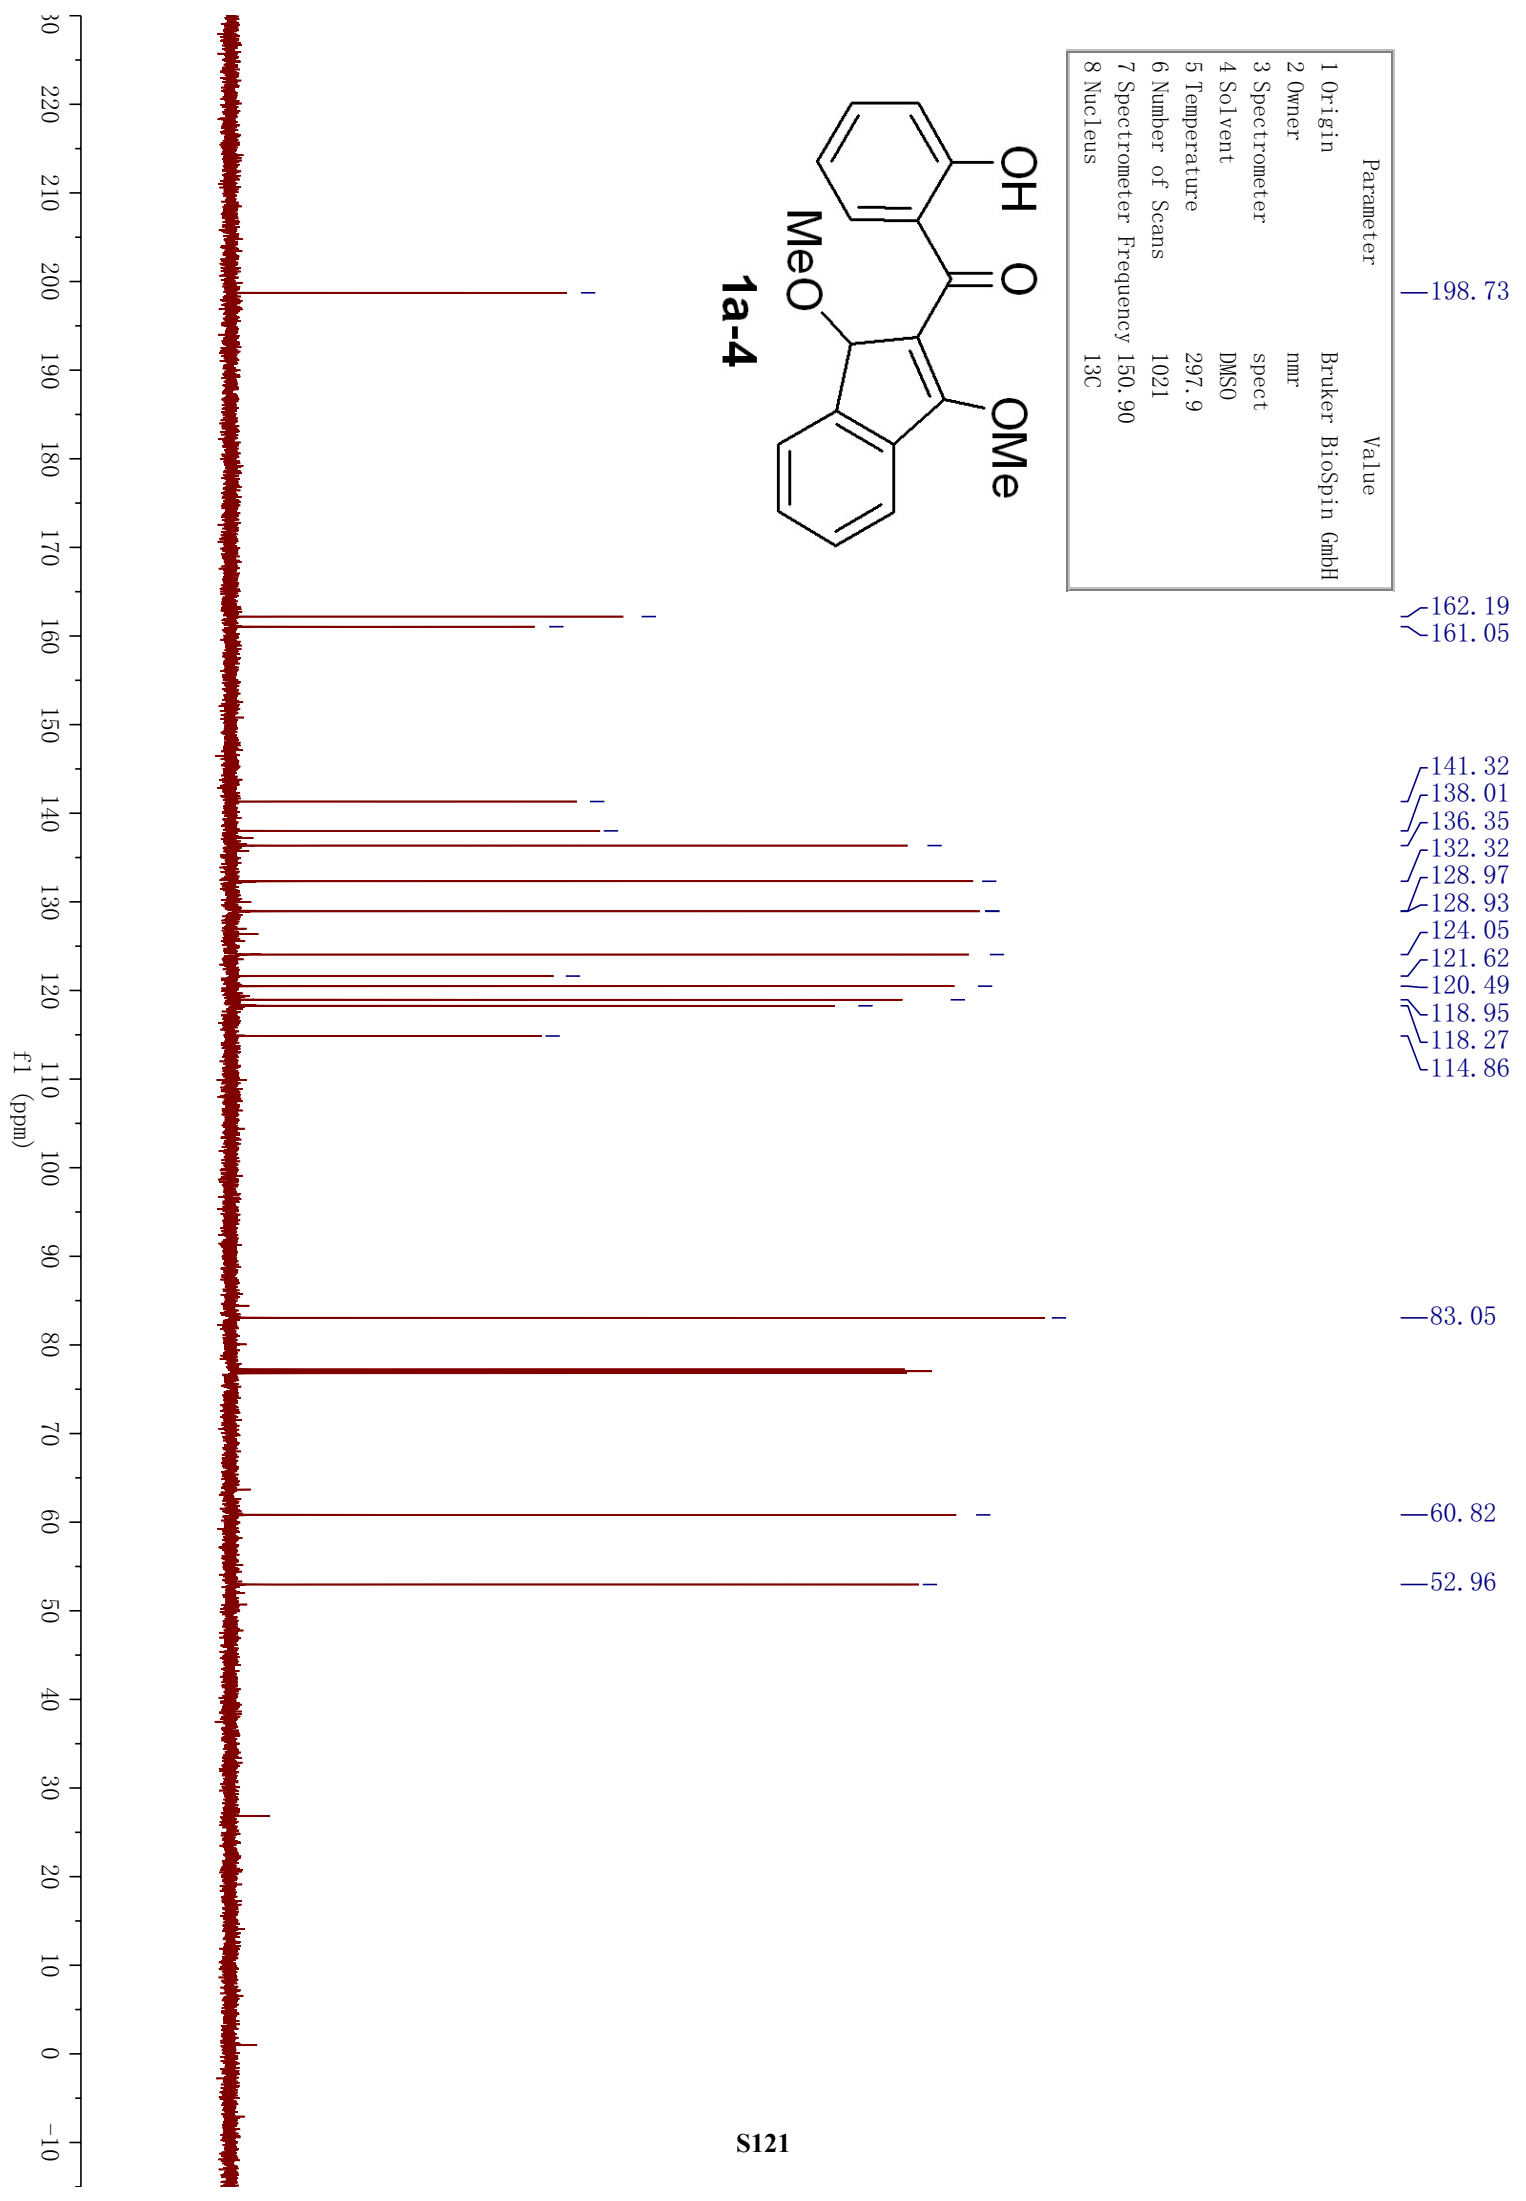

12.42

8.66  
8.65  
7.99  
7.99  
7.98  
7.98  
7.64  
7.54  
7.53  
7.53  
7.52  
7.44  
7.44  
7.44  
7.43  
7.43  
7.29  
7.26  
5.66

| Parameter                | Value               |
|--------------------------|---------------------|
| 1 Origin                 | Bruker Biospin GmbH |
| 2 Owner                  | nmr                 |
| 3 Spectrometer           | spect               |
| 4 Solvent                | CDCl3               |
| 5 Temperature            | 297.9               |
| 6 Number of Scans        | 16                  |
| 7 Spectrometer Frequency | 600.13              |
| 8 Nucleus                | <sup>1</sup> H      |

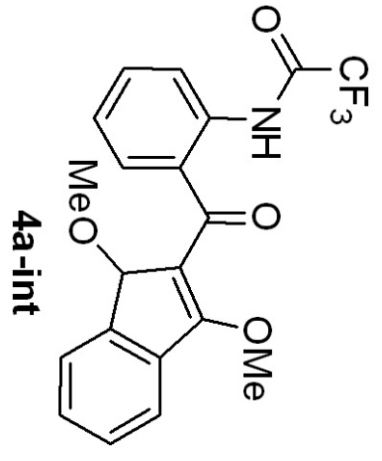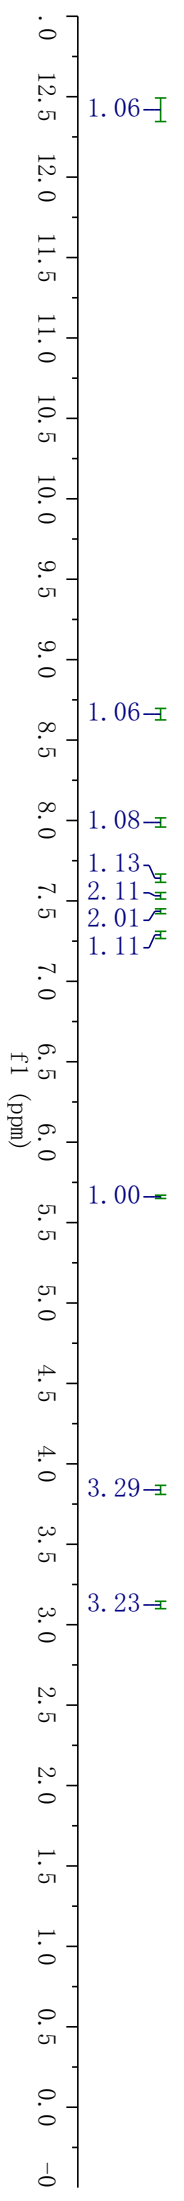

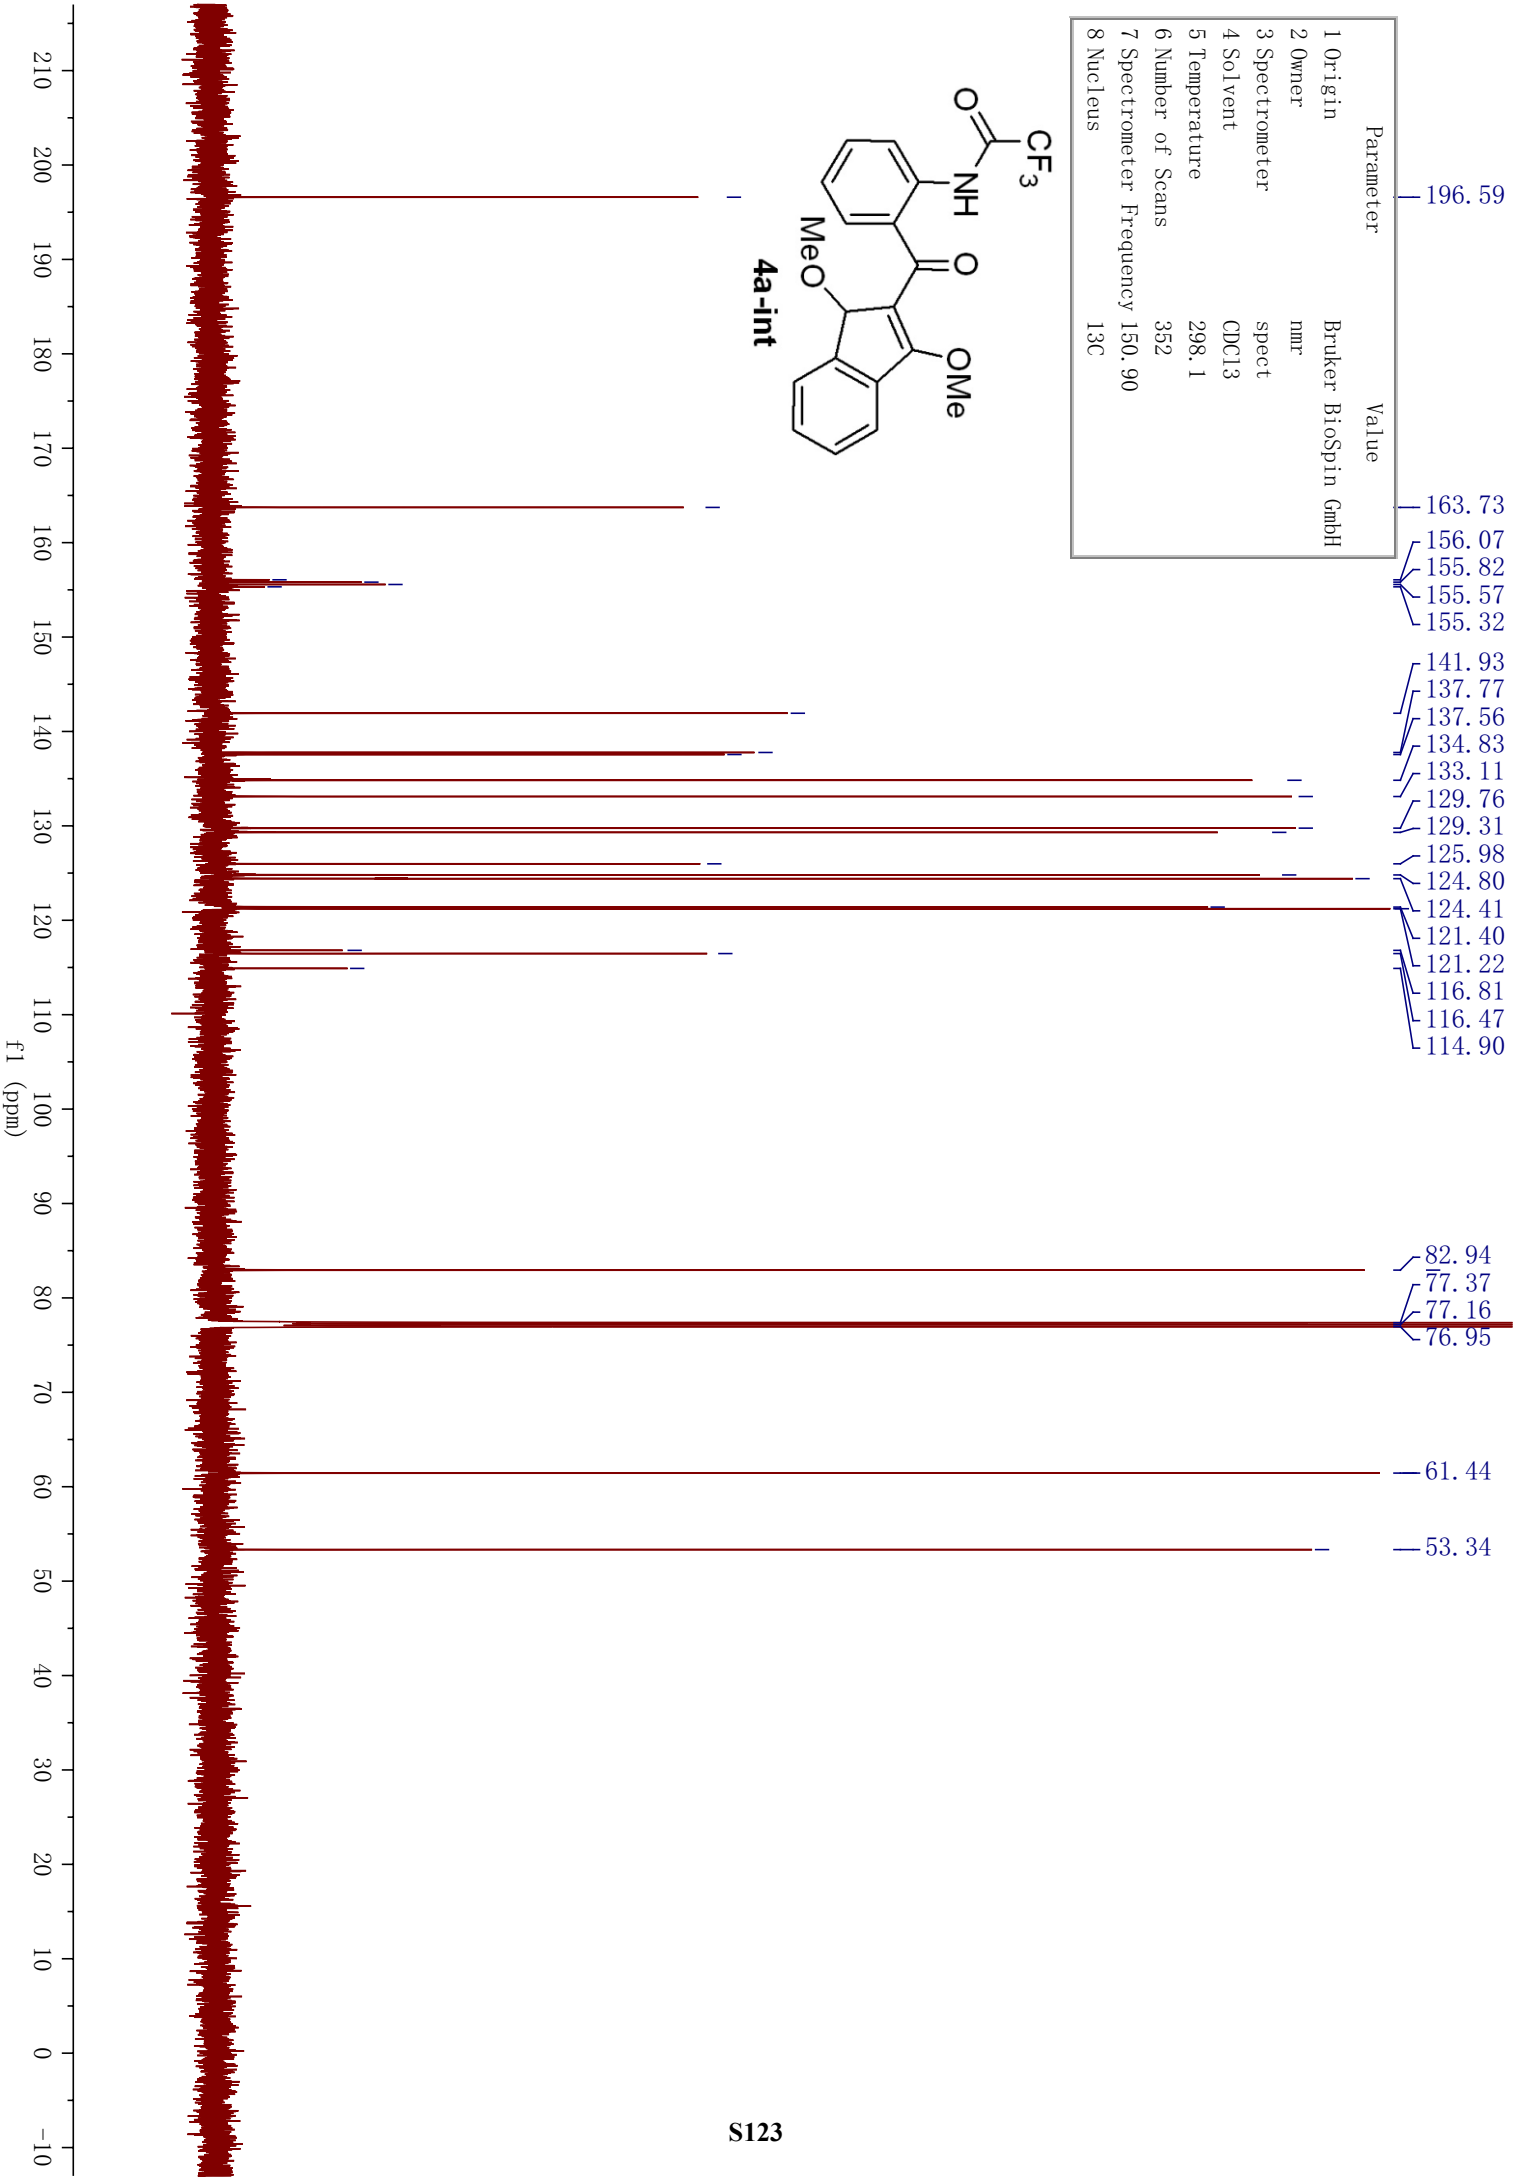



| Parameter                | Value               |
|--------------------------|---------------------|
| 1 Origin                 | Bruker Biospin GmbH |
| 2 Owner                  | nmr                 |
| 3 Spectrometer           | spect               |
| 4 Solvent                | DMSO                |
| 5 Temperature            | 297.9               |
| 6 Number of Scans        | 16                  |
| 7 Spectrometer Frequency | 600.13              |
| 8 Nucleus                | <sup>1</sup> H      |

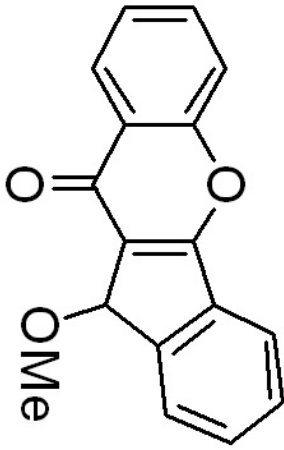

**2a**

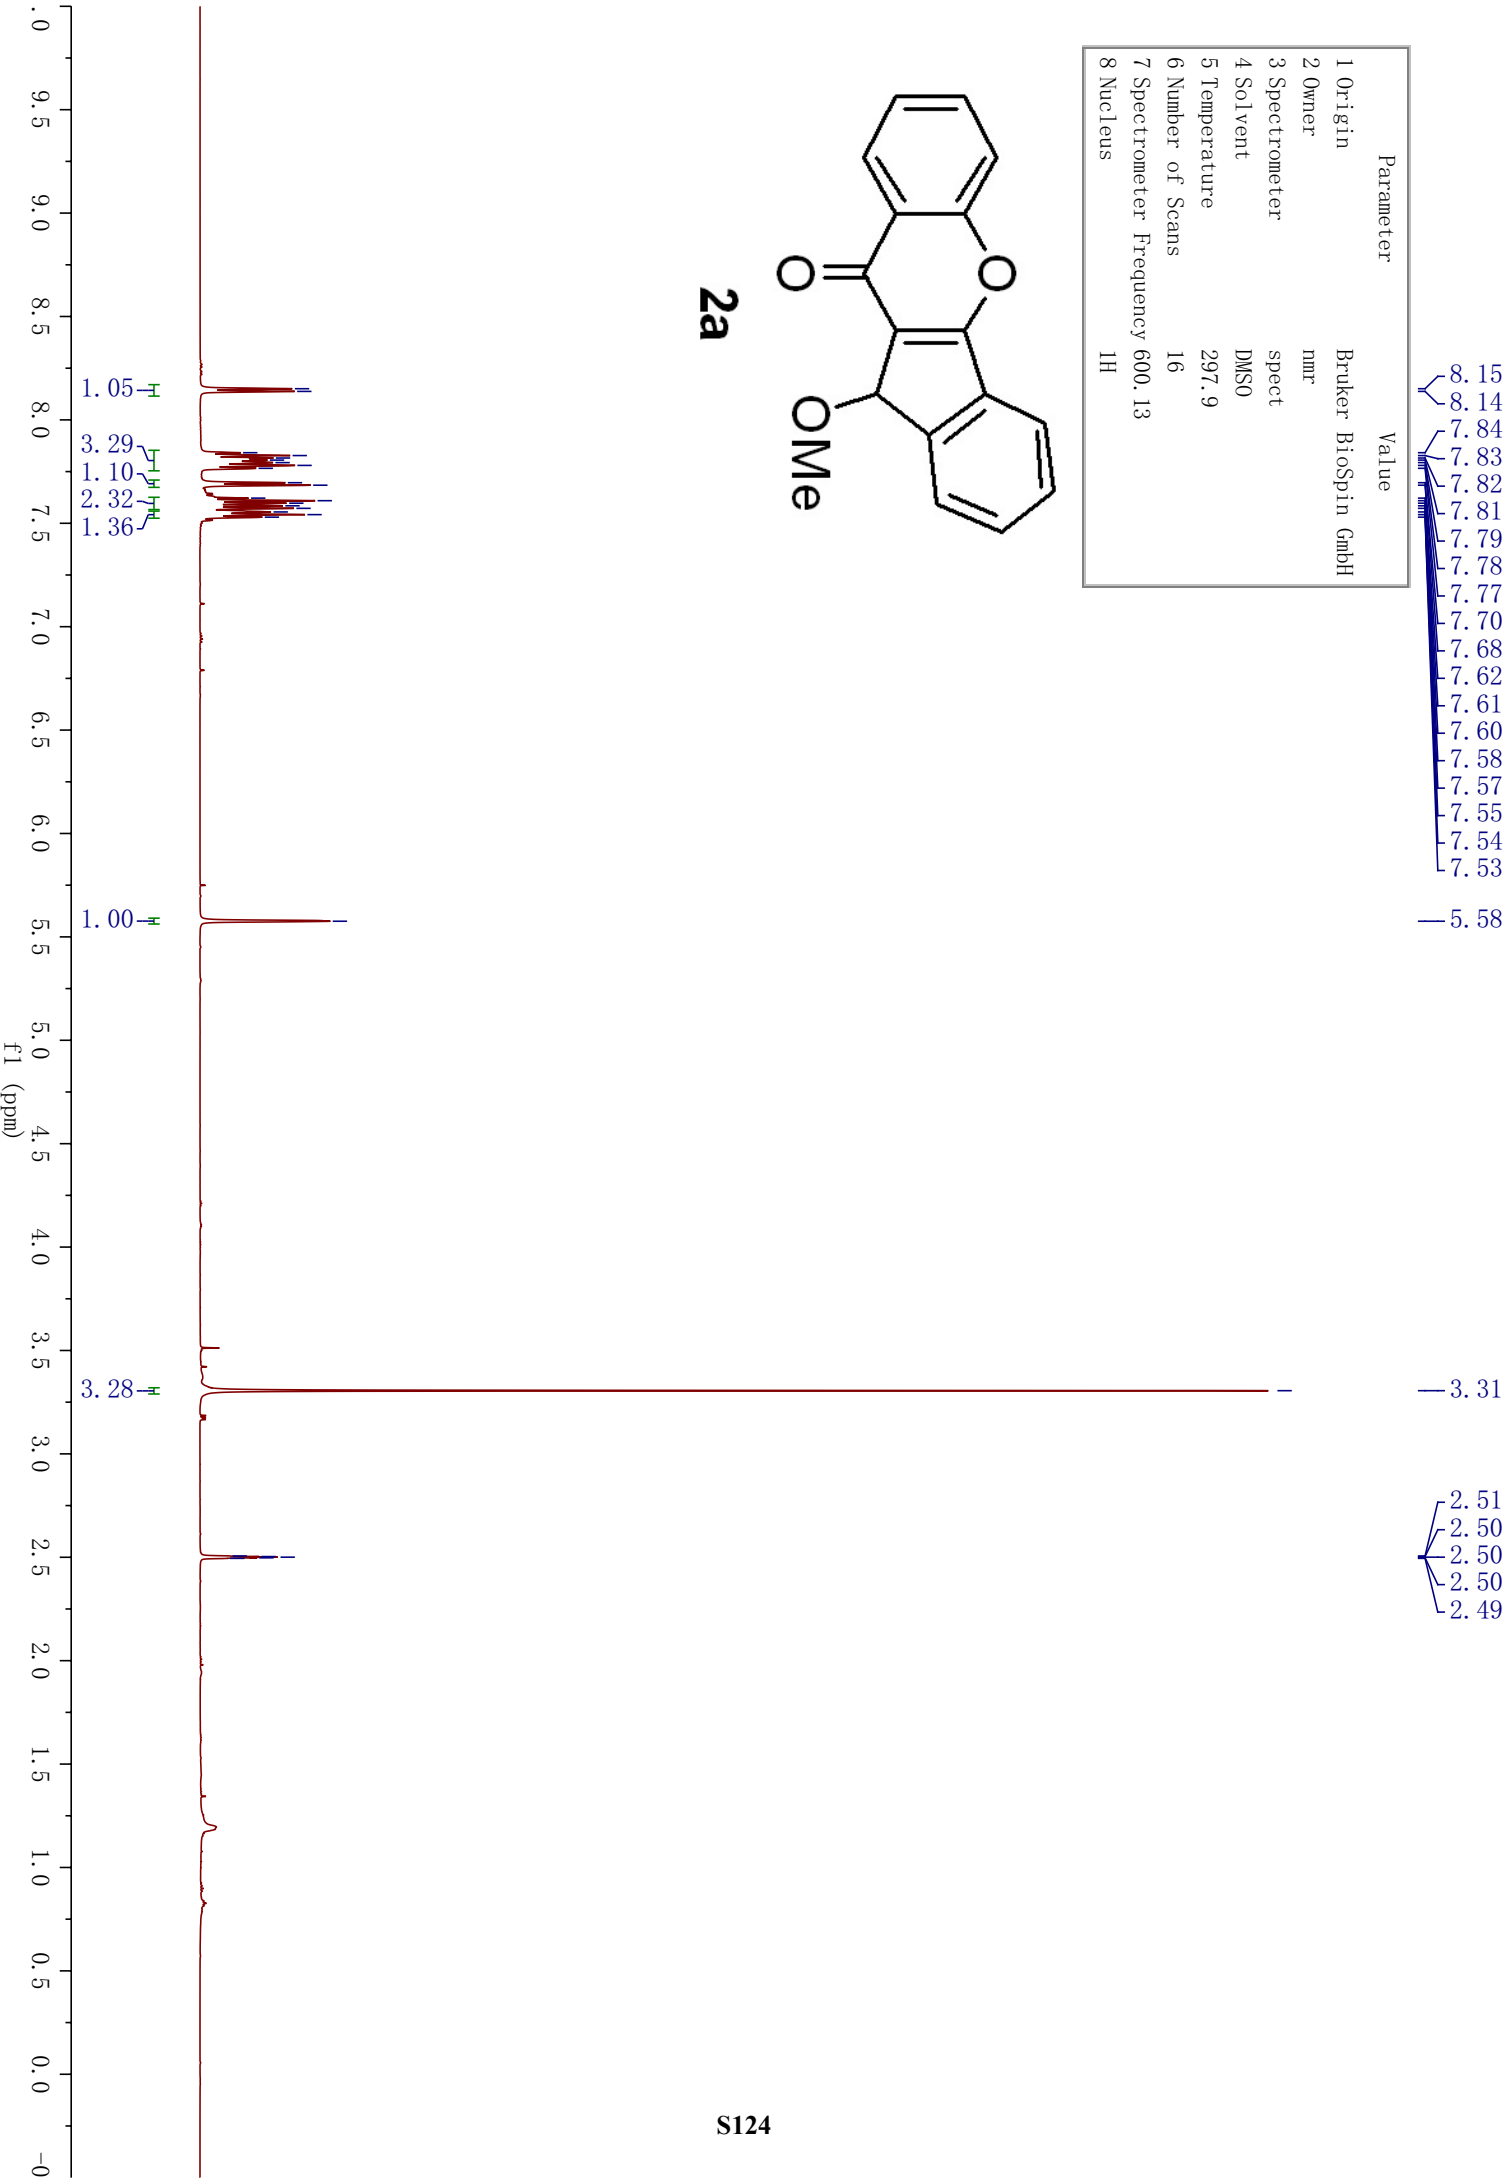

| Parameter                | Value                |
|--------------------------|----------------------|
| 1 Origin                 | Brucker BioSpin GmbH |
| 2 Owner                  | nmr                  |
| 3 Spectrometer           | spect                |
| 4 Solvent                | DMSO                 |
| 5 Temperature            | 297.9                |
| 6 Number of Scans        | 543                  |
| 7 Spectrometer Frequency | 150.90               |
| 8 Nucleus                | <sup>13</sup> C      |

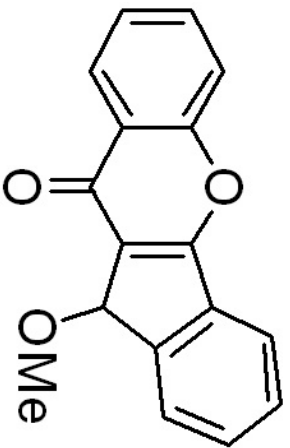

**2a**

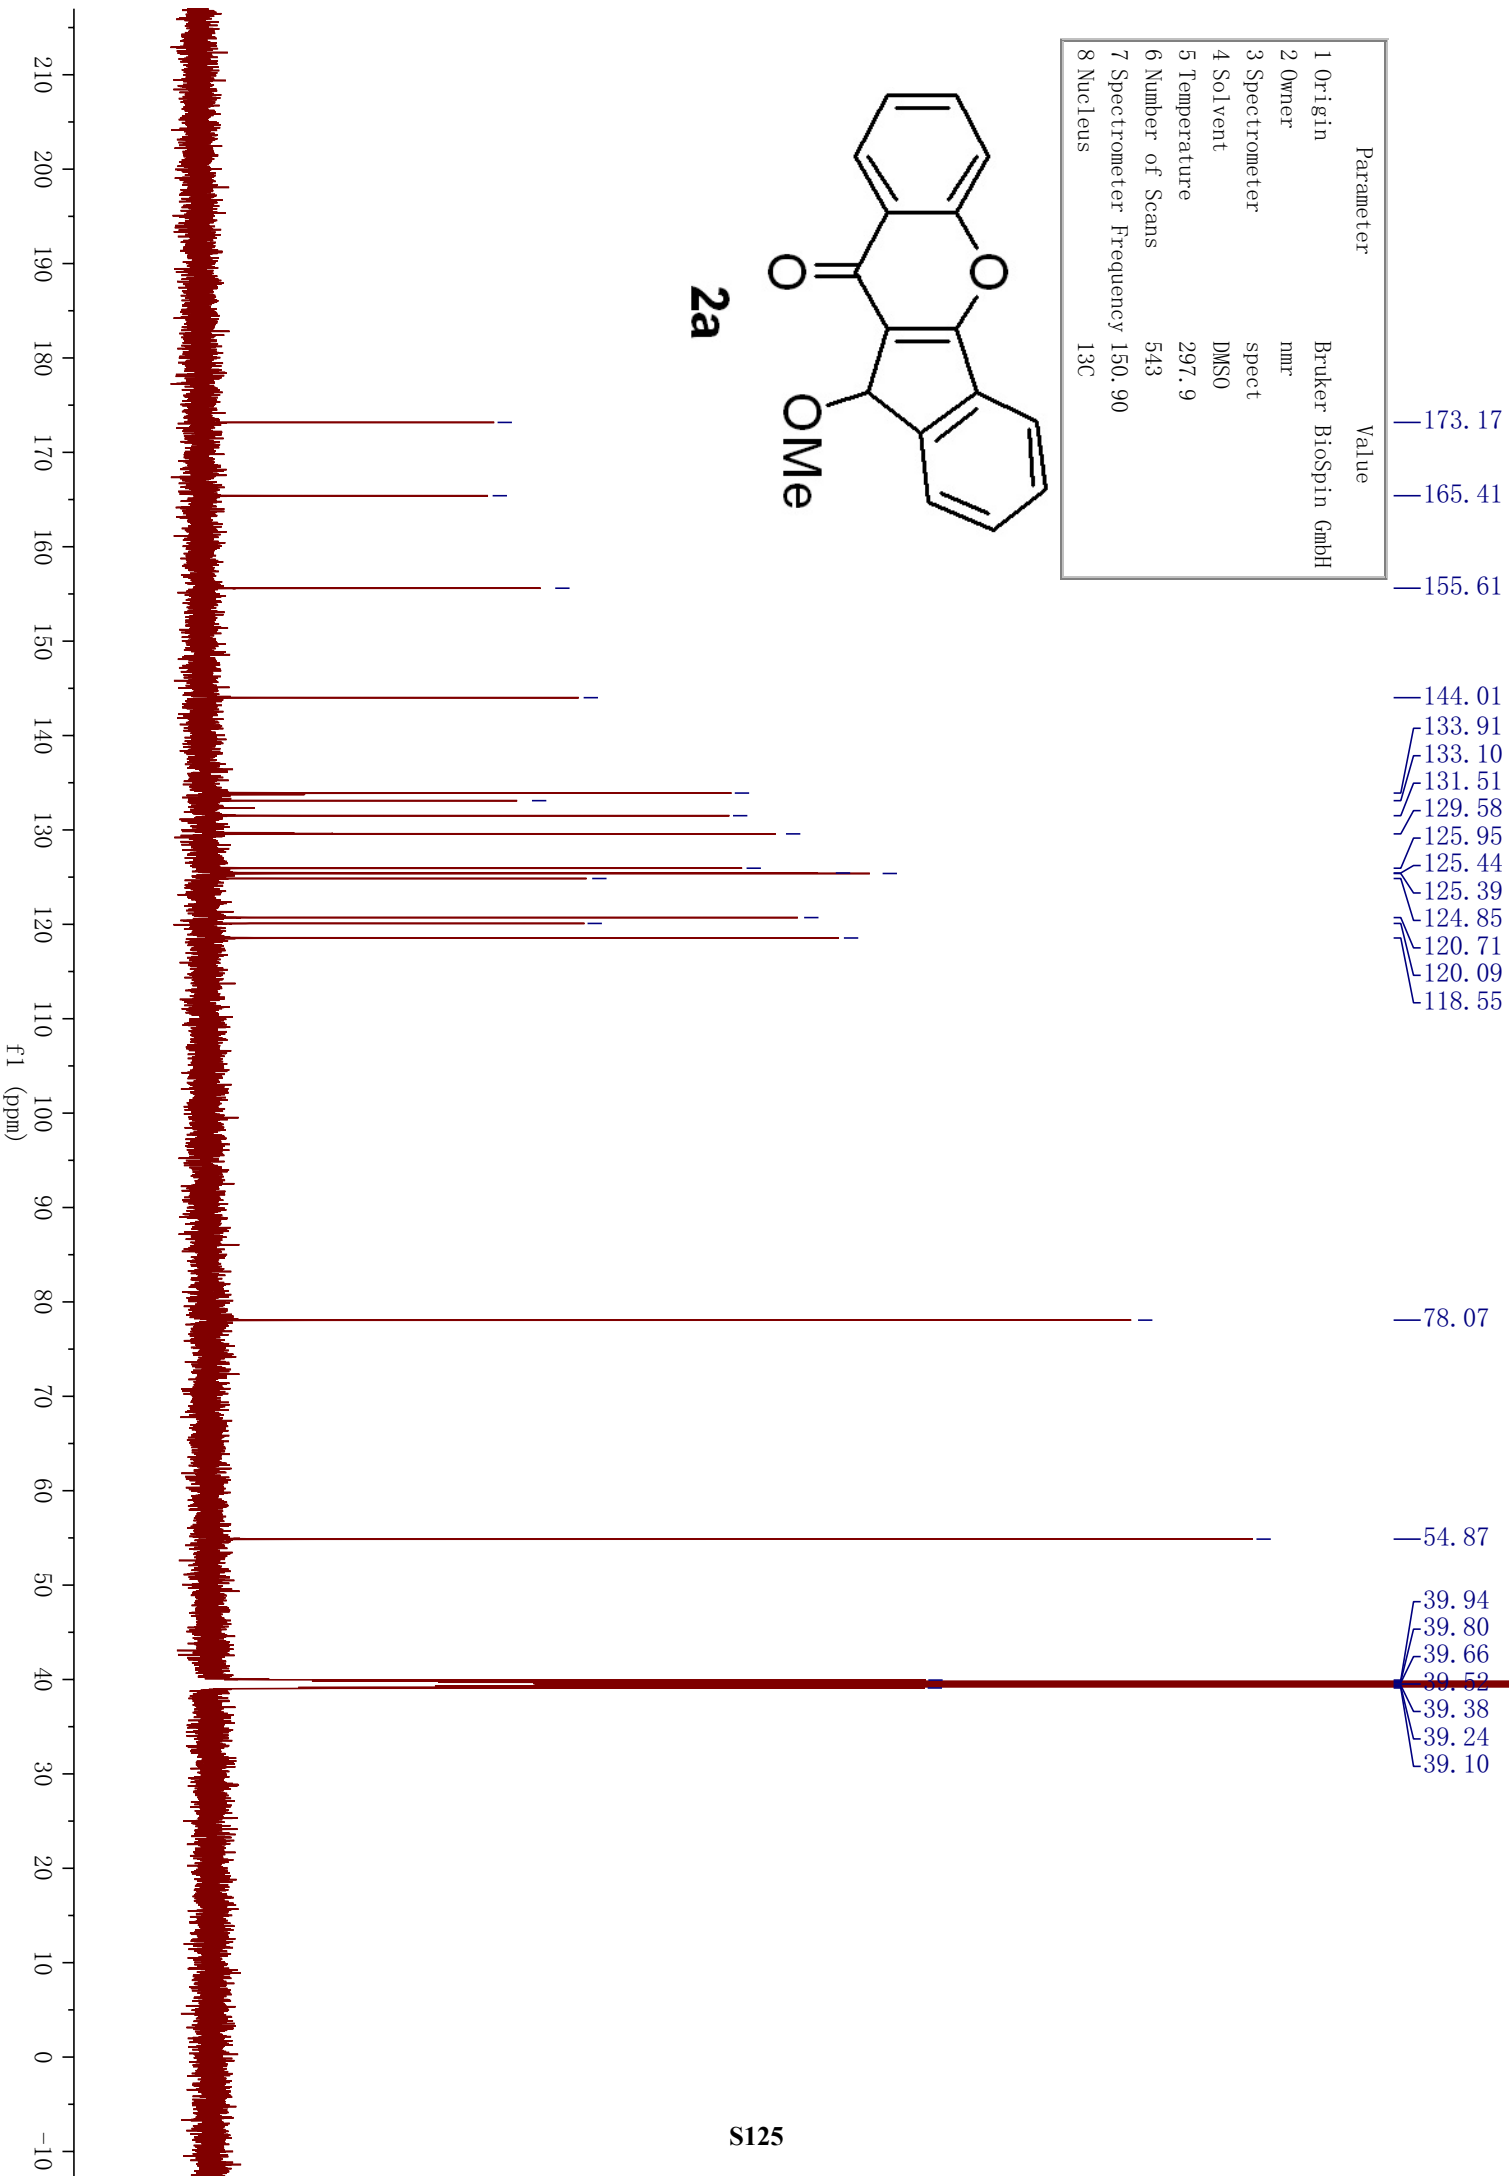

| Parameter                | Value |
|--------------------------|-------|
| 1 Origin                 | 7.76  |
| 2 Owner                  | 7.74  |
| 3 Spectrometer           | 7.72  |
| 4 Solvent                | 7.71  |
| 5 Temperature            | 7.69  |
| 6 Number of Scans        | 7.68  |
| 7 Spectrometer Frequency | 7.54  |
| 8 Nucleus                | 7.52  |
|                          | 7.51  |
|                          | 7.49  |
|                          | 7.48  |
|                          | 7.28  |
|                          | 7.28  |
|                          | 7.27  |
|                          | 7.26  |

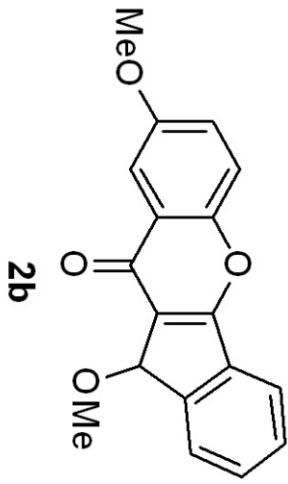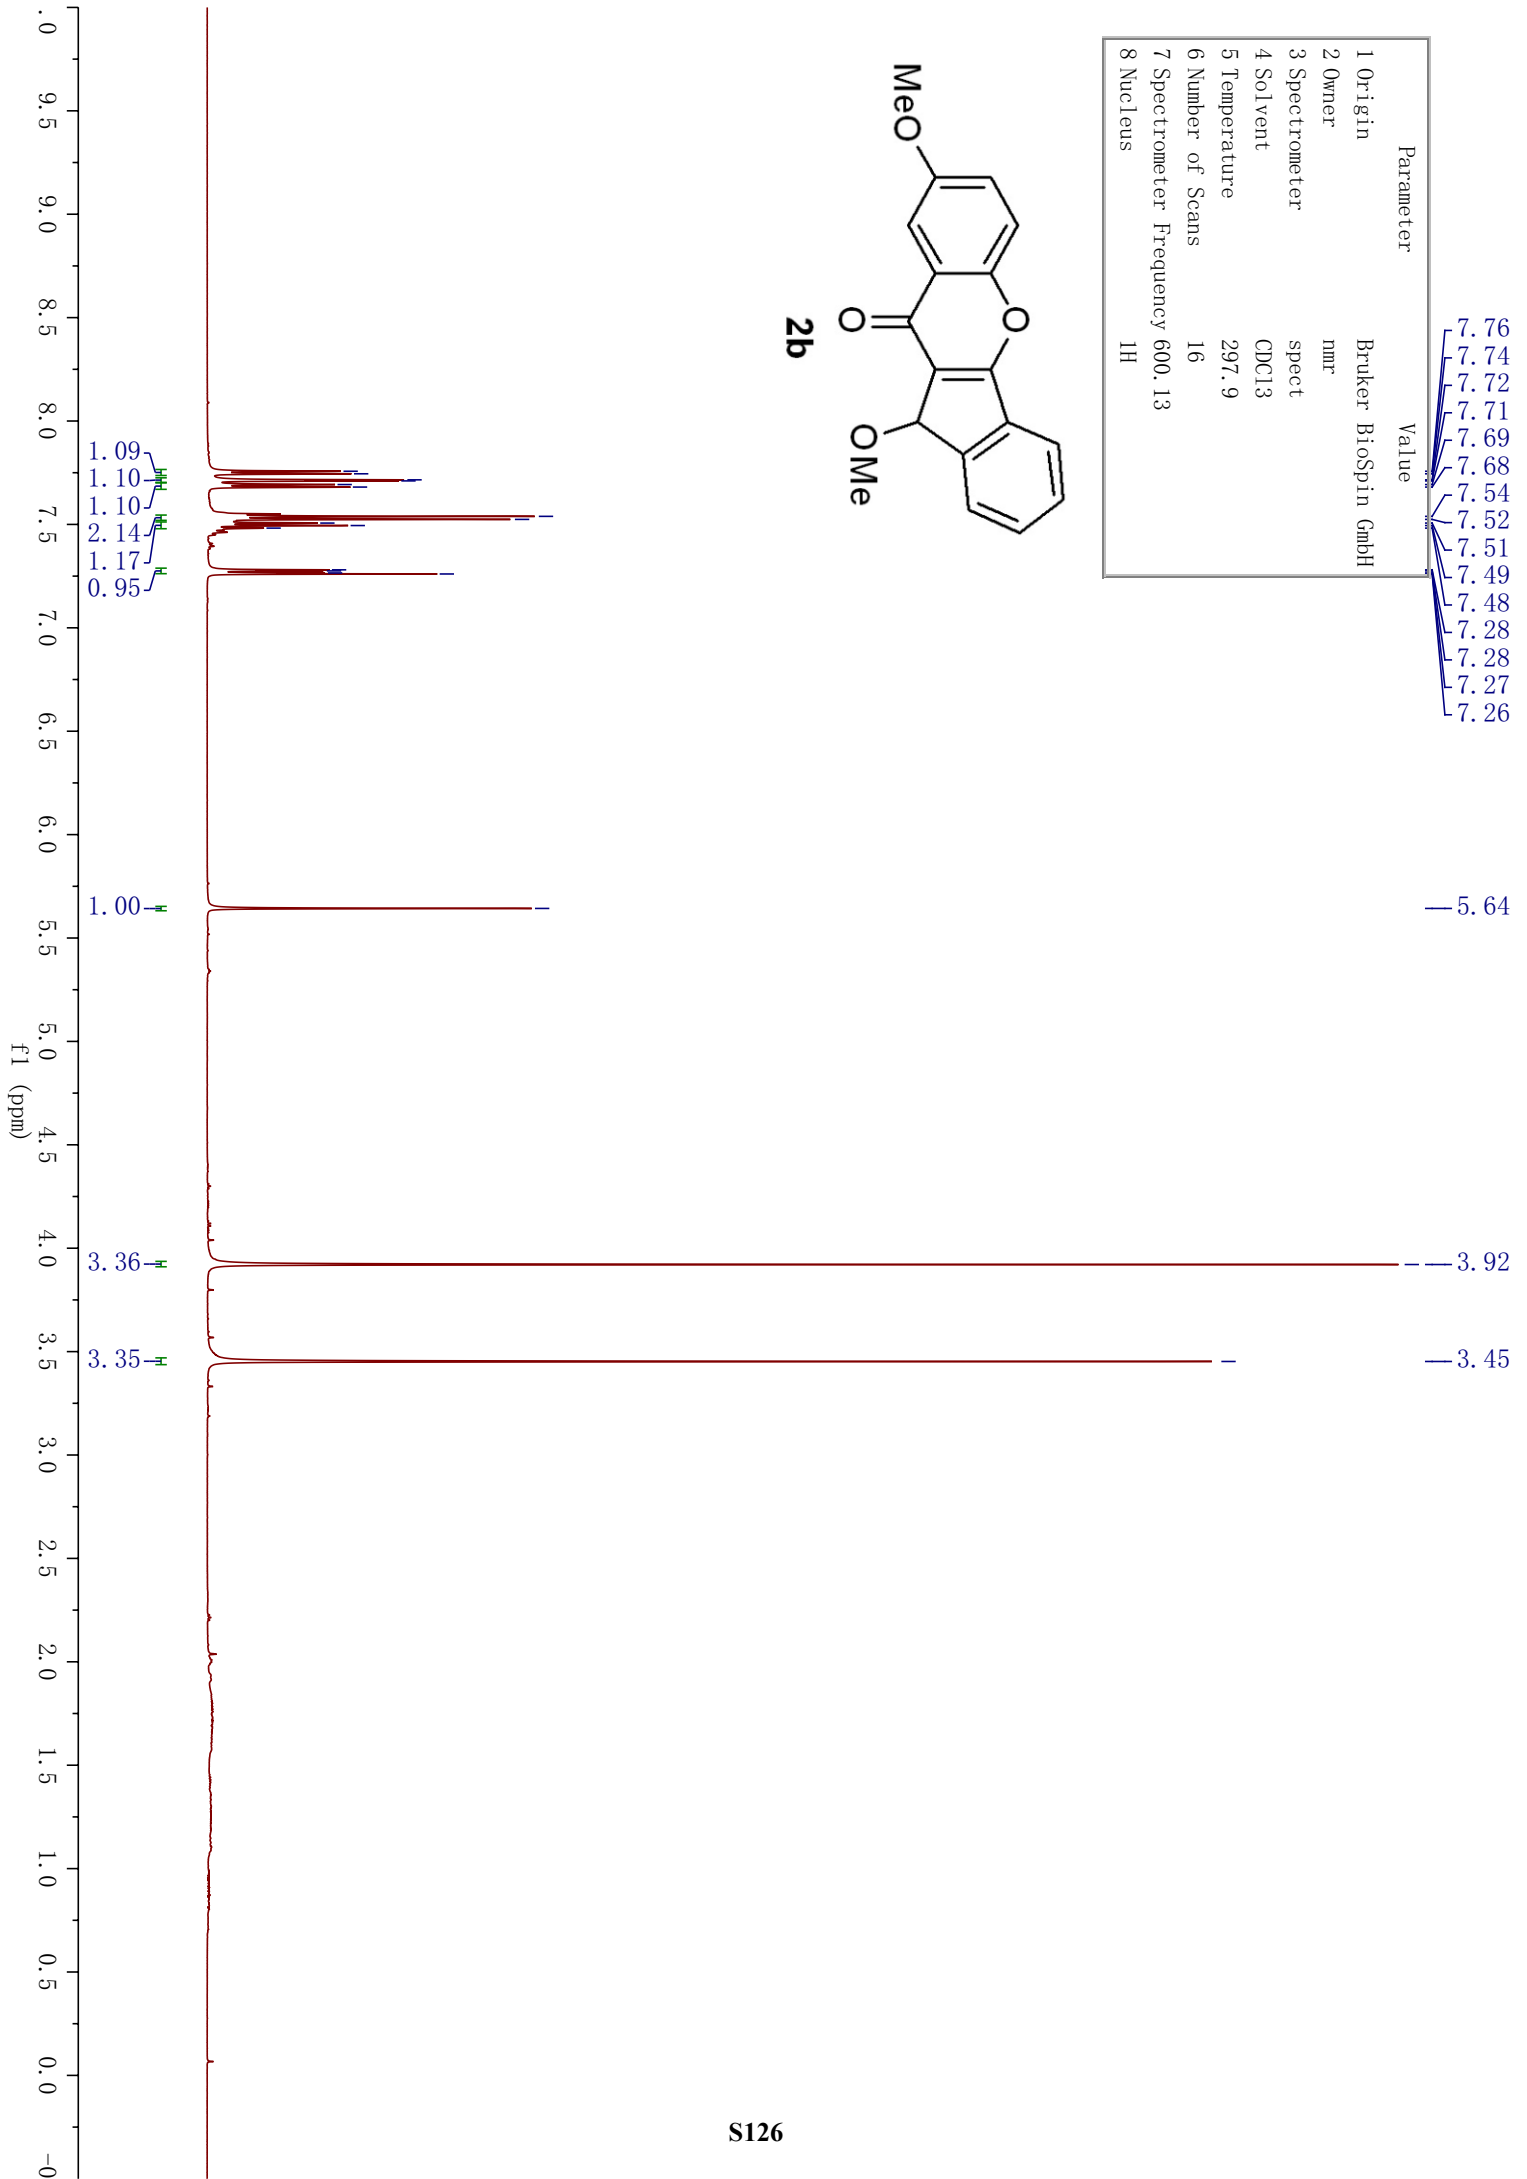

| Parameter                | Value                |
|--------------------------|----------------------|
| 1 Origin                 | Brucker Biospin GmbH |
| 2 Owner                  | nmr                  |
| 3 Spectrometer           | spect                |
| 4 Solvent                | CDCl3                |
| 5 Temperature            | 297.9                |
| 6 Number of Scans        | 252                  |
| 7 Spectrometer Frequency | 150.90               |
| 8 Nucleus                | <sup>13</sup> C      |

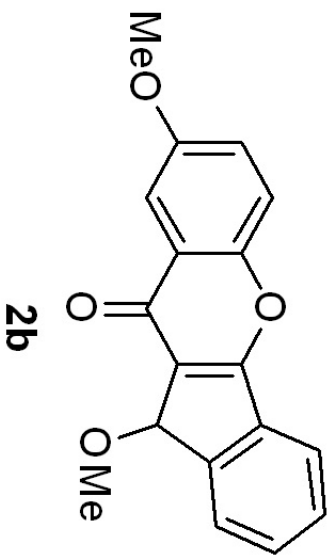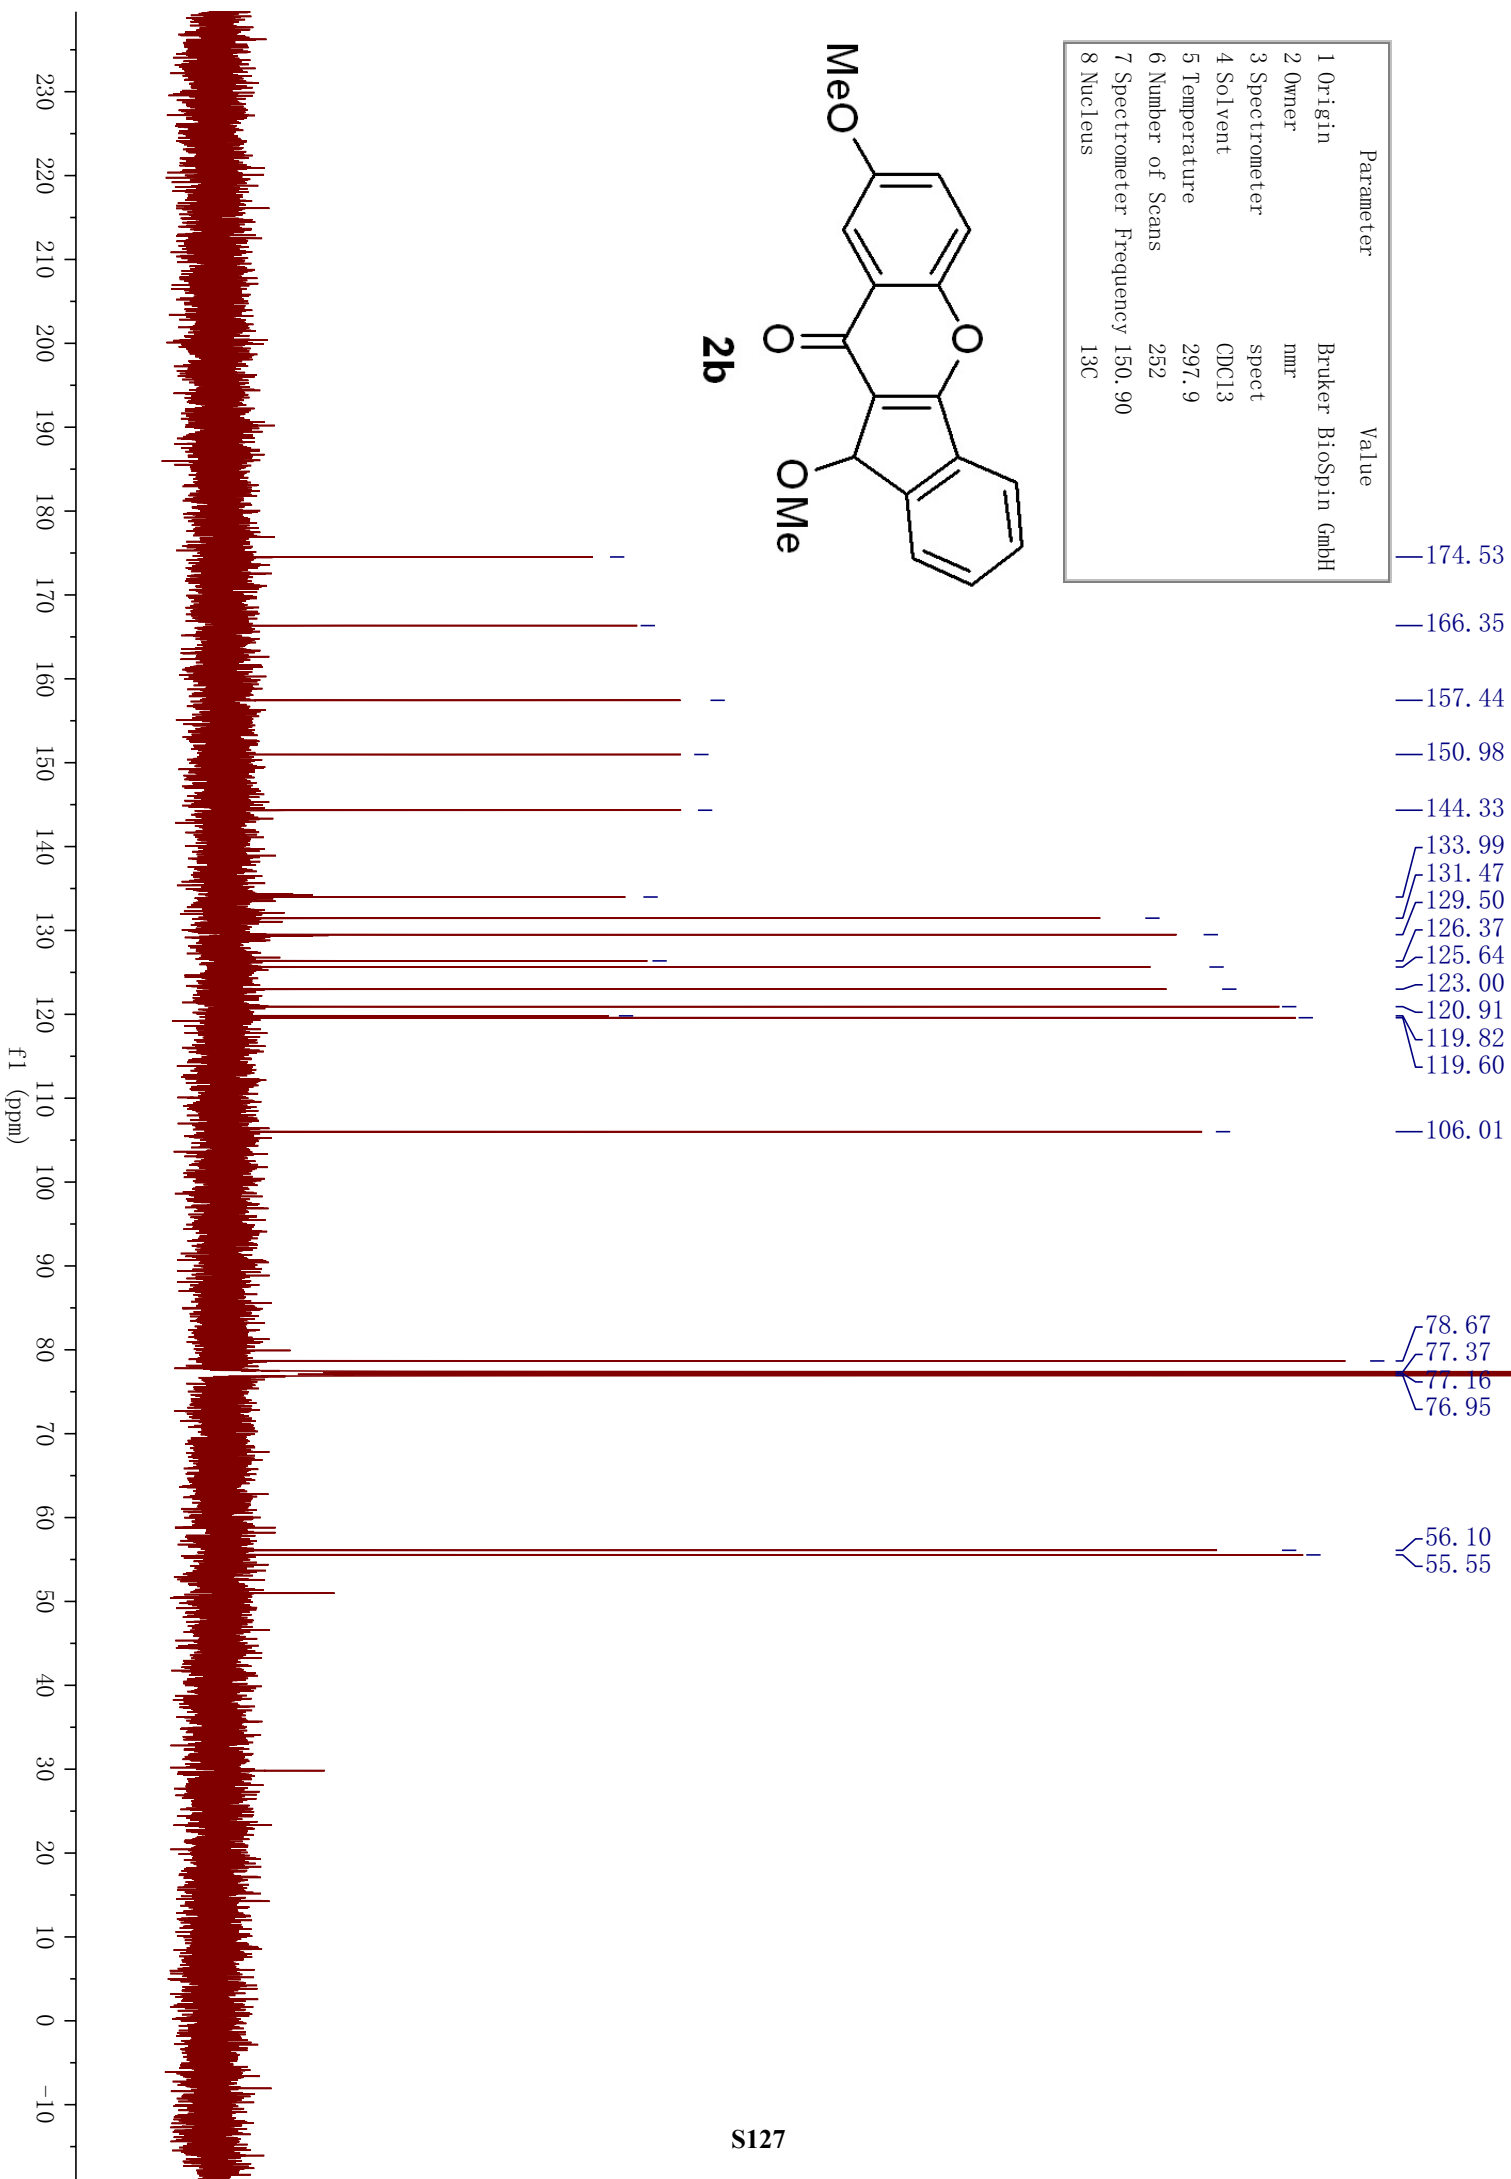

7.98  
7.97  
7.96  
7.96  
7.77  
7.75  
7.70  
7.69  
7.62  
7.61  
7.61  
7.60  
7.57  
7.56  
7.55  
7.52  
7.51  
7.43  
7.42  
7.41  
7.41  
7.41  
7.40  
7.39  
7.26

| Parameter                | Value                |
|--------------------------|----------------------|
| 1 Origin                 | Brucker Biospin GmbH |
| 2 Owner                  | nmr                  |
| 3 Spectrometer           | spect                |
| 4 Solvent                | CDCl3                |
| 5 Temperature            | 297.9                |
| 6 Number of Scans        | 16                   |
| 7 Spectrometer Frequency | 600.13               |
| 8 Nucleus                | 1H                   |

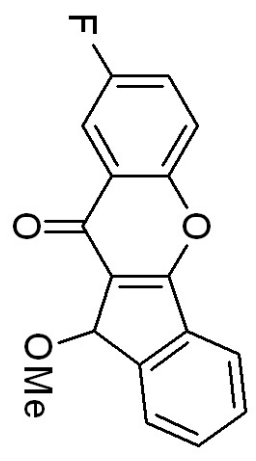

**2c**

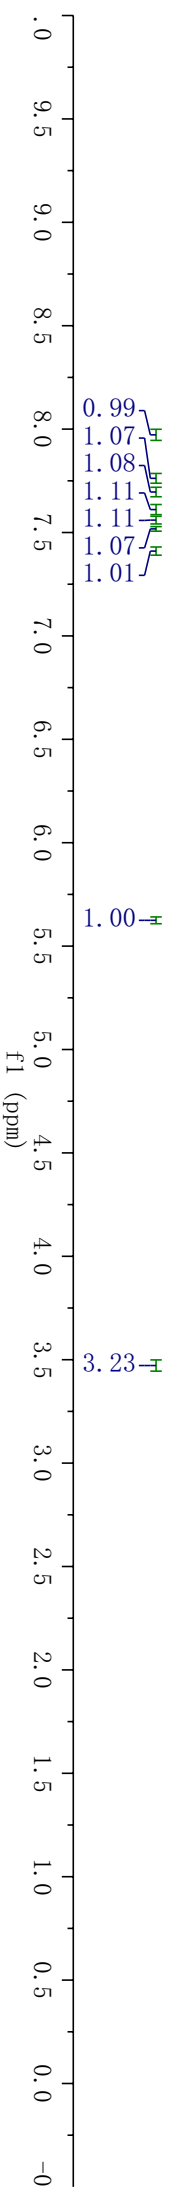

| Parameter                | Value                |
|--------------------------|----------------------|
| 1 Origin                 | Brucker Biospin GmbH |
| 2 Owner                  | nmr                  |
| 3 Spectrometer           | spect                |
| 4 Solvent                | CDCl3                |
| 5 Temperature            | 297.9                |
| 6 Number of Scans        | 227                  |
| 7 Spectrometer Frequency | 150.90               |
| 8 Nucleus                | <sup>13</sup> C      |

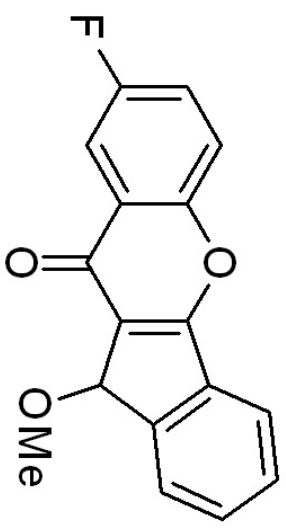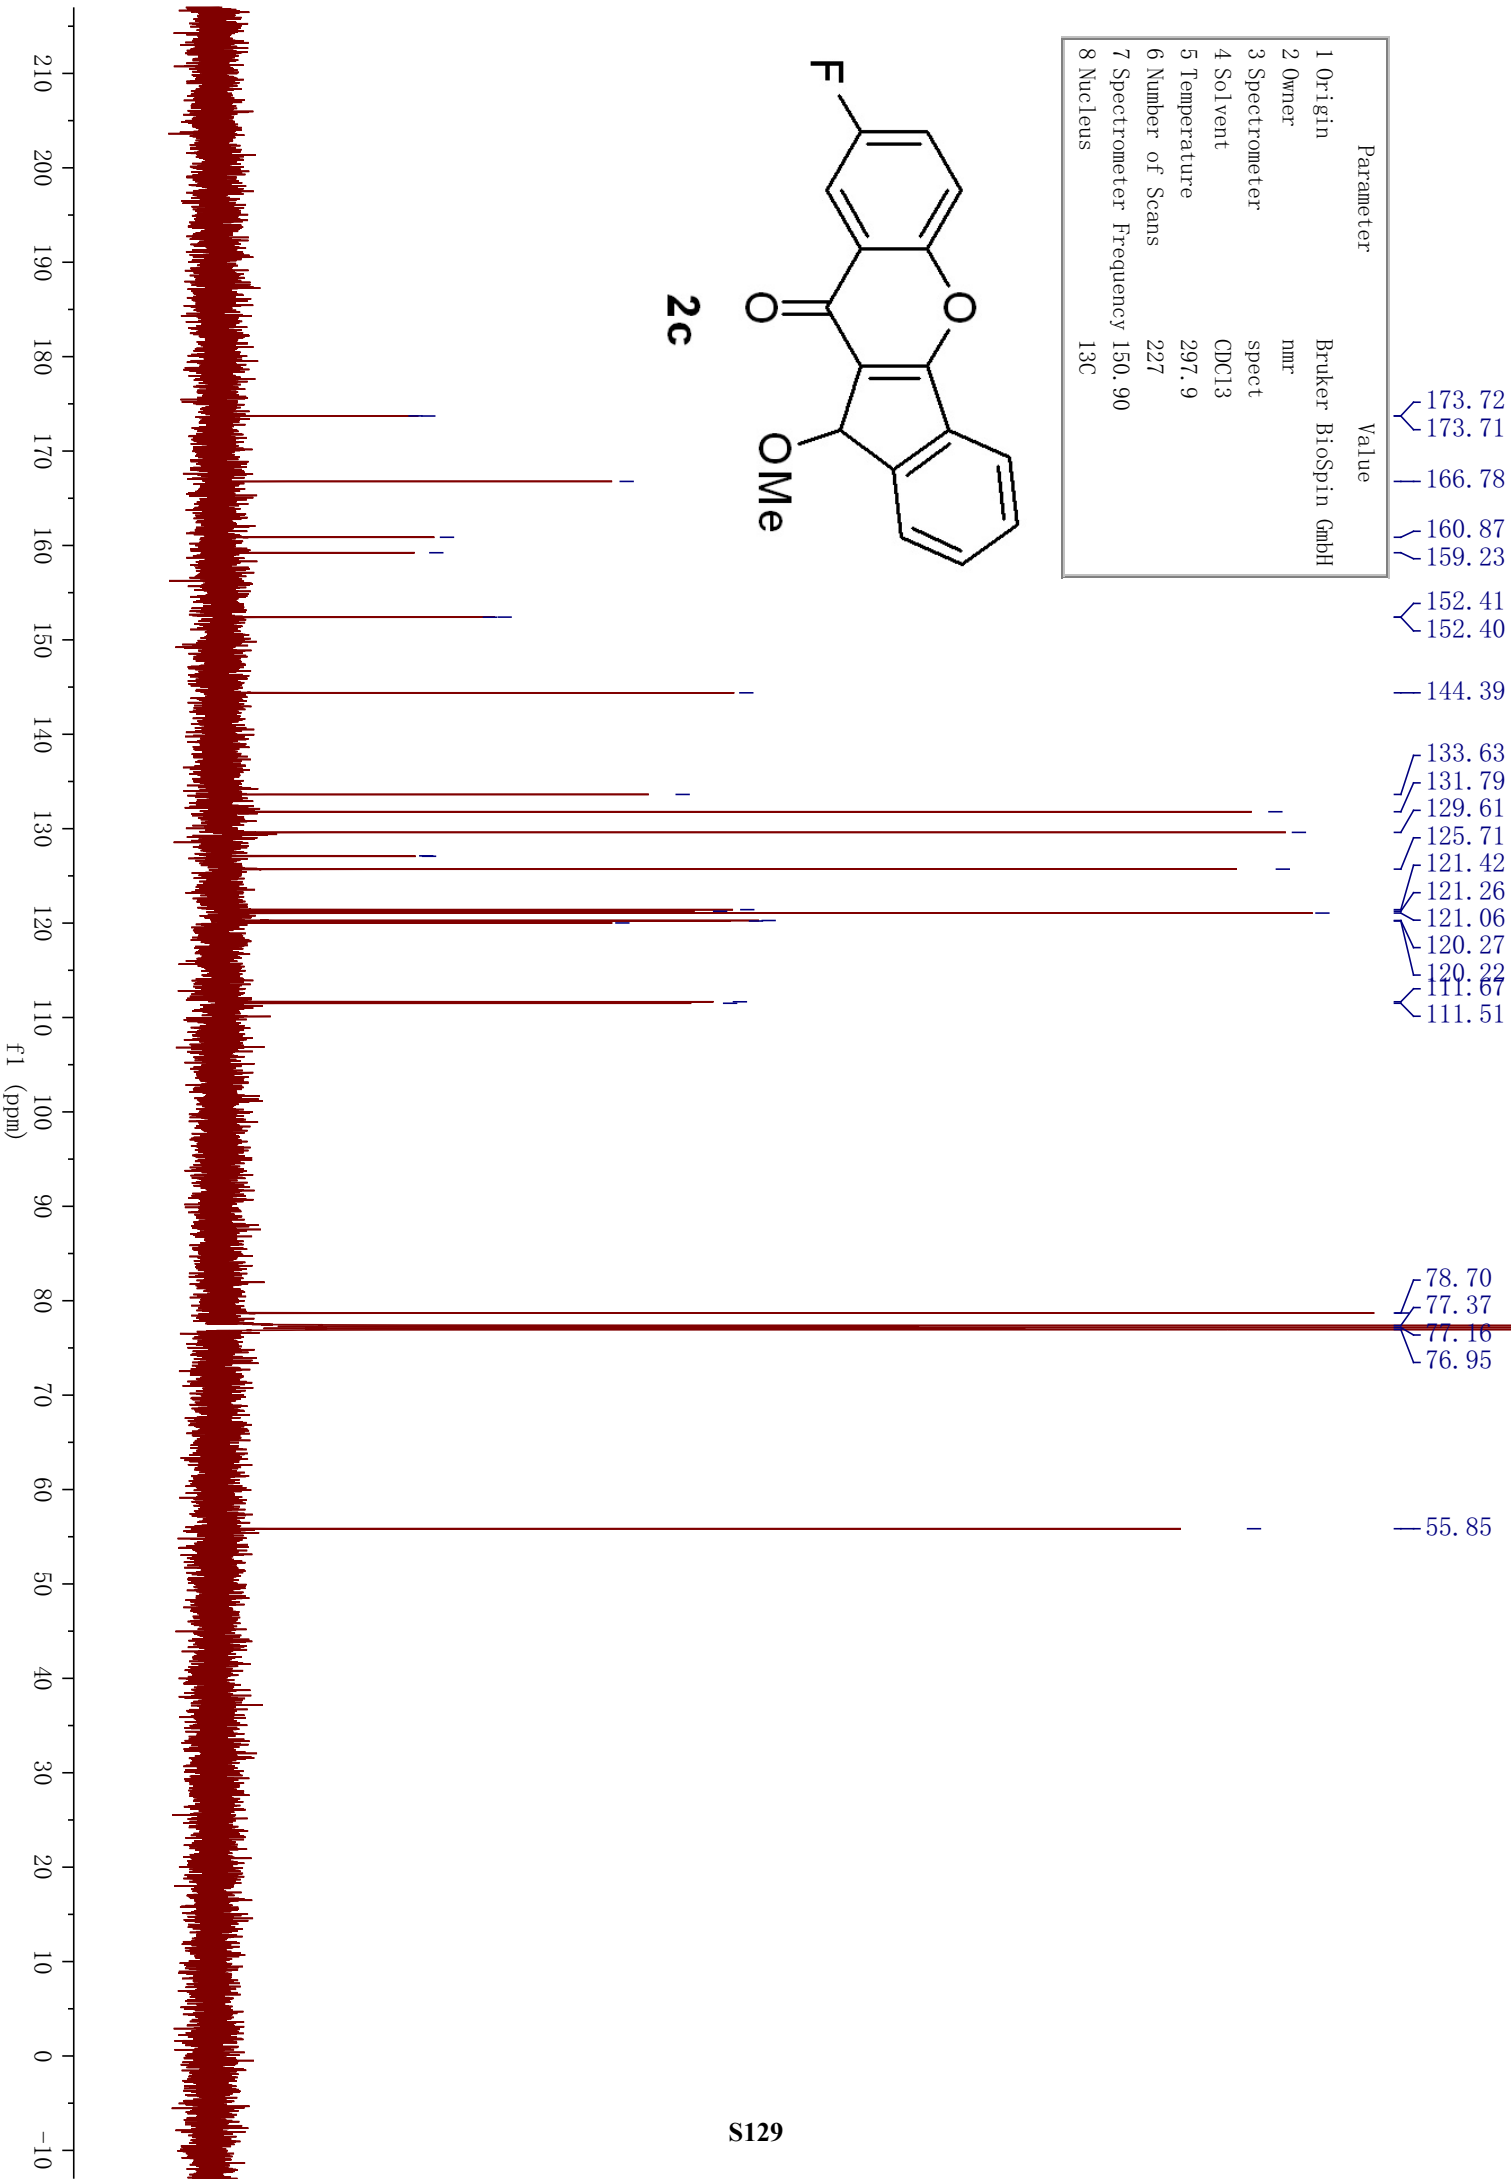

| Parameter                | Value                |
|--------------------------|----------------------|
| 1 Origin                 | Brucker Biospin GmbH |
| 2 Owner                  | nmr                  |
| 3 Spectrometer           | spect                |
| 4 Solvent                | CDCl3                |
| 5 Temperature            | 297.9                |
| 6 Number of Scans        | 16                   |
| 7 Spectrometer Frequency | 600.13               |
| 8 Nucleus                | <sup>1</sup> H       |

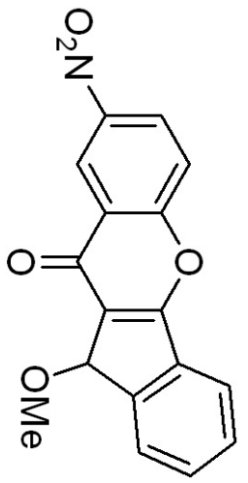

**2d**

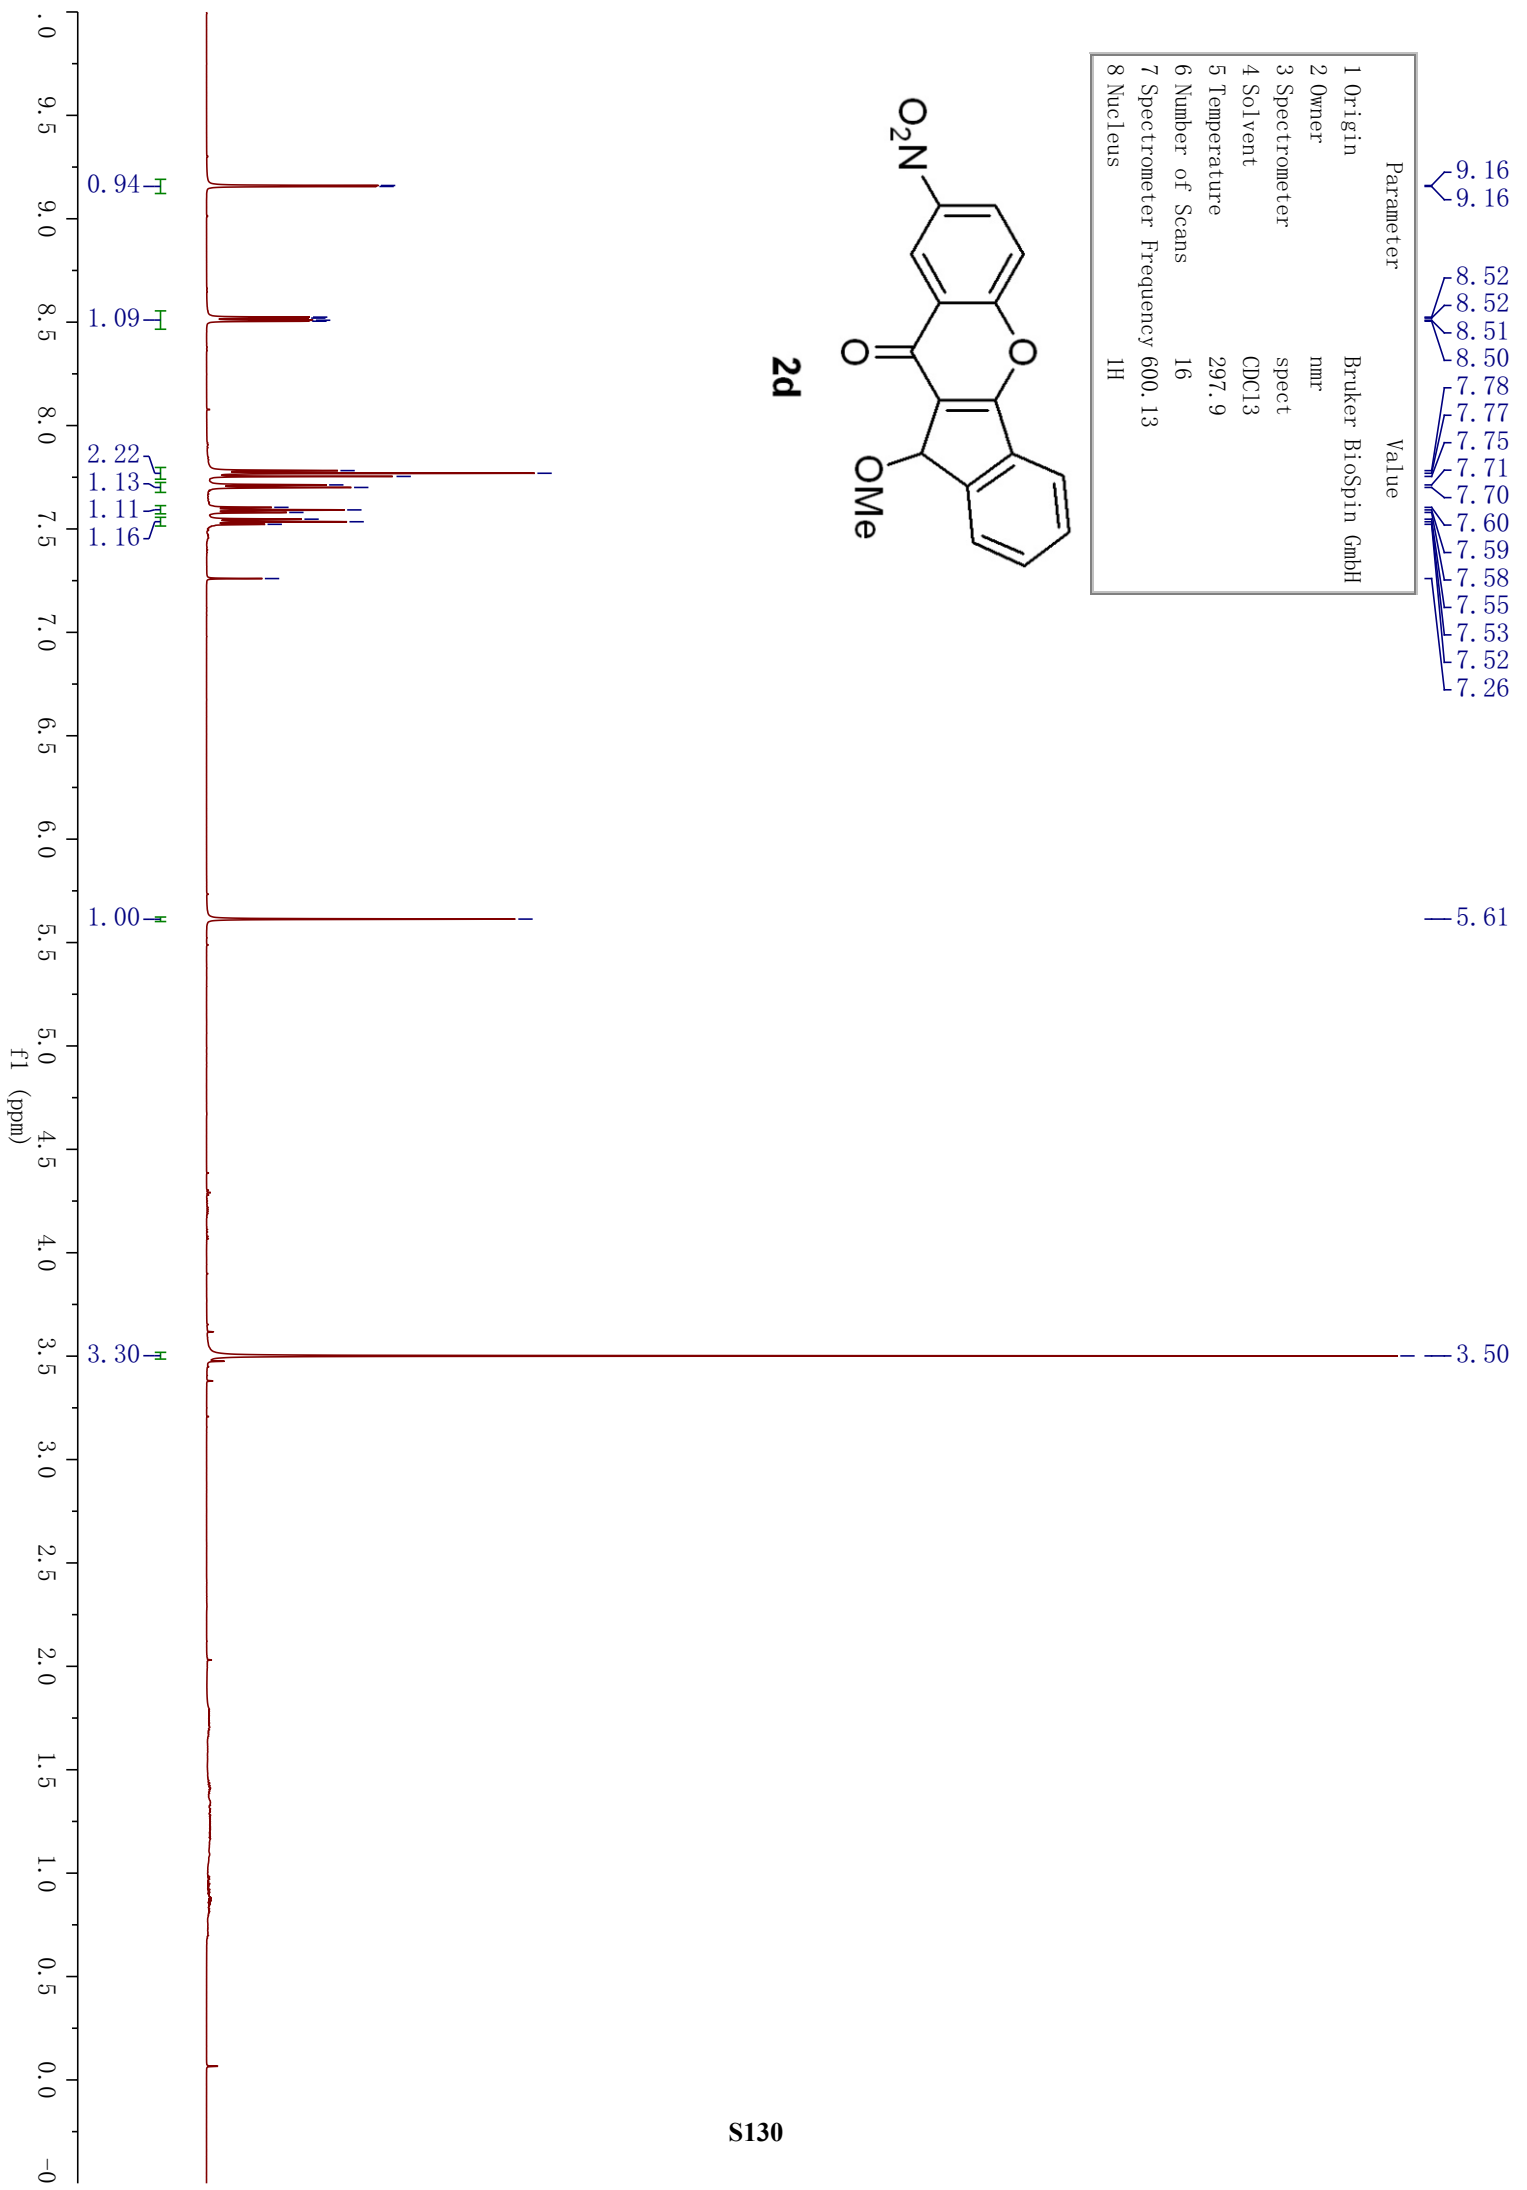

| Parameter                | Value                |
|--------------------------|----------------------|
| 1 Origin                 | Brucker BioSpin GmbH |
| 2 Owner                  | nmr                  |
| 3 Spectrometer           | spect                |
| 4 Solvent                | CDCl3                |
| 5 Temperature            | 297.9                |
| 6 Number of Scans        | 122                  |
| 7 Spectrometer Frequency | 150.90               |
| 8 Nucleus                | <sup>13</sup> C      |

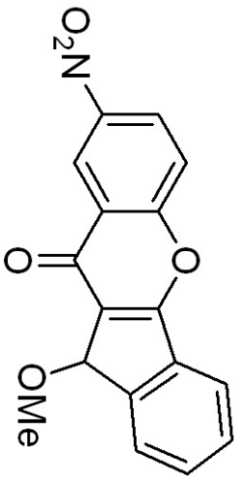

**2d**

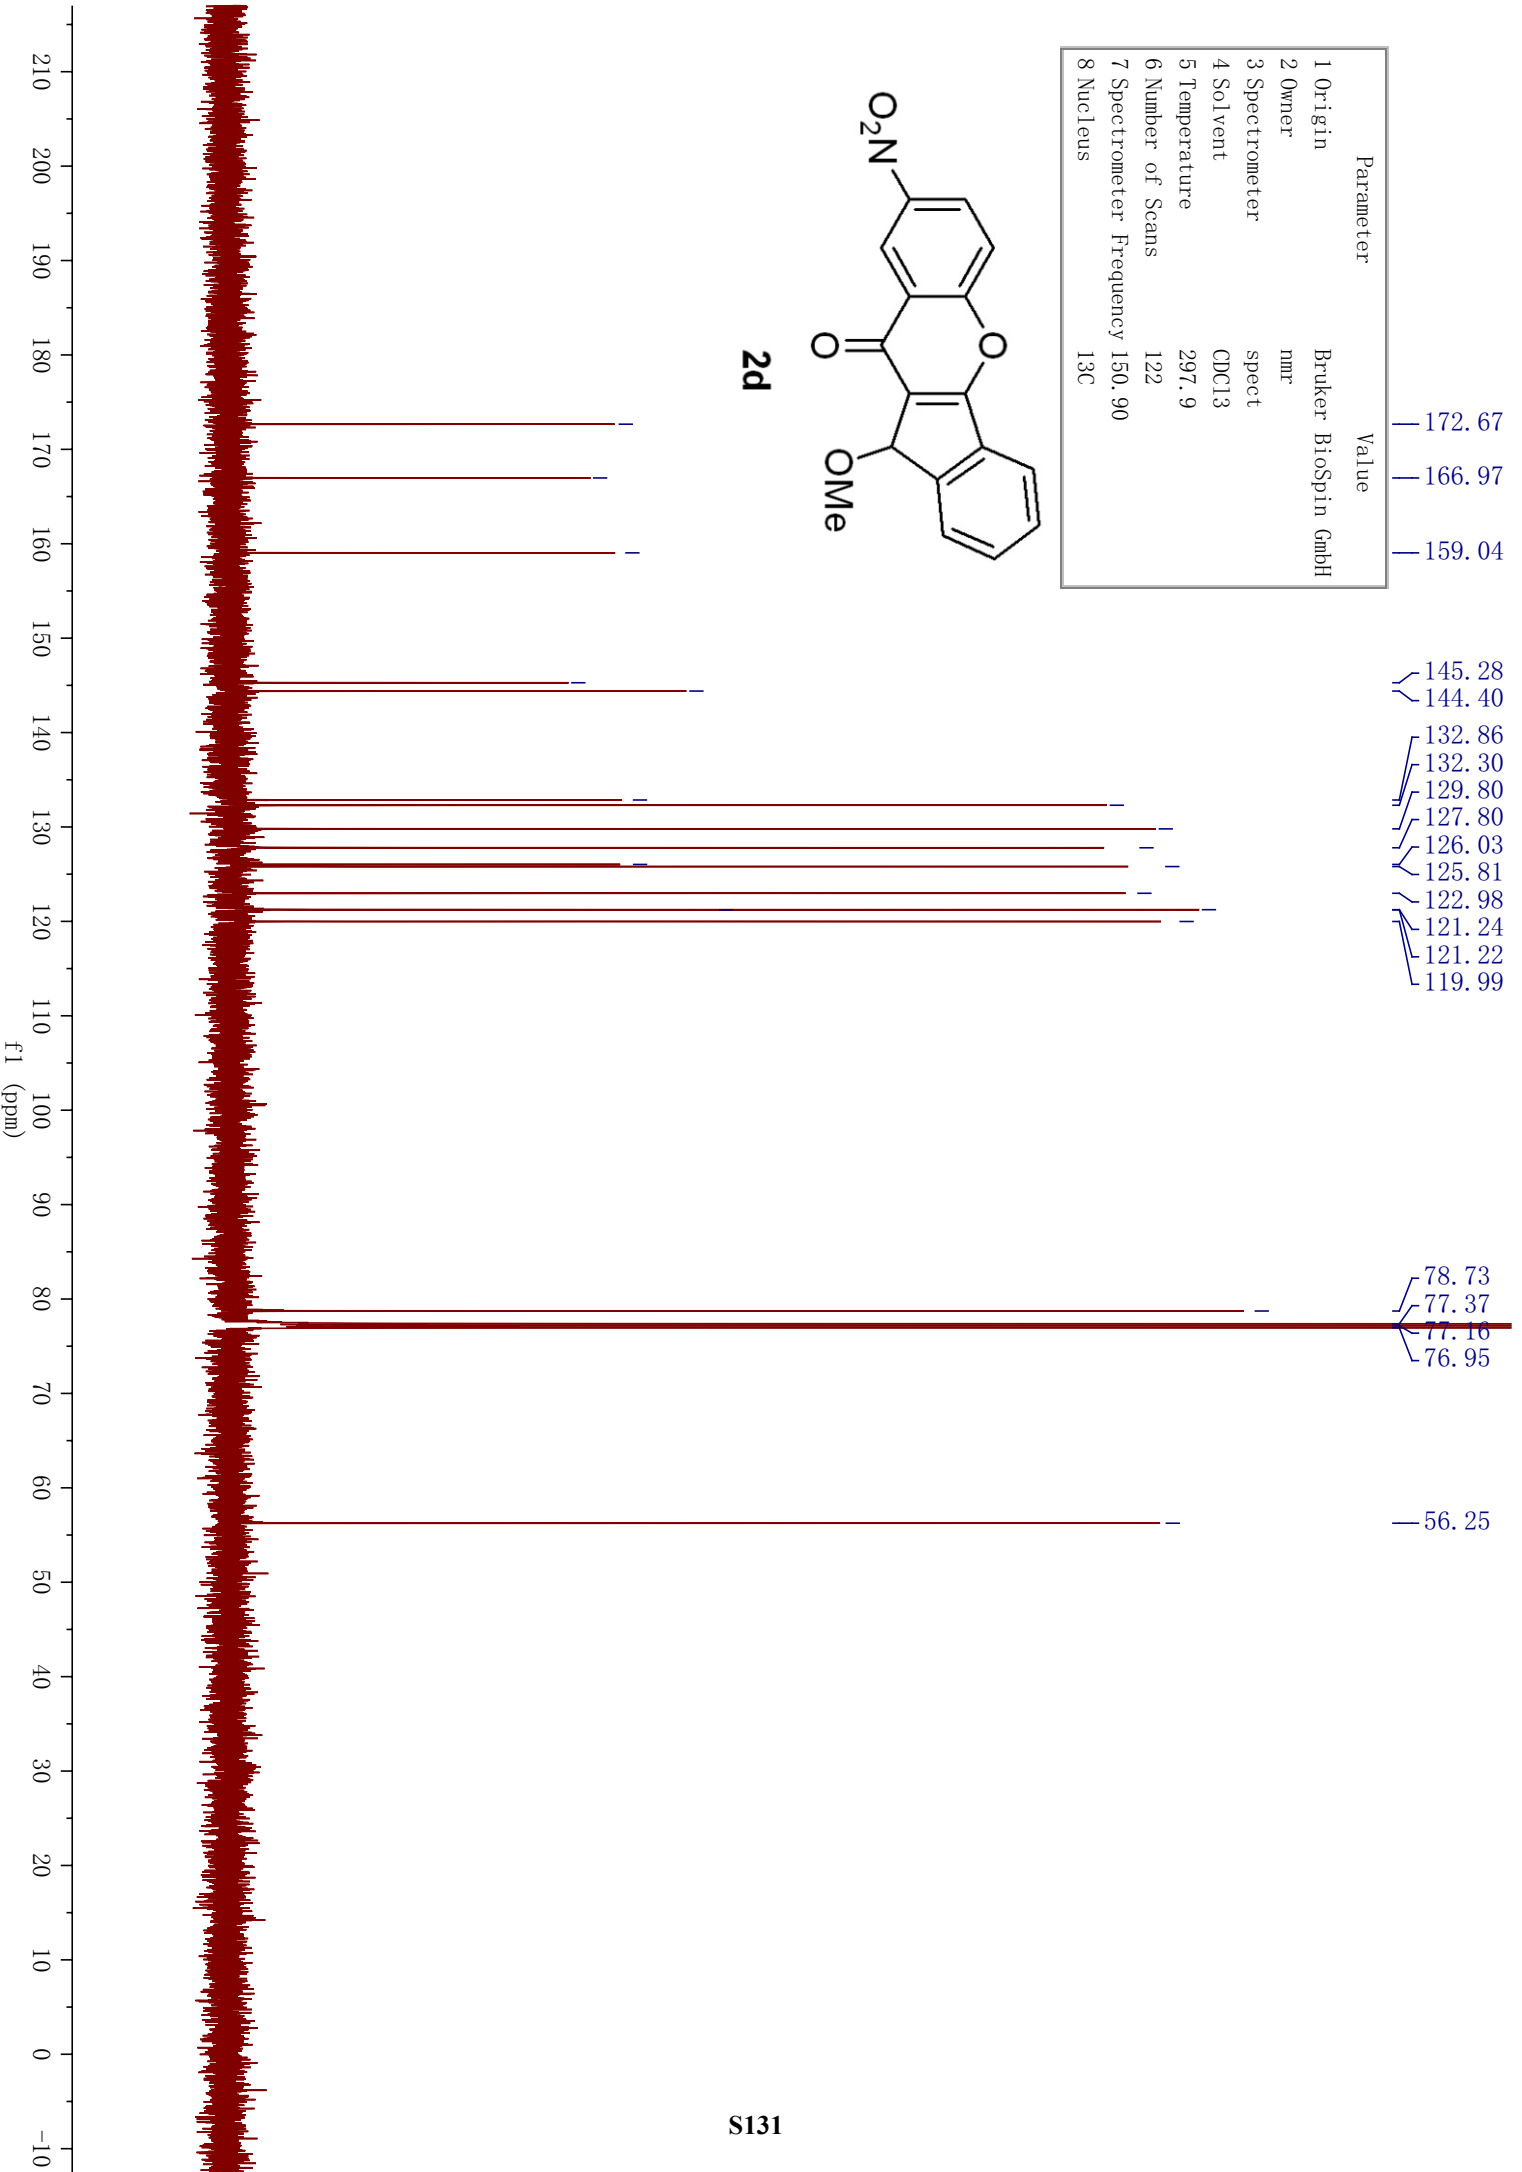



| Parameter                | Value                |
|--------------------------|----------------------|
| 1 Origin                 | Brucker Biospin GmbH |
| 2 Owner                  | nmr                  |
| 3 Spectrometer           | spect                |
| 4 Solvent                | CDCl3                |
| 5 Temperature            | 297.9                |
| 6 Number of Scans        | 16                   |
| 7 Spectrometer Frequency | 600.13               |
| 8 Nucleus                | 1H                   |

- 8.35
- 8.34
- 8.33
- 8.33
- 7.70
- 7.69
- 7.69
- 7.69
- 7.68
- 7.68
- 7.68
- 7.60
- 7.59
- 7.57
- 7.56
- 7.47
- 7.47
- 7.46
- 7.44
- 7.44
- 7.35
- 7.34
- 7.26
- 5.61

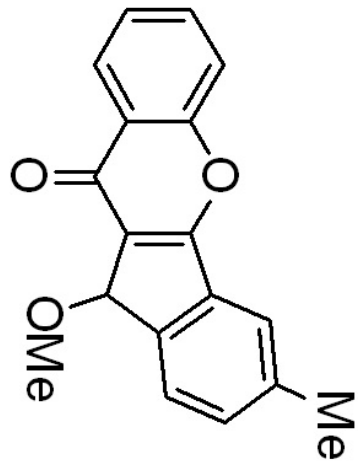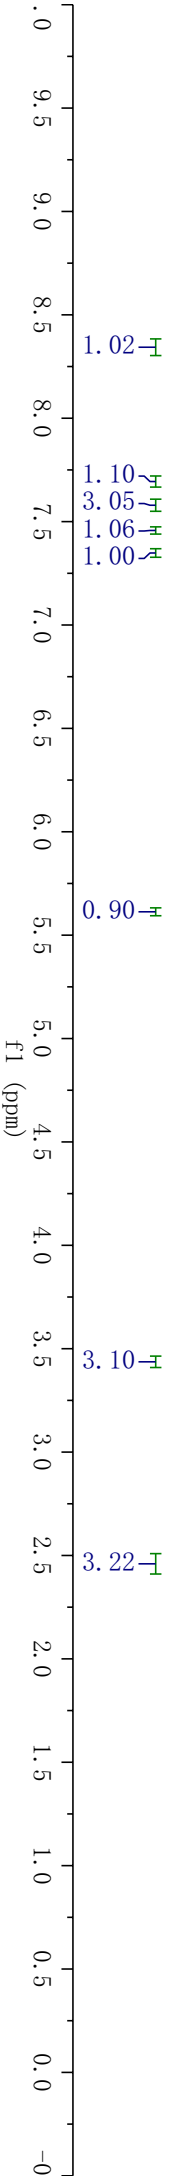

| Parameter                | Value               |
|--------------------------|---------------------|
| 1 Origin                 | Brüker Biospin GmbH |
| 2 Owner                  | nmr                 |
| 3 Spectrometer           | spect               |
| 4 Solvent                | CDCl3               |
| 5 Temperature            | 297.9               |
| 6 Number of Scans        | 1192                |
| 7 Spectrometer Frequency | 150.90              |
| 8 Nucleus                | <sup>13</sup> C     |

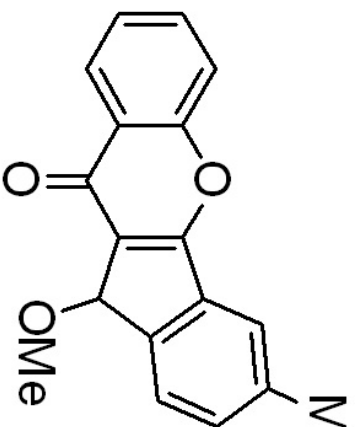

**2e**

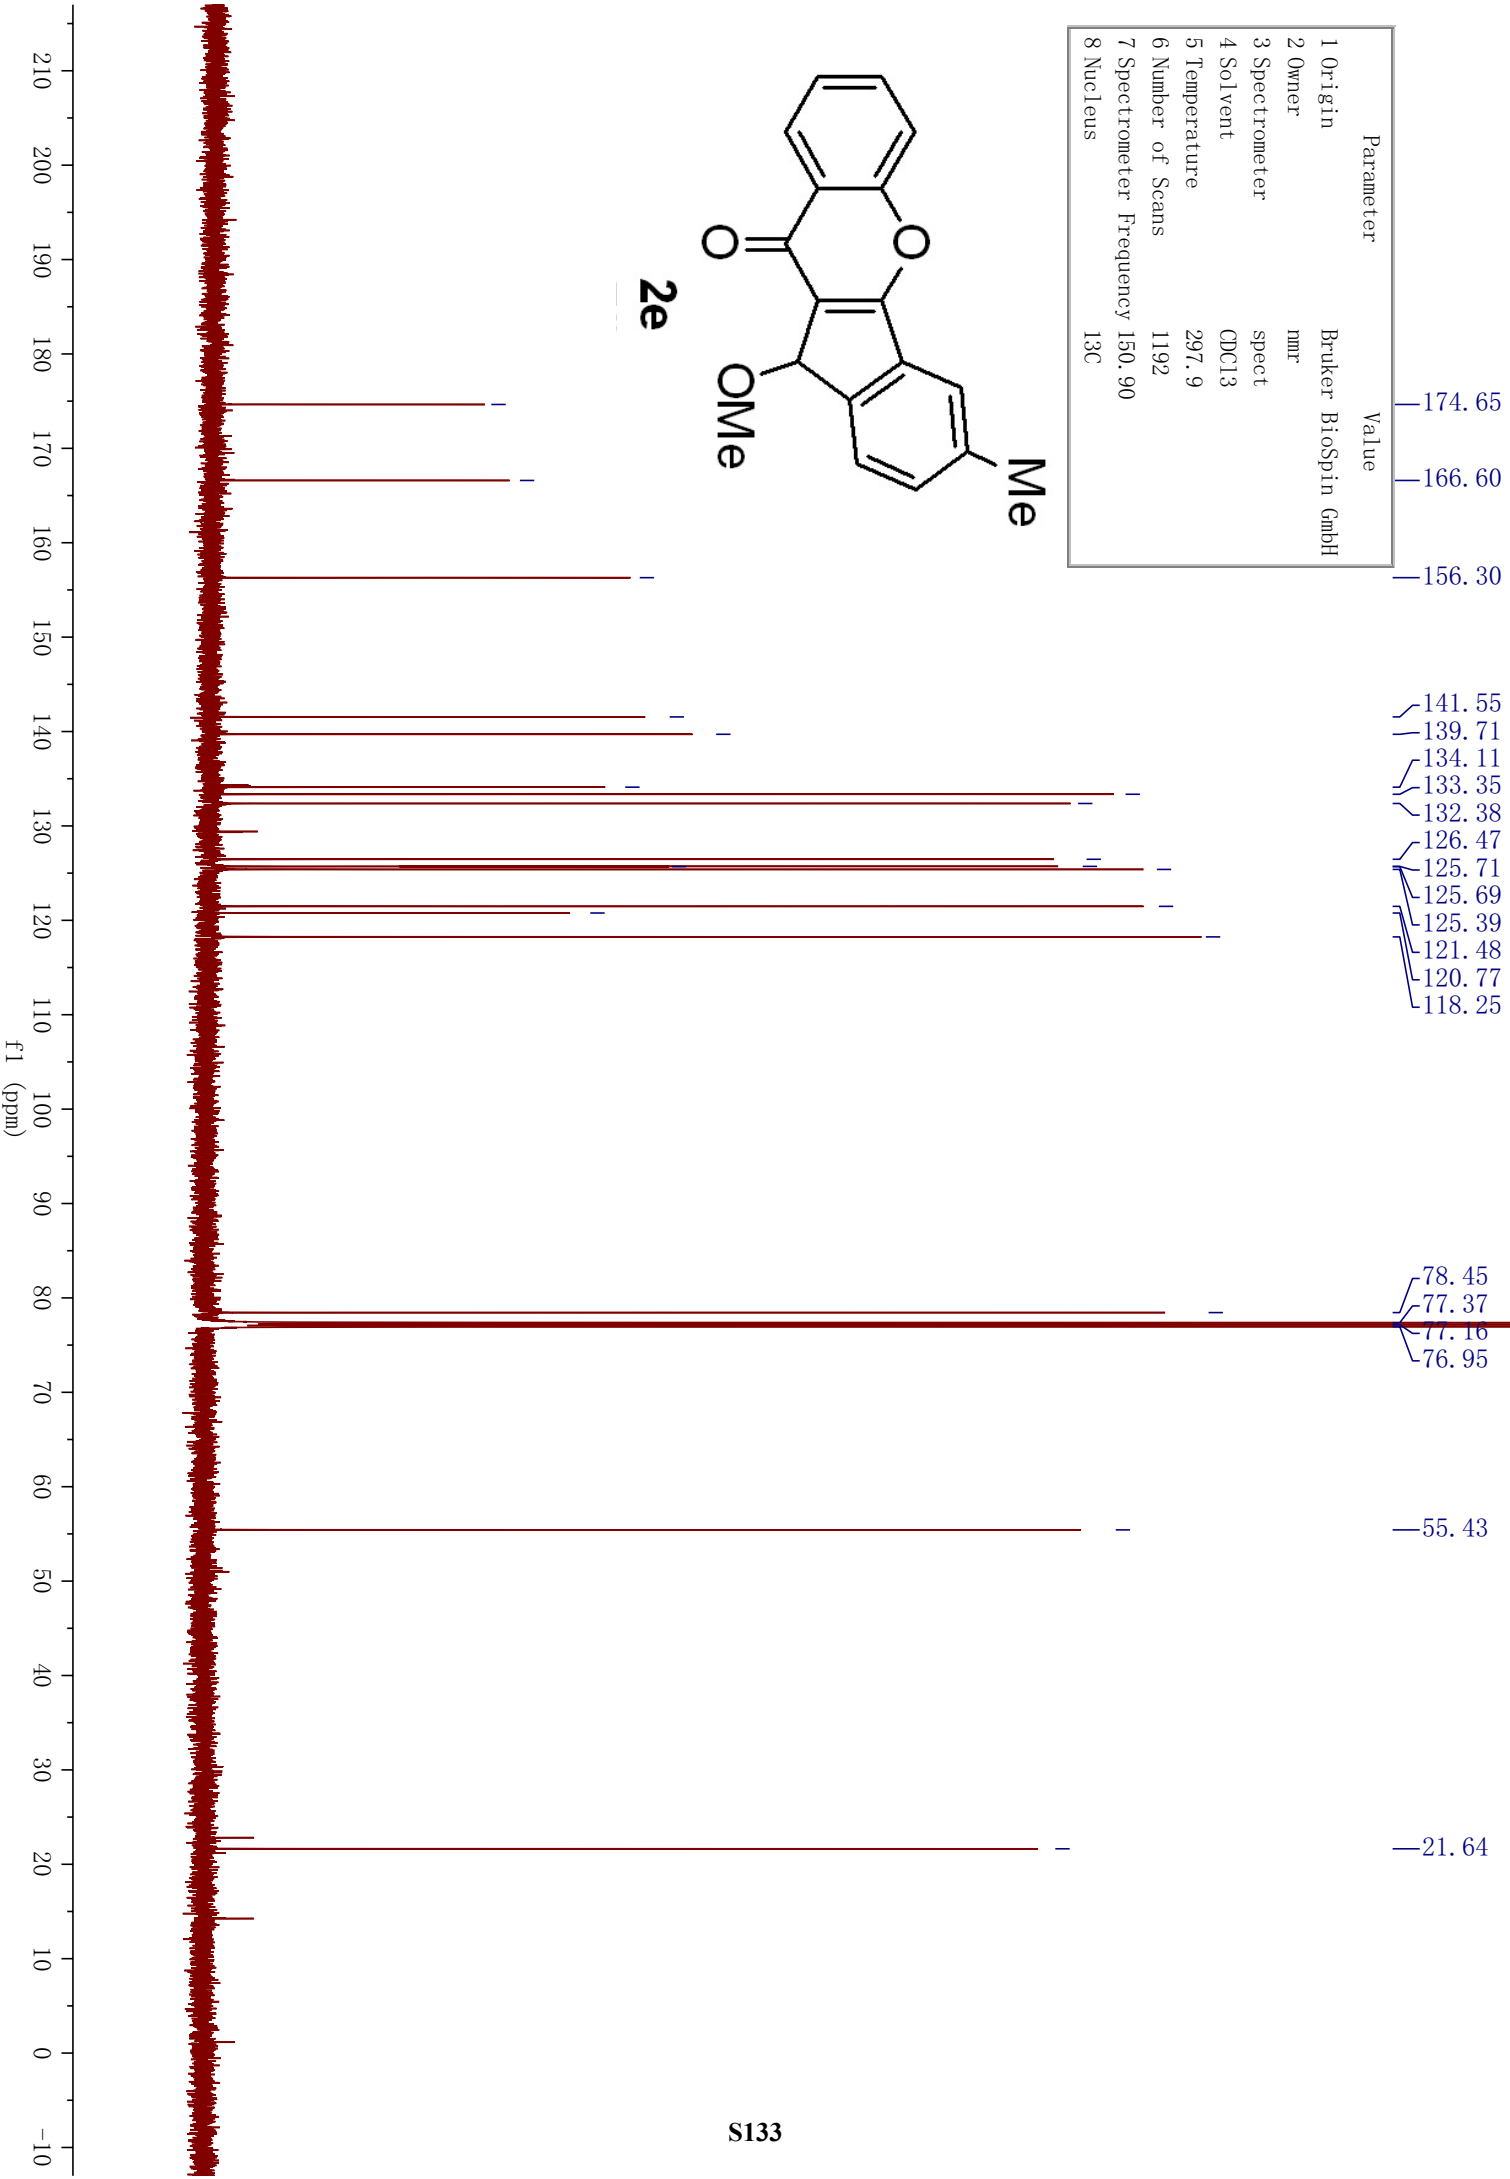

| Parameter                | Value               |
|--------------------------|---------------------|
| 1 Origin                 | Bruker Biospin GmbH |
| 2 Owner                  | nmr                 |
| 3 Spectrometer           | spect               |
| 4 Solvent                | CDCl3               |
| 5 Temperature            | 297.9               |
| 6 Number of Scans        | 16                  |
| 7 Spectrometer Frequency | 600.13              |
| 8 Nucleus                | <sup>1</sup> H      |

- 8.34
- 8.33
- 8.32
- 8.32
- 7.71
- 7.71
- 7.70
- 7.64
- 7.60
- 7.60
- 7.59
- 7.59
- 7.48
- 7.48
- 7.47
- 7.46
- 7.46
- 7.45
- 7.45
- 7.44
- 7.26
- 7.22
- 5.59

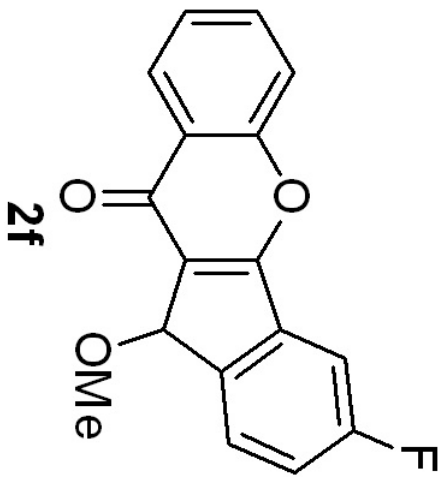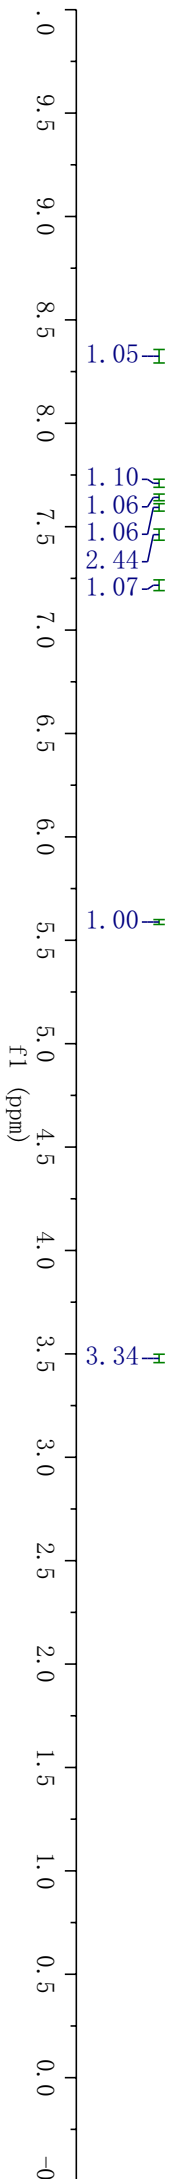

3.48

| Parameter                | Value                |
|--------------------------|----------------------|
| 1 Origin                 | Brucker BioSpin GmbH |
| 2 Owner                  | nmr                  |
| 3 Spectrometer           | spect                |
| 4 Solvent                | CDCl3                |
| 5 Temperature            | 297.9                |
| 6 Number of Scans        | 368                  |
| 7 Spectrometer Frequency | 150.90               |
| 8 Nucleus                | <sup>13</sup> C      |

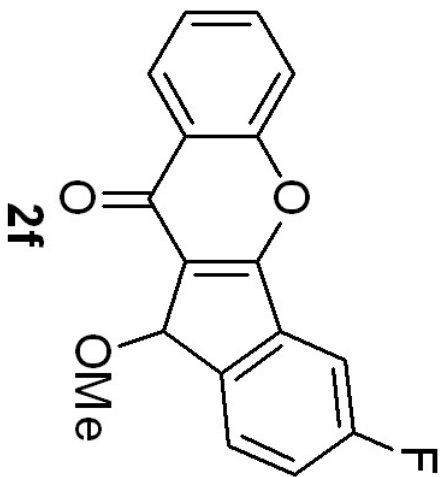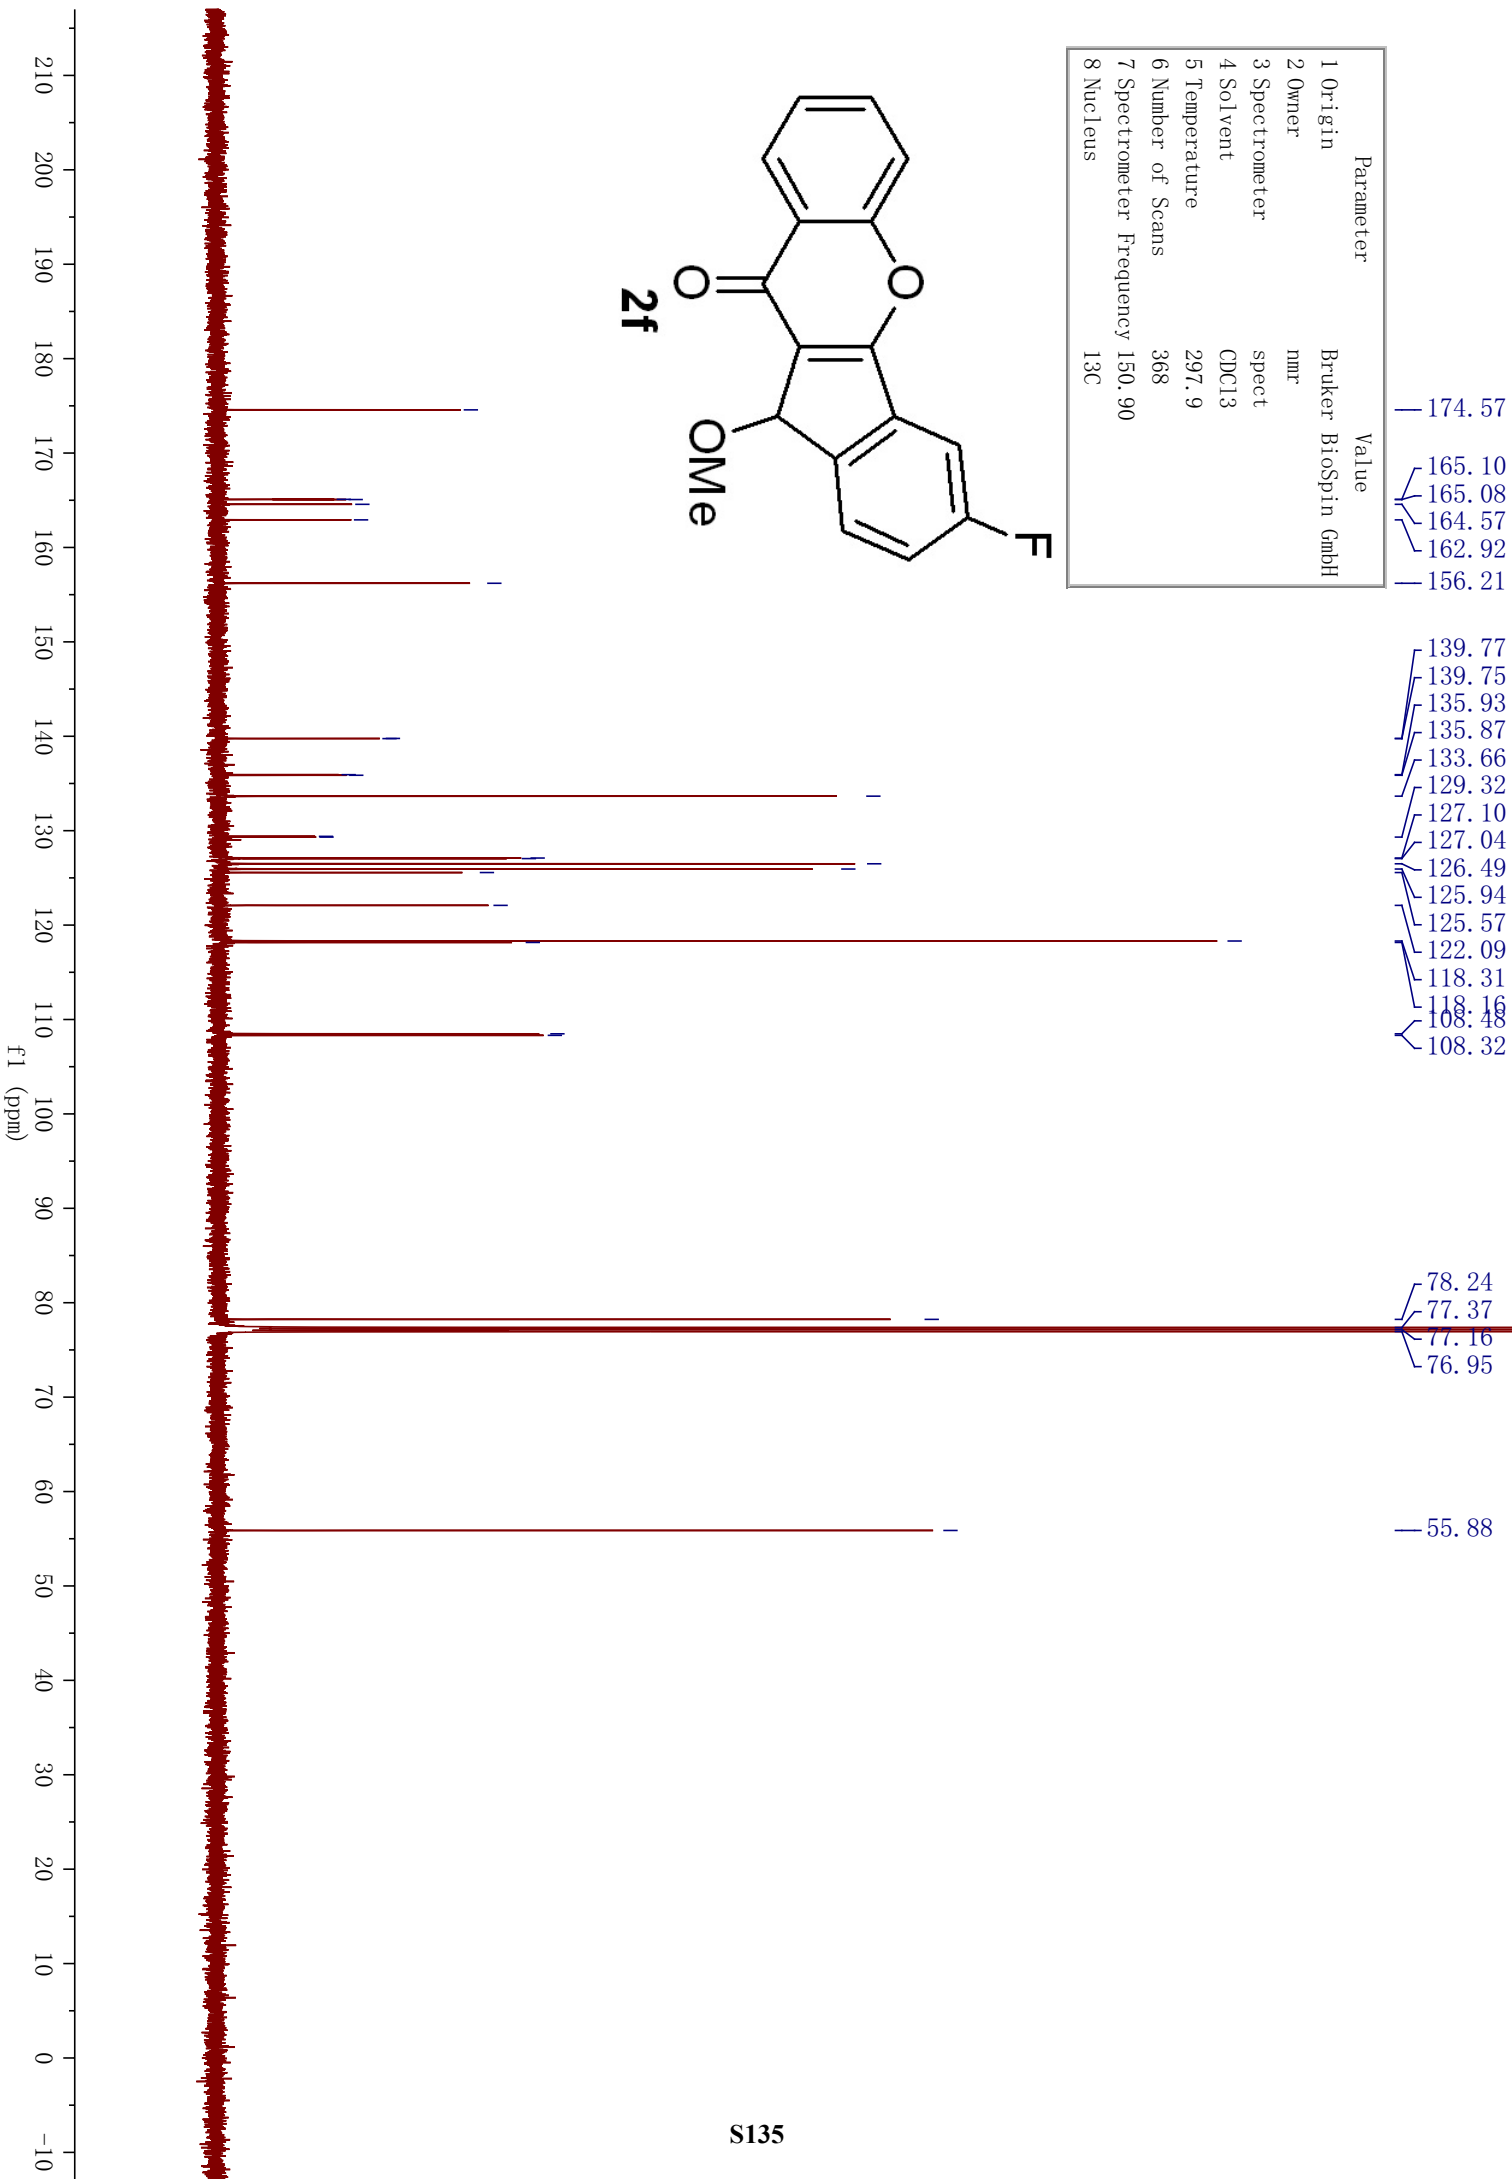

| Parameter                | Value               |
|--------------------------|---------------------|
| 1 Origin                 | Brüker Biospin GmbH |
| 2 Owner                  | nmr                 |
| 3 Spectrometer           | spect               |
| 4 Solvent                | CDCl3               |
| 5 Temperature            | 297.9               |
| 6 Number of Scans        | 16                  |
| 7 Spectrometer Frequency | 600.13              |
| 8 Nucleus                | <sup>1</sup> H      |

- 8.30
- 8.29
- 7.64
- 7.64
- 7.63
- 7.62
- 7.58
- 7.57
- 7.56
- 7.54
- 7.38
- 7.36
- 7.26

5.60

3.44

2.48

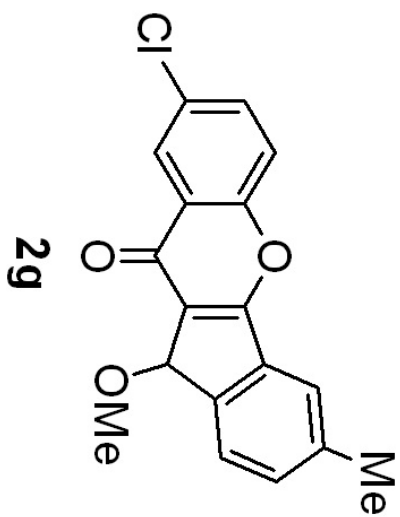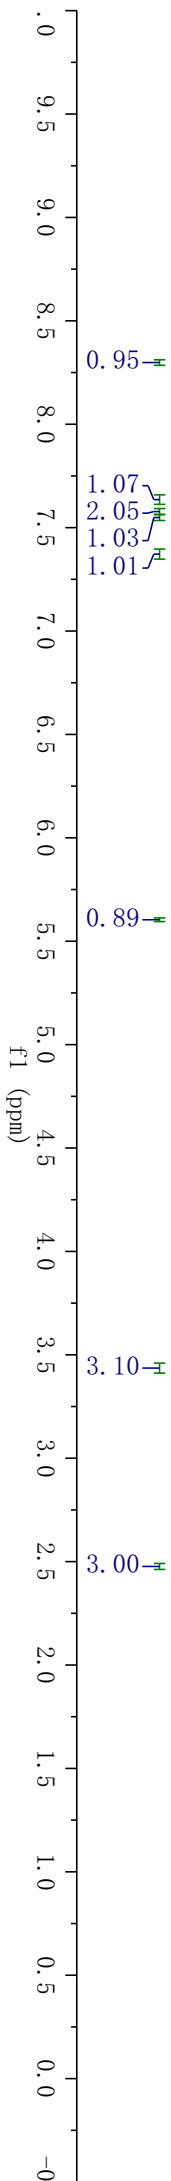

| Parameter                | Value               |
|--------------------------|---------------------|
| 1 Origin                 | Brüker Biospin GmbH |
| 2 Owner                  | nmr                 |
| 3 Spectrometer           | spect               |
| 4 Solvent                | CDCl3               |
| 5 Temperature            | 298.0               |
| 6 Number of Scans        | 3369                |
| 7 Spectrometer Frequency | 150.90              |
| 8 Nucleus                | <sup>13</sup> C     |

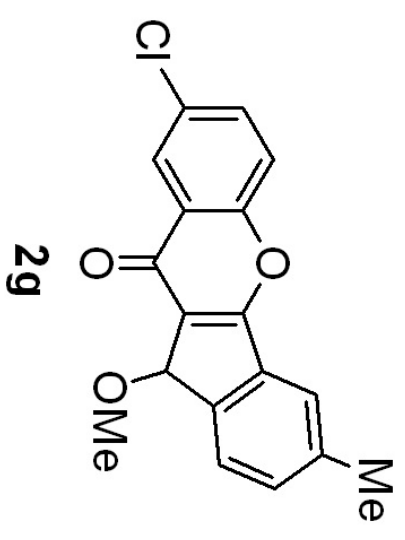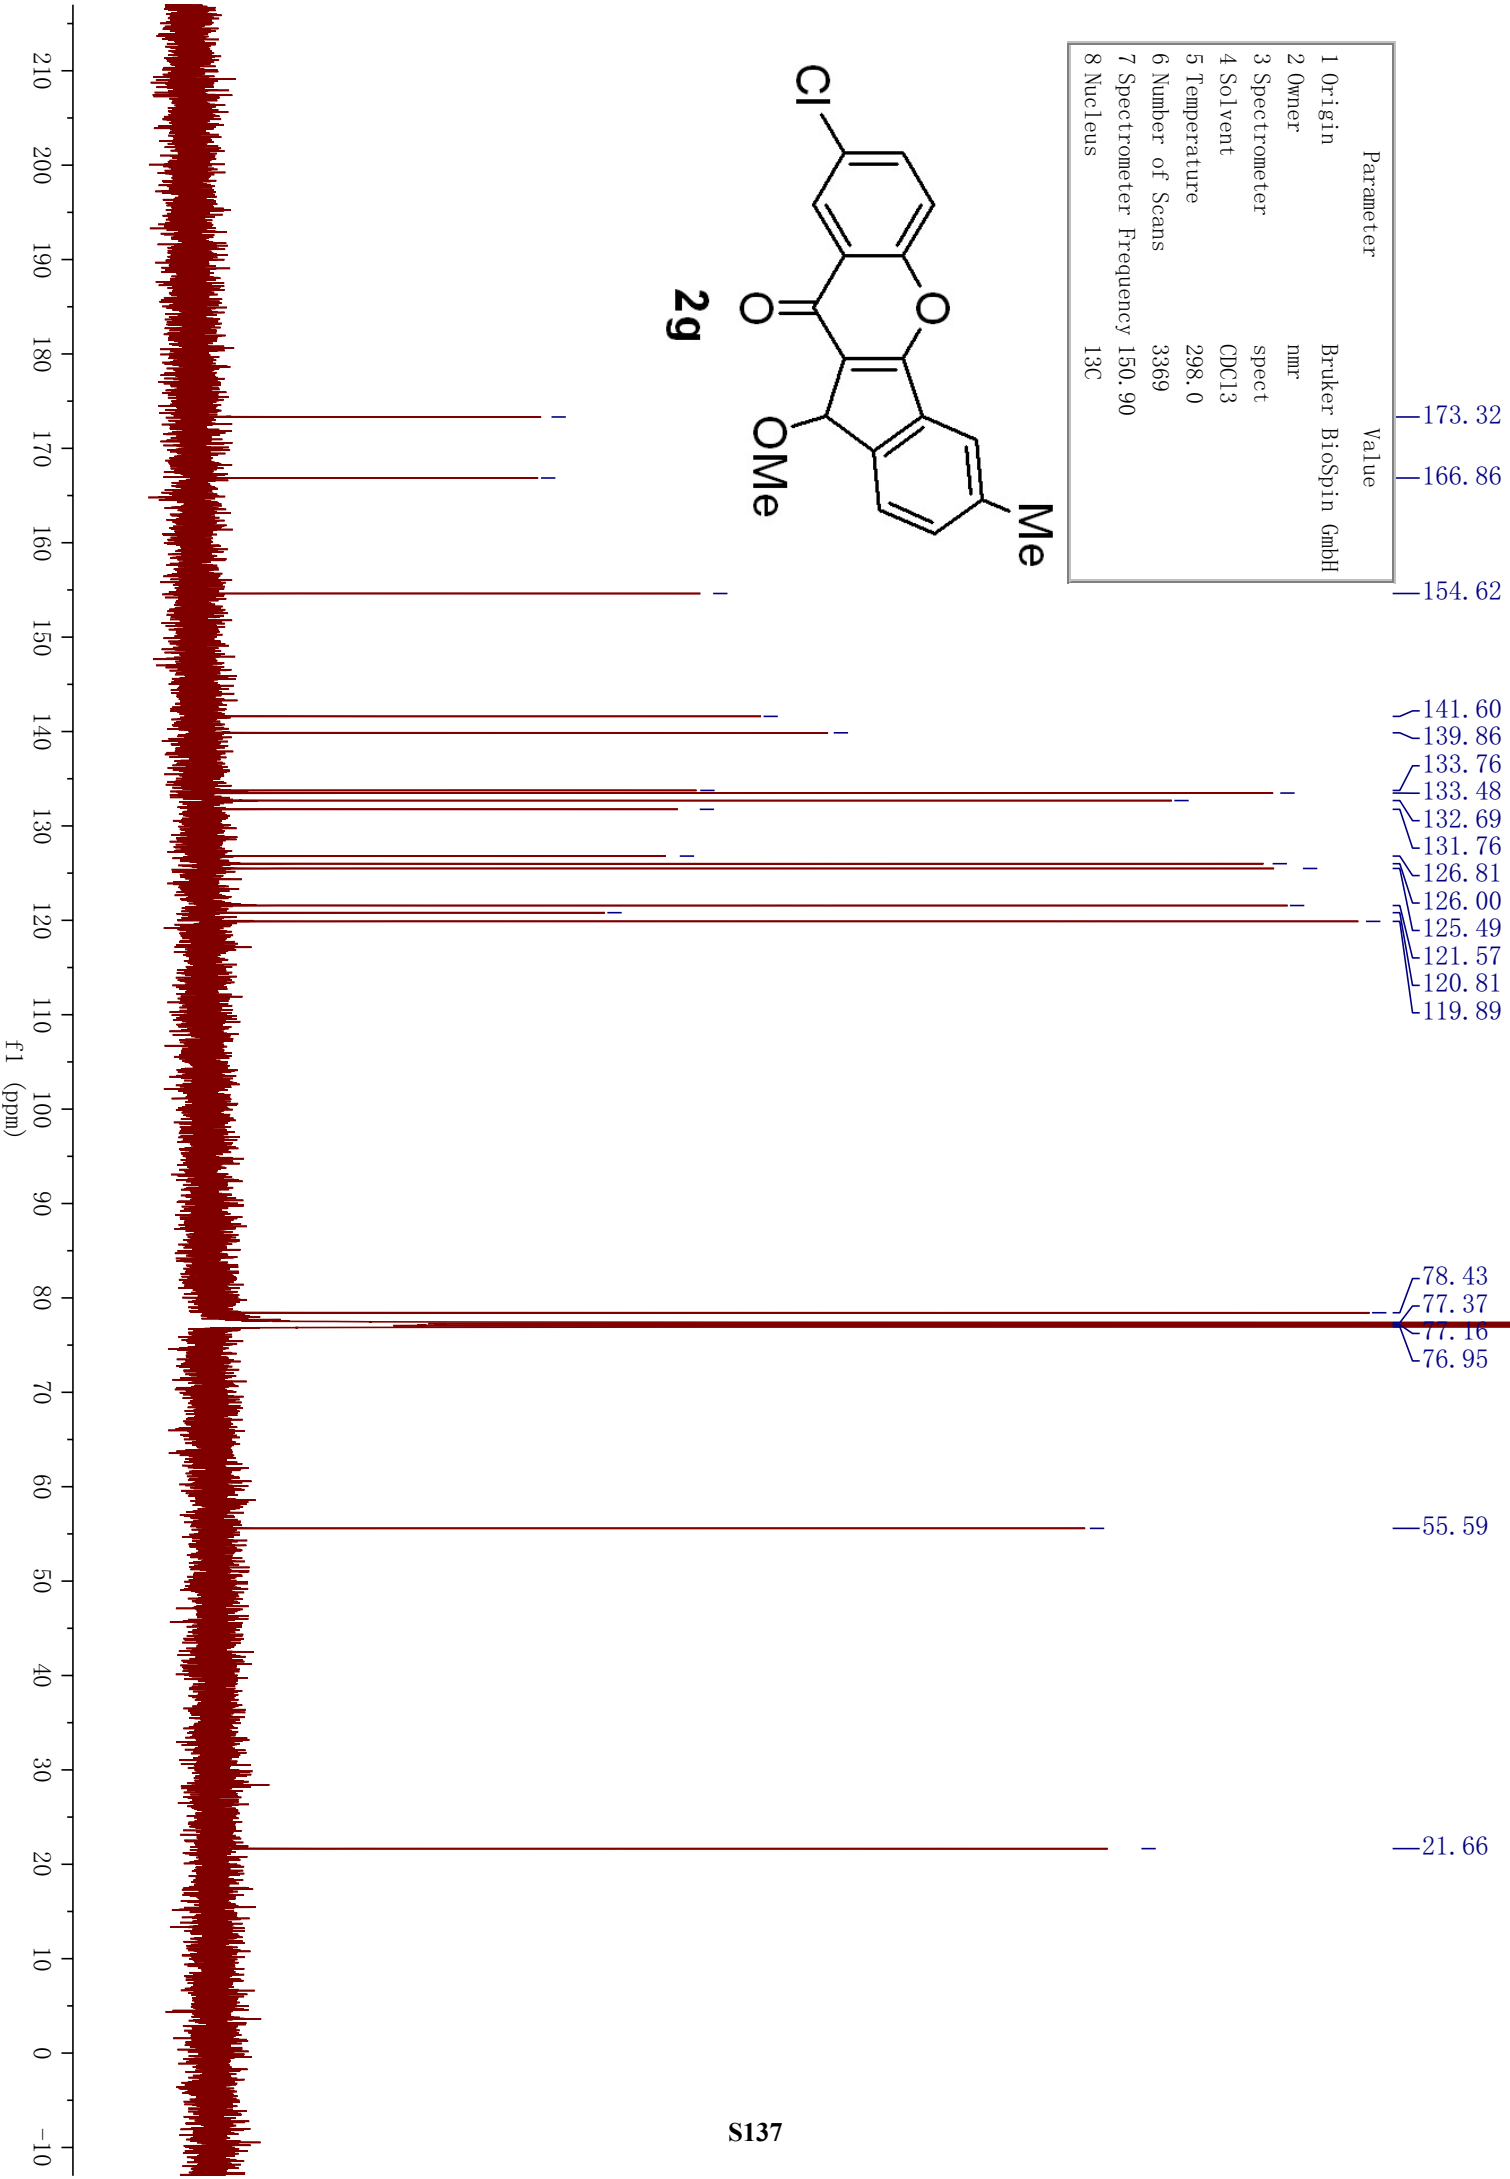

| Parameter                | Value               |
|--------------------------|---------------------|
| 1 Origin                 | Bruker Biospin GmbH |
| 2 Owner                  | nmr                 |
| 3 Spectrometer           | spect               |
| 4 Solvent                | CDCl3               |
| 5 Temperature            | 297.9               |
| 6 Number of Scans        | 16                  |
| 7 Spectrometer Frequency | 600.13              |
| 8 Nucleus                | <sup>1</sup> H      |

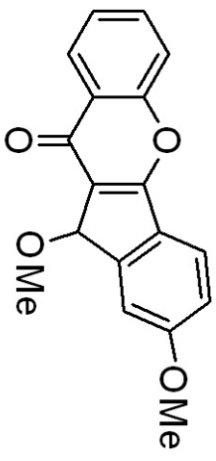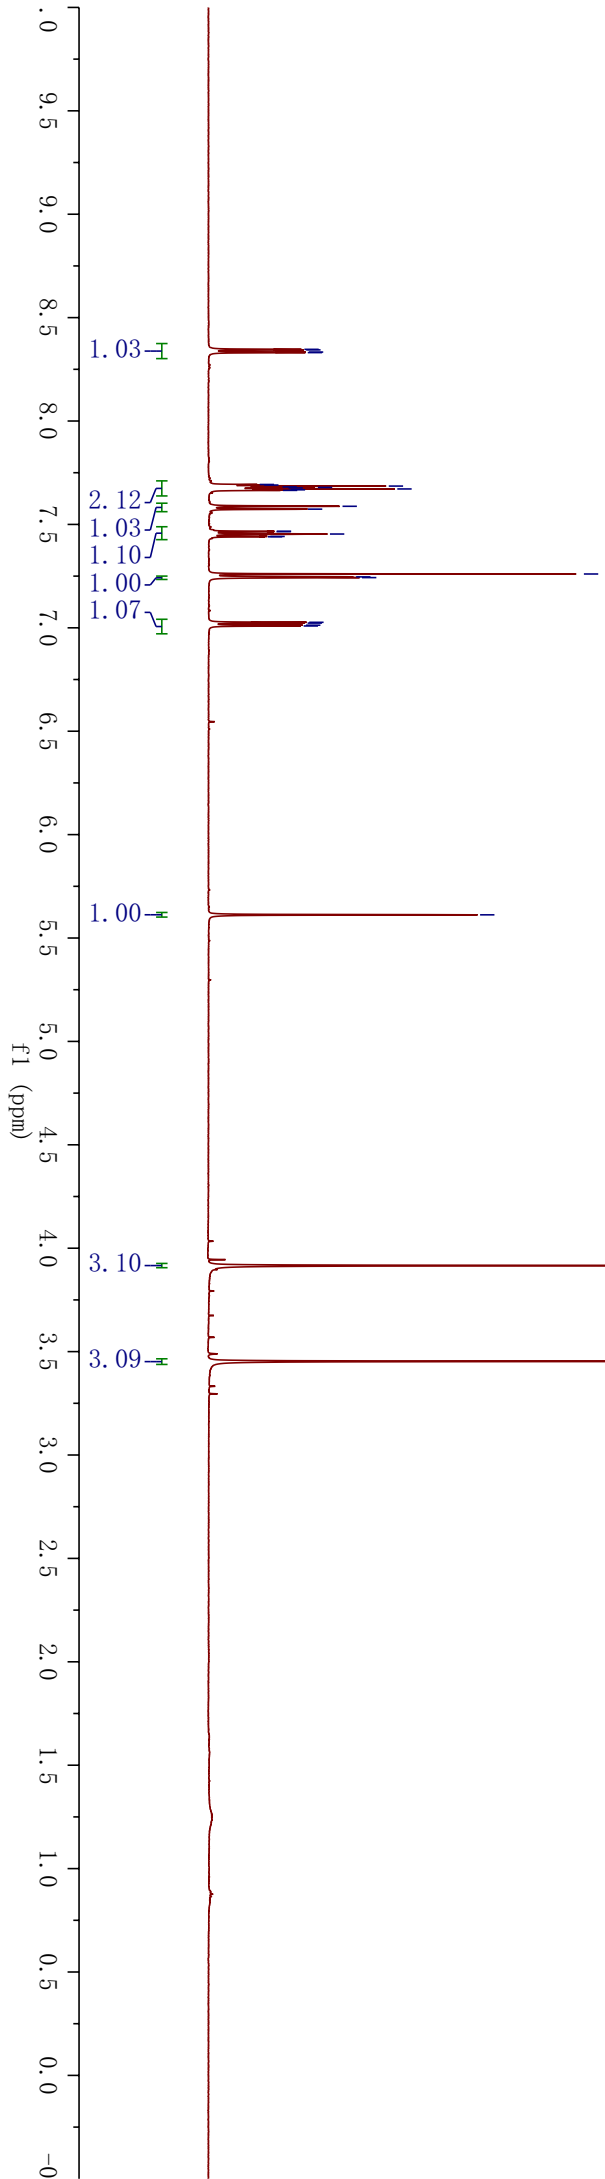

| Parameter                | Value                |
|--------------------------|----------------------|
| 1 Origin                 | Brucker BioSpin GmbH |
| 2 Owner                  | nmr                  |
| 3 Spectrometer           | spect                |
| 4 Solvent                | CDCl3                |
| 5 Temperature            | 297.9                |
| 6 Number of Scans        | 923                  |
| 7 Spectrometer Frequency | 150.90               |
| 8 Nucleus                | <sup>13</sup> C      |

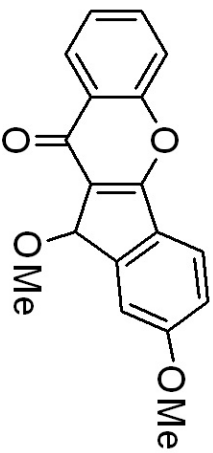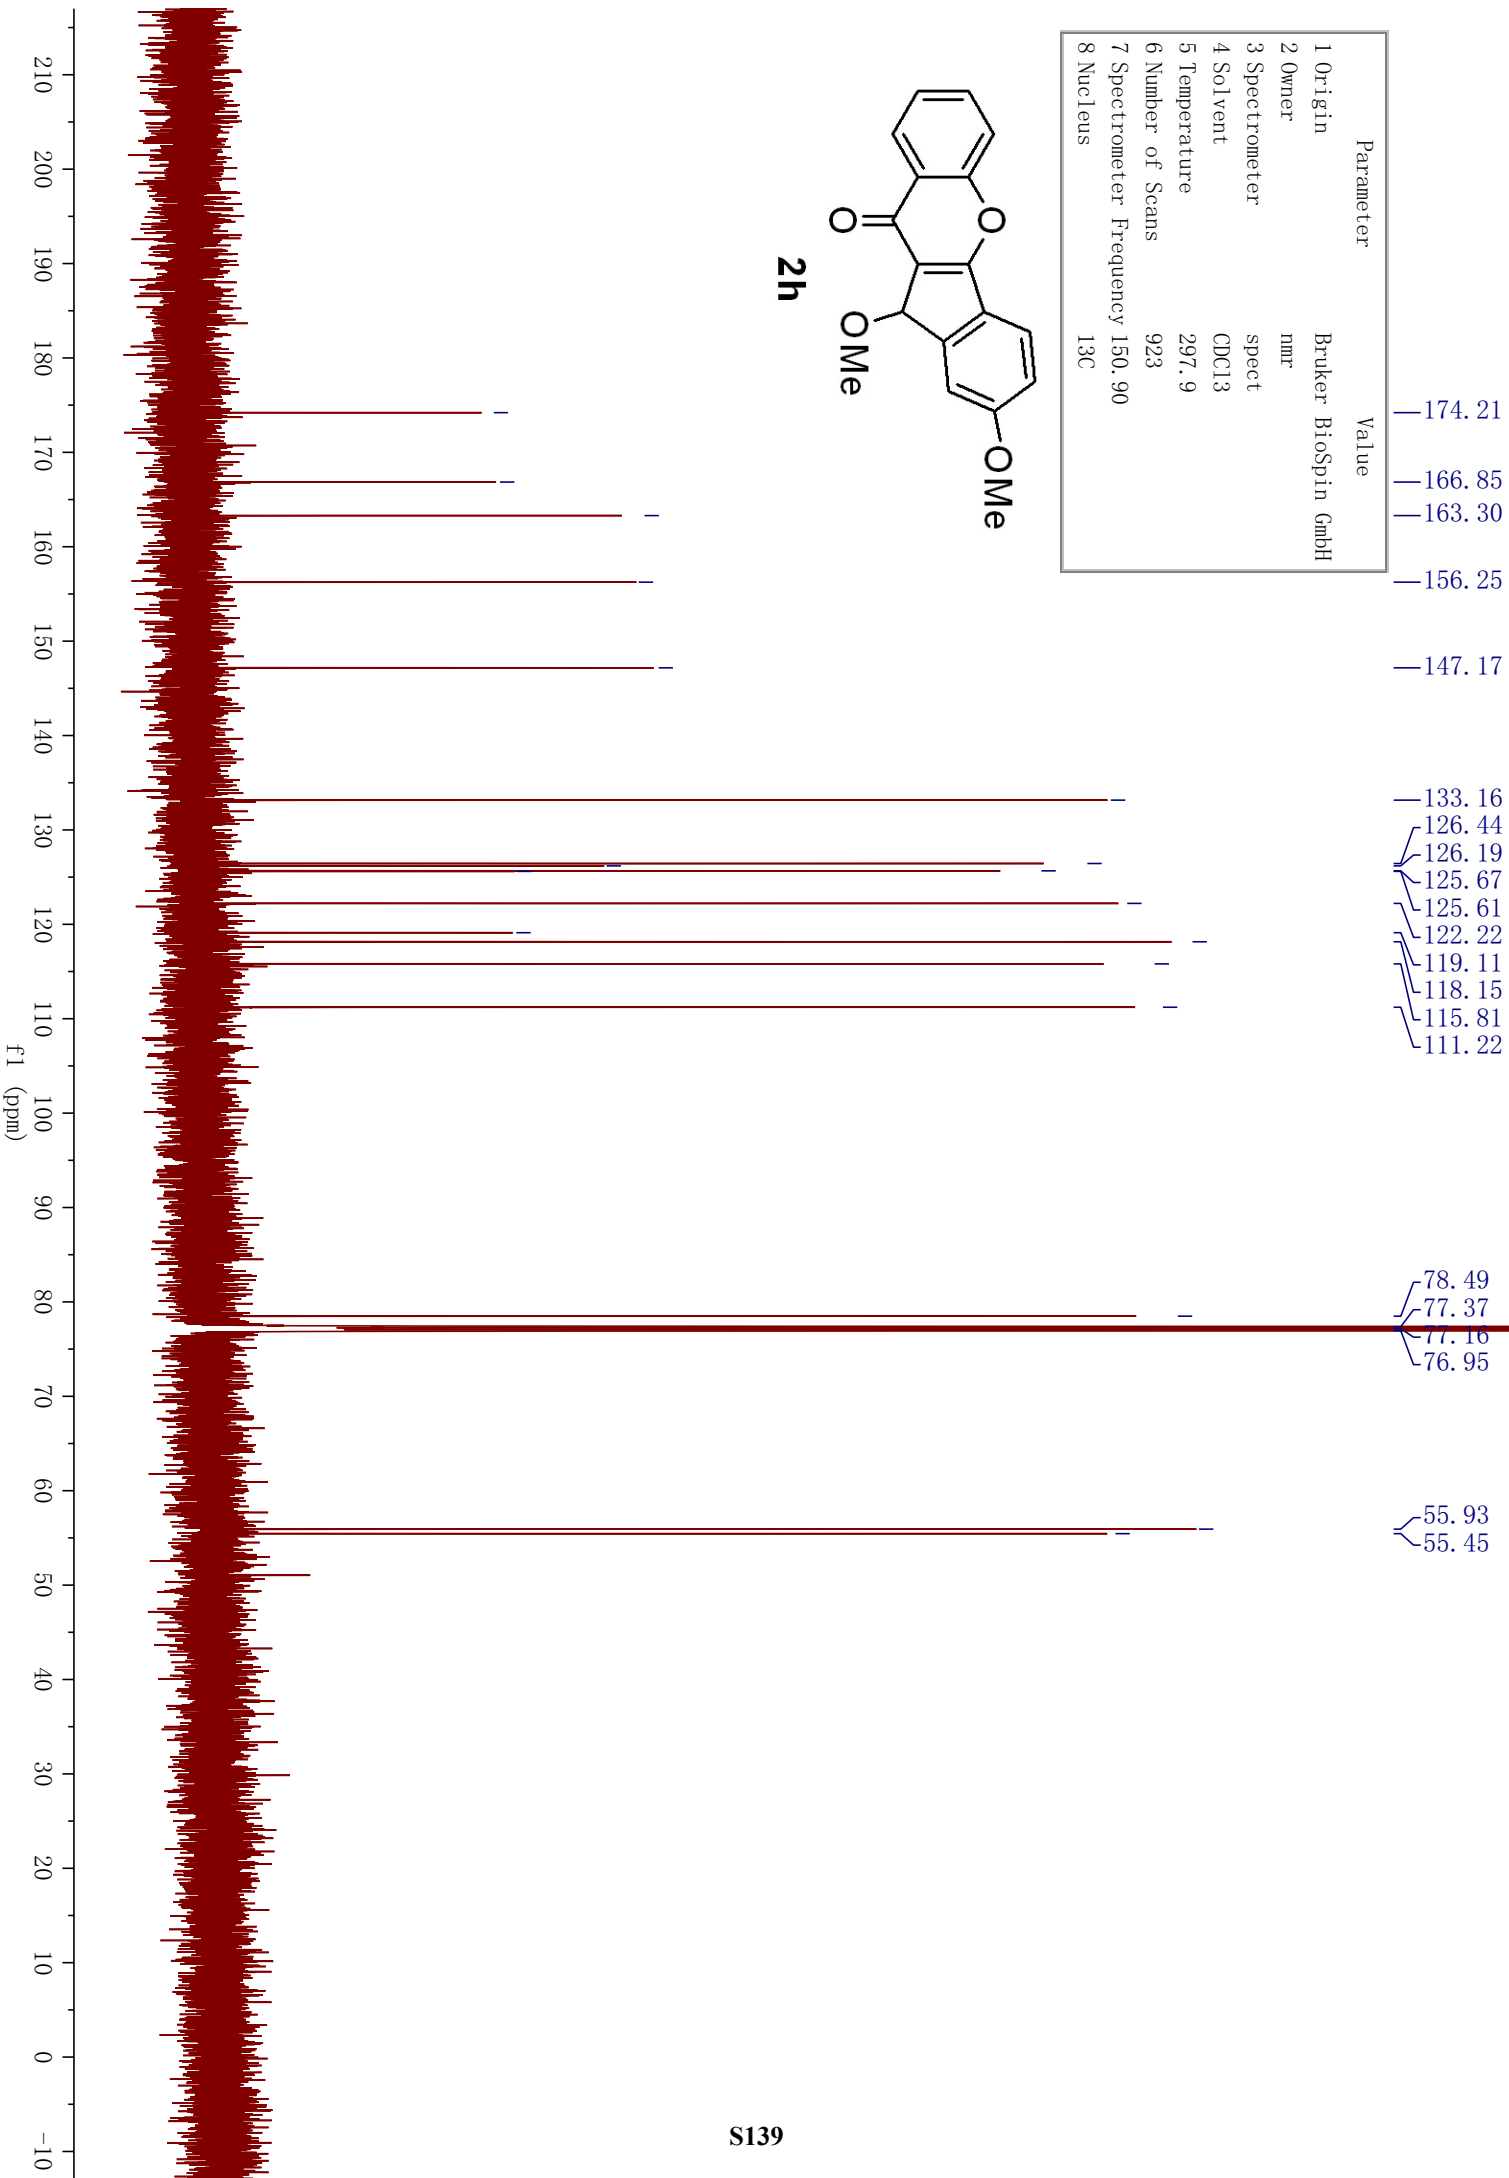



- 8.35
- 8.35
- 8.34
- 8.33
- 7.73
- 7.72
- 7.71
- 7.71
- 7.69
- 7.69
- 7.61
- 7.59
- 7.51
- 7.50
- 7.49
- 7.48
- 7.47
- 7.26

| Parameter                | Value                |
|--------------------------|----------------------|
| 1 Origin                 | Brucker BioSpin GmbH |
| 2 Owner                  | nmr                  |
| 3 Spectrometer           | spect                |
| 4 Solvent                | CDCl3                |
| 5 Temperature            | 297.9                |
| 6 Number of Scans        | 16                   |
| 7 Spectrometer Frequency | 600.13               |
| 8 Nucleus                | <sup>1</sup> H       |

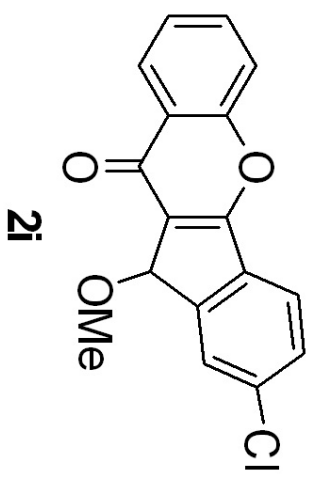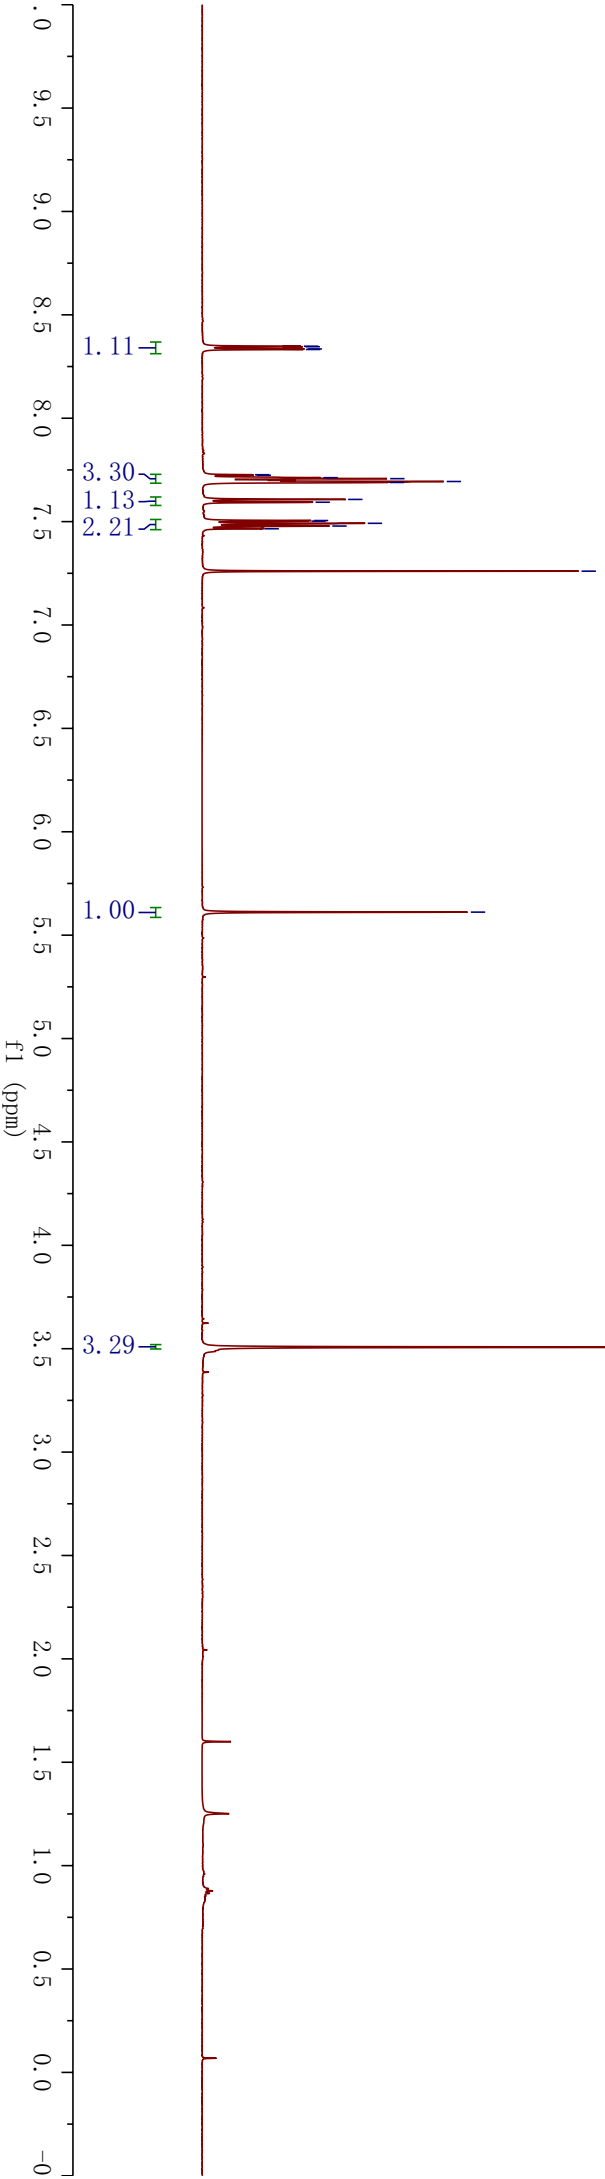

| Parameter                | Value               |
|--------------------------|---------------------|
| 1 Origin                 | Bruker Biospin GmbH |
| 2 Owner                  | nmr                 |
| 3 Spectrometer           | spect               |
| 4 Solvent                | CDCl3               |
| 5 Temperature            | 297.9               |
| 6 Number of Scans        | 1020                |
| 7 Spectrometer Frequency | 150.90              |
| 8 Nucleus                | <sup>13</sup> C     |

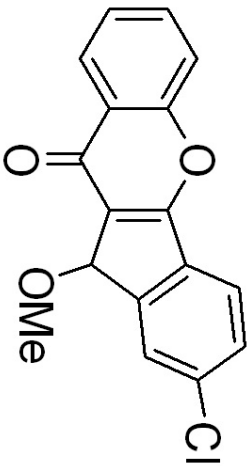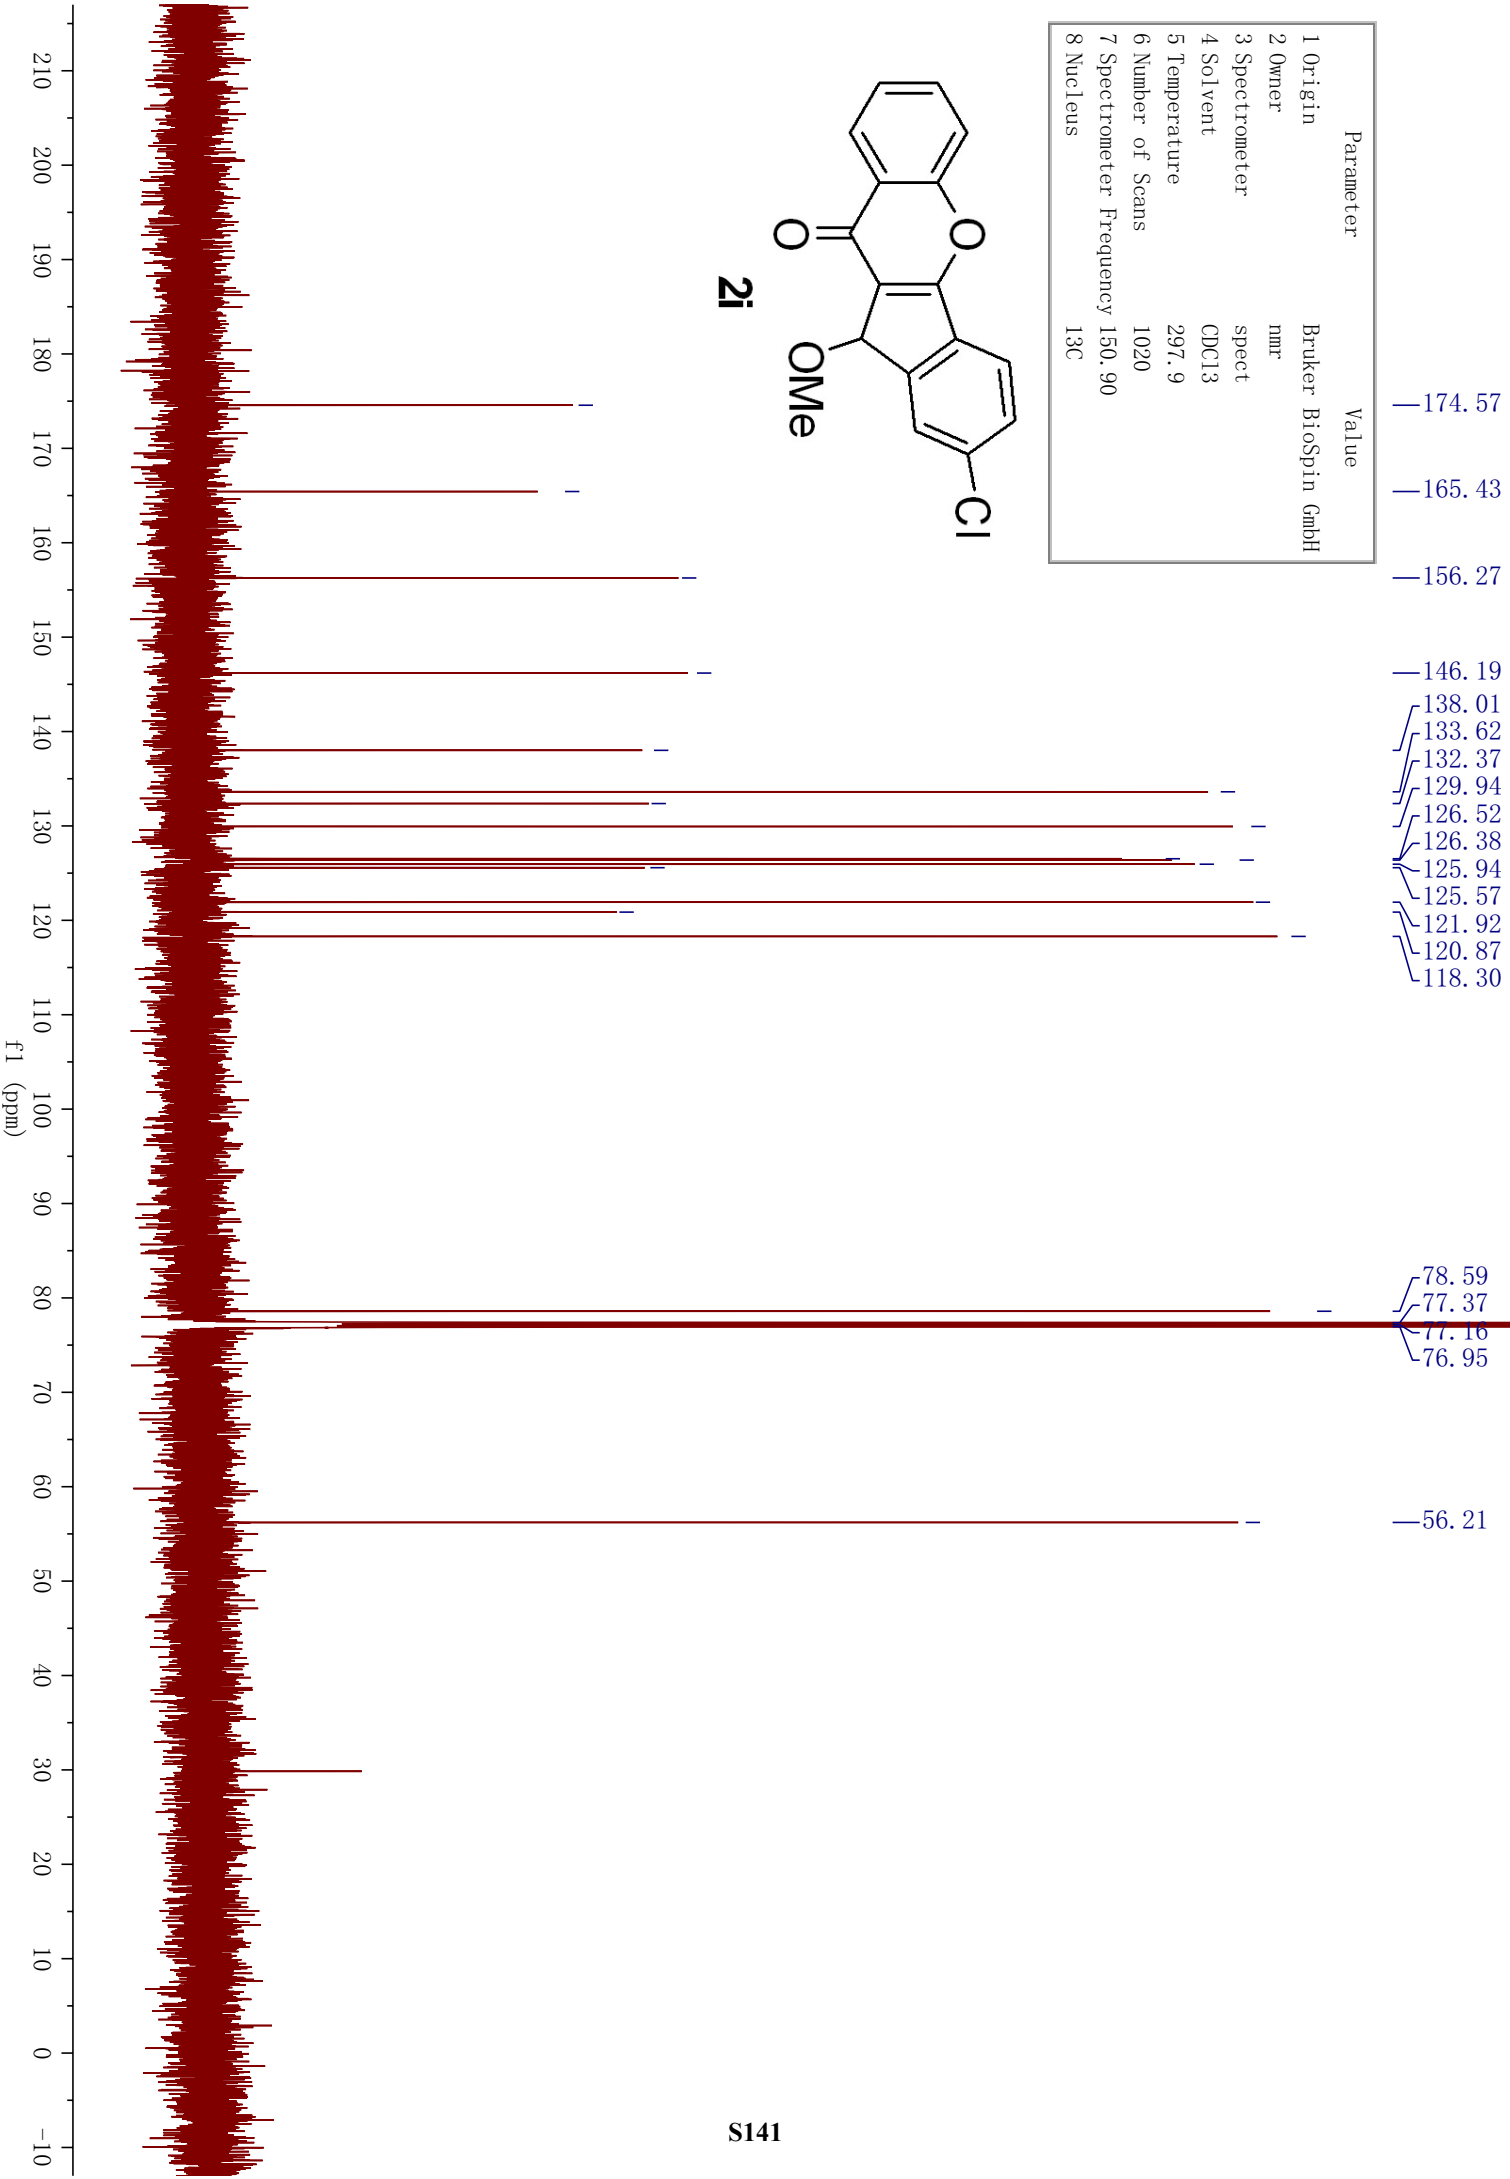

| Parameter                | Value                |
|--------------------------|----------------------|
| 1 Origin                 | Brucker BioSpin GmbH |
| 2 Owner                  | nmr                  |
| 3 Spectrometer           | spect                |
| 4 Solvent                | CDCl3                |
| 5 Temperature            | 297.9                |
| 6 Number of Scans        | 16                   |
| 7 Spectrometer Frequency | 600.13               |
| 8 Nucleus                | <sup>1</sup> H       |

- 8.35
- 8.35
- 8.34
- 8.33
- 7.76
- 7.75
- 7.74
- 7.74
- 7.71
- 7.70
- 7.70
- 7.70
- 7.61
- 7.59
- 7.49
- 7.48
- 7.42
- 7.42
- 7.41
- 7.41
- 7.26
- 7.21
- 7.21
- 5.61

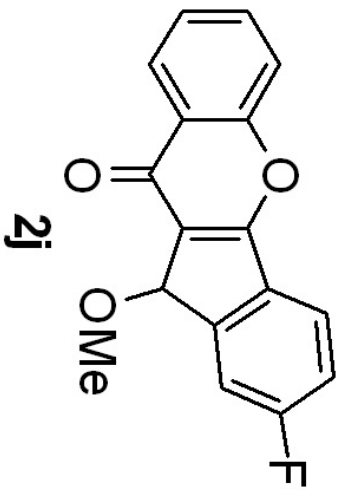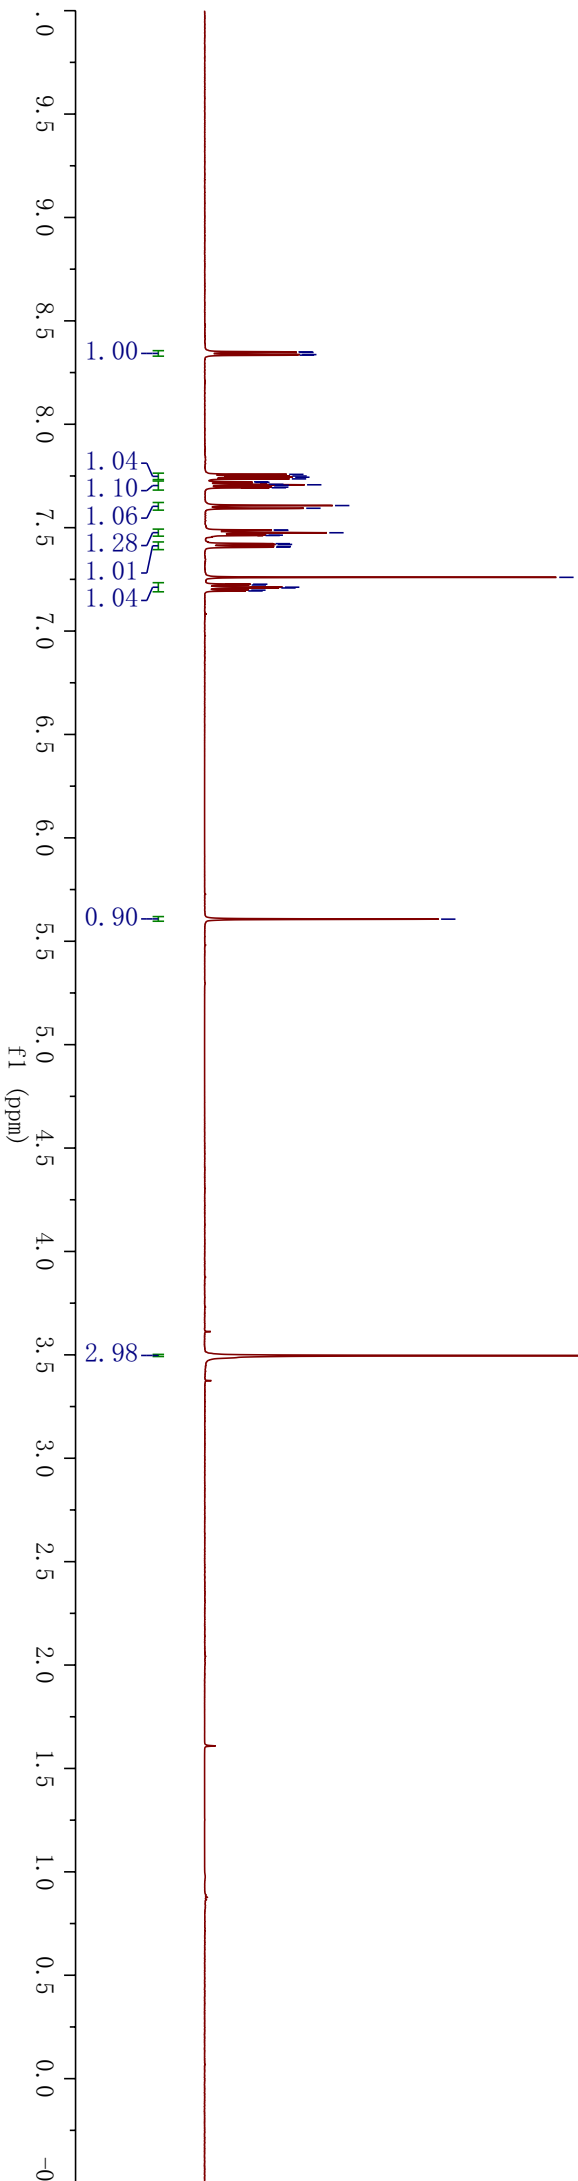

| Parameter                | Value                |
|--------------------------|----------------------|
| 1 Origin                 | Brucker Biospin GmbH |
| 2 Owner                  | nmr                  |
| 3 Spectrometer           | spect                |
| 4 Solvent                | CDCl3                |
| 5 Temperature            | 298.0                |
| 6 Number of Scans        | 4534                 |
| 7 Spectrometer Frequency | 150.90               |
| 8 Nucleus                | <sup>13</sup> C      |

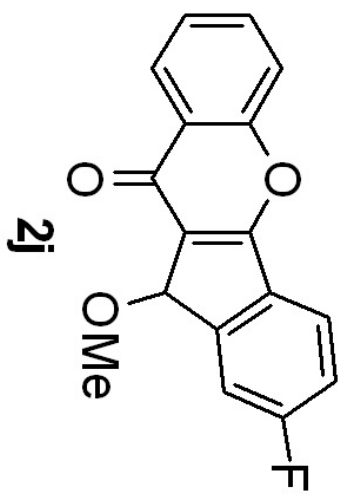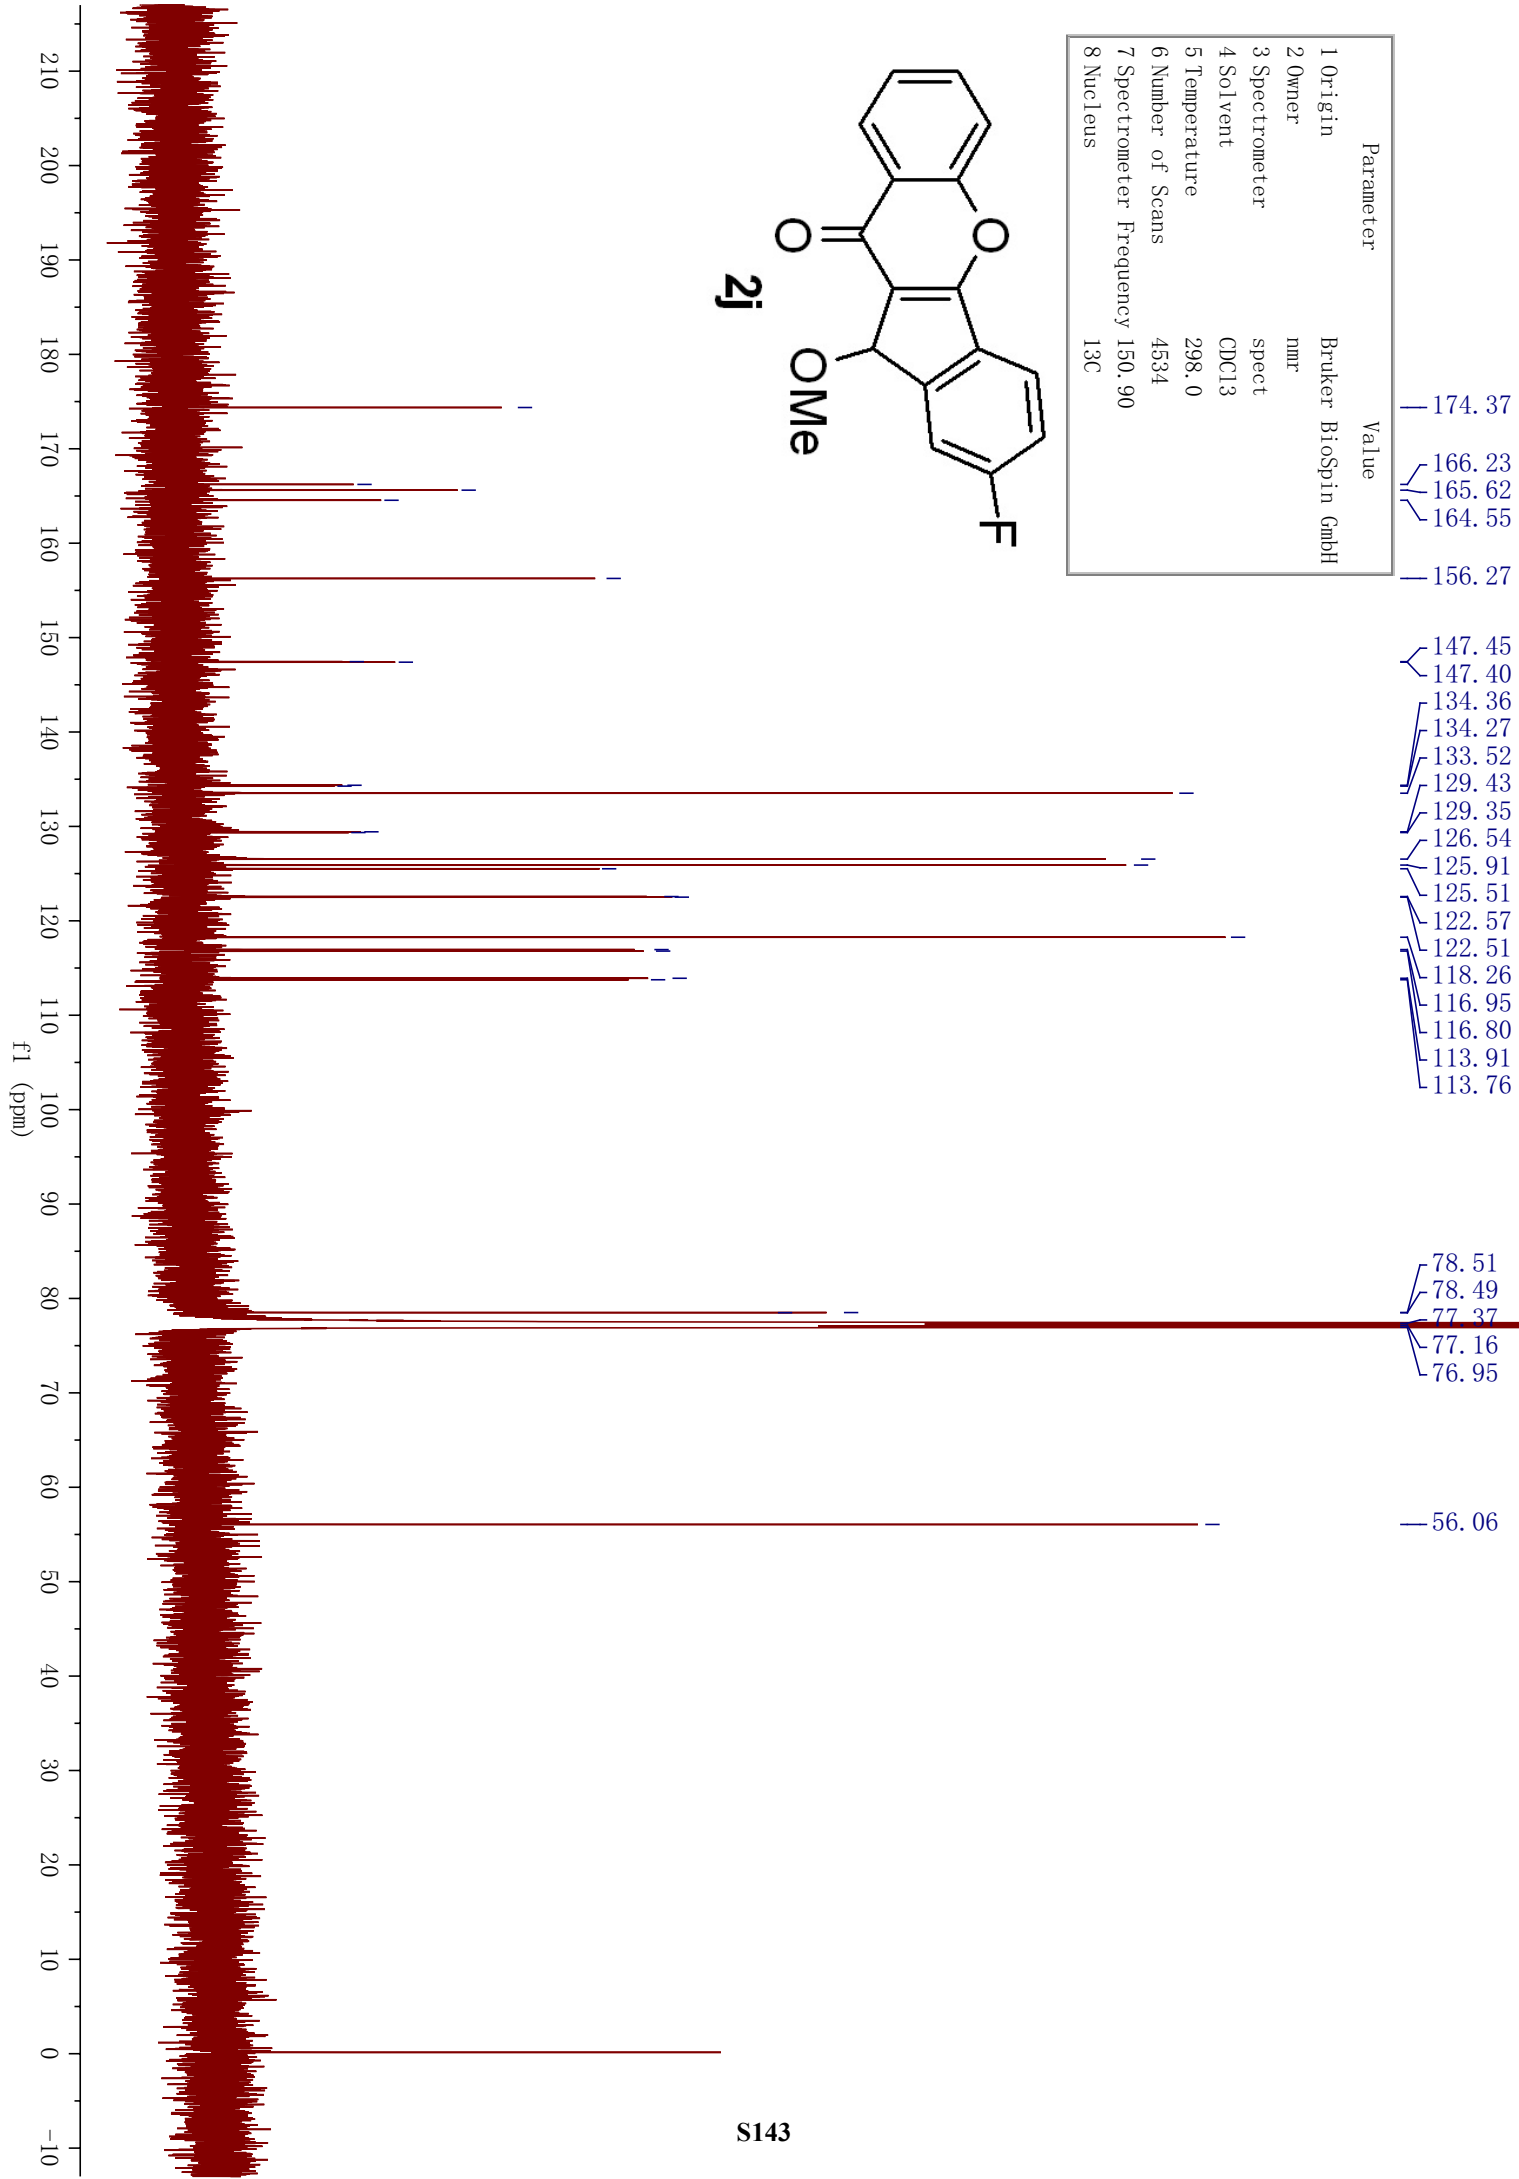

| Parameter                | Value                |
|--------------------------|----------------------|
| 1 Origin                 | Brucker Biospin GmbH |
| 2 Owner                  | nmr                  |
| 3 Spectrometer           | spect                |
| 4 Solvent                | CDCl3                |
| 5 Temperature            | 297.9                |
| 6 Number of Scans        | 16                   |
| 7 Spectrometer Frequency | 600.13               |
| 8 Nucleus                | <sup>1</sup> H       |

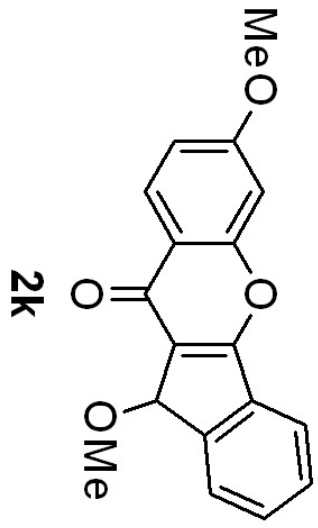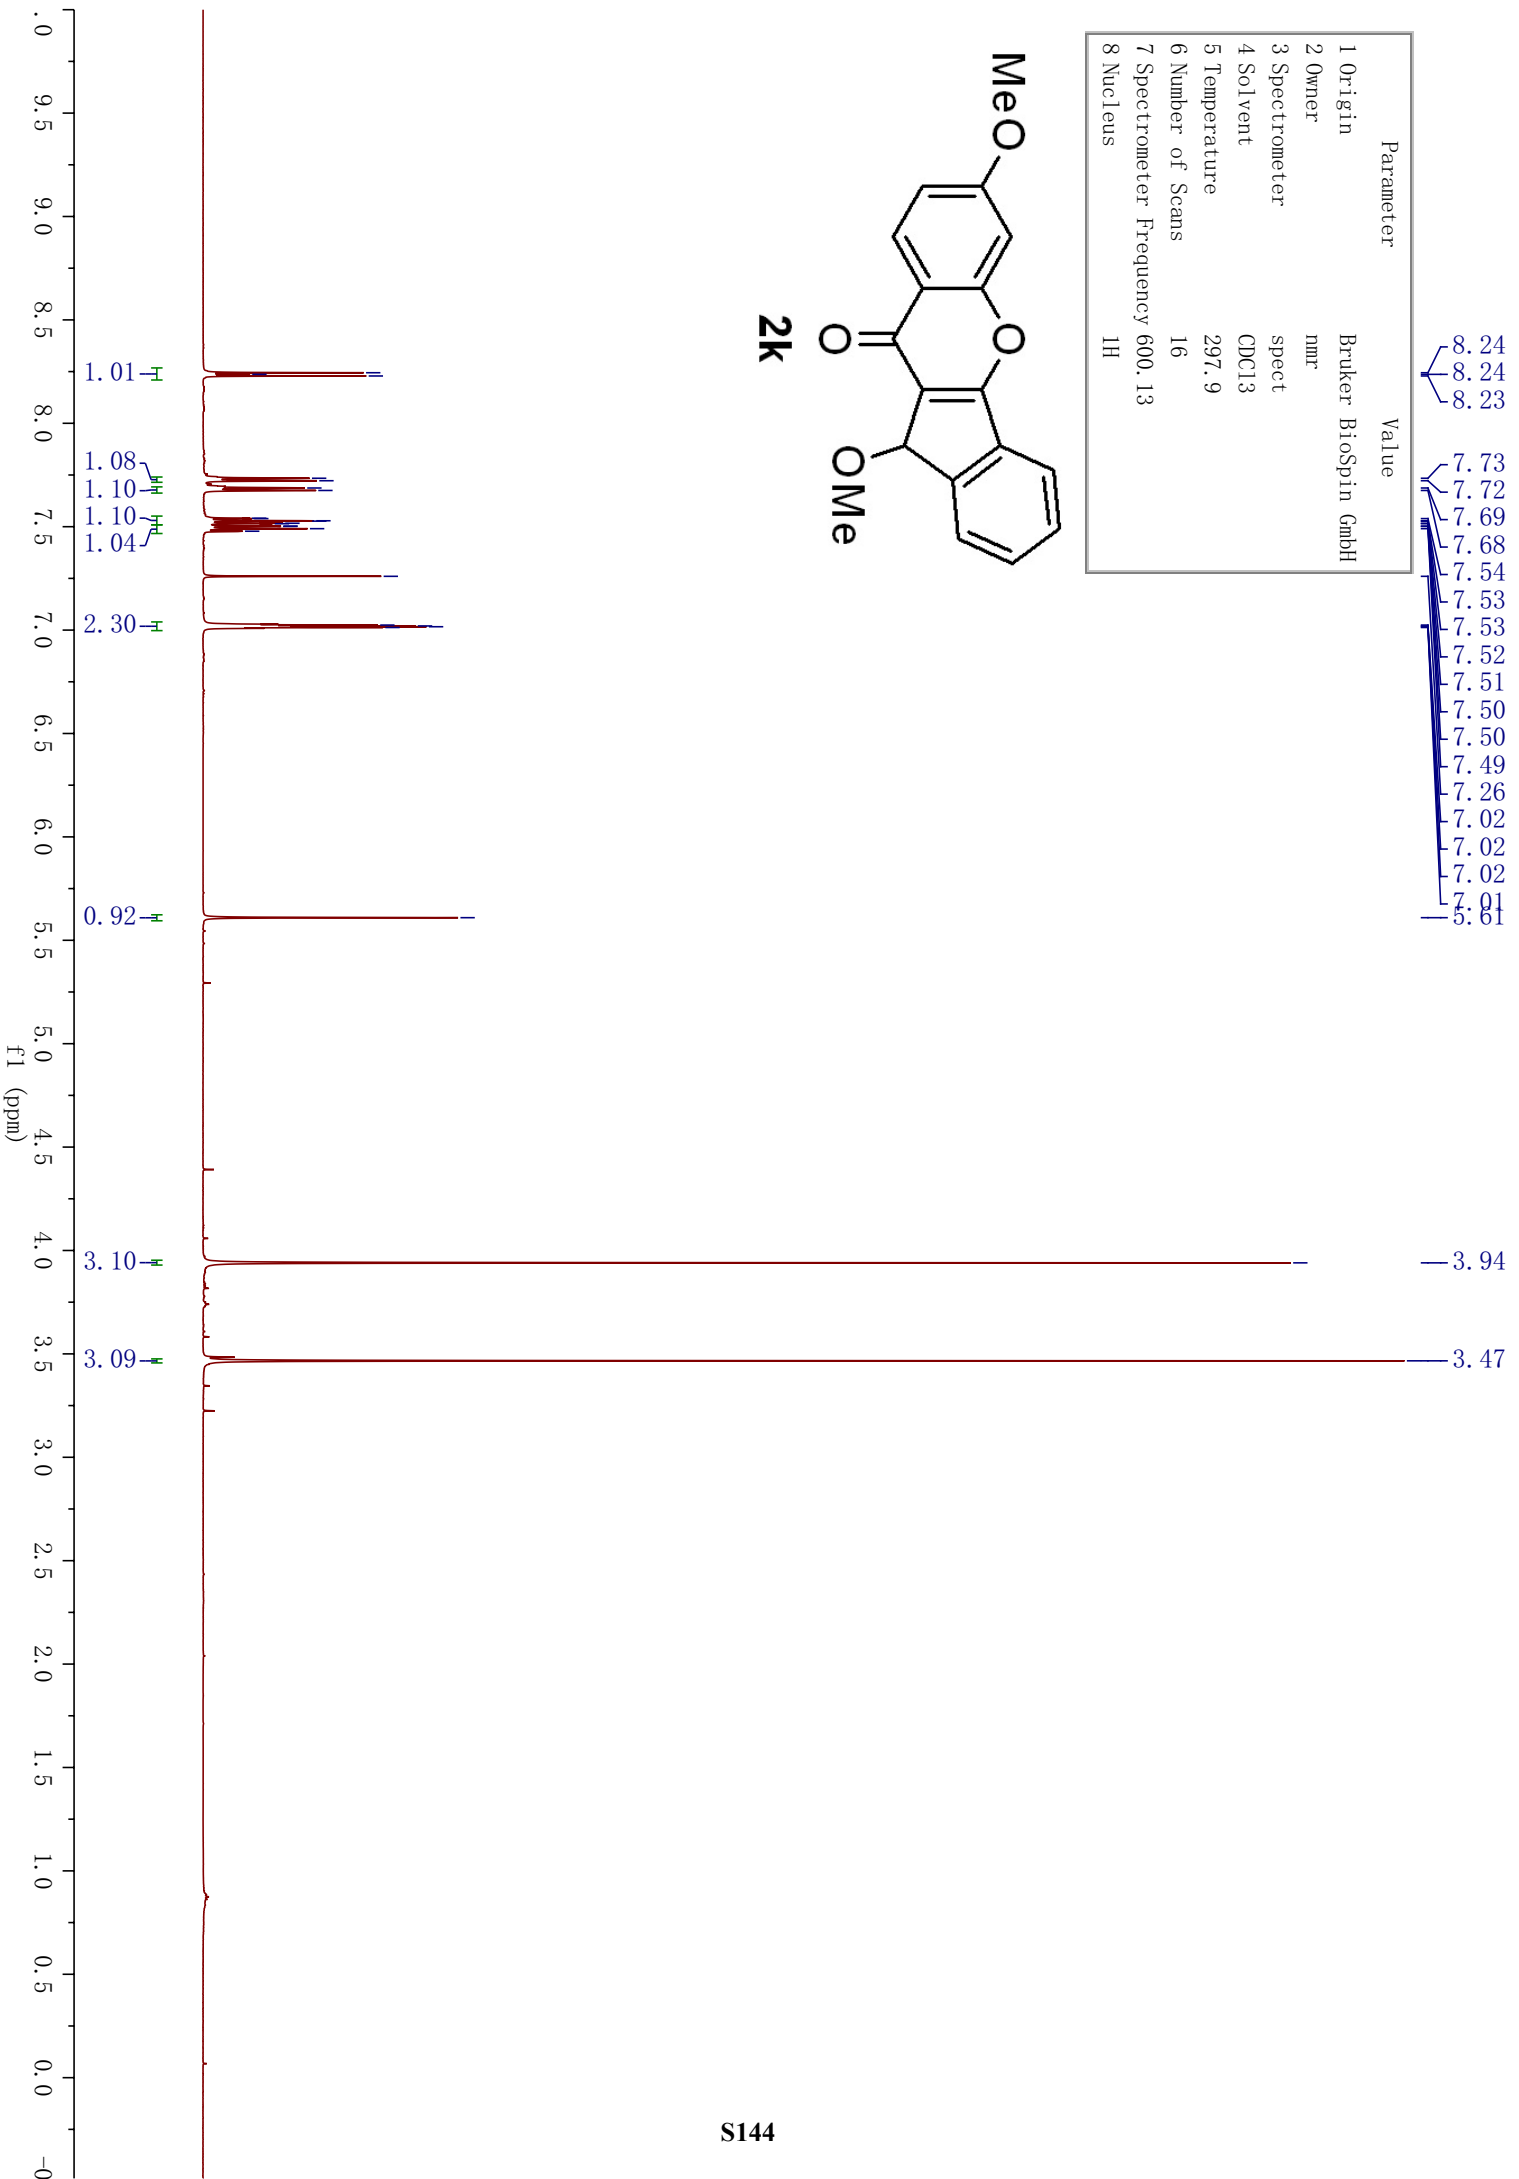

| Parameter                | Value                |
|--------------------------|----------------------|
| 1 Origin                 | Brucker Biospin GmbH |
| 2 Owner                  | nmr                  |
| 3 Spectrometer           | spect                |
| 4 Solvent                | CDCl3                |
| 5 Temperature            | 297.9                |
| 6 Number of Scans        | 482                  |
| 7 Spectrometer Frequency | 150.90               |
| 8 Nucleus                | <sup>13</sup> C      |

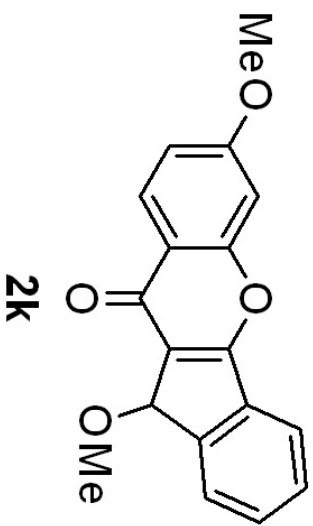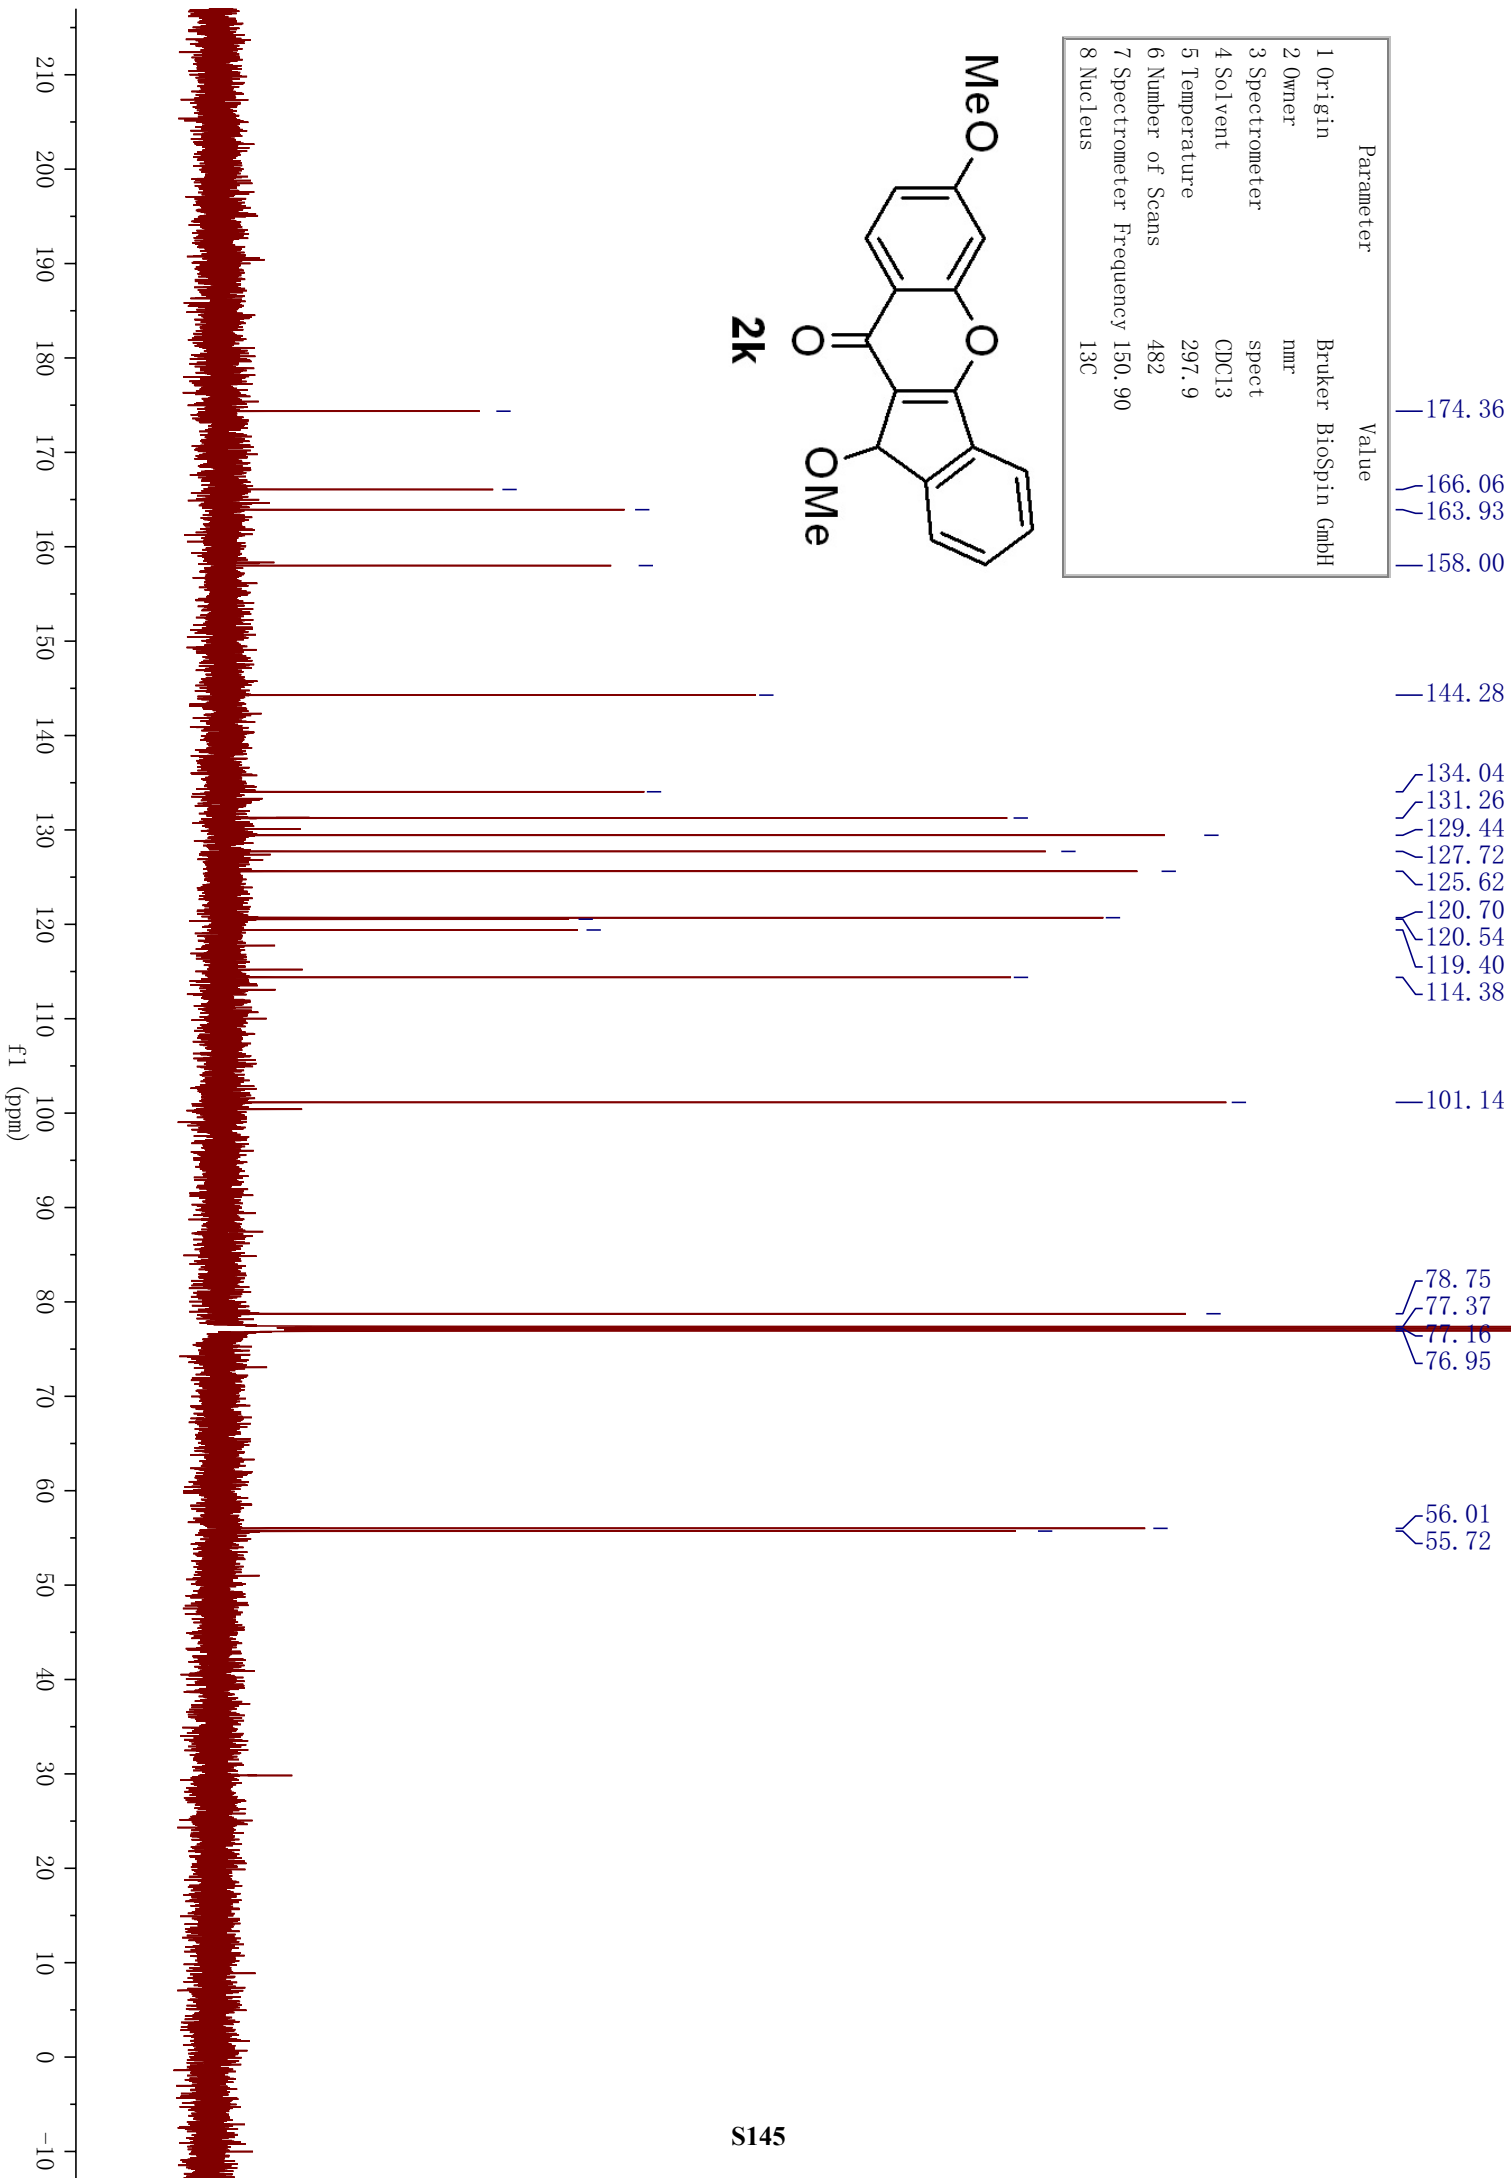

| Parameter                | Value                |
|--------------------------|----------------------|
| 1 Origin                 | Brucker BioSpin GmbH |
| 2 Owner                  | nmr                  |
| 3 Spectrometer           | spect                |
| 4 Solvent                | CDCl3                |
| 5 Temperature            | 297.9                |
| 6 Number of Scans        | 16                   |
| 7 Spectrometer Frequency | 600.13               |
| 8 Nucleus                | <sup>1</sup> H       |

- 7.97
- 7.77
- 7.76
- 7.71
- 7.69
- 7.56
- 7.55
- 7.53
- 7.52
- 7.51
- 7.49
- 7.35
- 7.26

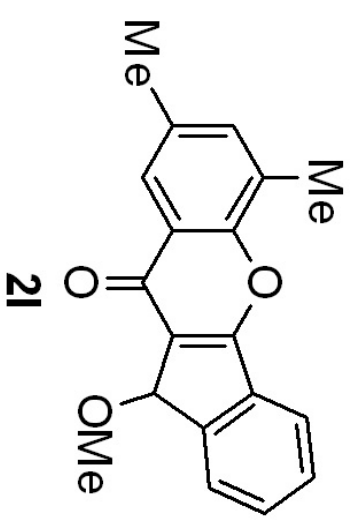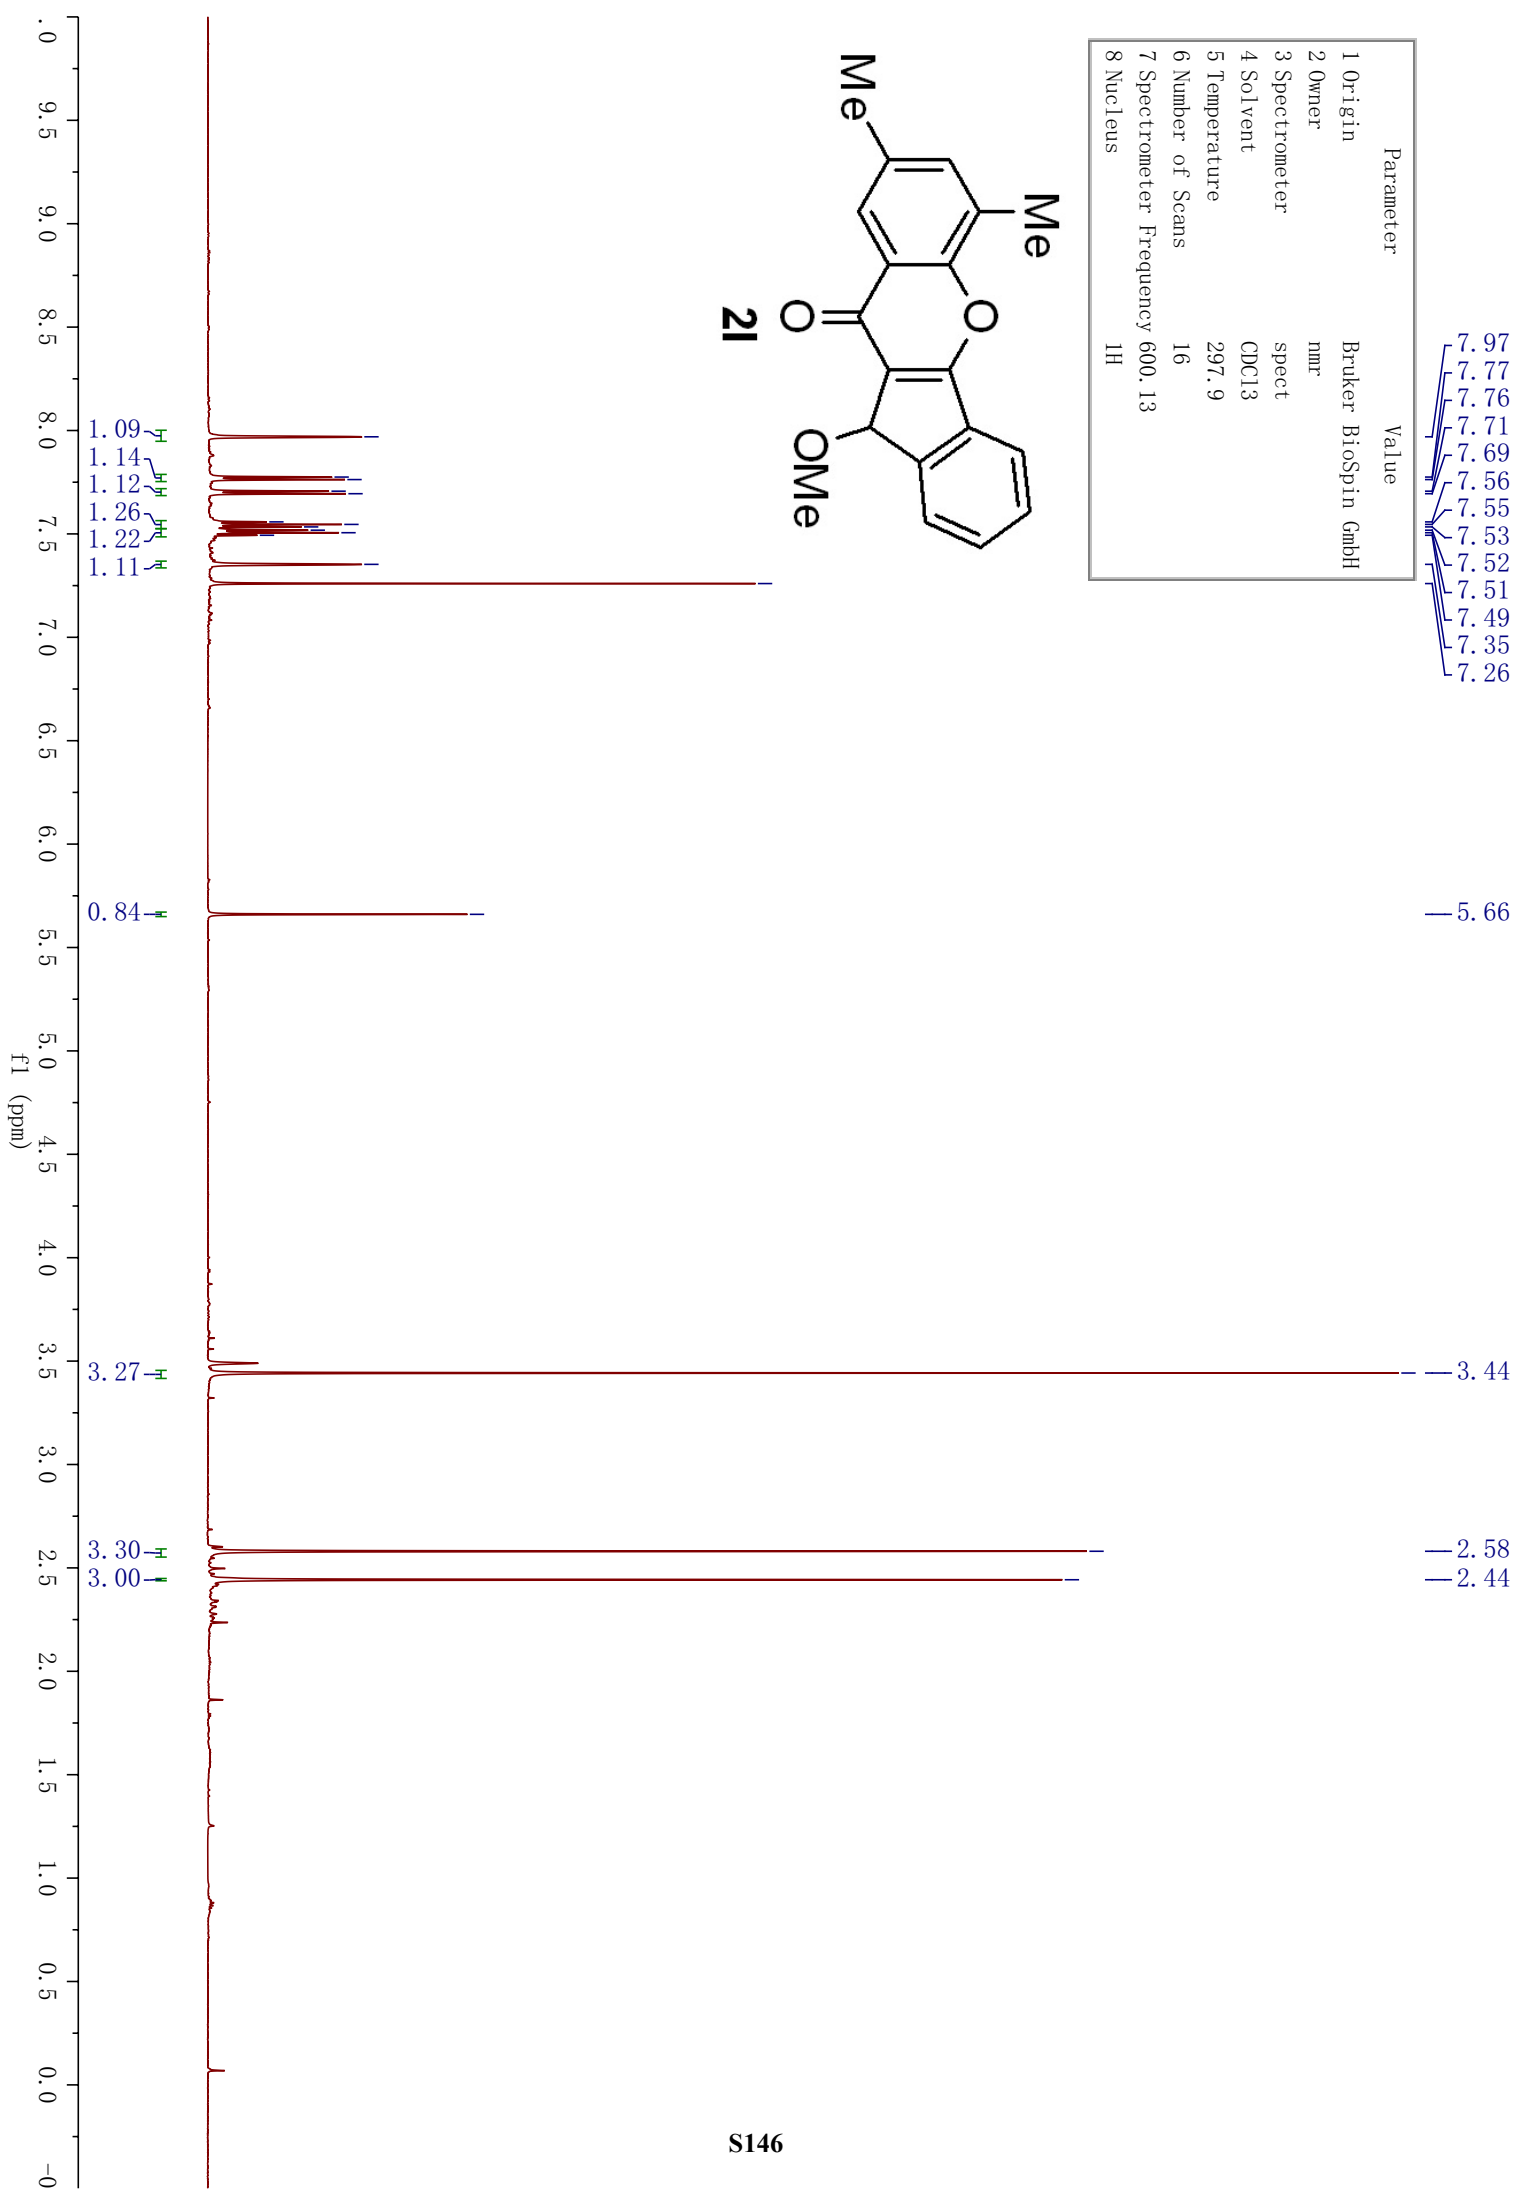

| Parameter                | Value               |
|--------------------------|---------------------|
| 1 Origin                 | Bruker Biospin GmbH |
| 2 Owner                  | nmr                 |
| 3 Spectrometer           | spect               |
| 4 Solvent                | CDCl3               |
| 5 Temperature            | 298.1               |
| 6 Number of Scans        | 6396                |
| 7 Spectrometer Frequency | 150.90              |
| 8 Nucleus                | <sup>13</sup> C     |

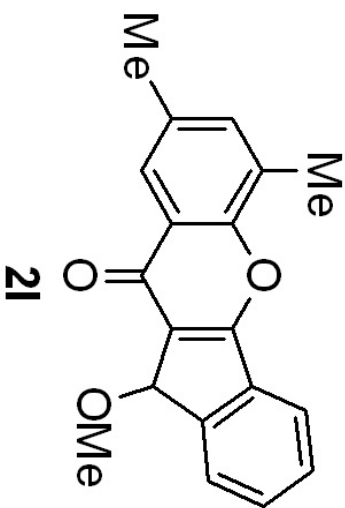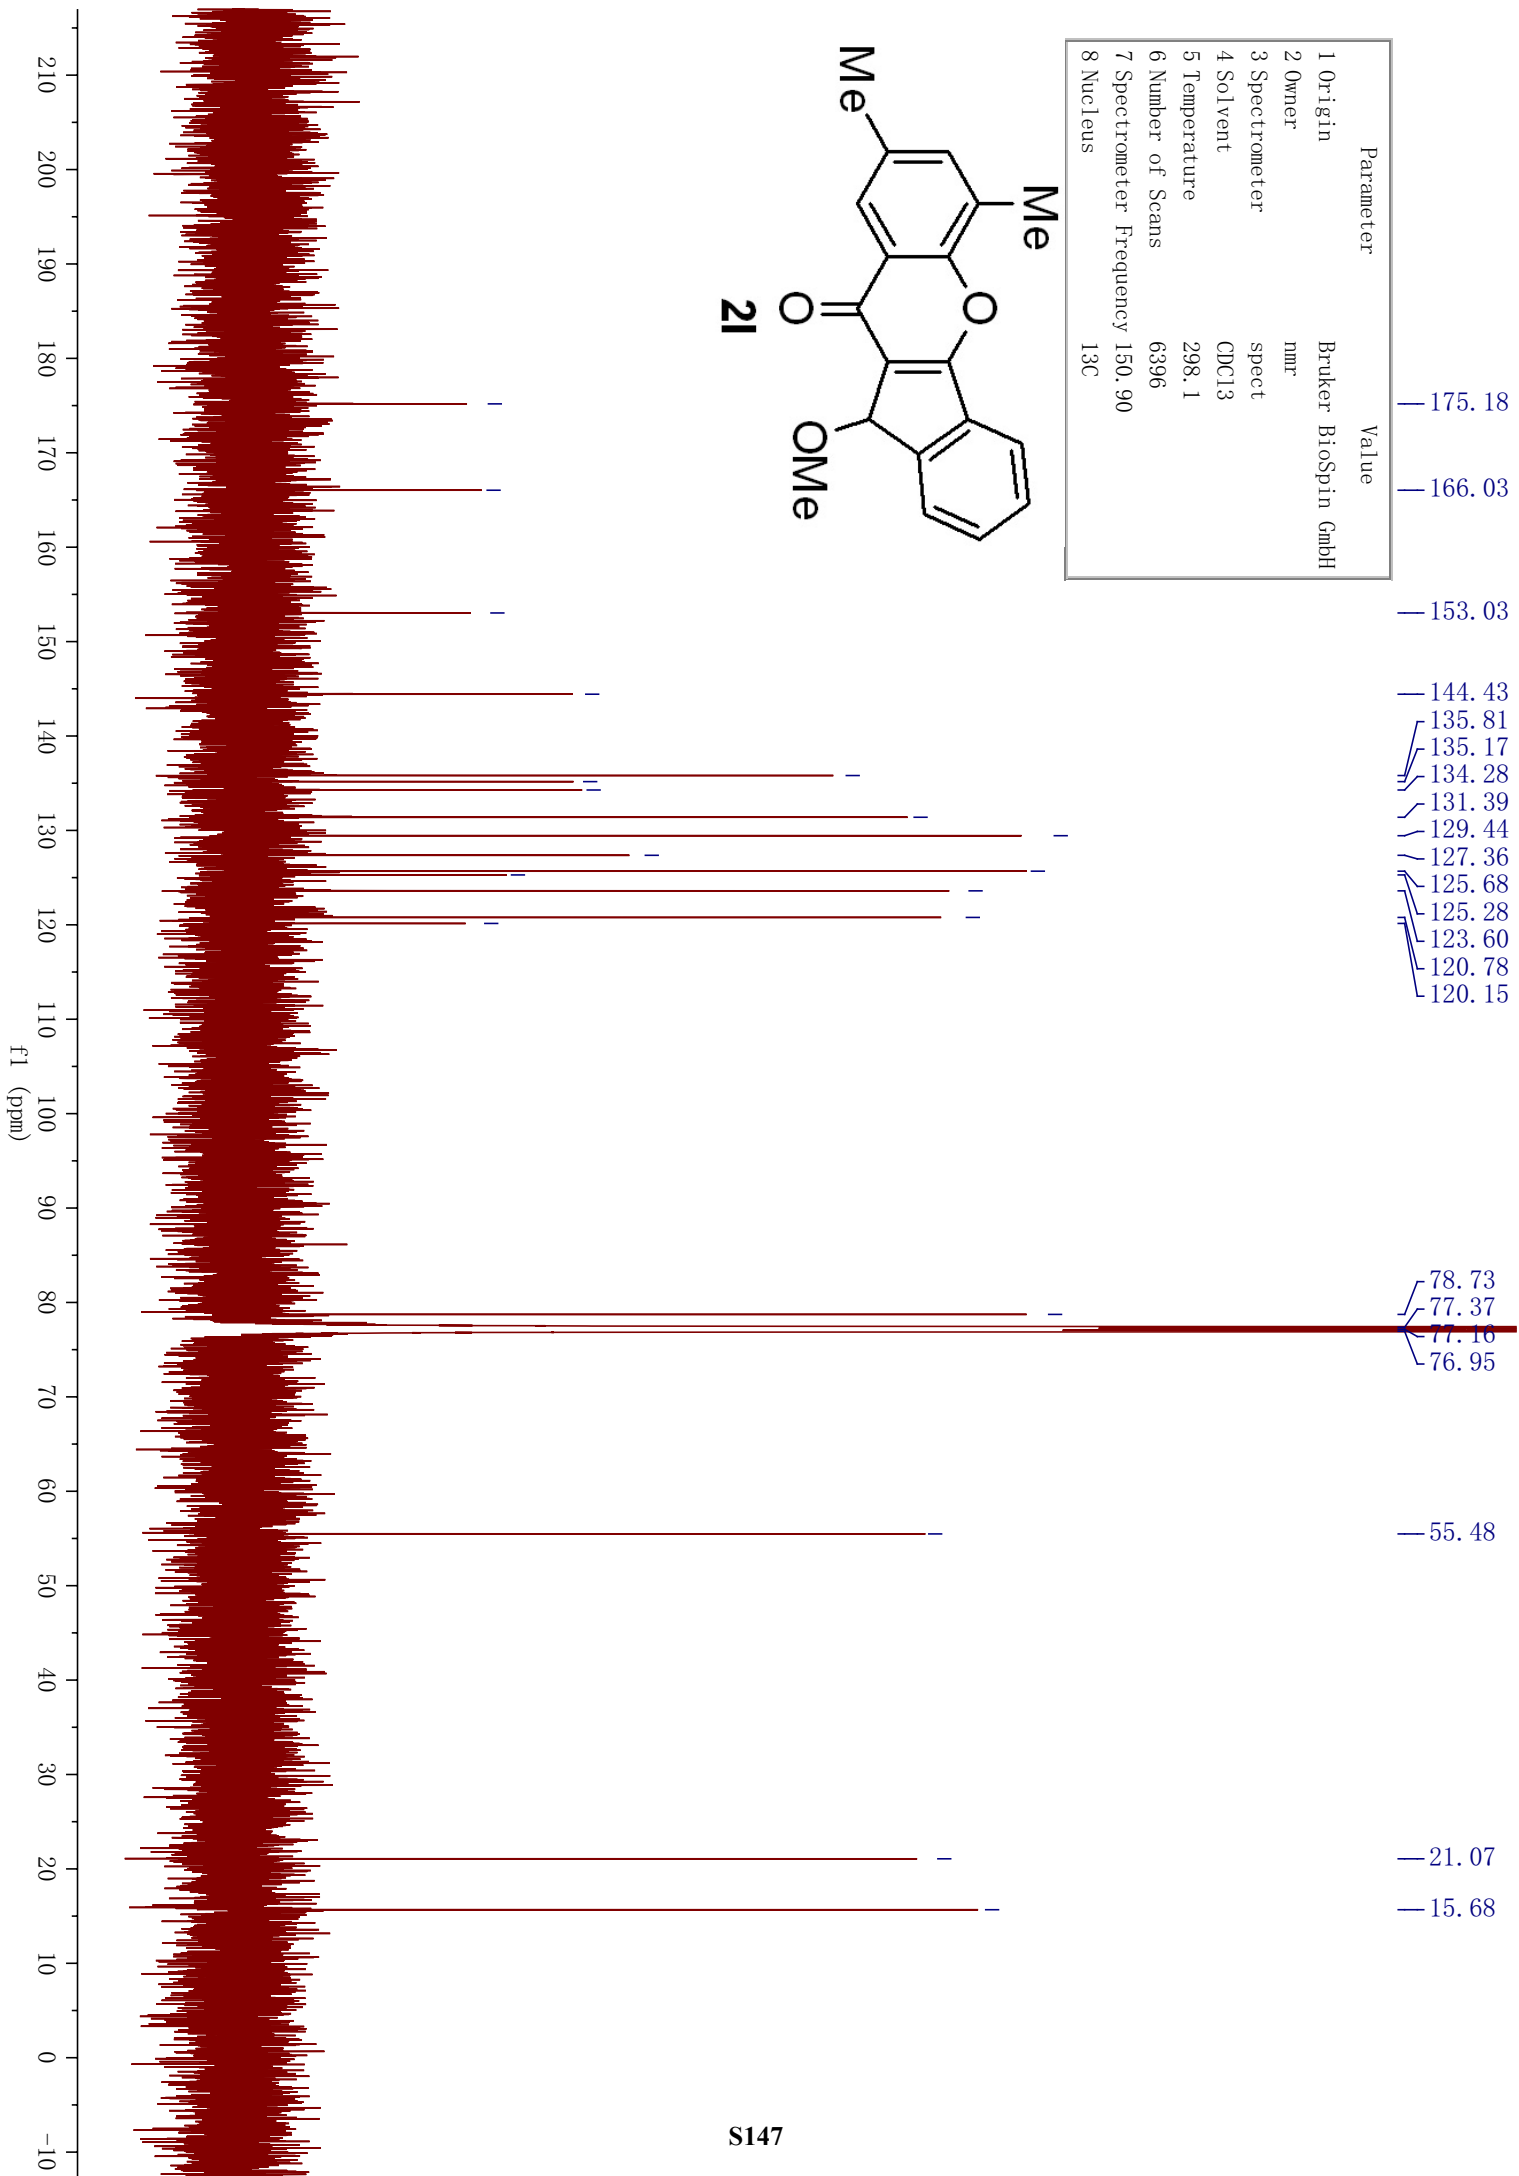



| Parameter                | Value               |
|--------------------------|---------------------|
| 1 Origin                 | Bruker Biospin GmbH |
| 2 Owner                  | nmr                 |
| 3 Spectrometer           | spect               |
| 4 Solvent                | CDCl3               |
| 5 Temperature            | 297.9               |
| 6 Number of Scans        | 16                  |
| 7 Spectrometer Frequency | 600.13              |
| 8 Nucleus                | <sup>1</sup> H      |

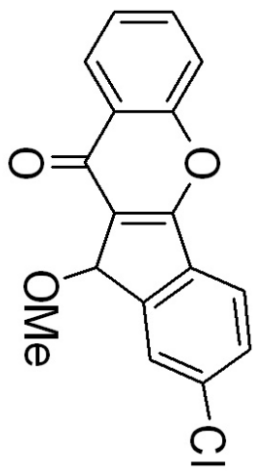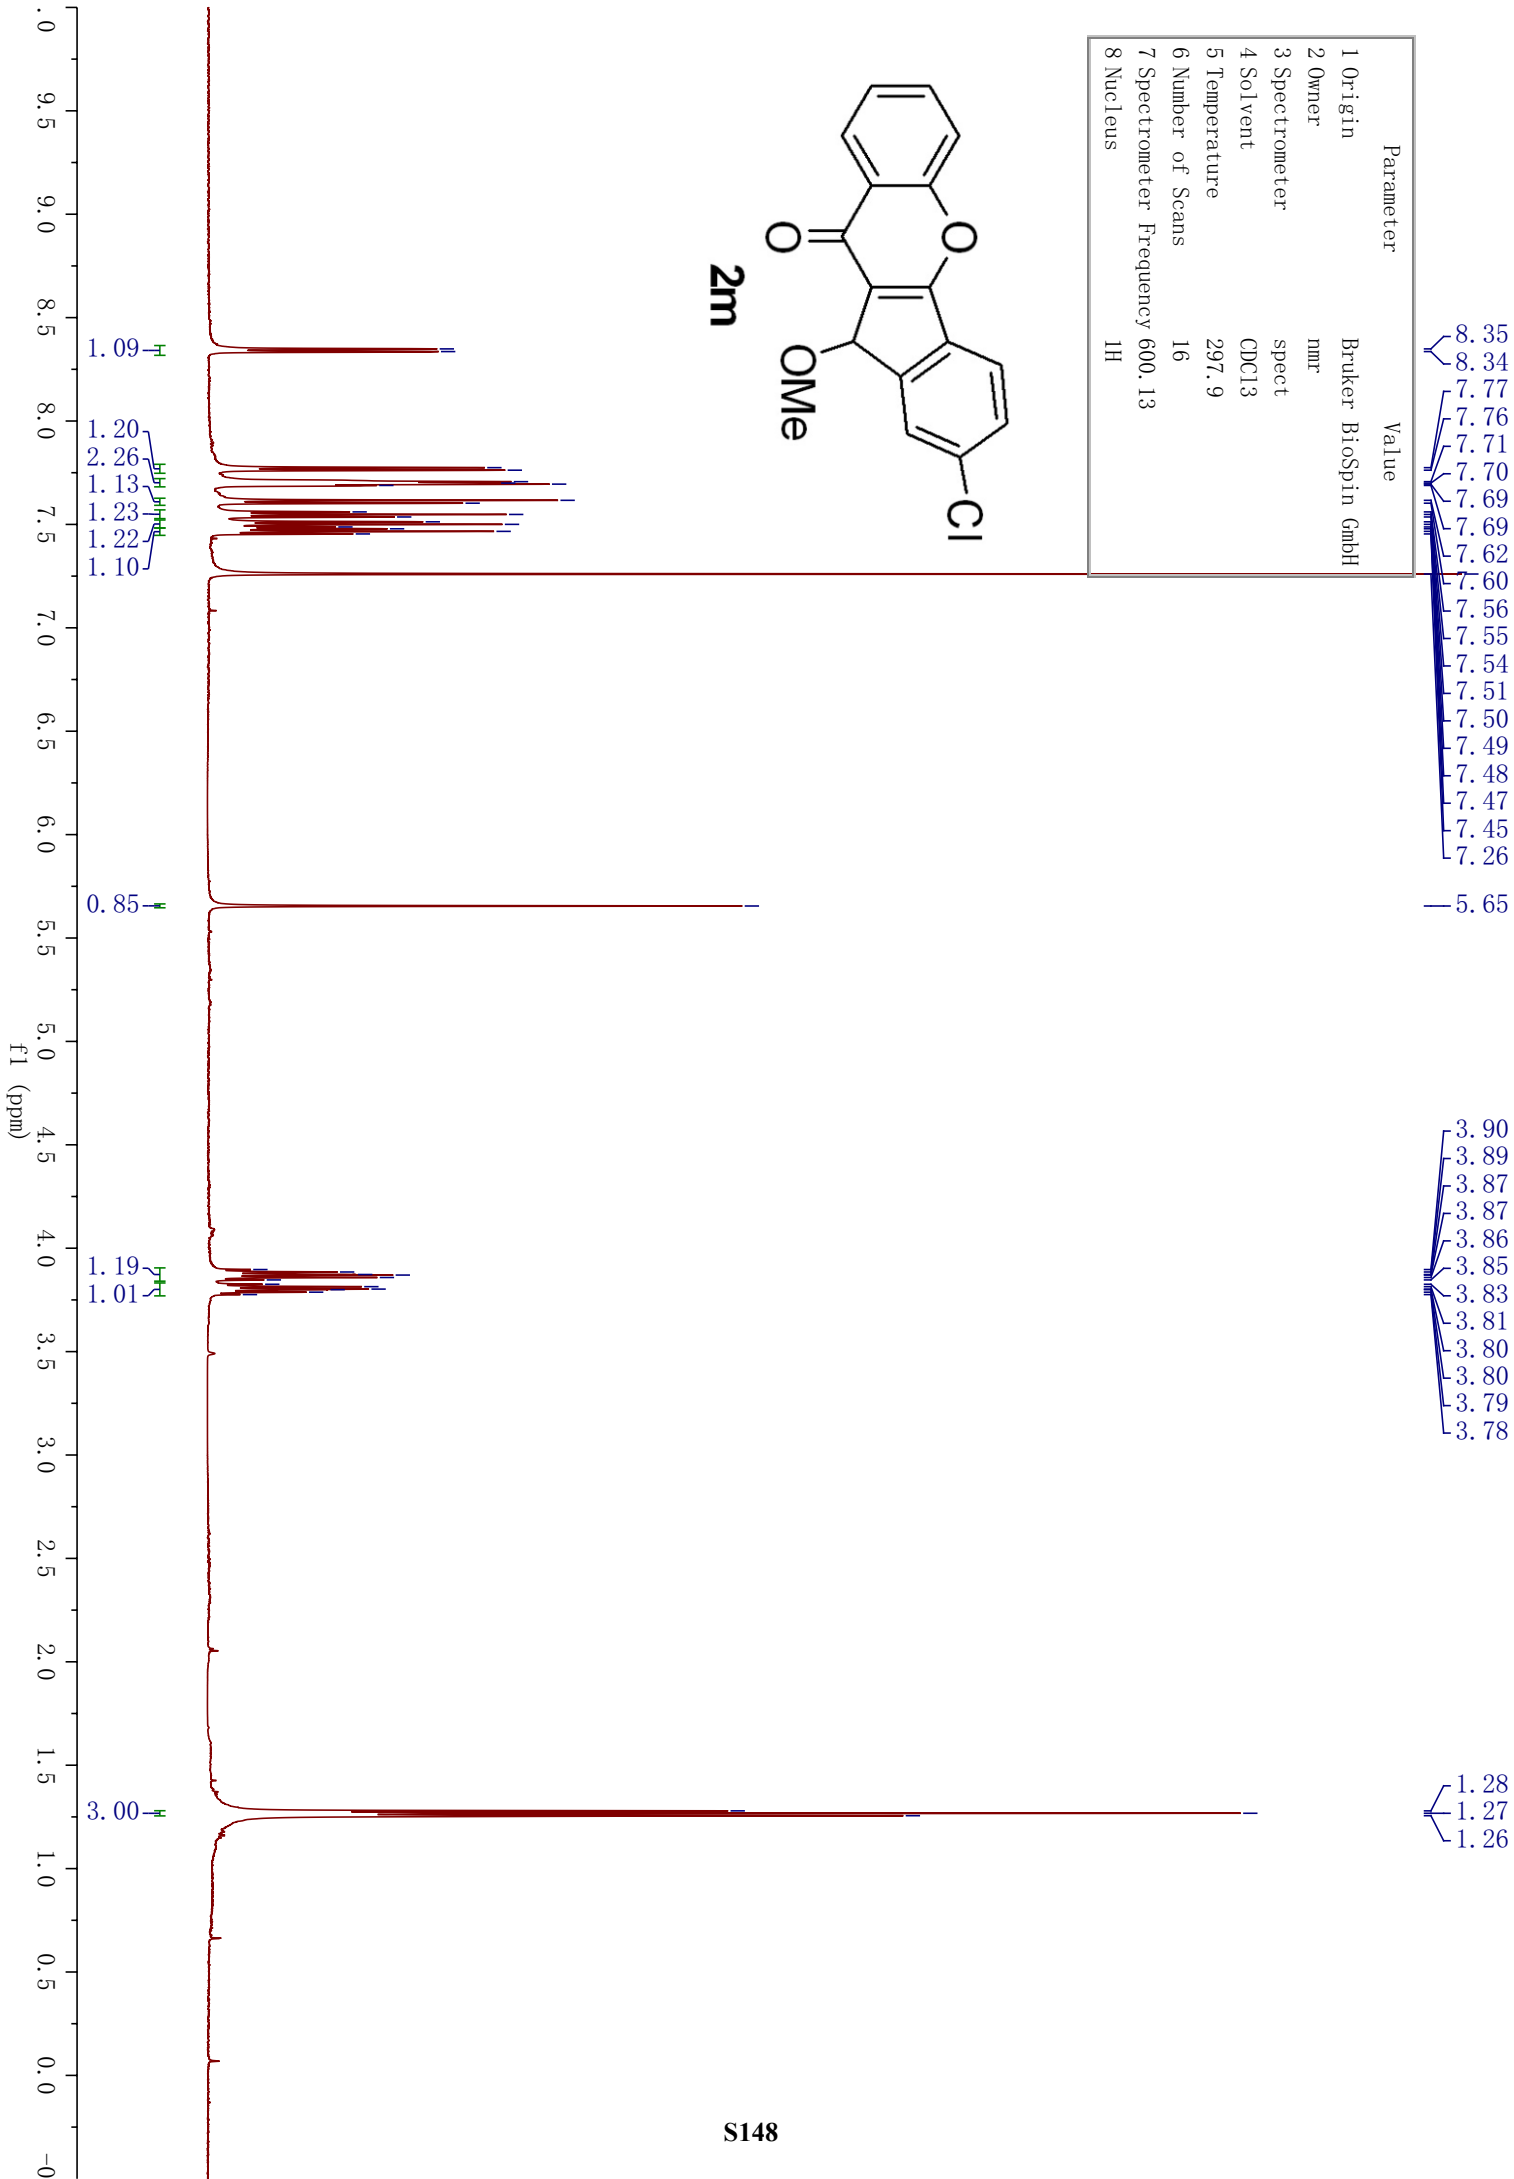

| Parameter                | Value                |
|--------------------------|----------------------|
| 1 Origin                 | Brucker Biospin GmbH |
| 2 Owner                  | nmr                  |
| 3 Spectrometer           | spect                |
| 4 Solvent                | CDCl3                |
| 5 Temperature            | 297.9                |
| 6 Number of Scans        | 4981                 |
| 7 Spectrometer Frequency | 150.90               |
| 8 Nucleus                | <sup>13</sup> C      |

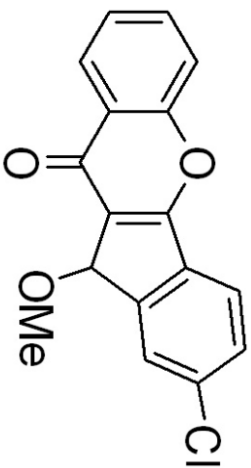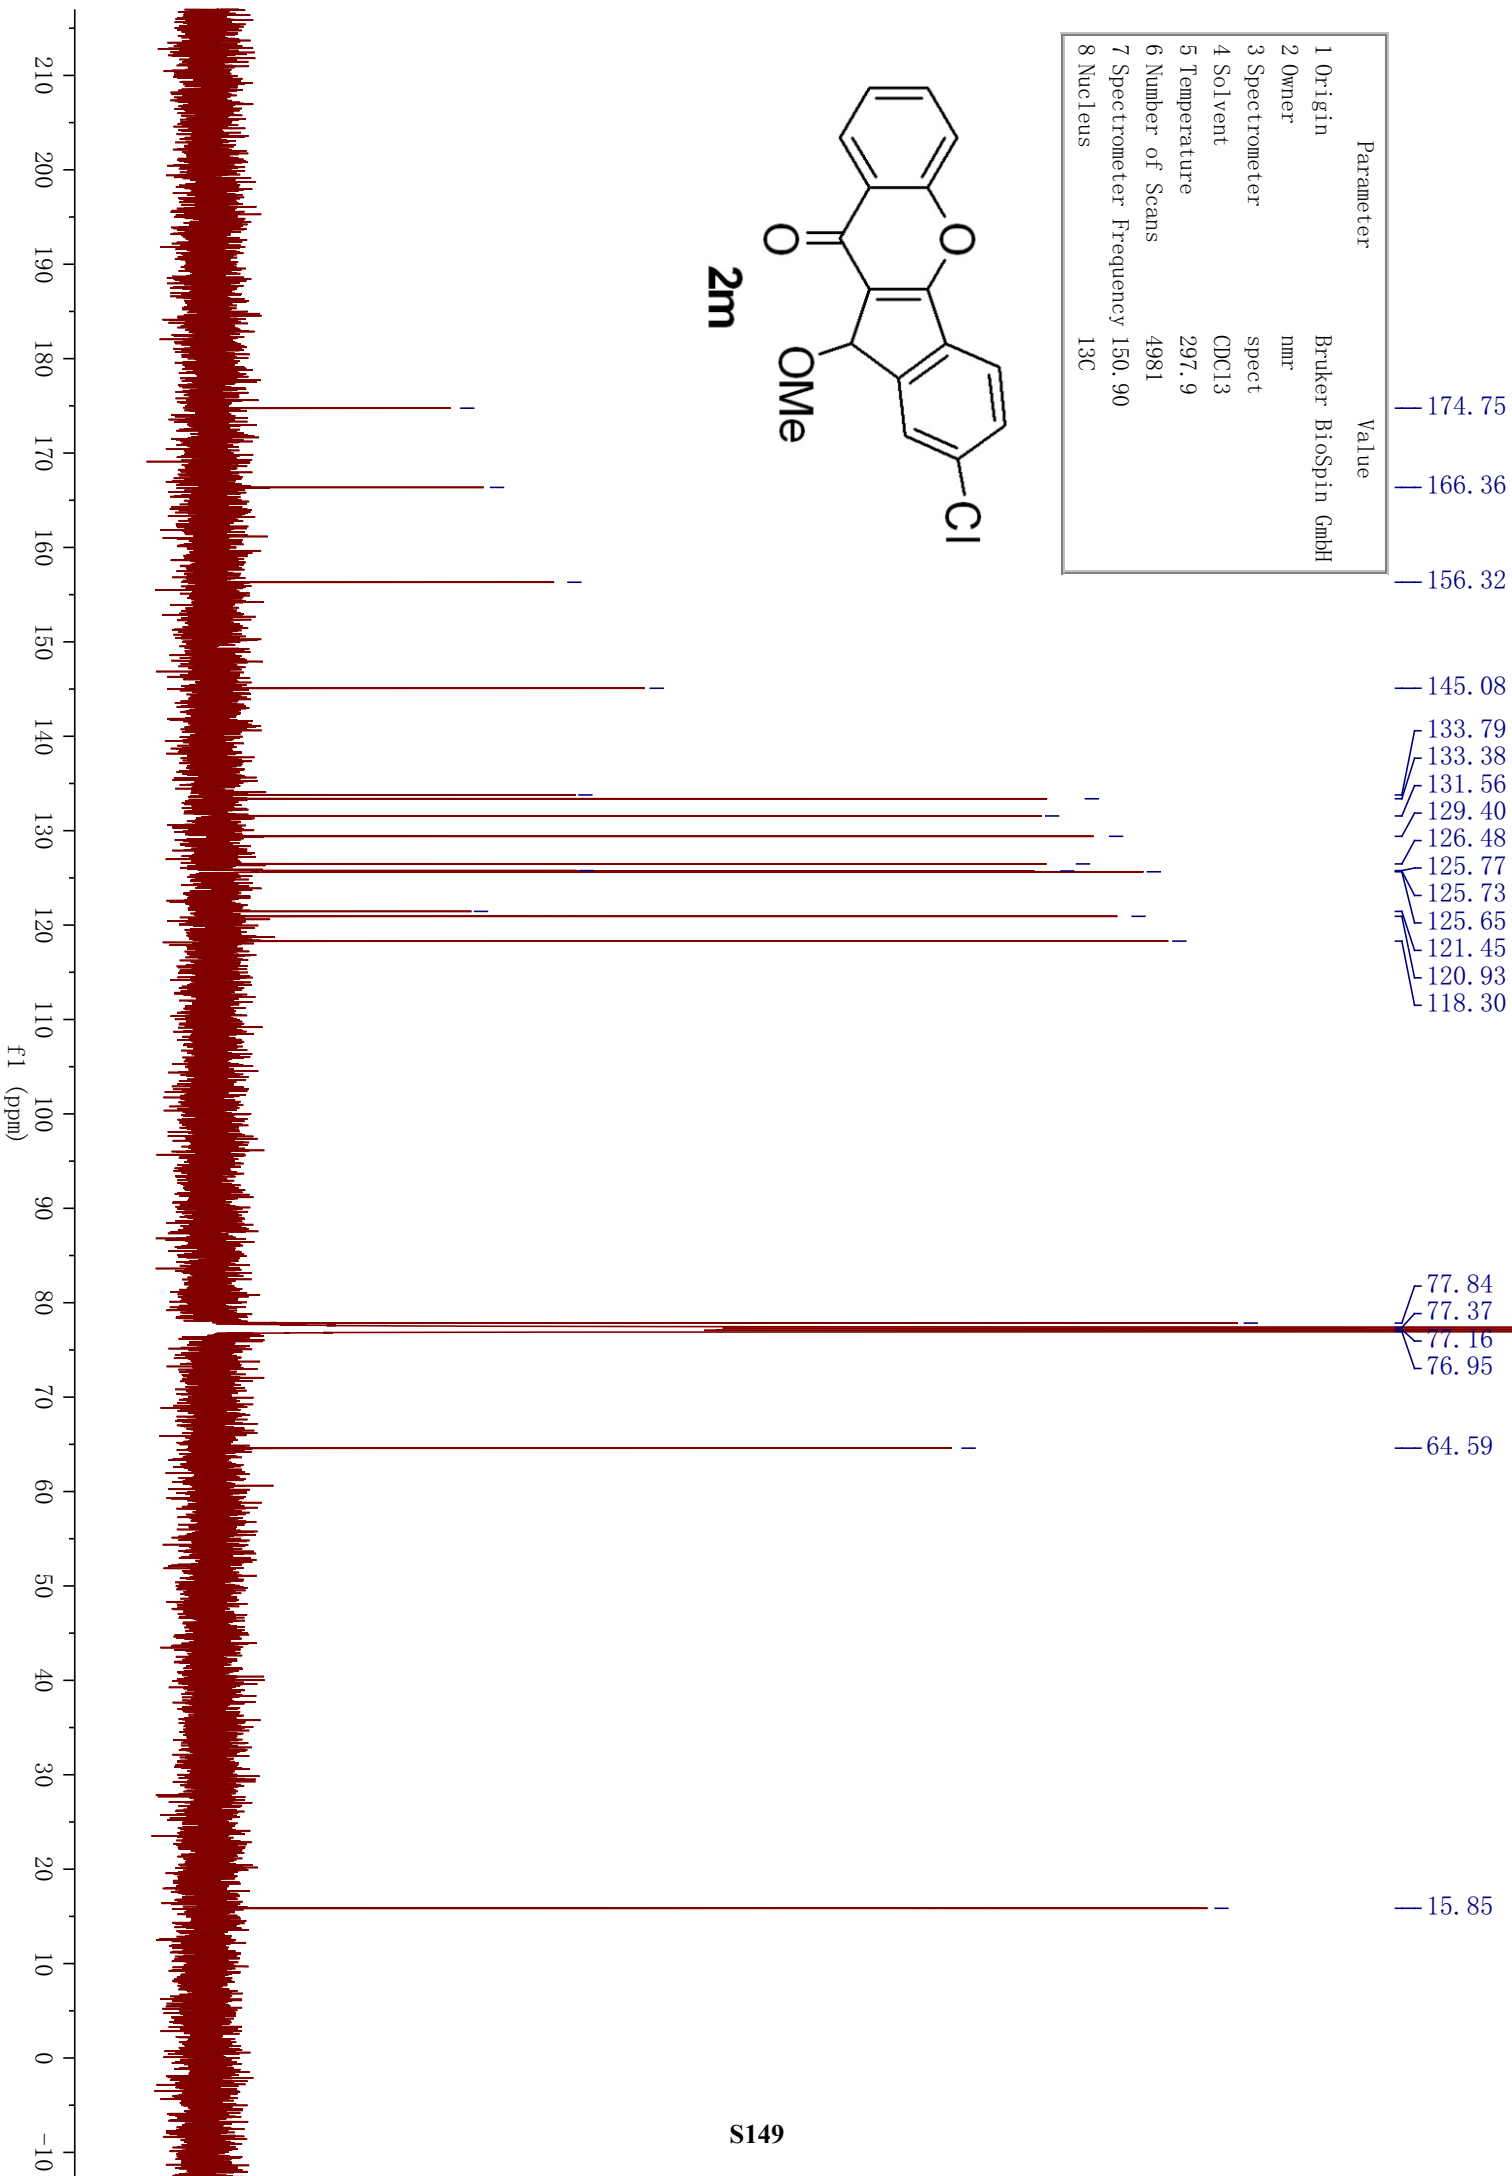

| Parameter                | Value                |
|--------------------------|----------------------|
| 1 Origin                 | Brucker BioSpin GmbH |
| 2 Owner                  | nmr                  |
| 3 Spectrometer           | spect                |
| 4 Solvent                | CDCl3                |
| 5 Temperature            | 297.9                |
| 6 Number of Scans        | 16                   |
| 7 Spectrometer Frequency | 600.13               |
| 8 Nucleus                | <sup>1</sup> H       |

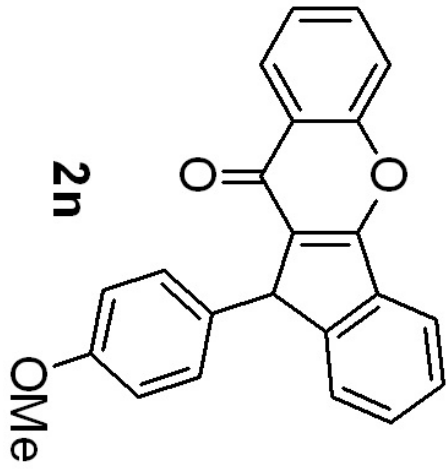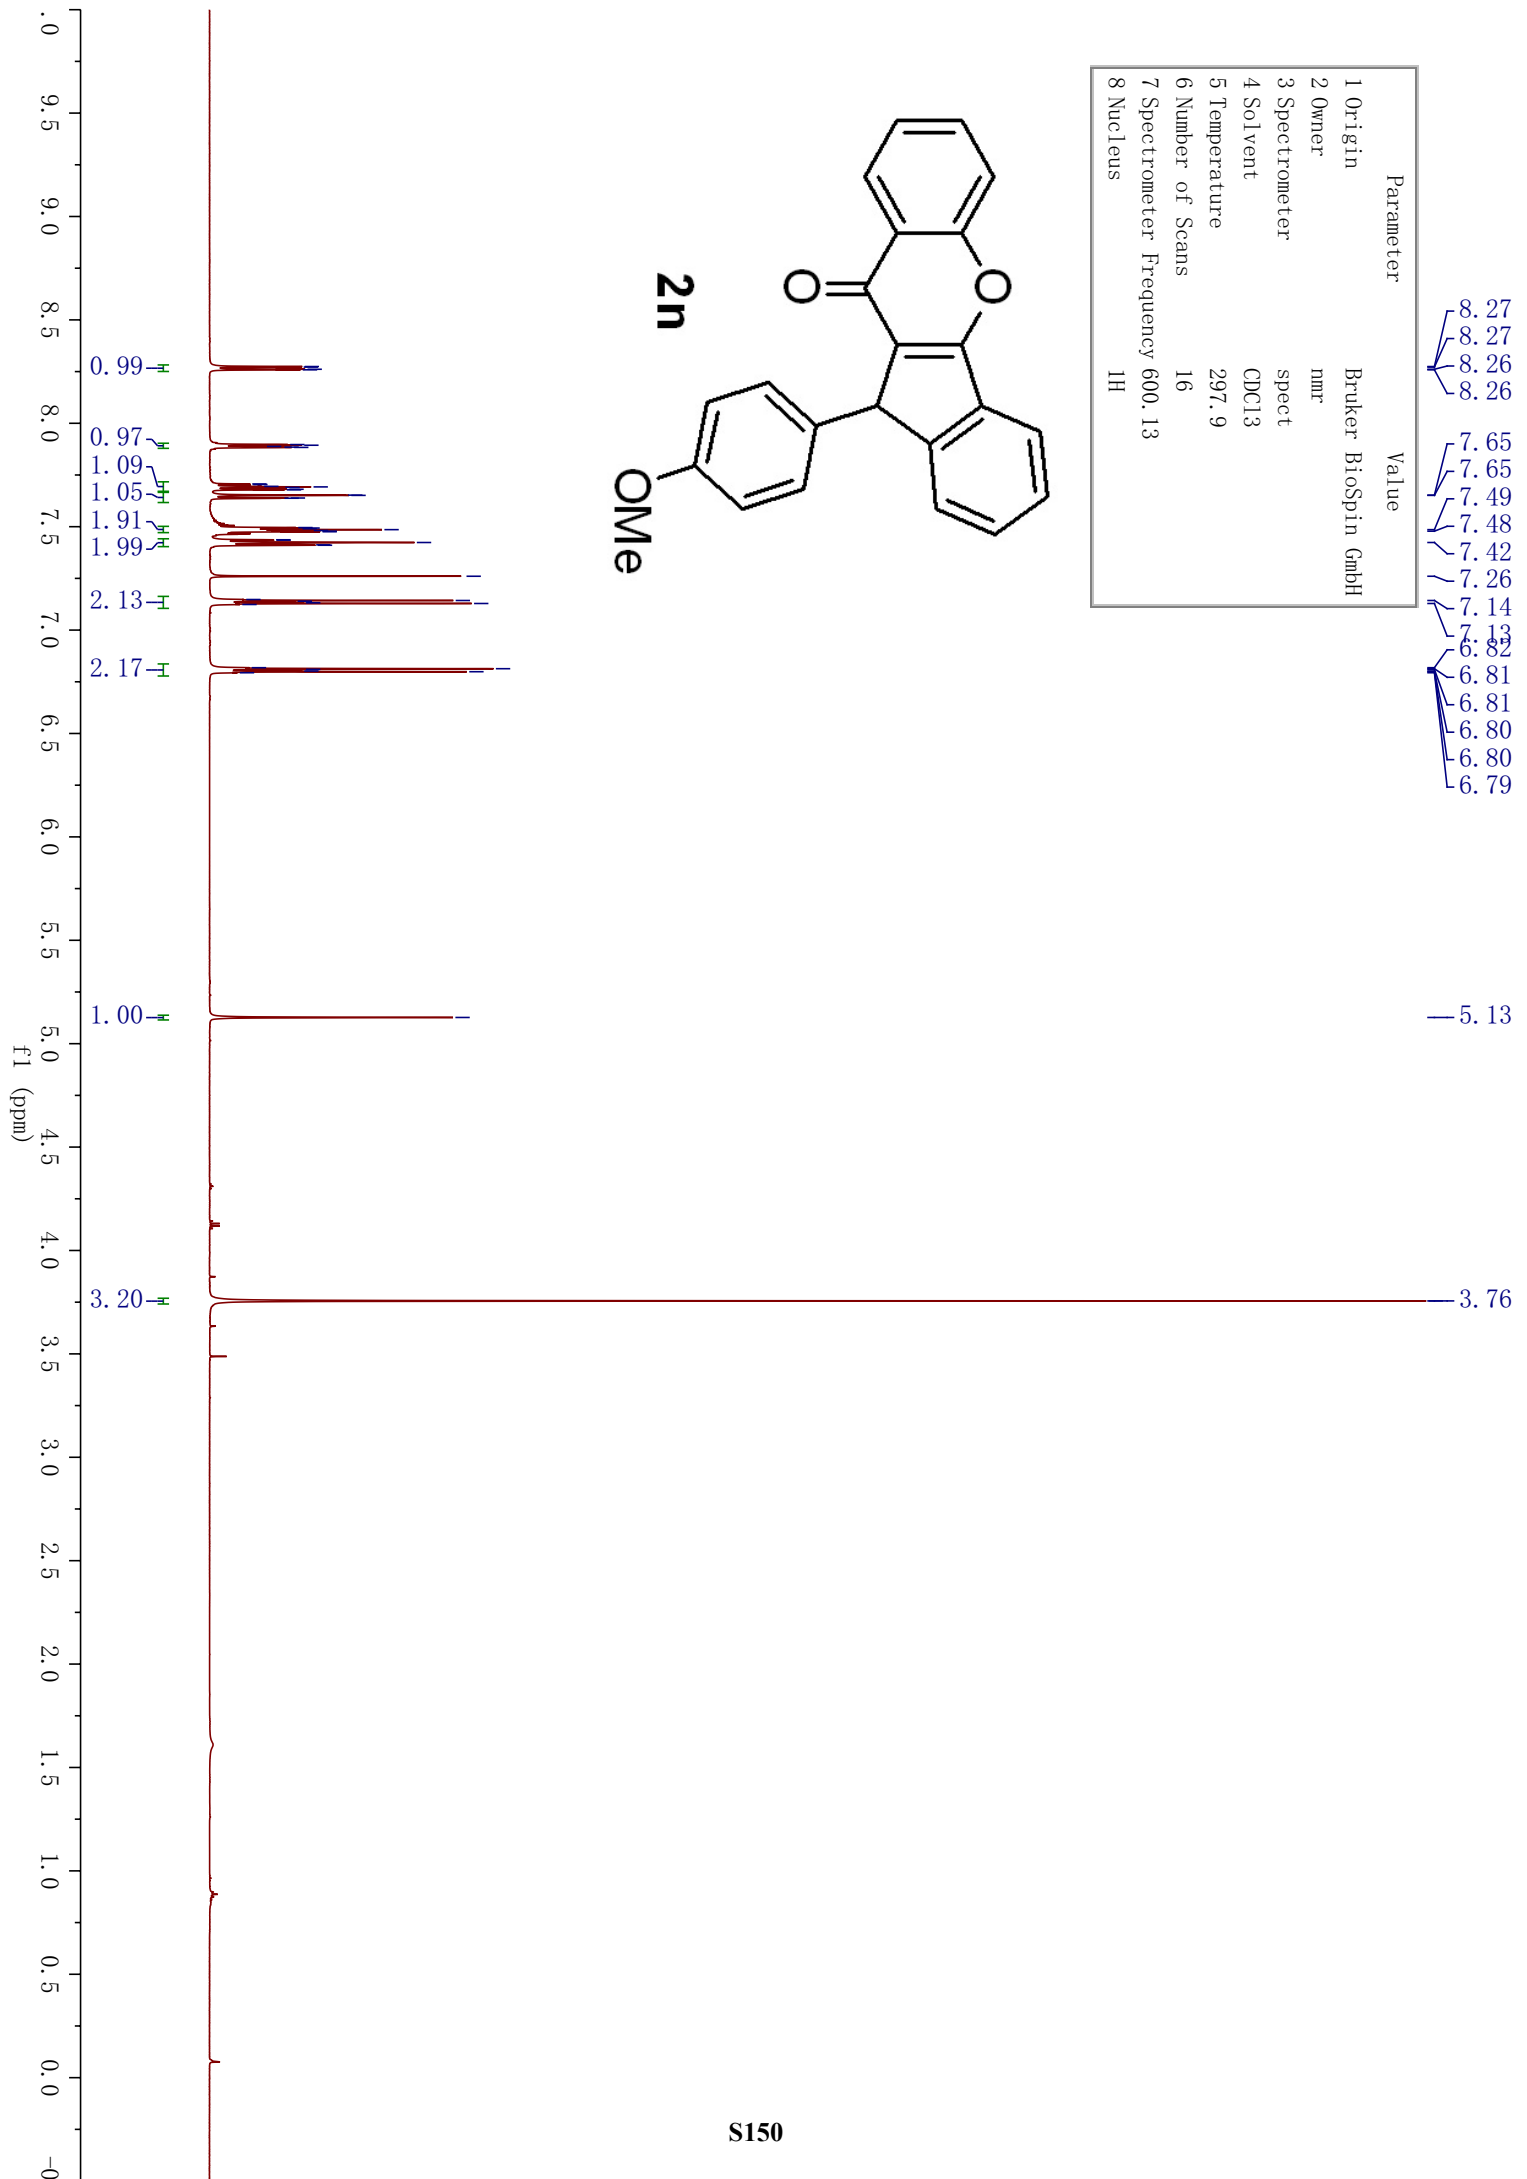

| Parameter                | Value                |
|--------------------------|----------------------|
| 1 Origin                 | Brucker BioSpin GmbH |
| 2 Owner                  | nmr                  |
| 3 Spectrometer           | spect                |
| 4 Solvent                | CDCl3                |
| 5 Temperature            | 297.9                |
| 6 Number of Scans        | 209                  |
| 7 Spectrometer Frequency | 150.90               |
| 8 Nucleus                | <sup>13</sup> C      |

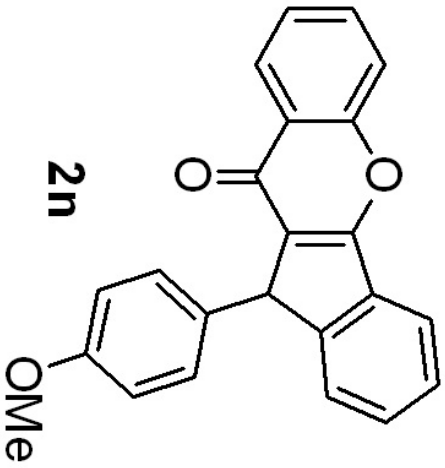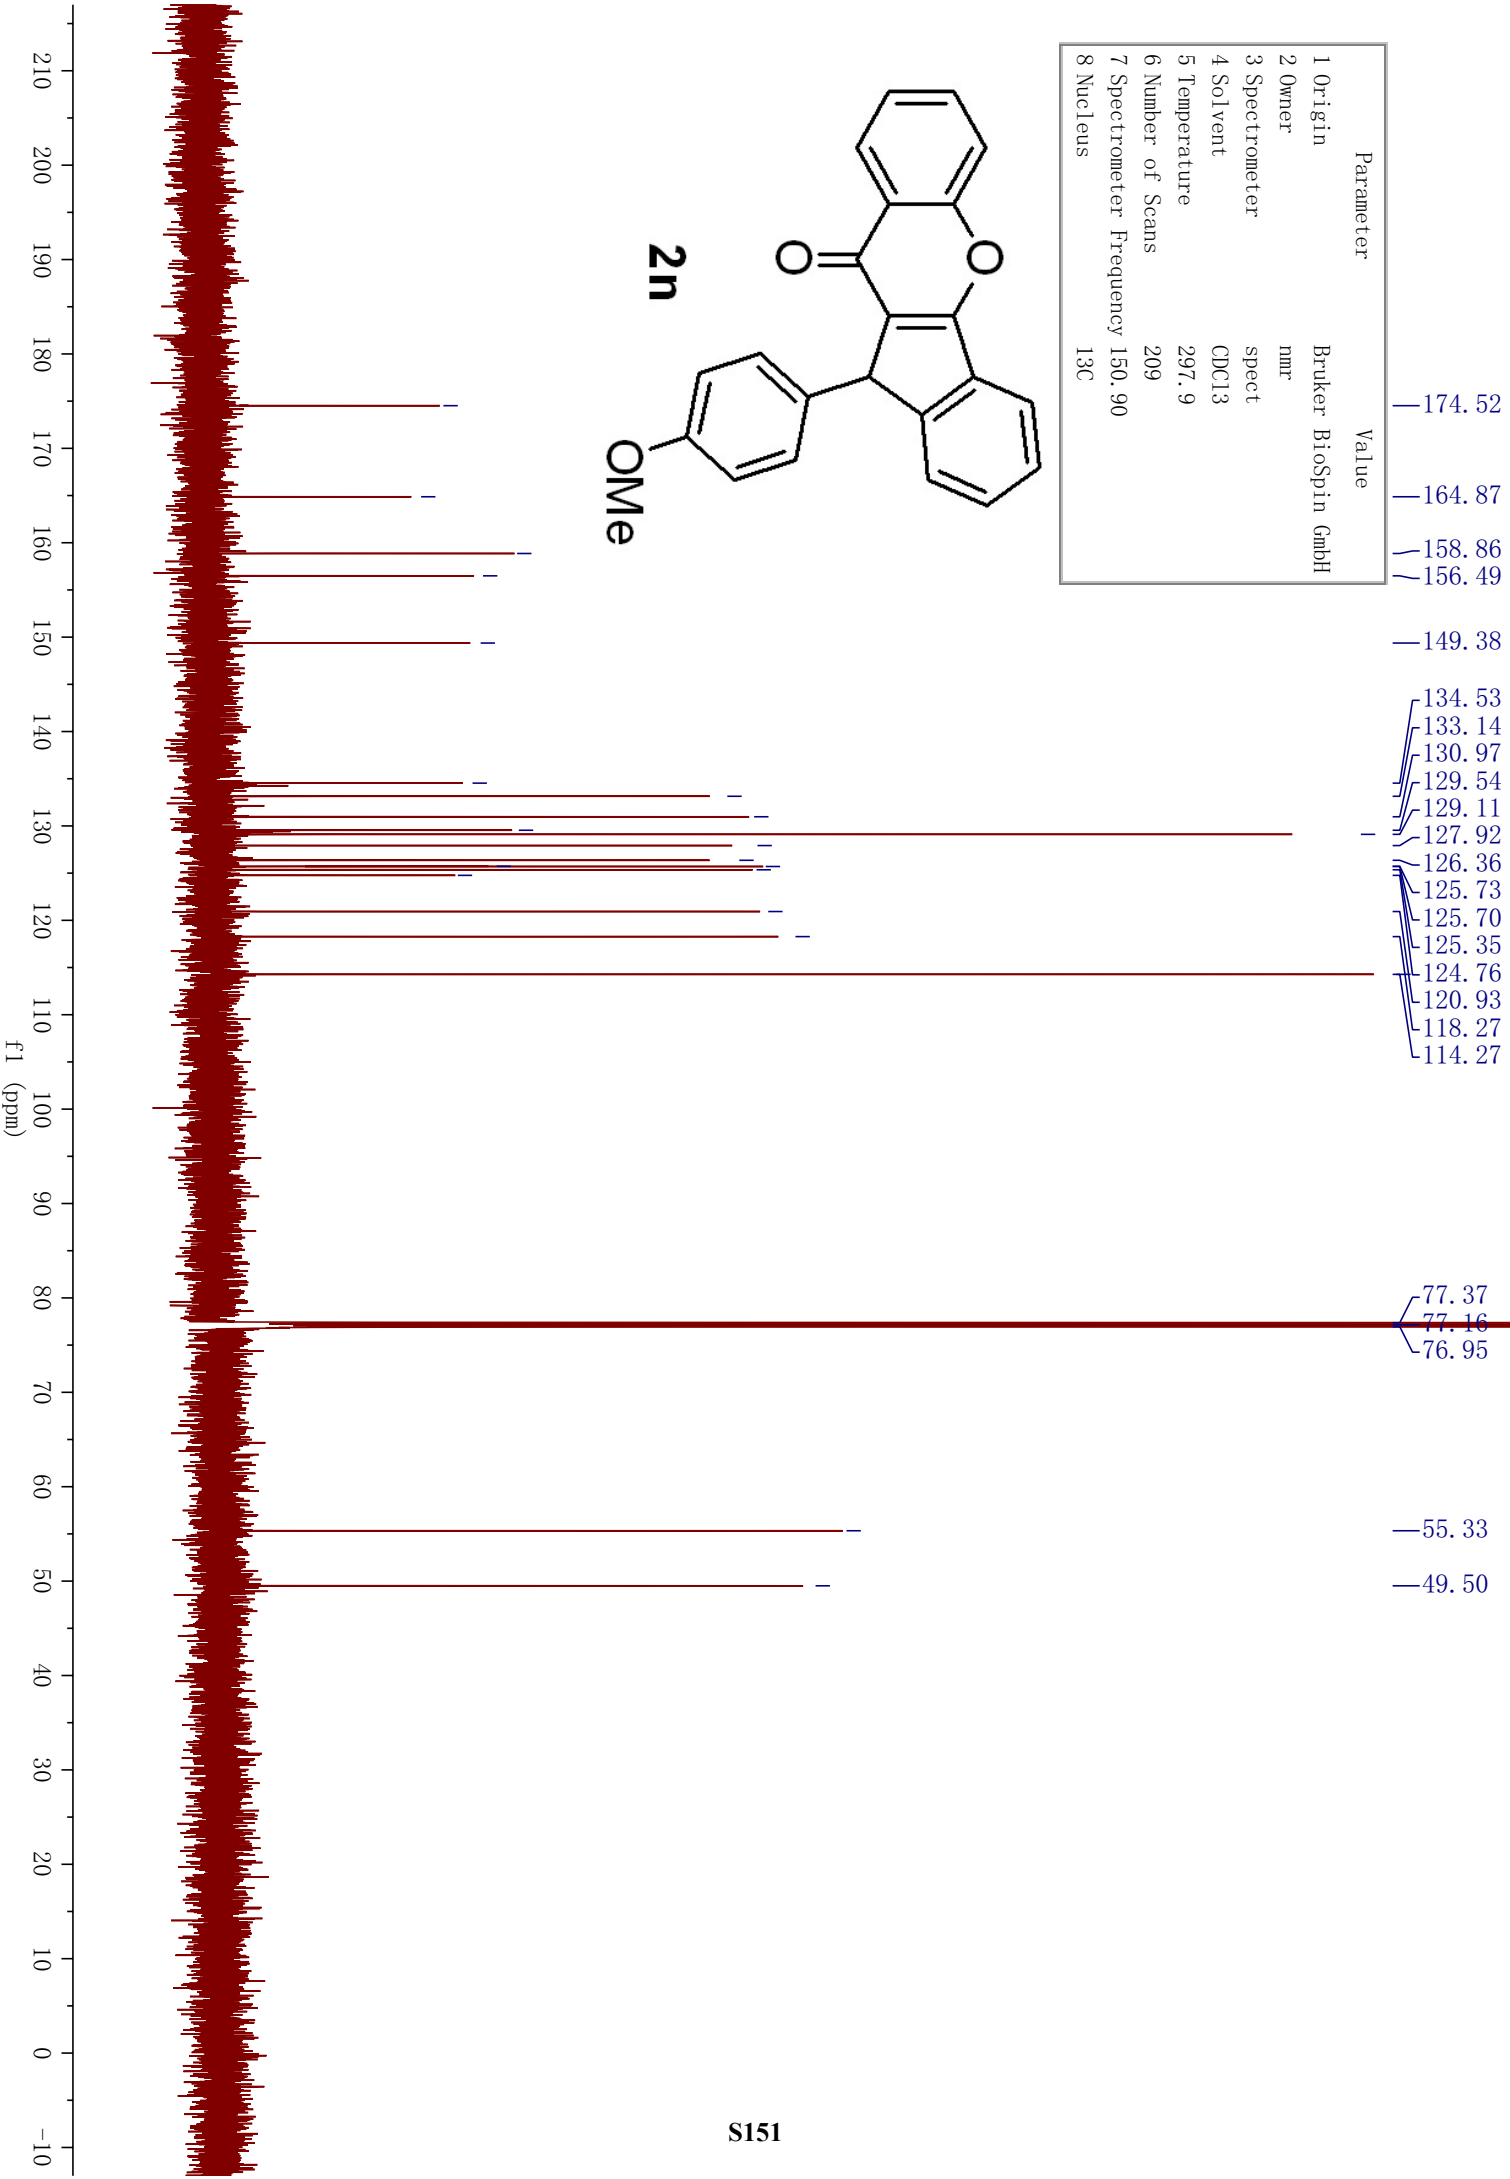

| Parameter                | Value               |
|--------------------------|---------------------|
| 1 Origin                 | Bruker BioSpin GmbH |
| 2 Owner                  | nmr                 |
| 3 Spectrometer           | spect               |
| 4 Solvent                | CDCl3               |
| 5 Temperature            | 297.9               |
| 6 Number of Scans        | 16                  |
| 7 Spectrometer Frequency | 600.13              |
| 8 Nucleus                | <sup>1</sup> H      |

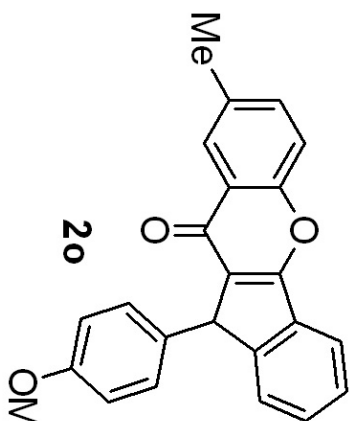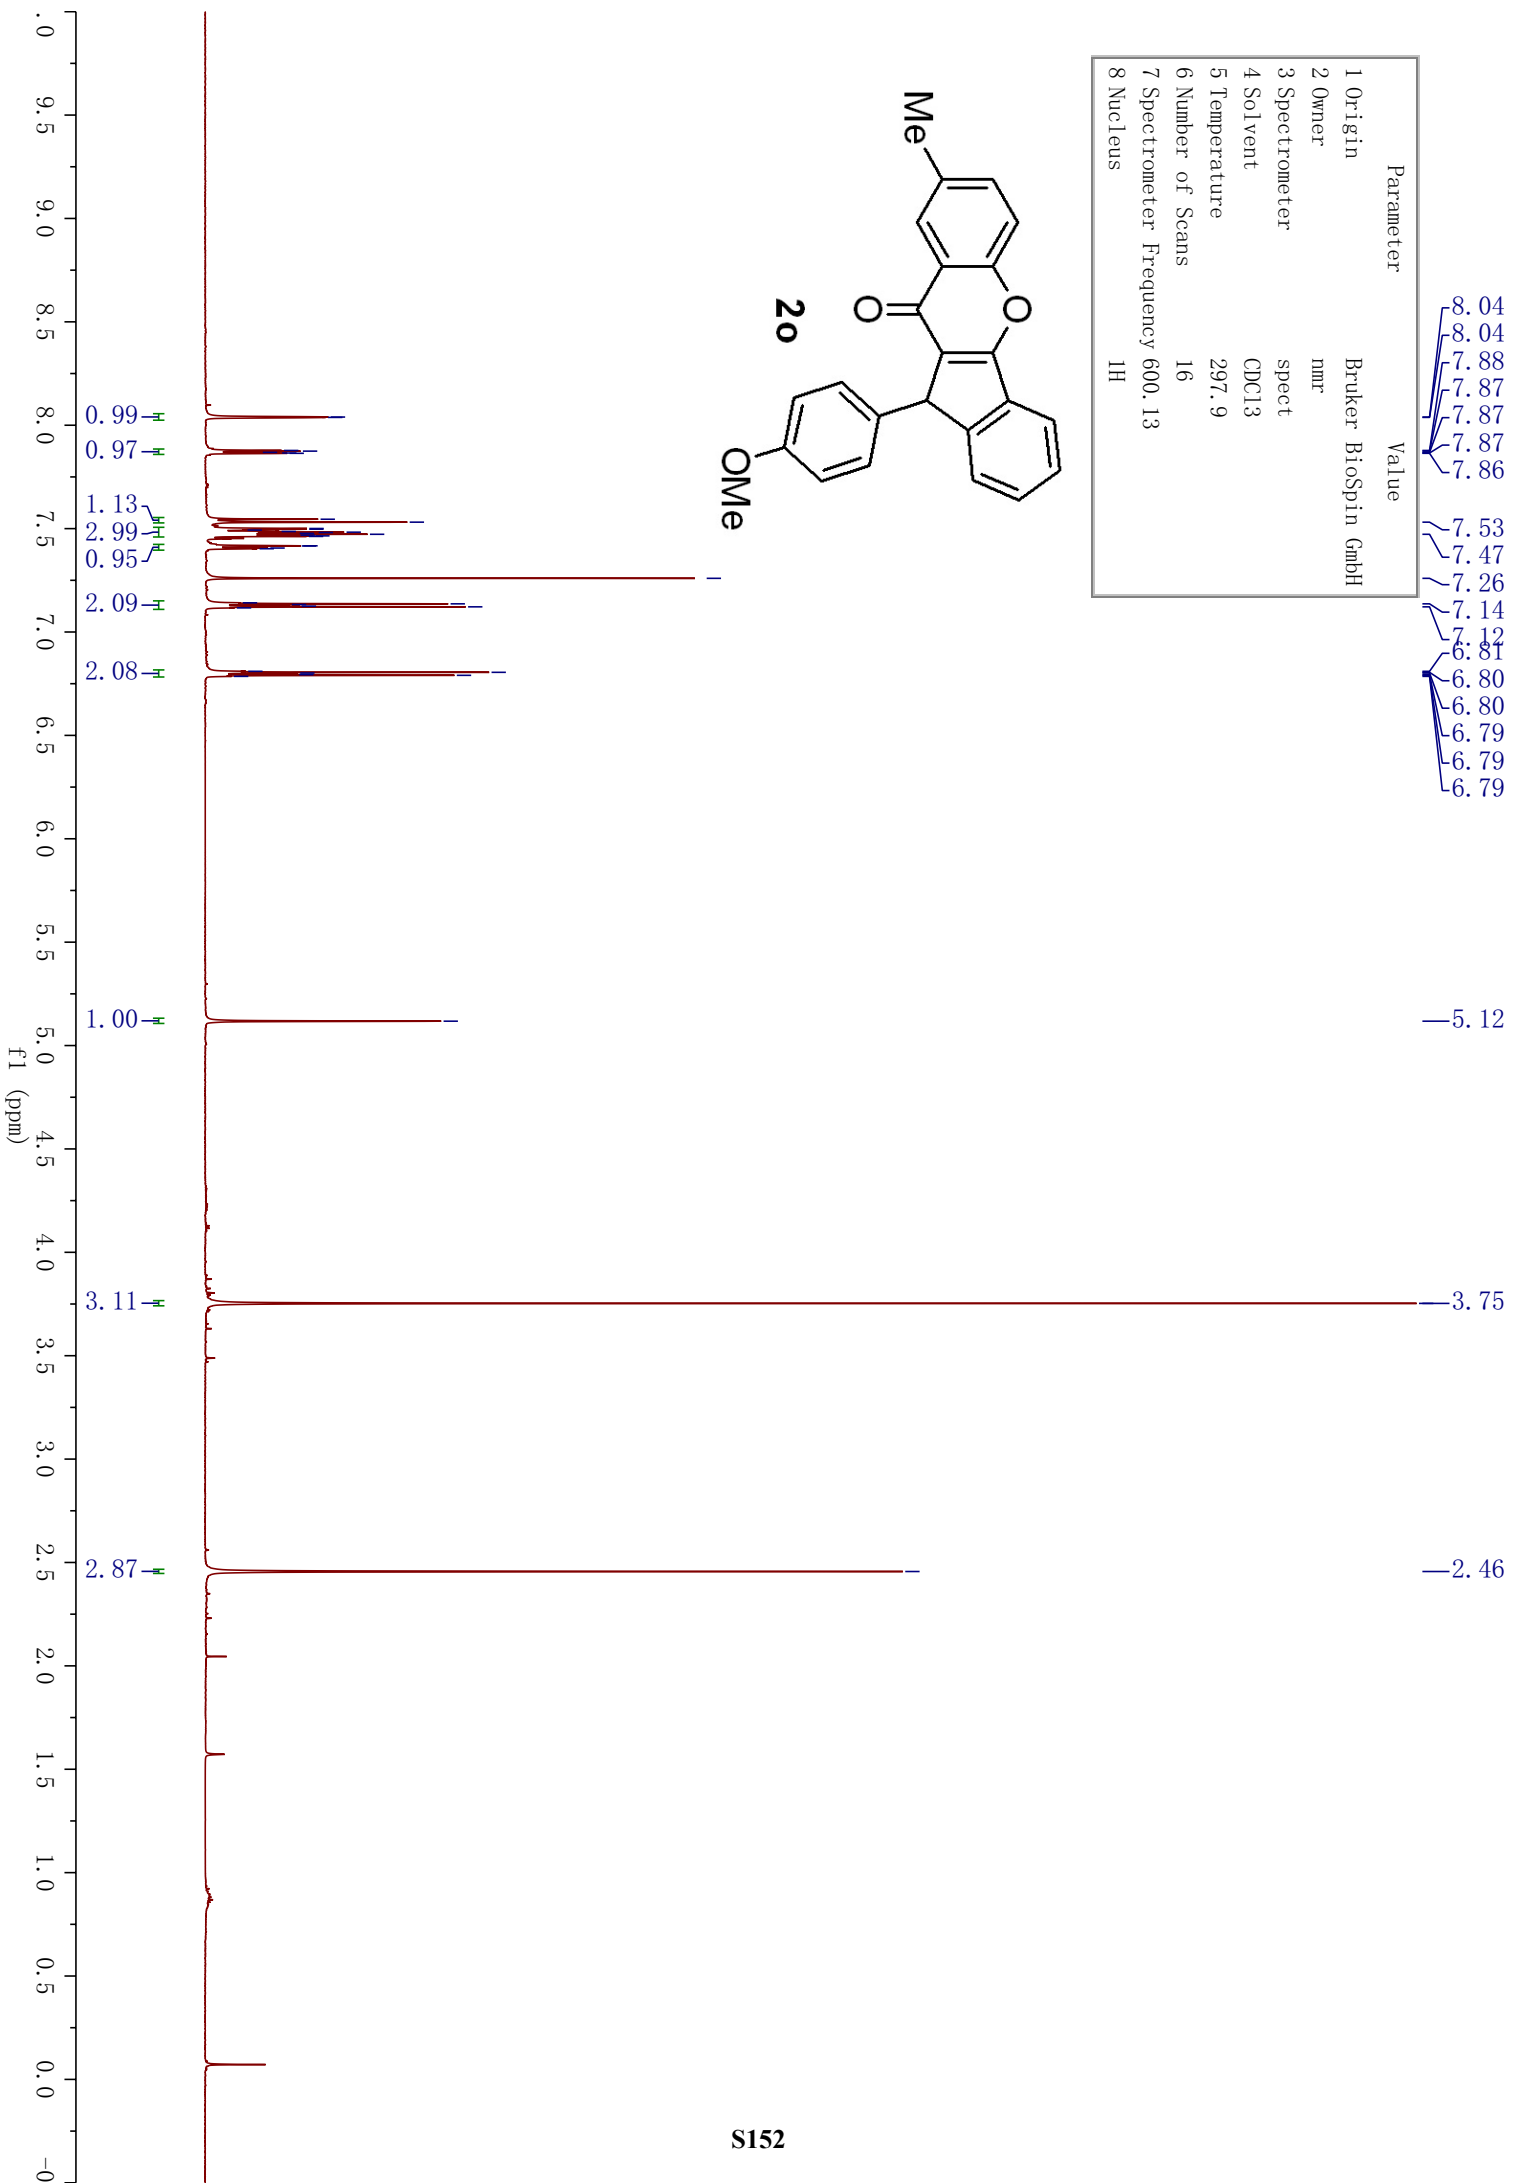

| Parameter                | Value                |
|--------------------------|----------------------|
| 1 Origin                 | Brucker Biospin GmbH |
| 2 Owner                  | nmr                  |
| 3 Spectrometer           | spect                |
| 4 Solvent                | CDCl3                |
| 5 Temperature            | 297.9                |
| 6 Number of Scans        | 422                  |
| 7 Spectrometer Frequency | 150.90               |
| 8 Nucleus                | <sup>13</sup> C      |

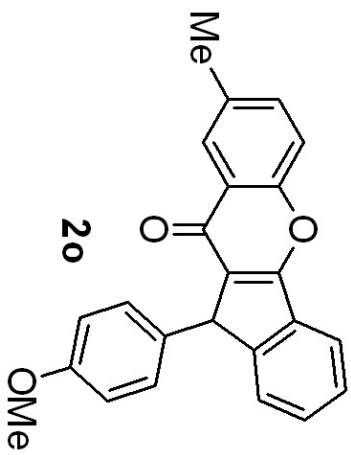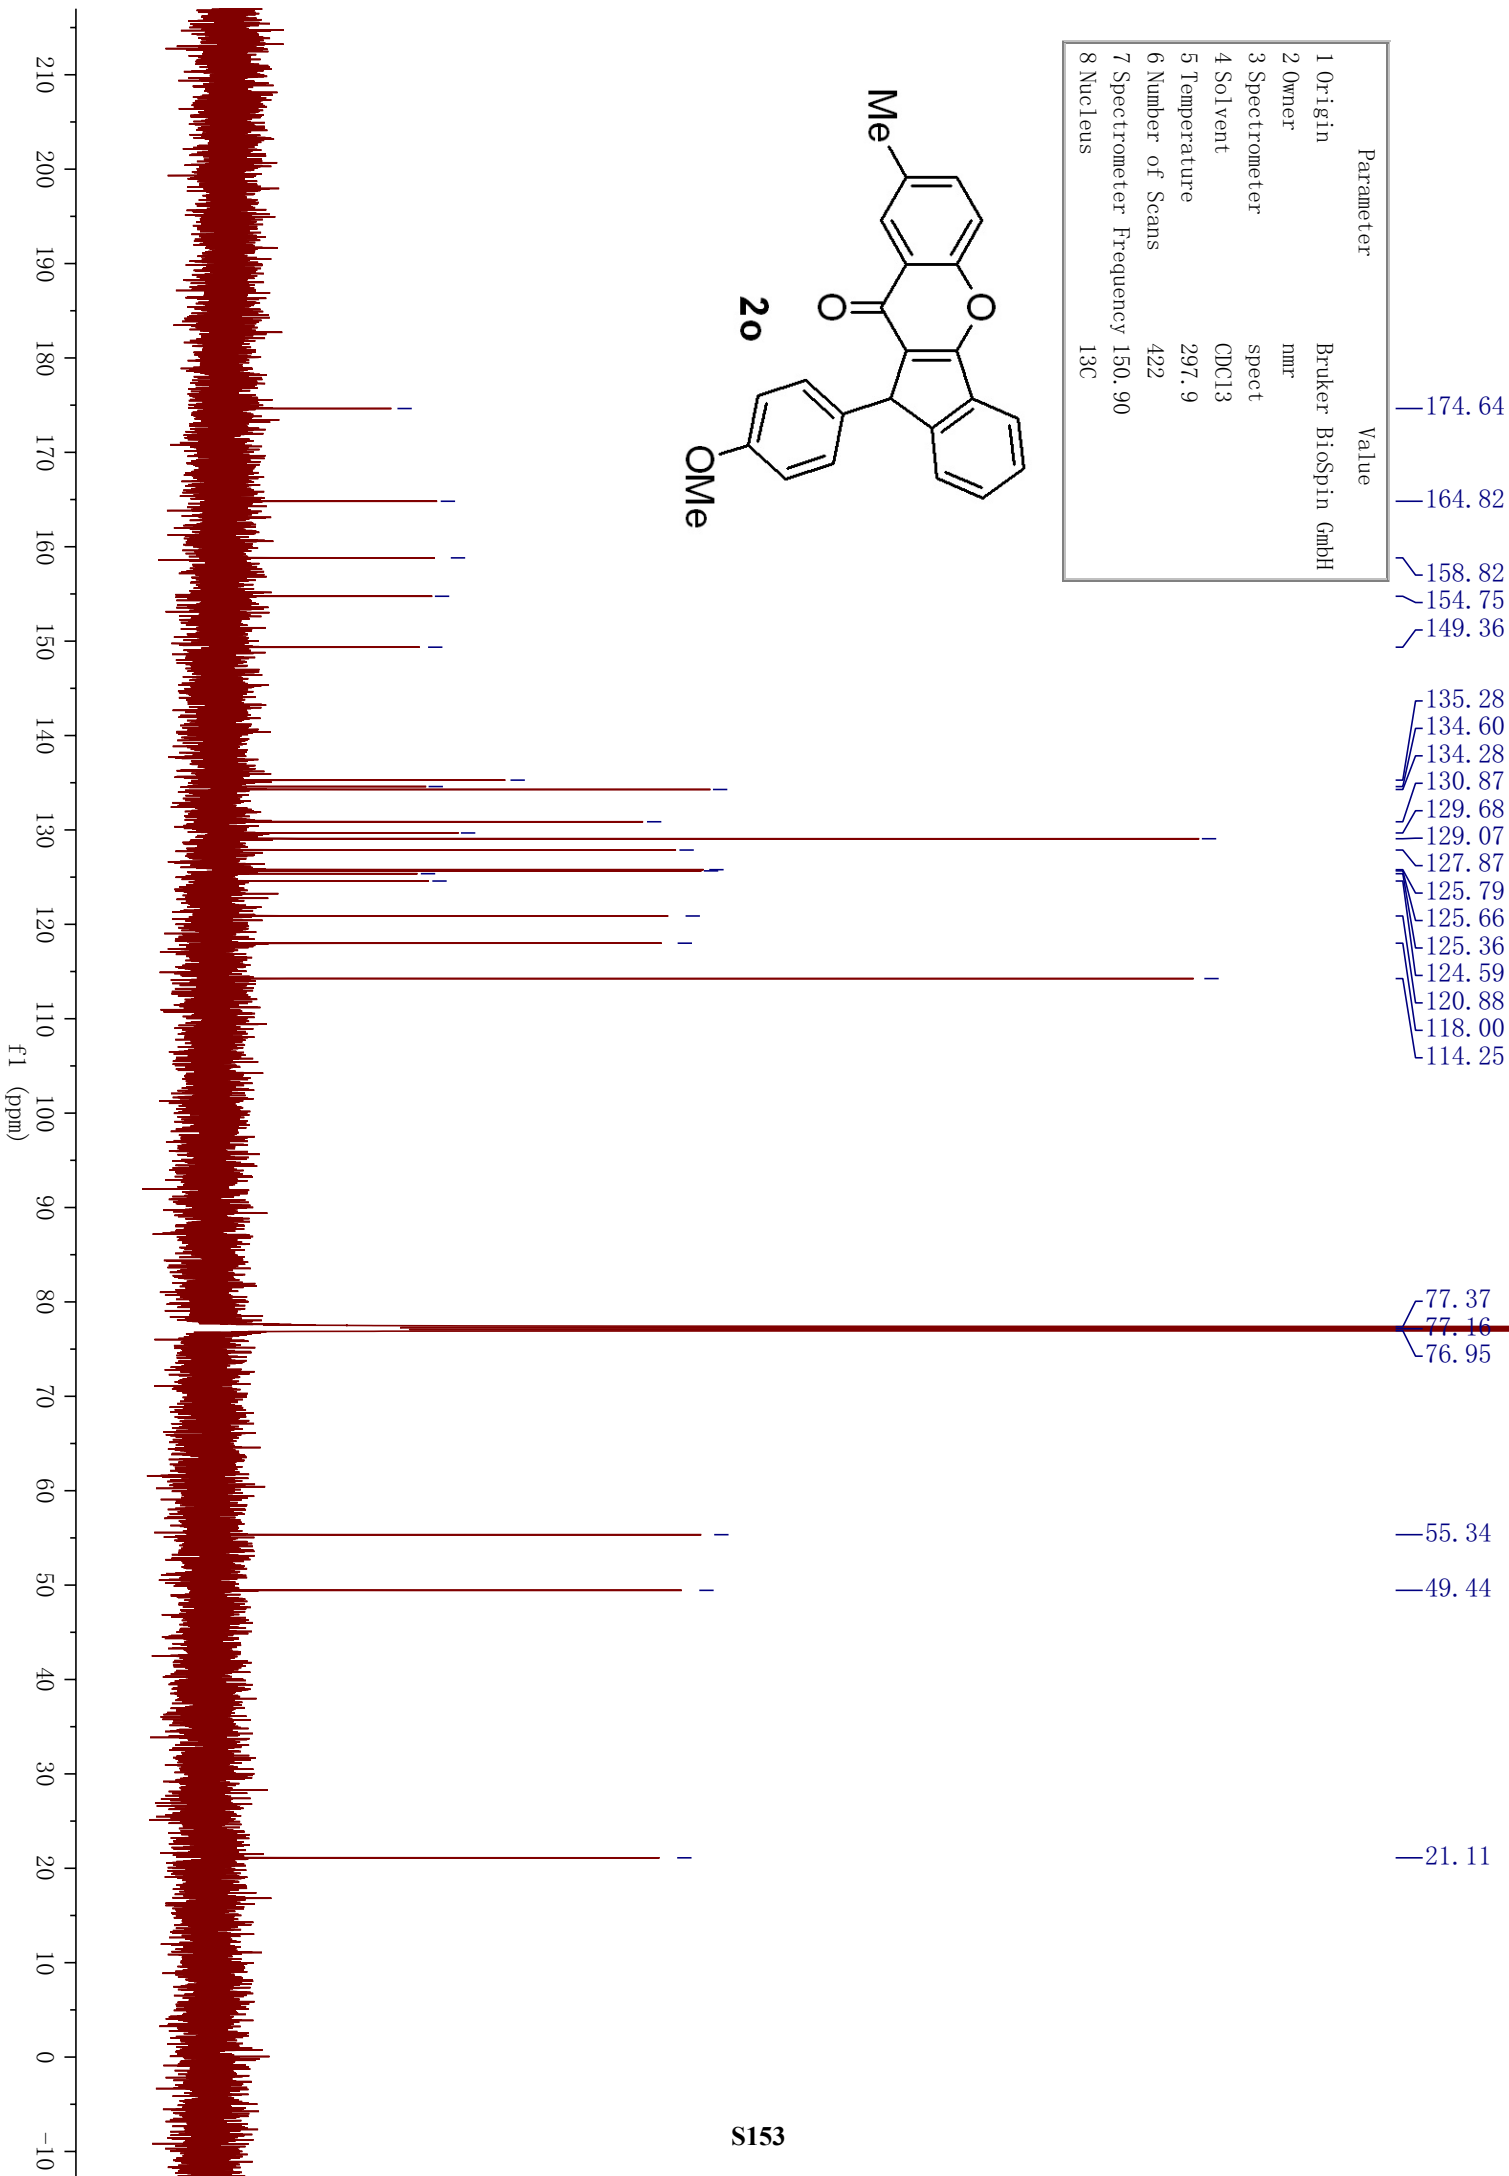

| Parameter                | Value |
|--------------------------|-------|
| 1 Origin                 | 7.88  |
| 2 Owner                  | 7.88  |
| 3 Spectrometer           | 7.87  |
| 4 Solvent                | 7.87  |
| 5 Temperature            | 7.47  |
| 6 Number of Scans        | 7.34  |
| 7 Spectrometer Frequency | 7.26  |
| 8 Nucleus                | 7.14  |
|                          | 6.80  |
|                          | 6.79  |
|                          | 5.12  |
|                          | 3.75  |
|                          | 2.62  |
|                          | 2.41  |

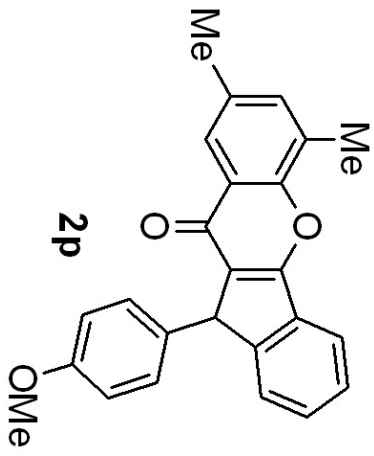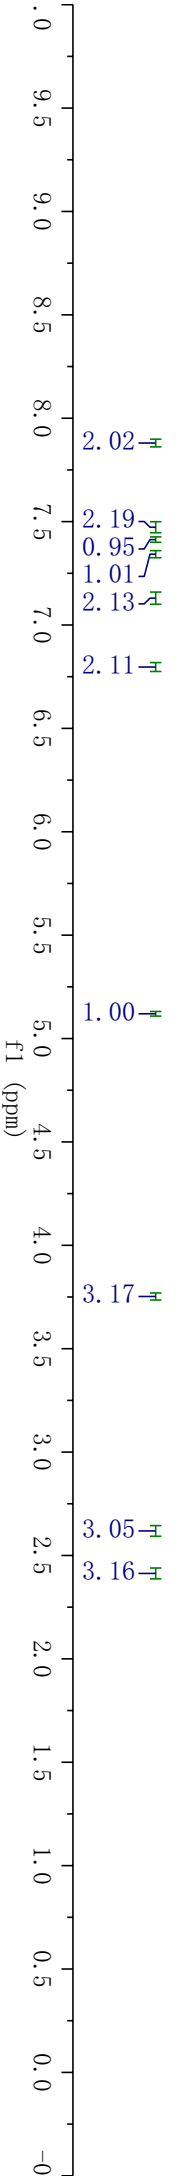

| Parameter                | Value                |
|--------------------------|----------------------|
| 1 Origin                 | Brucker Biospin GmbH |
| 2 Owner                  | nmr                  |
| 3 Spectrometer           | spect                |
| 4 Solvent                | CDCl3                |
| 5 Temperature            | 297.9                |
| 6 Number of Scans        | 217                  |
| 7 Spectrometer Frequency | 150.90               |
| 8 Nucleus                | <sup>13</sup> C      |

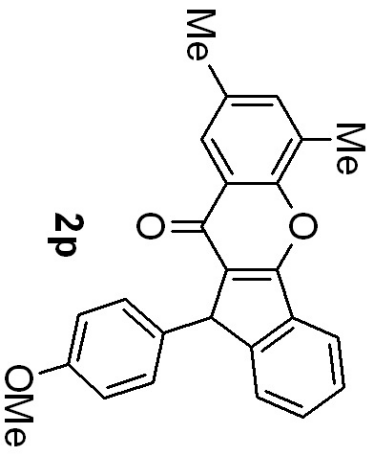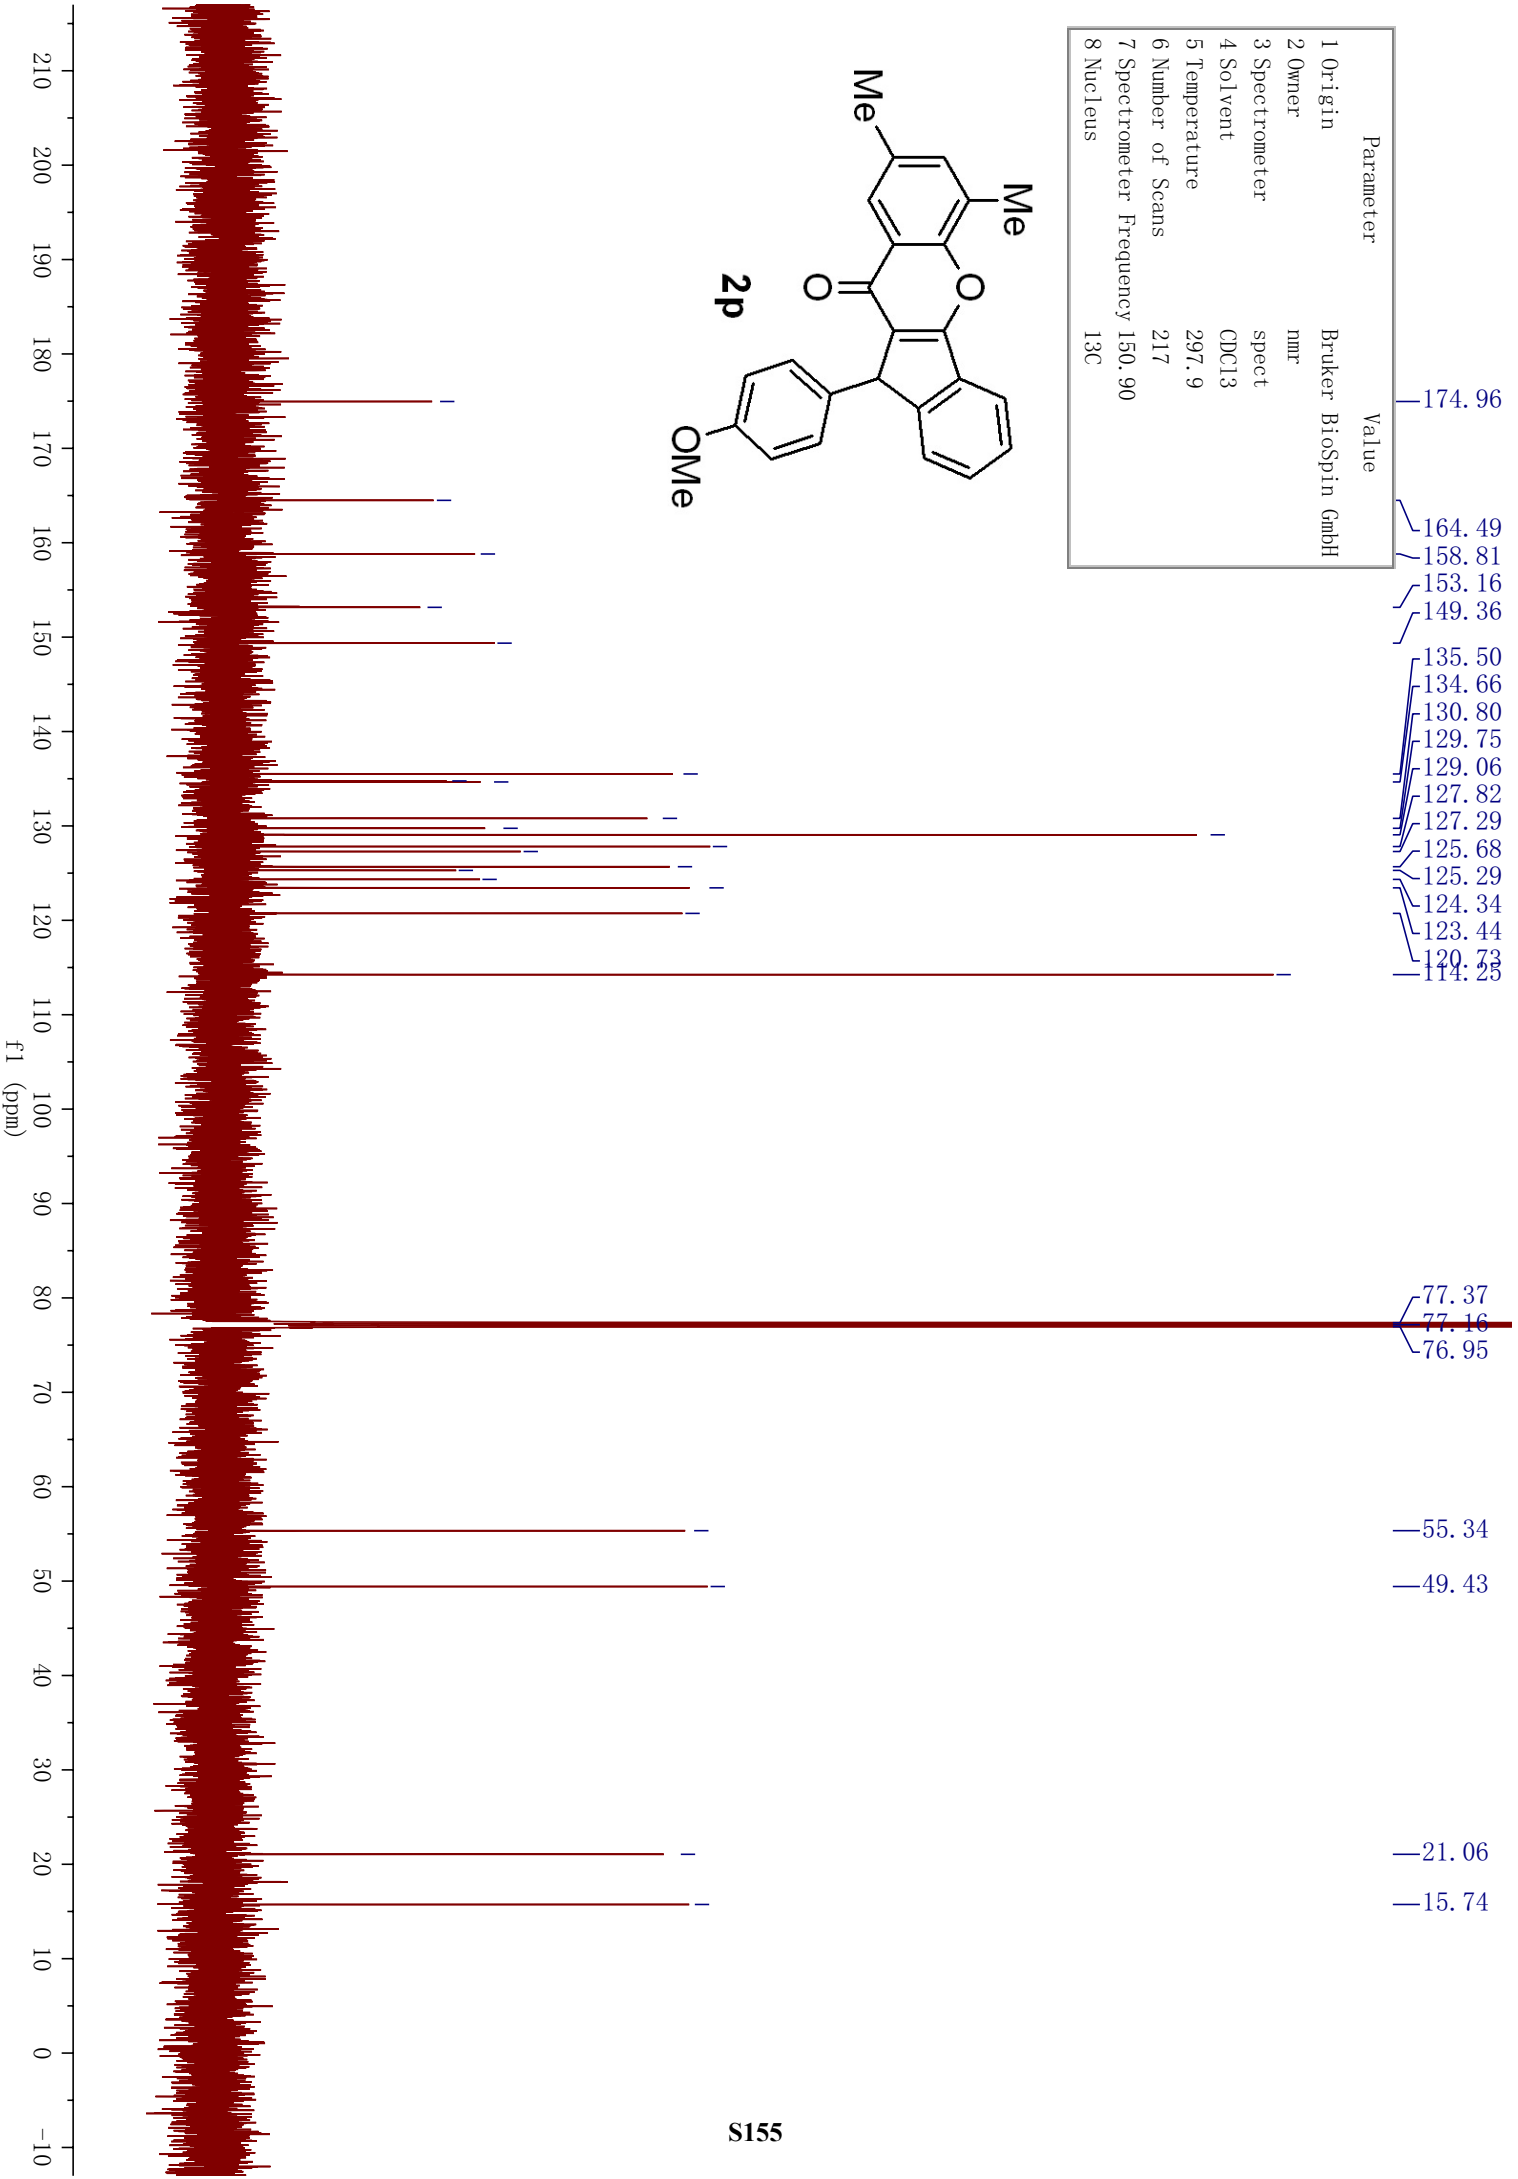



| Parameter                | Value                |
|--------------------------|----------------------|
| 1 Origin                 | Brucker Biospin GmbH |
| 2 Owner                  | nmr                  |
| 3 Spectrometer           | spect                |
| 4 Solvent                | CDCl3                |
| 5 Temperature            | 297.9                |
| 6 Number of Scans        | 16                   |
| 7 Spectrometer Frequency | 600.13               |
| 8 Nucleus                | 1H                   |

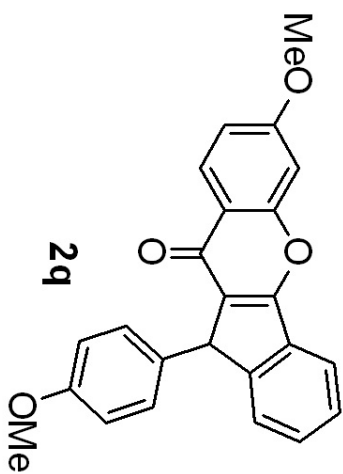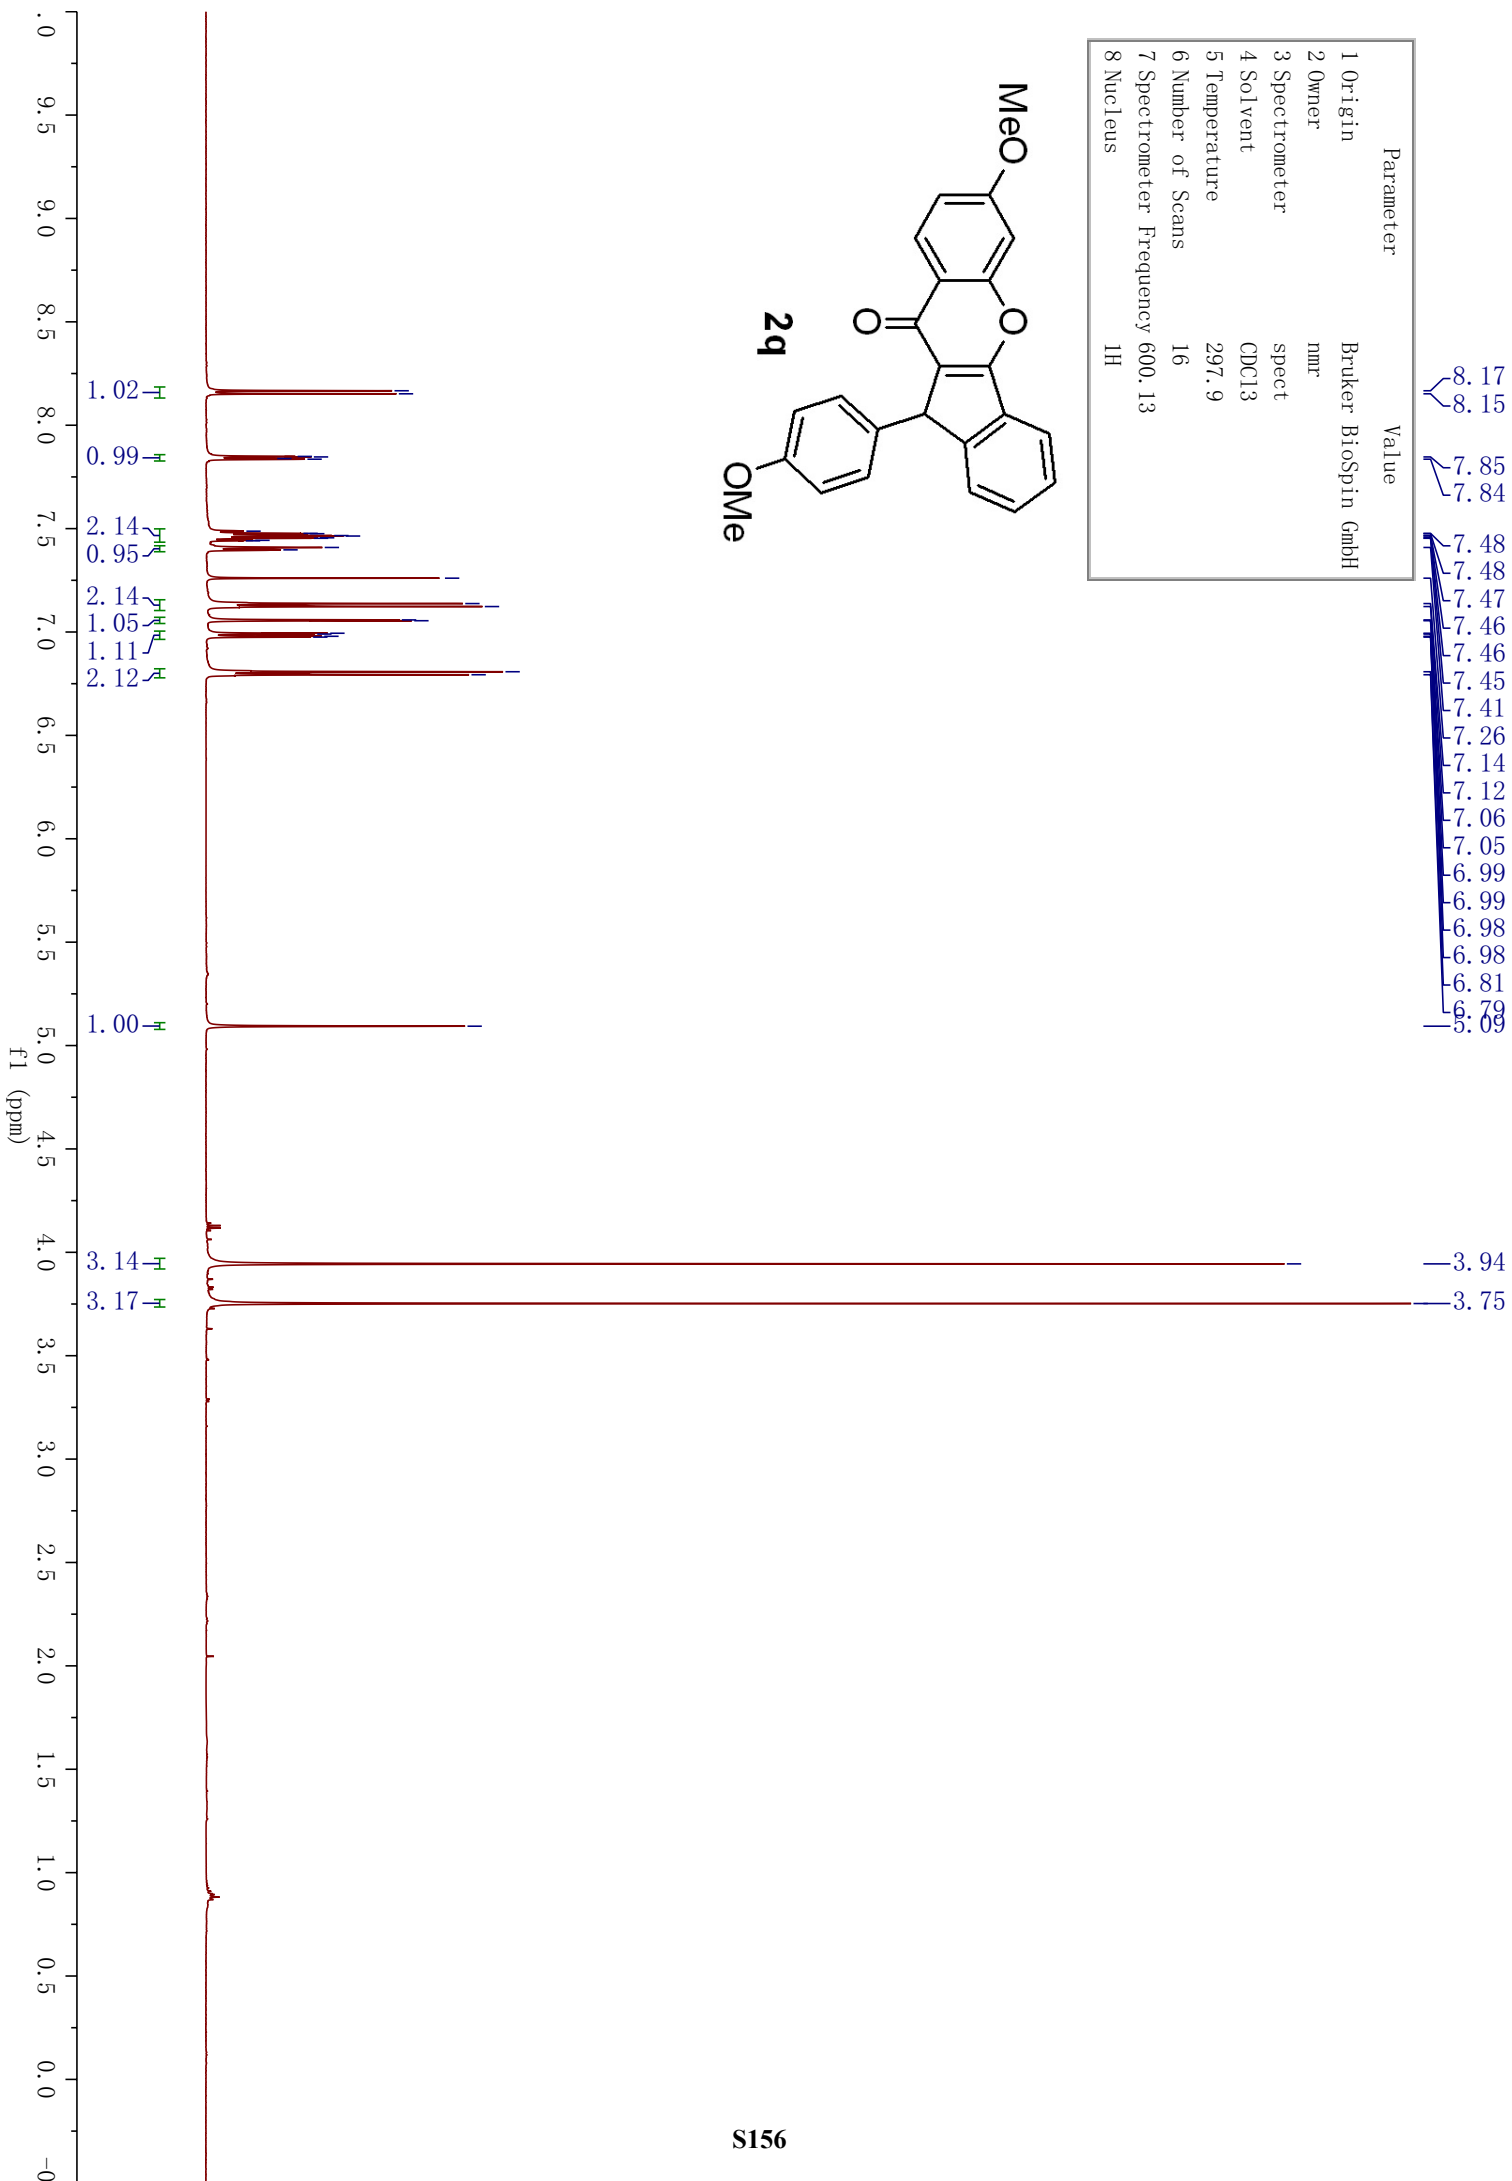

| Parameter                | Value                |
|--------------------------|----------------------|
| 1 Origin                 | Brucker Biospin GmbH |
| 2 Owner                  | nmr                  |
| 3 Spectrometer           | spect                |
| 4 Solvent                | CDCl3                |
| 5 Temperature            | 298.1                |
| 6 Number of Scans        | 193                  |
| 7 Spectrometer Frequency | 150.90               |
| 8 Nucleus                | <sup>13</sup> C      |

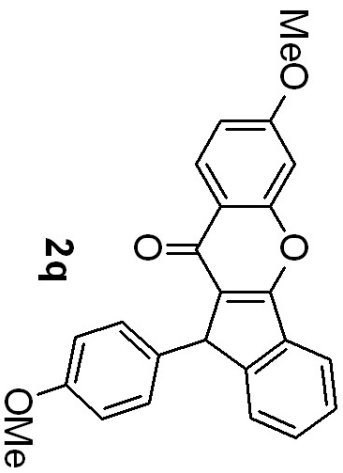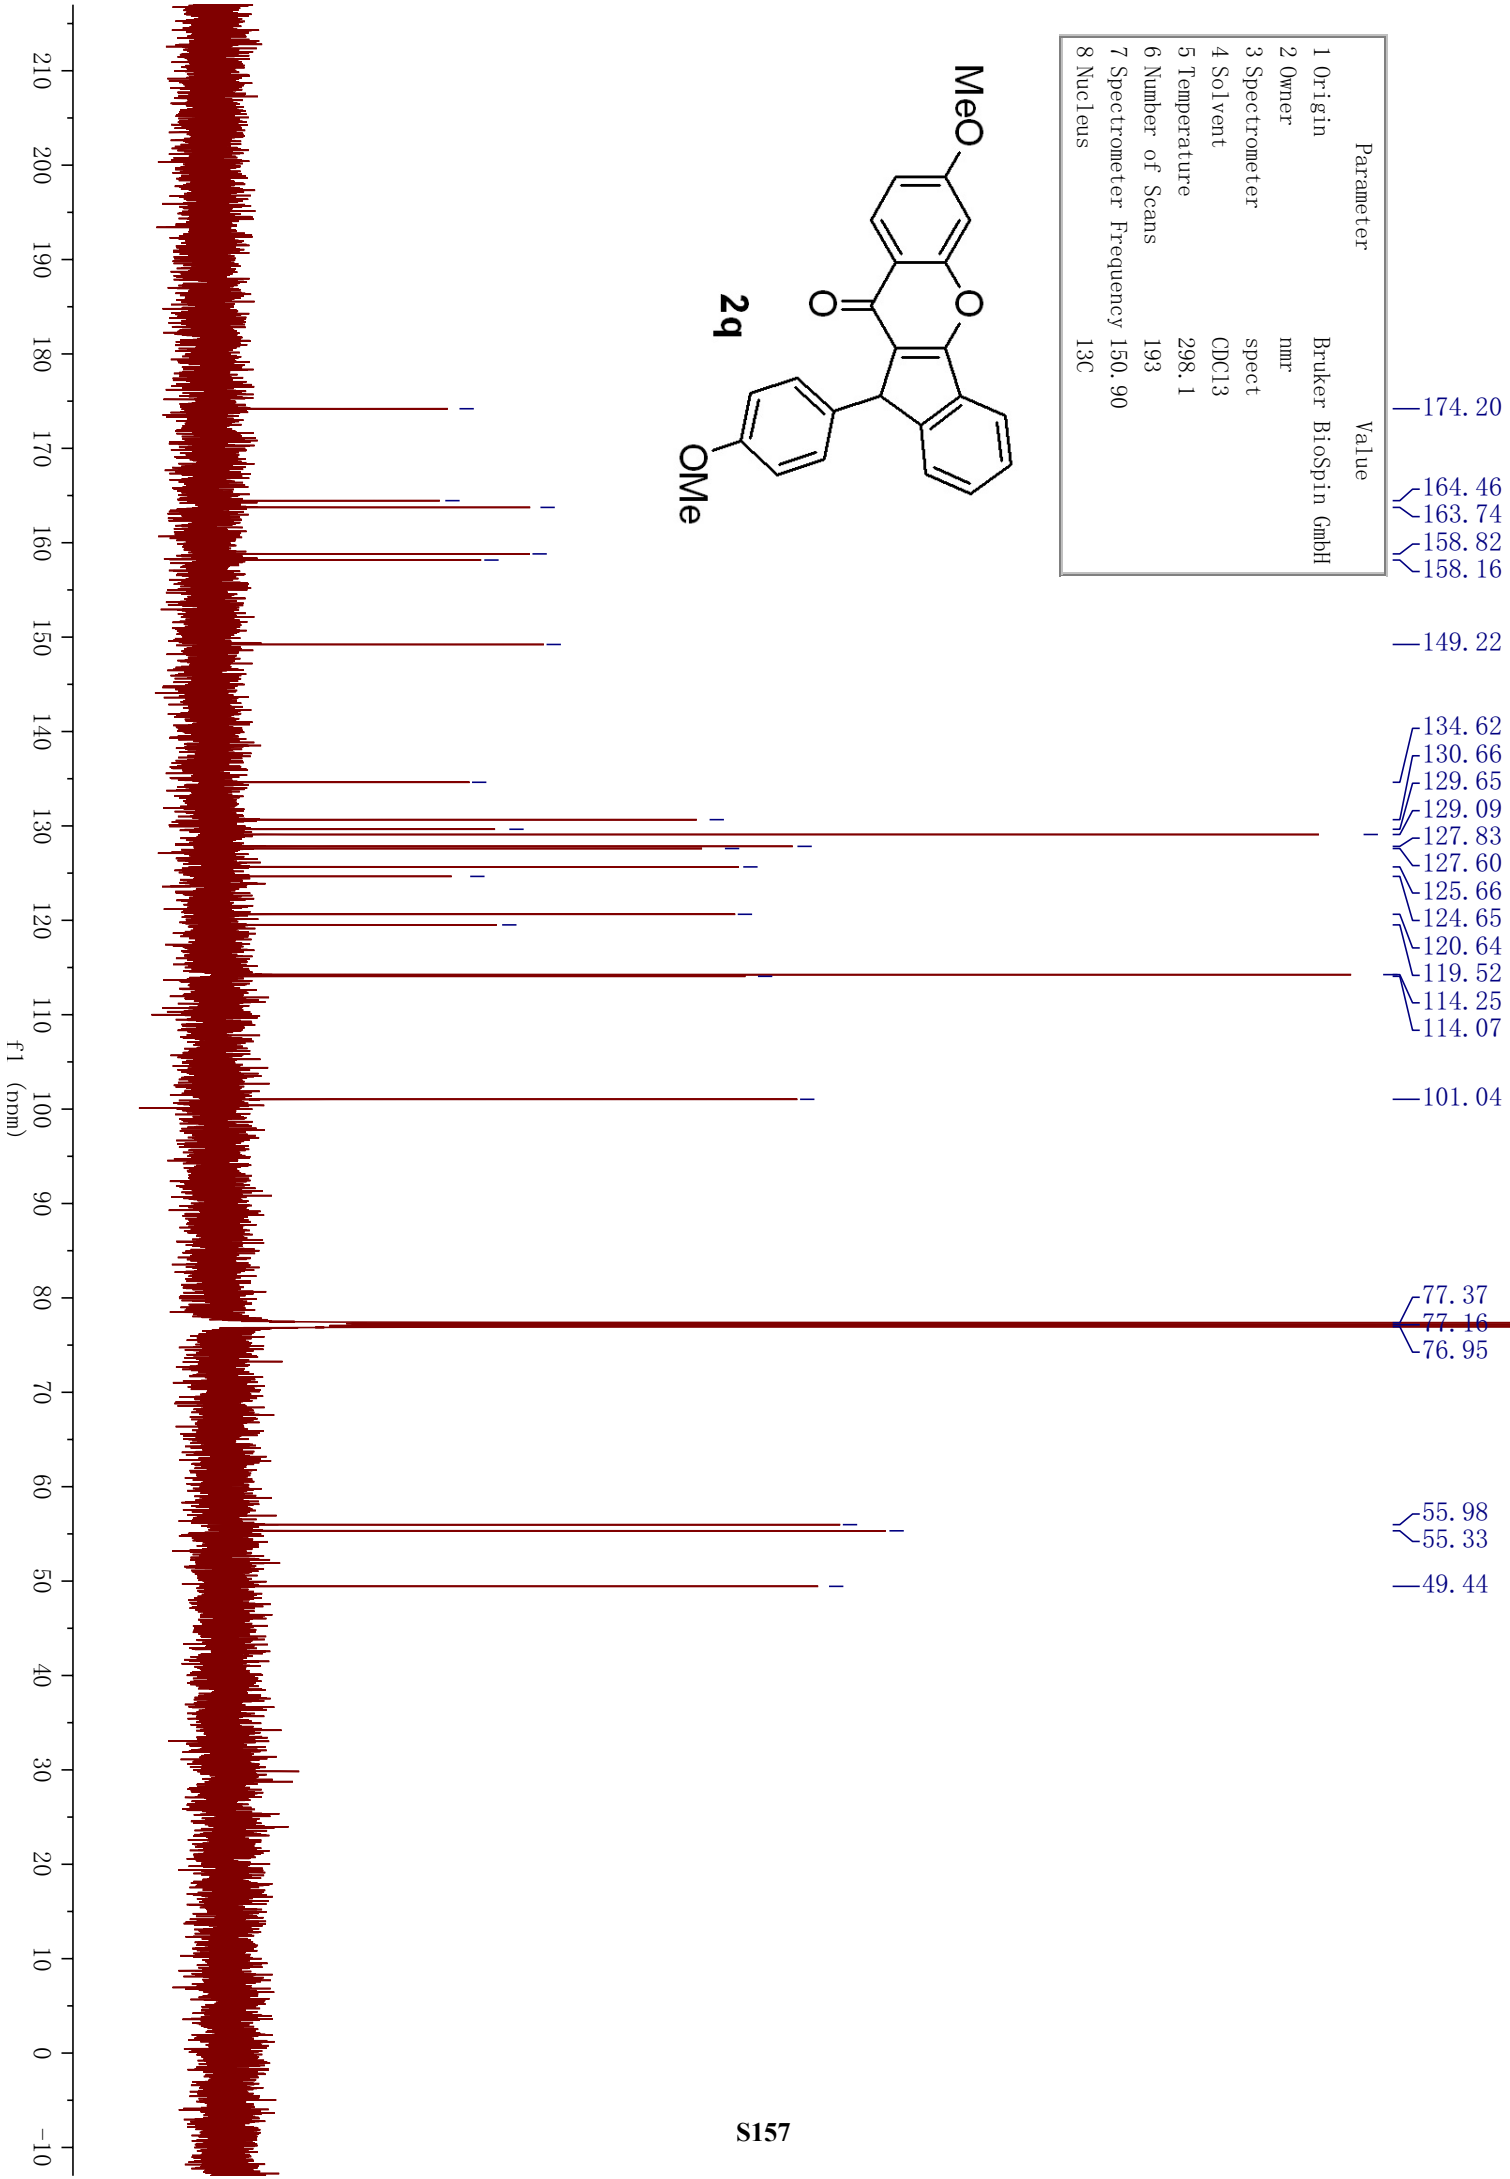

| Parameter                | Value                |
|--------------------------|----------------------|
| 1 Origin                 | Brucker Biospin GmbH |
| 2 Owner                  | nmr                  |
| 3 Spectrometer           | spect                |
| 4 Solvent                | CDCl3                |
| 5 Temperature            | 297.9                |
| 6 Number of Scans        | 16                   |
| 7 Spectrometer Frequency | 600.13               |
| 8 Nucleus                | <sup>1</sup> H       |

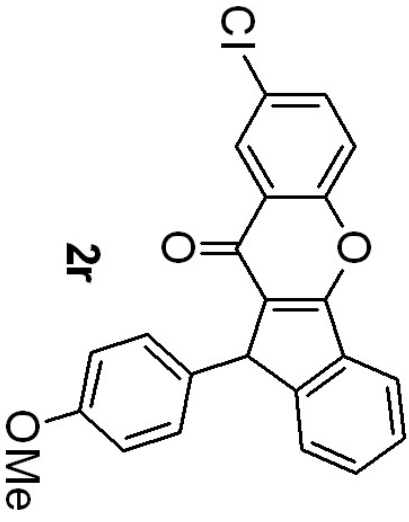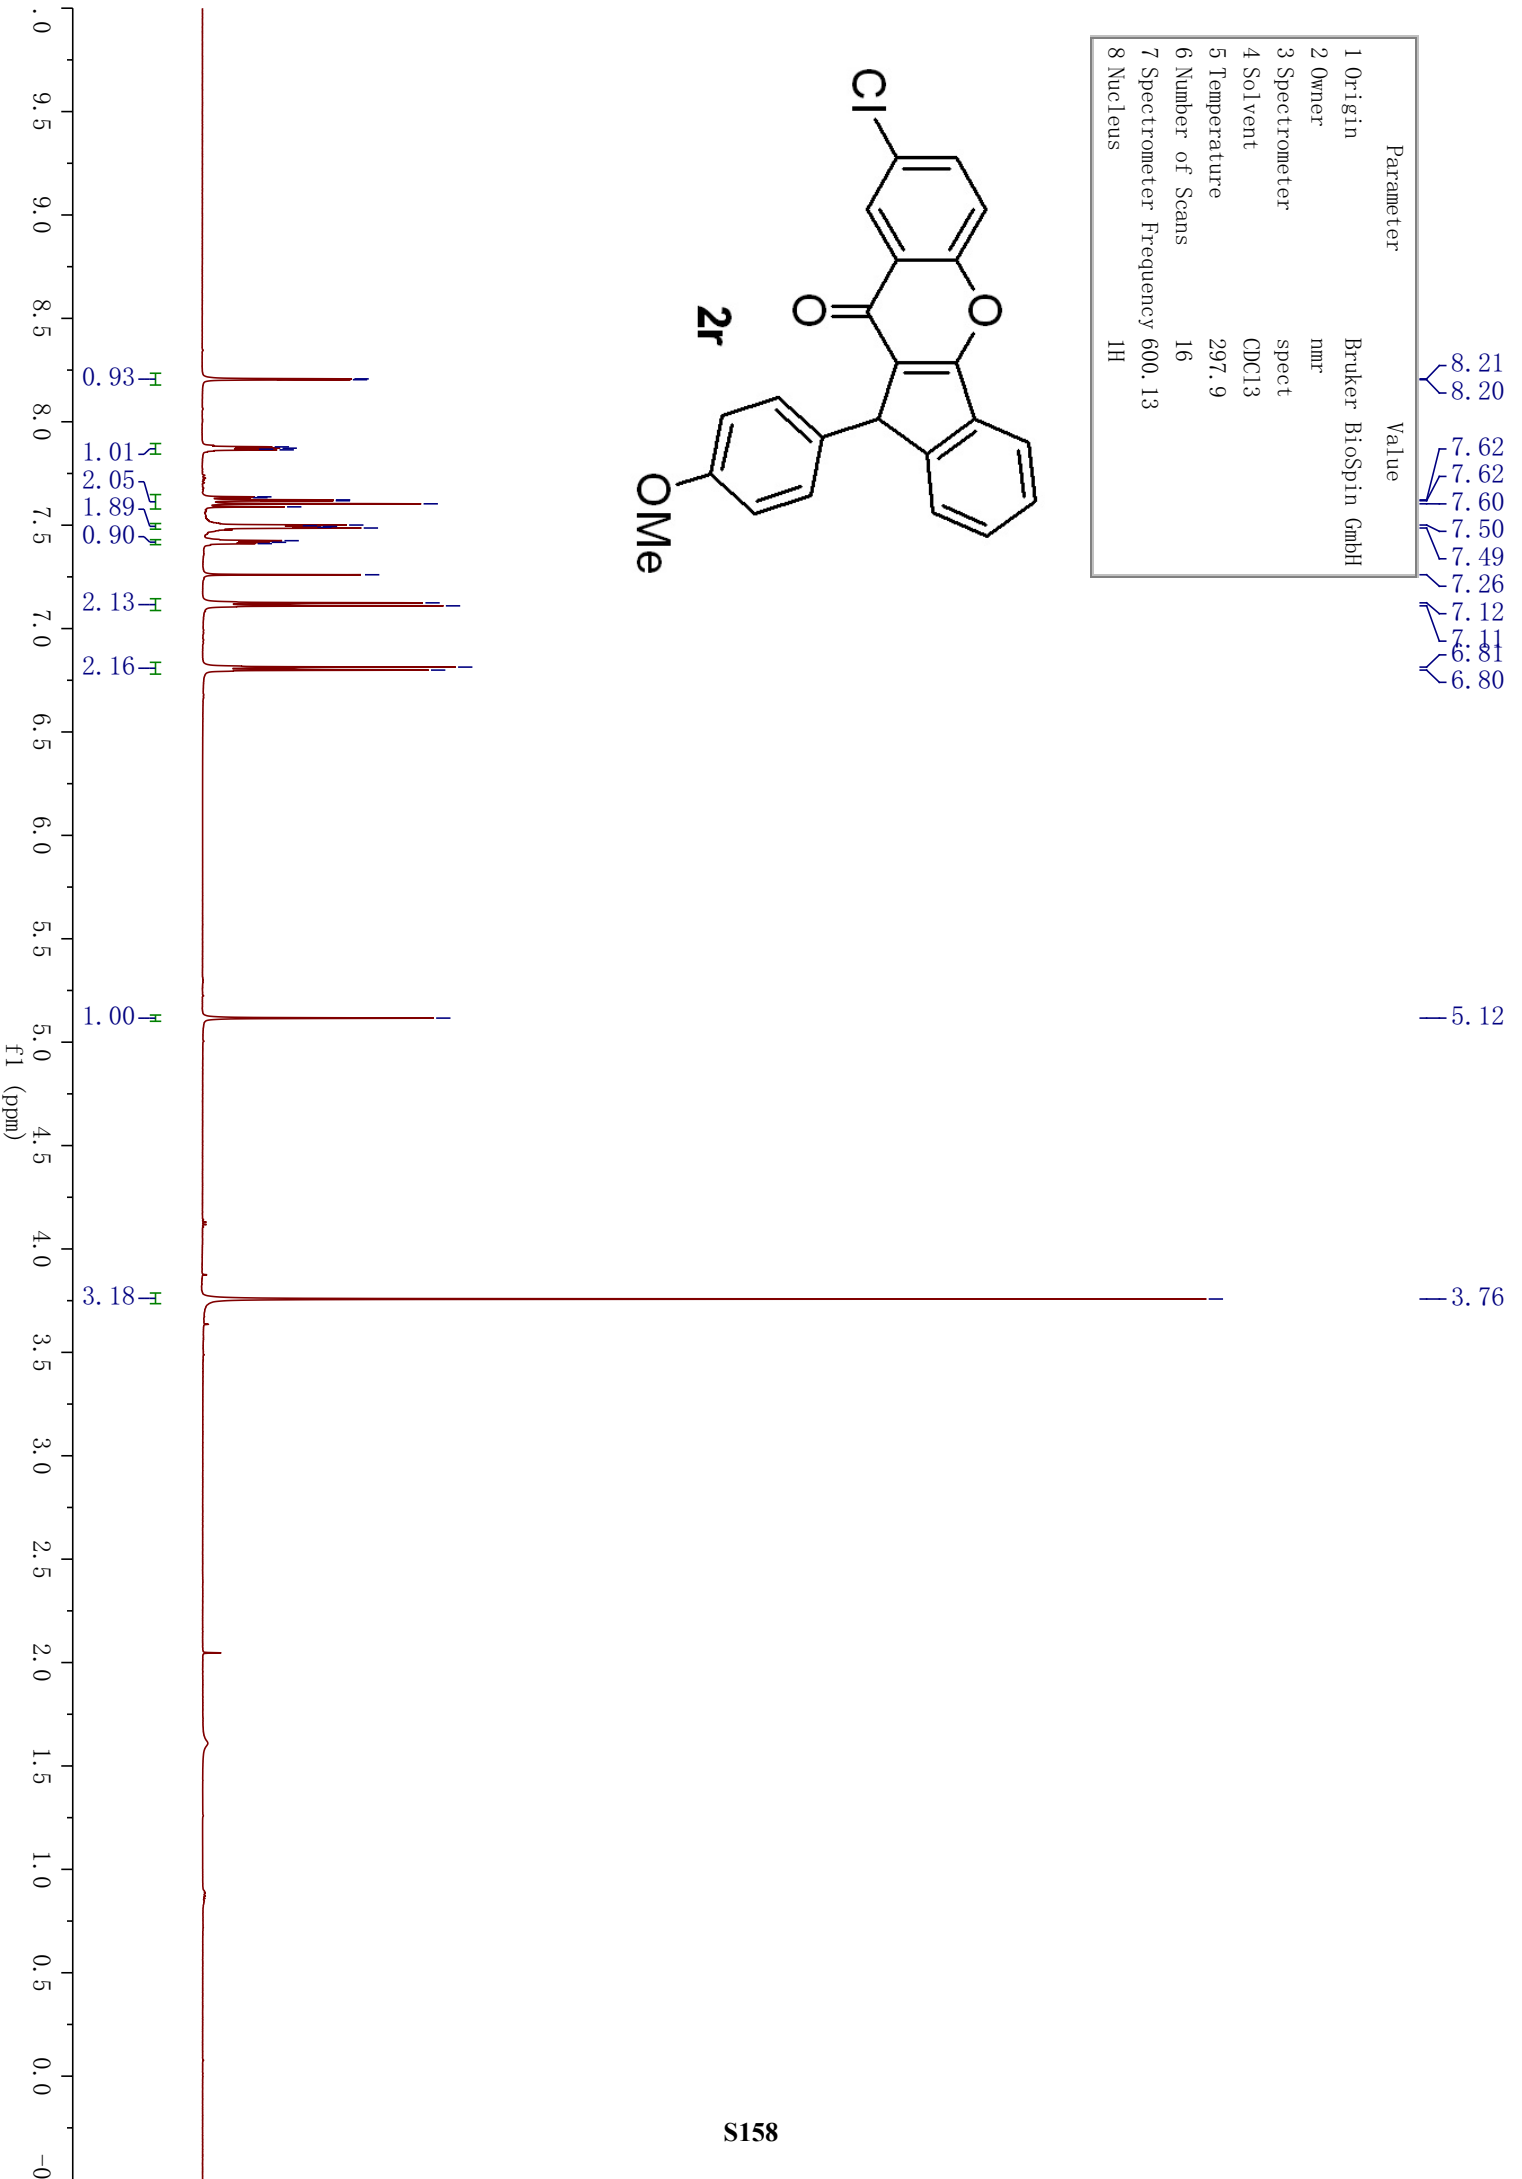

| Parameter                | Value                |
|--------------------------|----------------------|
| 1 Origin                 | Brucker BioSpin GmbH |
| 2 Owner                  | nmr                  |
| 3 Spectrometer           | spect                |
| 4 Solvent                | CDCl3                |
| 5 Temperature            | 297.9                |
| 6 Number of Scans        | 297                  |
| 7 Spectrometer Frequency | 150.90               |
| 8 Nucleus                | <sup>13</sup> C      |

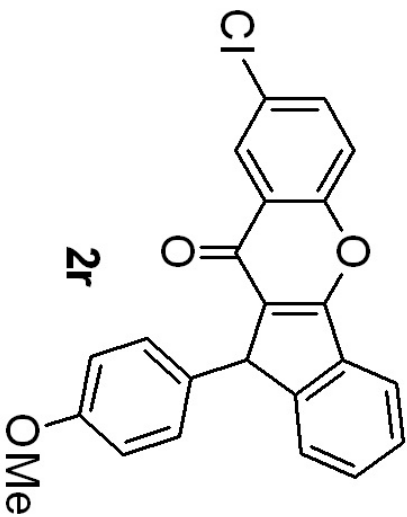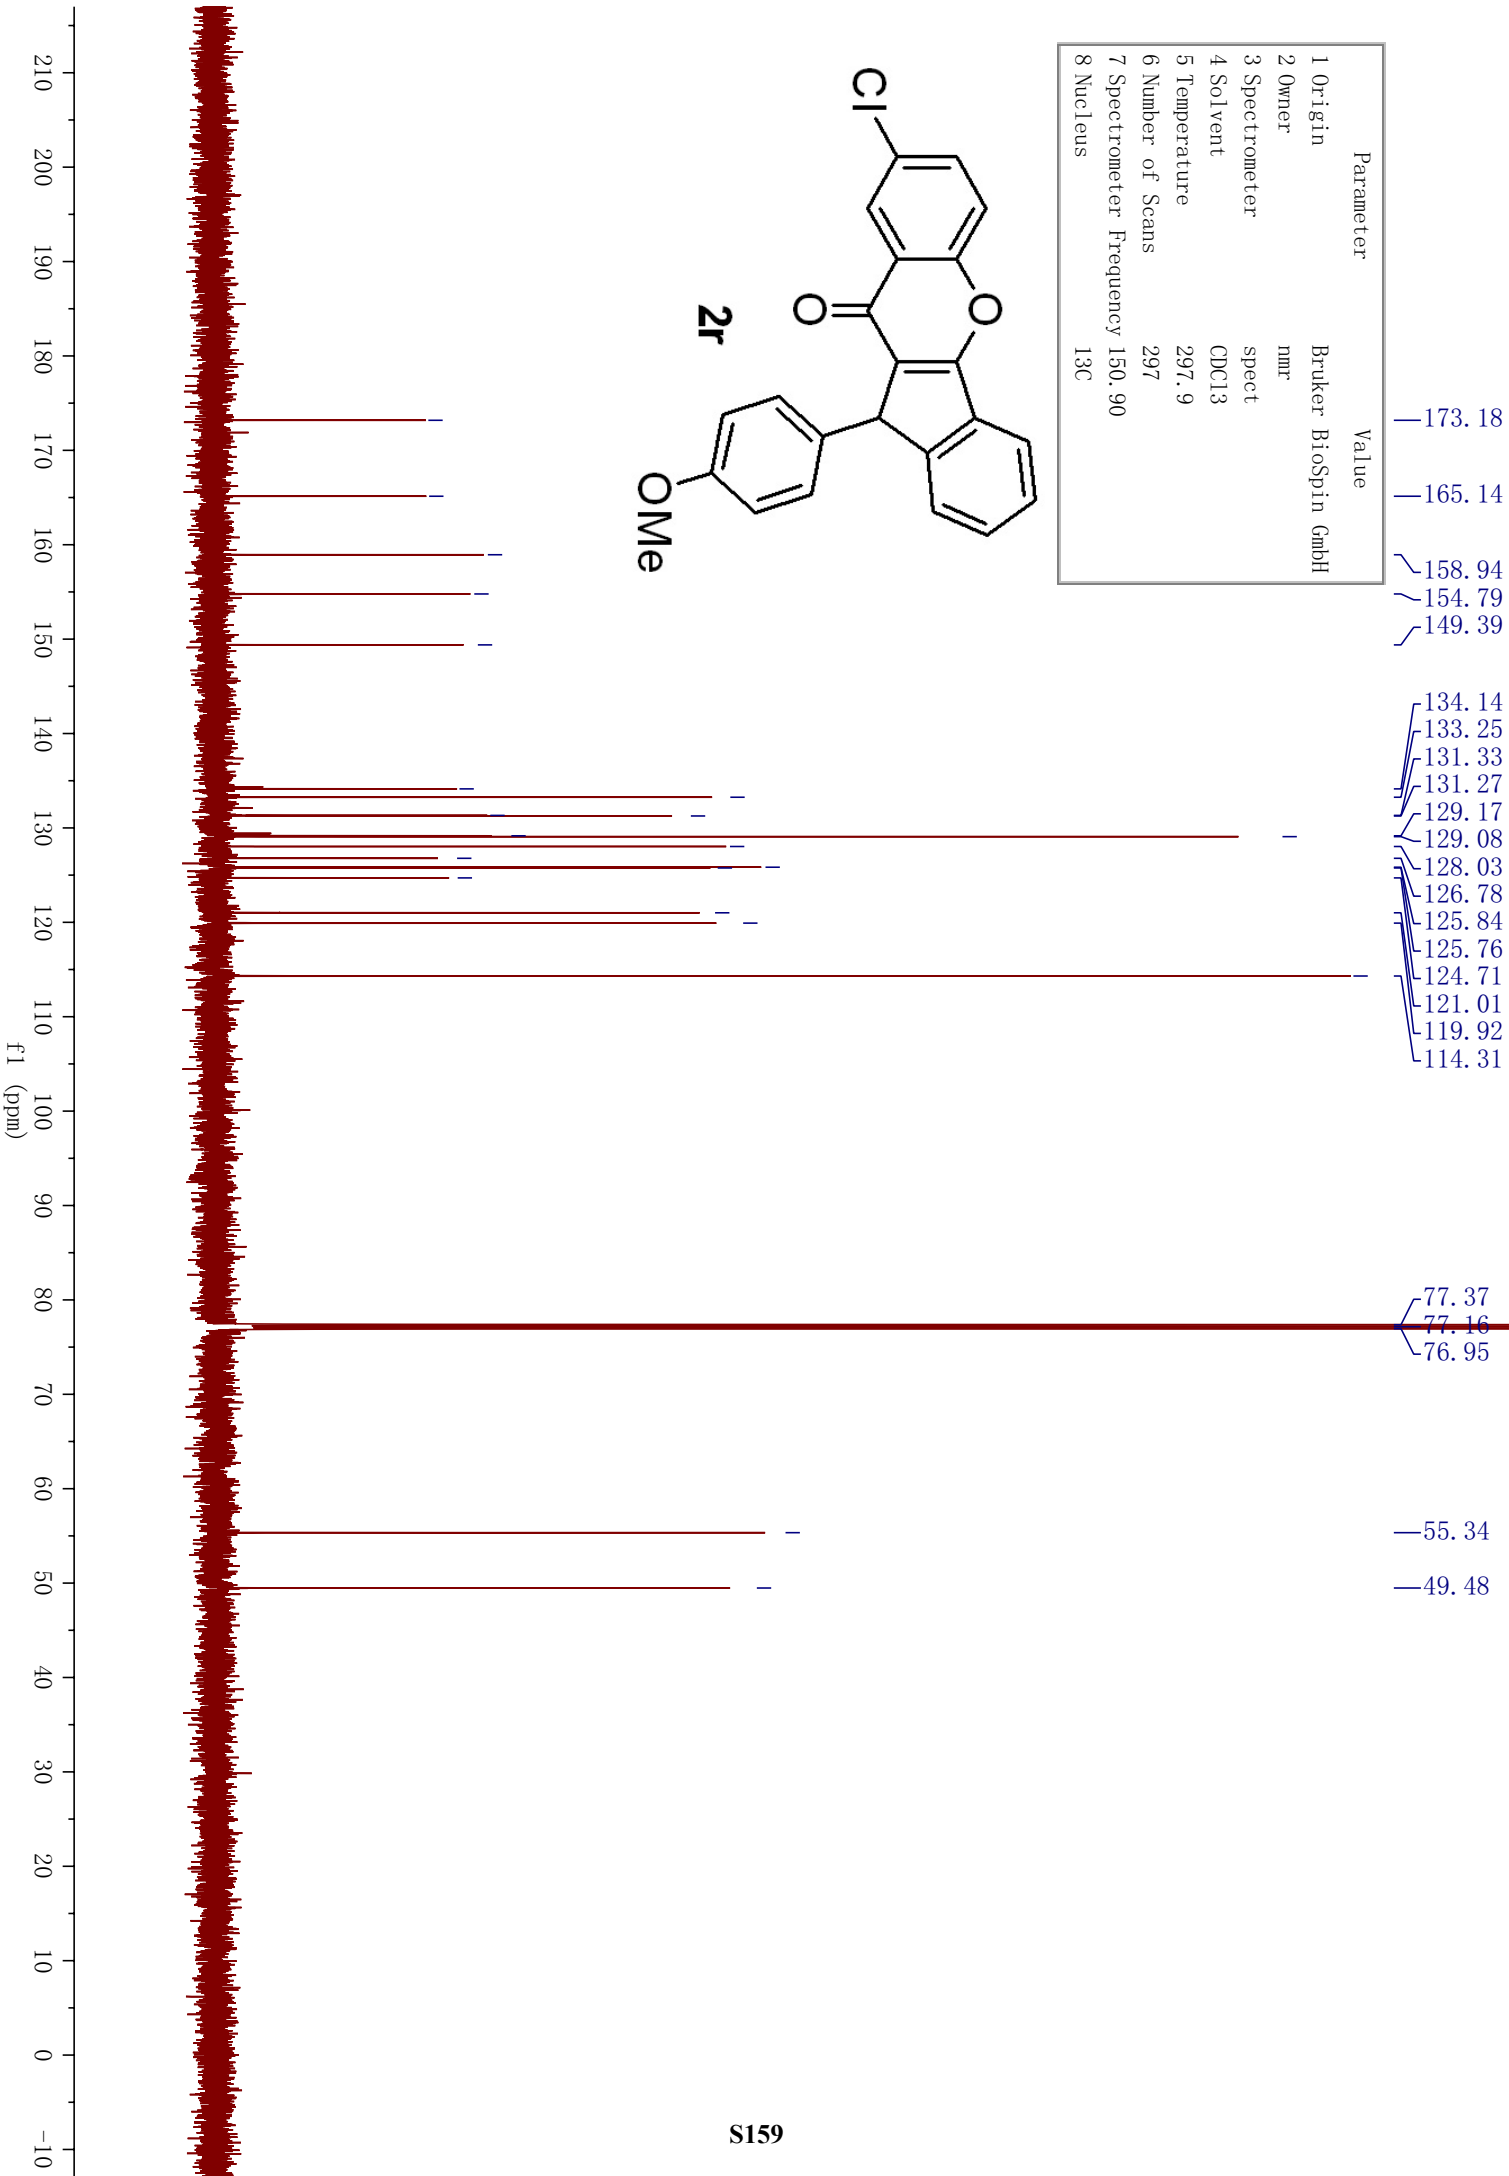

| Parameter                | Value                |
|--------------------------|----------------------|
| 1 Origin                 | Brucker Biospin GmbH |
| 2 Owner                  | nmr                  |
| 3 Spectrometer           | spect                |
| 4 Solvent                | CDCl3                |
| 5 Temperature            | 297.9                |
| 6 Number of Scans        | 16                   |
| 7 Spectrometer Frequency | 600.13               |
| 8 Nucleus                | <sup>1</sup> H       |

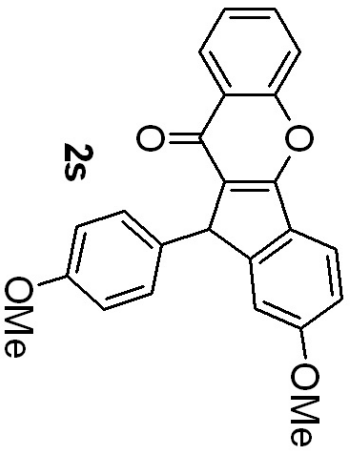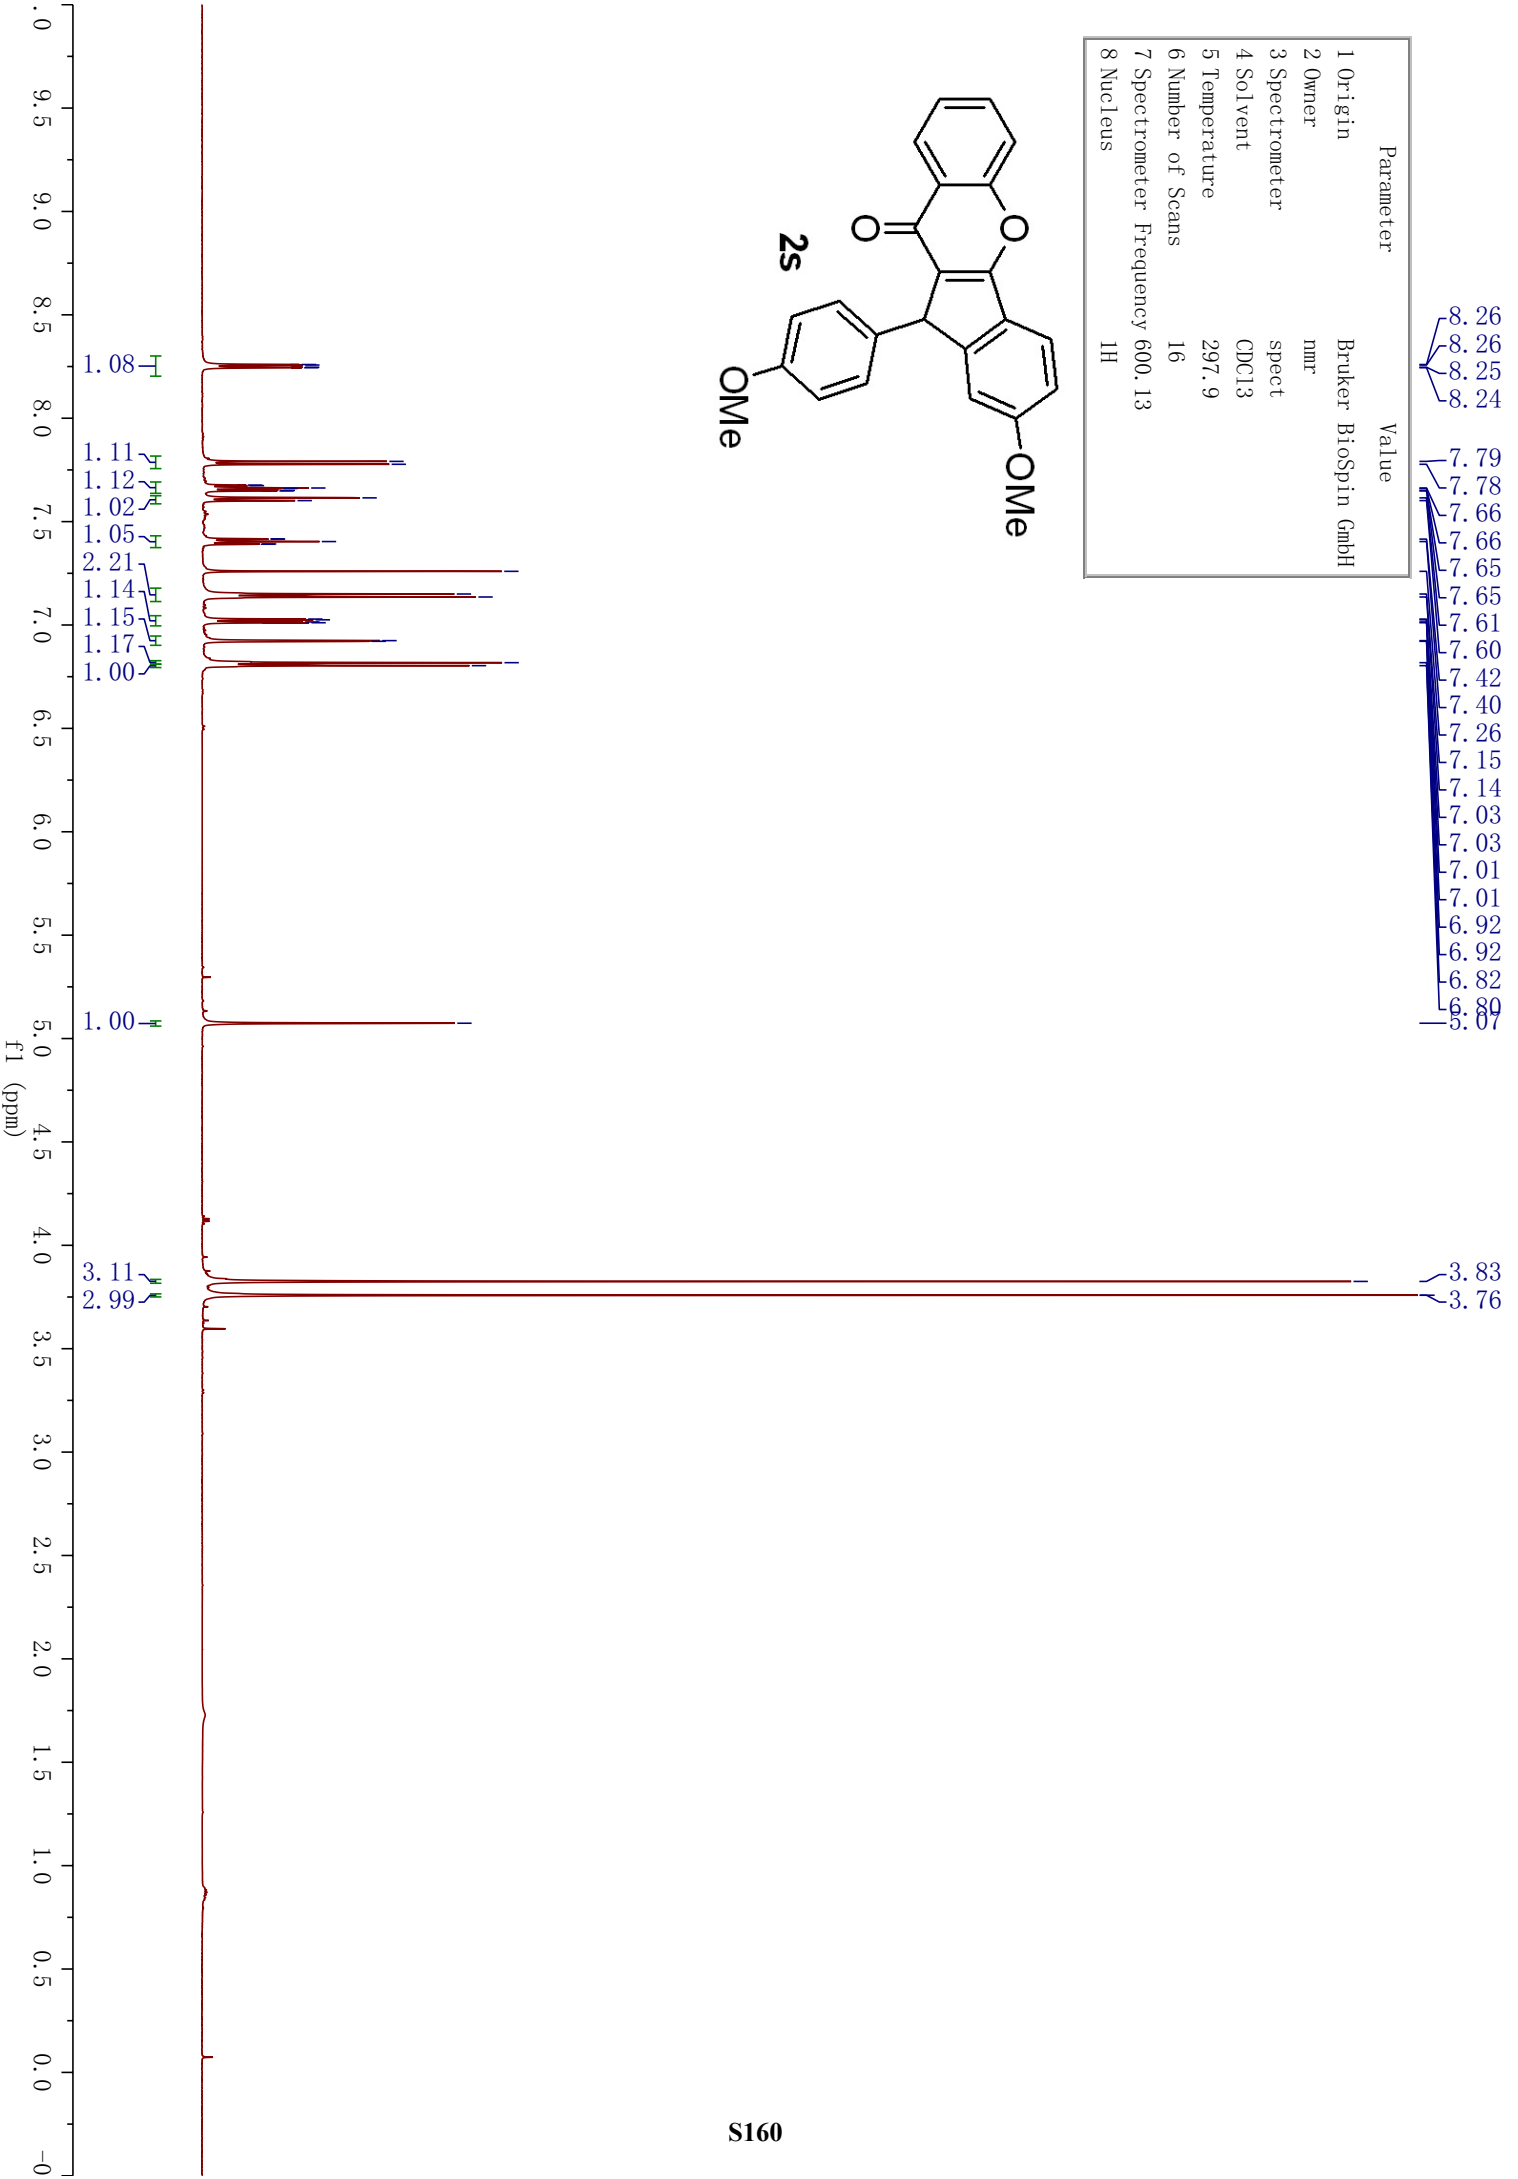

| Parameter                | Value  |
|--------------------------|--------|
| 1 Origin                 | 173.95 |
| 2 Owner                  | 165.12 |
| 3 Spectrometer           | 162.73 |
| 4 Solvent                | 158.84 |
| 5 Temperature            | 156.39 |
| 6 Number of Scans        | 152.00 |
| 7 Spectrometer Frequency | 132.85 |
| 8 Nucleus                | 129.91 |

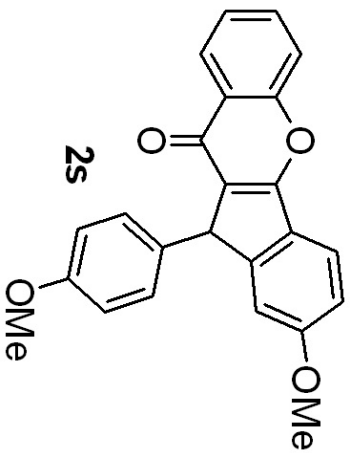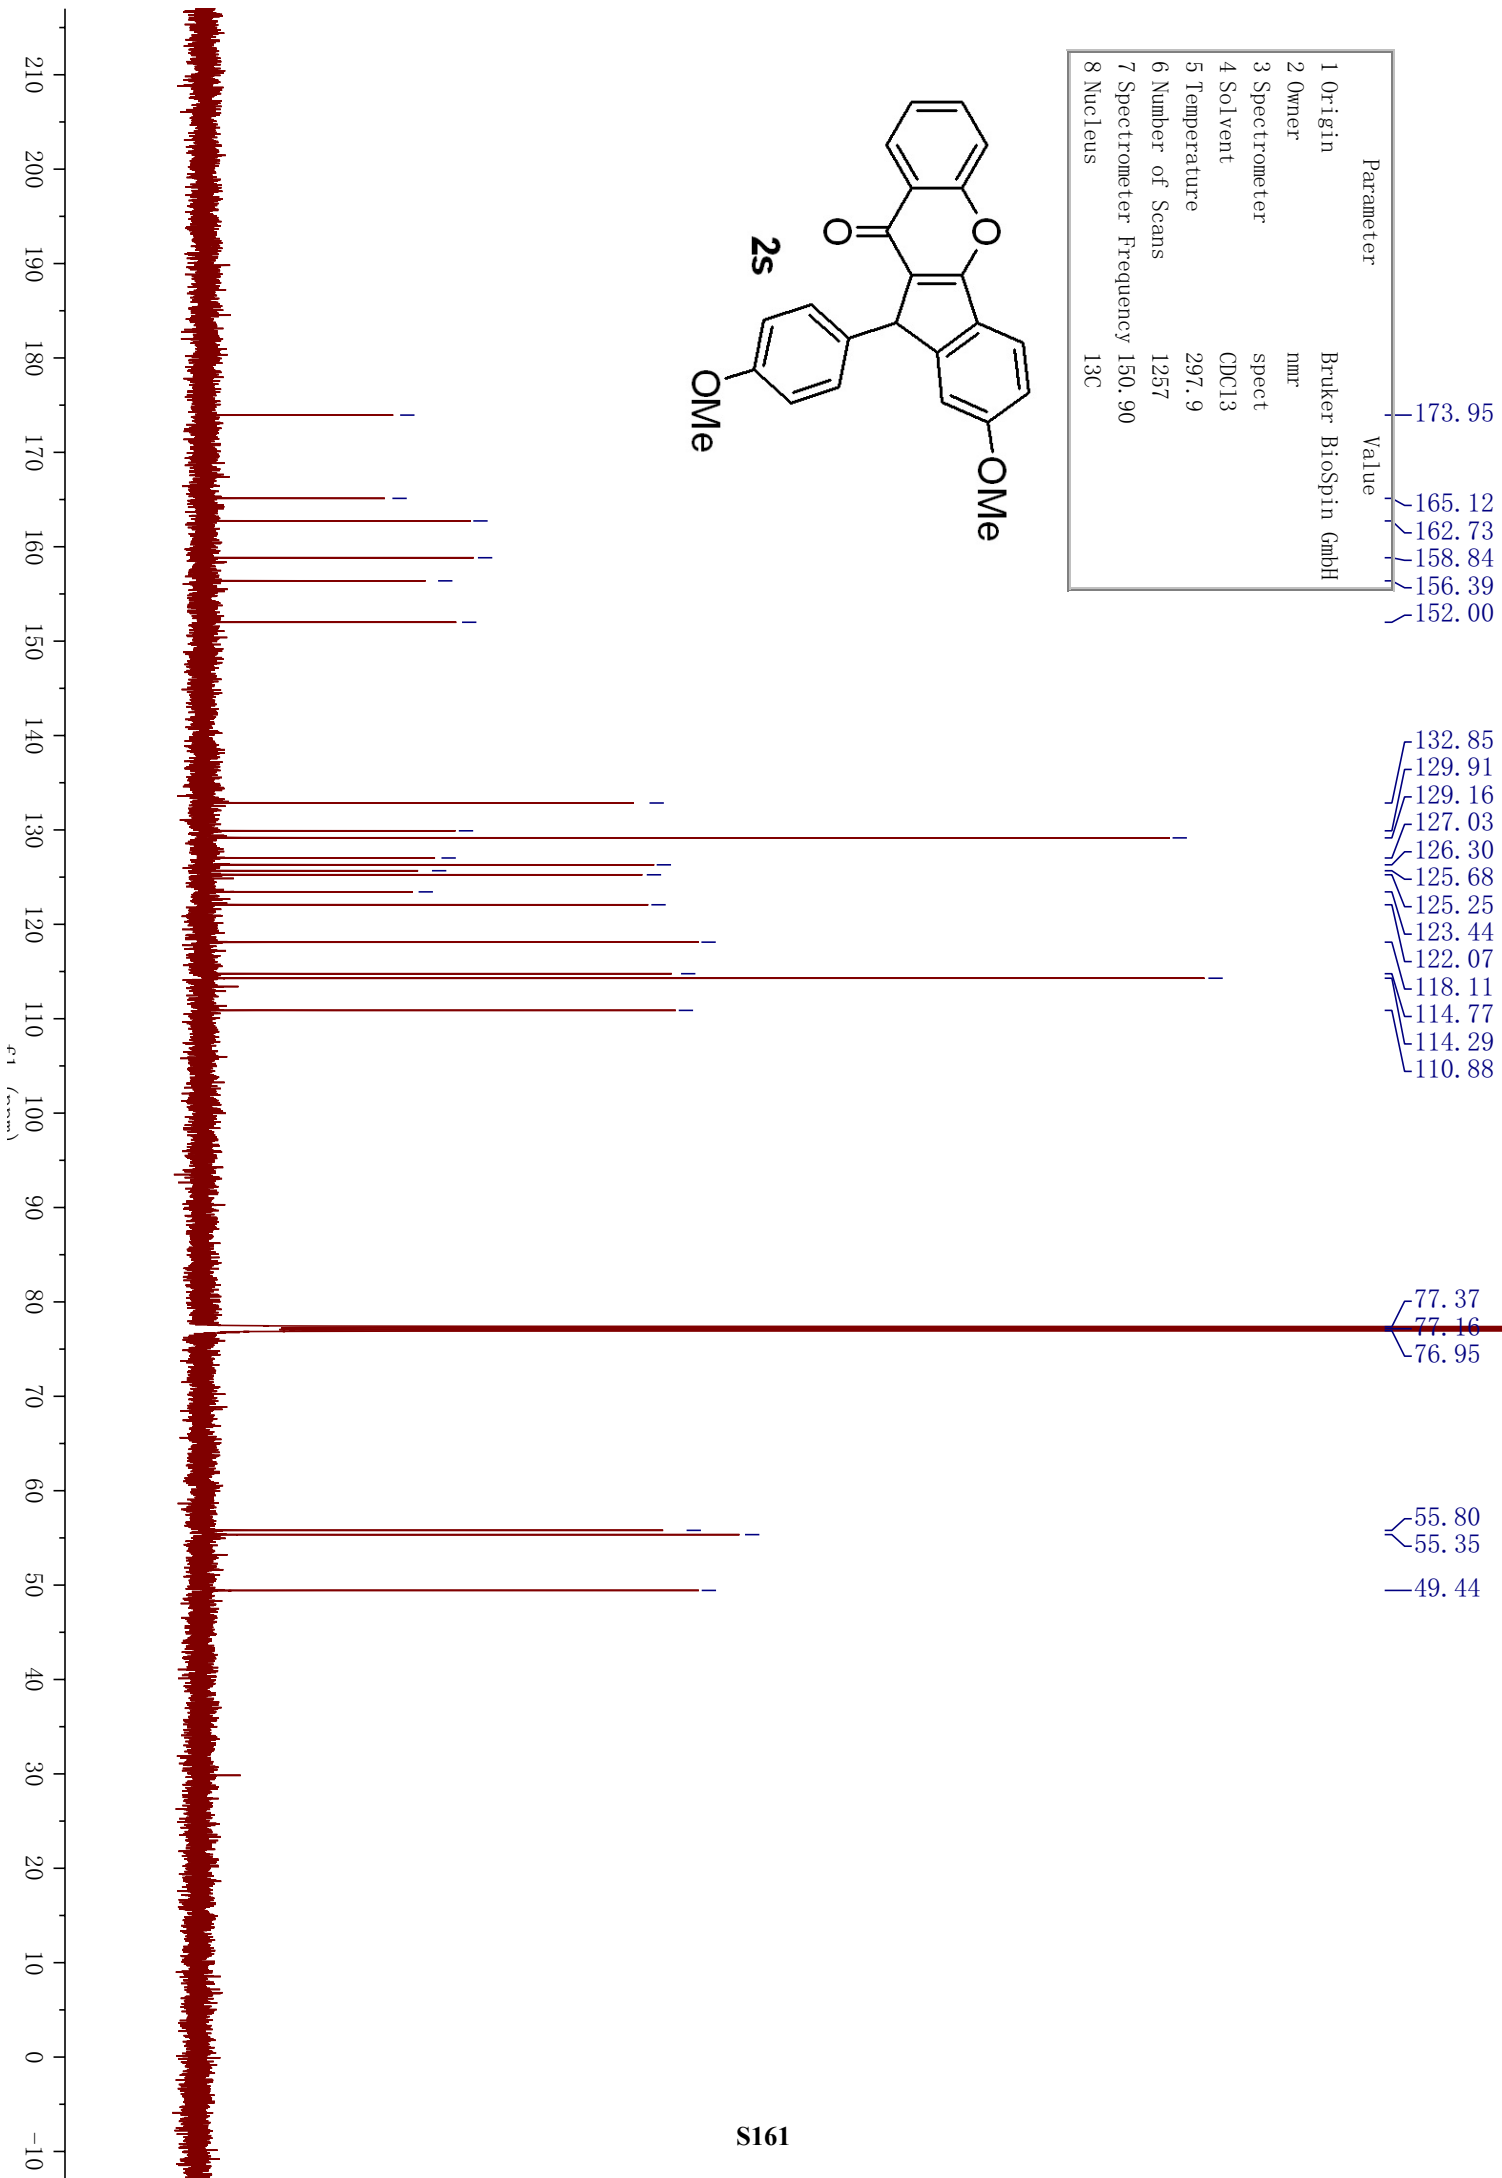

| Parameter                | Value               |
|--------------------------|---------------------|
| 1 Origin                 | Brüker Biospin GmbH |
| 2 Owner                  | nmr                 |
| 3 Spectrometer           | spect               |
| 4 Solvent                | CDCl3               |
| 5 Temperature            | 297.9               |
| 6 Number of Scans        | 16                  |
| 7 Spectrometer Frequency | 600.13              |
| 8 Nucleus                | <sup>1</sup> H      |

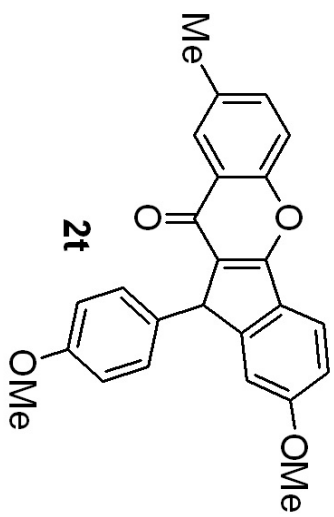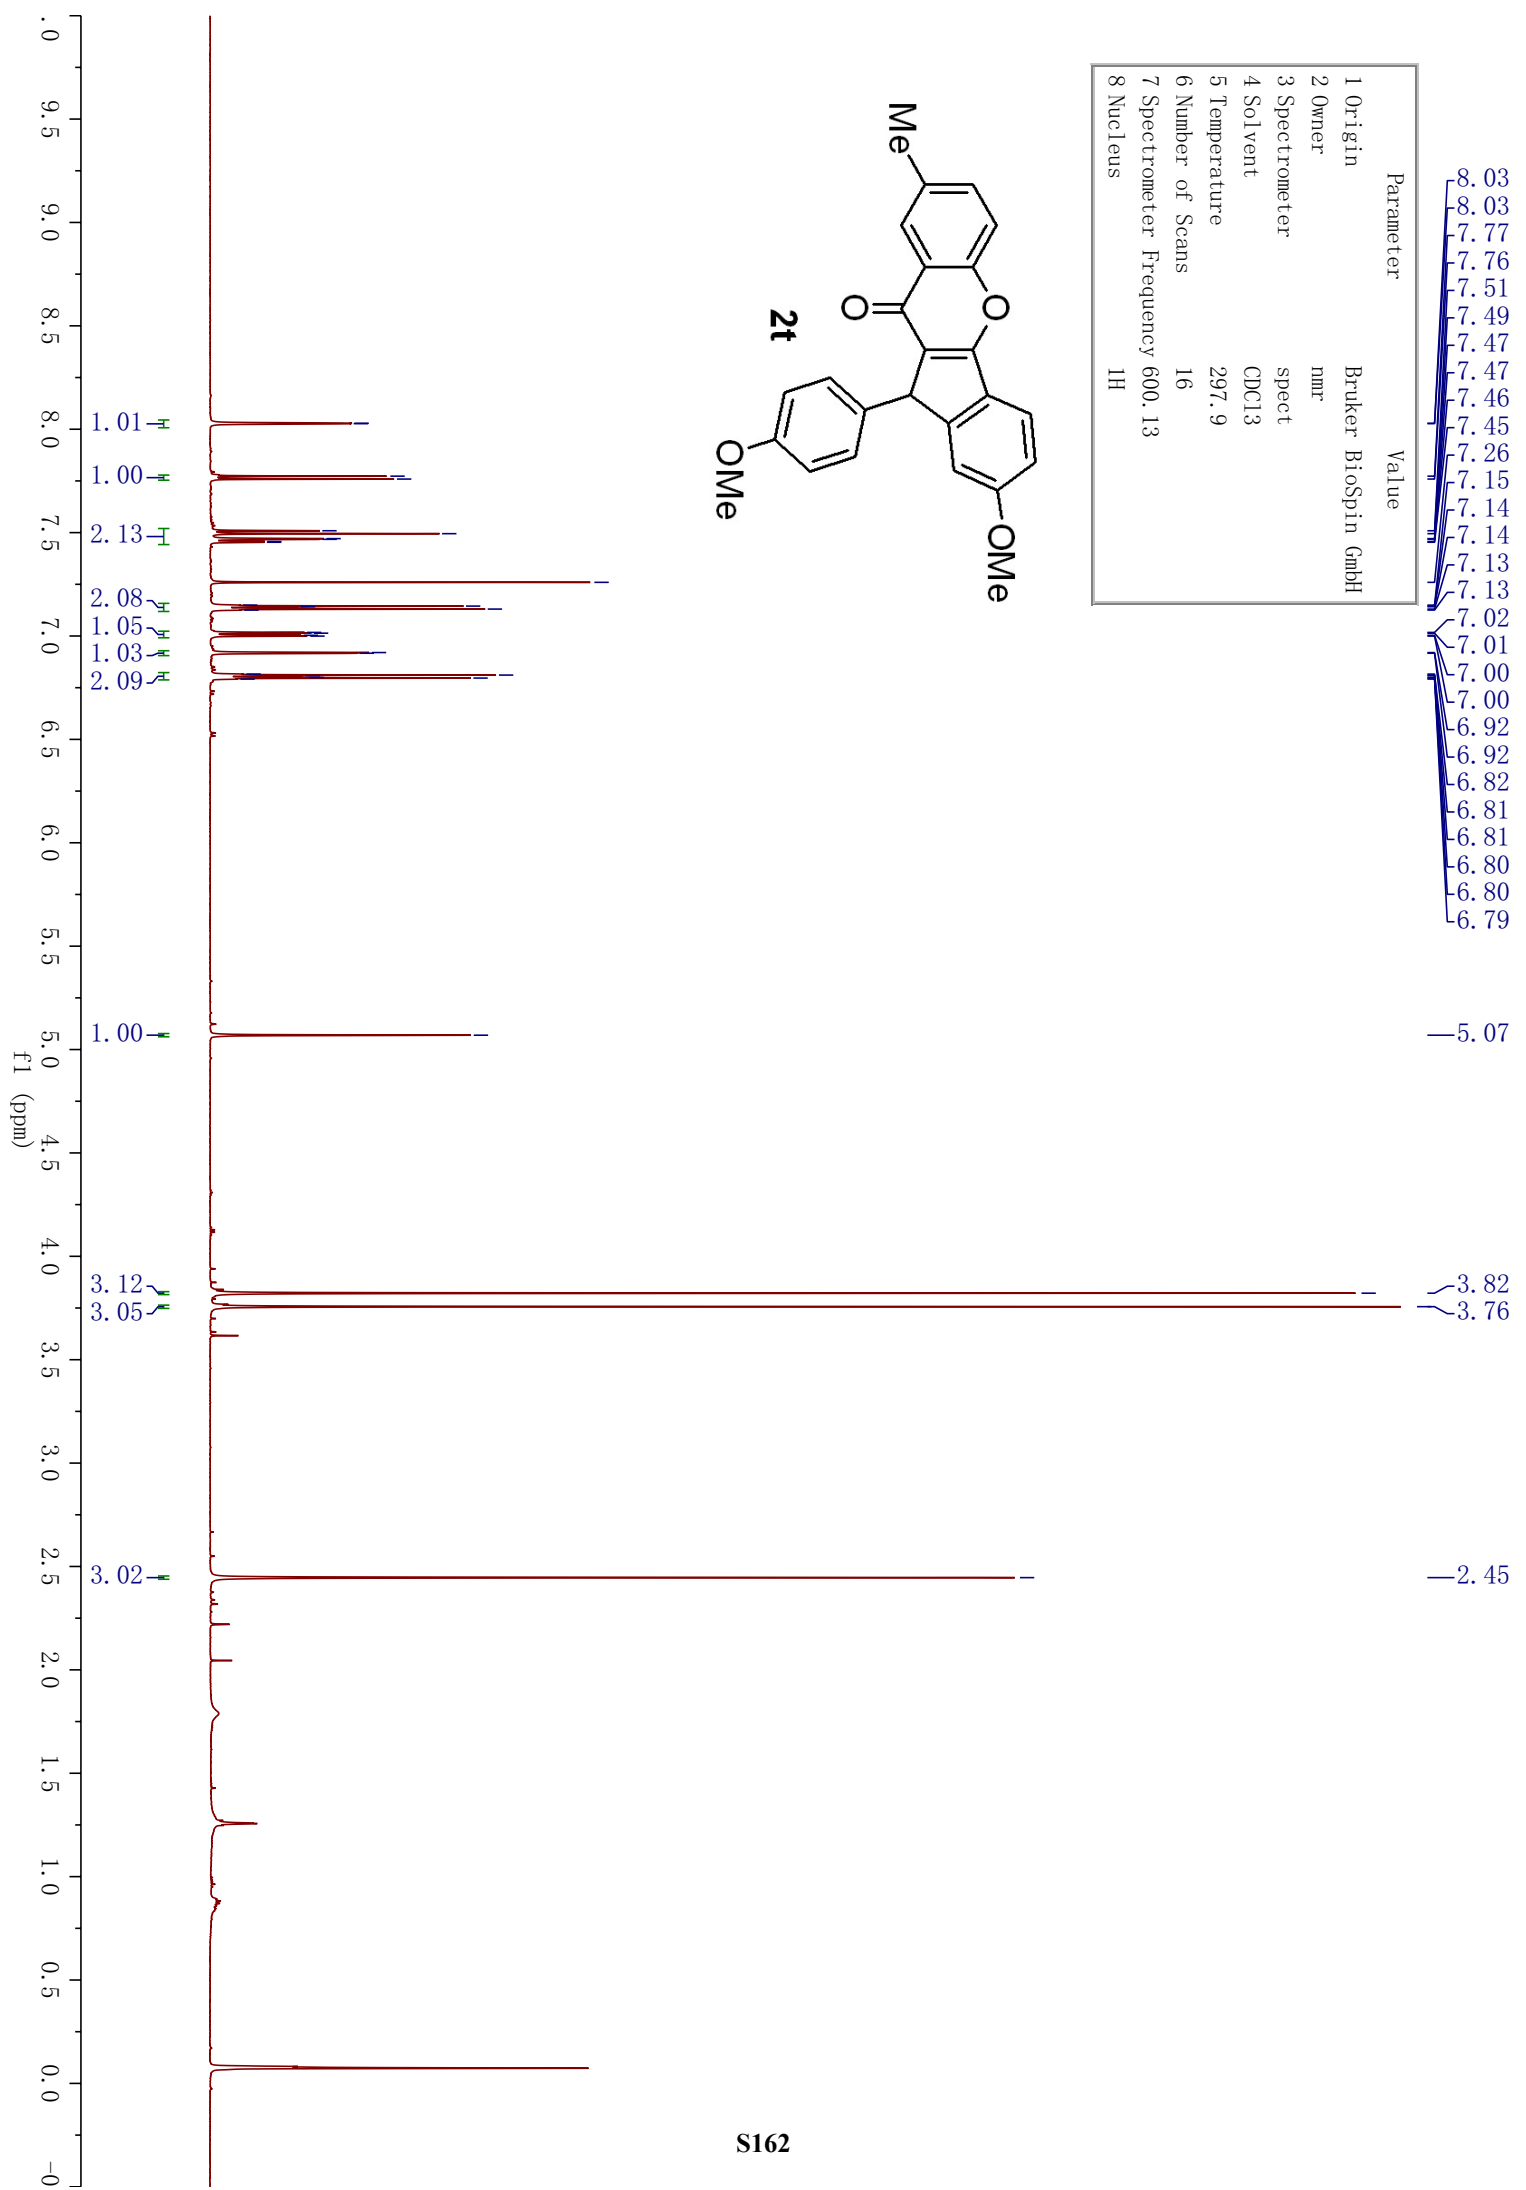

| Parameter                | Value               |
|--------------------------|---------------------|
| 1 Origin                 | Bruker Biospin GmbH |
| 2 Owner                  | nmr                 |
| 3 Spectrometer           | spect               |
| 4 Solvent                | CDCl3               |
| 5 Temperature            | 297.9               |
| 6 Number of Scans        | 500                 |
| 7 Spectrometer Frequency | 150.90              |
| 8 Nucleus                | <sup>13</sup> C     |

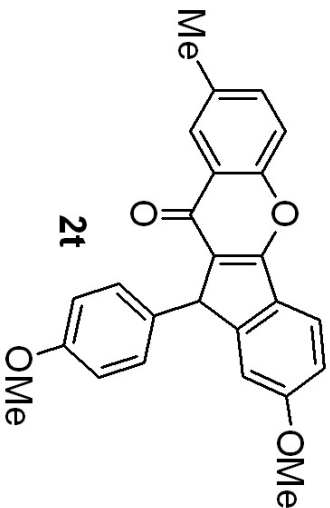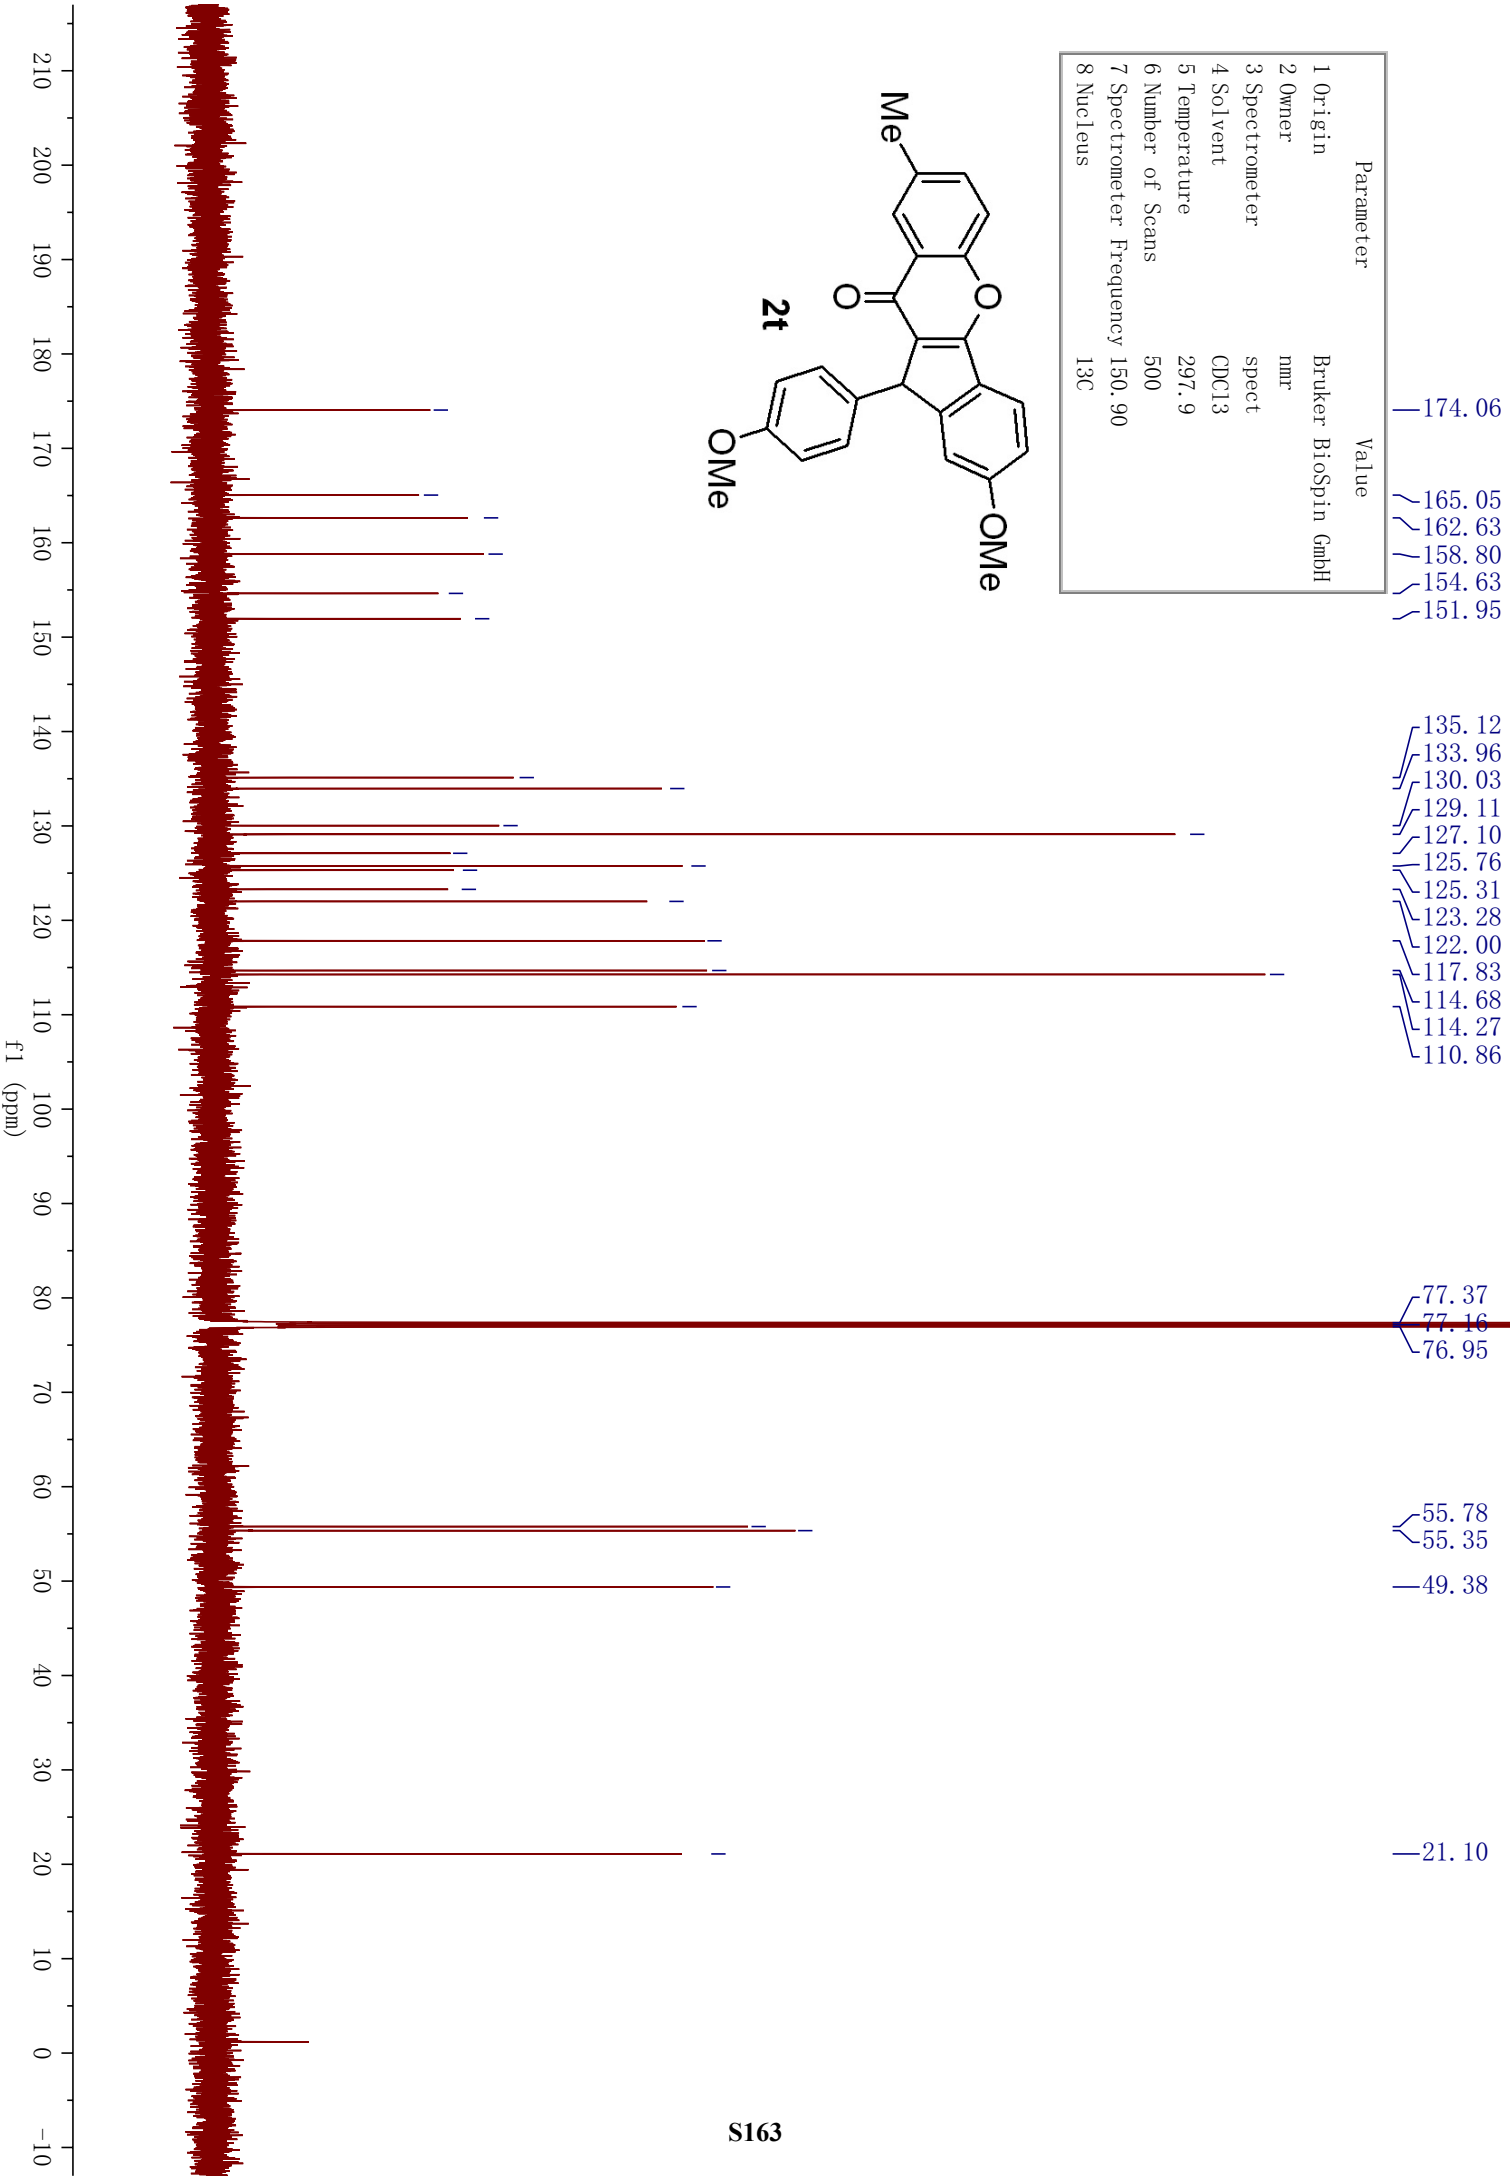



| Parameter                | Value                |
|--------------------------|----------------------|
| 1 Origin                 | Brucker BioSpin GmbH |
| 2 Owner                  | nmr                  |
| 3 Spectrometer           | spect                |
| 4 Solvent                | CDCl3                |
| 5 Temperature            | 297.9                |
| 6 Number of Scans        | 16                   |
| 7 Spectrometer Frequency | 600.13               |
| 8 Nucleus                | 1H                   |

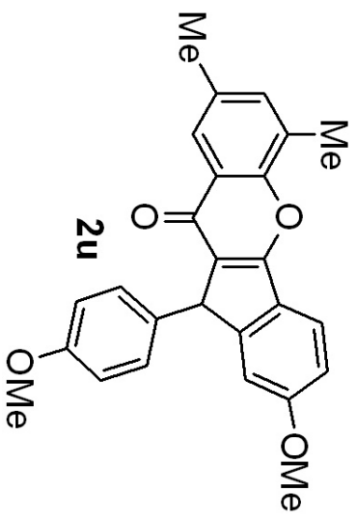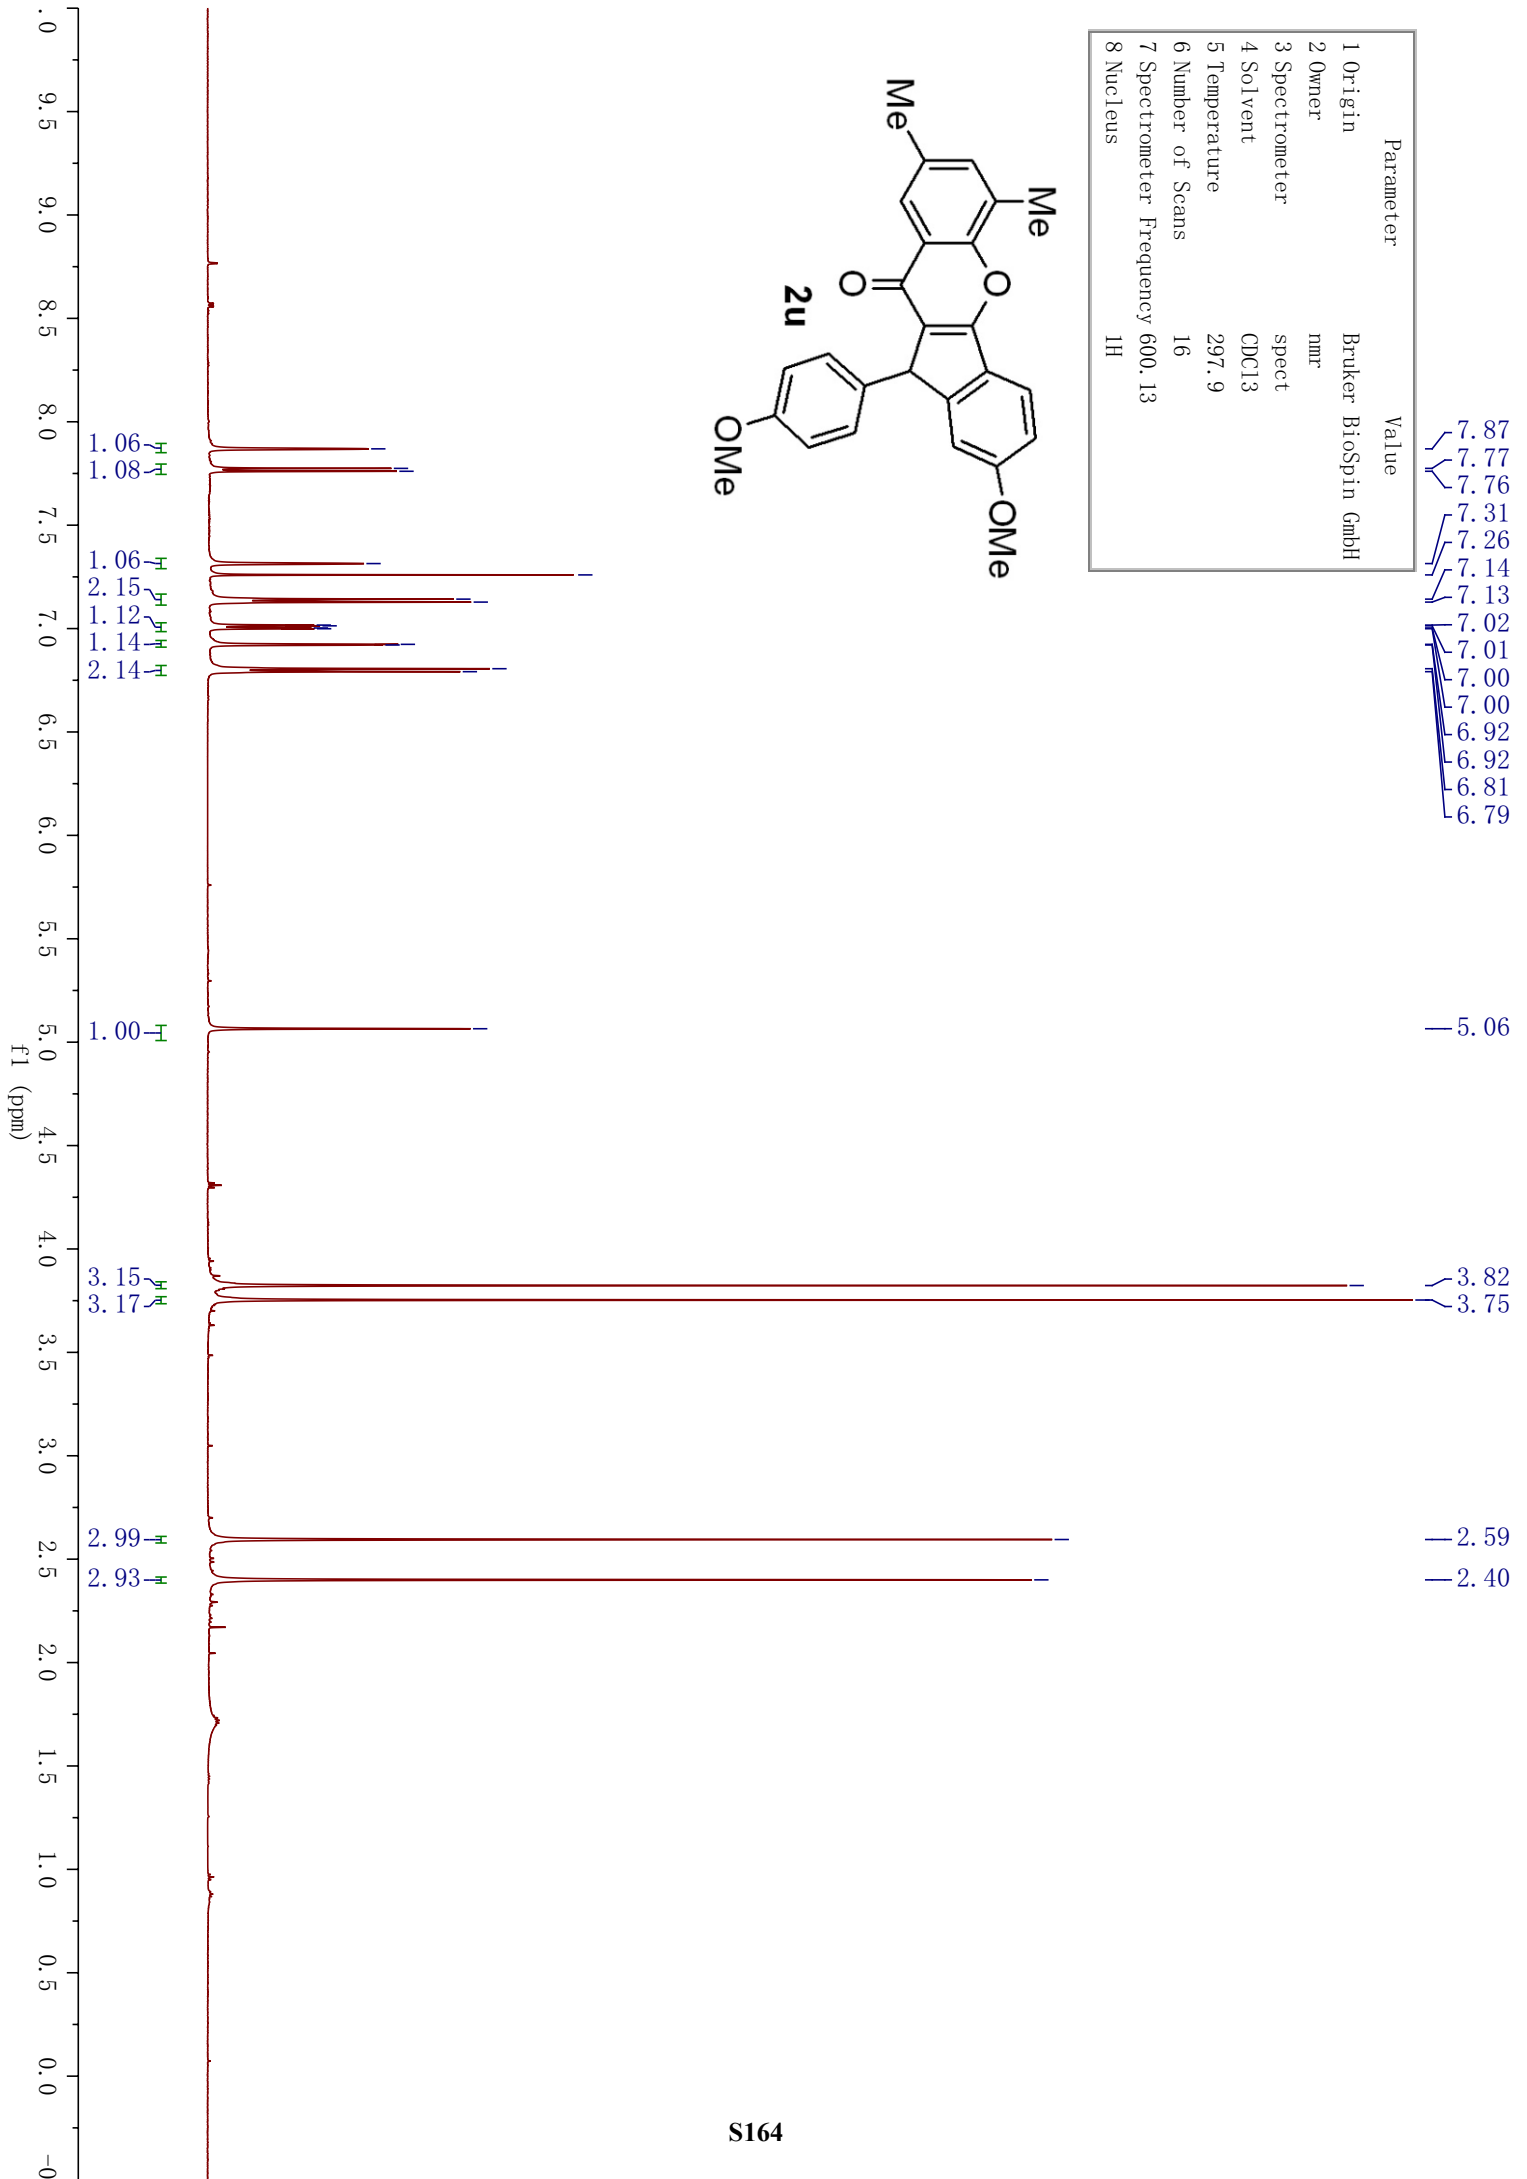

| Parameter                | Value                |
|--------------------------|----------------------|
| 1 Origin                 | Brucker BioSpin GmbH |
| 2 Owner                  | nmr                  |
| 3 Spectrometer           | spect                |
| 4 Solvent                | CDCl3                |
| 5 Temperature            | 297.9                |
| 6 Number of Scans        | 2244                 |
| 7 Spectrometer Frequency | 150.90               |
| 8 Nucleus                | <sup>13</sup> C      |

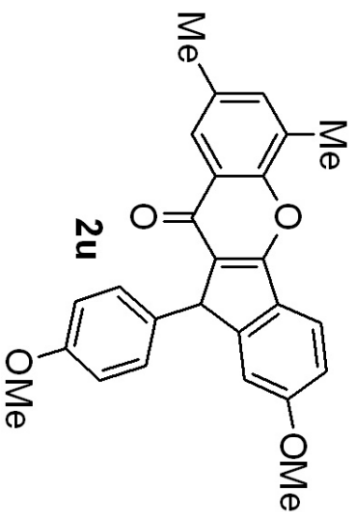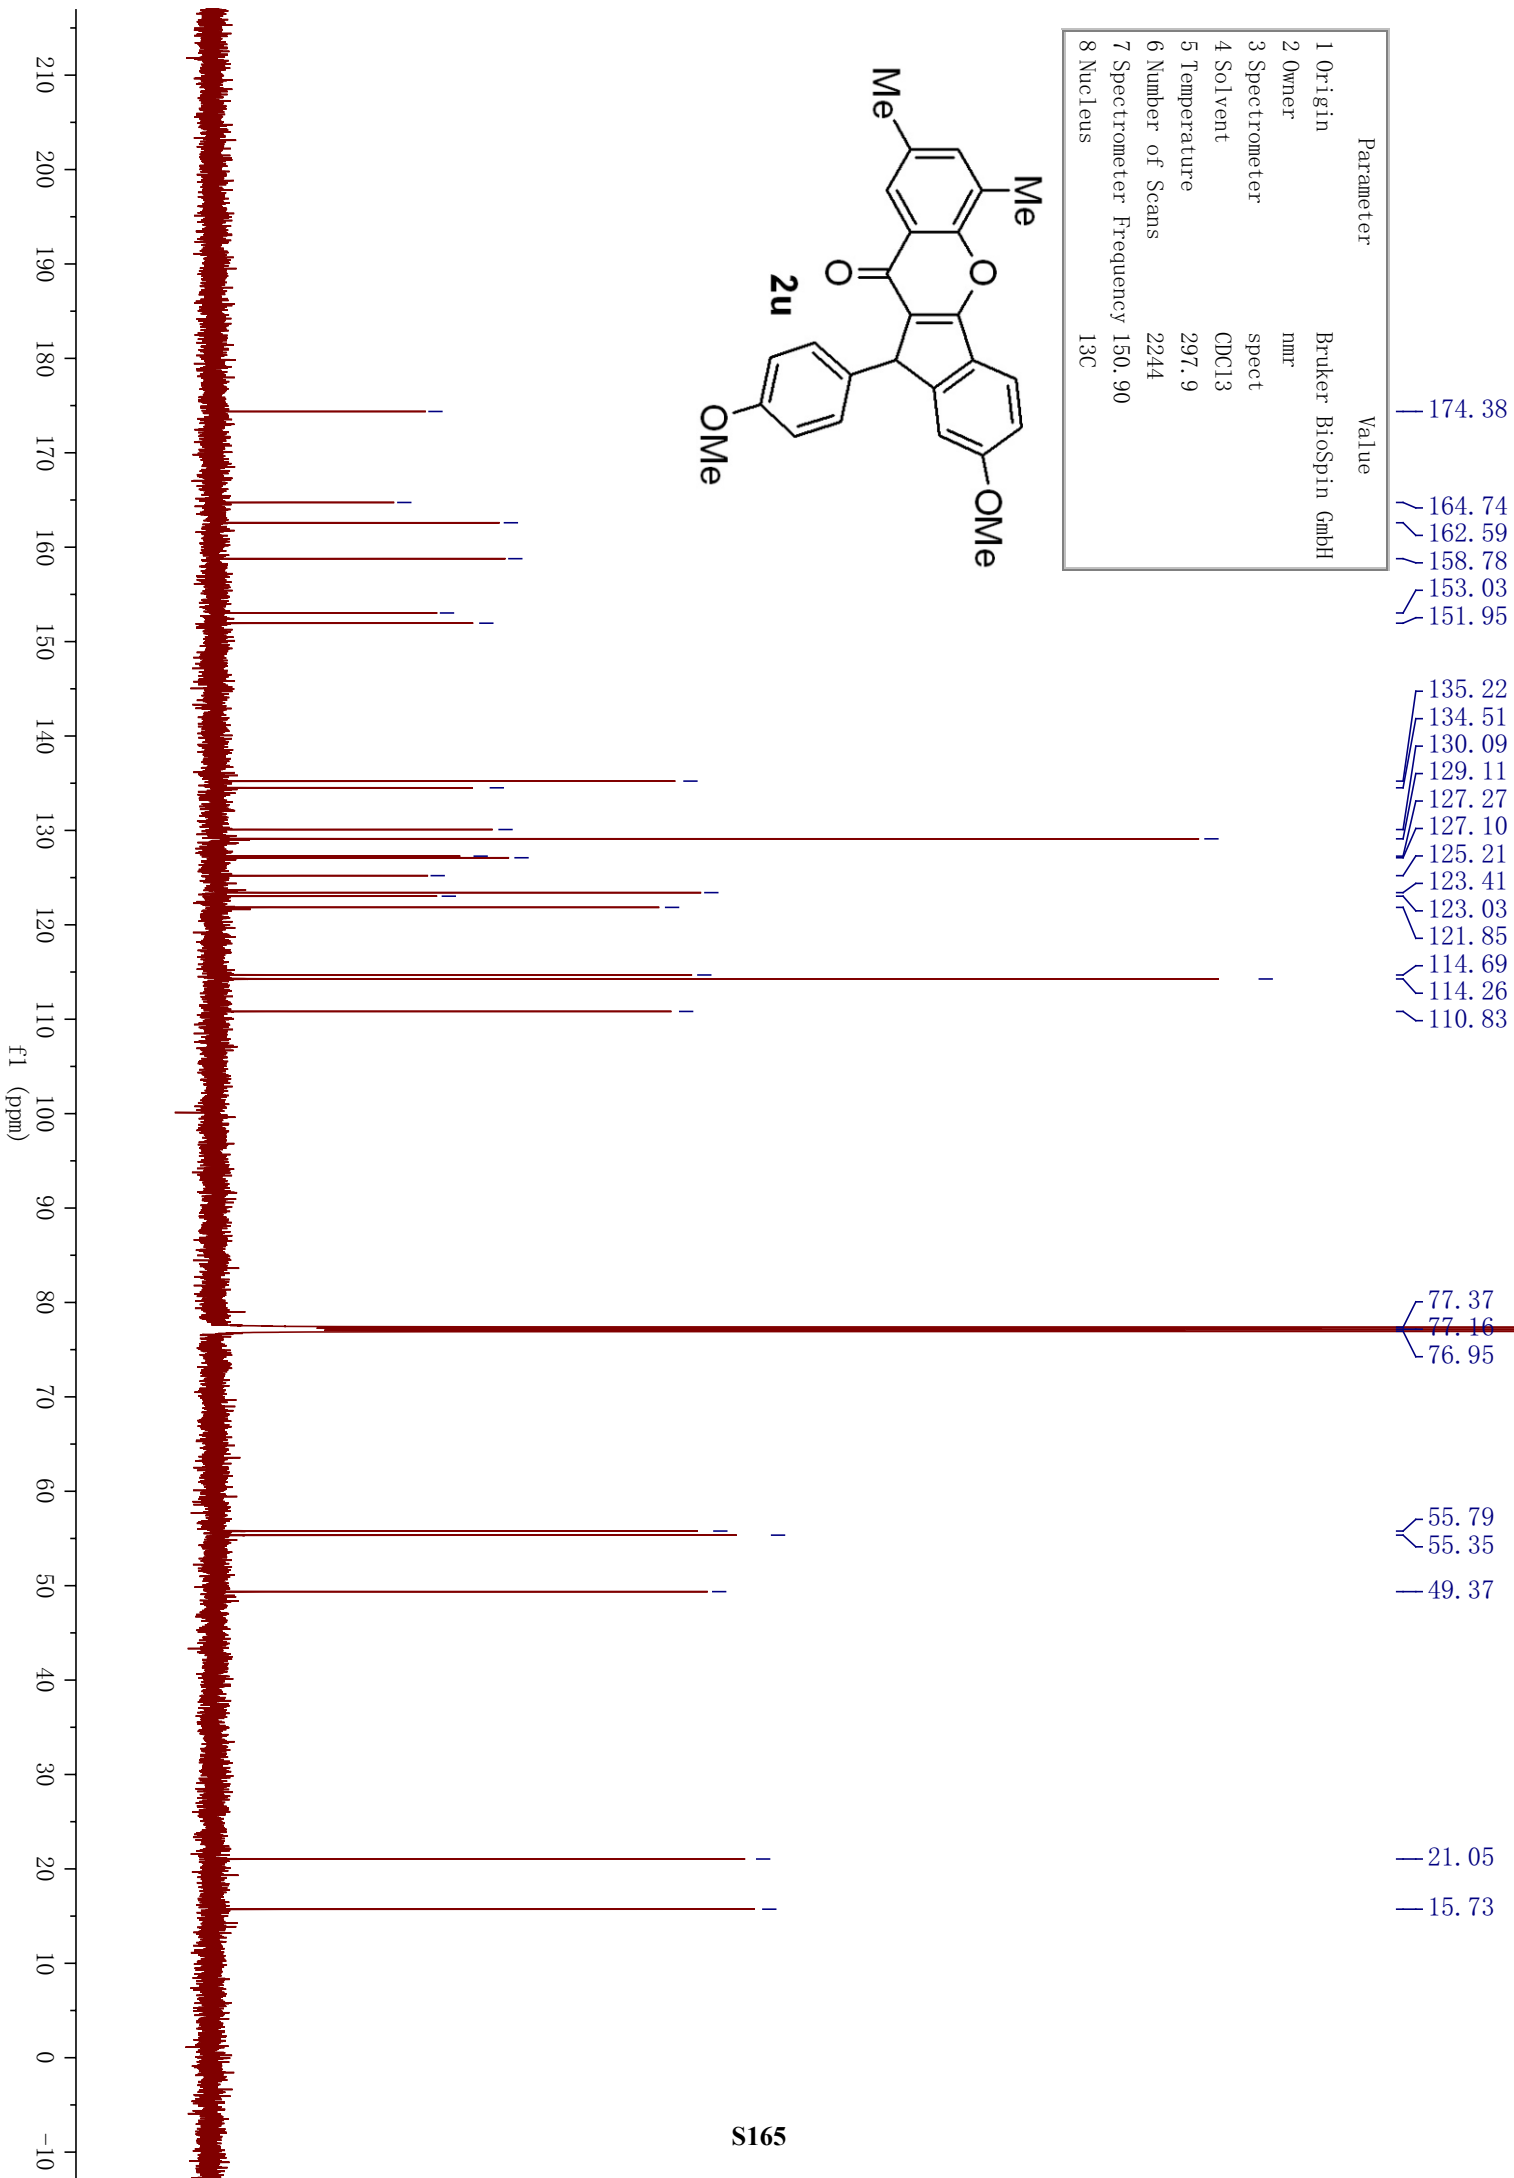

| Parameter                | Value |
|--------------------------|-------|
| 1 Origin                 | 8.16  |
| 2 Owner                  | 8.14  |
| 3 Spectrometer           | 7.75  |
| 4 Solvent                | 7.74  |
| 5 Temperature            | 7.26  |
| 6 Number of Scans        | 7.14  |
| 7 Spectrometer Frequency | 7.13  |
| 8 Nucleus                | 7.04  |

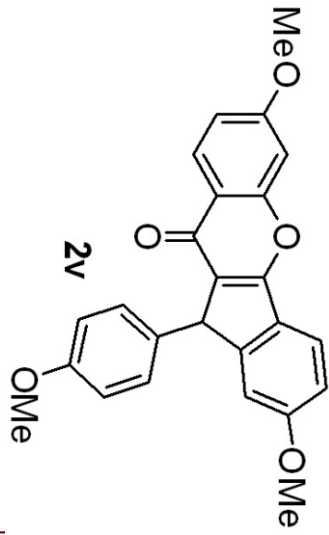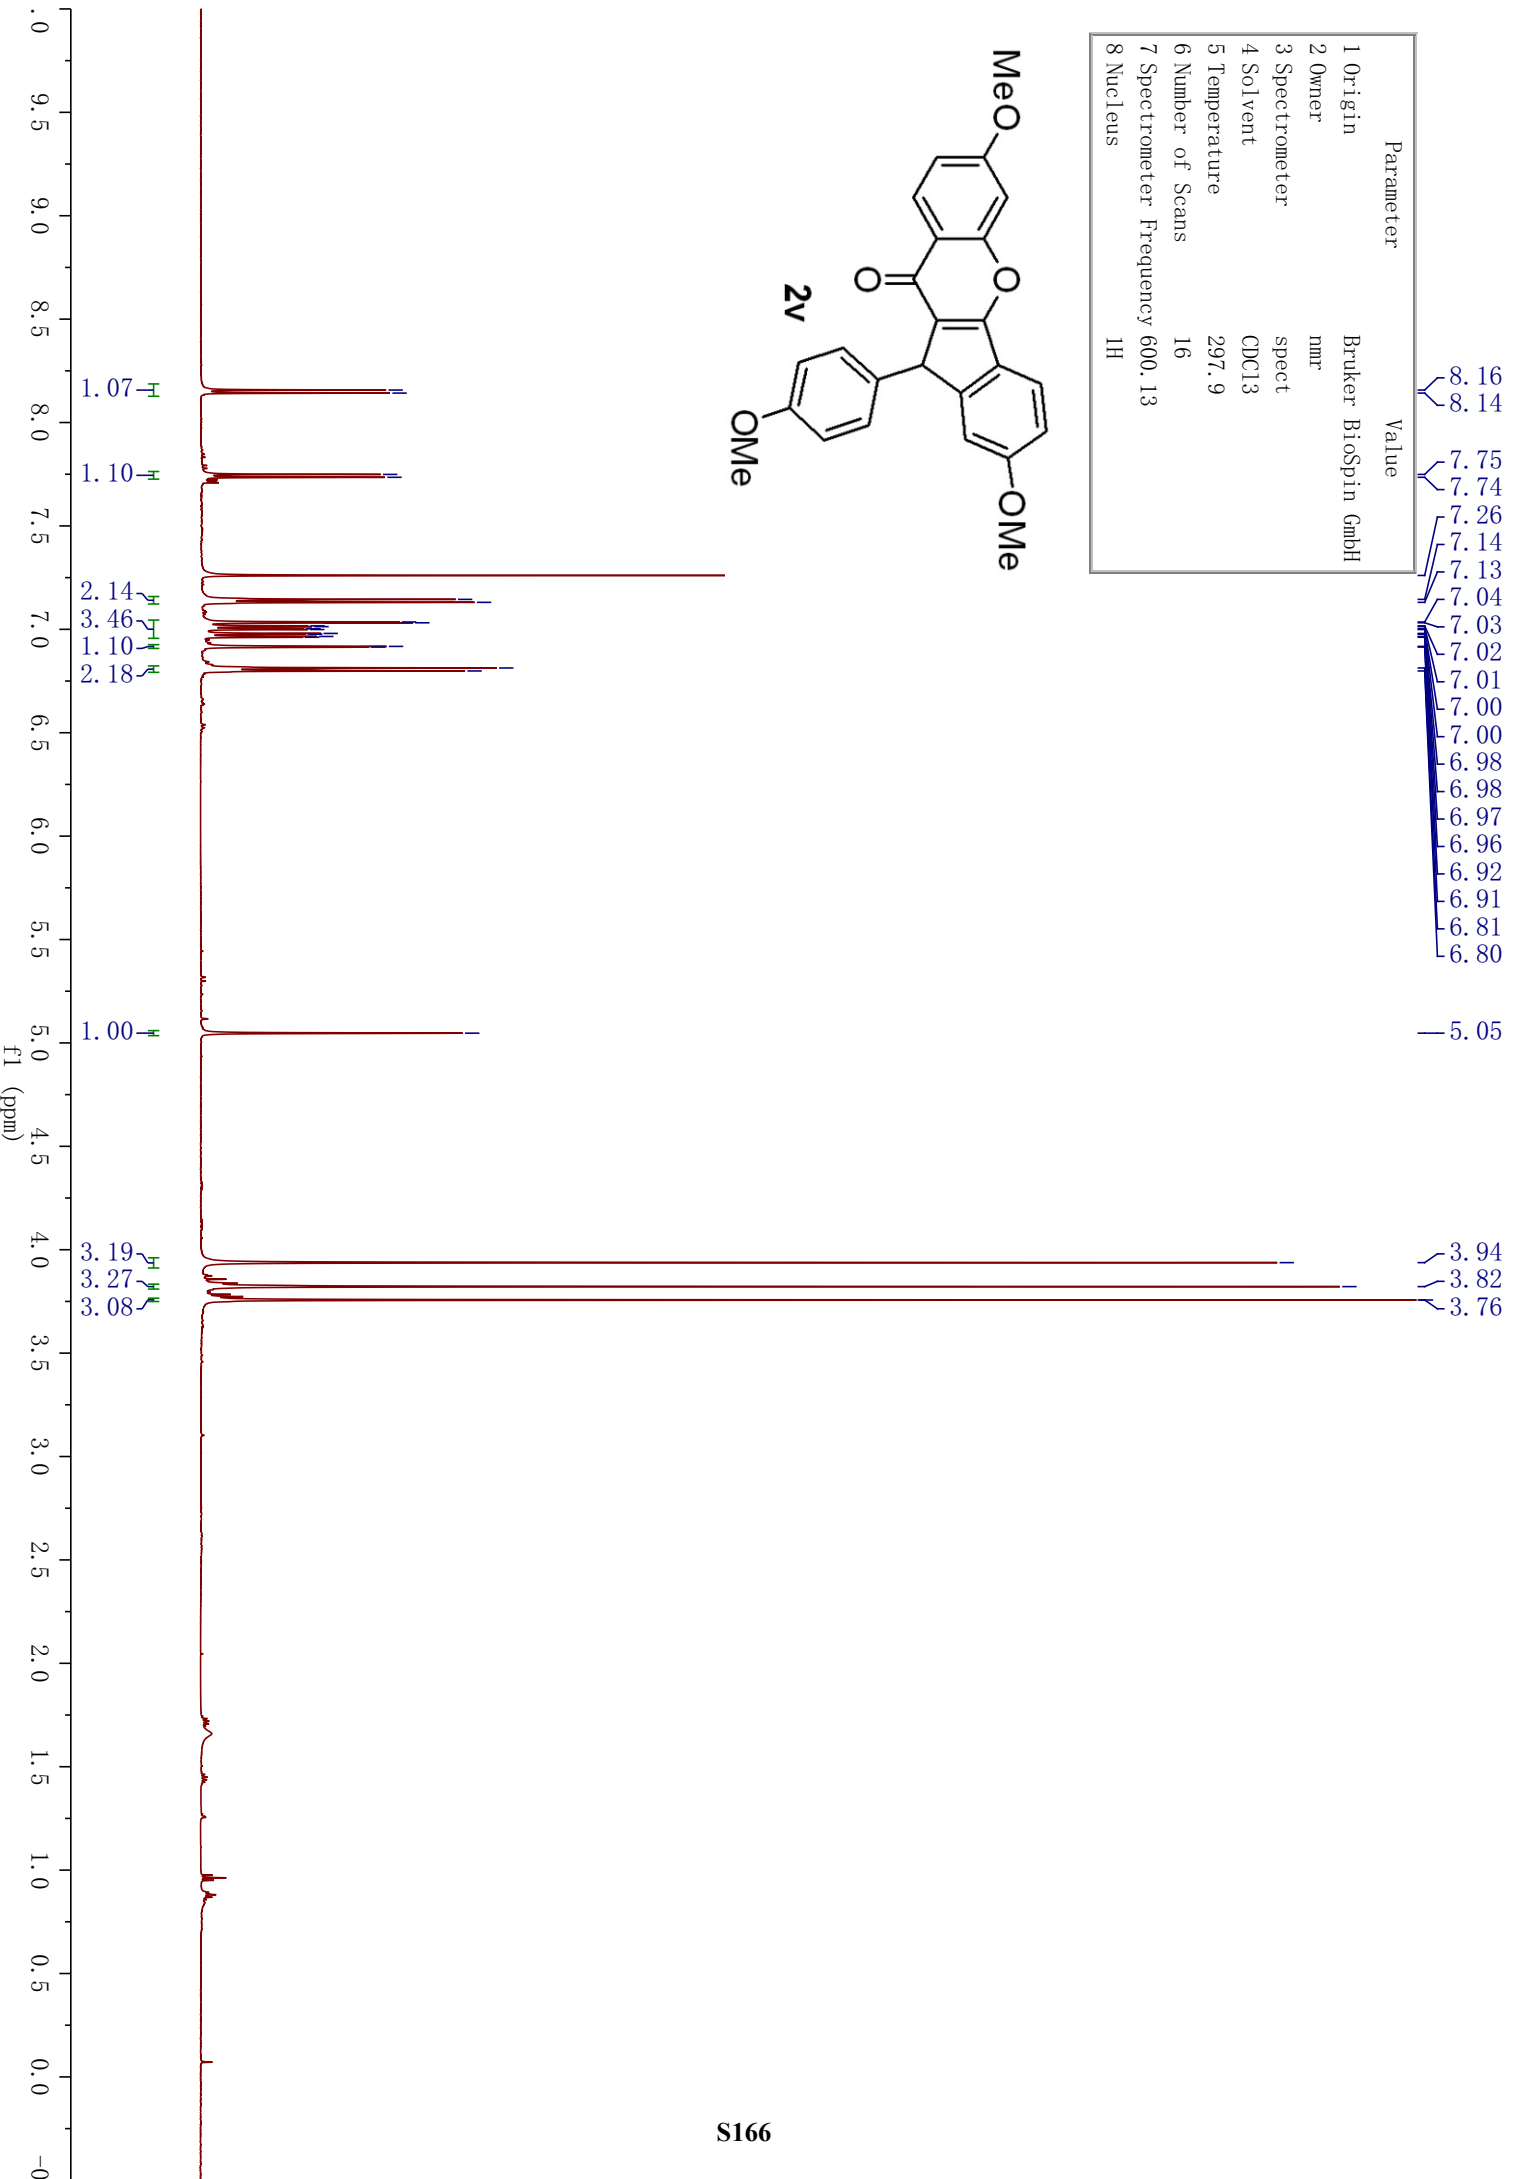

| Parameter                | Value               |
|--------------------------|---------------------|
| 1 Origin                 | Brüker Biospin GmbH |
| 2 Owner                  | nmr                 |
| 3 Spectrometer           | spect               |
| 4 Solvent                | CDCl <sub>3</sub>   |
| 5 Temperature            | 298.1               |
| 6 Number of Scans        | 353                 |
| 7 Spectrometer Frequency | 150.90              |
| 8 Nucleus                | <sup>13</sup> C     |

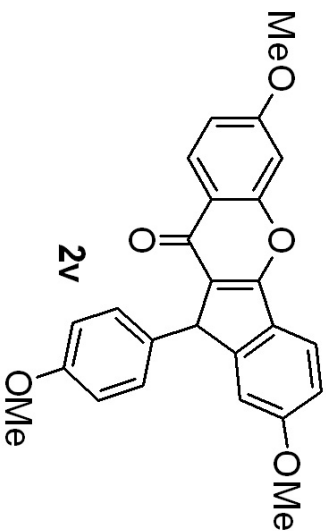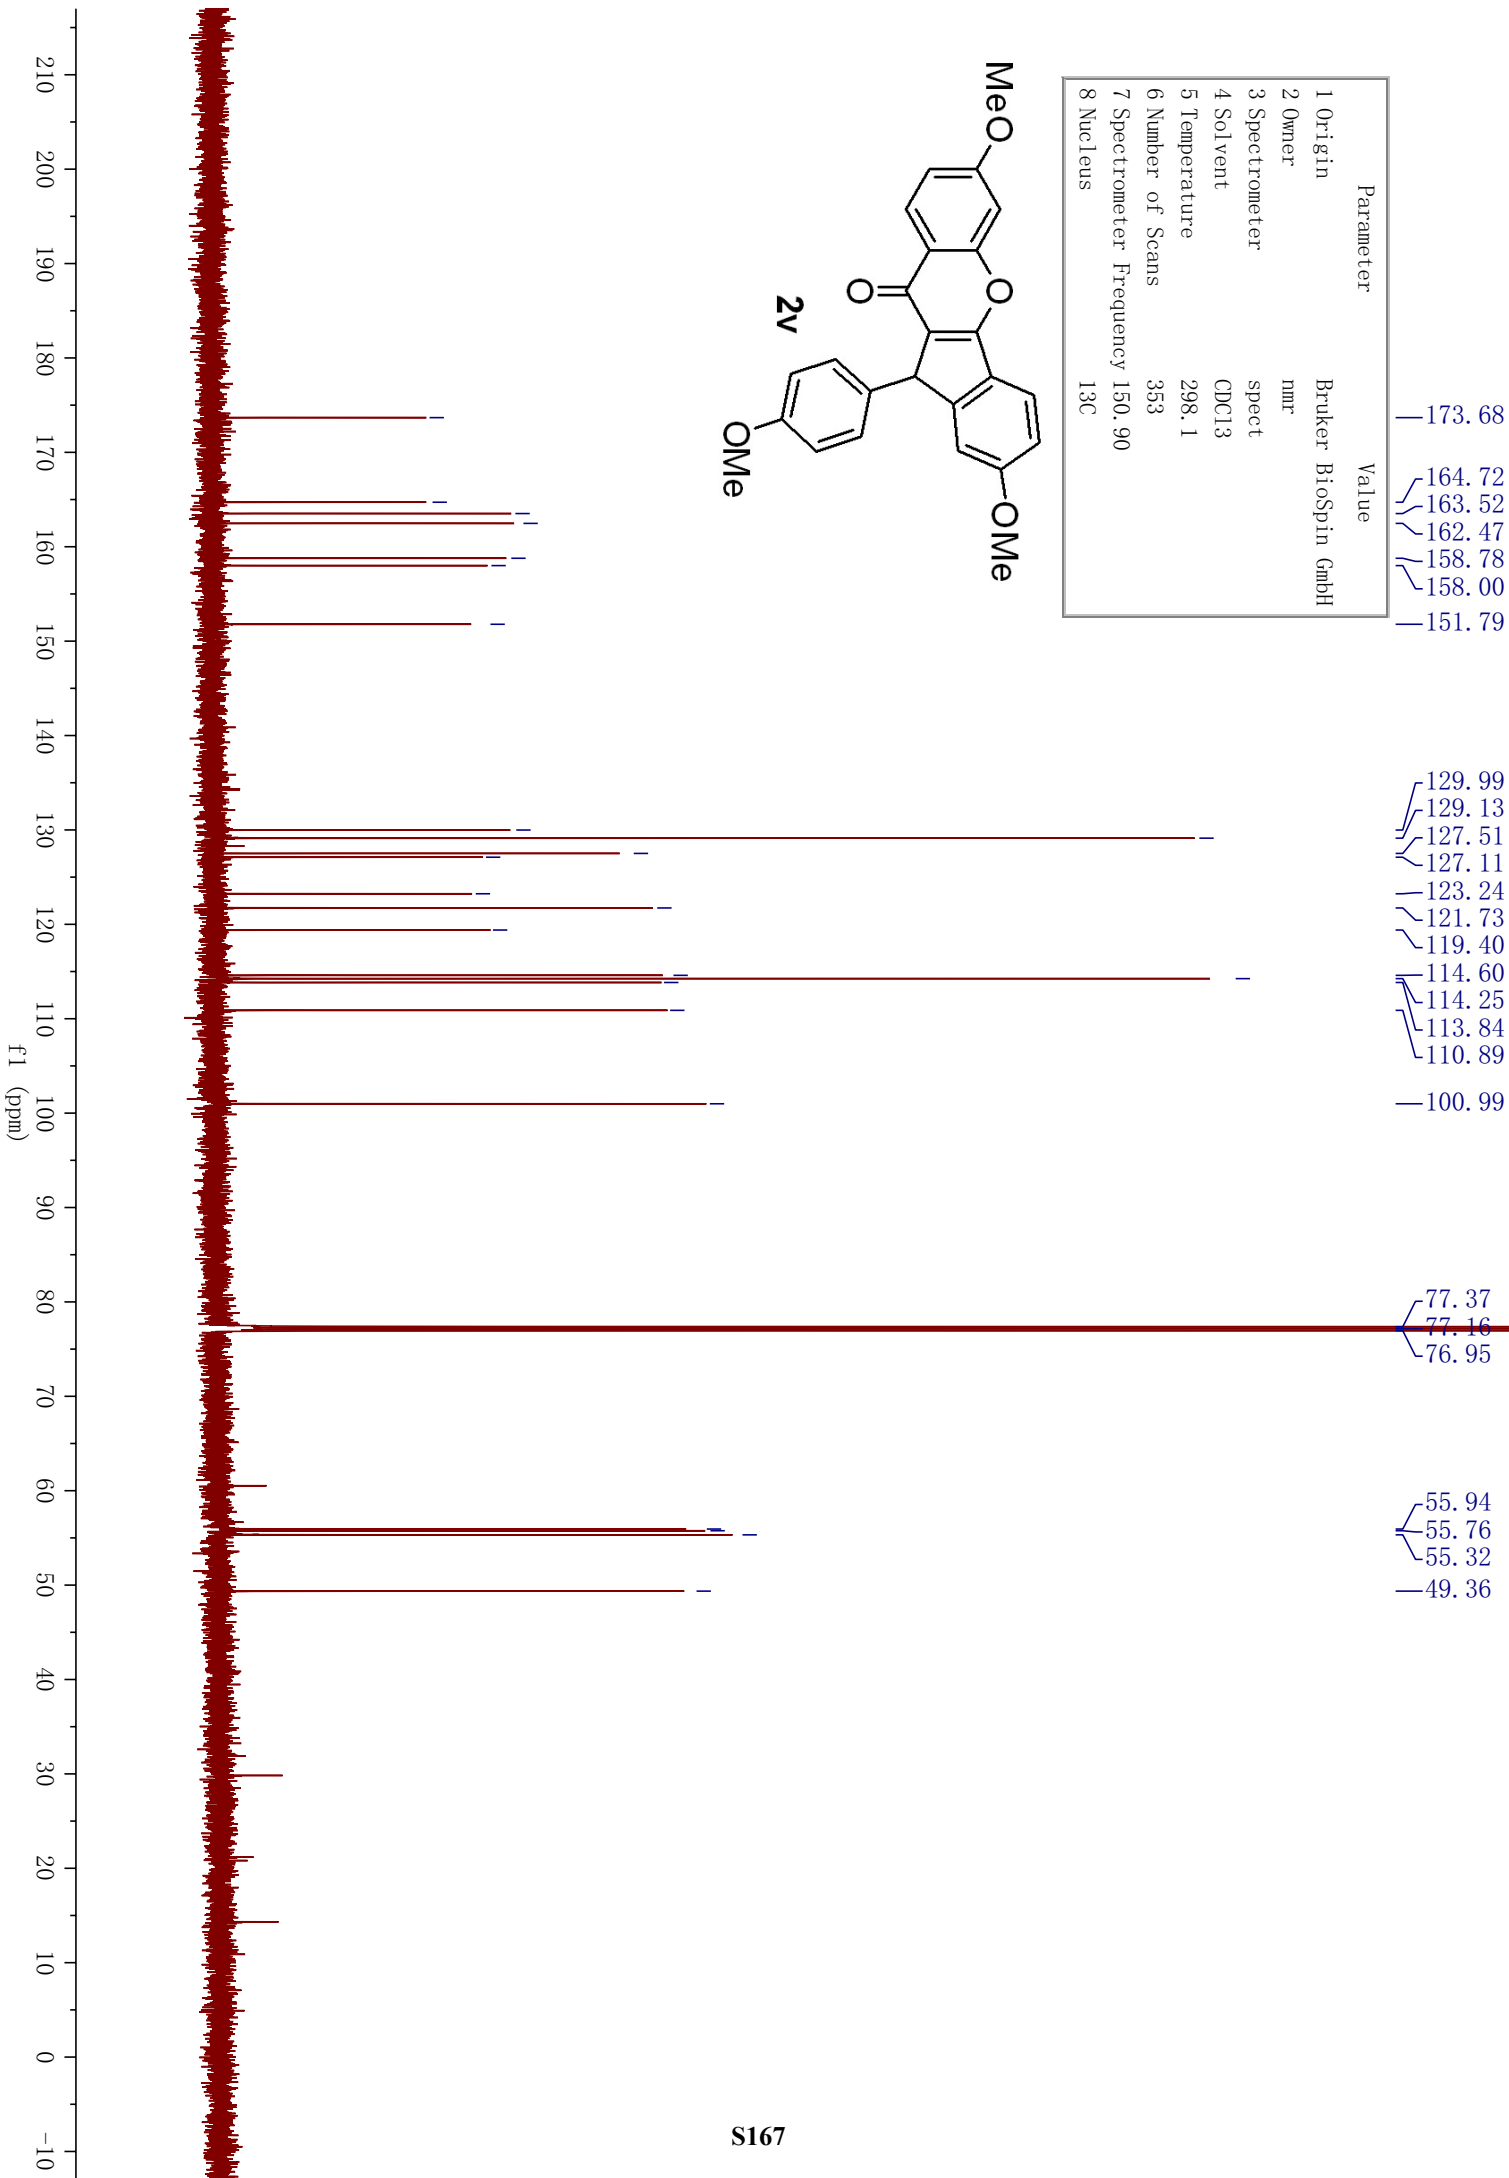

| Parameter                | Value               |
|--------------------------|---------------------|
| 1 Origin                 | Brüker Biospin GmbH |
| 2 Owner                  | nmr                 |
| 3 Spectrometer           | spect               |
| 4 Solvent                | CDCl3               |
| 5 Temperature            | 297.9               |
| 6 Number of Scans        | 16                  |
| 7 Spectrometer Frequency | 600.13              |
| 8 Nucleus                | <sup>1</sup> H      |

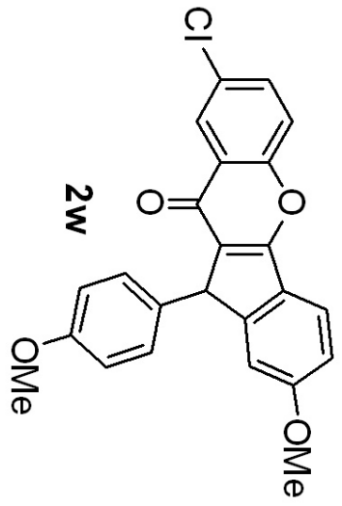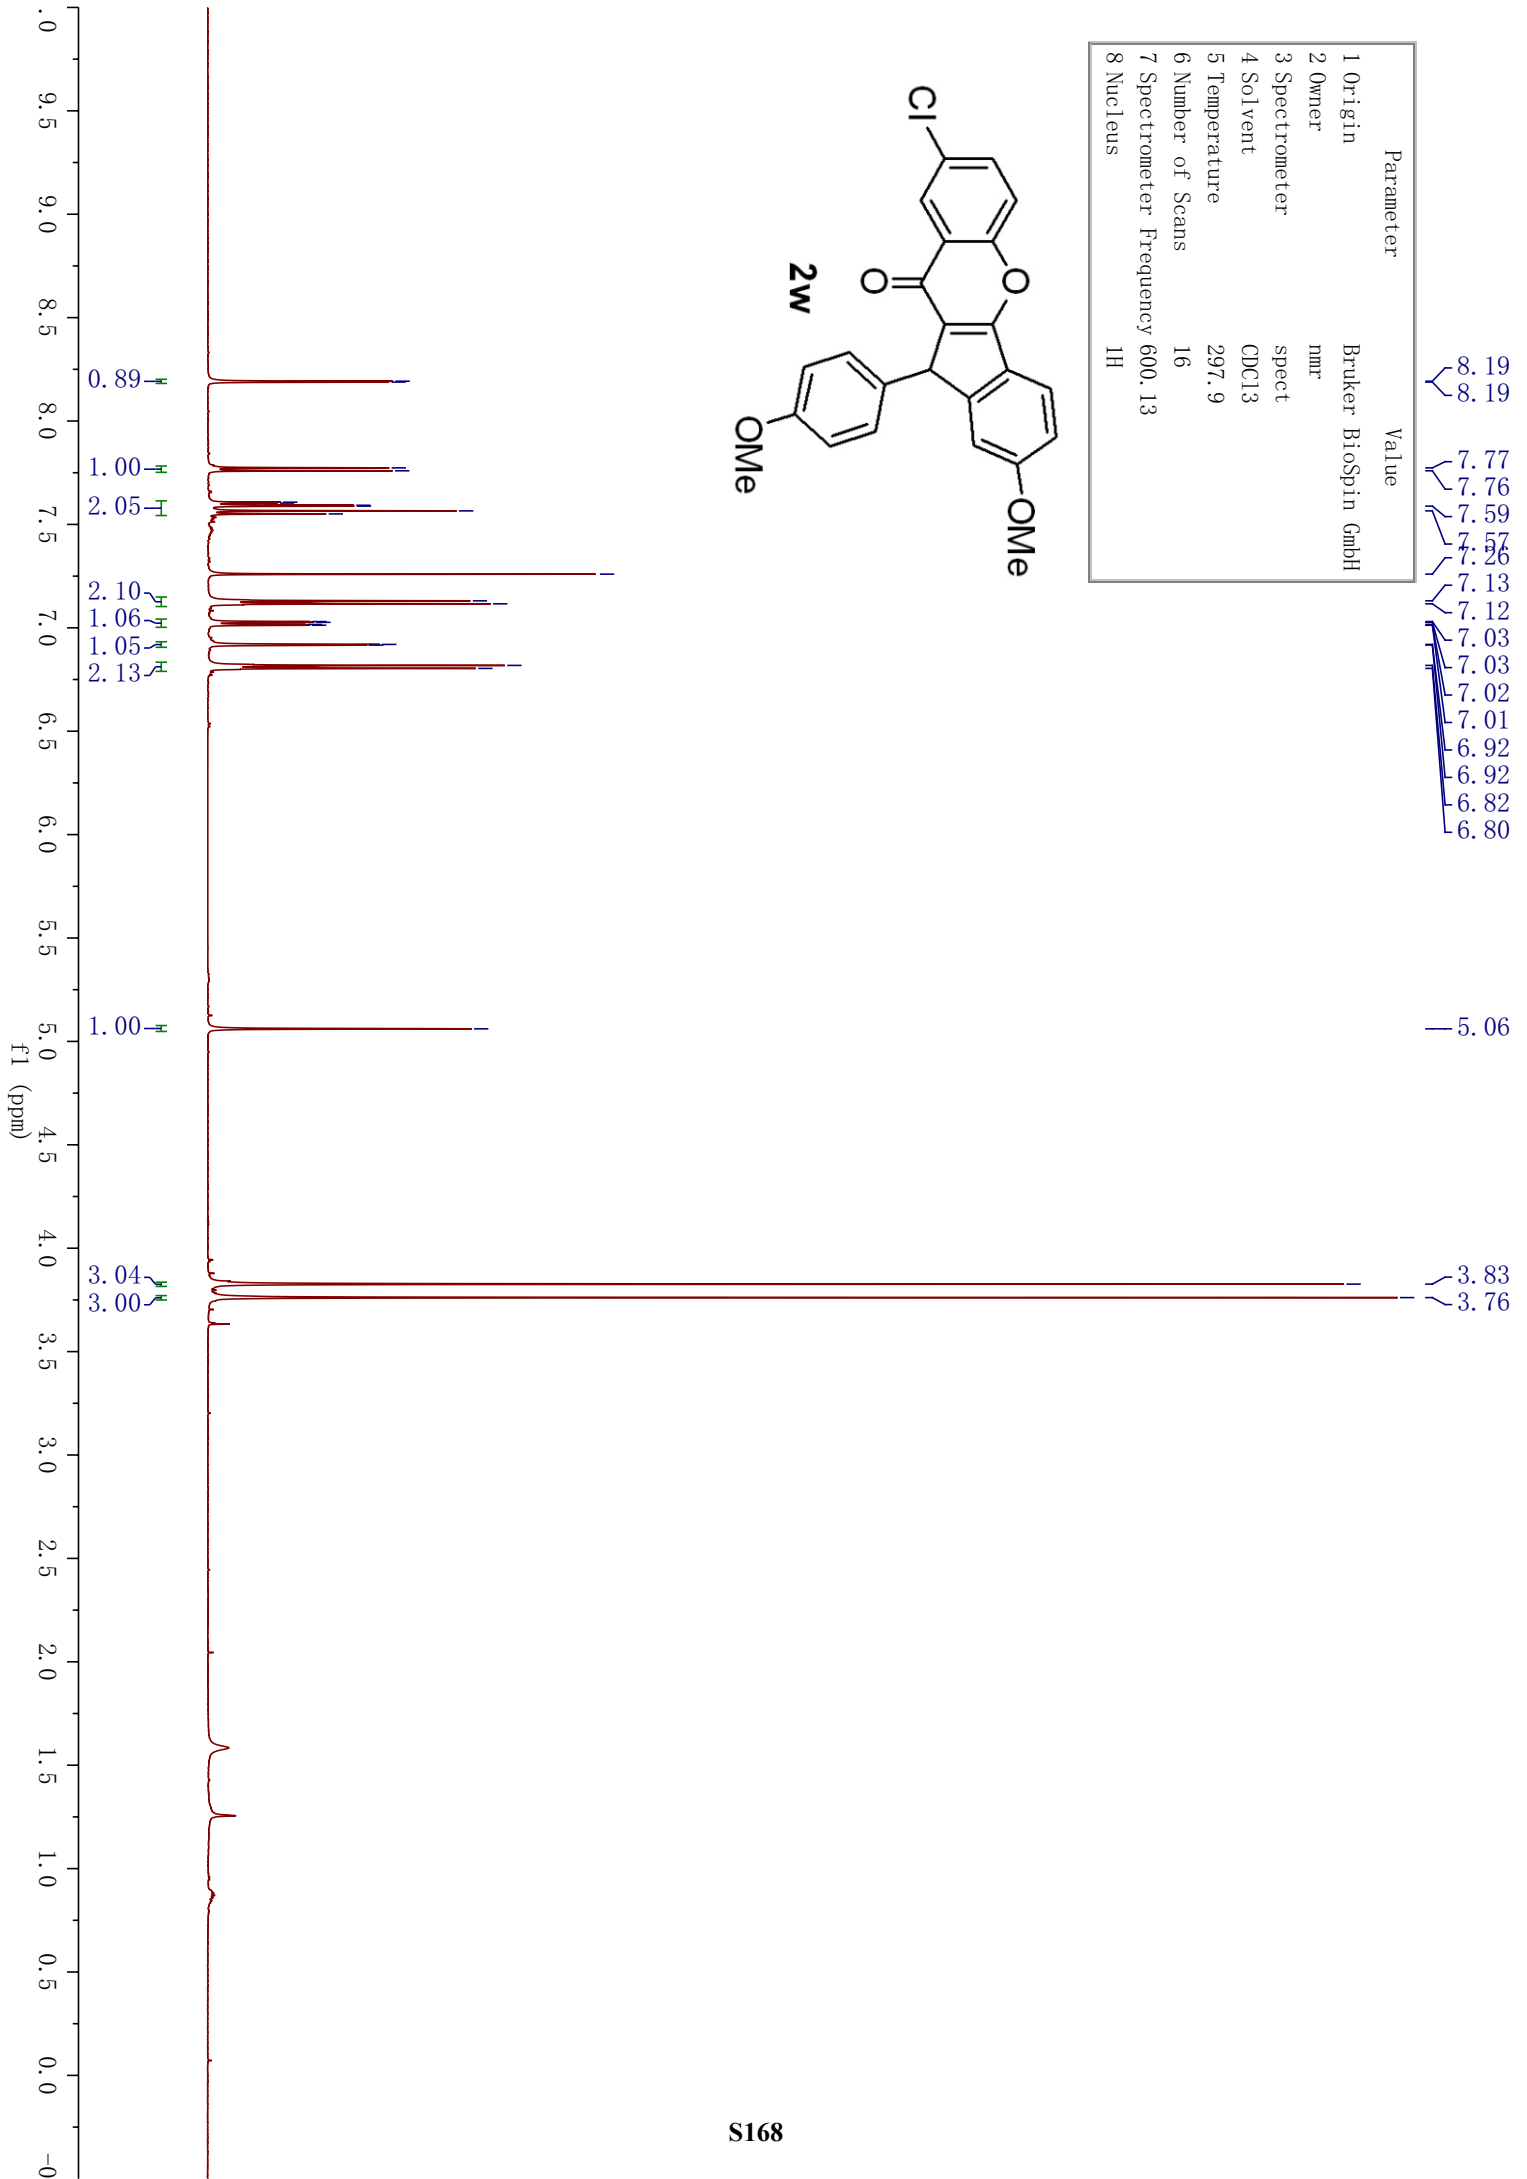

| Parameter                | Value               |
|--------------------------|---------------------|
| 1 Origin                 | Bruker Biospin GmbH |
| 2 Owner                  | nmr                 |
| 3 Spectrometer           | spect               |
| 4 Solvent                | CDCl3               |
| 5 Temperature            | 297.9               |
| 6 Number of Scans        | 816                 |
| 7 Spectrometer Frequency | 150.90              |
| 8 Nucleus                | <sup>13</sup> C     |

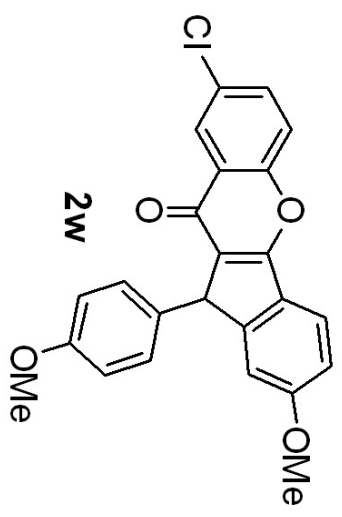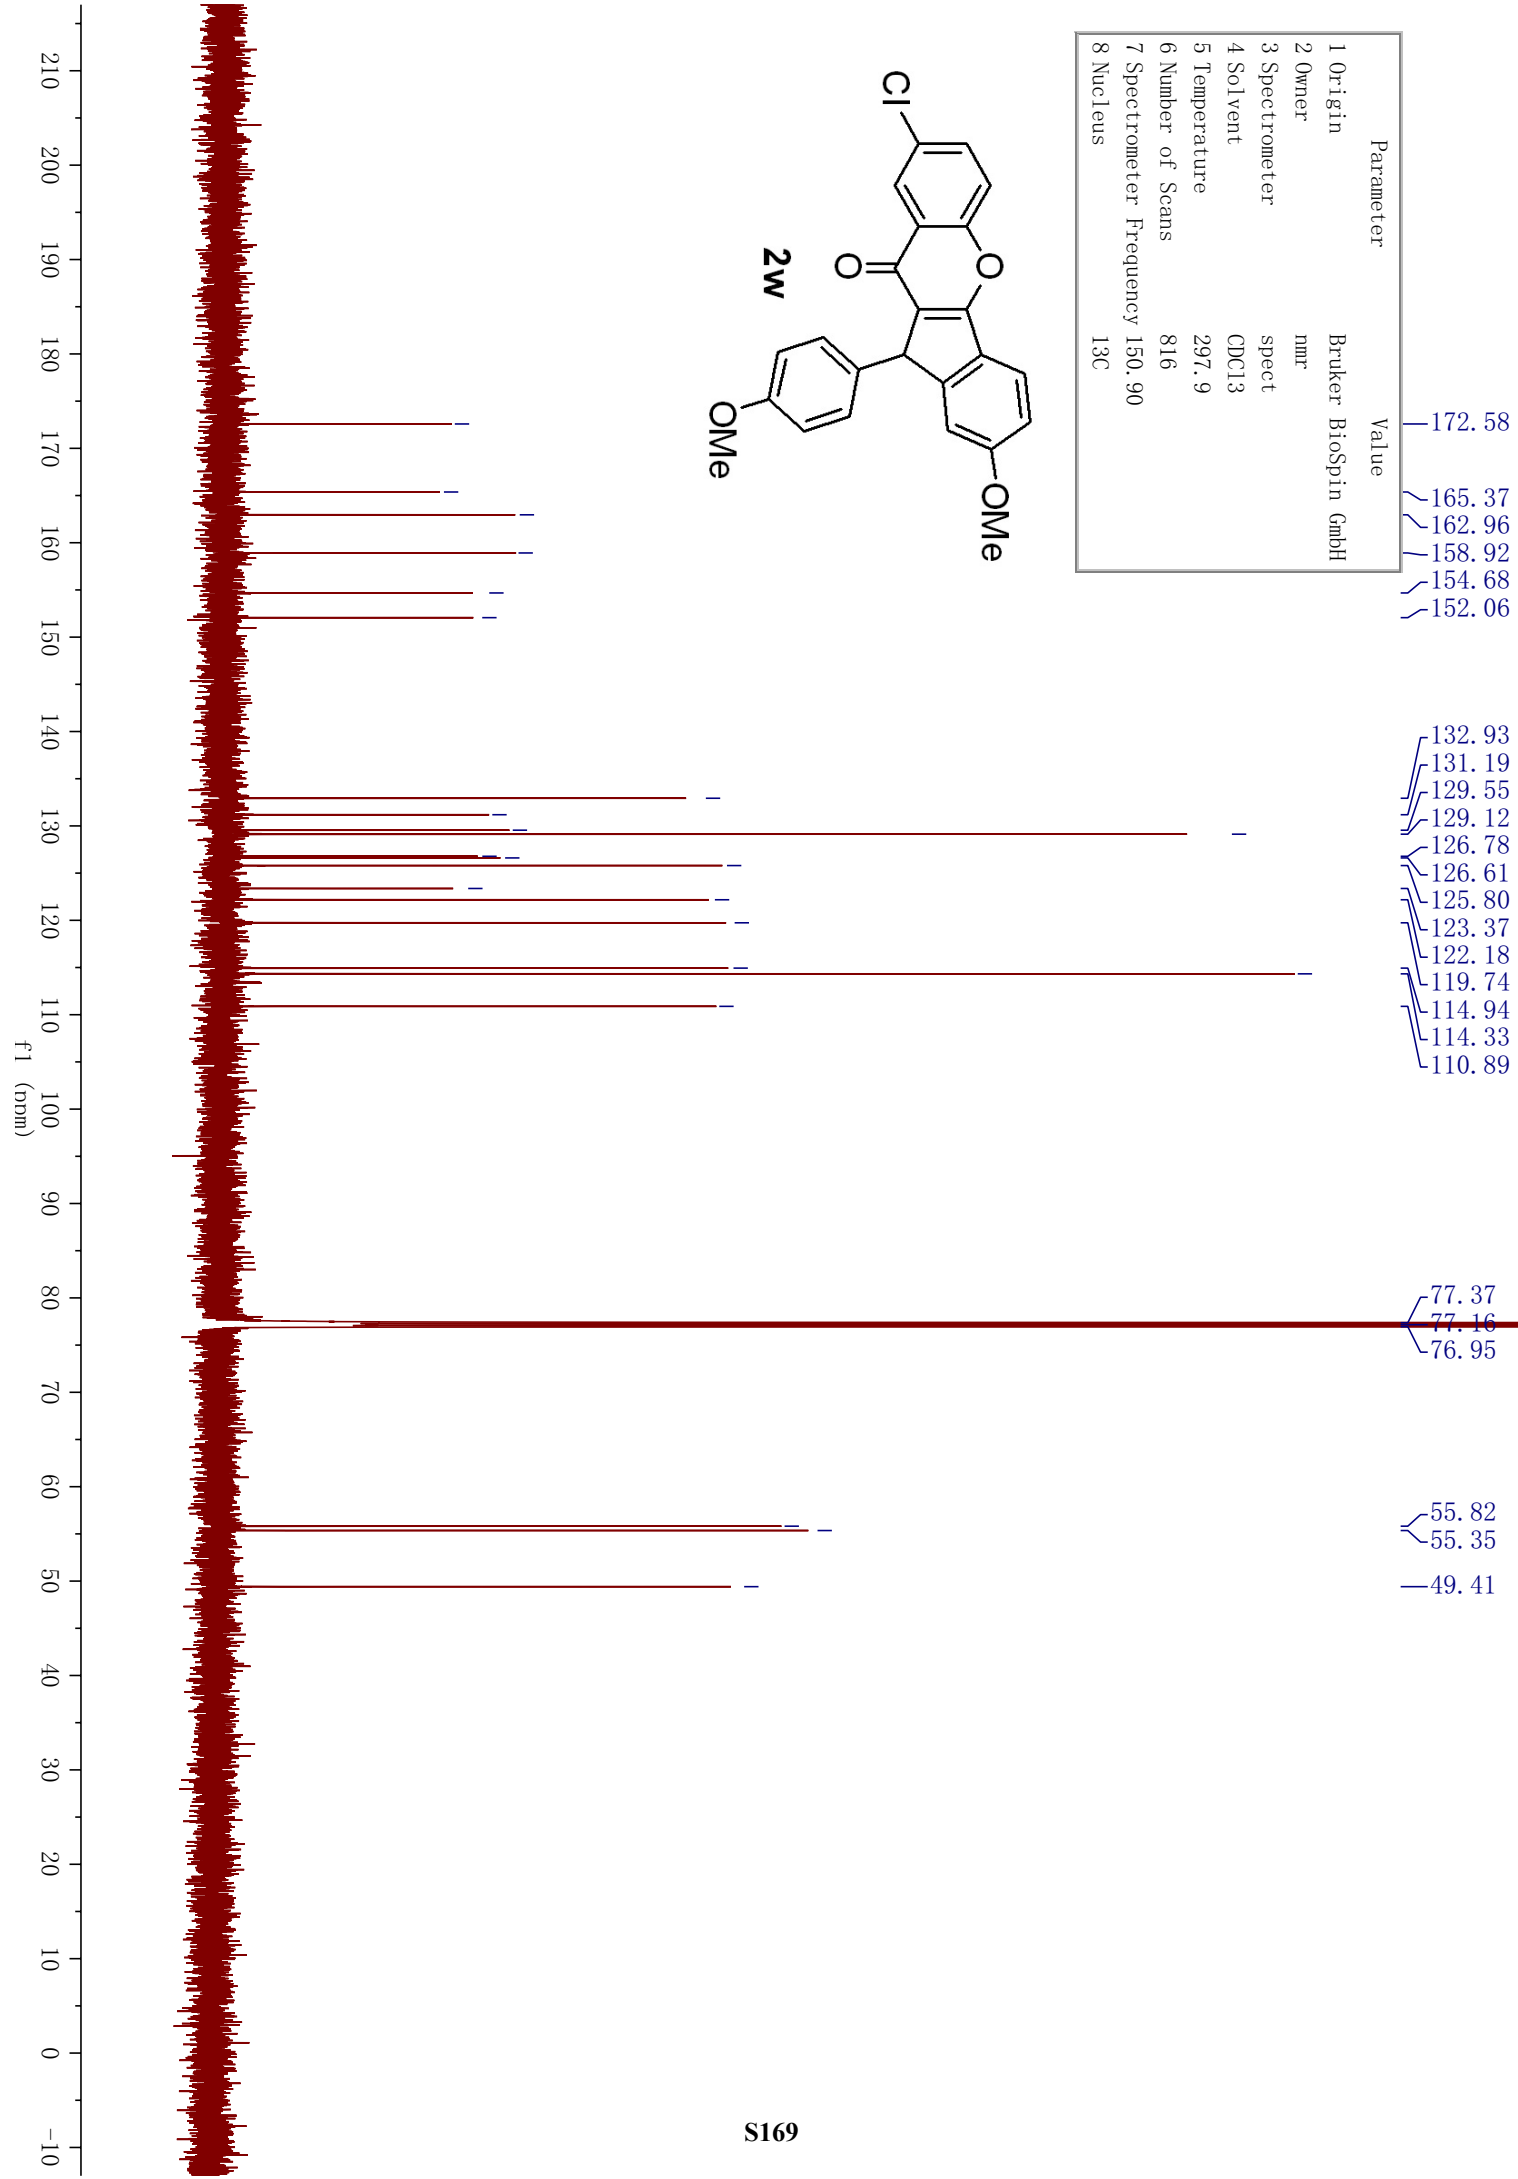

| Parameter                | Value                |
|--------------------------|----------------------|
| 1 Origin                 | Brucker Biospin GmbH |
| 2 Owner                  | nmr                  |
| 3 Spectrometer           | spect                |
| 4 Solvent                | CDCl3                |
| 5 Temperature            | 297.9                |
| 6 Number of Scans        | 16                   |
| 7 Spectrometer Frequency | 600.13               |
| 8 Nucleus                | <sup>1</sup> H       |

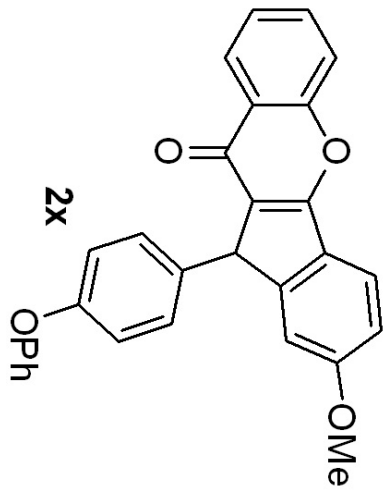

- 8.28
- 8.27
- 8.26
- 8.26
- 7.79
- 7.78
- 7.62
- 7.62
- 7.42
- 7.32
- 7.31
- 7.30
- 7.29
- 7.26
- 7.19
- 7.18
- 7.07
- 7.02
- 7.01
- 7.01
- 7.00
- 6.94
- 6.94
- 6.92
- 6.90
- 5.10

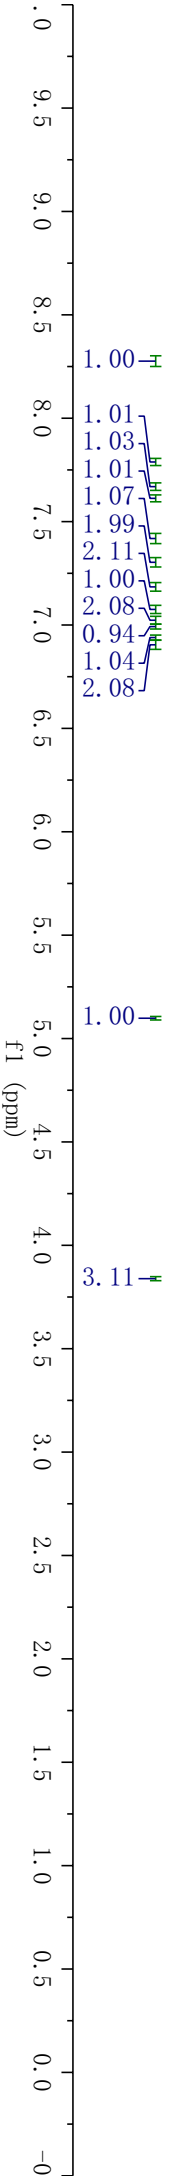

| Parameter                | Value               |
|--------------------------|---------------------|
| 1 Origin                 | Bruker BioSpin GmbH |
| 2 Owner                  | nmr                 |
| 3 Spectrometer           | spect               |
| 4 Solvent                | CDCl3               |
| 5 Temperature            | 297.9               |
| 6 Number of Scans        | 241                 |
| 7 Spectrometer Frequency | 150.90              |
| 8 Nucleus                | <sup>13</sup> C     |

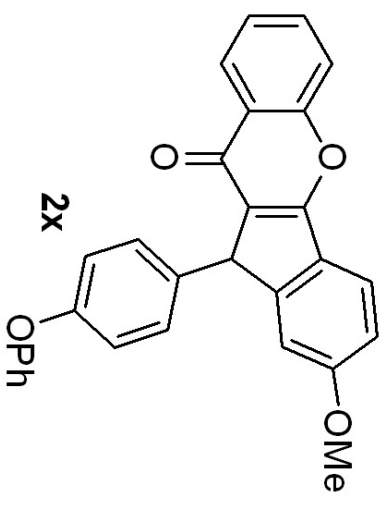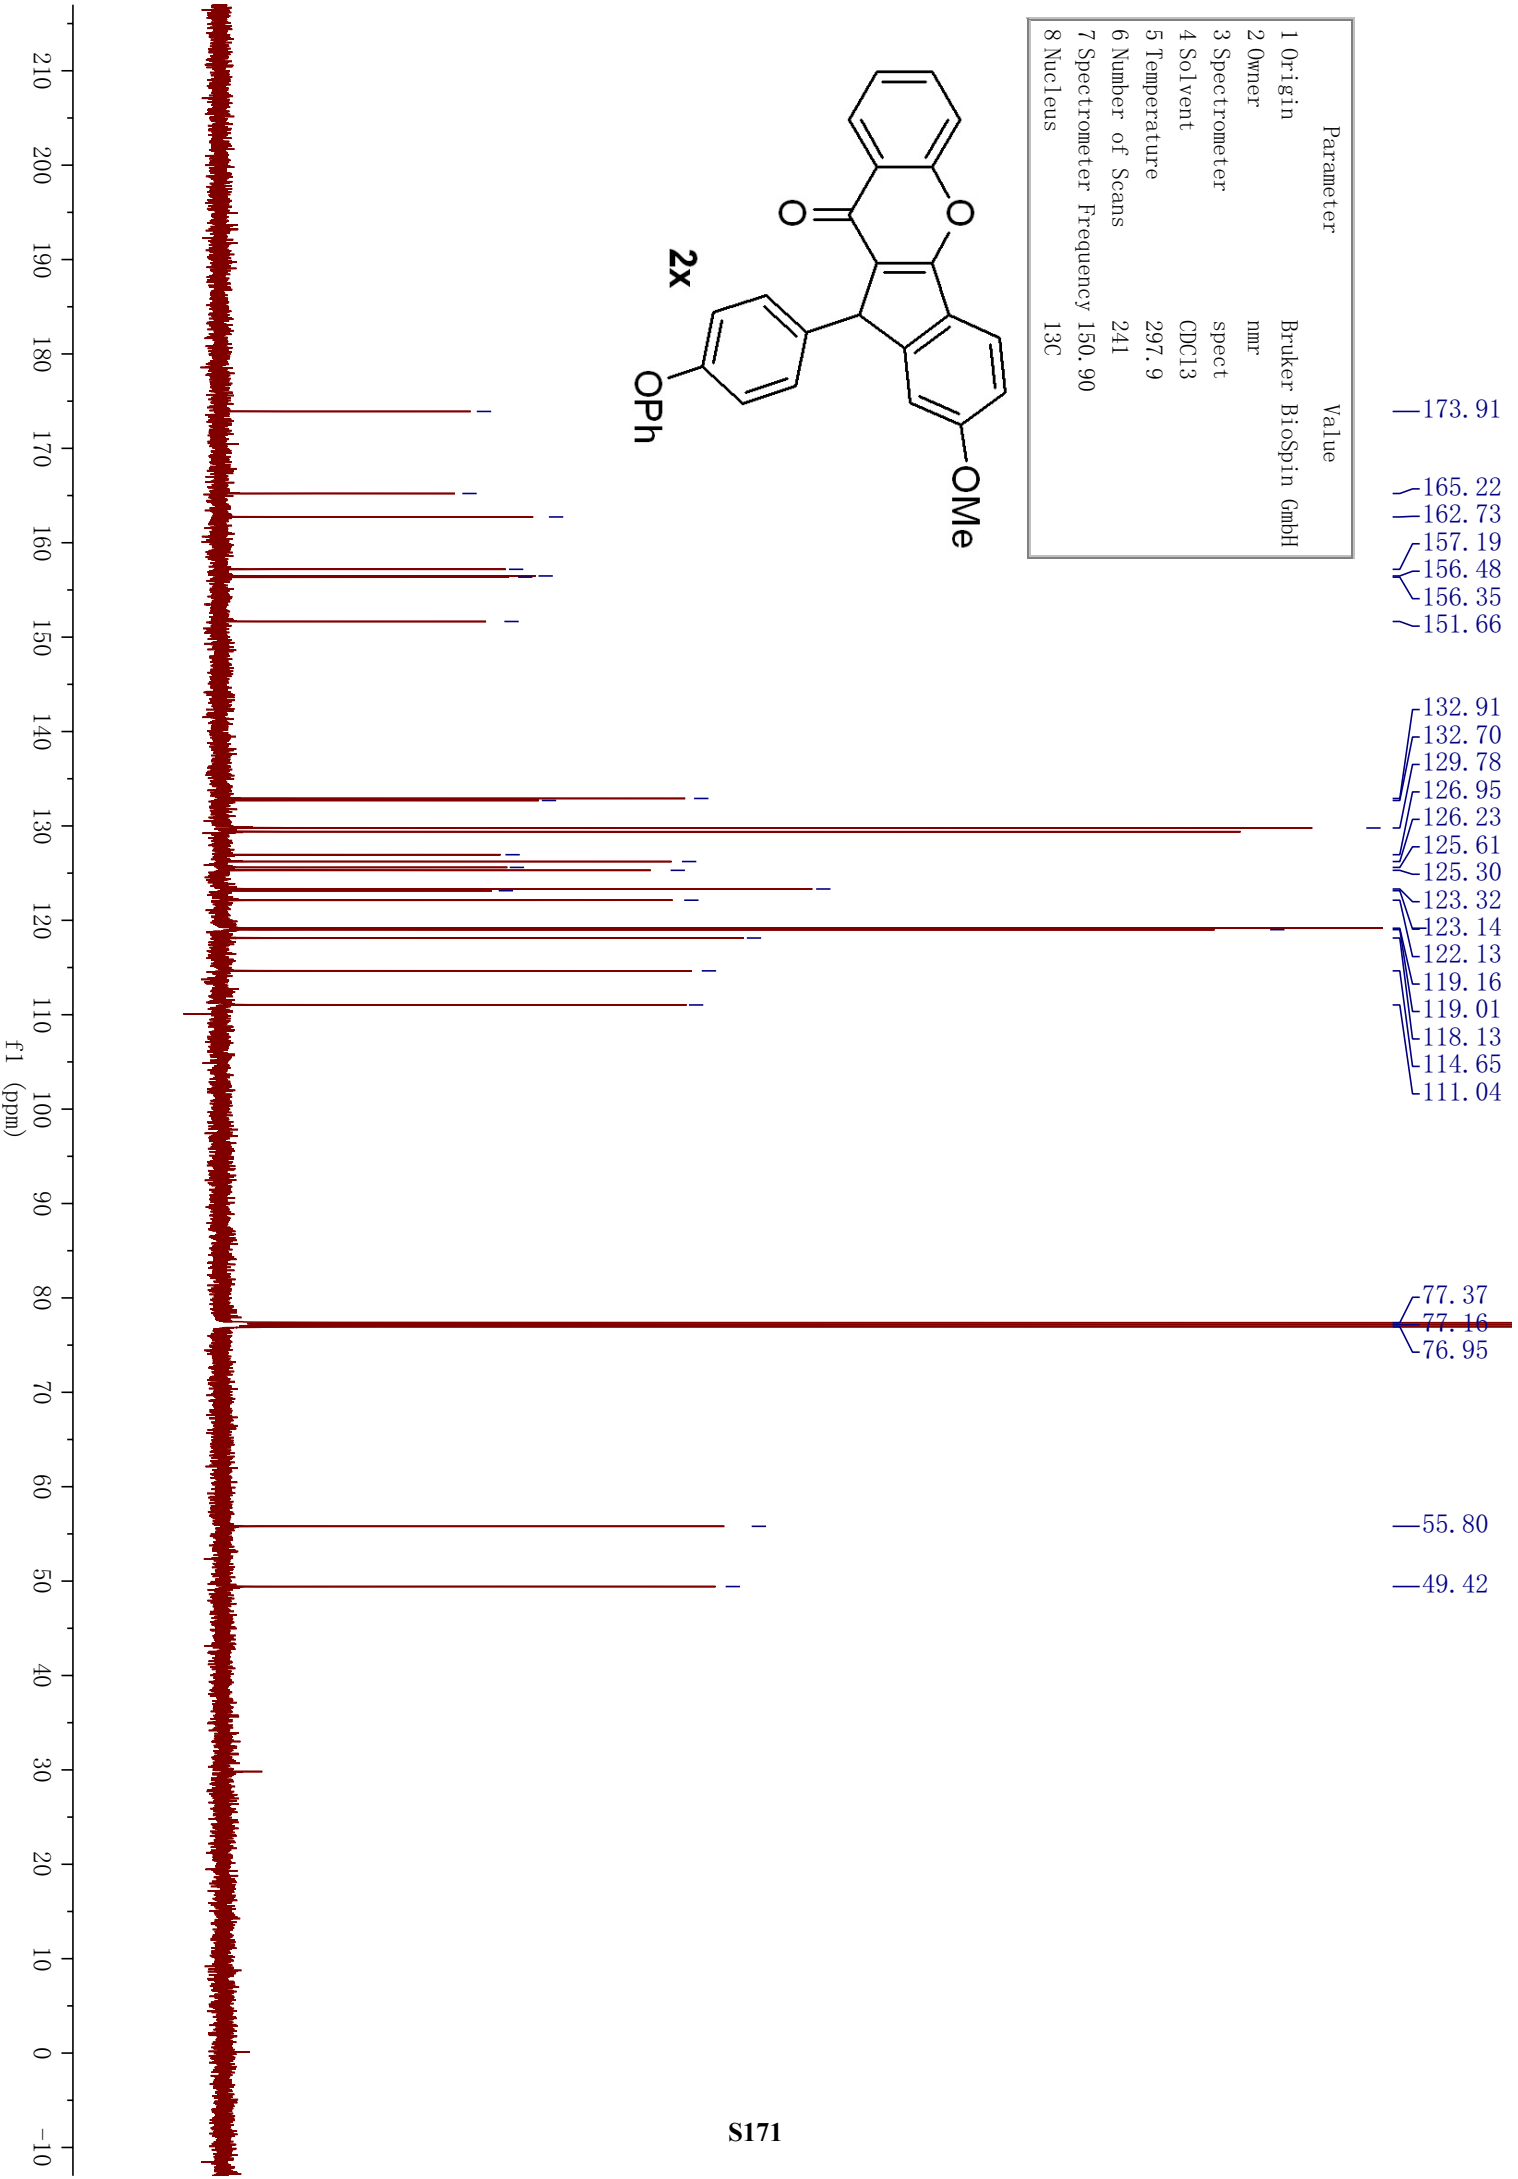



| Parameter                | Value                |
|--------------------------|----------------------|
| 1 Origin                 | Brucker Biospin GmbH |
| 2 Owner                  | nmr                  |
| 3 Spectrometer           | spect                |
| 4 Solvent                | CDCl3                |
| 5 Temperature            | 297.9                |
| 6 Number of Scans        | 16                   |
| 7 Spectrometer Frequency | 600.13               |
| 8 Nucleus                | <sup>1</sup> H       |

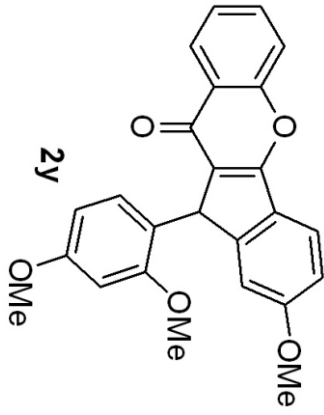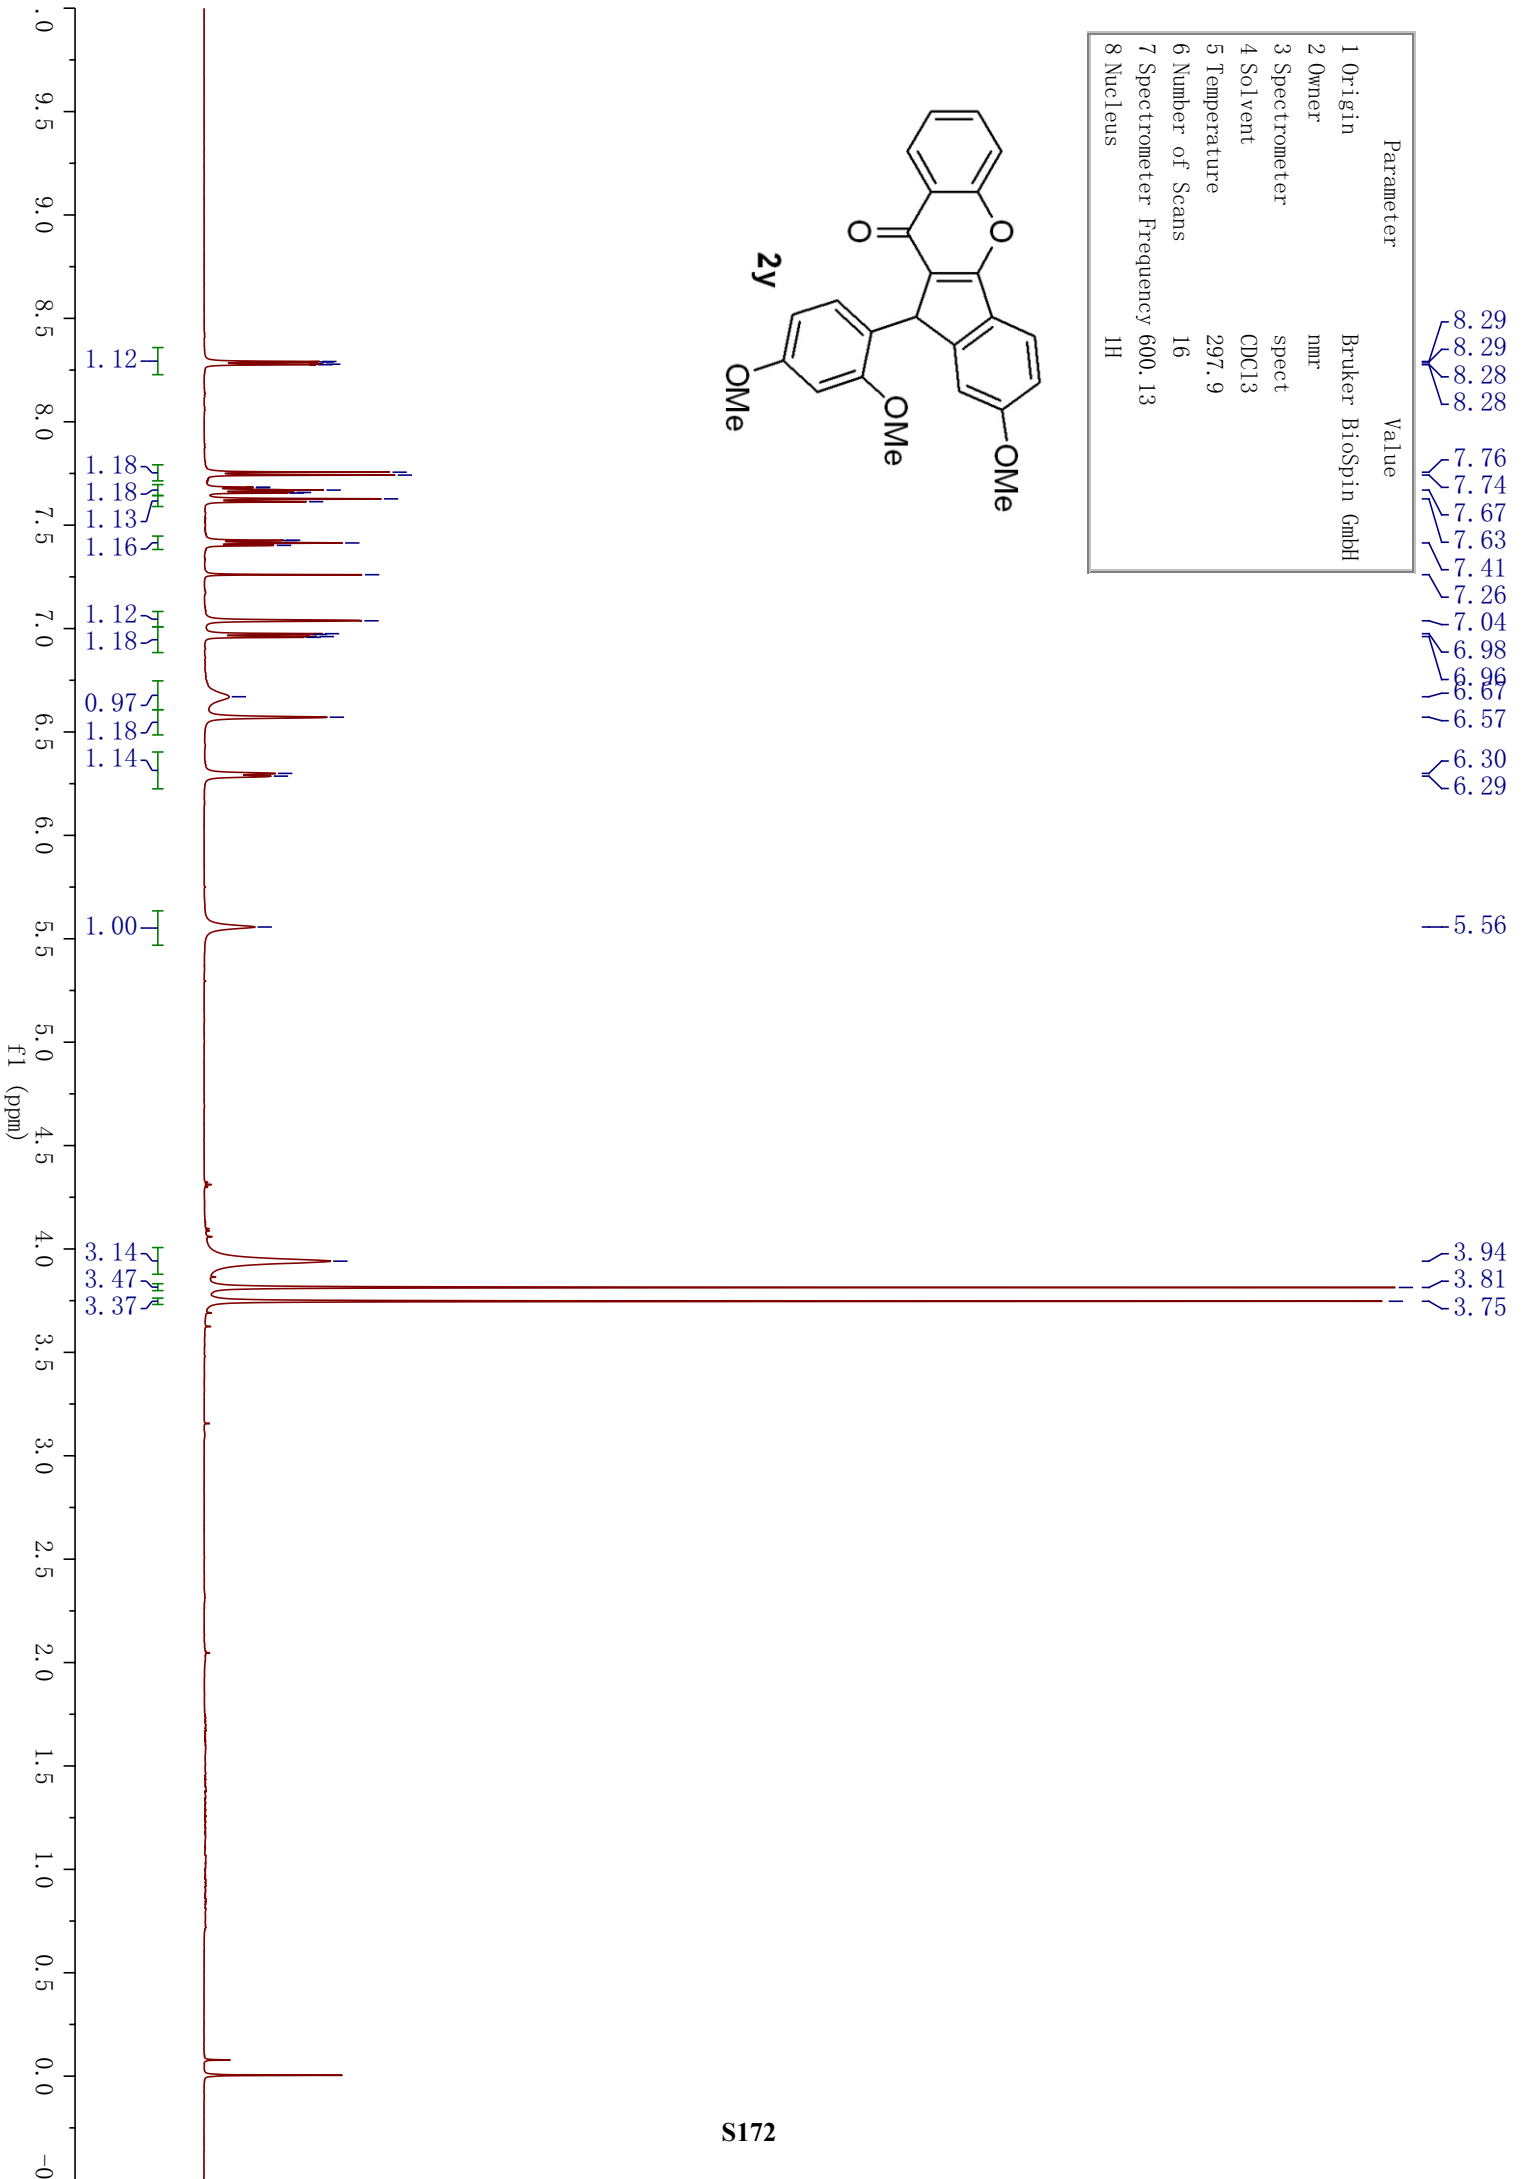

| Parameter                | Value                |
|--------------------------|----------------------|
| 1 Origin                 | Brucker BioSpin GmbH |
| 2 Owner                  | nmr                  |
| 3 Spectrometer           | spect                |
| 4 Solvent                | CDCl3                |
| 5 Temperature            | 297.9                |
| 6 Number of Scans        | 275                  |
| 7 Spectrometer Frequency | 150.90               |
| 8 Nucleus                | <sup>13</sup> C      |

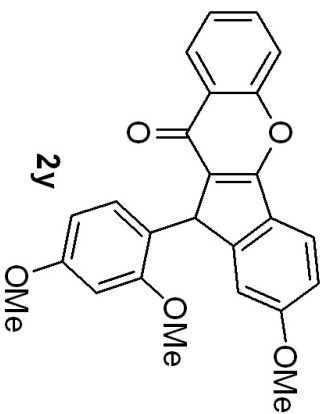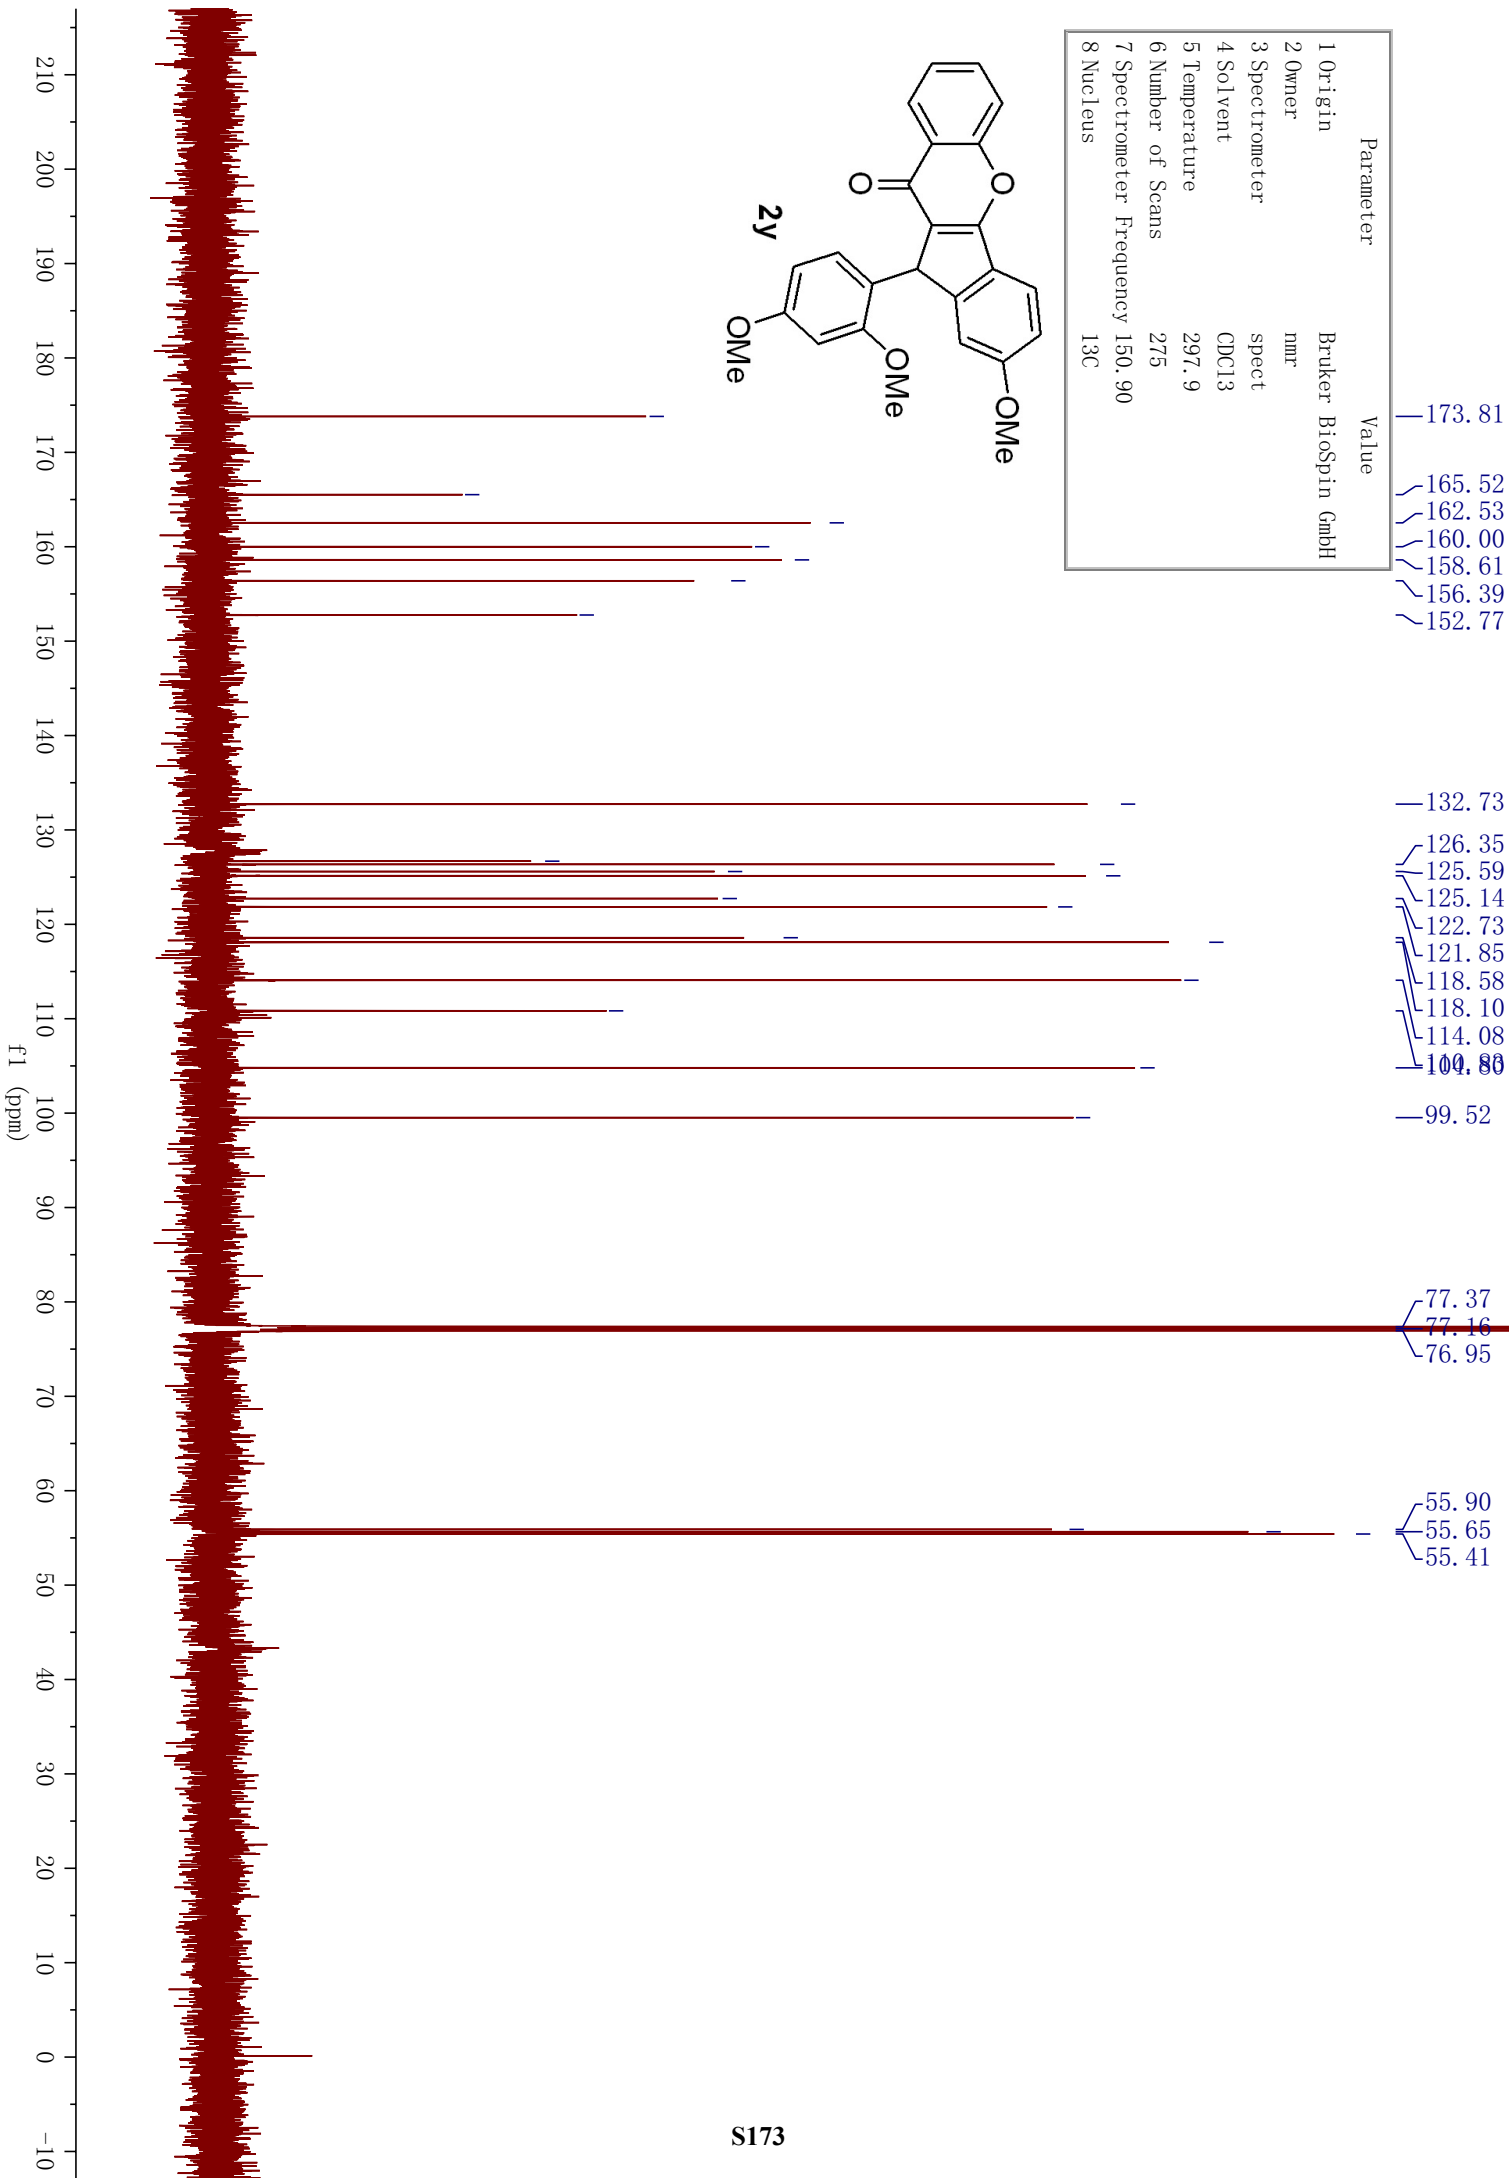

| Parameter                | Value                |
|--------------------------|----------------------|
| 1 Origin                 | Brucker BioSpin GmbH |
| 2 Owner                  | nmr                  |
| 3 Spectrometer           | spect                |
| 4 Solvent                | DMSO                 |
| 5 Temperature            | 297.9                |
| 6 Number of Scans        | 16                   |
| 7 Spectrometer Frequency | 600.13               |
| 8 Nucleus                | <sup>1</sup> H       |

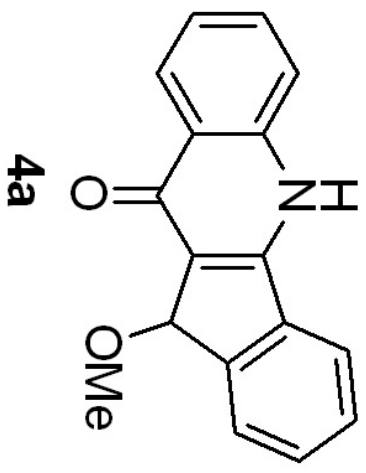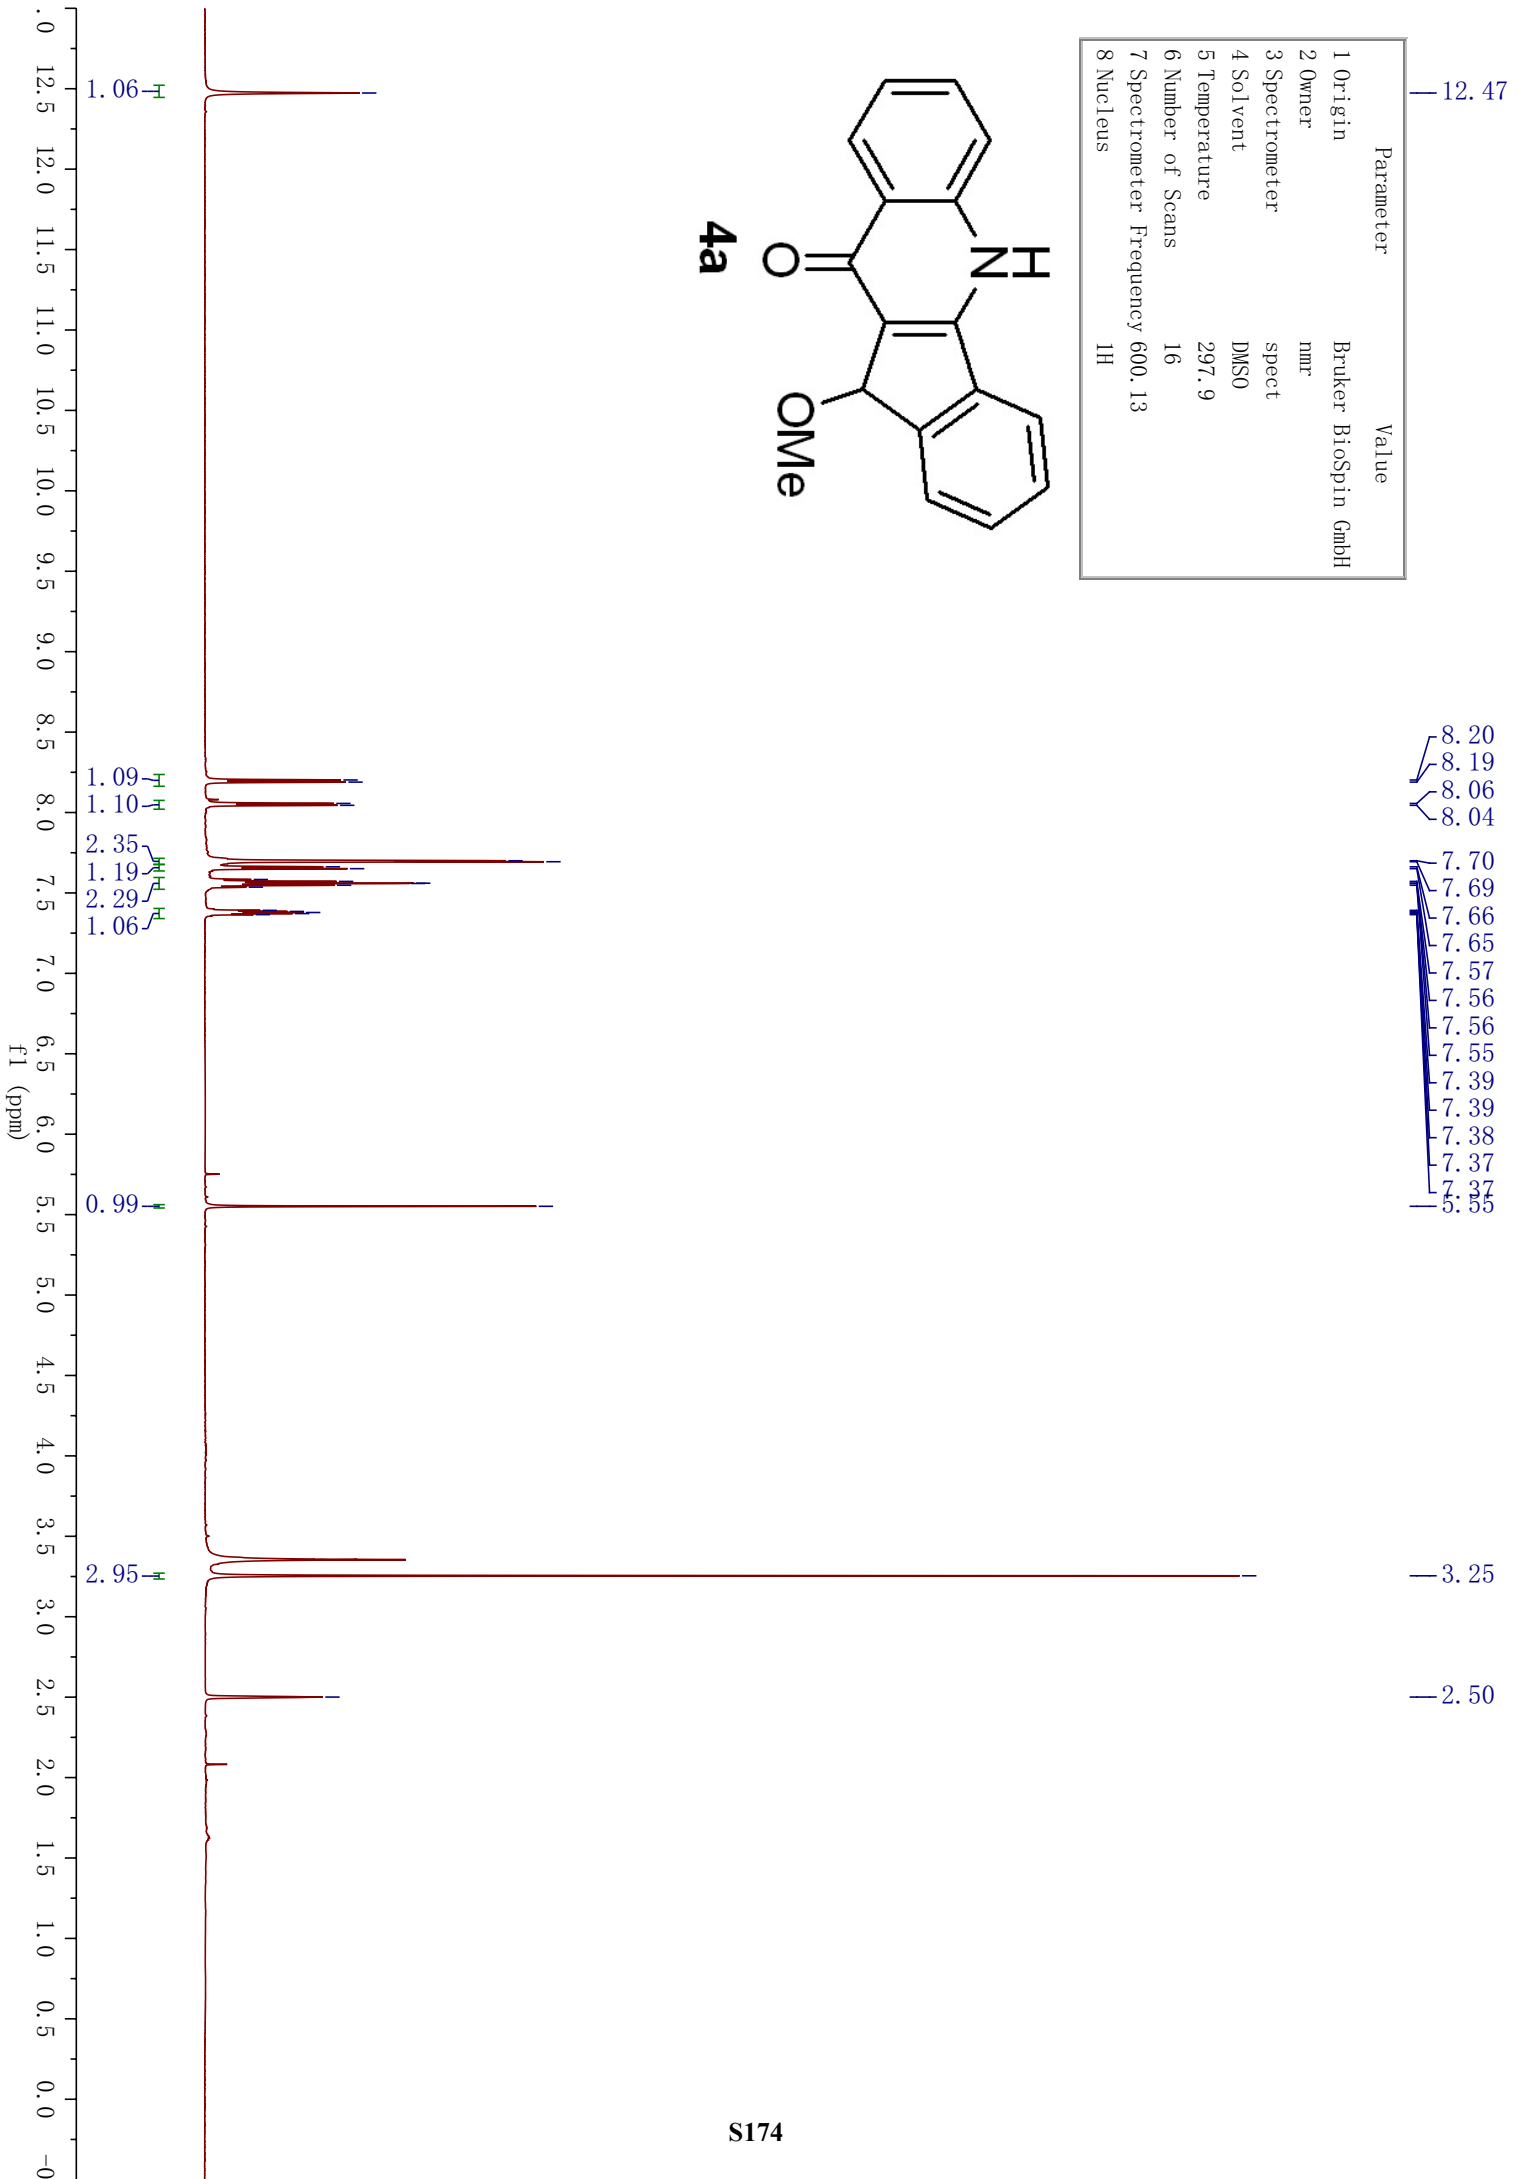

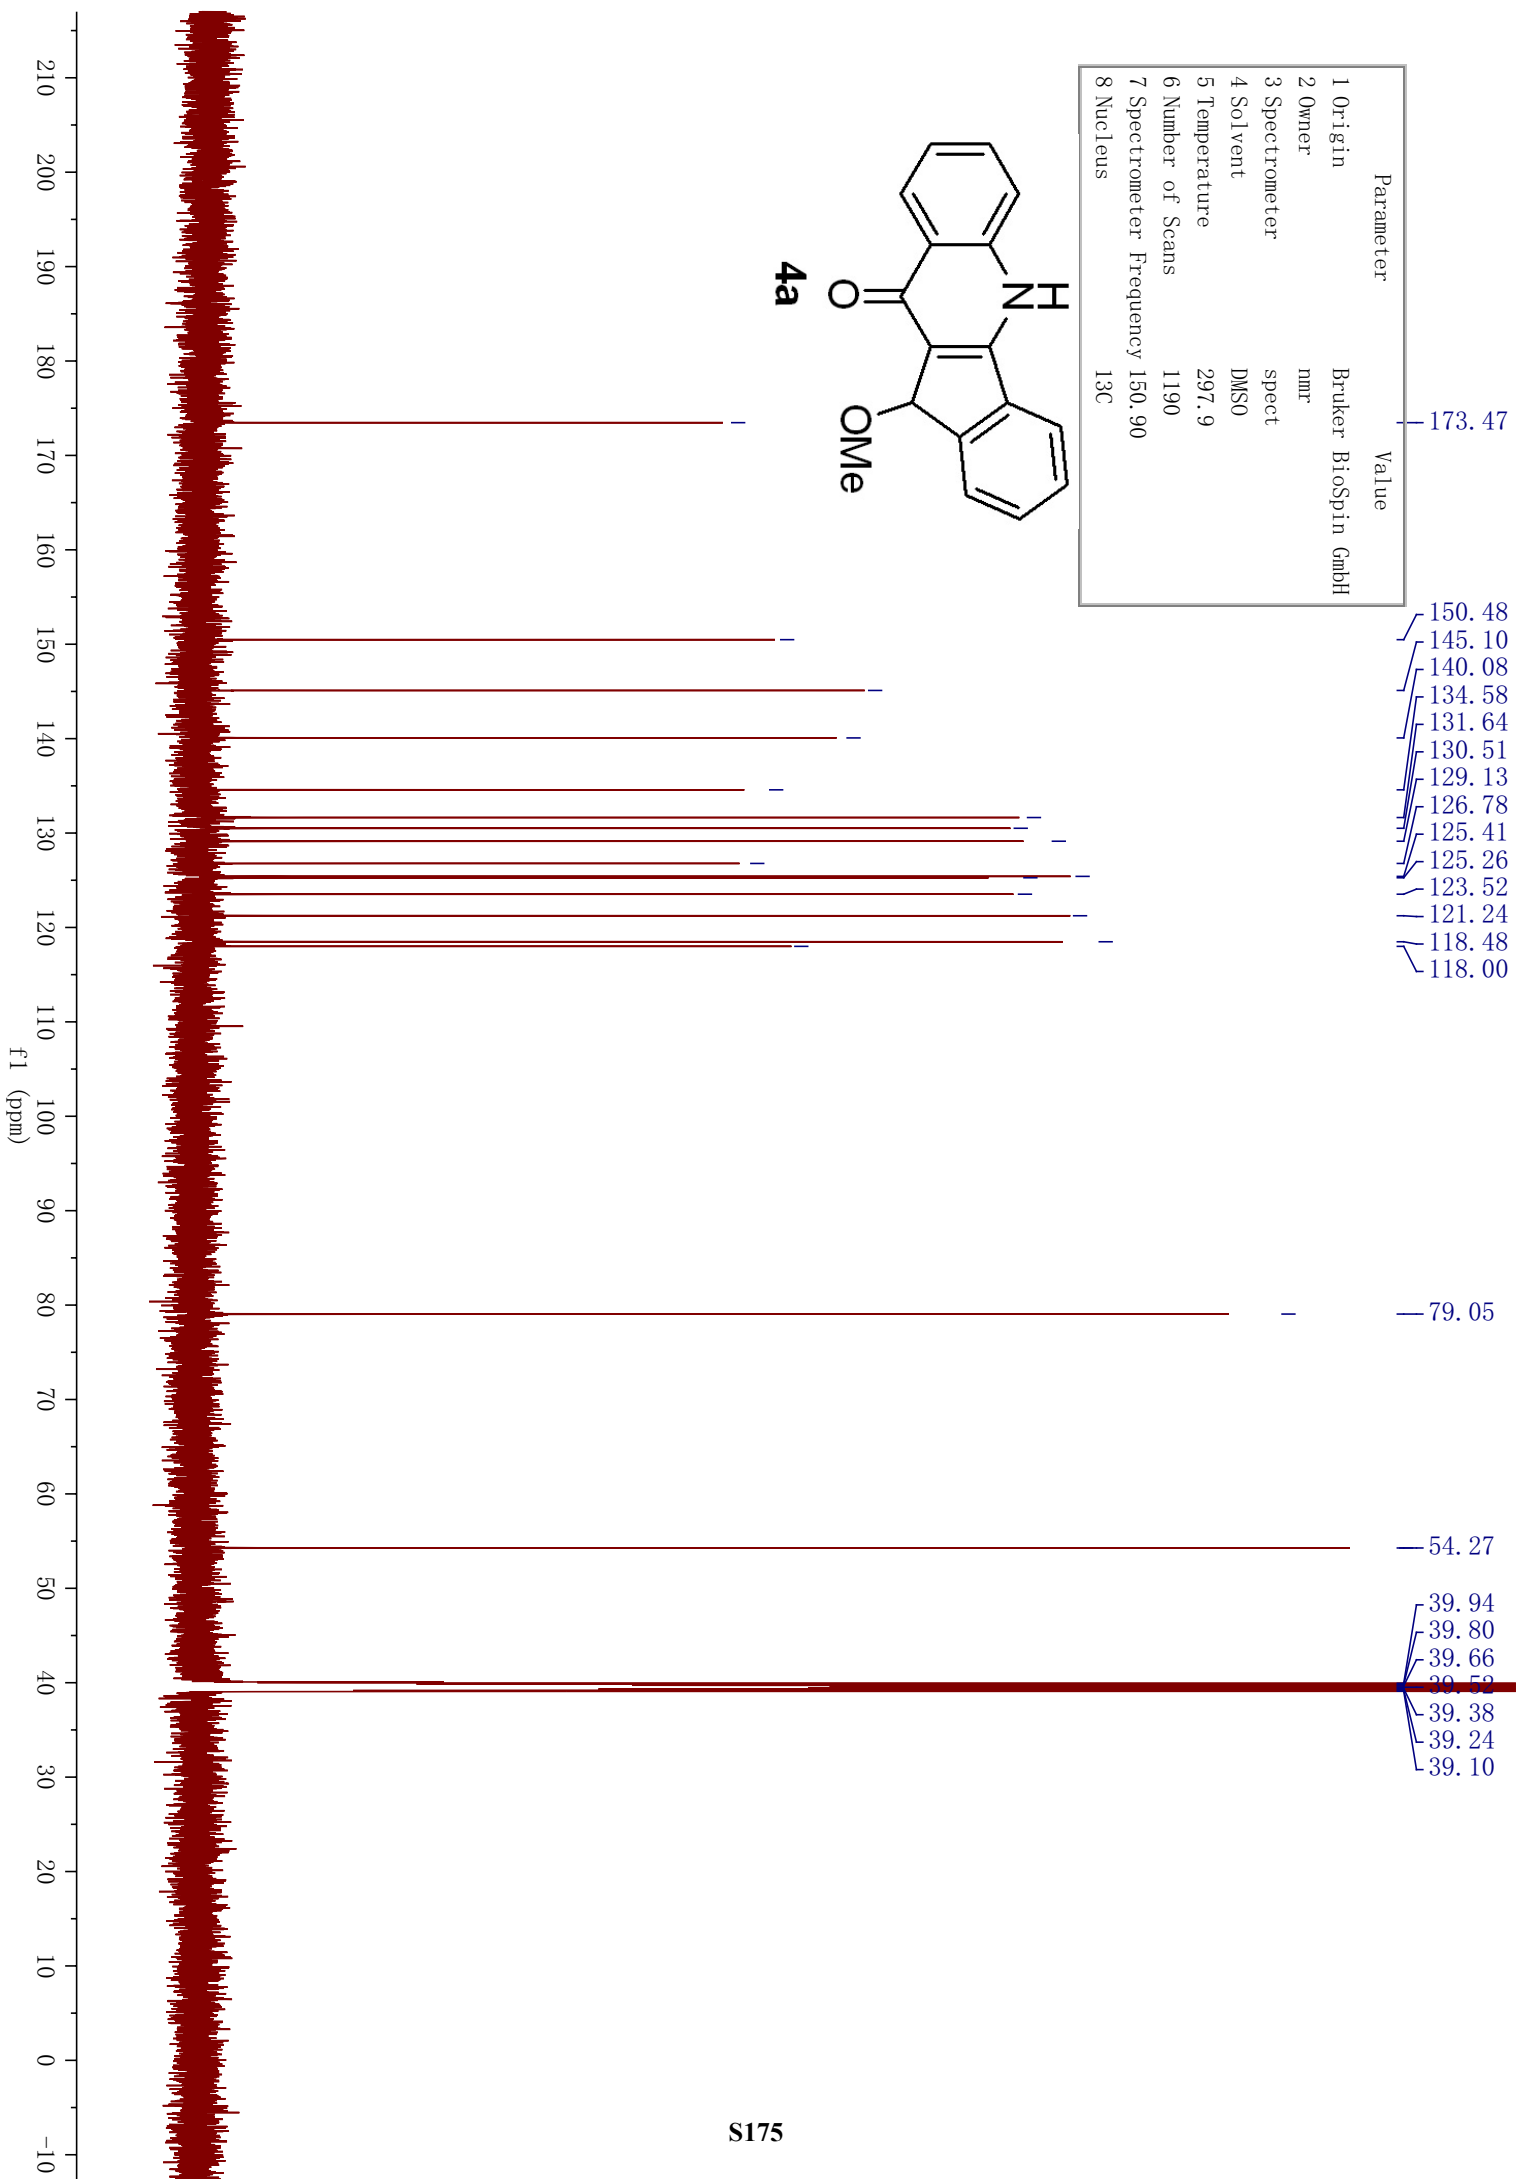

| Parameter                | Value               |
|--------------------------|---------------------|
| 1 Origin                 | Brüker Biospin GmbH |
| 2 Owner                  | nmr                 |
| 3 Spectrometer           | spect               |
| 4 Solvent                | DMSO                |
| 5 Temperature            | 297.9               |
| 6 Number of Scans        | 16                  |
| 7 Spectrometer Frequency | 600.13              |
| 8 Nucleus                | <sup>1</sup> H      |

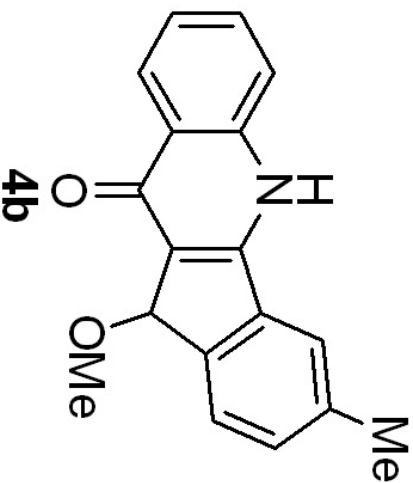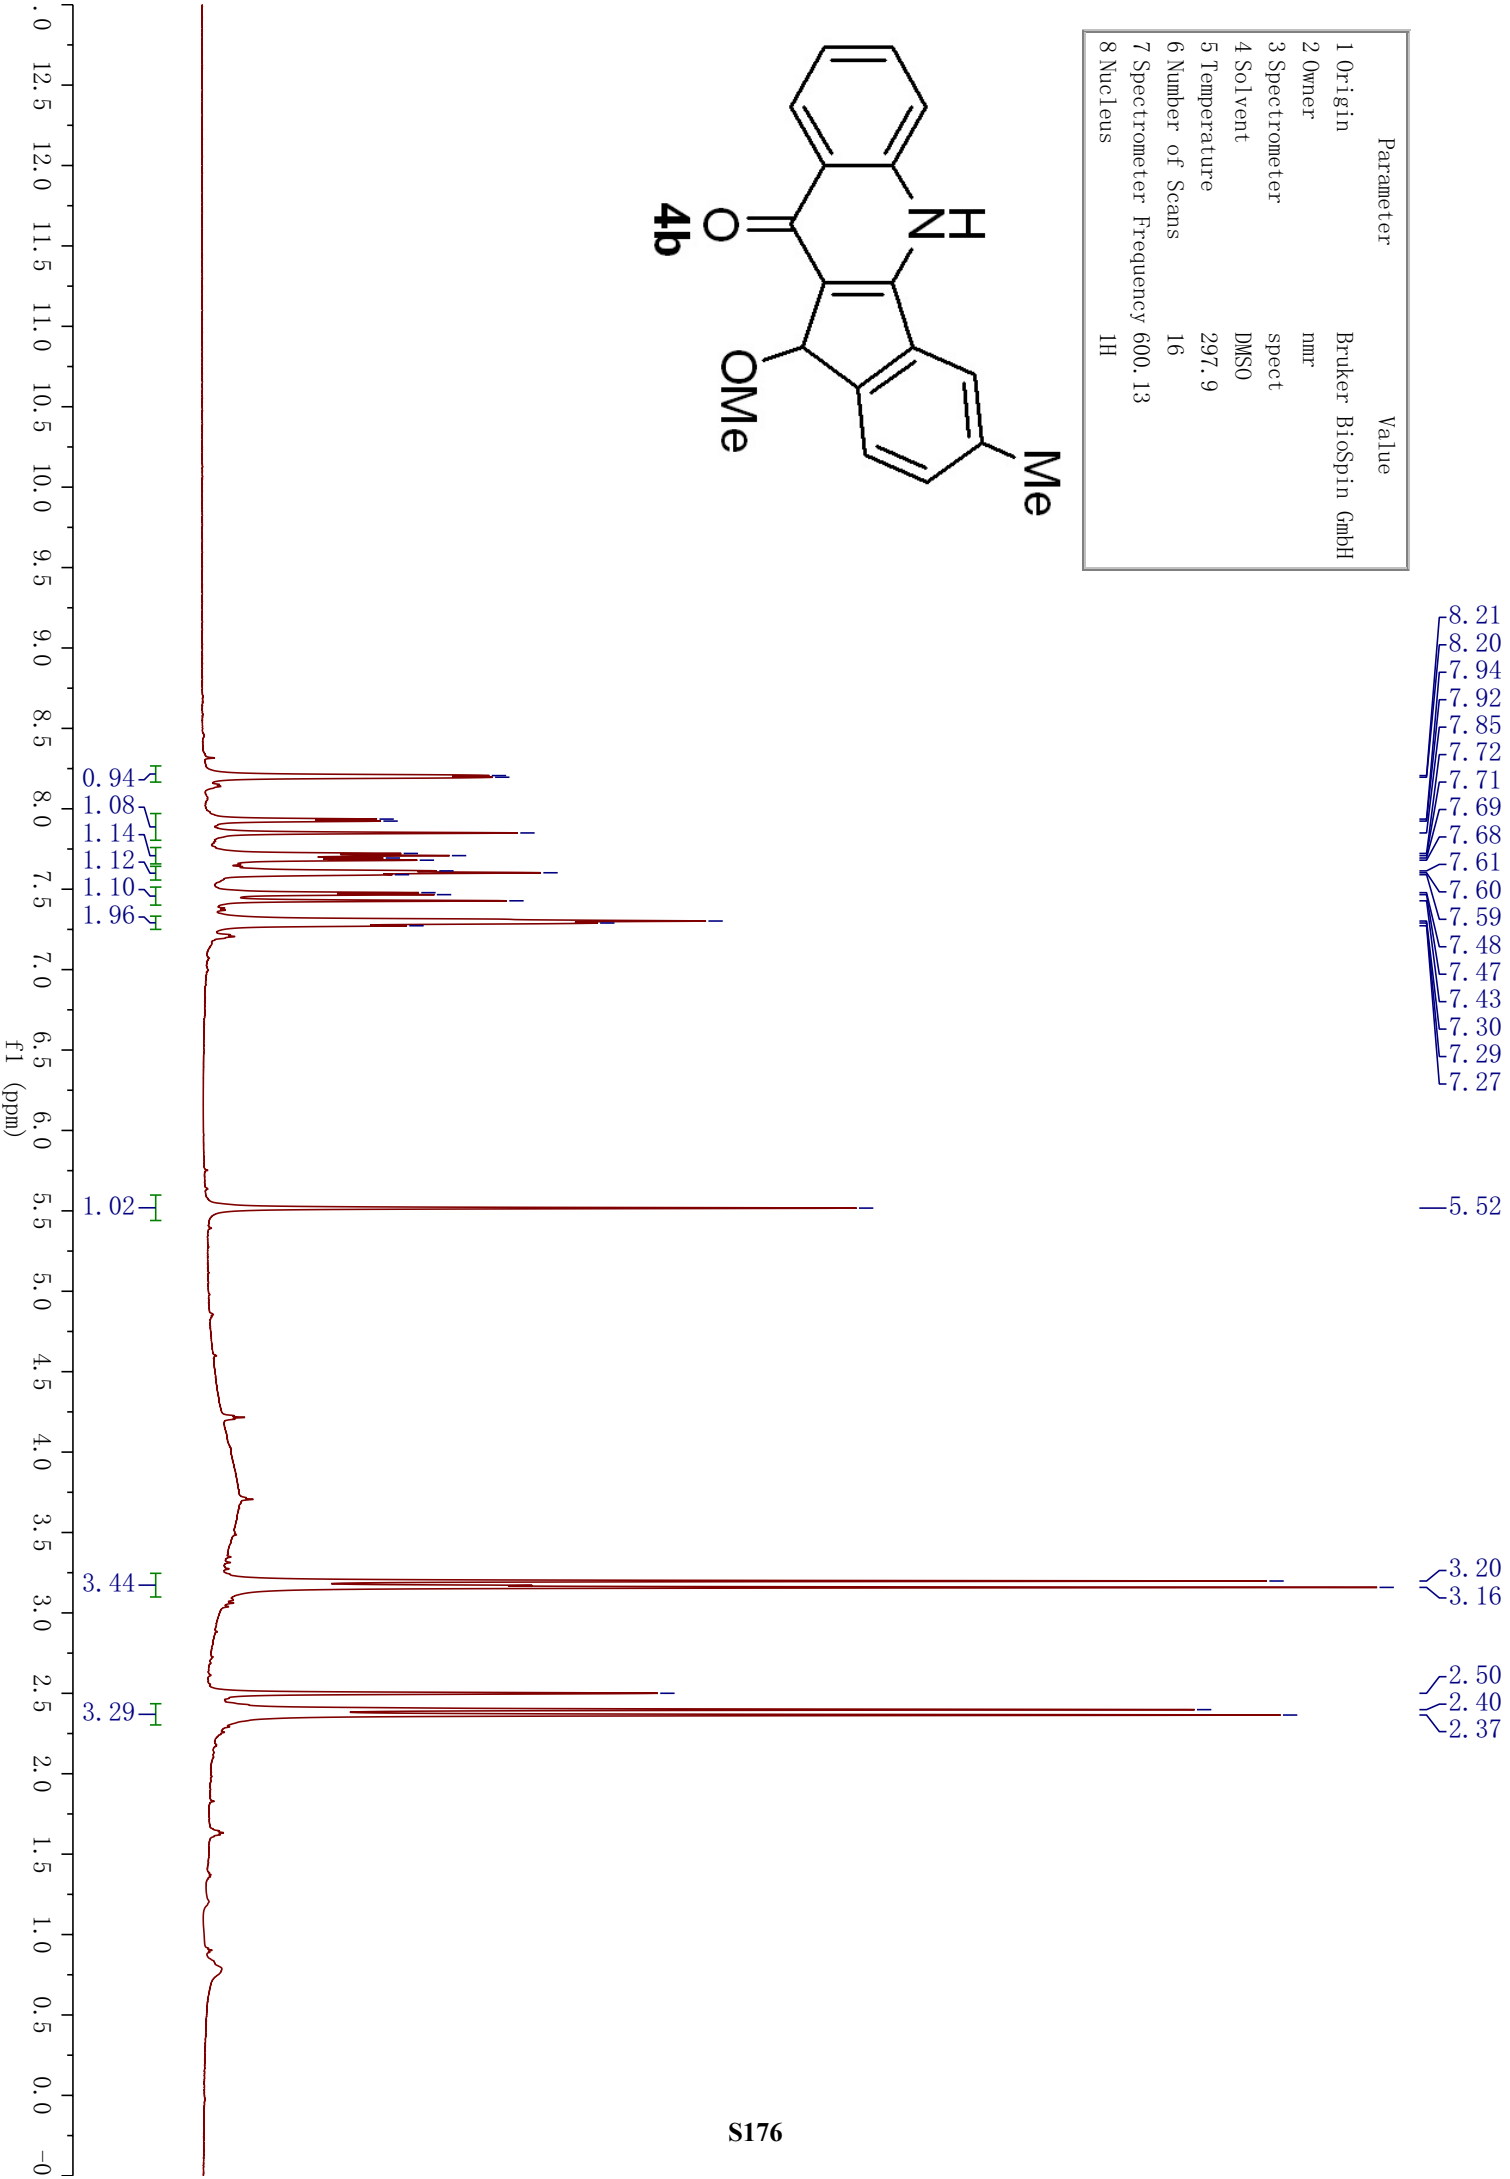

| Parameter                | Value                |
|--------------------------|----------------------|
| 1 Origin                 | Brucker Biospin GmbH |
| 2 Owner                  | nmr                  |
| 3 Spectrometer           | spect                |
| 4 Solvent                | DMSO                 |
| 5 Temperature            | 297.9                |
| 6 Number of Scans        | 4477                 |
| 7 Spectrometer Frequency | 150.90               |
| 8 Nucleus                | <sup>13</sup> C      |

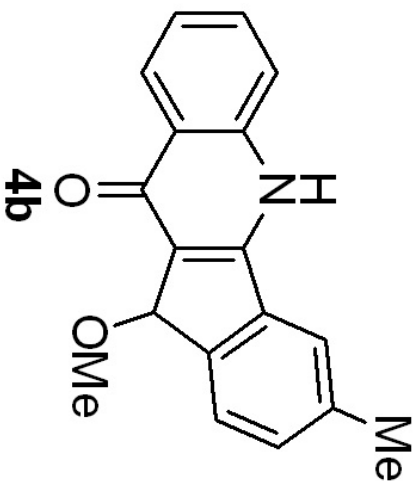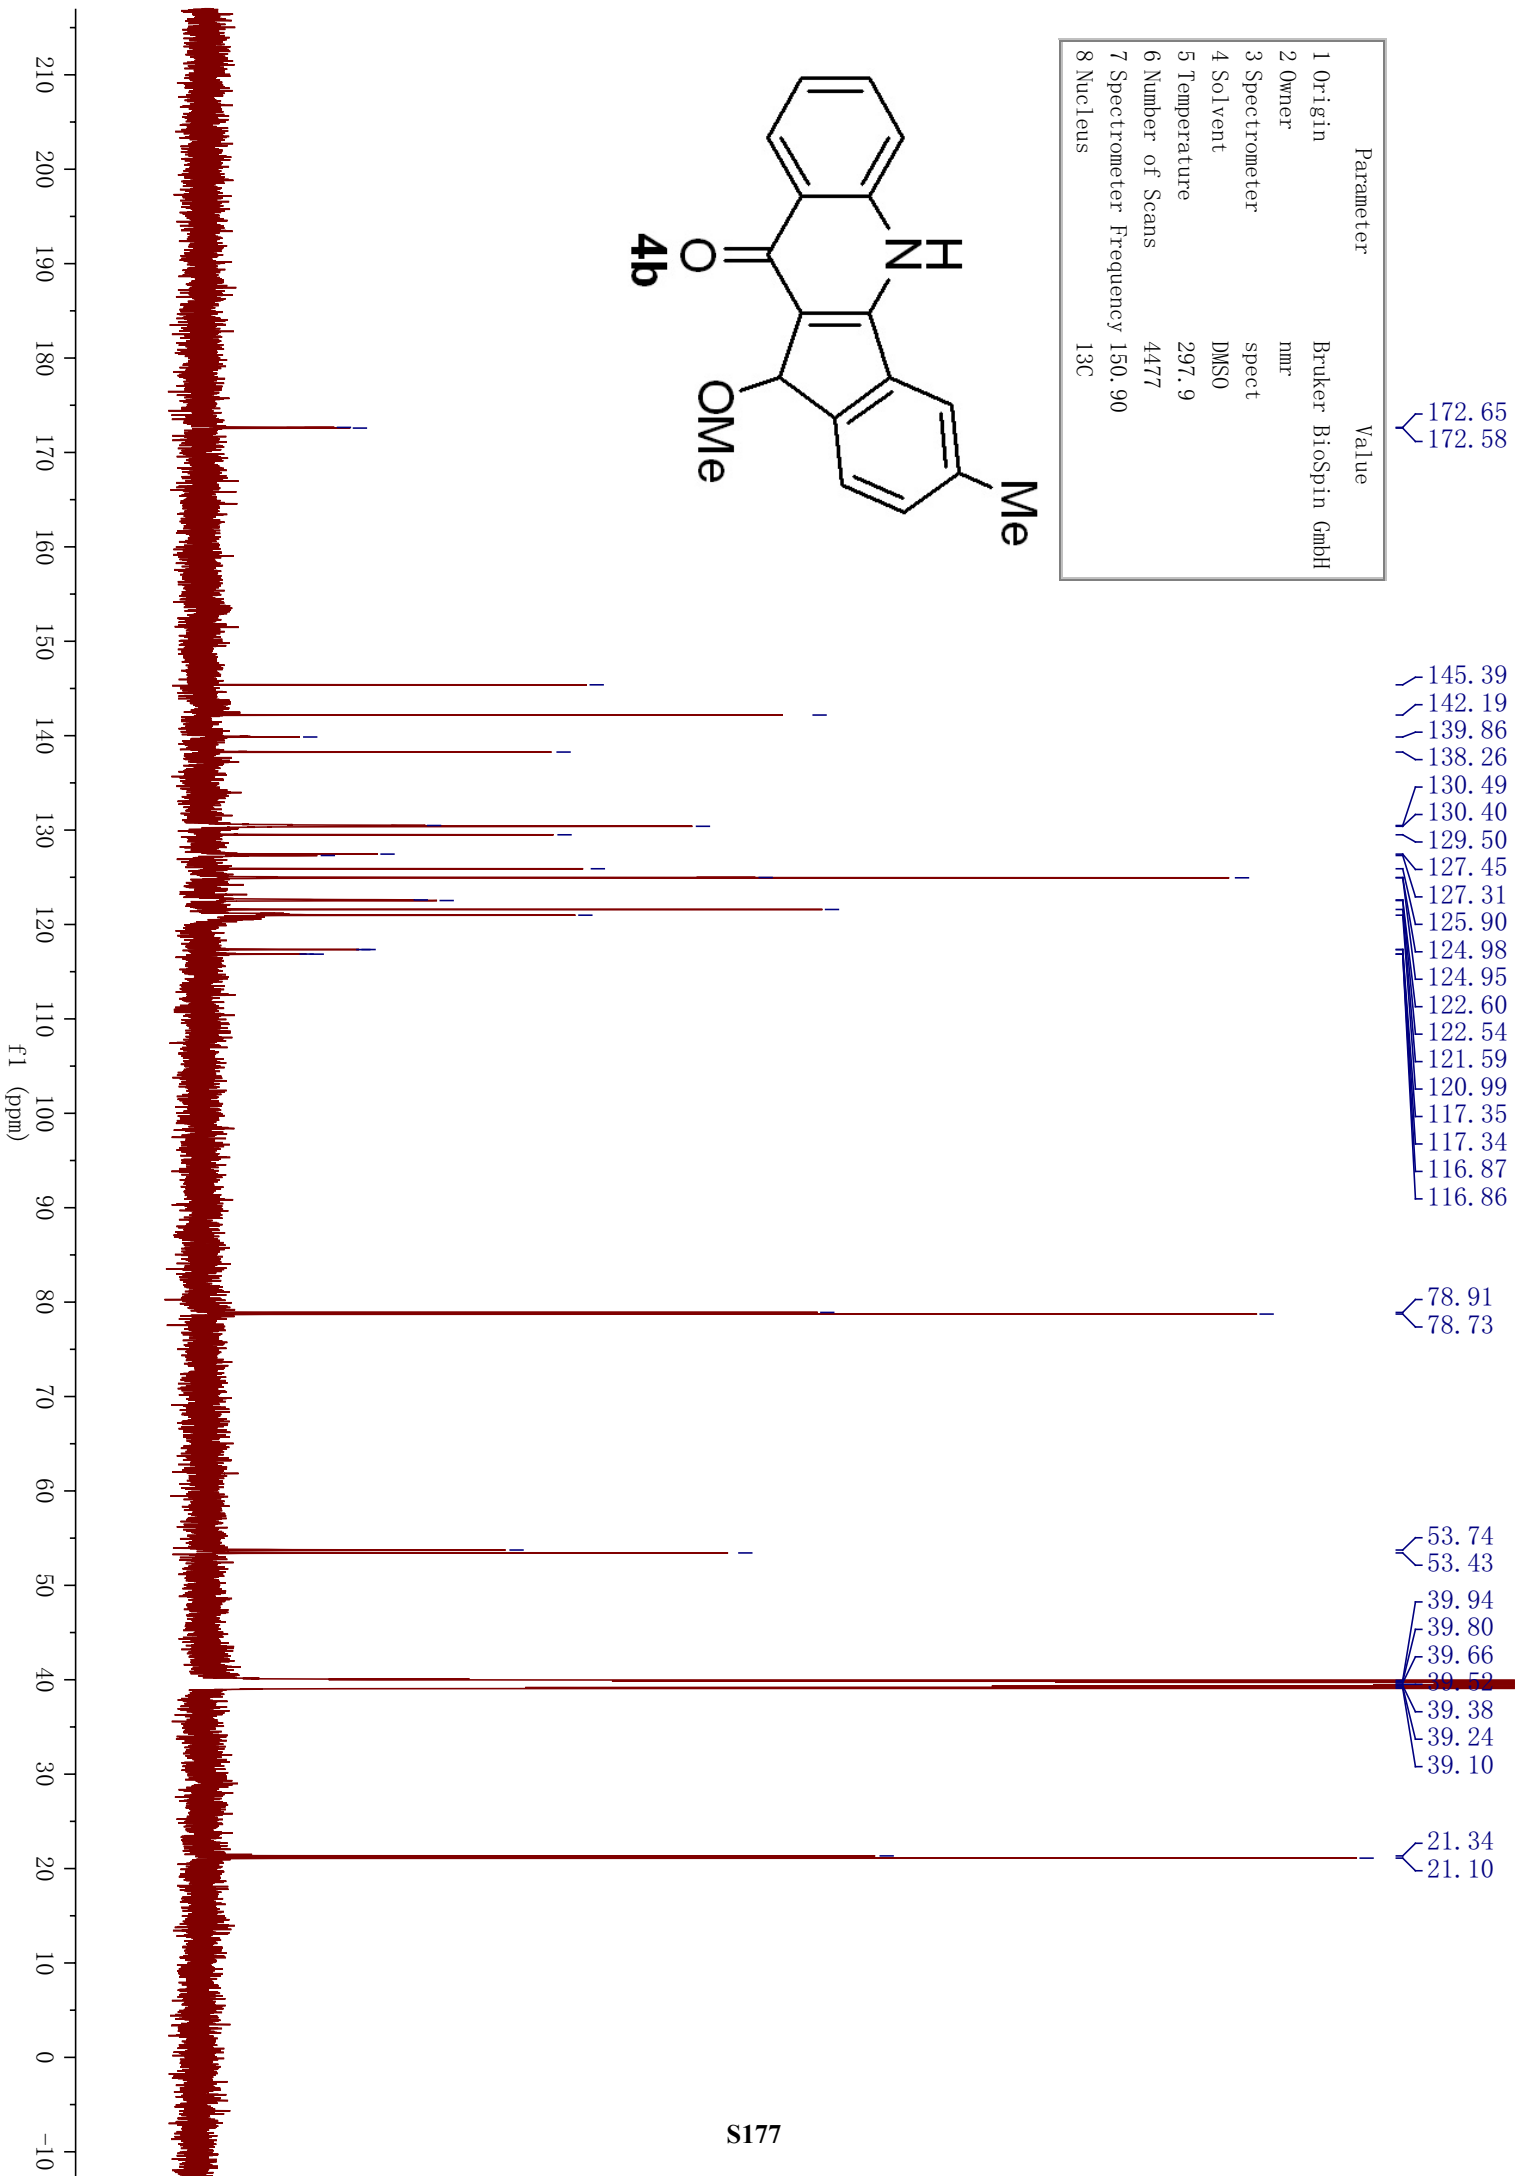

12.40  
12.36

8.20  
8.18  
8.17  
7.95  
7.94  
7.69  
7.68  
7.66  
7.65  
7.64  
7.38  
7.37  
7.36  
7.35  
7.34  
7.19  
7.12  
7.11  
7.08  
7.06

5.49  
5.48

3.86

3.24  
3.21

2.50

| Parameter                | Value                |
|--------------------------|----------------------|
| 1 Origin                 | Brucker Biospin GmbH |
| 2 Owner                  | nmr                  |
| 3 Spectrometer           | spect                |
| 4 Solvent                | DMSO                 |
| 5 Temperature            | 297.9                |
| 6 Number of Scans        | 16                   |
| 7 Spectrometer Frequency | 600.13               |
| 8 Nucleus                | <sup>1</sup> H       |

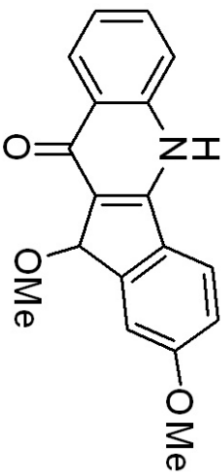

4c

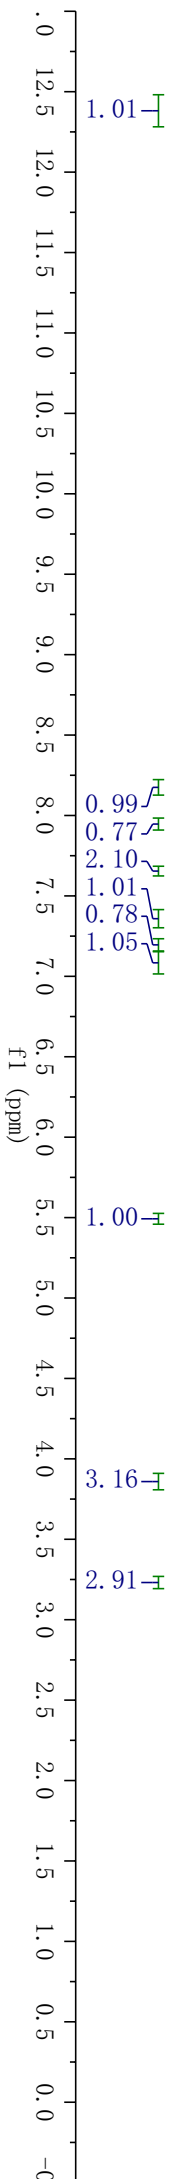

| Parameter                | Value               |
|--------------------------|---------------------|
| 1 Origin                 | Brüker BioSpin GmbH |
| 2 Owner                  | nmr                 |
| 3 Spectrometer           | spect               |
| 4 Solvent                | DMSO                |
| 5 Temperature            | 298.0               |
| 6 Number of Scans        | 612                 |
| 7 Spectrometer Frequency | 150.90              |
| 8 Nucleus                | <sup>13</sup> C     |

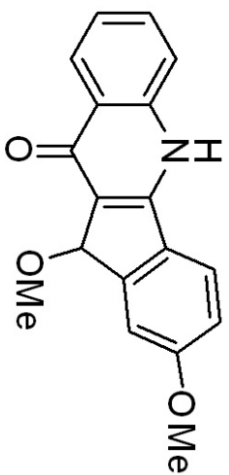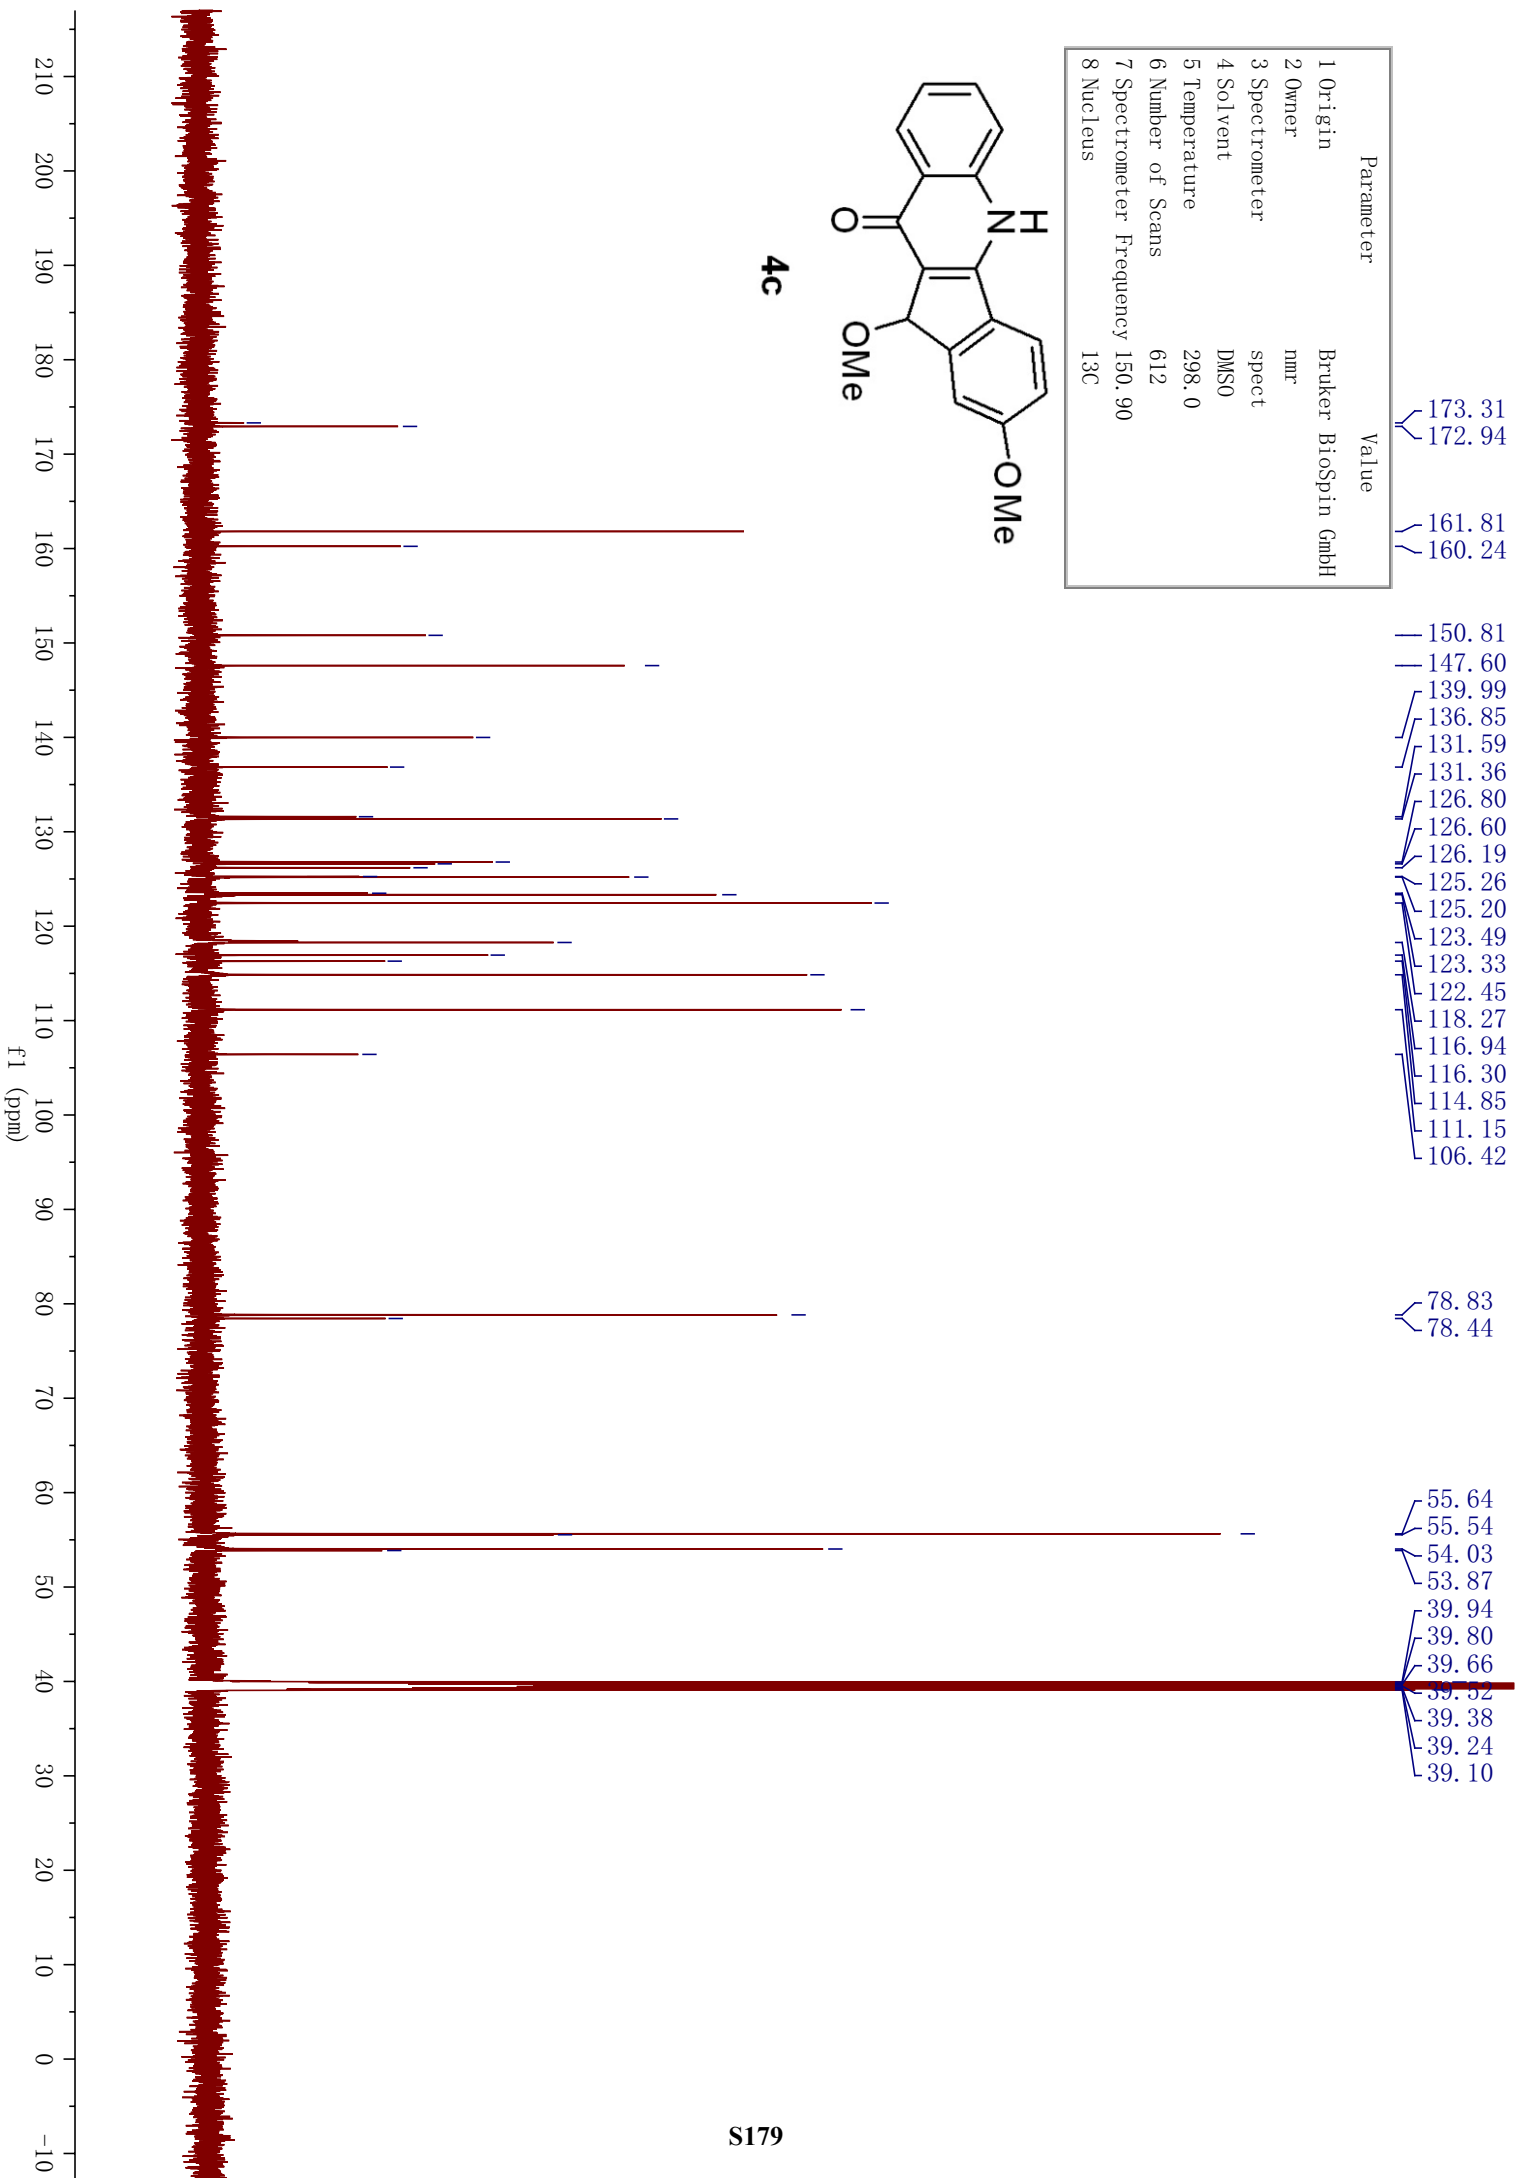



12.52

- 8.20
- 8.19
- 8.18
- 8.18
- 8.09
- 8.08
- 8.07
- 8.06
- 7.88
- 7.88
- 7.87
- 7.87
- 7.70
- 7.69
- 7.68
- 7.66
- 7.65
- 7.62
- 7.43
- 7.43
- 7.41
- 7.40
- 7.40
- 7.38
- 7.37
- 7.34
- 5.54
- 5.53

| Parameter                | Value                |
|--------------------------|----------------------|
| 1 Origin                 | Brucker BioSpin GmbH |
| 2 Owner                  | nmr                  |
| 3 Spectrometer           | spect                |
| 4 Solvent                | DMSO                 |
| 5 Temperature            | 297.9                |
| 6 Number of Scans        | 16                   |
| 7 Spectrometer Frequency | 600.13               |
| 8 Nucleus                | <sup>1</sup> H       |

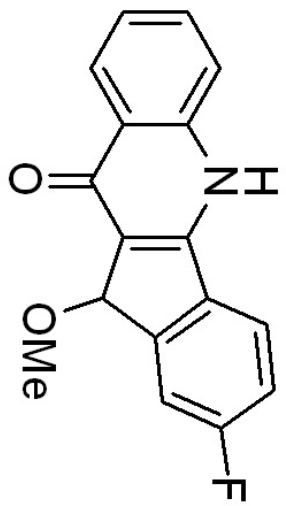

4d

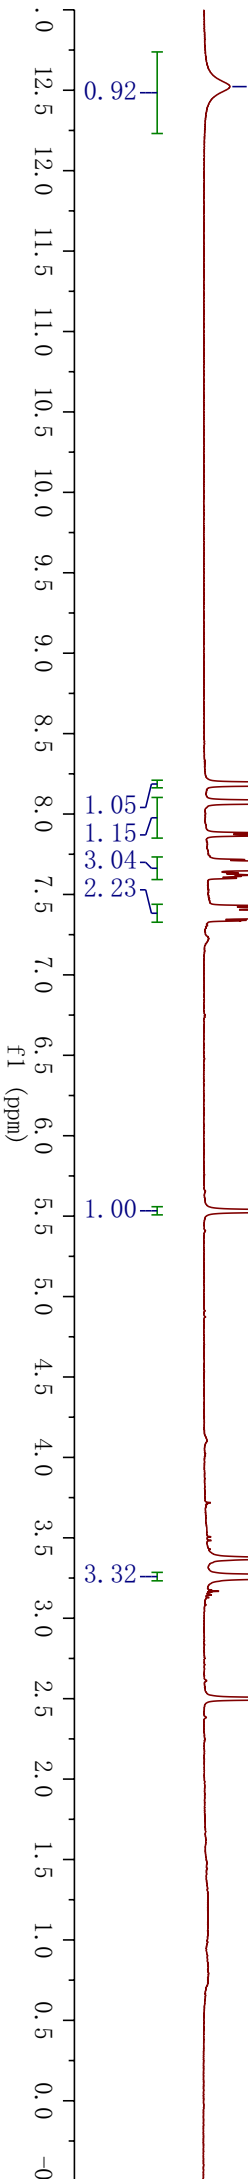

3.27  
3.25  
2.50

| Parameter                | Value                |
|--------------------------|----------------------|
| 1 Origin                 | Brucker Biospin GmbH |
| 2 Owner                  | nmr                  |
| 3 Spectrometer           | spect                |
| 4 Solvent                | DMSO                 |
| 5 Temperature            | 297.9                |
| 6 Number of Scans        | 1758                 |
| 7 Spectrometer Frequency | 150.90               |
| 8 Nucleus                | <sup>13</sup> C      |

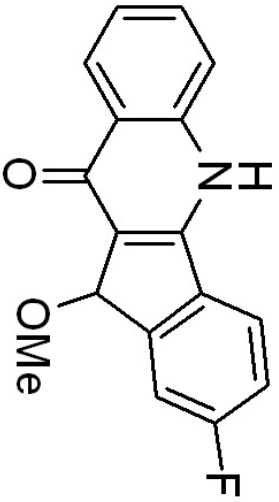

**4d**

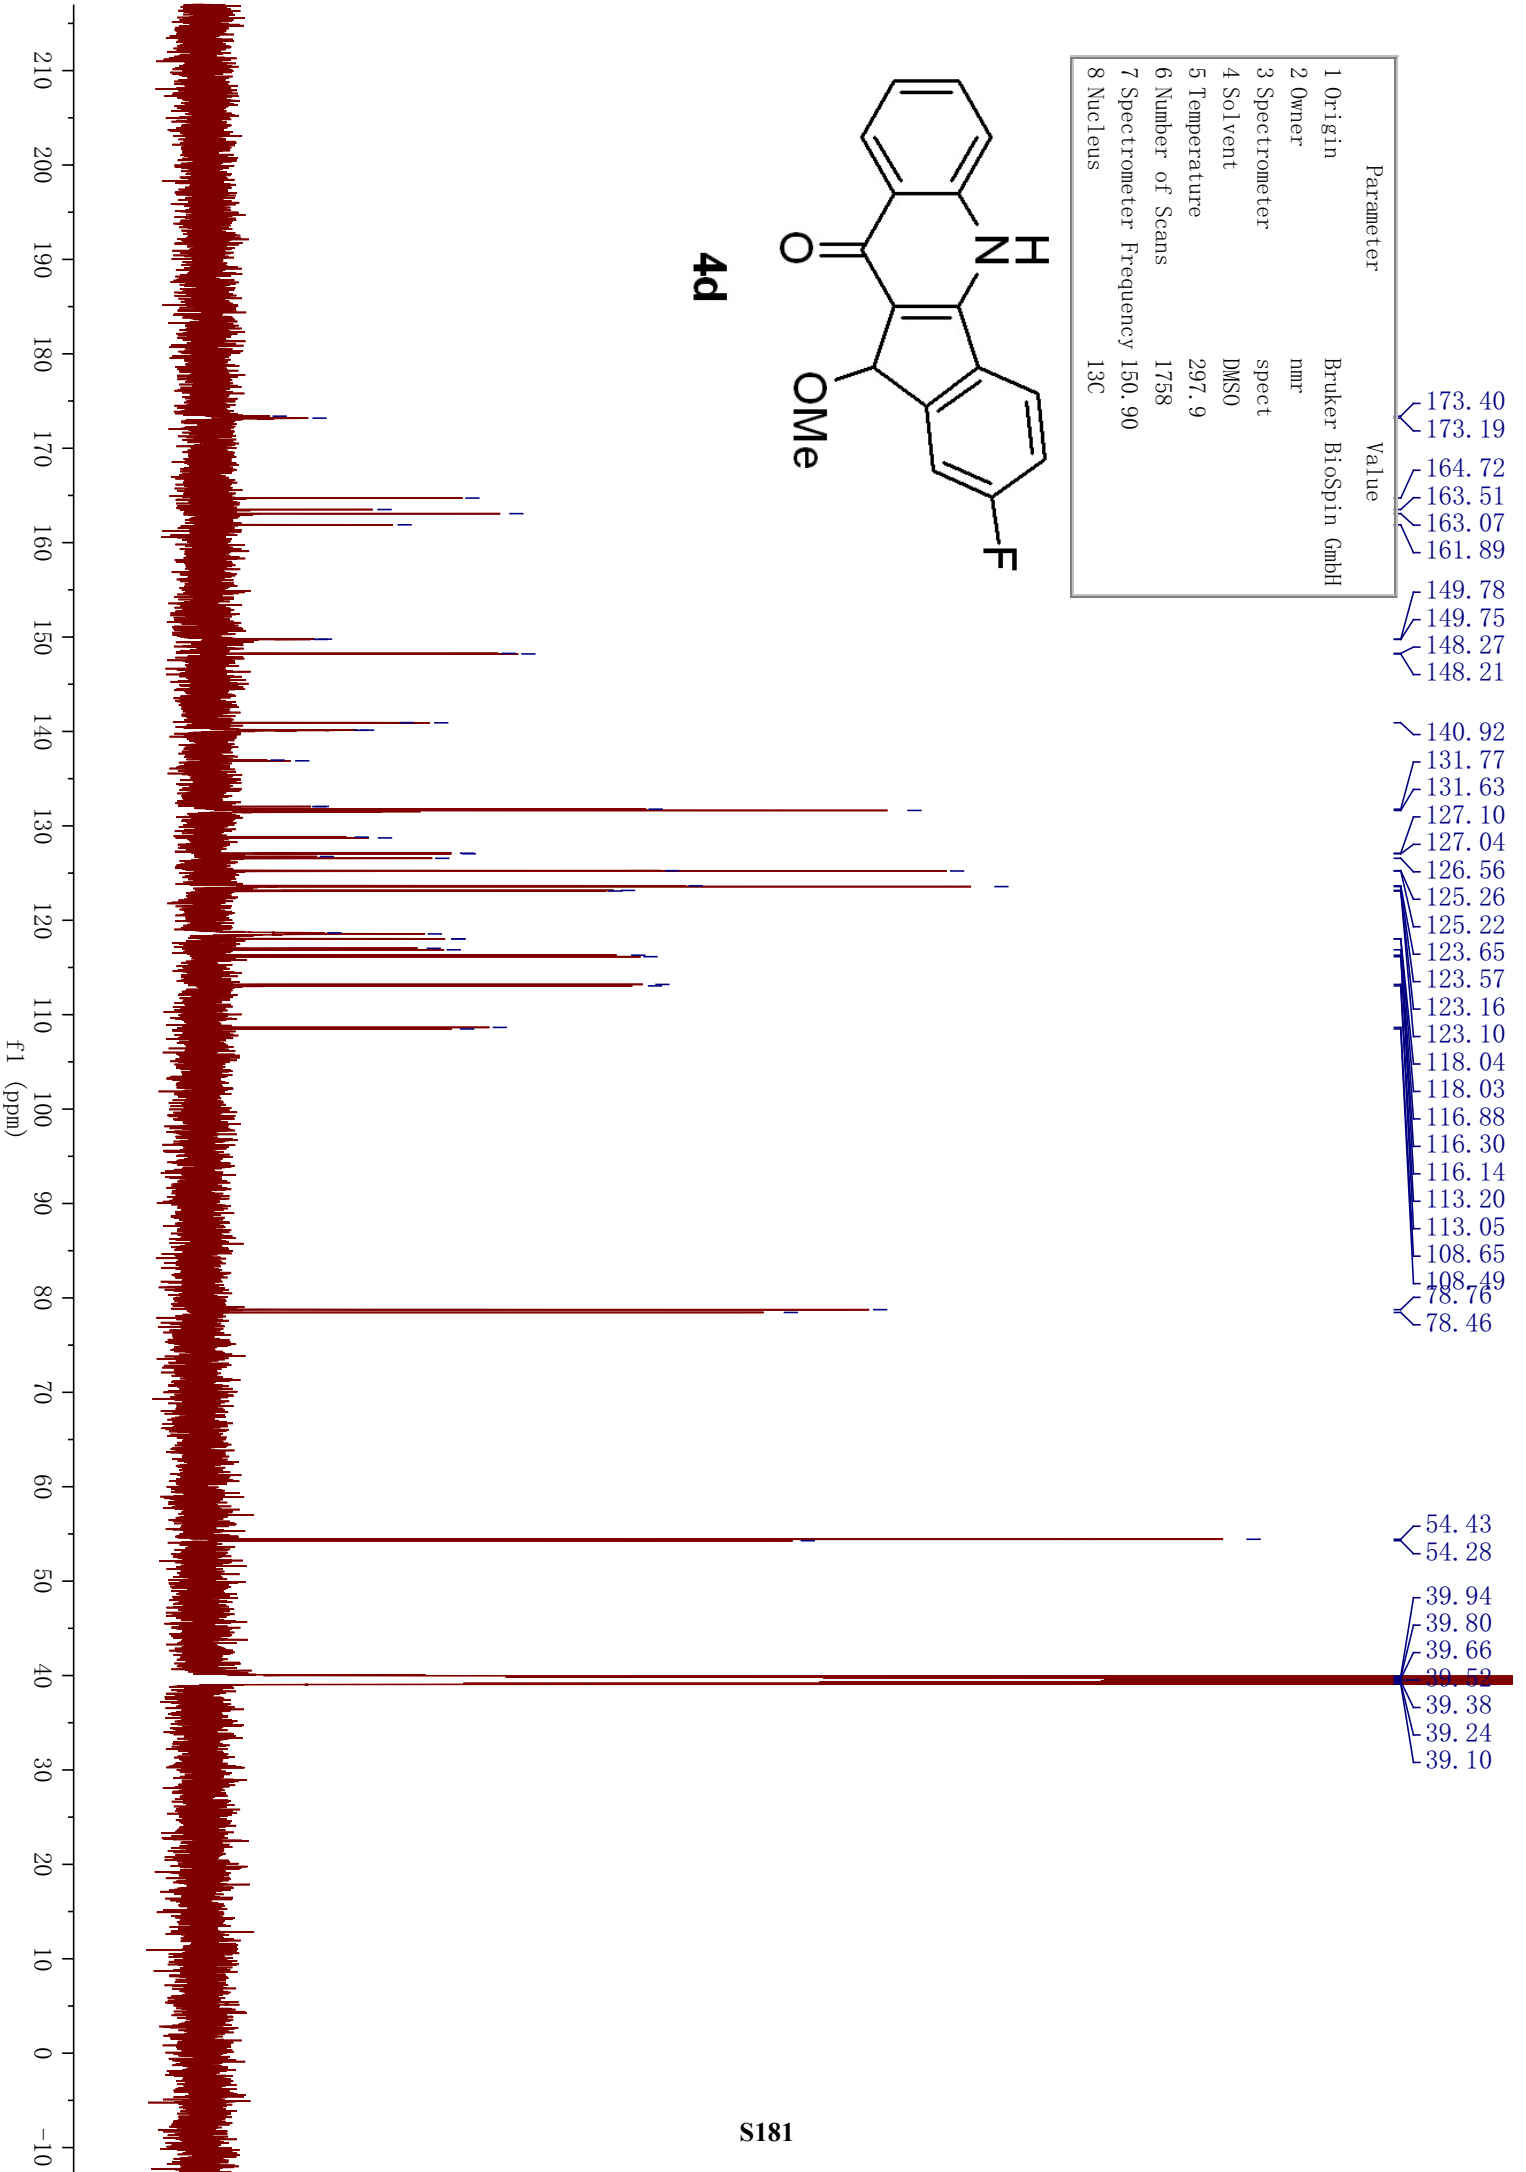

12.50  
12.46

8.19  
8.18  
8.04  
8.03  
7.72  
7.71  
7.71  
7.70  
7.69  
7.69  
7.67  
7.66  
7.66  
7.65  
7.64  
7.40  
7.39  
7.39  
7.38  
7.38  
7.38  
7.37  
7.37  
7.37  
7.37  
5.55  
5.54

| Parameter                | Value               |
|--------------------------|---------------------|
| 1 Origin                 | Bruker BioSpin GmbH |
| 2 Owner                  | nmr                 |
| 3 Spectrometer           | spect               |
| 4 Solvent                | DMSO                |
| 5 Temperature            | 297.9               |
| 6 Number of Scans        | 16                  |
| 7 Spectrometer Frequency | 600.13              |
| 8 Nucleus                | <sup>1</sup> H      |

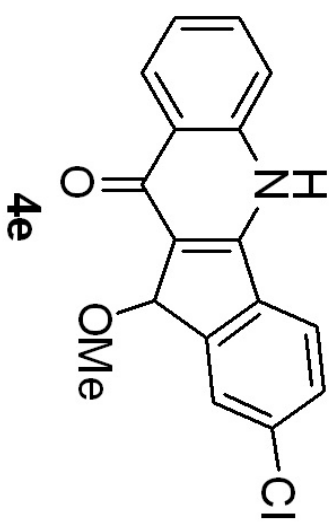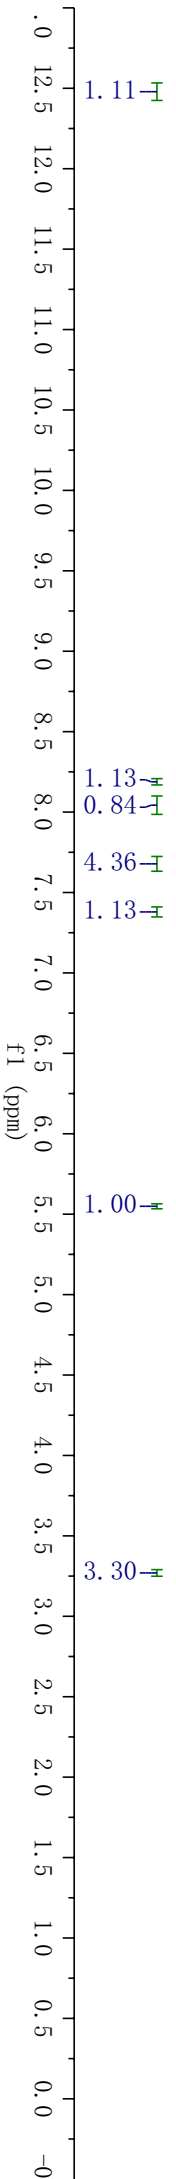

3.28  
3.26  
2.51  
2.50  
2.50  
2.49

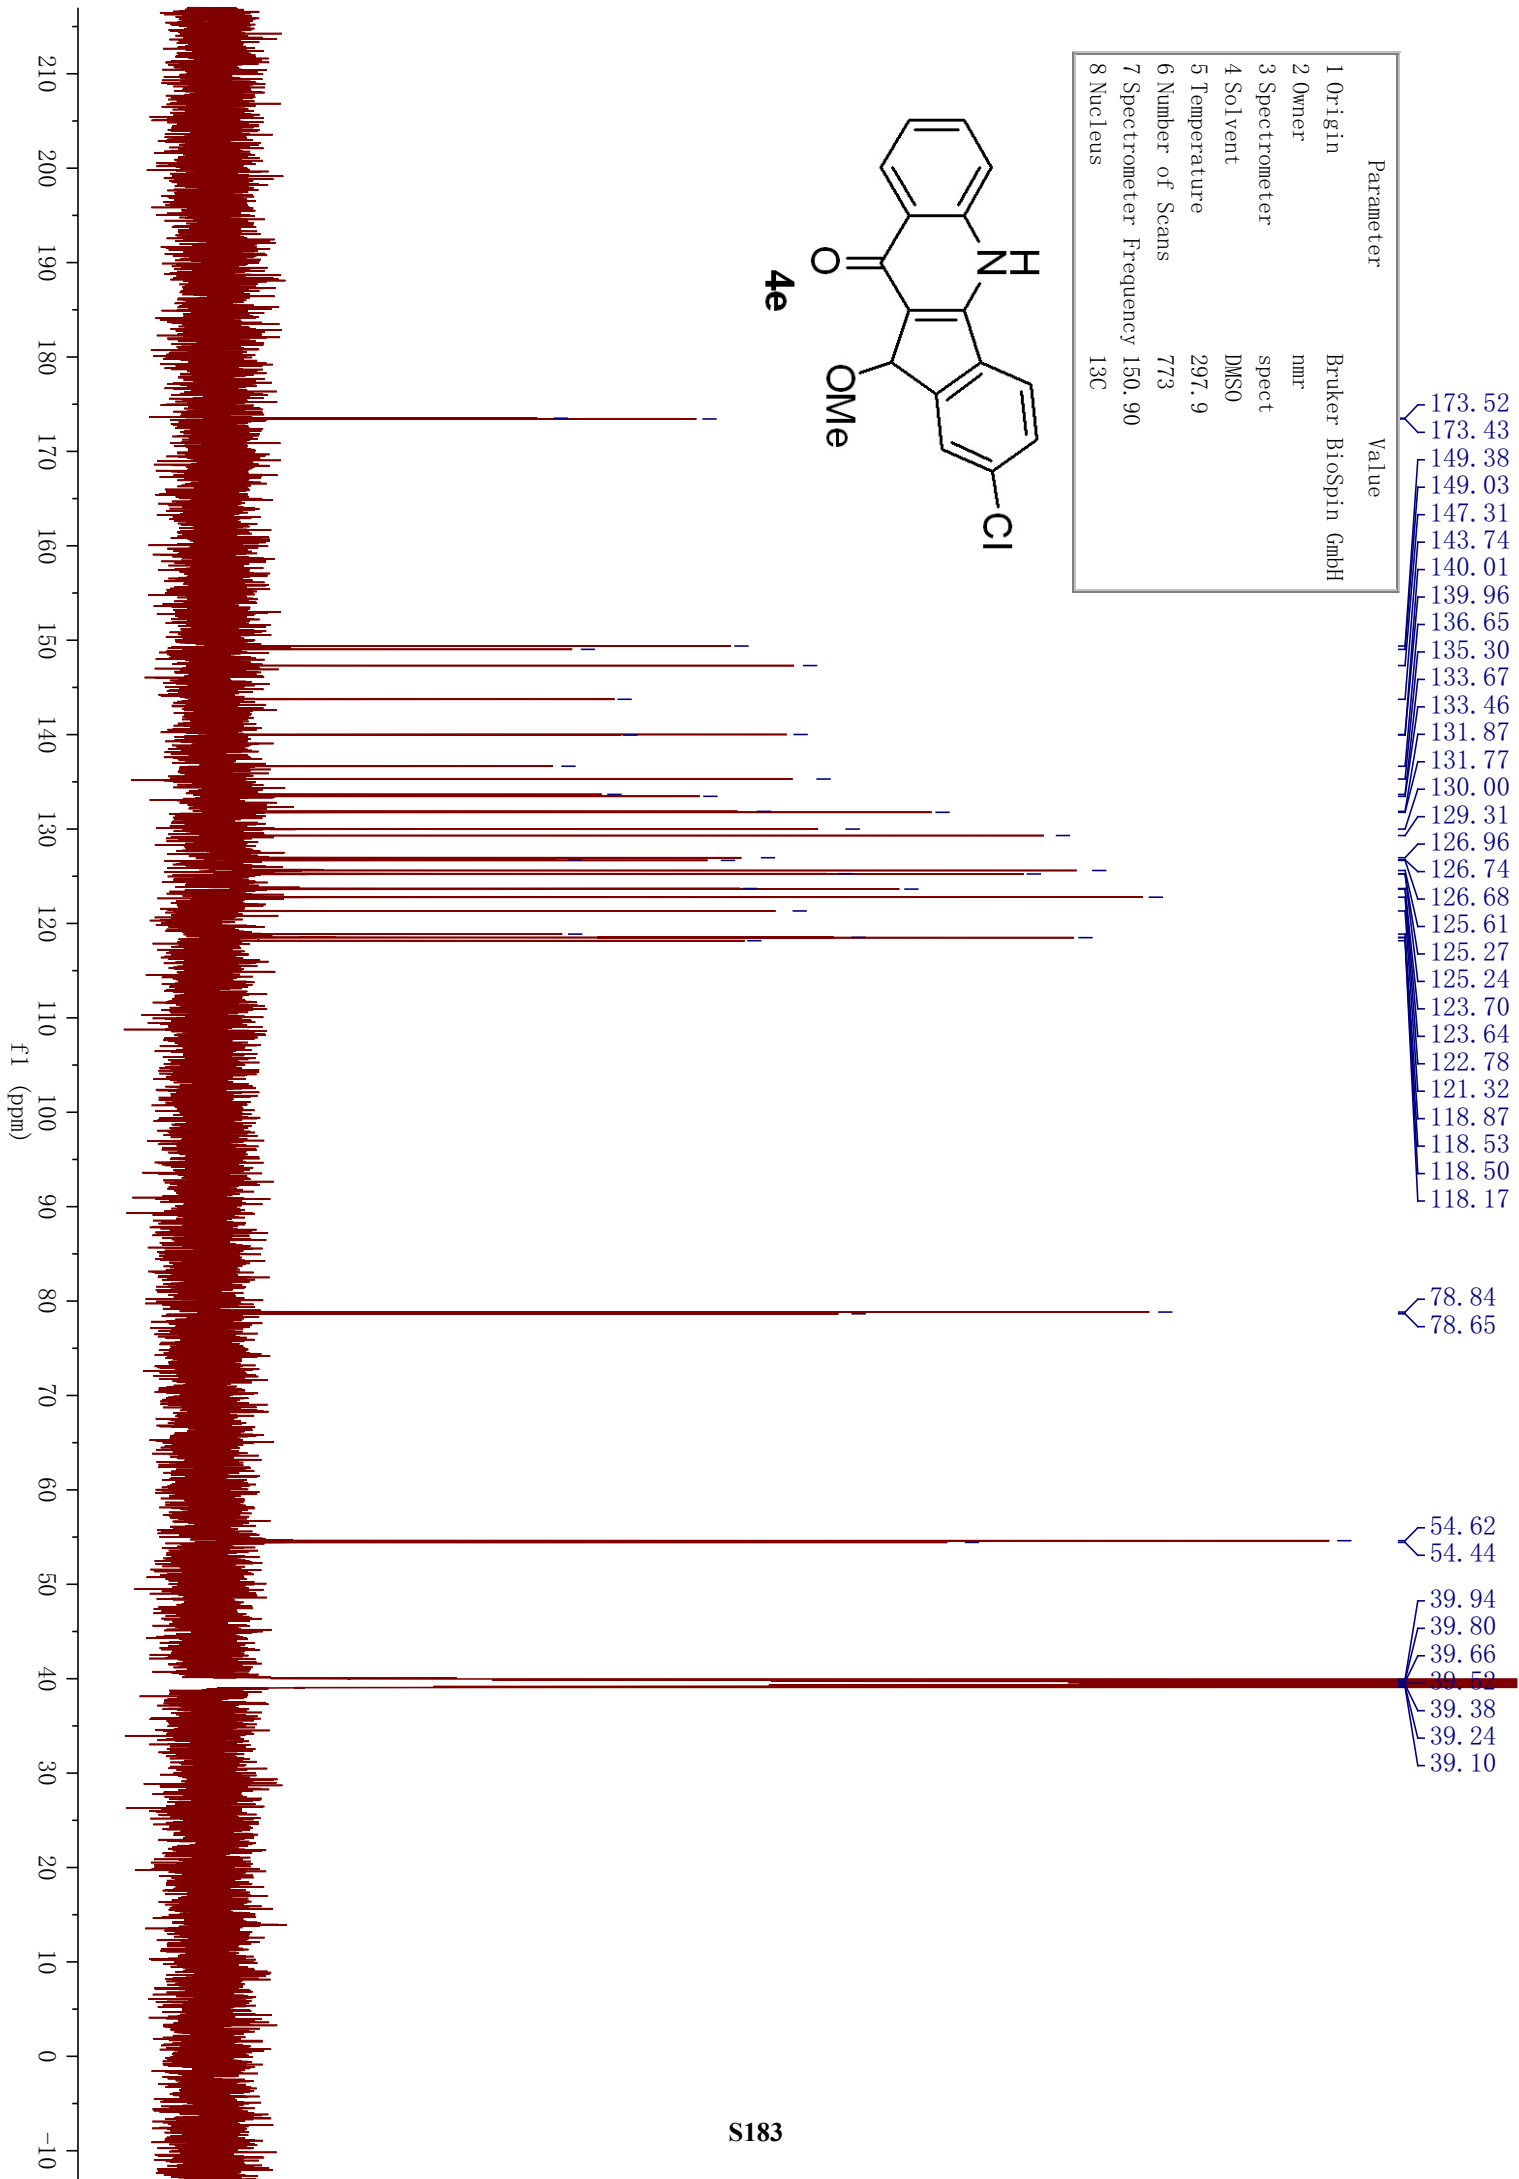

| Parameter                | Value               |
|--------------------------|---------------------|
| 1 Origin                 | Bruker Biospin GmbH |
| 2 Owner                  | nmr                 |
| 3 Spectrometer           | spect               |
| 4 Solvent                | DMSO                |
| 5 Temperature            | 297.9               |
| 6 Number of Scans        | 16                  |
| 7 Spectrometer Frequency | 600.13              |
| 8 Nucleus                | <sup>1</sup> H      |

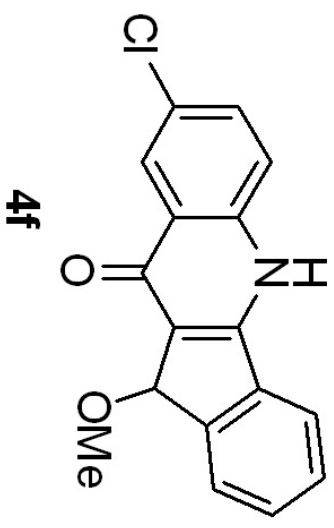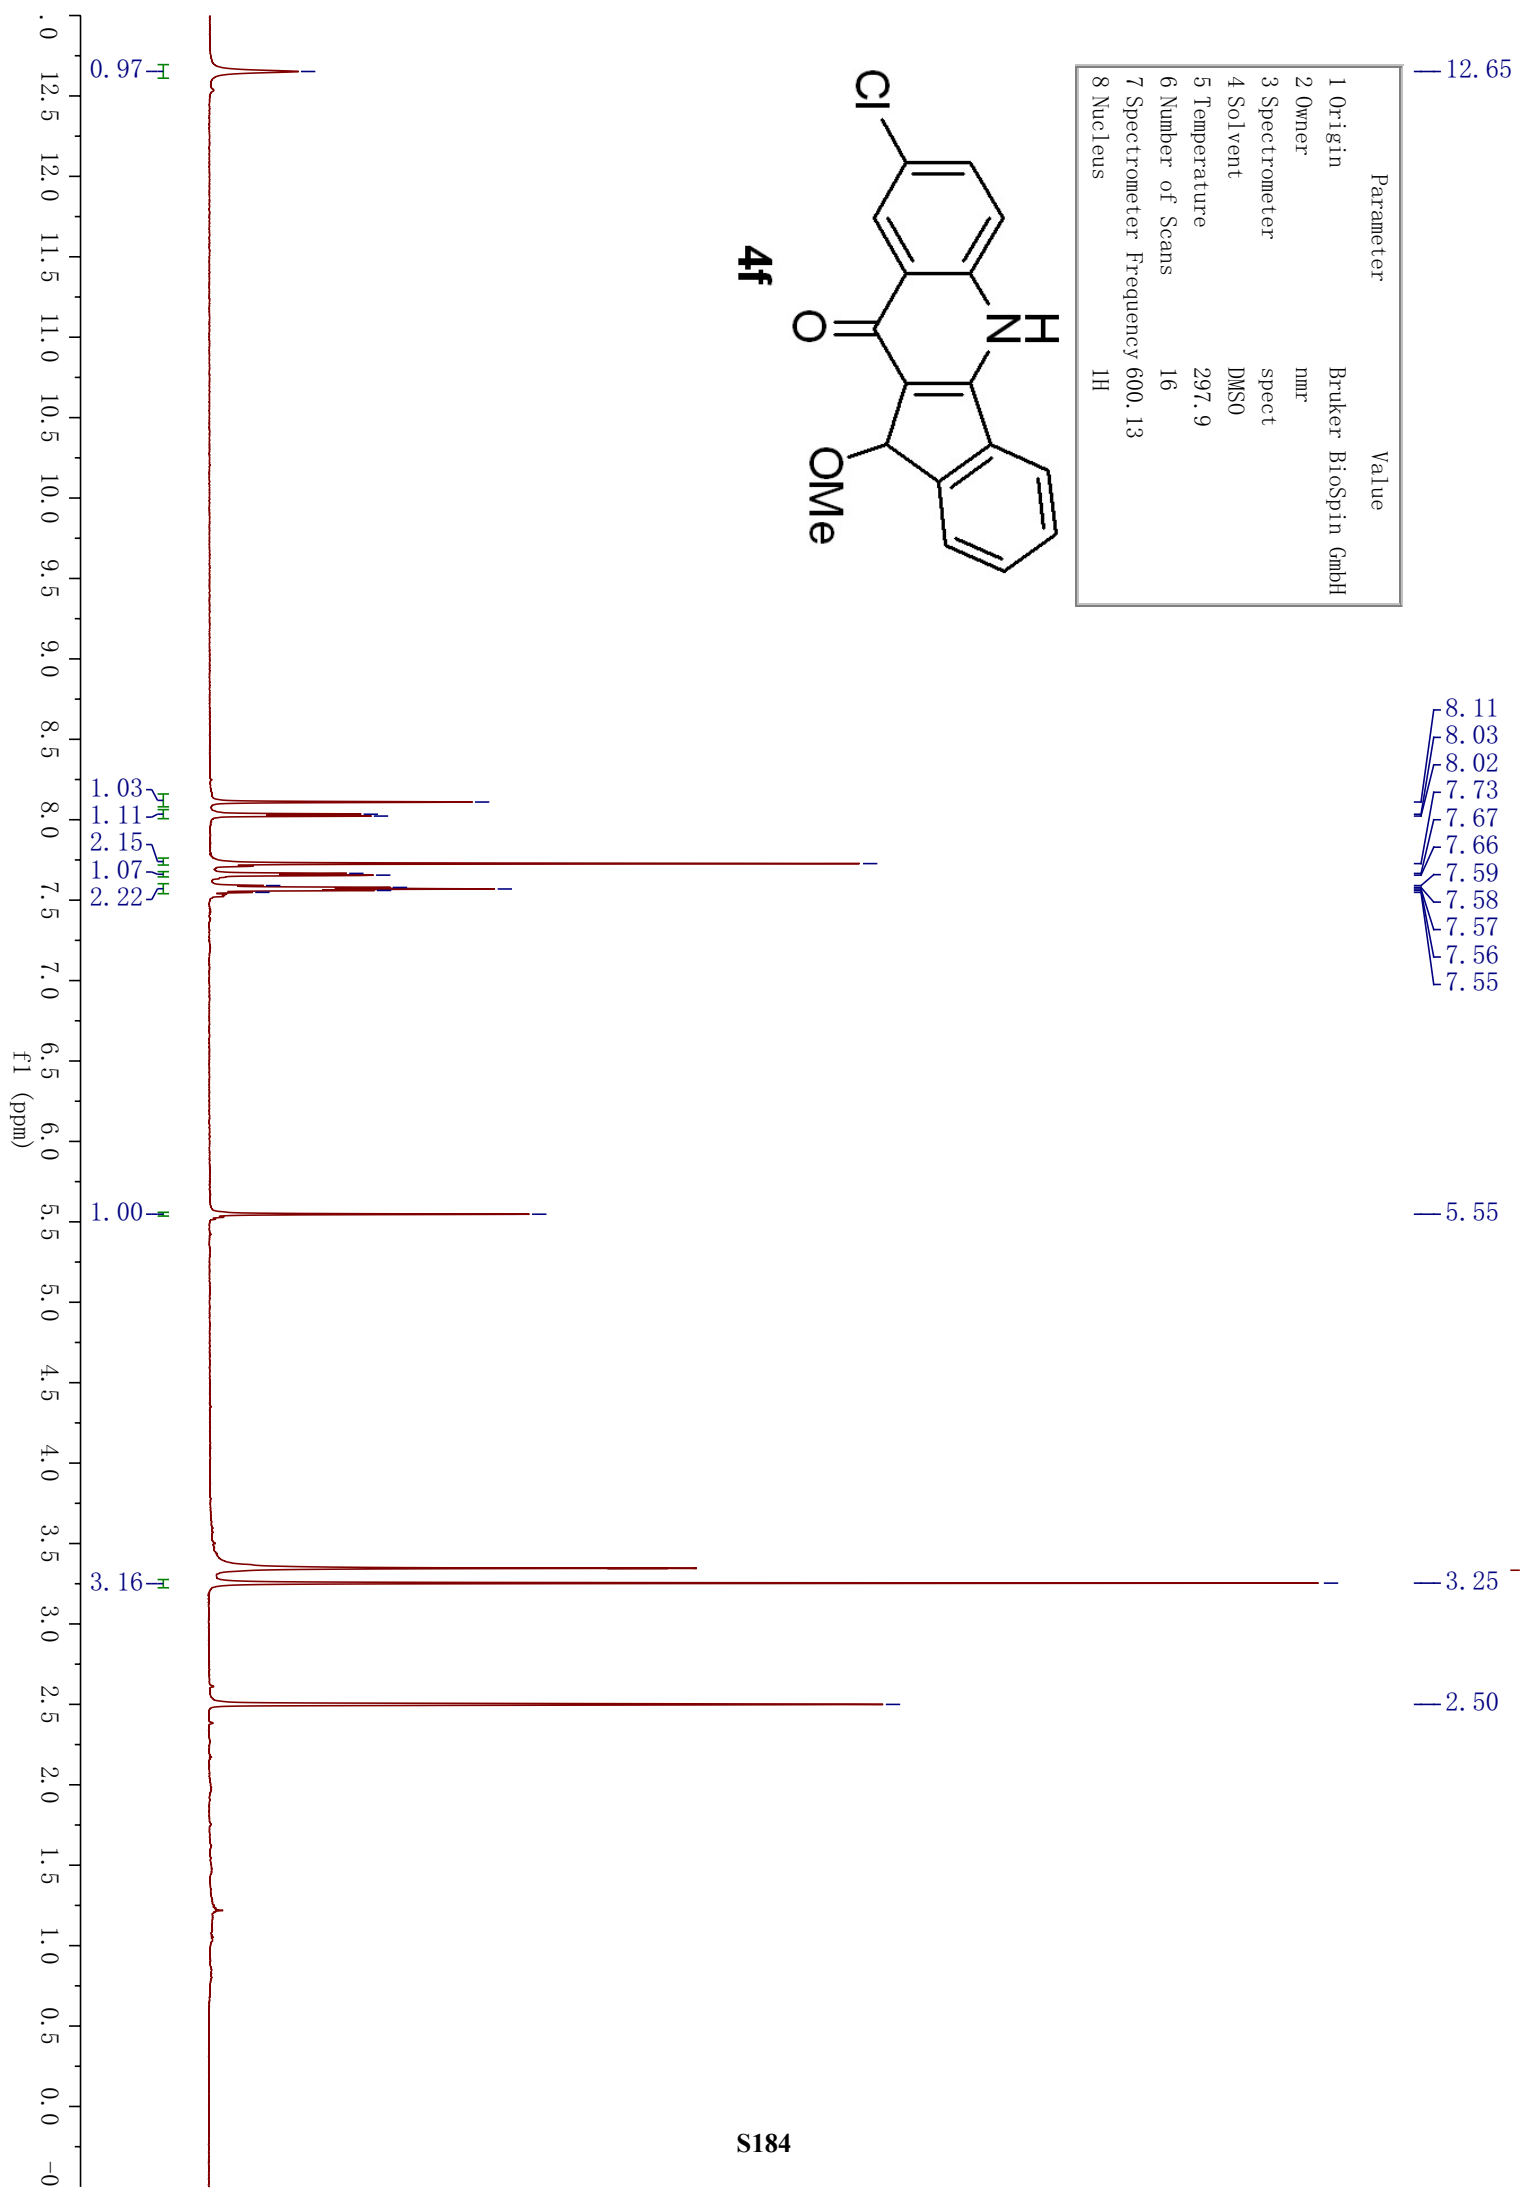

| Parameter                | Value                |
|--------------------------|----------------------|
| 1 Origin                 | Brucker BioSpin GmbH |
| 2 Owner                  | nmr                  |
| 3 Spectrometer           | spect                |
| 4 Solvent                | DMSO                 |
| 5 Temperature            | 298.0                |
| 6 Number of Scans        | 2958                 |
| 7 Spectrometer Frequency | 150.90               |
| 8 Nucleus                | <sup>13</sup> C      |

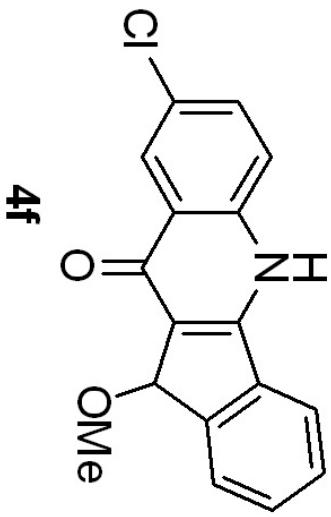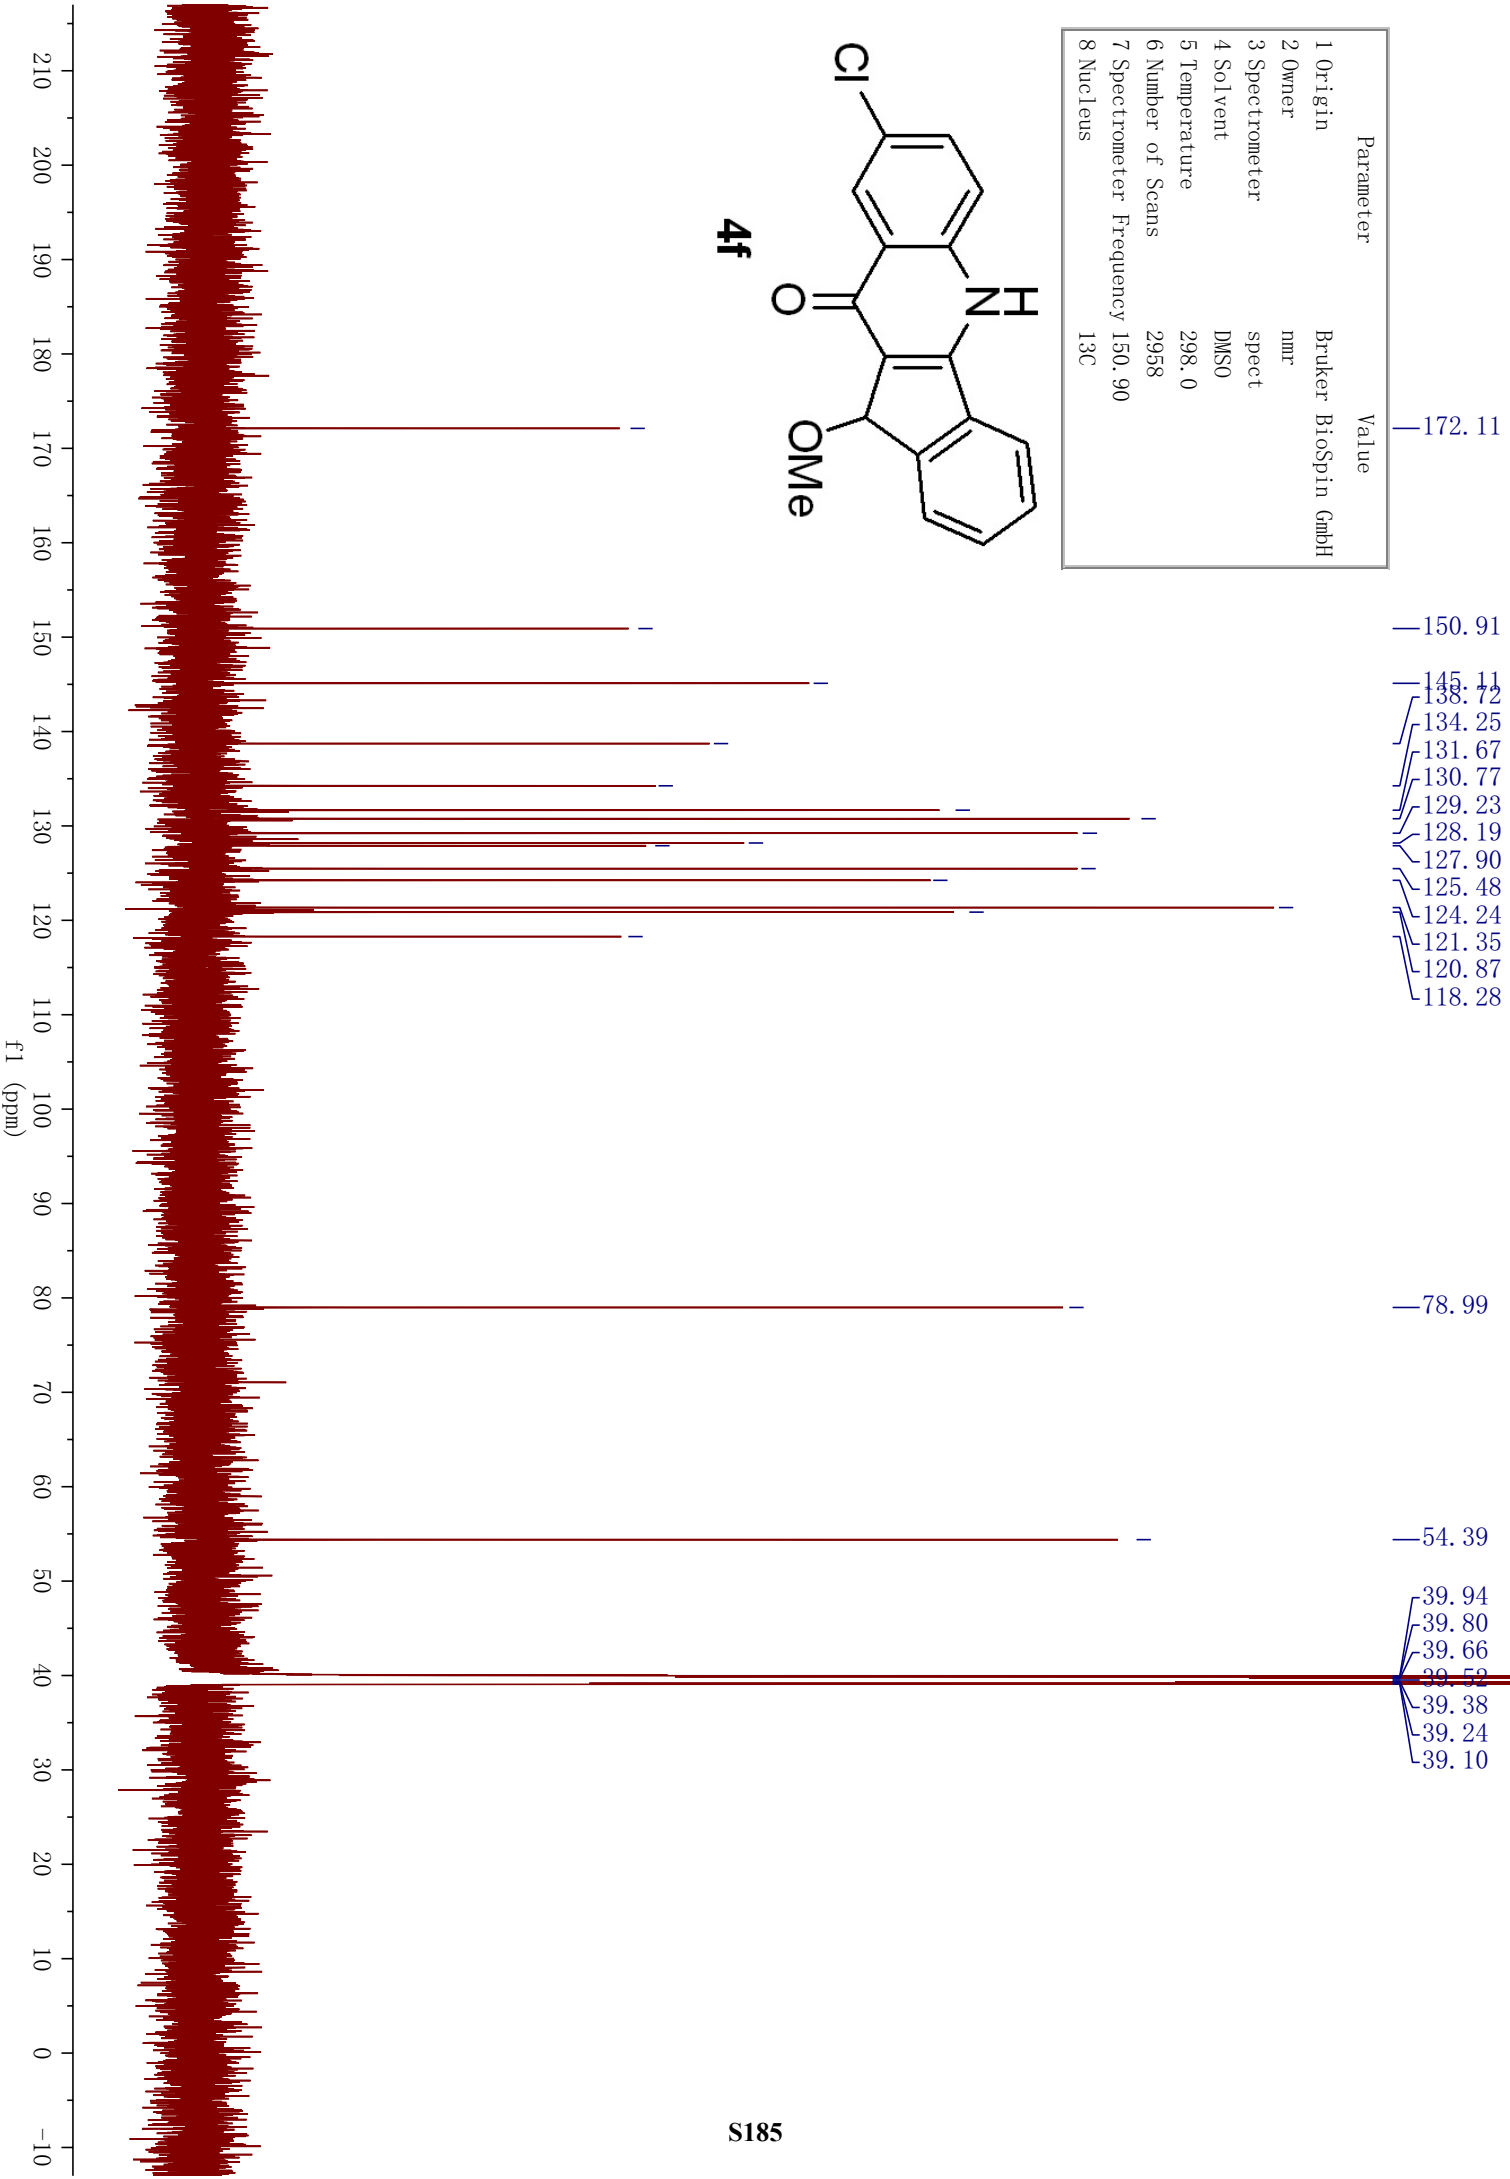

12.56  
12.52

| Parameter                | Value               |
|--------------------------|---------------------|
| 1 Origin                 | Bruker Biospin GmbH |
| 2 Owner                  | av600               |
| 3 Spectrometer           | spect               |
| 4 Solvent                | DMSO                |
| 5 Temperature            | 297.0               |
| 6 Number of Scans        | 8                   |
| 7 Spectrometer Frequency | 600.13              |
| 8 Nucleus                | <sup>1</sup> H      |

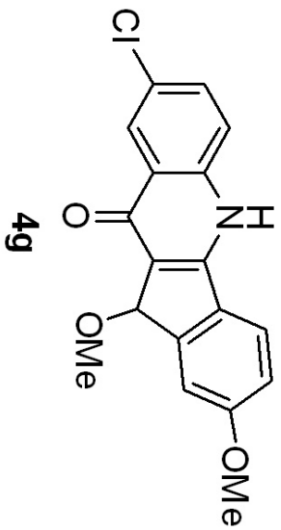

8.08  
8.07

7.68  
7.67  
7.66  
7.12  
7.10  
7.08  
7.07

5.47  
5.46

3.86

3.22  
3.20

2.50

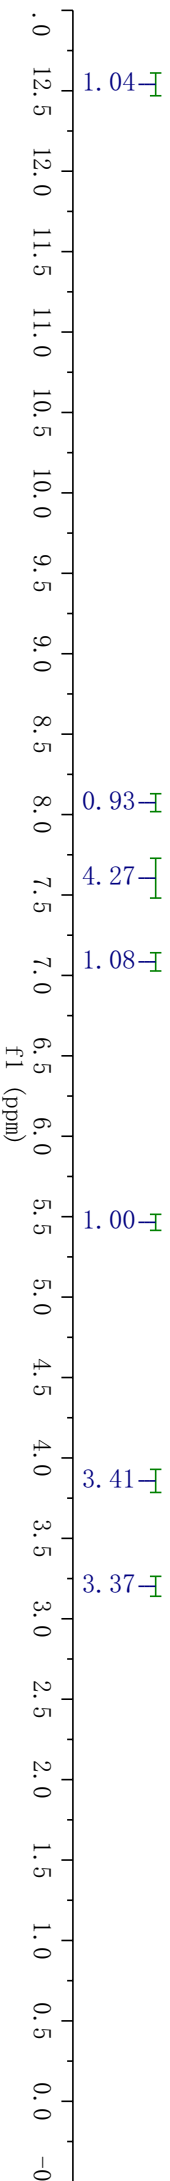

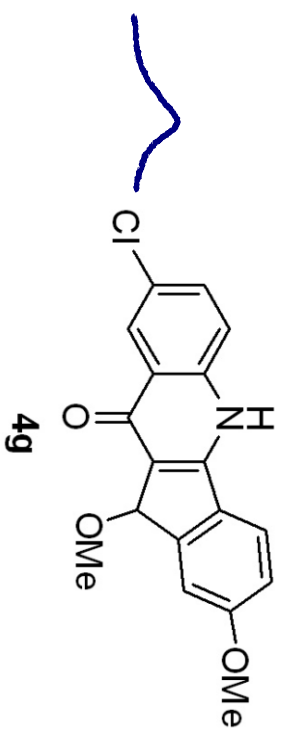

T=90 °C

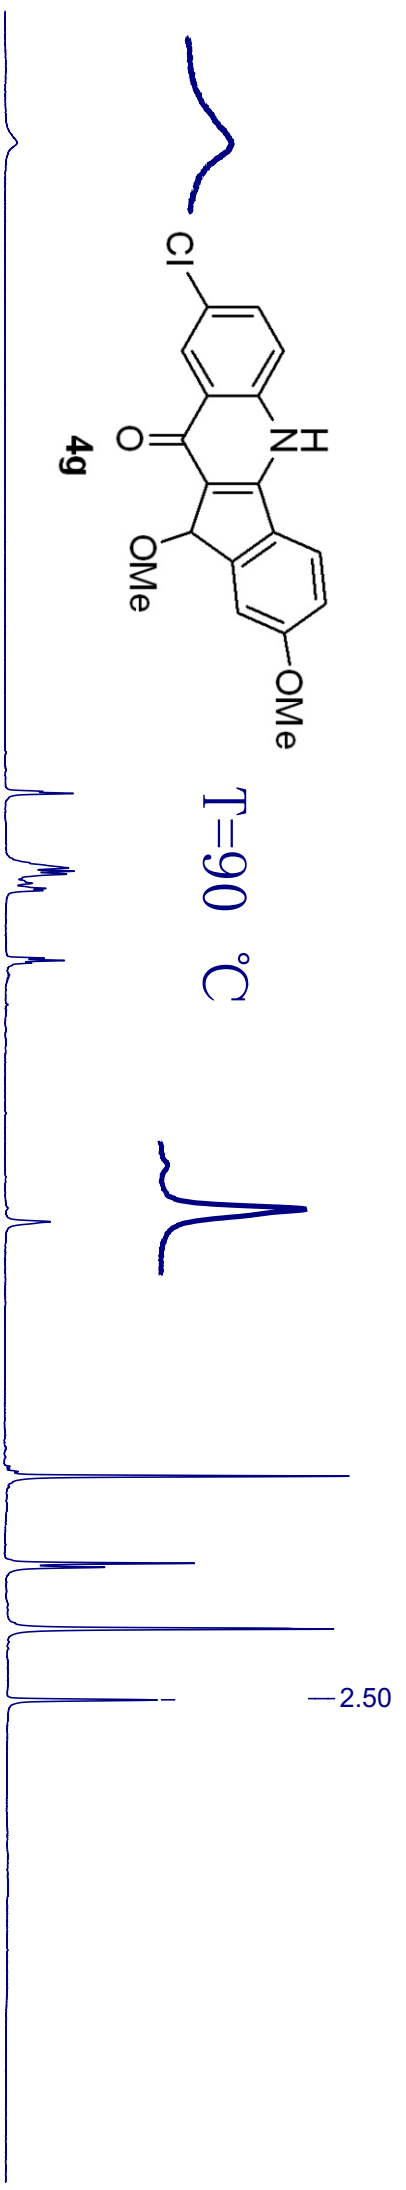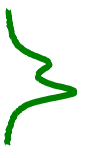

T=60 °C

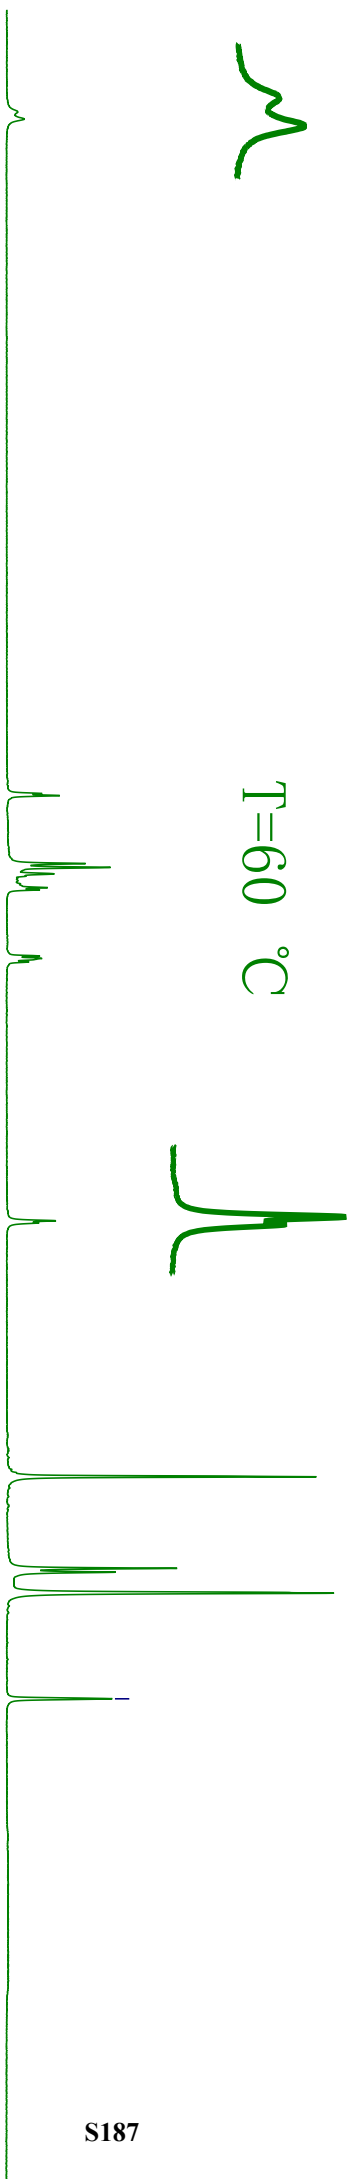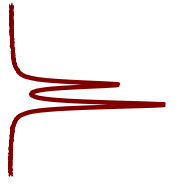

T=25 °C

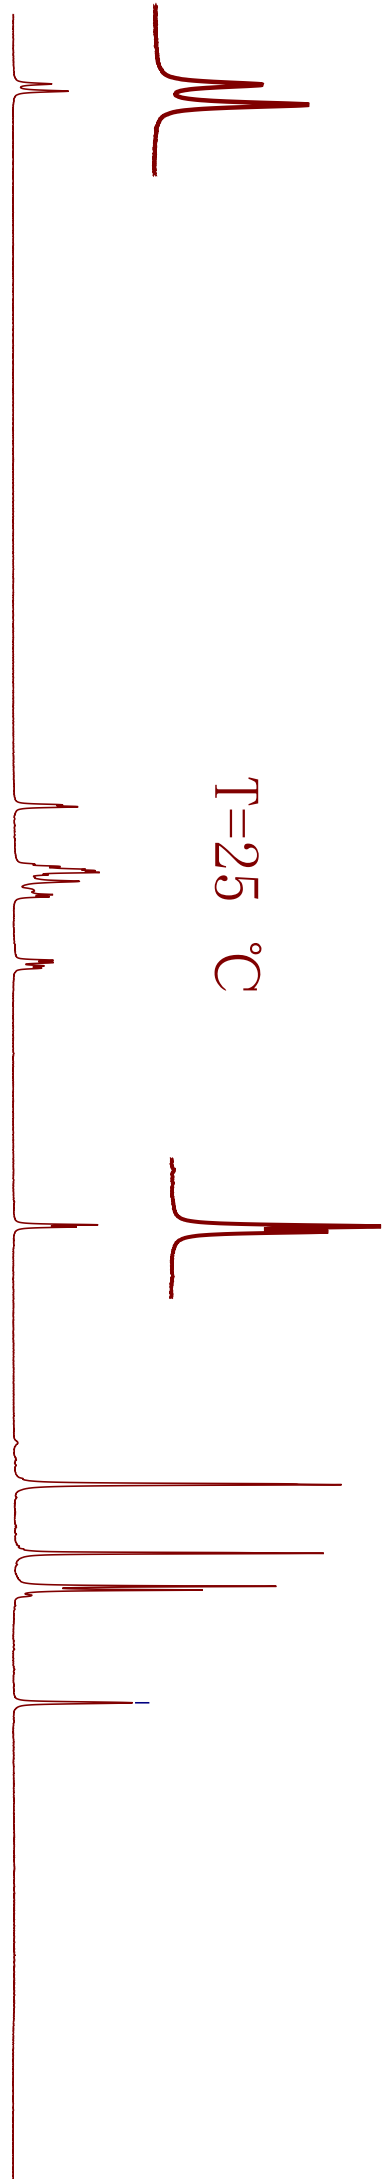

f1 (ppm)



| Parameter                | Value                |
|--------------------------|----------------------|
| 1 Origin                 | Brucker Biospin GmbH |
| 2 Owner                  | nmr                  |
| 3 Spectrometer           | spect                |
| 4 Solvent                | DMSO                 |
| 5 Temperature            | 297.9                |
| 6 Number of Scans        | 698                  |
| 7 Spectrometer Frequency | 150.90               |
| 8 Nucleus                | <sup>13</sup> C      |

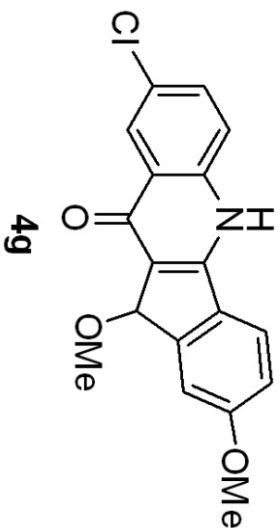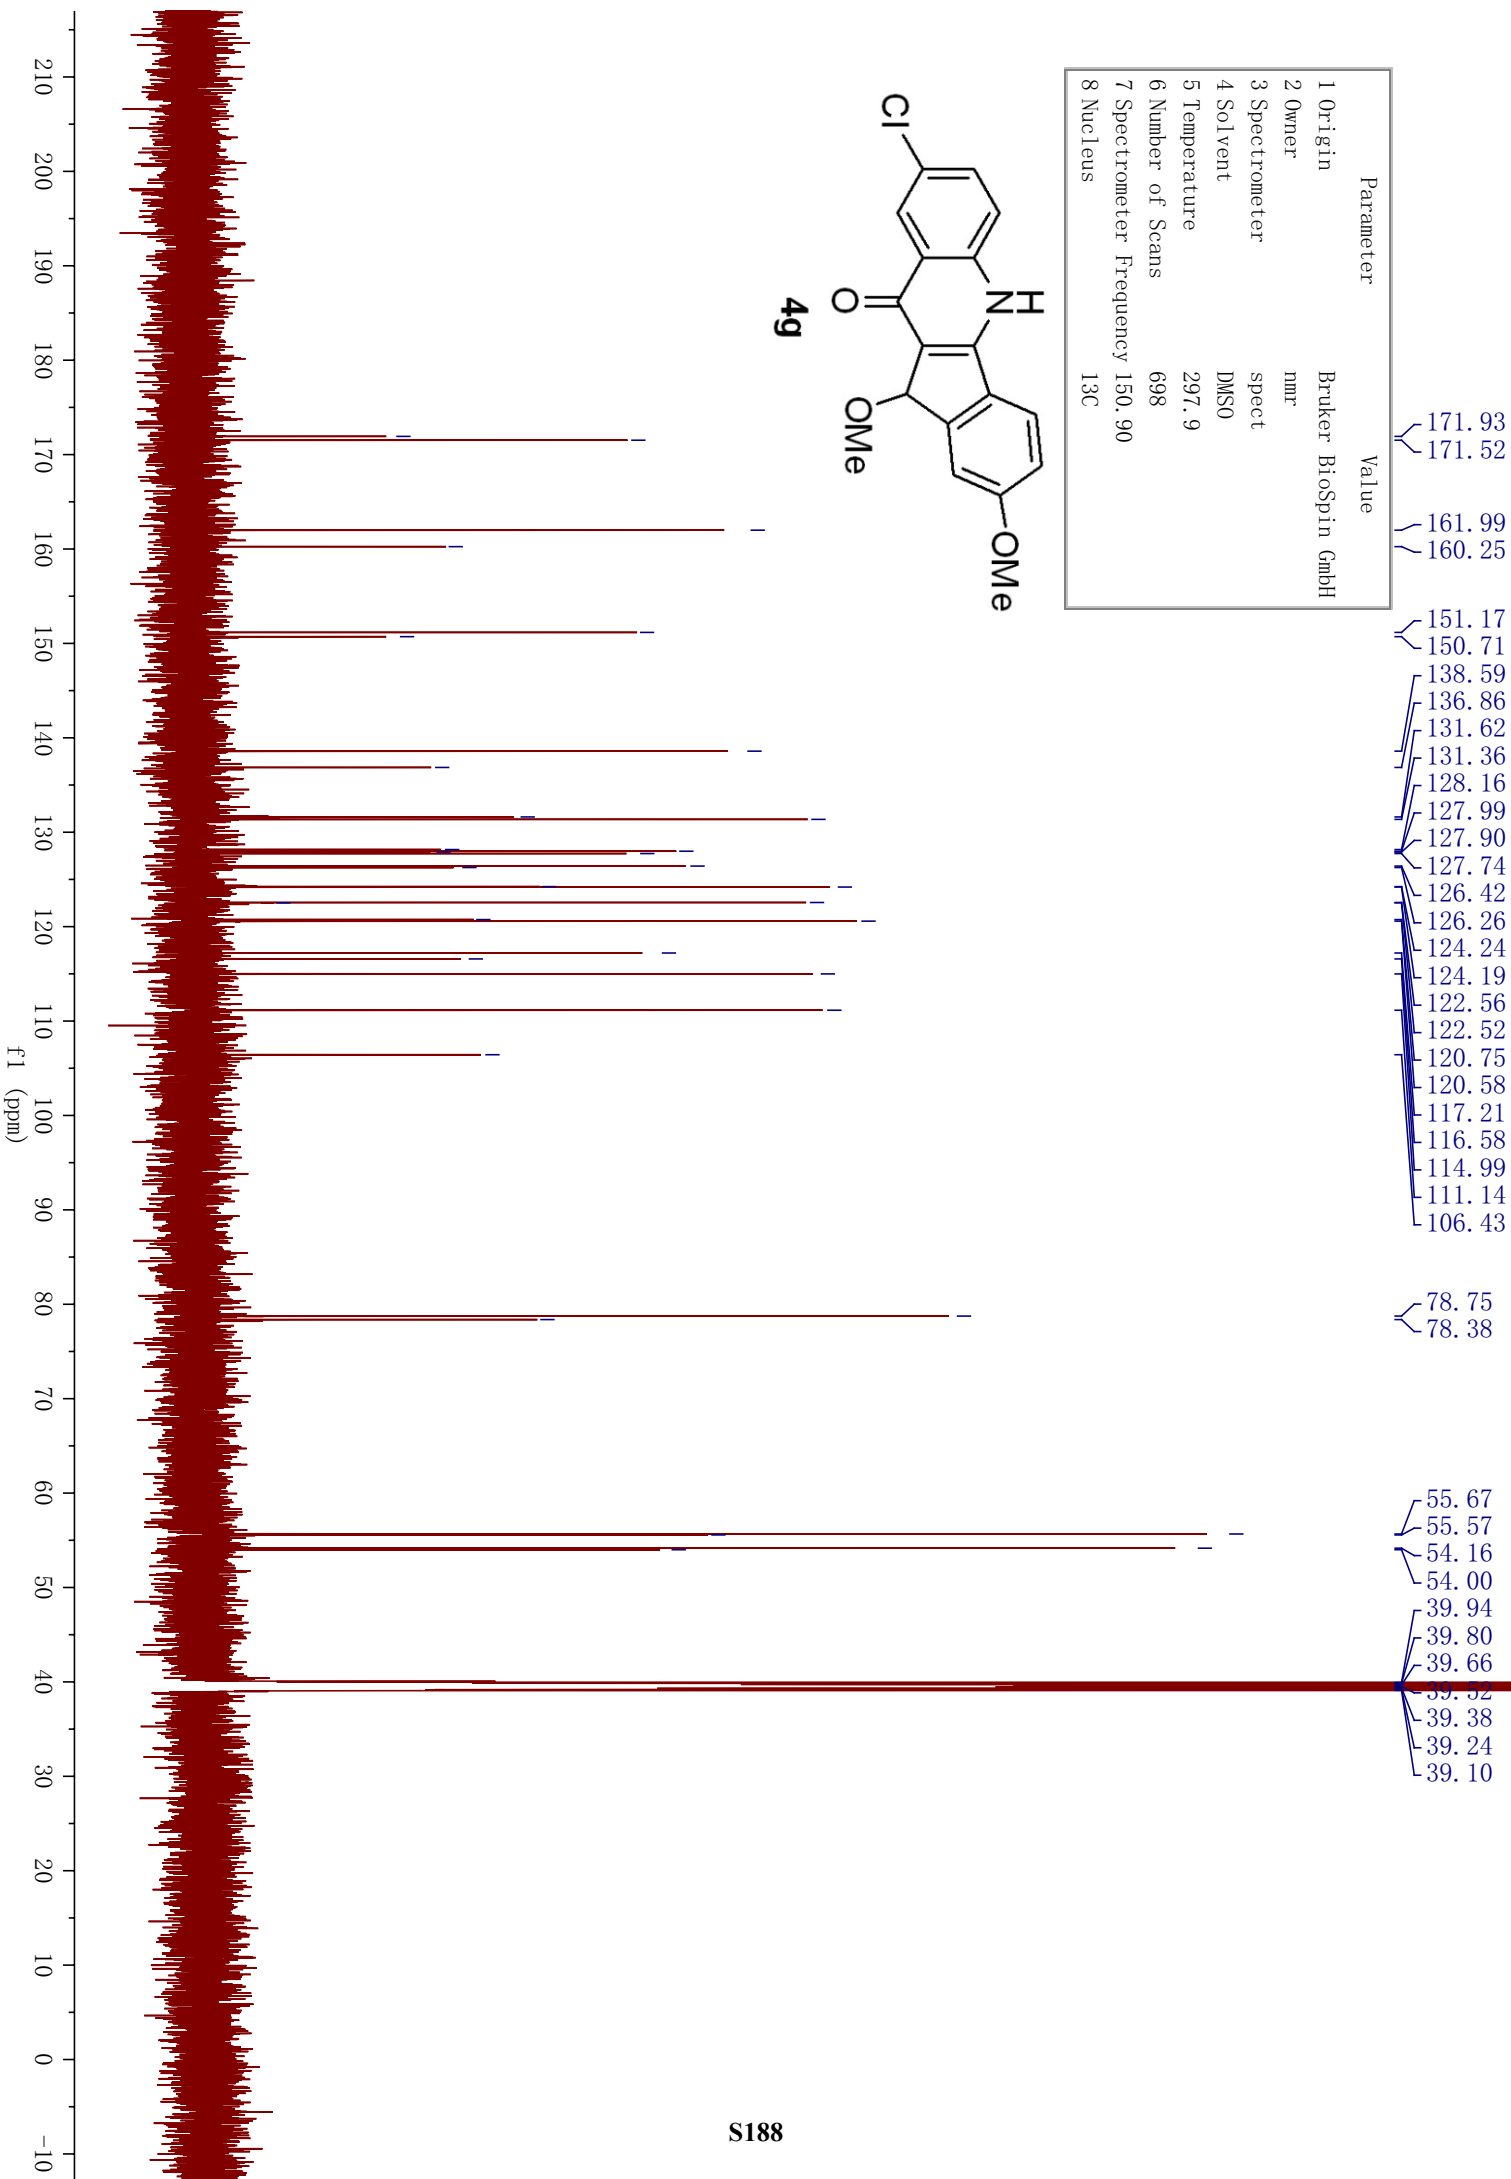

| Parameter                | Value                |
|--------------------------|----------------------|
| 1 Origin                 | Brucker BioSpin GmbH |
| 2 Owner                  | nmr                  |
| 3 Spectrometer           | spect                |
| 4 Solvent                | DMSO                 |
| 5 Temperature            | 297.9                |
| 6 Number of Scans        | 16                   |
| 7 Spectrometer Frequency | 600.13               |
| 8 Nucleus                | <sup>1</sup> H       |

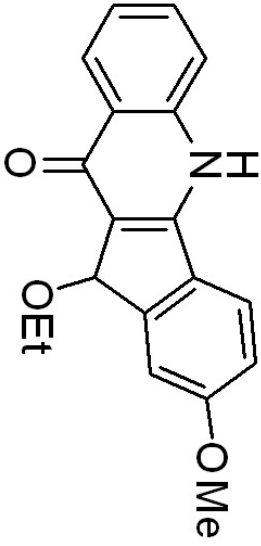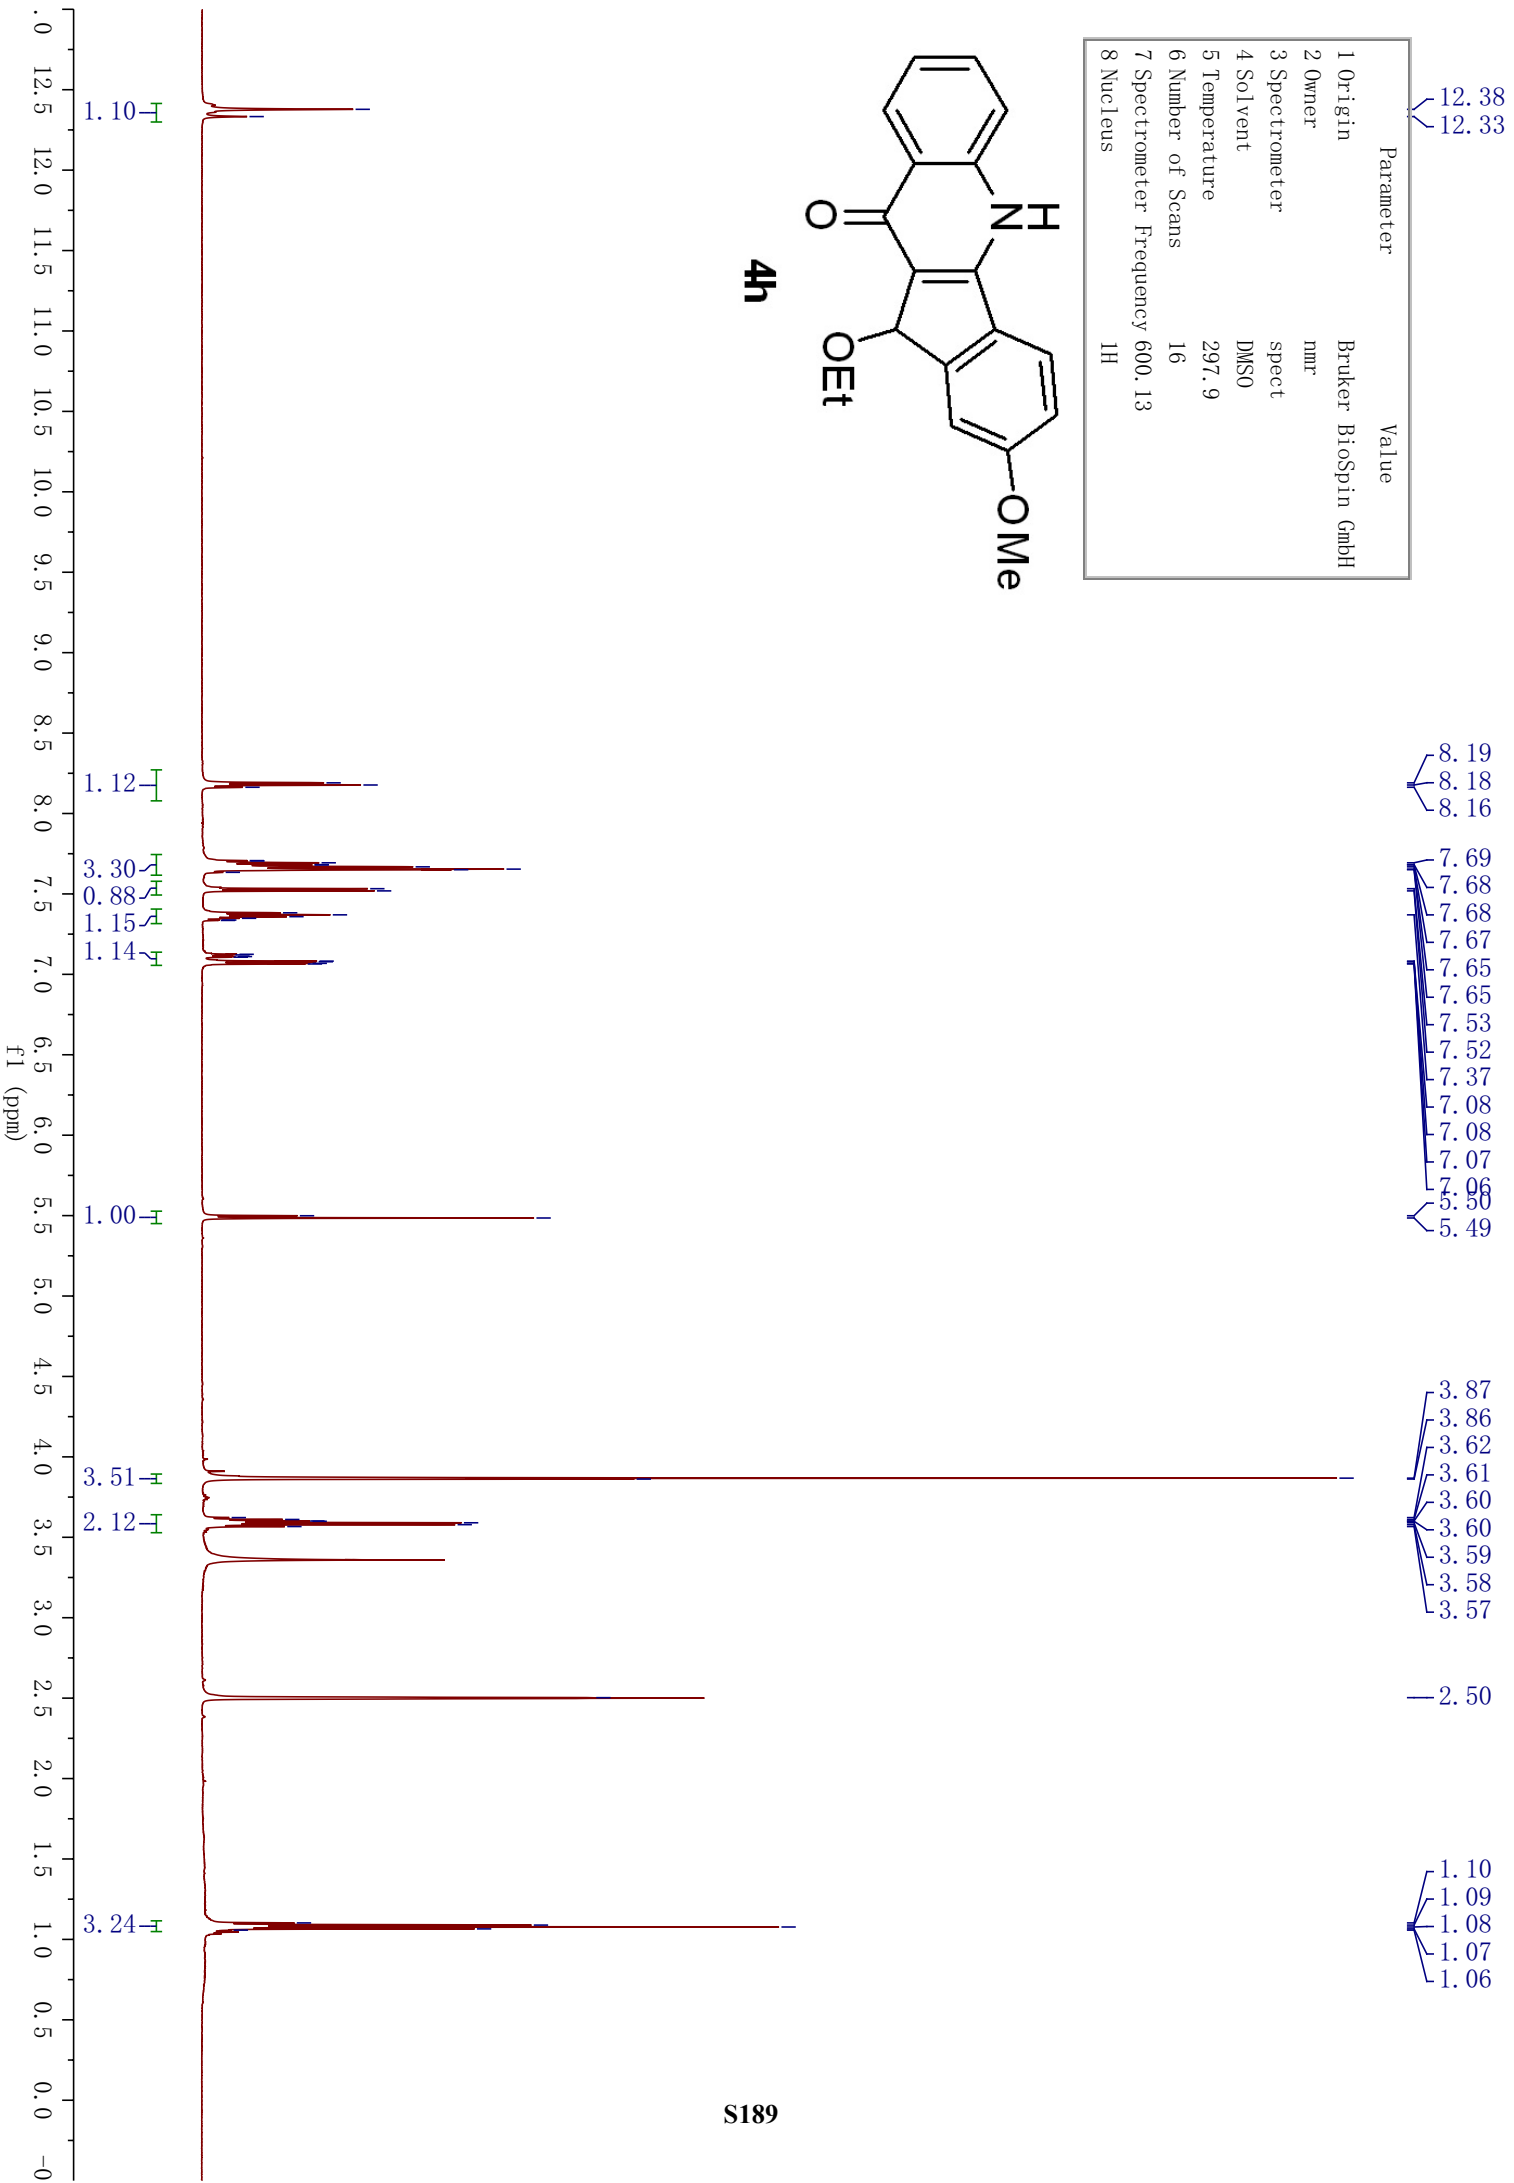

| Parameter                | Value                |
|--------------------------|----------------------|
| 1 Origin                 | Brucker Biospin GmbH |
| 2 Owner                  | nmr                  |
| 3 Spectrometer           | spect                |
| 4 Solvent                | DMSO                 |
| 5 Temperature            | 297.9                |
| 6 Number of Scans        | 496                  |
| 7 Spectrometer Frequency | 150.90               |
| 8 Nucleus                | <sup>13</sup> C      |

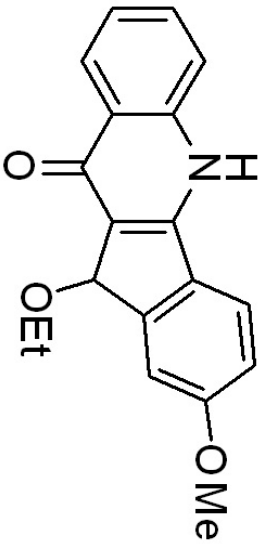

4h

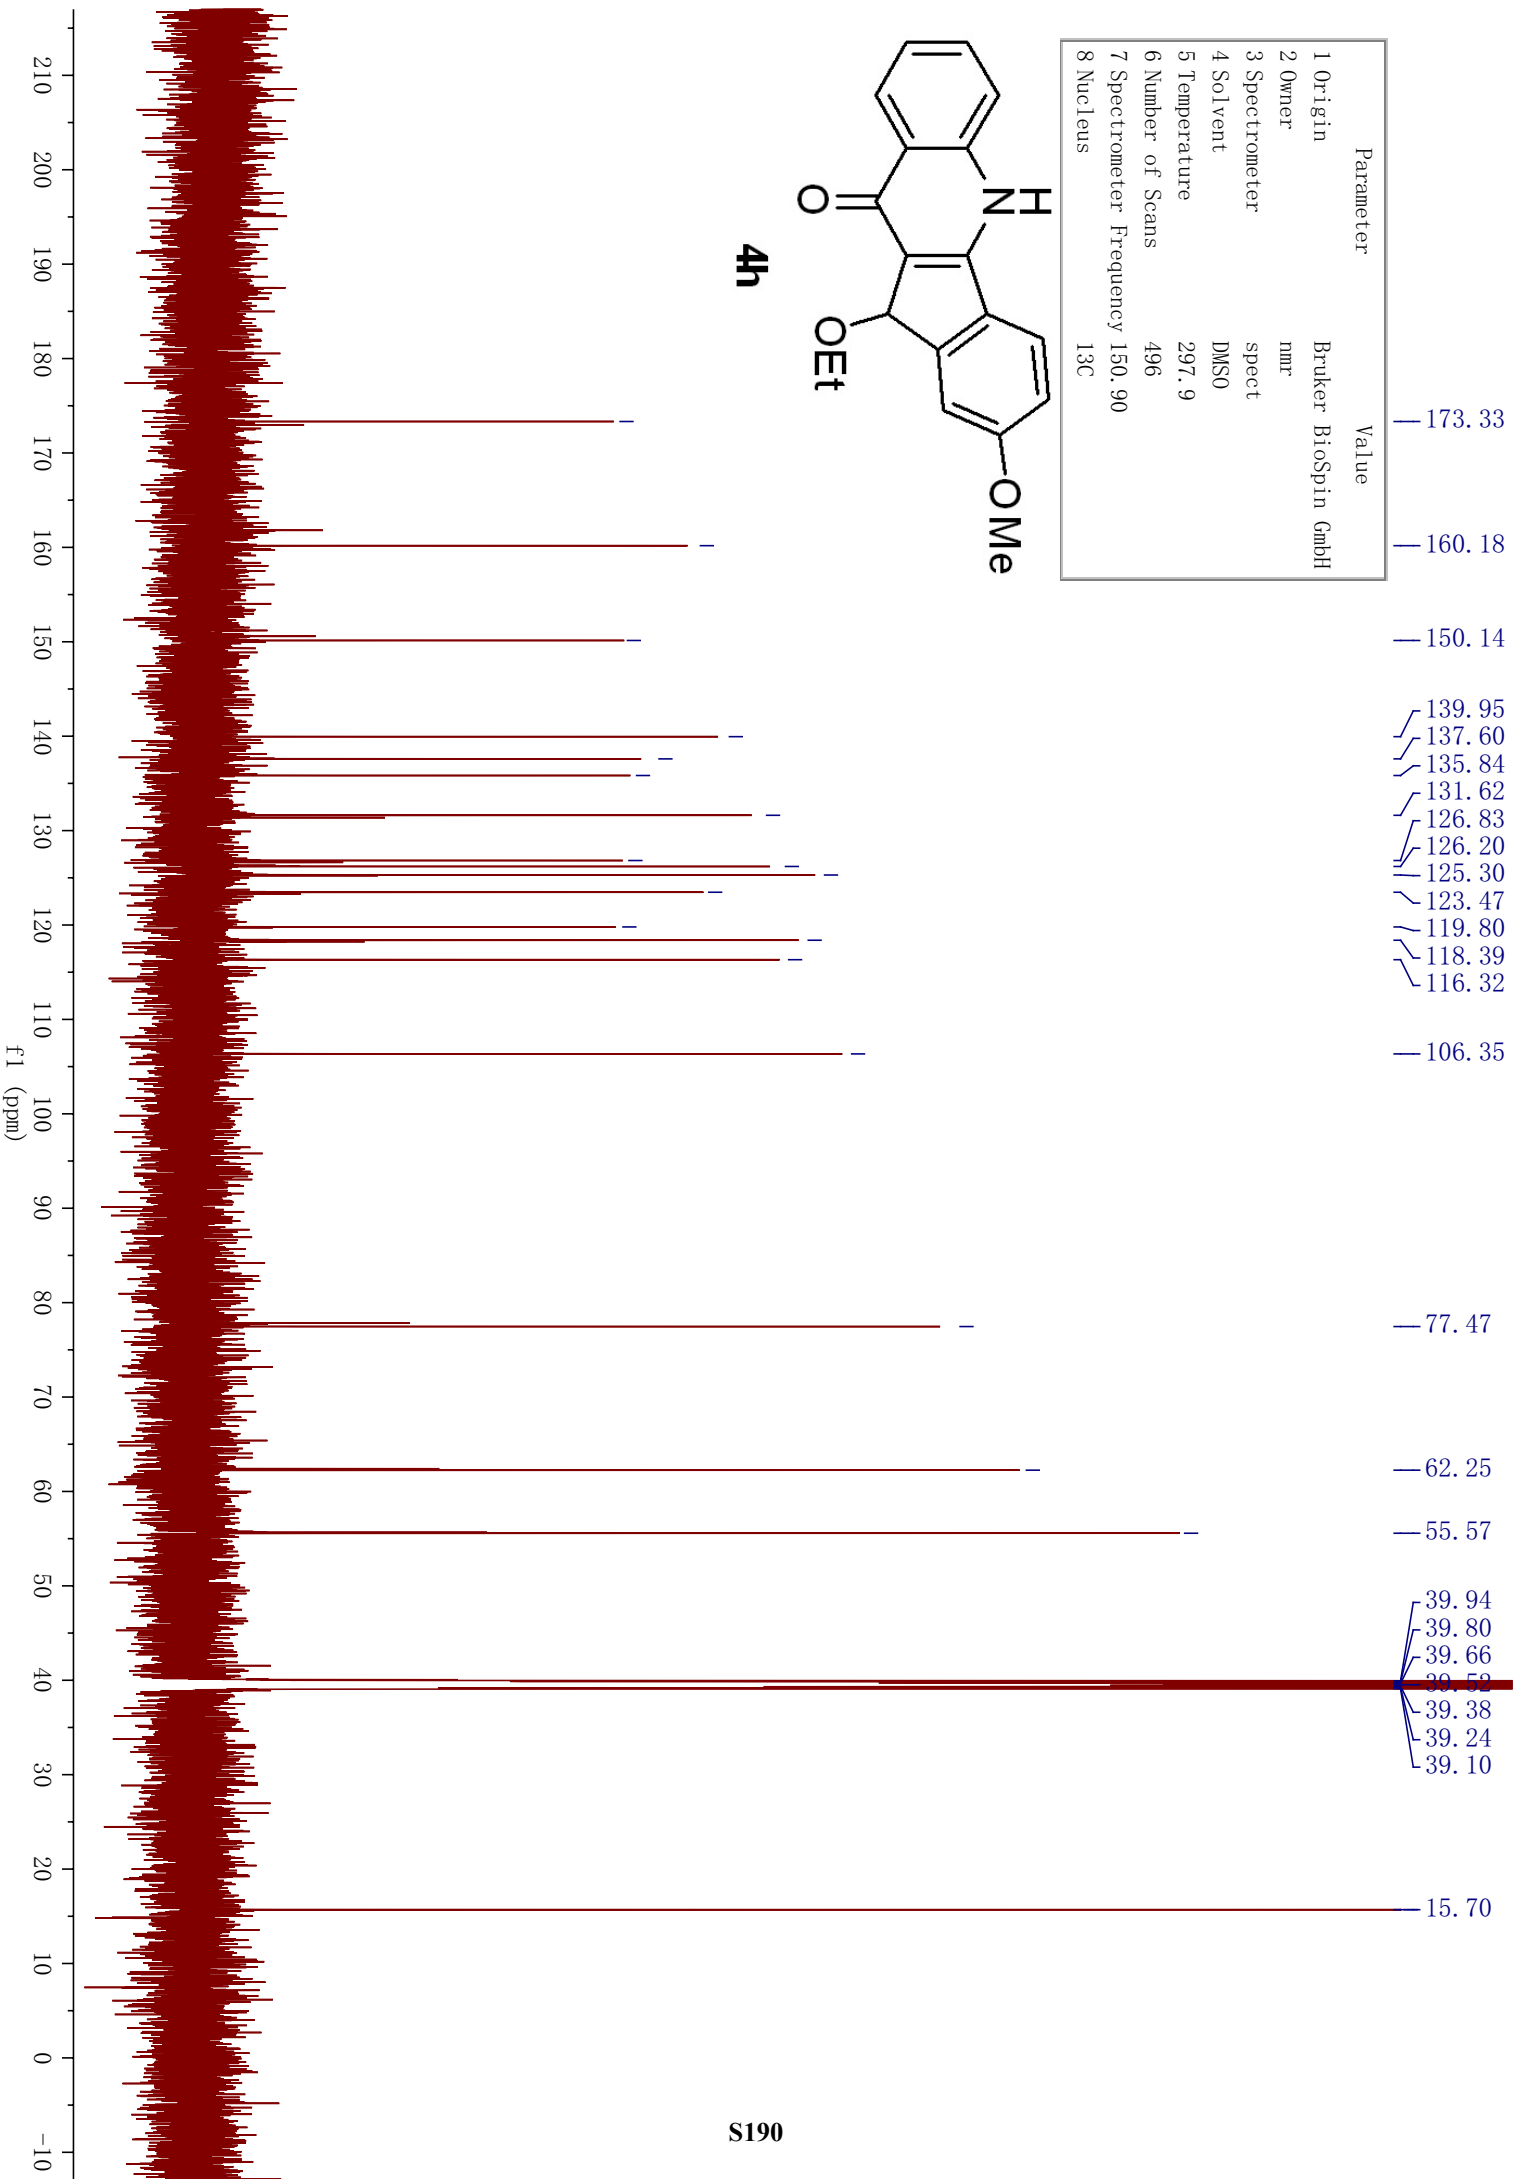

| Parameter                | Value                |
|--------------------------|----------------------|
| 1 Origin                 | Brucker BioSpin GmbH |
| 2 Owner                  | nmr                  |
| 3 Spectrometer           | spect                |
| 4 Solvent                | DMSO                 |
| 5 Temperature            | 297.9                |
| 6 Number of Scans        | 16                   |
| 7 Spectrometer Frequency | 600.13               |
| 8 Nucleus                | <sup>1</sup> H       |

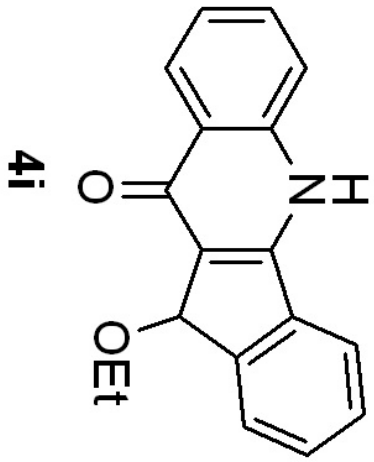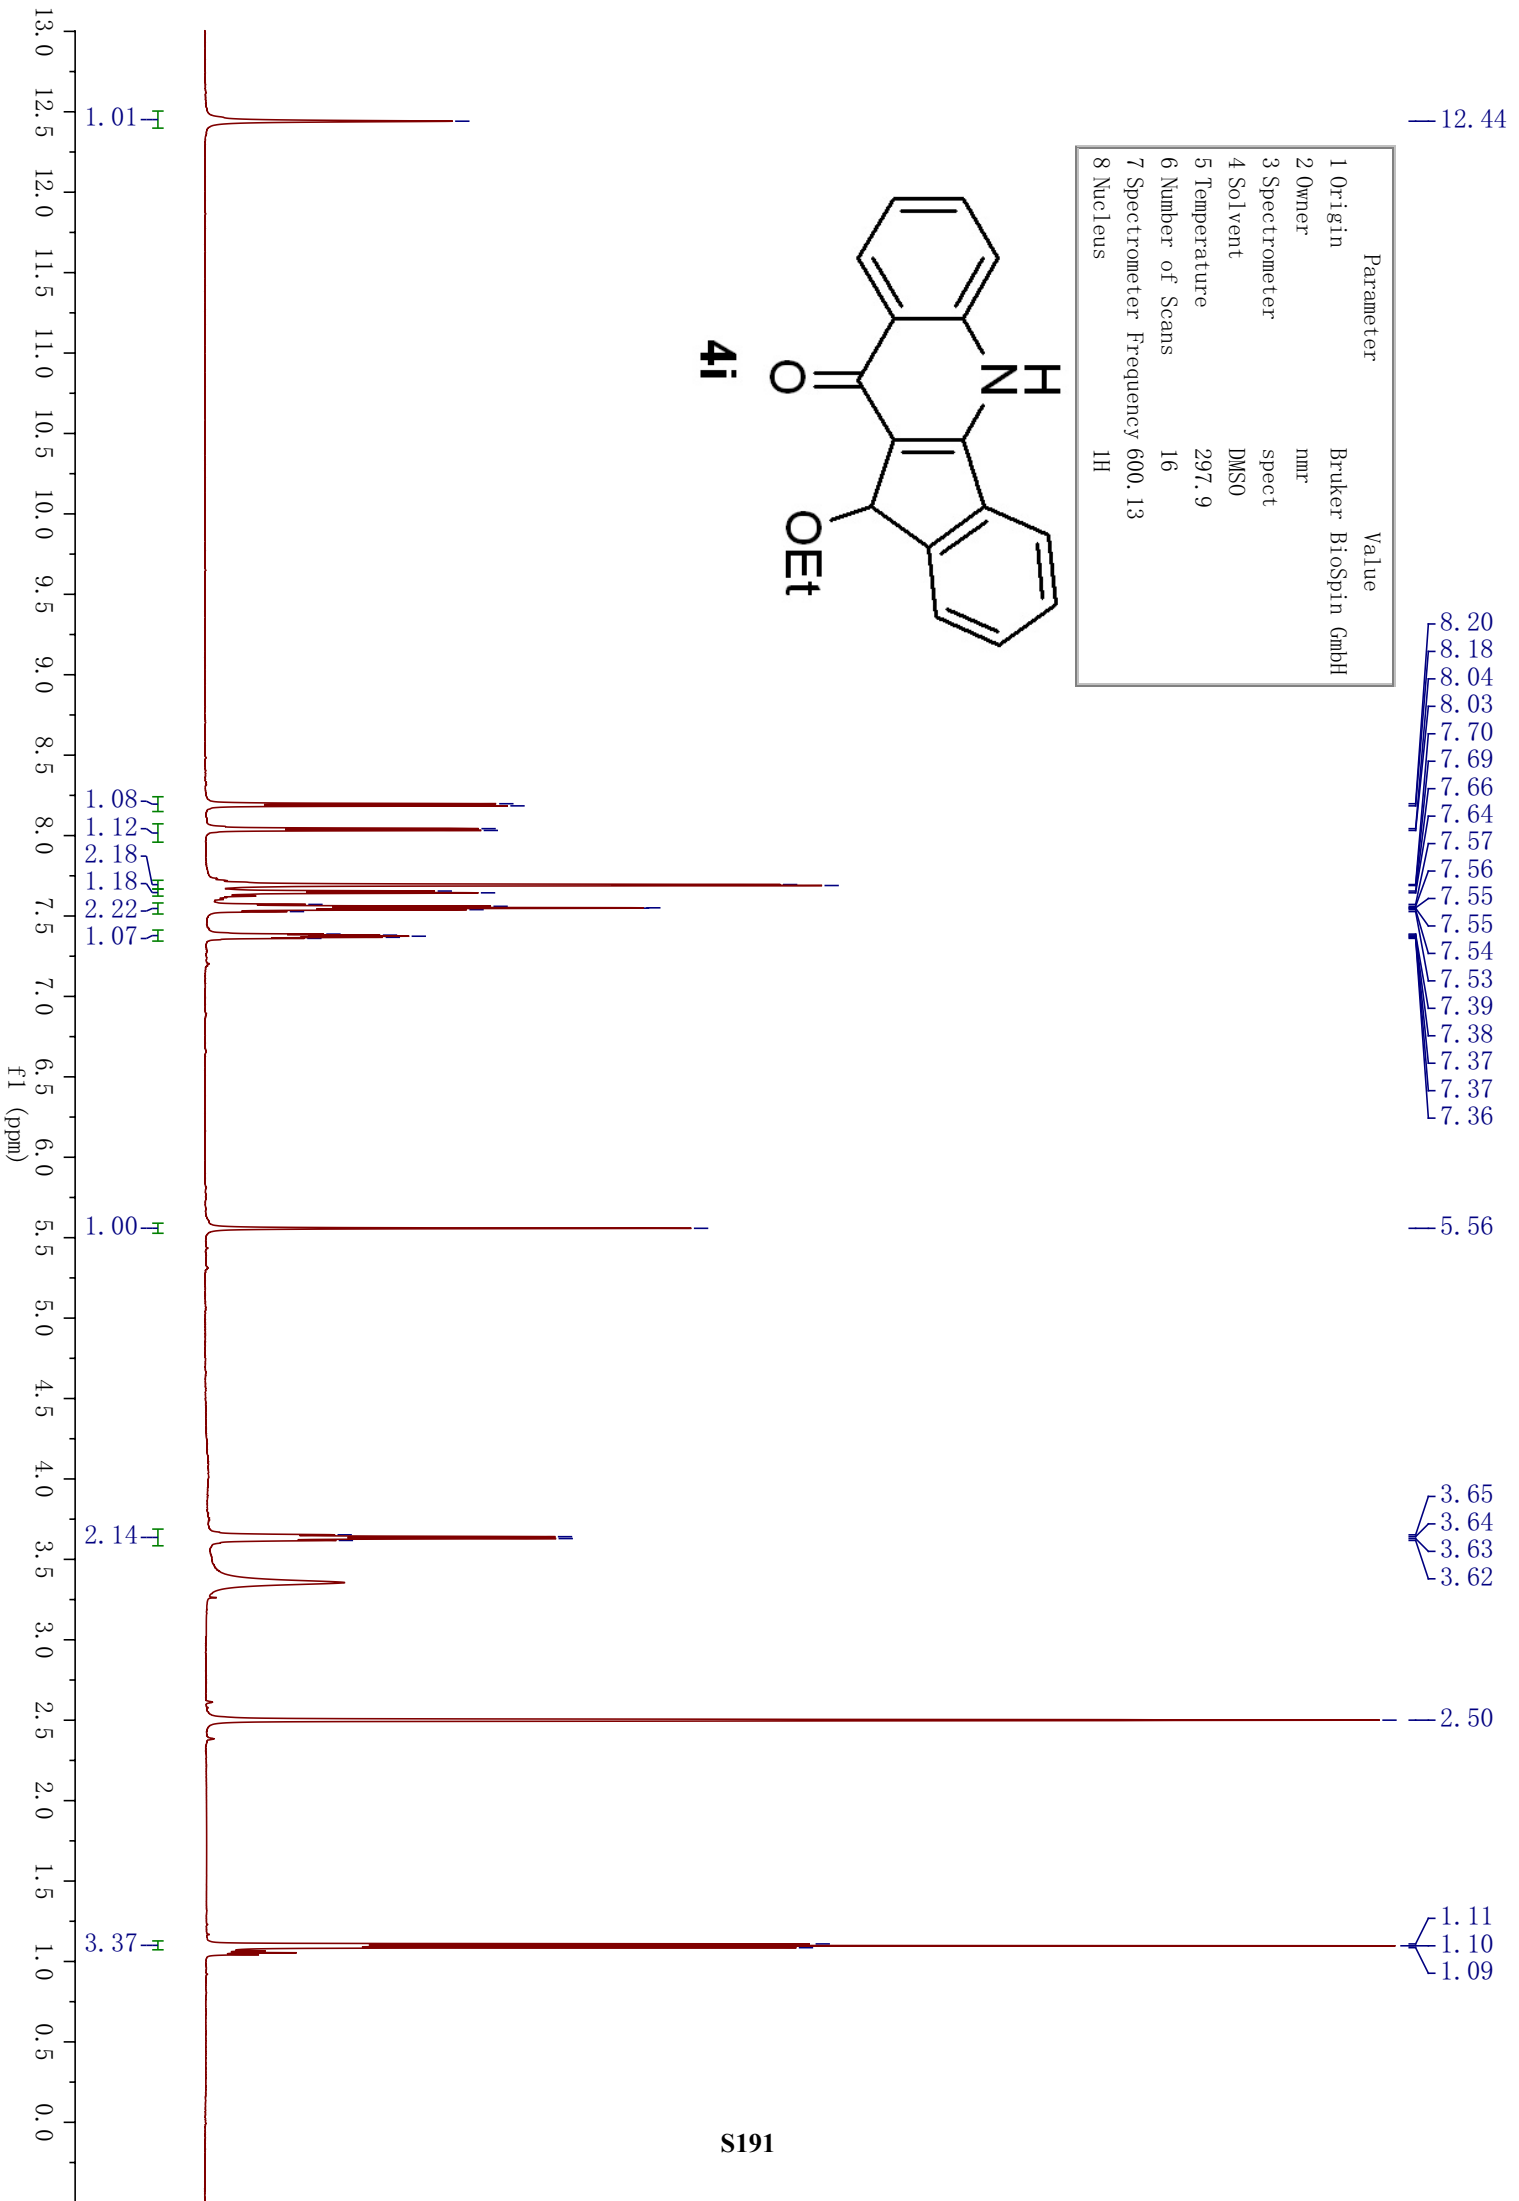

| Parameter                | Value                |
|--------------------------|----------------------|
| 1 Origin                 | Brucker BioSpin GmbH |
| 2 Owner                  | nmr                  |
| 3 Spectrometer           | spect                |
| 4 Solvent                | DMSO                 |
| 5 Temperature            | 298.0                |
| 6 Number of Scans        | 551                  |
| 7 Spectrometer Frequency | 150.90               |
| 8 Nucleus                | <sup>13</sup> C      |

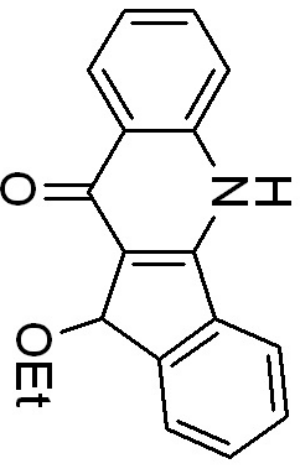

**4i**

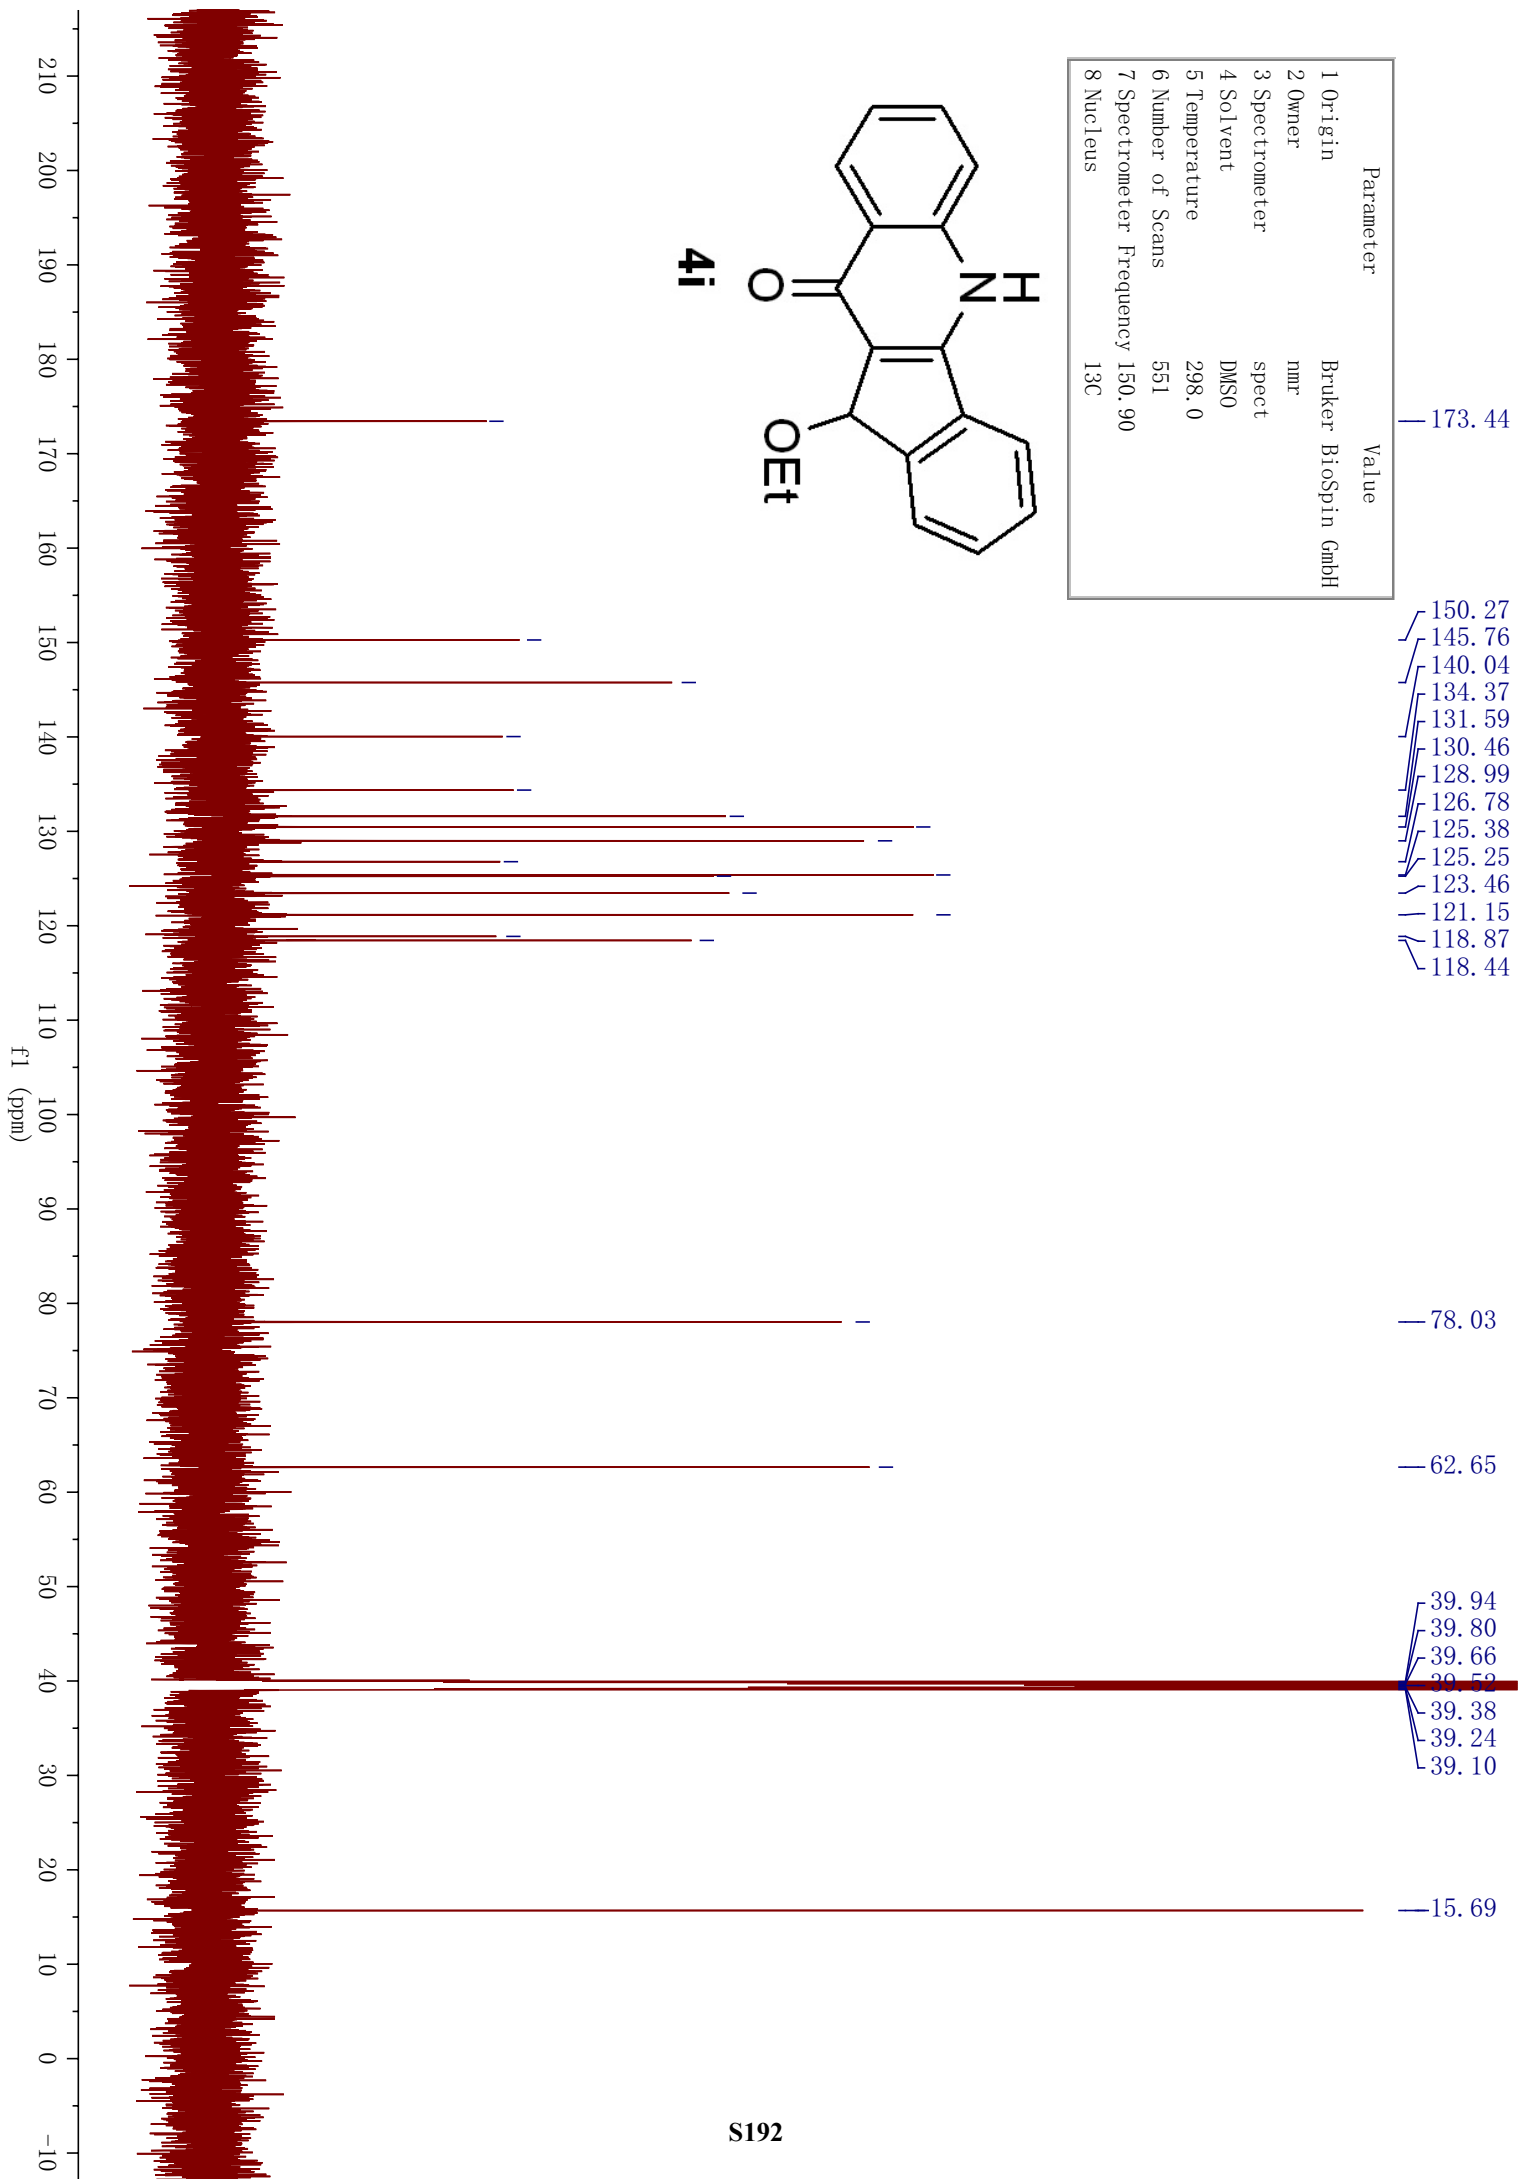

12.45  
12.44

8.19  
8.19  
8.18  
8.17  
8.06  
8.06  
8.05  
8.04  
8.05  
8.04  
8.05  
7.85  
7.84  
7.72  
7.70  
7.69  
7.68  
7.66  
7.65  
7.65  
7.42  
7.42  
7.41  
7.39  
7.38  
7.37  
7.36  
7.35  
7.33  
5.54  
5.53

3.66  
3.65  
3.64  
3.62  
3.61

2.50

1.11  
1.10  
1.09  
1.08

| Parameter                | Value                |
|--------------------------|----------------------|
| 1 Origin                 | Brucker BioSpin GmbH |
| 2 Owner                  | nmr                  |
| 3 Spectrometer           | spect                |
| 4 Solvent                | DMSO                 |
| 5 Temperature            | 297.9                |
| 6 Number of Scans        | 16                   |
| 7 Spectrometer Frequency | 600.13               |
| 8 Nucleus                | <sup>1</sup> H       |

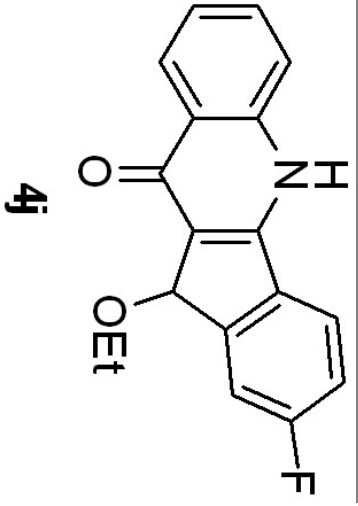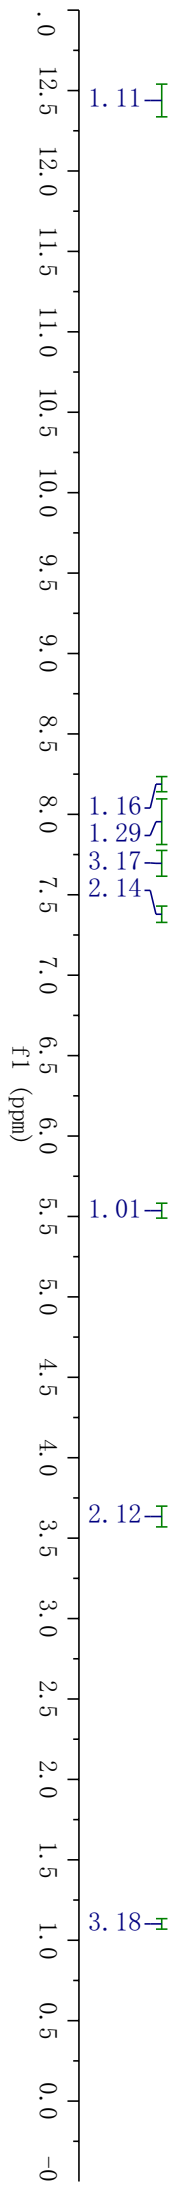

| Parameter                | Value                |
|--------------------------|----------------------|
| 1 Origin                 | Brucker BioSpin GmbH |
| 2 Owner                  | nmr                  |
| 3 Spectrometer           | spect                |
| 4 Solvent                | DMSO                 |
| 5 Temperature            | 297.9                |
| 6 Number of Scans        | 2130                 |
| 7 Spectrometer Frequency | 150.90               |
| 8 Nucleus                | <sup>13</sup> C      |

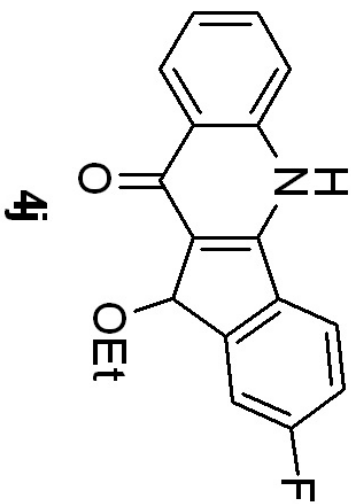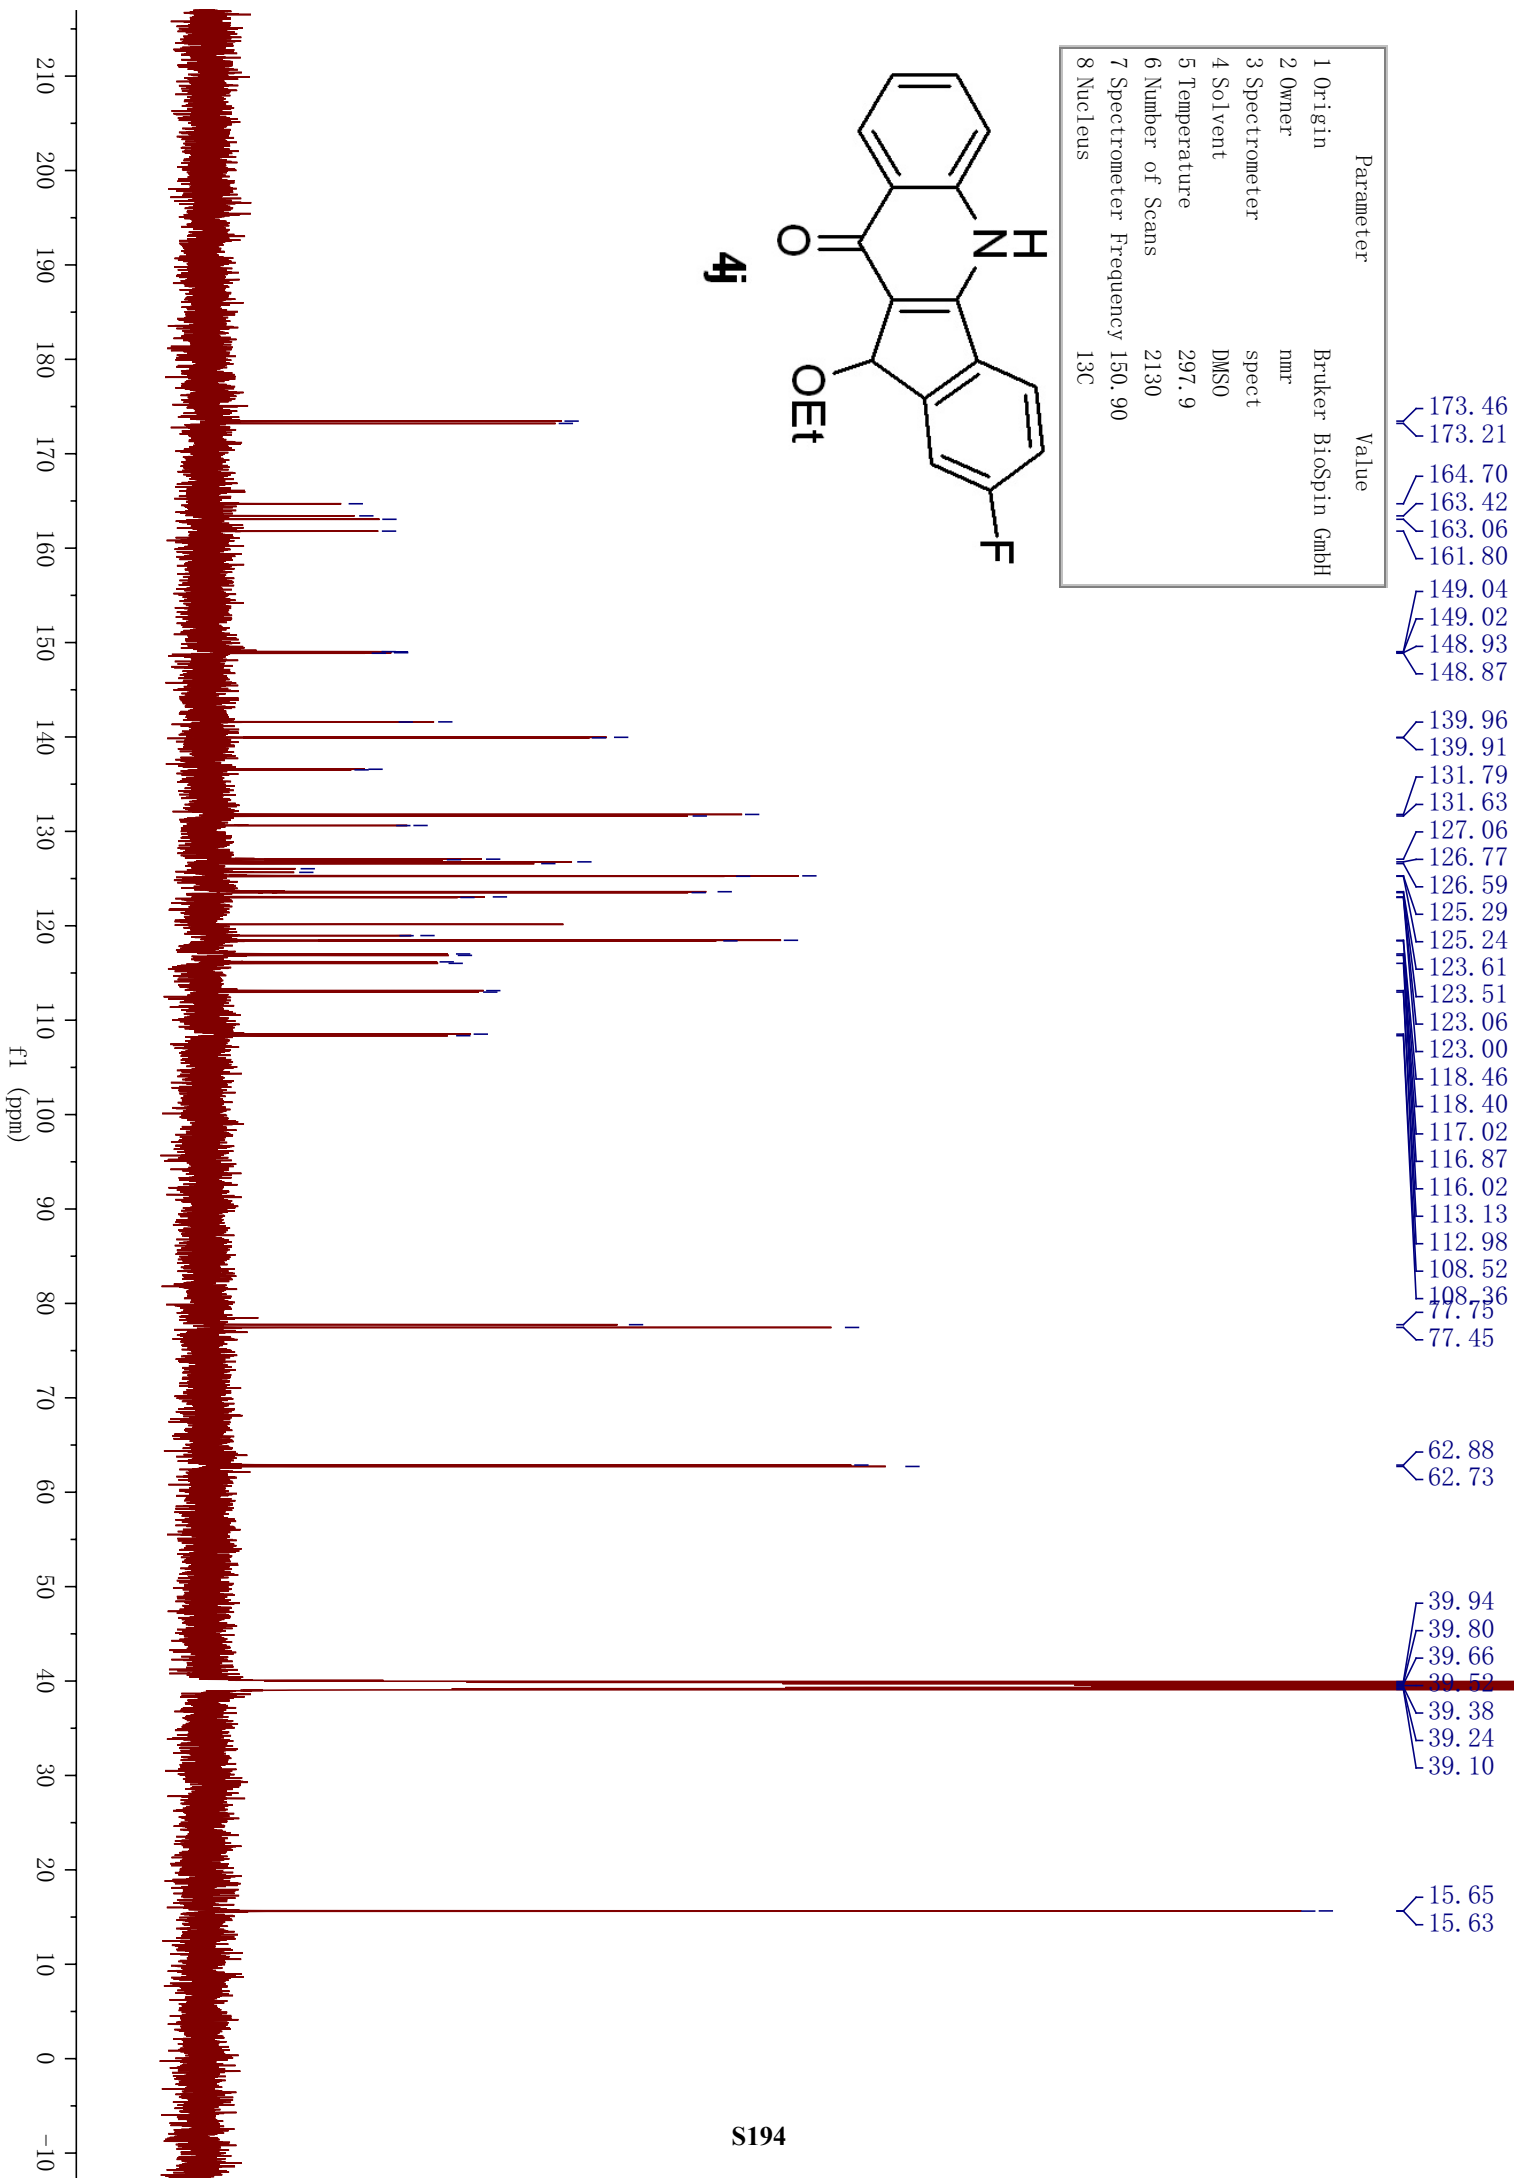

12.61  
12.55

8.06  
8.05  
7.97  
7.96  
7.70  
7.70  
7.69  
7.68  
7.66  
7.64  
7.63  
7.62  
7.61

5.51  
5.50

3.66  
3.65  
3.64  
3.63  
3.62  
3.61  
3.59

2.50

1.10  
1.09  
1.08  
1.06  
1.05  
1.04

| Parameter                | Value               |
|--------------------------|---------------------|
| 1 Origin                 | Bruker Biospin GmbH |
| 2 Owner                  | nmr                 |
| 3 Spectrometer           | spect               |
| 4 Solvent                | DMSO                |
| 5 Temperature            | 297.9               |
| 6 Number of Scans        | 16                  |
| 7 Spectrometer Frequency | 600.13              |
| 8 Nucleus                | <sup>1</sup> H      |

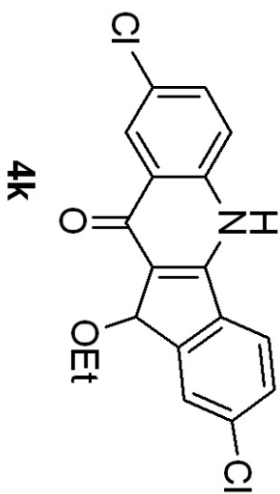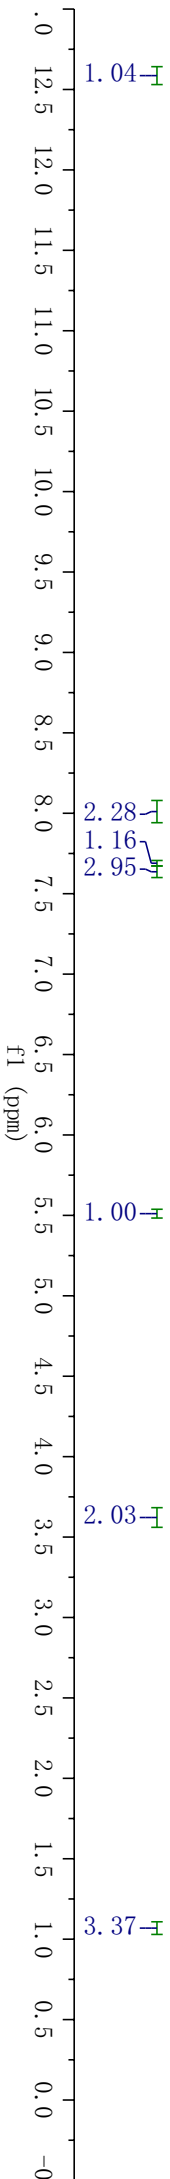



| Parameter                | Value                |
|--------------------------|----------------------|
| 1 Origin                 | Brucker Biospin GmbH |
| 2 Owner                  | nmr                  |
| 3 Spectrometer           | spect                |
| 4 Solvent                | DMSO                 |
| 5 Temperature            | 297.9                |
| 6 Number of Scans        | 1021                 |
| 7 Spectrometer Frequency | 150.90               |
| 8 Nucleus                | <sup>13</sup> C      |

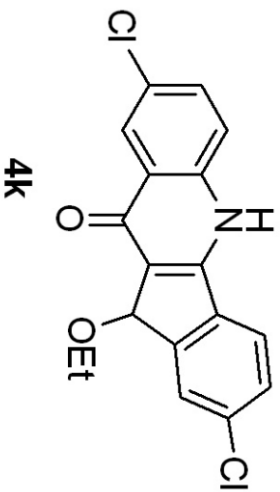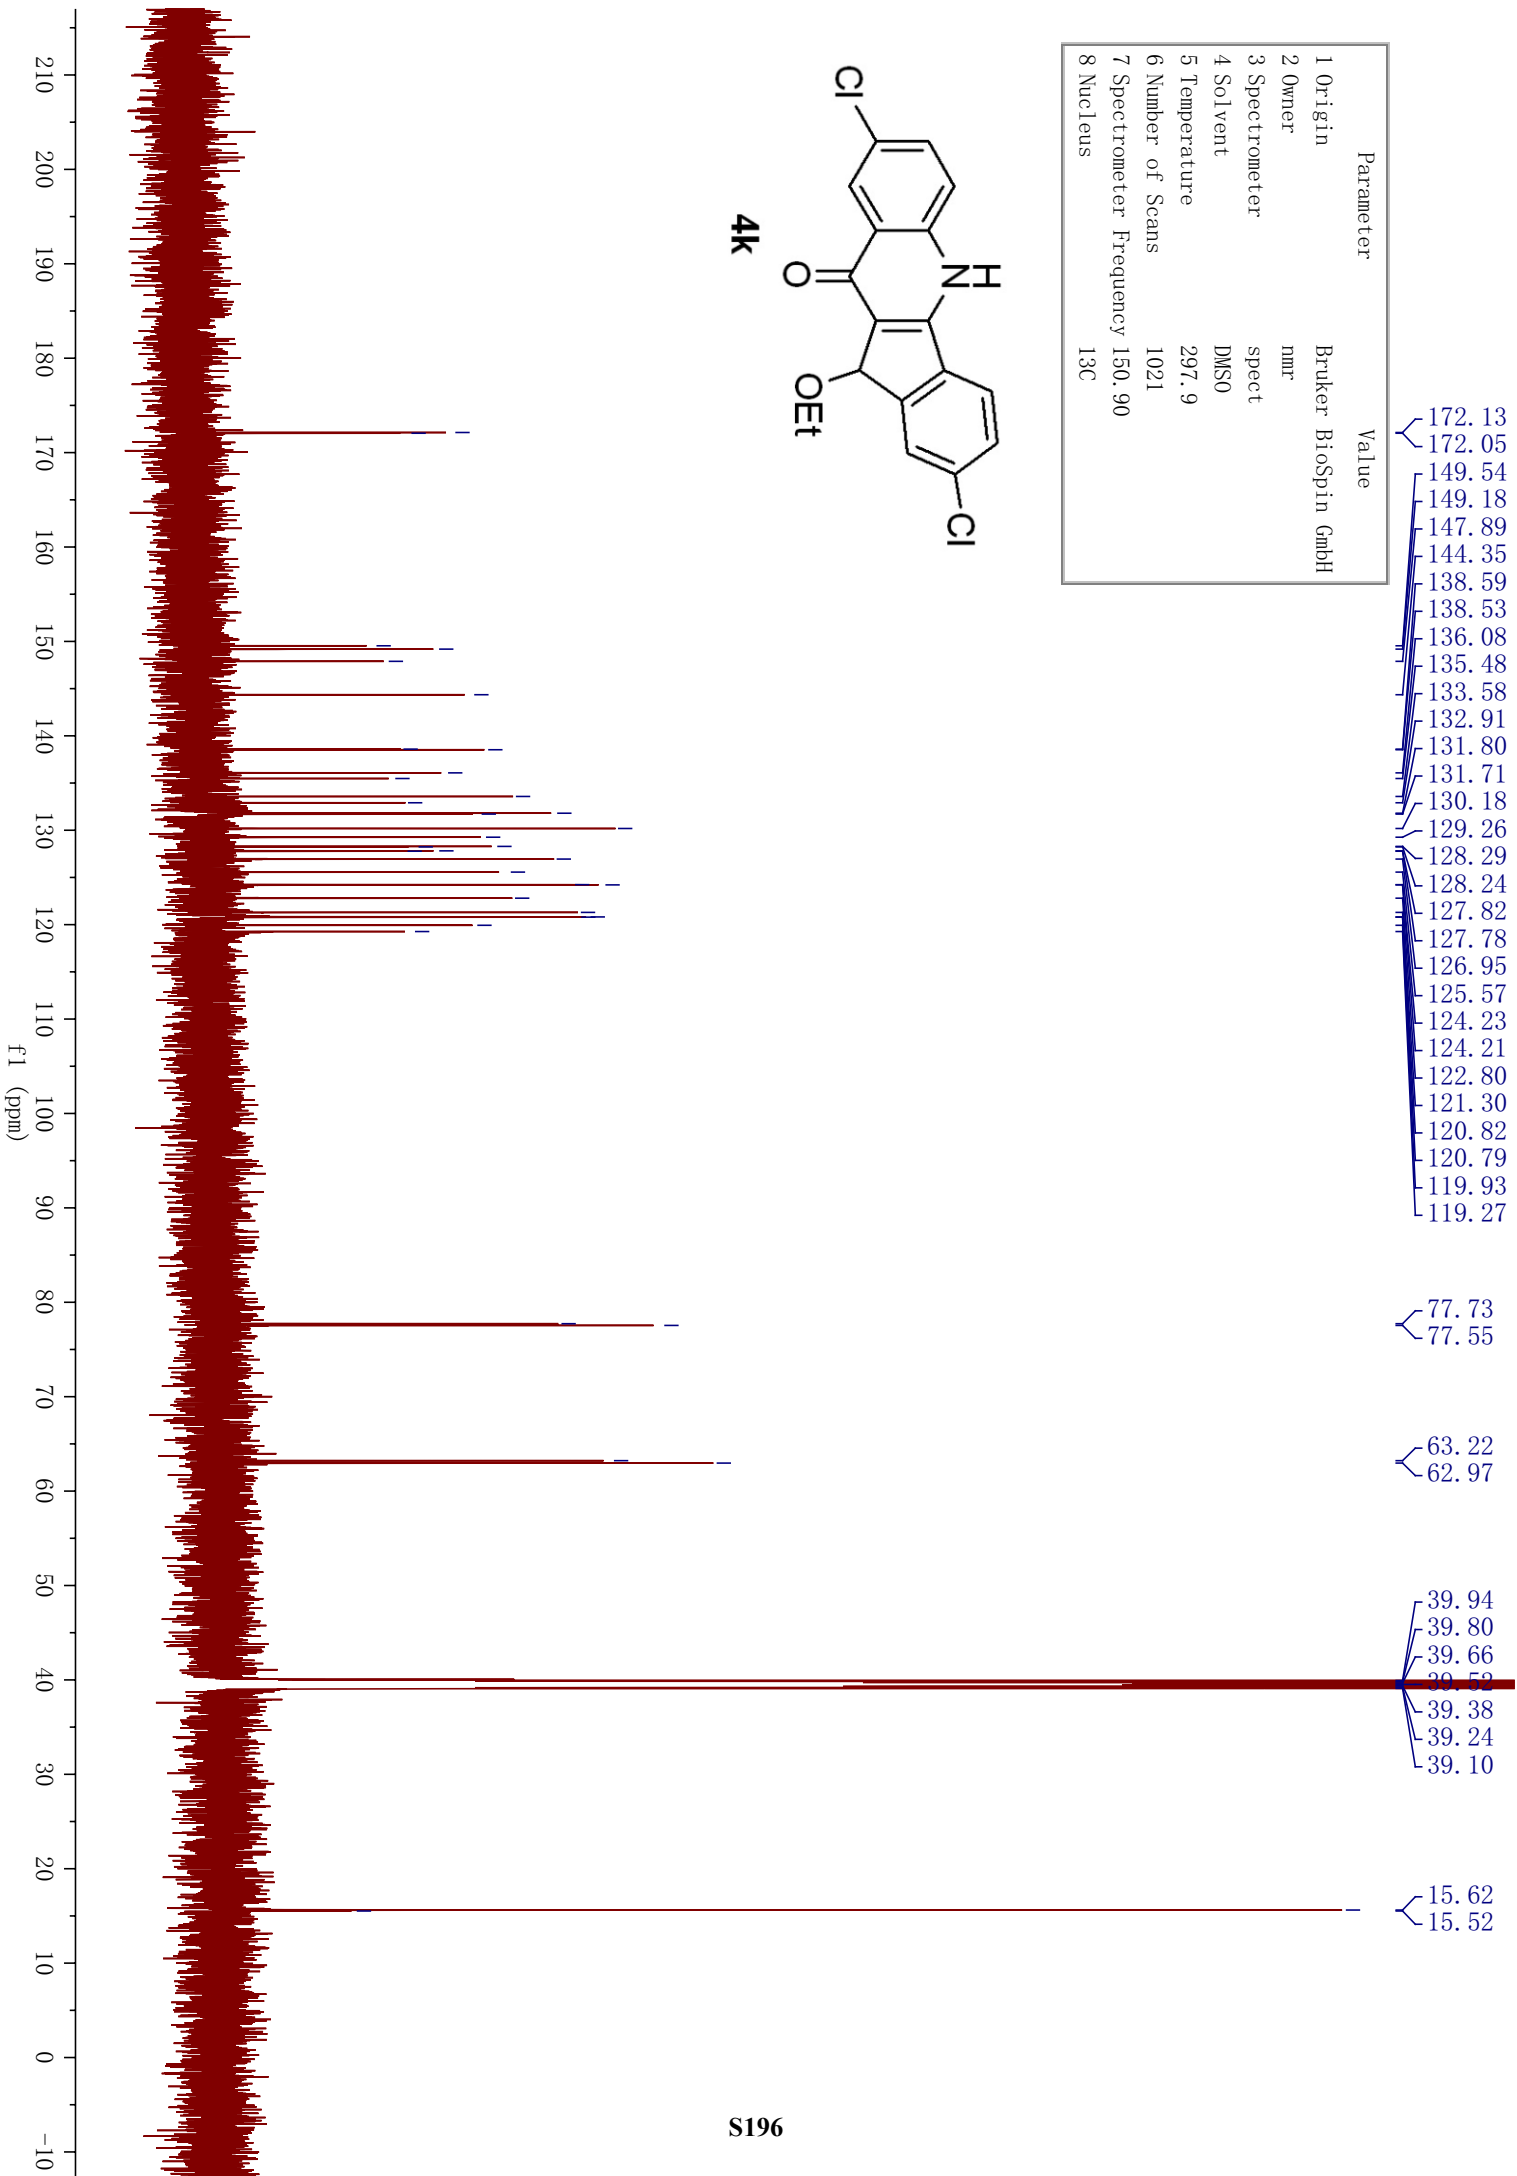

12.56  
12.53

| Parameter                | Value                |
|--------------------------|----------------------|
| 1 Origin                 | Brucker BioSpin GmbH |
| 2 Owner                  | nmr                  |
| 3 Spectrometer           | spect                |
| 4 Solvent                | DMSO                 |
| 5 Temperature            | 297.9                |
| 6 Number of Scans        | 16                   |
| 7 Spectrometer Frequency | 600.13               |
| 8 Nucleus                | <sup>1</sup> H       |

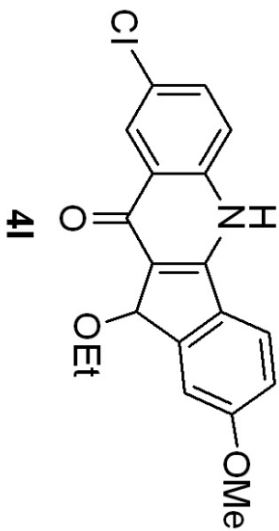

8.09  
8.08

7.71  
7.69  
7.62  
7.11  
7.09  
7.08

5.49  
5.48

3.87  
3.61  
3.59  
3.59  
3.58  
3.56

2.50

1.10  
1.09  
1.08  
1.07  
1.05  
1.04

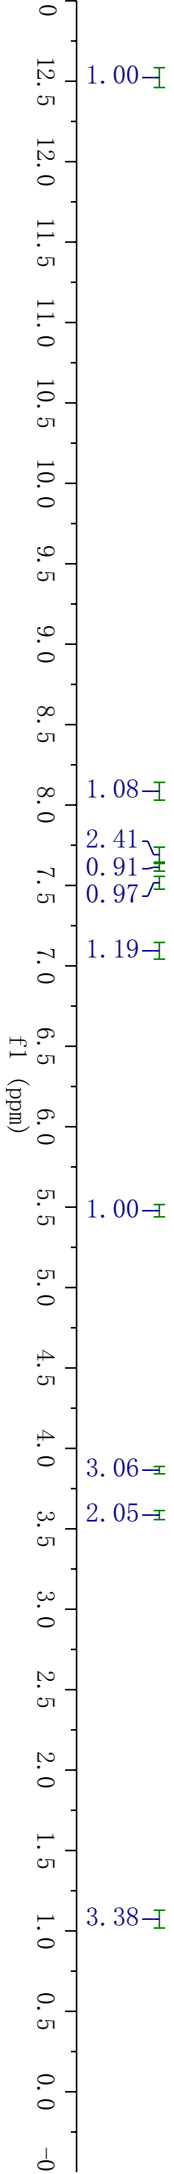

| Parameter                | Value               |
|--------------------------|---------------------|
| 1 Origin                 | Bruker Biospin GmbH |
| 2 Owner                  | nmr                 |
| 3 Spectrometer           | spect               |
| 4 Solvent                | DMSO                |
| 5 Temperature            | 297.9               |
| 6 Number of Scans        | 3883                |
| 7 Spectrometer Frequency | 150.90              |
| 8 Nucleus                | <sup>13</sup> C     |

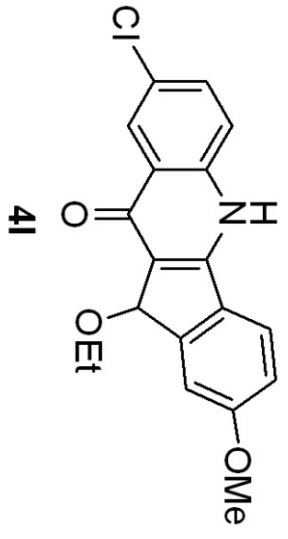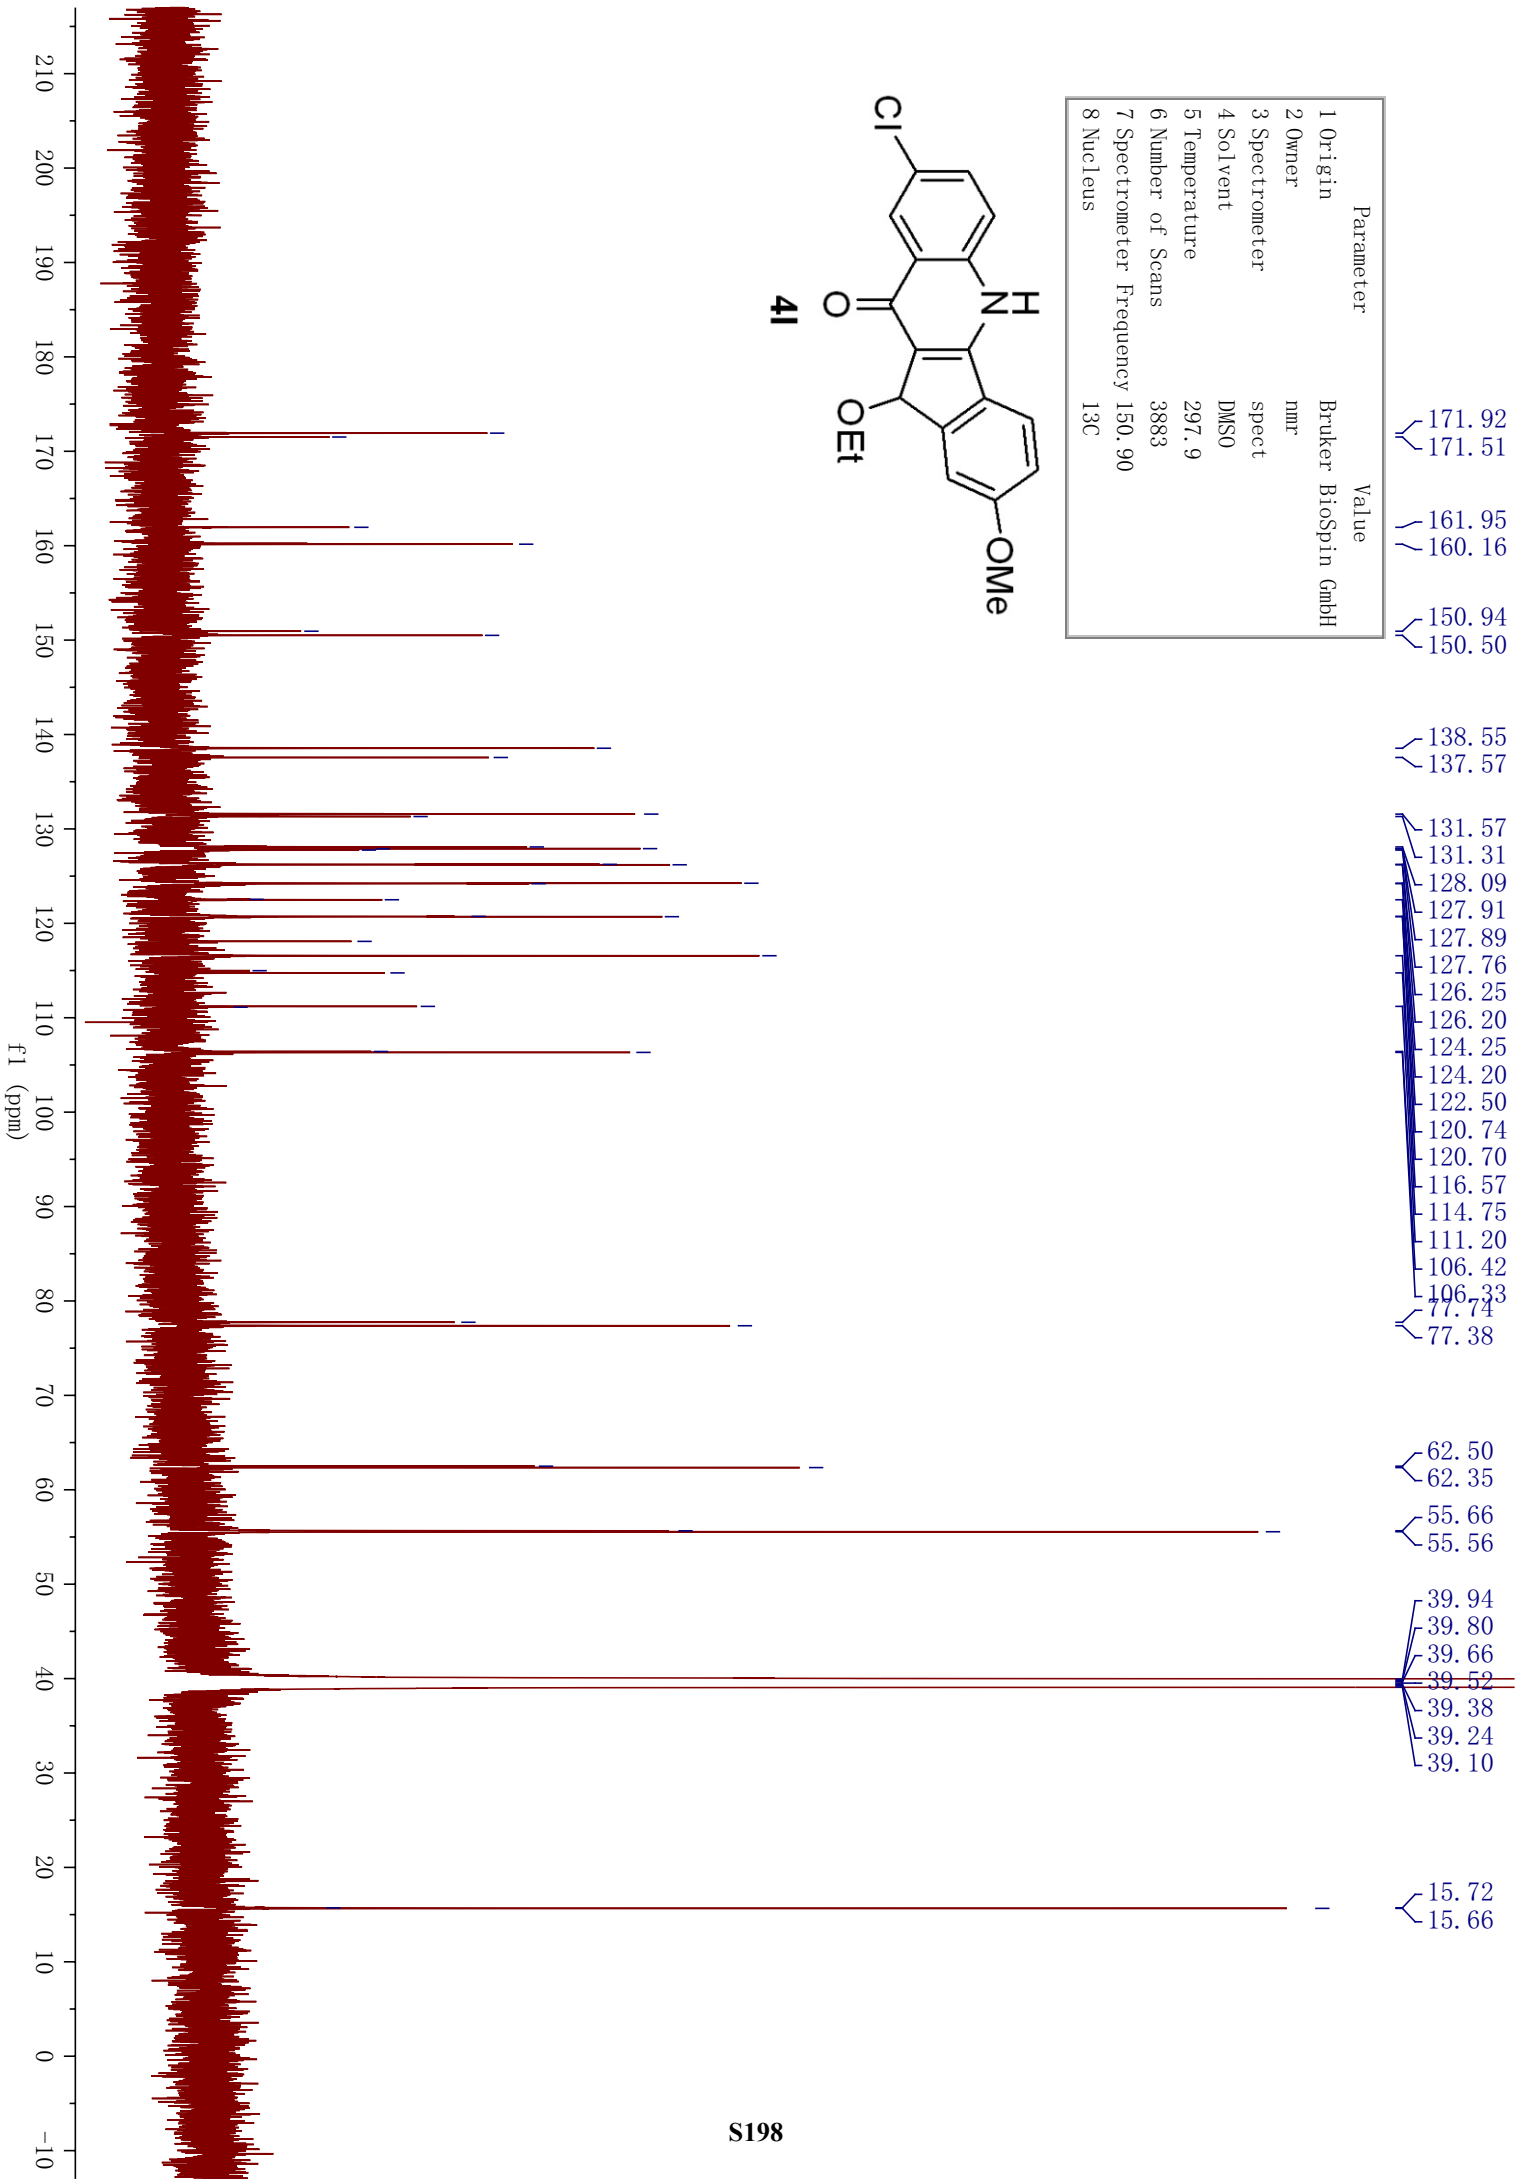

## 11. X-Ray Crystal Structure Analyses

|                                             |                                                               |
|---------------------------------------------|---------------------------------------------------------------|
| Identification code                         | exp_5651                                                      |
| Empirical formula                           | C <sub>19</sub> H <sub>16</sub> O <sub>3</sub>                |
| Formula weight                              | 292.32                                                        |
| Temperature/K                               | 180.01(10)                                                    |
| Crystal system                              | triclinic                                                     |
| Space group                                 | P-1                                                           |
| a/Å                                         | 7.0903(5)                                                     |
| b/Å                                         | 10.2299(10)                                                   |
| c/Å                                         | 11.0836(10)                                                   |
| α/°                                         | 67.824(9)                                                     |
| β/°                                         | 77.107(7)                                                     |
| γ/°                                         | 79.532(7)                                                     |
| Volume/Å <sup>3</sup>                       | 721.45(12)                                                    |
| Z                                           | 2                                                             |
| ρ <sub>calc</sub> /cm <sup>3</sup>          | 1.346                                                         |
| μ/mm <sup>-1</sup>                          | 0.090                                                         |
| F(000)                                      | 308.0                                                         |
| Crystal size/mm <sup>3</sup>                | 0.1 × 0.1 × 0.05                                              |
| Radiation                                   | MoKα (λ = 0.71073)                                            |
| 2θ range for data collection/°              | 6.578 to 52.042                                               |
| Index ranges                                | -7 ≤ h ≤ 8, -10 ≤ k ≤ 12, -12 ≤ l ≤ 13                        |
| Reflections collected                       | 4530                                                          |
| Independent reflections                     | 2826 [R <sub>int</sub> = 0.0237, R <sub>sigma</sub> = 0.0459] |
| Data/restraints/parameters                  | 2826/0/202                                                    |
| Goodness-of-fit on F <sup>2</sup>           | 1.100                                                         |
| Final R indexes [I ≥ 2σ (I)]                | R <sub>1</sub> = 0.0538, wR <sub>2</sub> = 0.1363             |
| Final R indexes [all data]                  | R <sub>1</sub> = 0.0736, wR <sub>2</sub> = 0.1531             |
| Largest diff. peak/hole / e Å <sup>-3</sup> | 0.57/-0.28                                                    |

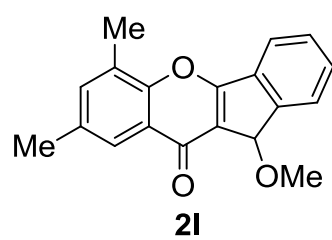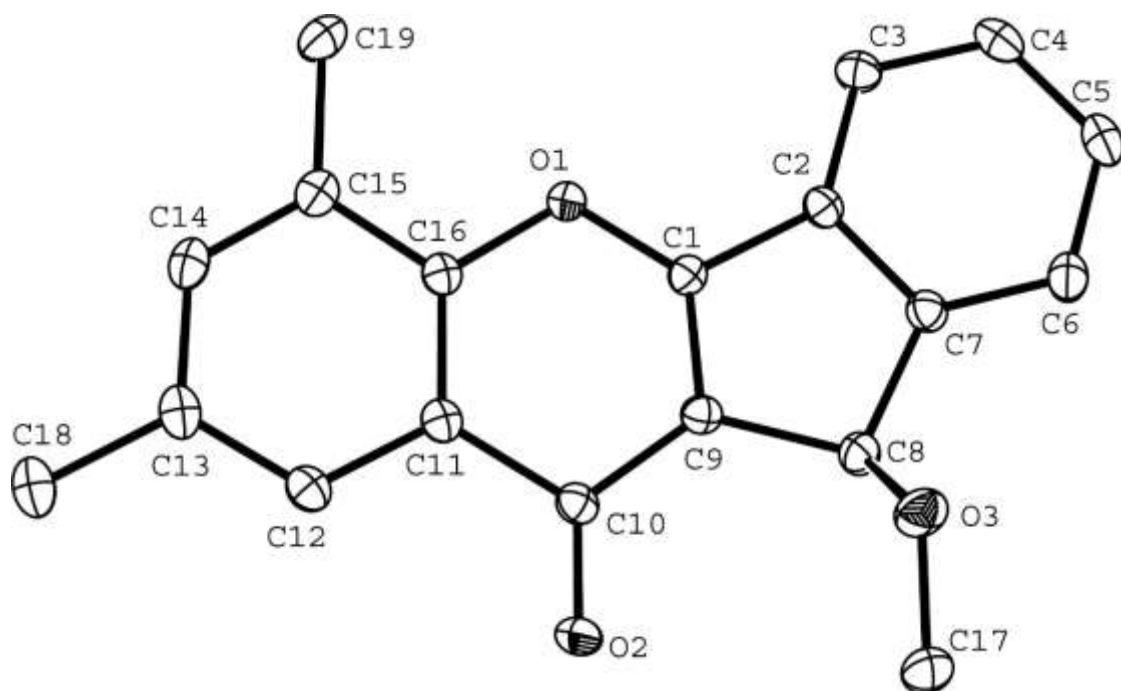

Supplement: c6cc05391b1.pdf [file c6cc05391b1.pdf]
